# Supplementary material
Source: PubMed Central journal article supplement (PMC3936205)
Supplement: NIHMS551546-supplement-1_si_001.pdf [file NIHMS551546-supplement-1_si_001.pdf]

# Human Cellular Retinaldehyde-Binding Protein Has Secondary Thermal 9-*cis*-Retinal Isomerase Activity - Supplementary Information

Christin S. Bolze<sup>1,2</sup>, Rachel E. Helbling<sup>1</sup>, Robin L. Owen<sup>3</sup>, Arwen R. Pearson<sup>4</sup>, Guillaume Pompidor<sup>5,1</sup>, Florian Dworkowski<sup>5</sup>, Martin R. Fuchs<sup>5,ii</sup>, Julien Furrer<sup>1</sup>, Marcin Golczak<sup>6</sup>, Krzysztof Palczewski<sup>6</sup>, Michele Cascella<sup>1\*</sup> and Achim Stocker<sup>1\*</sup>

1. Department of Chemistry and Biochemistry, University of Bern, Freiestrasse 3, 3012 Bern, Switzerland
2. Graduate School for Cellular and Biomedical Sciences, University of Bern, Switzerland
3. Diamond Light Source, Harwell Science and Innovation Campus, Didcot, OX11 0DE, United Kingdom
4. Astbury Centre for Structural Molecular Biology, University of Leeds, Leeds, LS2 9JT, United Kingdom
5. Swiss Light Source, Paul Scherrer Institut, 5232 Villigen PSI, Switzerland
6. Department of Pharmacology, School of Medicine, Case Western Reserve University, 2109 Adelbert Rd, Cleveland, OH 44106-4965, USA

E-mail: [achim.stocker@ibc.unibe.ch](mailto:achim.stocker@ibc.unibe.ch), [michele.cascella@iac.unibe.ch](mailto:michele.cascella@iac.unibe.ch)

---

<sup>i</sup> Present address: EMBL Hamburg c/o DESY, Building 25A, Notkestraße 85, 22603 Hamburg, Germany.

<sup>ii</sup> Present address: Brookhaven National Lab PO Box 5000 Upton, NY 11973-5000, USA.

**Table S1:** Data collection and refinement statistics for R234W:9-*cis*-retinal and WT CRALBP:9-*cis*-retinal

| <b>Structural data</b>            | <b>R234W:9-<i>cis</i>-retinal</b>                                                     | <b>WT CRALBP:9-<i>cis</i>-retinal</b>                                                          |
|-----------------------------------|---------------------------------------------------------------------------------------|------------------------------------------------------------------------------------------------|
| Beam line                         | PSI PX III                                                                            | PSI PX III                                                                                     |
| Wavelength (Å)                    | 1.00                                                                                  | 1.00                                                                                           |
| Resolution (Å)                    | 50.0-1.9 (2.01-1.90)*                                                                 | 50.0-3.4 (3.61-3.40)*                                                                          |
| <b>Cell dimension</b>             |                                                                                       |                                                                                                |
| Space group                       | 5, C2                                                                                 | 179, P6 <sub>5</sub> 22                                                                        |
| Unit cell (Å)                     | $a = 87.9, b = 57.9, c = 75.2;$<br>$\alpha = \gamma = 90^\circ; \beta = 122.9^\circ;$ | $a = 70.6, b = 70.6, c = 299.8;$<br>$\alpha = 90^\circ, \beta = 90^\circ, \gamma = 120^\circ;$ |
| Measured reflection / unique      | 116260/ 25014                                                                         | 87901 / 6770                                                                                   |
| Average multiplicity              | 4.6 (4.5)                                                                             | 13.0 (12.7)                                                                                    |
| Completeness (%)                  | 98.4 (92.9)                                                                           | 99.6 (98.5)                                                                                    |
| Average $I / \sigma(I)$           | 18.48 (4.12)                                                                          | 22.68 (2.74)                                                                                   |
| $R_{\text{merge}}$ (%)            | 8.7 (41.3)                                                                            | 10.3 (64.9)                                                                                    |
| Wilson B-factor                   | 30.5                                                                                  | 102.7                                                                                          |
| <b>Refinement</b>                 |                                                                                       |                                                                                                |
| Resolution range (Å)              | 44.75-1.90                                                                            | 47.36-3.40                                                                                     |
| $R_{\text{work}}$ (%)             | 16.51                                                                                 | 23.40                                                                                          |
| $R_{\text{free}}$ (%)             | 19.75                                                                                 | 26.49                                                                                          |
| Average Biso (Å <sup>2</sup> )    |                                                                                       |                                                                                                |
| All atoms                         | 31.5                                                                                  | 170.9                                                                                          |
| Protein atoms                     | 29.74                                                                                 | 171                                                                                            |
| Ligand atoms                      | 31.99                                                                                 | 133.4                                                                                          |
| Solvent atoms                     | 43.18                                                                                 | 112.5                                                                                          |
| RMSD from ideality angles (°)     | 0.841                                                                                 | 0.57                                                                                           |
| Bonds (Å)                         | 0.005                                                                                 | 0.003                                                                                          |
| Water molecules                   | 308                                                                                   | 4                                                                                              |
| Ligand molecules                  | 1                                                                                     | 2                                                                                              |
| Protein Data Bank deposition code | 4cj6                                                                                  | 4ciz                                                                                           |

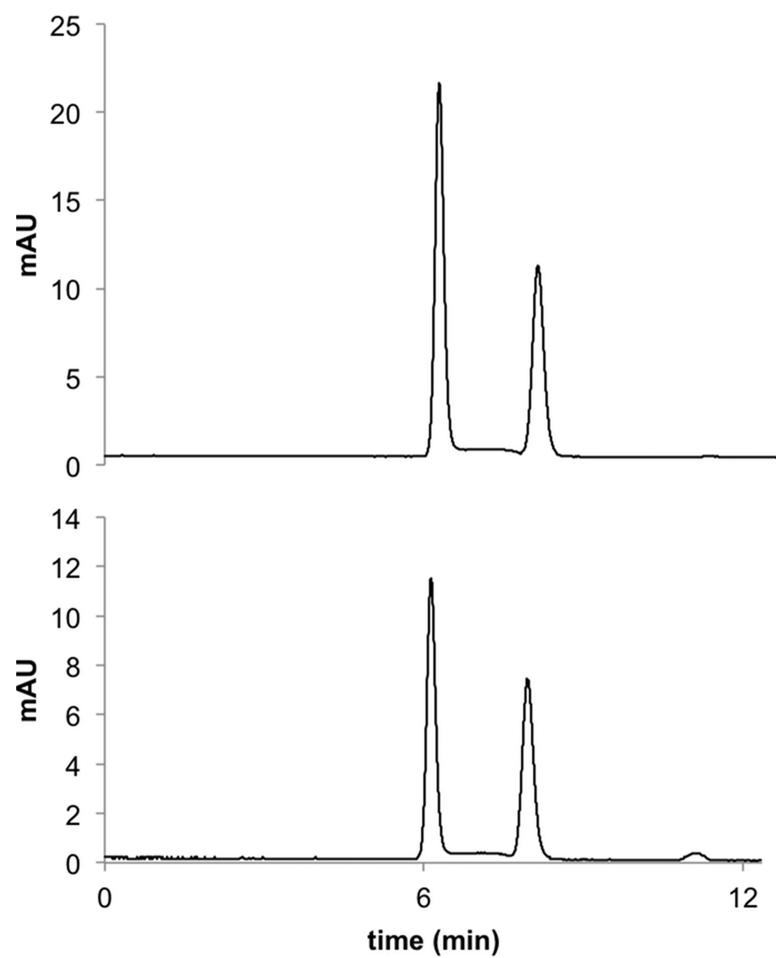

**Figure S1:** HPLC traces of retinoid extracts of R234W:9-*cis*-retinal freshly prepared (top), and after 48 h incubation at 37°C (bottom).

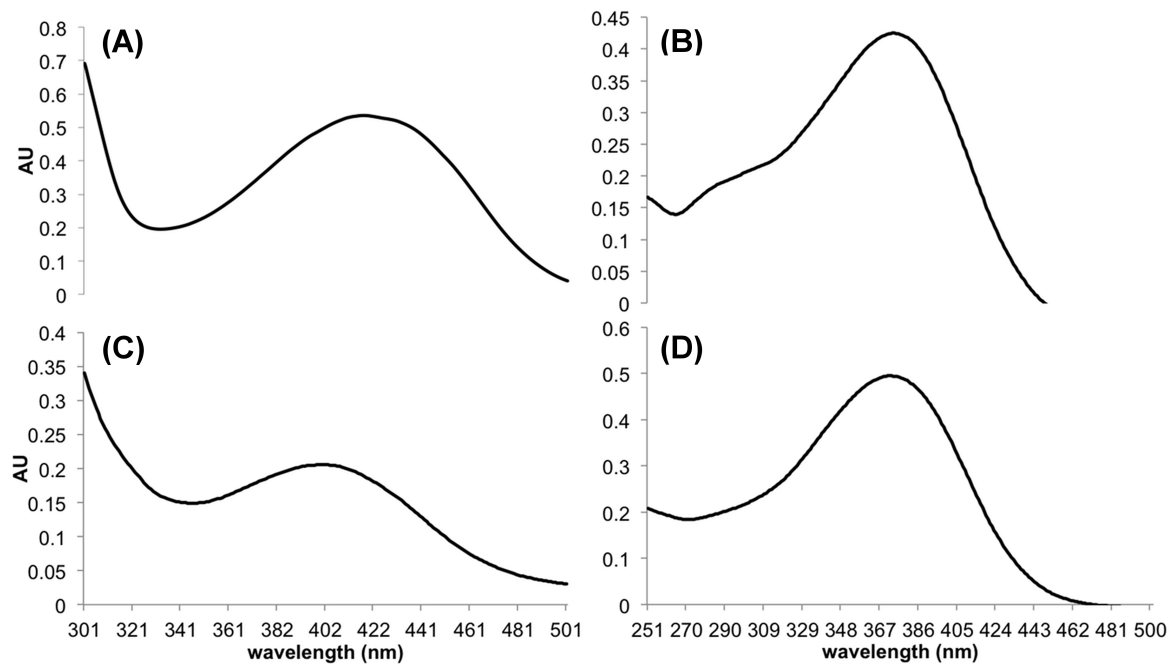

**Figure S2:** UV/VIS spectra of protein-ligand complexes in buffer and free ligands dissolved in pure ethanol. **(A)** Freshly prepared WT CRALBP:9-*cis*-retinal complex containing ~15% of 9,13-*dicis*-retinal (determined by HPLC). The complex has an absorption maximum at 415 nm. **(B)** Spectrum of free retinoids extracted from freshly prepared WT CRALBP:9-*cis*-retinal. Free 9-*cis*-retinal has an absorption maximum of 373 nm. **(C)** WT CRALBP:9-*cis*-retinal complex after incubation for 21 h at 37° containing ~85% of 9,13-*dicis*-retinal. The absorption maximum of the complex is at 400 nm. **(D)** Spectrum of free 9,13-*dicis*-retinal dissolved in pure ethanol has an absorption maximum at 368 nm.

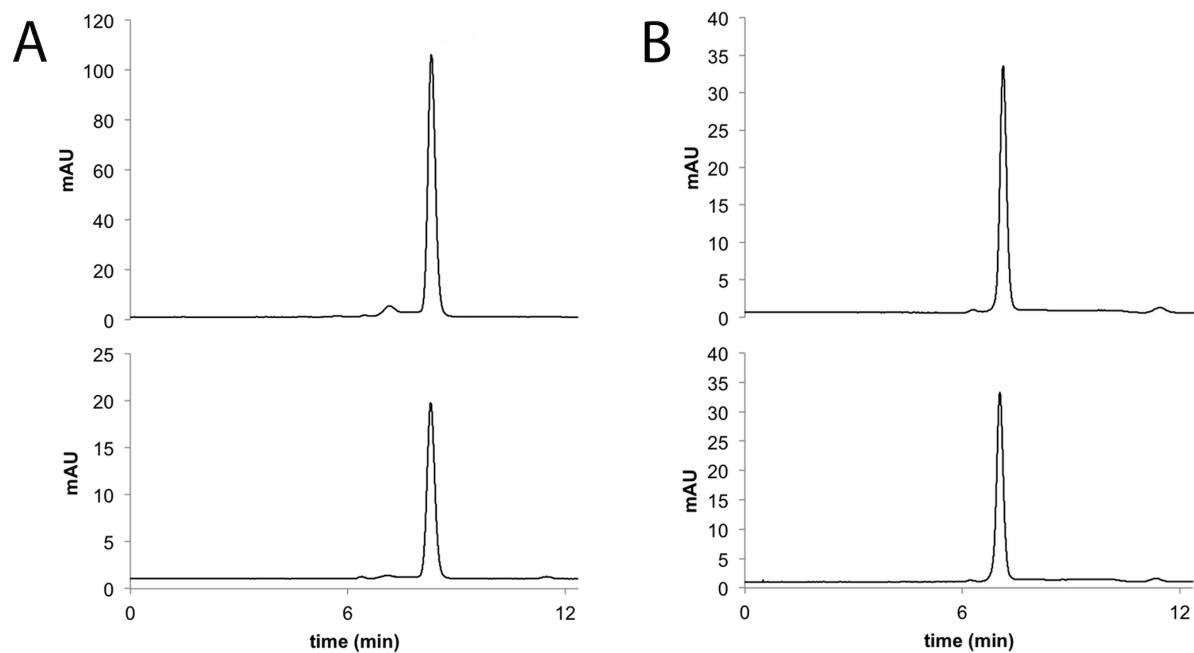

**Figure S3. Negative controls for the isomerization reaction.** A) HPLC traces of retinoid extracts of free 9-*cis*-retinal dissolved in buffer containing 2% ethanol (top) and after 24 h incubation at 37°C (bottom). B) HPLC traces of retinoid extracts of CRALBP:11-*cis*-retinal freshly prepared (top) and after 48 h incubation at 37°C (bottom).

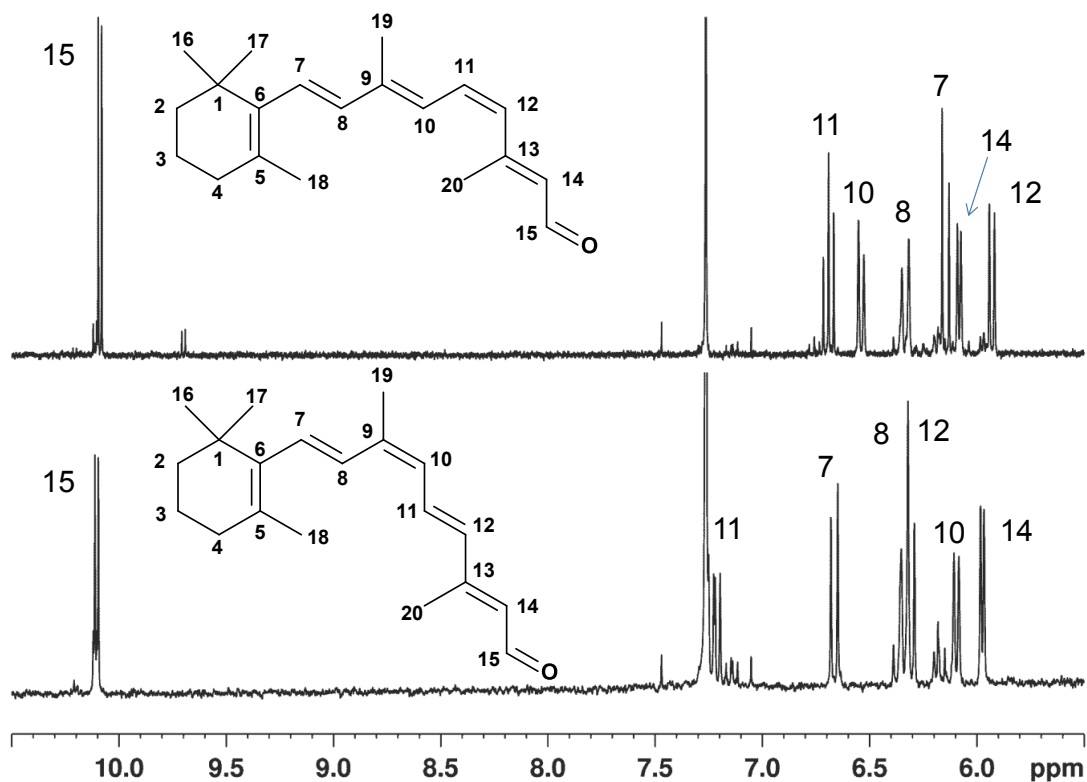

**Figure S4:** Low field portion of the 500 MHz <sup>1</sup>H-NMR spectra of 9-*cis*retinal (bottom) and 11-*cis*retinal (top) dissolved in CDCl<sub>3</sub>. Attribution of the six vinyl protons 7, 8, 10, 11, 12, and 14, as well as aldehyde proton 15 is indicated in the spectra, according to the numbering shown in the structures.

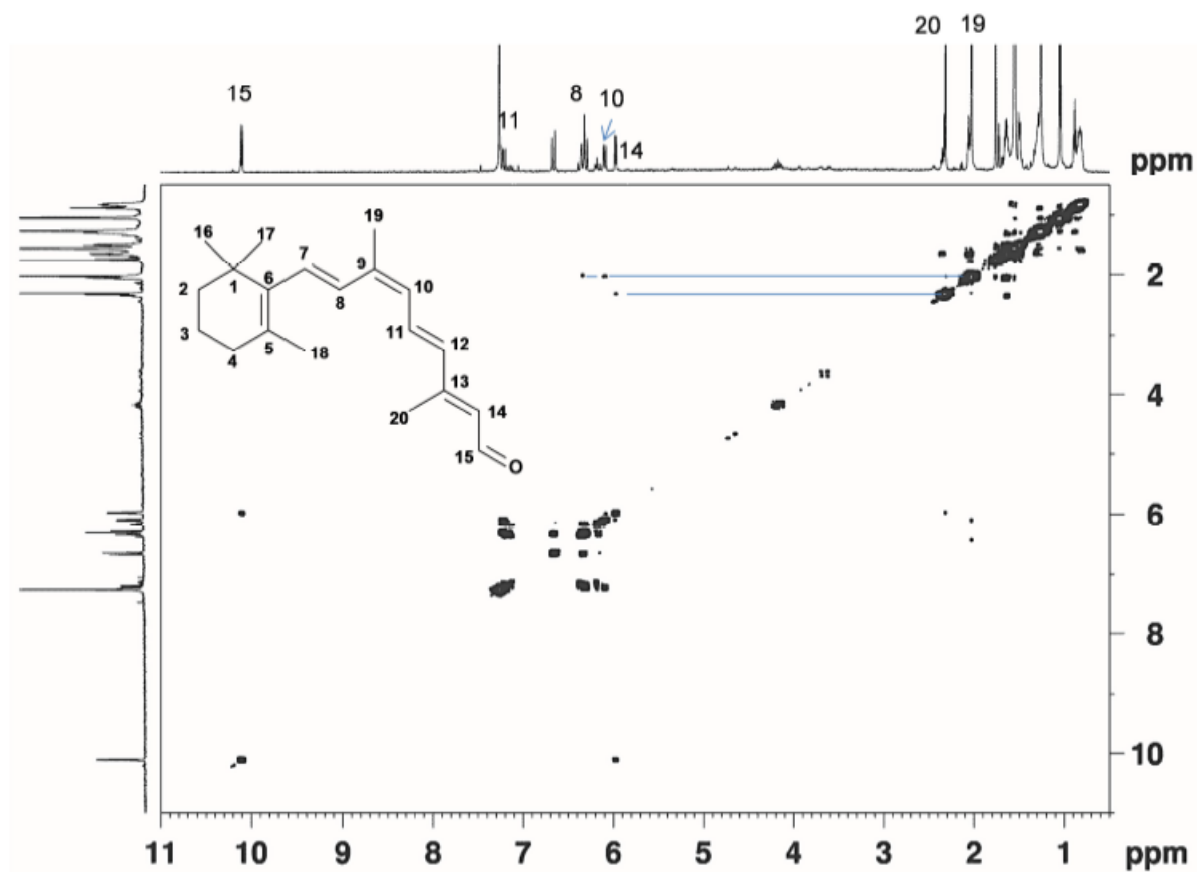

**Figure S5:** 500 MHz 2D  $^1\text{H}$ - $^1\text{H}$  COSY NMR spectrum of 9-cis retinal dissolved in  $\text{CDCl}_3$ . A partial attribution is indicated, with the decisive cross peaks for the final attribution showing the  $^4J_{\text{HH}}$  couplings between H-14 and  $\text{CH}_3$ -20, and between H-10, H-8 and  $\text{CH}_3$ -19, respectively, indicated by blue lines.

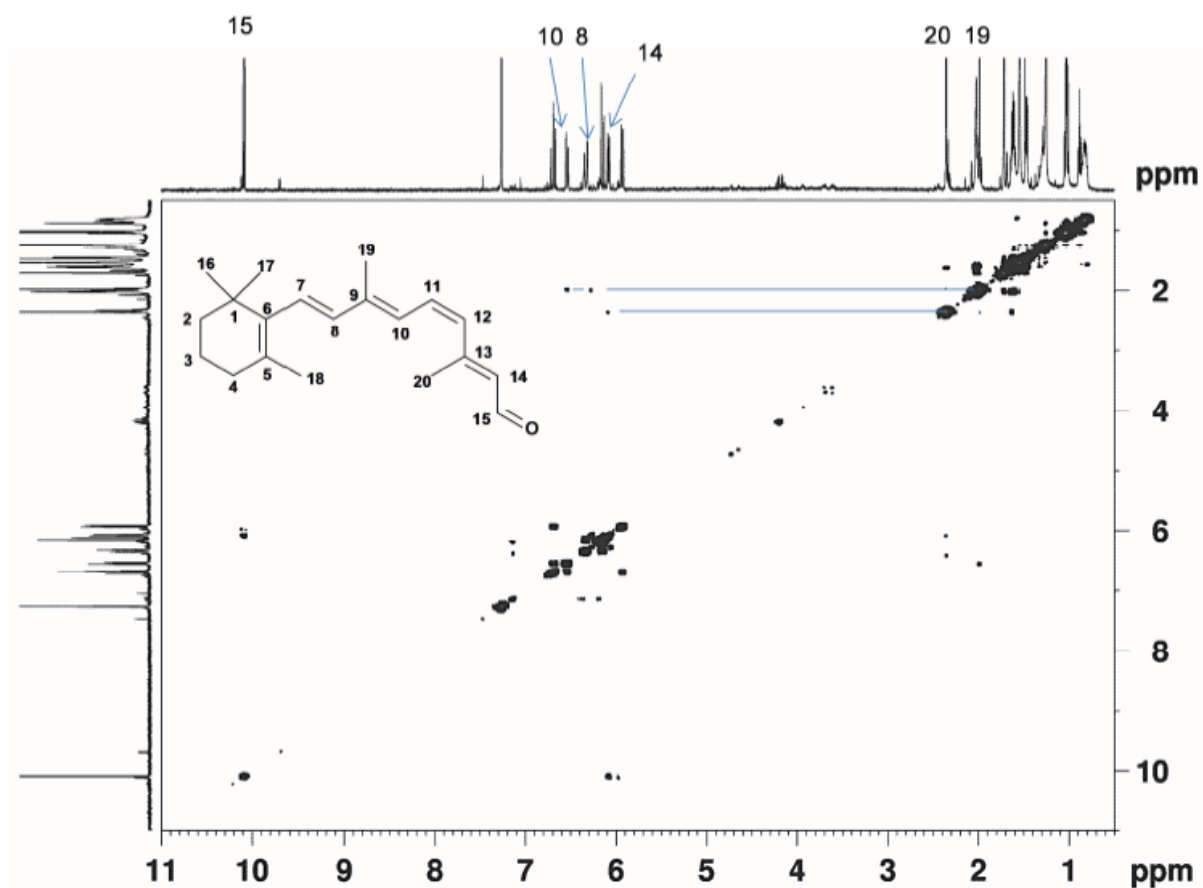

**Figure S6:** 500 MHz 2D  $^1\text{H}$ - $^1\text{H}$  COSY NMR spectrum of 11-cis retinal dissolved in  $\text{CDCl}_3$ . A partial attribution is indicated, with the decisive cross peaks for the final attribution showing the  $^4J_{\text{HH}}$  couplings between H-14 and  $\text{CH}_3$ -20, and between H-10, H-8 and  $\text{CH}_3$ -19, respectively, indicated by blue lines.



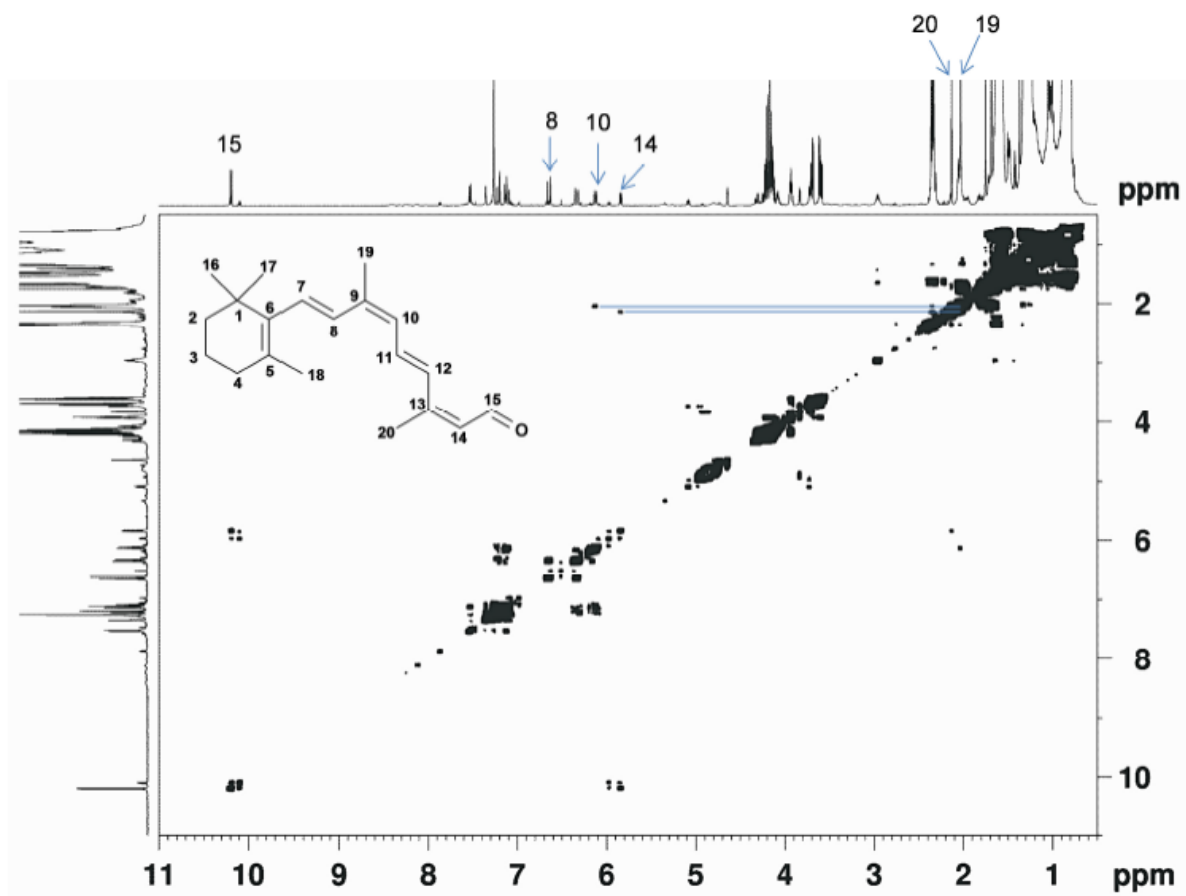

**Figure S7:** 500 MHz 2D  $^1\text{H}$ - $^1\text{H}$  COSY NMR spectrum of 9,13-dicis retinal dissolved in  $\text{CDCl}_3$ . A partial attribution is indicated, with the decisive cross peaks for the final attribution showing the  $^4J_{\text{HH}}$  couplings between H-14 and  $\text{CH}_3$ -20, and between H-10, H-8 and  $\text{CH}_3$ -19, respectively, indicated by blue lines.

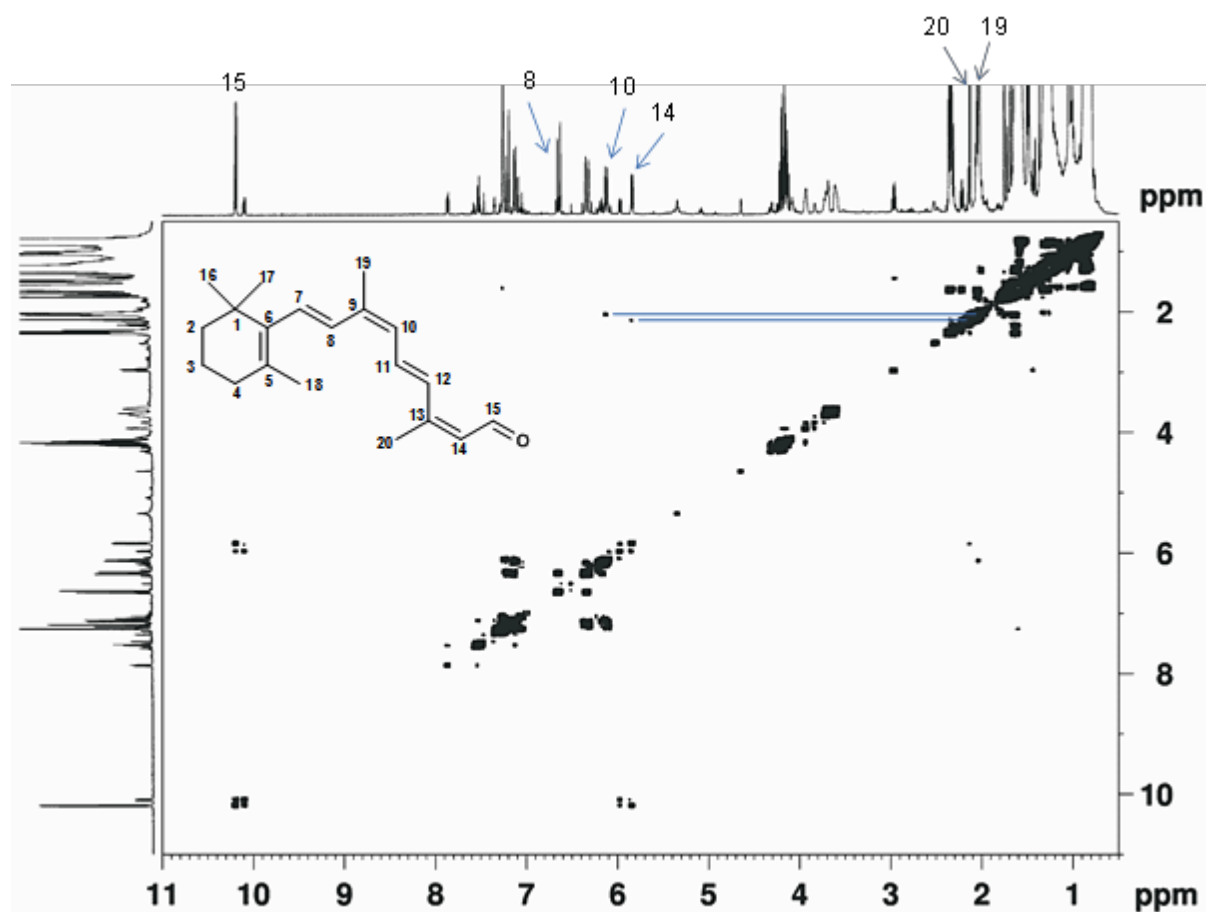

**Figure S8:** 500 MHz 2D  $^1\text{H}$ - $^1\text{H}$  COSY NMR spectrum of 9,13-*dicis*-retinal first treated in CRALBP with  $\text{D}_2\text{O}$  buffer and subsequently dissolved in  $\text{CDCl}_3$ . A partial attribution is indicated, with the decisive cross peaks for the final attribution showing the  $^4J_{\text{HH}}$  couplings between H-14 and  $\text{CH}_3$ -20, and between H-10, H-8 and  $\text{CH}_3$ -19, respectively, indicated by blue lines.

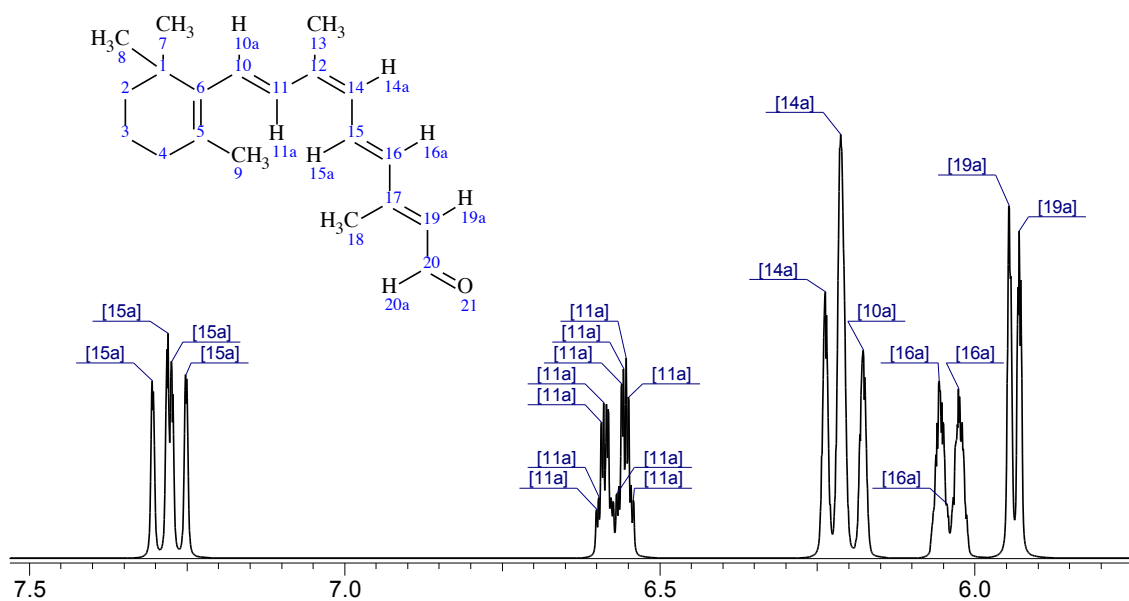

**Figure S9:** Low field part of the simulated 500 MHz  $^1\text{H-NMR}$  spectrum of 9-*cis*-retinal in  $\text{CDCl}_3$ . Attribution for the six vinyl protons 10, 11, 14, 15, 16, and 19 is indicated in the spectrum according to the numbering given in the structures. The spectrum was simulated with the H-NMR predictor tool of ACDLabs software, version 12.00.

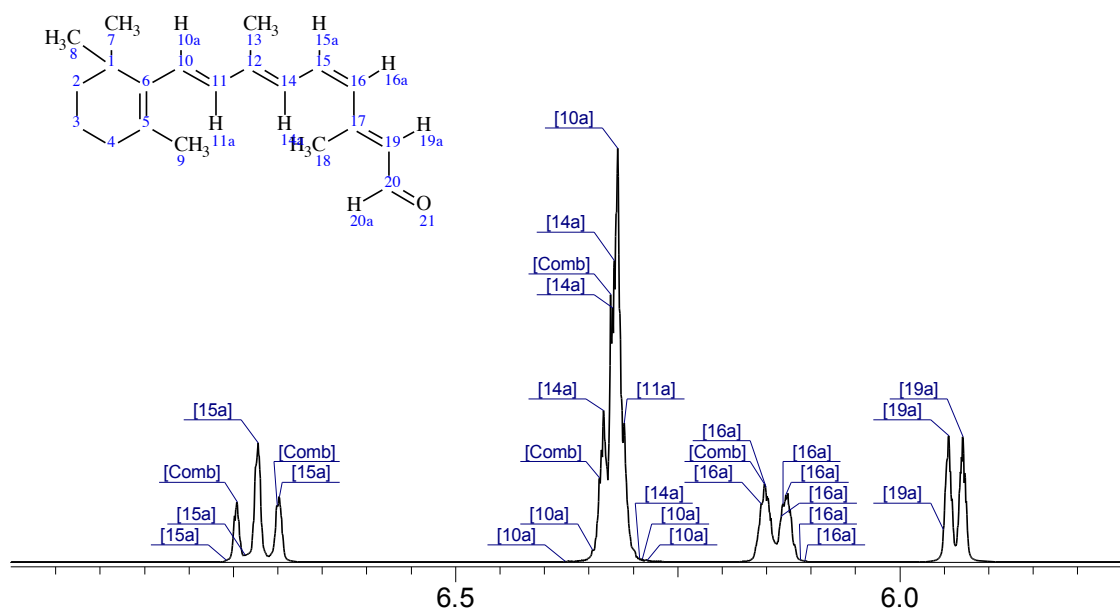

**Figure S10:** Low field part of the simulated 500 MHz  $^1\text{H-NMR}$  spectrum of 11-*cis*-retinal in  $\text{CDCl}_3$ . Attribution for the six vinyl protons 10, 11, 14, 15, 16, and 19 is indicated in the spectrum according to the numbering given in the structures. The spectrum was simulated with the H-NMR predictor tool of ACDLabs software, version 12.00.

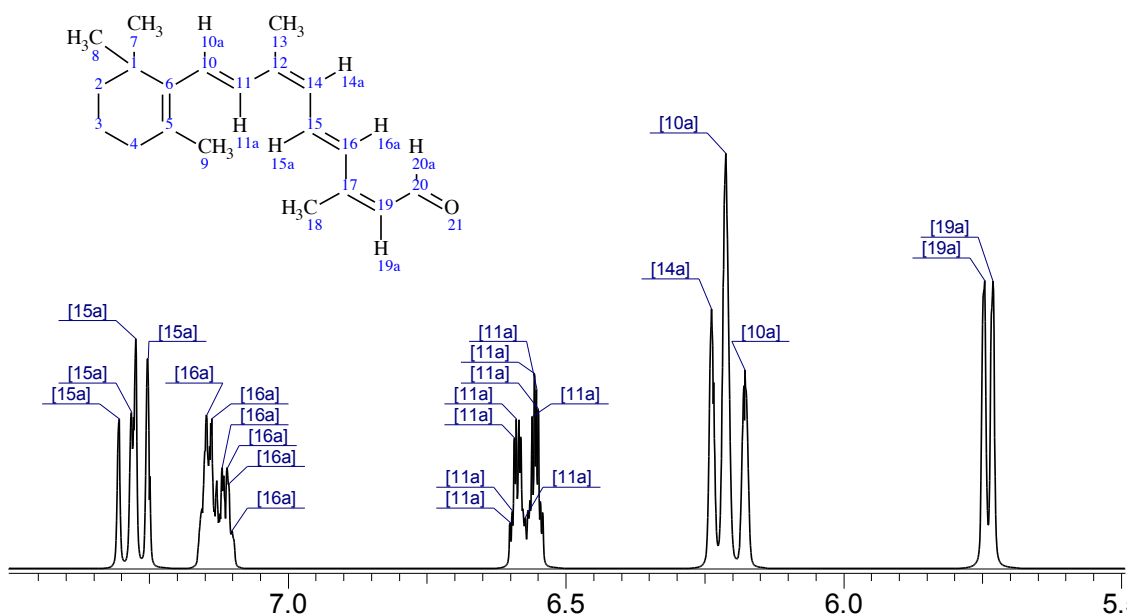

**Figure S11:** Low field part of the simulated 500 MHz  $^1\text{H}$ -NMR spectrum of 9,13-*dicis*-retinal in  $\text{CDCl}_3$ . Attribution for the six vinyl protons 10, 11, 14, 15, 16, and 19 is indicated in the spectrum according to the numbering given in the structures. The spectrum was simulated with the H-NMR predictor tool of ACDLabs software, version 12.00.

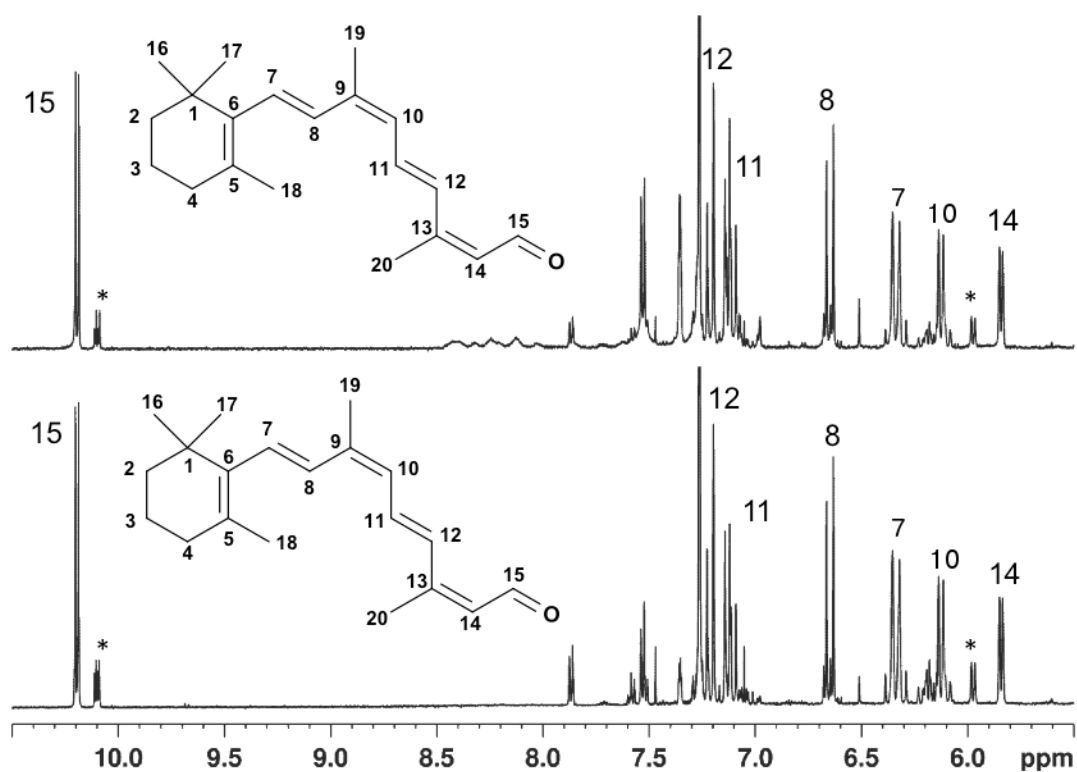

**Figure S12:** 500 MHz  $^1\text{H}$ -NMR spectra of 9,13-*dicis*-retinal first treated in aqueous buffer and subsequently dissolved in  $\text{CDCl}_3$  (top) and 9,13-*dicis*-retinal first treated in CRALBP with  $\text{D}_2\text{O}$  buffer and subsequently dissolved in  $\text{CDCl}_3$  (bottom). Attribution of the six vinyl protons 7, 8, 10, 11, 12, and 14, as well as of the aldehyde proton 15 is indicated in both spectra, according to the numbering given in the structures. A second set of resonances visible for protons 14 and 15, denoted with stars, indicates traces of residual 9-*cis*-retinal.

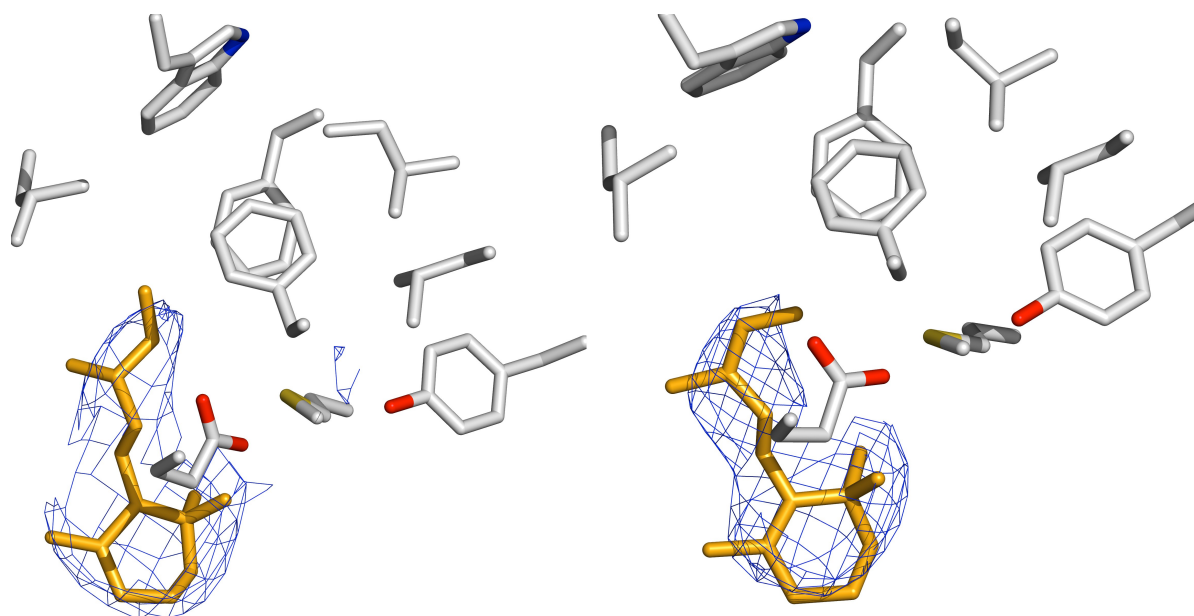

**Figure S13:** Close-up views of the ligand-binding pockets of WT CRALBP bound to A) 11-*cis*-retinal and to B) 9-*cis*-retinal. Side chains (gray) that form van der Waals contacts with the cis-retinoid tails (orange) or participate in hydrogen bonding within the ligand-binding pocket of the corresponding mutant R234W are shown as sticks. Electron densities of the ligands are shown as blue mesh at  $1 \sigma$  in the  $2F_o - F_c$  maps. Both ligands are truncated at C11 of the retinal due to a lack of electron density for the terminal tail region.

## COORDINATES OF CRALBP:9-CIS-RETINAL IN PDB FORMAT:

```

REMARK Date 2013-02-11 Time 17:11:23 CET +0100 (1360599083.81 s)
REMARK PHENIX refinement
REMARK
REMARK ***** INPUT FILES AND LABELS *****
REMARK Reflections:
REMARK   file name       :
/home/achim/Christin/GO_paraфин_5_20110514_143359/mtz/AutoMR_run_1_/neu_refine/para
fin_7_ccp4_179P6522.mtz
REMARK   labels         : ['F(+)_paraфин_7,SIGF(+)_paraфин_7,F(-)_paraфин_7,SIGF(-)
)_paraфин_7,merged']
REMARK R-free flags:
REMARK   file name       :
/home/achim/Christin/GO_paraфин_5_20110514_143359/mtz/AutoMR_run_1_/neu_refine/para
fin_7_ccp4_179P6522.mtz
REMARK   label           : FreeRflag
REMARK   test_flag_value: 0
REMARK Model file name(s):
REMARK
/home/achim/Christin/GO_paraфин_5_20110514_143359/mtz/AutoMR_run_1_/neu_refine/CRAL
BP_9cis_2_refine_7.pdb
REMARK
REMARK ***** REFINEMENT SUMMARY: QUICK FACTS *****
REMARK Start: r_work = 0.2452 r_free = 0.2668 bonds = 0.003 angles = 0.573
REMARK Final: r_work = 0.2340 r_free = 0.2649 bonds = 0.003 angles = 0.567
REMARK *****
REMARK ***** REFINEMENT STATISTICS STEP BY STEP *****
REMARK leading digit, like l_, means number of macro-cycle
REMARK 0      : statistics at the very beginning when nothing is done yet
REMARK l_bss: bulk solvent correction and/or (anisotropic) scaling
REMARK l_xyz: refinement of coordinates
REMARK l_adp: refinement of ADPs (Atomic Displacement Parameters)
REMARK -----
REMARK R-factors, x-ray target values and norm of gradient of x-ray target
REMARK stage  r-work r-free  xray_target_w  xray_target_t
REMARK 0      : 0.5160 0.3661  3.228334e+00  3.070849e+00
REMARK l_bss: 0.2452 0.2668  2.843660e+00  2.918574e+00
REMARK l_ohs: 0.2452 0.2668  2.843660e+00  2.918574e+00
REMARK l_xyz: 0.2410 0.2656  2.838991e+00  2.925293e+00
REMARK l_adp: 0.2325 0.2651  2.809048e+00  2.901824e+00
REMARK l_bss: 0.2340 0.2649  2.814870e+00  2.907498e+00
REMARK l_ohs: 0.2340 0.2649  2.814870e+00  2.907498e+00
REMARK -----
REMARK stage  k_sol  b_sol    b11    b22    b33    b12    b13    b23
REMARK 0      : 0.000  0.000    0.000  0.000  0.000  0.000  0.000  0.000
REMARK l_bss: 0.330 129.350  9.231  9.231 -18.461 -0.000 -0.000 -0.000
REMARK l_ohs: 0.330 129.350  9.231  9.231 -18.461 -0.000 -0.000 -0.000
REMARK l_xyz: 0.330 129.350  9.231  9.231 -18.461 -0.000 -0.000 -0.000
REMARK l_adp: 0.330 129.350  9.231  9.231 -18.461 -0.000 -0.000 -0.000
REMARK l_bss: 0.332 126.805  8.861  8.861 -17.722 -0.000 -0.000 -0.000
REMARK l_ohs: 0.332 126.805  8.861  8.861 -17.722 -0.000 -0.000 -0.000
REMARK -----
REMARK stage  <pher>  fom    alpha    beta
REMARK 0      : 38.530 0.6574  0.0600  144.086
REMARK l_bss: 30.475 0.7464  0.0732   75.610
REMARK l_ohs: 30.475 0.7464  0.0732   75.610
REMARK l_xyz: 31.455 0.7348  0.0721   76.788
REMARK l_adp: 30.282 0.7482  0.0747   77.192
REMARK l_bss: 30.344 0.7478  0.0733   78.249
REMARK l_ohs: 30.344 0.7478  0.0733   78.249
REMARK -----
REMARK stage  angl  bond  chir  dihe  plan  repu  geom_target
REMARK 0      : 0.573 0.003 0.042 10.538 0.003 4.116 4.2141e-02
REMARK l_bss: 0.573 0.003 0.042 10.538 0.003 4.116 4.2141e-02
REMARK l_ohs: 0.573 0.003 0.042 10.538 0.003 4.116 4.2141e-02
REMARK l_xyz: 0.567 0.003 0.042 10.840 0.003 4.117 4.0389e-02

```

```

REMARK 1_adp: 0.567 0.003 0.042 10.840 0.003 4.117 4.0389e-02
REMARK 1_bss: 0.567 0.003 0.042 10.840 0.003 4.117 4.0389e-02
REMARK 1_ohs: 0.567 0.003 0.042 10.840 0.003 4.117 4.0389e-02
-----
REMARK
REMARK Maximal deviations:
REMARK stage angl bond chir dihe plan repu |grad|
REMARK 0 : 5.417 0.053 0.208 55.364 0.045 2.221 1.9546e-02
REMARK 1_bss: 5.417 0.053 0.208 55.364 0.045 2.221 1.9546e-02
REMARK 1_ohs: 5.417 0.053 0.208 55.364 0.045 2.221 1.9546e-02
REMARK 1_xyz: 5.725 0.052 0.218 55.746 0.042 2.247 1.7124e-02
REMARK 1_adp: 5.725 0.052 0.218 55.746 0.042 2.247 1.7124e-02
REMARK 1_bss: 5.725 0.052 0.218 55.746 0.042 2.247 1.7124e-02
REMARK 1_ohs: 5.725 0.052 0.218 55.746 0.042 2.247 1.7124e-02
-----
REMARK
REMARK |-----overall-----|---macromolecule---|-----solvent-----|
REMARK stage b_max b_min b_ave b_max b_min b_ave b_max b_min b_ave
REMARK 0 : 295.16 19.19 170.08 295.16 19.19 170.15 149.33 117.19 130.43
REMARK 1_bss: 298.46 22.49 173.38 298.46 22.49 173.45 152.63 120.49 133.74
REMARK 1_ohs: 298.46 22.49 173.38 298.46 22.49 173.45 152.63 120.49 133.74
REMARK 1_xyz: 298.46 22.49 173.38 298.46 22.49 173.45 152.63 120.49 133.74
REMARK 1_adp: 293.47 88.11 172.76 293.47 88.11 172.86 122.63 103.93 114.51
REMARK 1_bss: 291.43 88.11 170.90 291.43 88.11 171.00 120.59 101.89 112.47
REMARK 1_ohs: 291.43 88.11 170.90 291.43 88.11 171.00 120.59 101.89 112.47
-----
REMARK
REMARK stage Deviation of refined
REMARK model from start model
REMARK max min mean
REMARK 0 : 0.000 0.000 0.000
REMARK 1_bss: 0.000 0.000 0.000
REMARK 1_ohs: 0.000 0.000 0.000
REMARK 1_xyz: 1.067 0.000 0.022
REMARK 1_adp: 1.067 0.000 0.022
REMARK 1_bss: 1.067 0.000 0.022
REMARK 1_ohs: 1.067 0.000 0.022
-----
REMARK
REMARK MODEL CONTENT.
REMARK ELEMENT ATOM RECORD COUNT OCCUPANCY SUM
REMARK C 1498 1498.00
REMARK S 9 9.00
REMARK O 445 445.00
REMARK N 393 393.00
REMARK TOTAL 2345 2345.00
-----
REMARK
REMARK r_free_flags.md5.hexdigest d8954dc2614156da0d4e4c38b65168d2
REMARK
REMARK IF THIS FILE IS FOR PDB DEPOSITION: REMOVE ALL FROM THIS LINE UP.
REMARK 3
REMARK 3 REFINEMENT.
REMARK 3 PROGRAM : PHENIX (phenix.refine: 1.7.3_928)
REMARK 3 AUTHORS : Adams,Afonine,Chen,Davis,Echols,Gildea,Gopal,
REMARK 3 : Grosse-Kunstleve,Headd,Hung,Immormino,Ioerger,McCoy,
REMARK 3 : McKee,Moriarty,Pai,Read,Richardson,Richardson,Romo,
REMARK 3 : Sacchettini,Sauter,Smith,Storoni,Terwilliger,Zwart
REMARK 3
REMARK 3 REFINEMENT TARGET : ML
REMARK 3
REMARK 3 DATA USED IN REFINEMENT.
REMARK 3 RESOLUTION RANGE HIGH (ANGSTROMS) : 3.403
REMARK 3 RESOLUTION RANGE LOW (ANGSTROMS) : 47.356
REMARK 3 MIN(FOBS/SIGMA_FOBS) : 1.99
REMARK 3 COMPLETENESS FOR RANGE (%) : 99.62
REMARK 3 NUMBER OF REFLECTIONS : 11423
REMARK 3 NUMBER OF REFLECTIONS (NON-ANOMALOUS) : 6704
REMARK 3
REMARK 3 FIT TO DATA USED IN REFINEMENT.
REMARK 3 R VALUE (WORKING + TEST SET) : 0.2356
REMARK 3 R VALUE (WORKING SET) : 0.2340
REMARK 3 FREE R VALUE : 0.2649
REMARK 3 FREE R VALUE TEST SET SIZE (%) : 5.04
REMARK 3 FREE R VALUE TEST SET COUNT : 576

```



```

REMARK 3
REMARK 3 FIT TO DATA USED IN REFINEMENT (IN BINS).
REMARK 3 BIN RESOLUTION RANGE COMPL. NWORK NFREE RWORK RFREE
REMARK 3 1 47.3604 - 5.3993 1.00 2718 143 0.2055 0.2509
REMARK 3 2 5.3993 - 4.2864 1.00 2739 148 0.2087 0.2321
REMARK 3 3 4.2864 - 3.7449 1.00 2696 143 0.2730 0.2424
REMARK 3 4 3.7449 - 3.4026 0.99 2694 142 0.3528 0.4424
REMARK 3
REMARK 3 BULK SOLVENT MODELLING.
REMARK 3 METHOD USED : FLAT BULK SOLVENT MODEL
REMARK 3 SOLVENT RADIUS : 1.11
REMARK 3 SHRINKAGE RADIUS : 0.90
REMARK 3 GRID STEP FACTOR : 4.00
REMARK 3 K_SOL : 0.332
REMARK 3 B_SOL : 126.805
REMARK 3
REMARK 3 ERROR ESTIMATES.
REMARK 3 COORDINATE ERROR (MAXIMUM-LIKELIHOOD BASED) : 0.55
REMARK 3 PHASE ERROR (DEGREES, MAXIMUM-LIKELIHOOD BASED) : 30.34
REMARK 3
REMARK 3 OVERALL SCALE FACTORS.
REMARK 3 SCALE = SUM(|F_OBS|*|F_MODEL|)/SUM(|F_MODEL|**2) : 0.0812
REMARK 3 ANISOTROPIC SCALE MATRIX ELEMENTS (IN CARTESIAN BASIS).
REMARK 3 B11 : 8.8611
REMARK 3 B22 : 8.8611
REMARK 3 B33 : -17.7223
REMARK 3 B12 : -0.0000
REMARK 3 B13 : -0.0000
REMARK 3 B23 : -0.0000
REMARK 3
REMARK 3 R FACTOR FORMULA.
REMARK 3 R = SUM(|F_OBS|-SCALE*|F_MODEL|)/SUM(|F_OBS|)
REMARK 3
REMARK 3 TOTAL MODEL STRUCTURE FACTOR (F_MODEL).
REMARK 3 F_MODEL = FB_CART * (F_CALC_ATOMS + F_BULK)
REMARK 3 F_BULK = K_SOL * EXP(-B_SOL * S**2 / 4) * F_MASK
REMARK 3 F_CALC_ATOMS = ATOMIC MODEL STRUCTURE FACTORS
REMARK 3 FB_CART = EXP(-H(t) * A(-1) * B * A(-1t) * H)
REMARK 3 A = orthogonalization matrix, H = MILLER INDEX
REMARK 3 (t) = TRANSPOSE, (-1) = INVERSE
REMARK 3
REMARK 3 STRUCTURE FACTORS CALCULATION ALGORITHM : FFT
REMARK 3
REMARK 3 DEVIATIONS FROM IDEAL VALUES.
REMARK 3 RMSD MAX COUNT
REMARK 3 BOND : 0.003 0.052 2391
REMARK 3 ANGLE : 0.567 5.725 3227
REMARK 3 CHIRALITY : 0.042 0.218 340
REMARK 3 PLANARITY : 0.003 0.042 422
REMARK 3 DIHEDRAL : 10.840 55.746 923
REMARK 3 MIN NONBONDED DISTANCE : 2.247
REMARK 3
REMARK 3 MOLPROBITY STATISTICS.
REMARK 3 ALL-ATOM CLASHSCORE : 16.41
REMARK 3 RAMACHANDRAN PLOT:
REMARK 3 OUTLIERS : 1.42 %
REMARK 3 ALLOWED : 6.03 %
REMARK 3 FAVORED : 92.55 %
REMARK 3 ROTAMER OUTLIERS : 2.41 %
REMARK 3 CBETA DEVIATIONS : 0
REMARK 3
REMARK 3 ATOMIC DISPLACEMENT PARAMETERS.
REMARK 3 WILSON B : 115.51
REMARK 3 RMS(B_ISO_OR_EQUIVALENT_BONDED) : 9.61
REMARK 3 ATOMS NUMBER OF ATOMS
REMARK 3 ISO. ANISO.
REMARK 3 ALL : 2345 2317
REMARK 3 ALL (NO H) : 2345 2317
REMARK 3 SOLVENT : 4 0
REMARK 3 NON-SOLVENT : 2341 2317

```

```

REMARK 3      HYDROGENS      :      0      0
REMARK 3
REMARK 3  TLS DETAILS.
REMARK 3  NUMBER OF TLS GROUPS: 9
REMARK 3  ORIGIN: CENTER OF MASS
REMARK 3  TLS GROUP : 1
REMARK 3  SELECTION: (chain A and resid 23:41)
REMARK 3  ORIGIN FOR THE GROUP (A): -5.5918  37.6017  27.3286
REMARK 3  T TENSOR
REMARK 3    T11:  2.1994 T22:  1.9958
REMARK 3    T33:  1.4079 T12: -0.4736
REMARK 3    T13: -0.0411 T23: -0.5562
REMARK 3  L TENSOR
REMARK 3    L11:  7.8860 L22:  4.5901
REMARK 3    L33:  9.6221 L12:  0.9865
REMARK 3    L13: -0.5561 L23:  1.5253
REMARK 3  S TENSOR
REMARK 3    S11:  0.3000 S12: -0.3177 S13:  0.0568
REMARK 3    S21:  0.8084 S22: -0.1019 S23: -0.4012
REMARK 3    S31: -0.8162 S32: -0.9783 S33: -0.2458
REMARK 3  TLS GROUP : 2
REMARK 3  SELECTION: (chain A and resid 42:55)
REMARK 3  ORIGIN FOR THE GROUP (A): -11.8415  30.7911  36.6263
REMARK 3  T TENSOR
REMARK 3    T11:  2.9085 T22:  1.9403
REMARK 3    T33:  1.6348 T12: -0.4593
REMARK 3    T13:  0.1605 T23: -0.3218
REMARK 3  L TENSOR
REMARK 3    L11:  2.0519 L22:  6.9728
REMARK 3    L33:  2.0070 L12: -3.4712
REMARK 3    L13:  3.1137 L23:  5.5738
REMARK 3  S TENSOR
REMARK 3    S11:  1.5039 S12: -1.2444 S13:  1.4686
REMARK 3    S21:  1.2691 S22:  0.8299 S23: -0.9692
REMARK 3    S31: -1.3234 S32:  0.0174 S33: -2.2895
REMARK 3  TLS GROUP : 3
REMARK 3  SELECTION: (chain A and resid 56:85)
REMARK 3  ORIGIN FOR THE GROUP (A): -0.1189  11.7135  42.8589
REMARK 3  T TENSOR
REMARK 3    T11:  1.3719 T22:  3.0648
REMARK 3    T33:  1.6220 T12: -0.6570
REMARK 3    T13: -0.2950 T23:  0.3508
REMARK 3  L TENSOR
REMARK 3    L11:  8.3400 L22:  9.6397
REMARK 3    L33:  2.1893 L12: -4.2700
REMARK 3    L13:  1.3293 L23: -2.8757
REMARK 3  S TENSOR
REMARK 3    S11:  0.8681 S12: -2.2281 S13: -0.8490
REMARK 3    S21:  0.6311 S22: -1.3826 S23:  0.4318
REMARK 3    S31:  0.0217 S32:  0.9134 S33:  0.5386
REMARK 3  TLS GROUP : 4
REMARK 3  SELECTION: (chain A and resid 86:98)
REMARK 3  ORIGIN FOR THE GROUP (A):  6.5679  16.8040  36.9401
REMARK 3  T TENSOR
REMARK 3    T11:  1.5295 T22:  2.6147
REMARK 3    T33:  1.6530 T12: -1.0821
REMARK 3    T13: -0.3277 T23:  0.3613
REMARK 3  L TENSOR
REMARK 3    L11:  2.9372 L22:  9.4653
REMARK 3    L33:  7.7546 L12:  1.2980
REMARK 3    L13: -1.2829 L23:  5.8943
REMARK 3  S TENSOR
REMARK 3    S11:  0.0330 S12: -0.2465 S13: -0.0152
REMARK 3    S21: -0.3899 S22:  0.2387 S23: -1.0539
REMARK 3    S31: -0.4196 S32:  1.4365 S33: -0.4623
REMARK 3  TLS GROUP : 5
REMARK 3  SELECTION: (chain A and resid 99:143)
REMARK 3  ORIGIN FOR THE GROUP (A):  3.5602  14.7805  25.7713
REMARK 3  T TENSOR
REMARK 3    T11:  1.4786 T22:  1.6464

```

```

REMARK 3      T33:   1.6775 T12:  -0.5713
REMARK 3      T13:  -0.3221 T23:   0.1994
REMARK 3      L TENSOR
REMARK 3      L11:   1.2314 L22:   4.6137
REMARK 3      L33:   5.1821 L12:   1.7657
REMARK 3      L13:  -0.6364 L23:  -0.4875
REMARK 3      S TENSOR
REMARK 3      S11:   0.4016 S12:  -1.3190 S13:  -1.1200
REMARK 3      S21:  -0.0972 S22:  -1.2266 S23:  -1.6078
REMARK 3      S31:  -1.3717 S32:   1.7076 S33:   0.7275
REMARK 3      TLS GROUP : 6
REMARK 3      SELECTION: (chain A and resid 144:185)
REMARK 3      ORIGIN FOR THE GROUP (A):   2.1584  23.4104  13.0419
REMARK 3      T TENSOR
REMARK 3      T11:   1.5470 T22:   1.3685
REMARK 3      T33:   1.3940 T12:  -0.6263
REMARK 3      T13:  -0.2859 T23:   0.0245
REMARK 3      L TENSOR
REMARK 3      L11:   4.8858 L22:  10.0185
REMARK 3      L33:   9.2610 L12:  -1.4558
REMARK 3      L13:  -0.9991 L23:   1.5010
REMARK 3      S TENSOR
REMARK 3      S11:  -0.2844 S12:  -0.1394 S13:   0.5531
REMARK 3      S21:  -1.0291 S22:  -1.0833 S23:  -0.9428
REMARK 3      S31:  -1.7490 S32:   1.1707 S33:   1.1957
REMARK 3      TLS GROUP : 7
REMARK 3      SELECTION: (chain A and resid 186:255)
REMARK 3      ORIGIN FOR THE GROUP (A):  -5.0786  18.1984  12.8337
REMARK 3      T TENSOR
REMARK 3      T11:   1.8375 T22:   1.1086
REMARK 3      T33:   1.1457 T12:  -0.7763
REMARK 3      T13:  -0.1863 T23:  -0.0705
REMARK 3      L TENSOR
REMARK 3      L11:   3.2540 L22:   8.2616
REMARK 3      L33:   5.7362 L12:  -0.0841
REMARK 3      L13:  -1.1440 L23:   1.3476
REMARK 3      S TENSOR
REMARK 3      S11:   0.2582 S12:  -0.1726 S13:  -0.3769
REMARK 3      S21:  -1.4528 S22:  -1.2033 S23:  -0.7484
REMARK 3      S31:  -1.3196 S32:   1.2170 S33:   0.5800
REMARK 3      TLS GROUP : 8
REMARK 3      SELECTION: (chain A and resid 256:295)
REMARK 3      ORIGIN FOR THE GROUP (A): -10.7649  27.5537  11.1747
REMARK 3      T TENSOR
REMARK 3      T11:   2.0082 T22:   0.9124
REMARK 3      T33:   1.4094 T12:  -0.3464
REMARK 3      T13:  -0.2966 T23:  -0.1683
REMARK 3      L TENSOR
REMARK 3      L11:   2.8904 L22:   9.8943
REMARK 3      L33:   2.6632 L12:   2.9399
REMARK 3      L13:  -0.4110 L23:  -2.8237
REMARK 3      S TENSOR
REMARK 3      S11:  -0.0025 S12:  -0.1289 S13:   0.7631
REMARK 3      S21:   0.2197 S22:  -0.3207 S23:   0.6423
REMARK 3      S31:  -1.5326 S32:  -0.2329 S33:   0.2759
REMARK 3      TLS GROUP : 9
REMARK 3      SELECTION: (chain A and resid 296:306)
REMARK 3      ORIGIN FOR THE GROUP (A):  10.0979  32.3403  15.3244
REMARK 3      T TENSOR
REMARK 3      T11:   3.3329 T22:   1.1558
REMARK 3      T33:   1.9624 T12:  -2.8554
REMARK 3      T13:   0.2941 T23:  -0.2076
REMARK 3      L TENSOR
REMARK 3      L11:   2.7005 L22:   4.7888
REMARK 3      L33:   4.1568 L12:   0.7439
REMARK 3      L13:  -0.3794 L23:   0.7100
REMARK 3      S TENSOR
REMARK 3      S11:  -0.9161 S12:  -0.1066 S13:  -0.2602
REMARK 3      S21:  -0.0904 S22:  -0.9511 S23:  -0.6308
REMARK 3      S31:   0.1489 S32:   1.0875 S33:   1.0744

```

|        |          |          |          |       |       |          |          |        |                  |   |
|--------|----------|----------|----------|-------|-------|----------|----------|--------|------------------|---|
| REMARK | 3        |          |          |       |       |          |          |        |                  |   |
| CRYST1 | 70.556   | 70.556   | 299.747  | 90.00 | 90.00 | 120.00   | P 65 2 2 |        |                  |   |
| SCALE1 | 0.014173 | 0.008183 | 0.000000 |       |       | 0.000000 |          |        |                  |   |
| SCALE2 | 0.000000 | 0.016366 | 0.000000 |       |       | 0.000000 |          |        |                  |   |
| SCALE3 | 0.000000 | 0.000000 | 0.003336 |       |       | 0.000000 |          |        |                  |   |
| ATOM   | 1        | N        | GLU      | A     | 23    | -20.270  | 35.716   | 25.731 | 1.00243.58       | N |
| ANISOU | 1        | N        | GLU      | A     | 23    | 29539    | 39670    | 23339  | -3571 1423 -6245 | N |
| ATOM   | 2        | CA       | GLU      | A     | 23    | -19.742  | 36.514   | 24.632 | 1.00249.26       | C |
| ANISOU | 2        | CA       | GLU      | A     | 23    | 30433    | 40064    | 24212  | -3018 1228 -6150 | C |
| ATOM   | 3        | C        | GLU      | A     | 23    | -19.157  | 37.825   | 25.158 | 1.00262.55       | C |
| ANISOU | 3        | C        | GLU      | A     | 23    | 32687    | 41126    | 25946  | -2402 1247 -6075 | C |
| ATOM   | 4        | O        | GLU      | A     | 23    | -18.582  | 37.856   | 26.247 | 1.00269.76       | O |
| ANISOU | 4        | O        | GLU      | A     | 23    | 34039    | 41553    | 26904  | -2608 1307 -6077 | O |
| ATOM   | 5        | CB       | GLU      | A     | 23    | -20.838  | 36.786   | 23.599 | 1.00249.01       | C |
| ANISOU | 5        | CB       | GLU      | A     | 23    | 29731    | 40926    | 23956  | -2590 1203 -6227 | C |
| ATOM   | 6        | CG       | GLU      | A     | 23    | -20.351  | 36.798   | 22.157 | 1.00242.83       | C |
| ANISOU | 6        | CG       | GLU      | A     | 23    | 28962    | 40012    | 23289  | -2489 965 -6121  | C |
| ATOM   | 7        | CD       | GLU      | A     | 23    | -21.487  | 36.931   | 21.163 | 1.00244.81       | C |
| ANISOU | 7        | CD       | GLU      | A     | 23    | 28494    | 41278    | 23244  | -2132 897 -6194  | C |
| ATOM   | 8        | OE1      | GLU      | A     | 23    | -22.659  | 36.931   | 21.596 | 1.00250.61       | O |
| ANISOU | 8        | OE1      | GLU      | A     | 23    | 28655    | 42841    | 23723  | -2004 1037 -6353 | O |
| ATOM   | 9        | OE2      | GLU      | A     | 23    | -21.209  | 37.034   | 19.950 | 1.00241.71       | O |
| ANISOU | 9        | OE2      | GLU      | A     | 23    | 28079    | 40916    | 22843  | -1986 702 -6098  | O |
| ATOM   | 10       | N        | GLN      | A     | 24    | -19.307  | 38.896   | 24.381 | 1.00266.93       | N |
| ANISOU | 10       | N        | GLN      | A     | 24    | 33253    | 41690    | 26477  | -1667 1186 -6005 | N |
| ATOM   | 11       | CA       | GLN      | A     | 24    | -18.817  | 40.224   | 24.755 | 1.00269.42       | C |
| ANISOU | 11       | CA       | GLN      | A     | 24    | 34141    | 41359    | 26868  | -1058 1217 -5950 | C |
| ATOM   | 12       | C        | GLN      | A     | 24    | -17.322  | 40.238   | 25.076 | 1.00267.03       | C |
| ANISOU | 12       | C        | GLN      | A     | 24    | 34538    | 40057    | 26864  | -1433 1111 -5854 | C |
| ATOM   | 13       | O        | GLN      | A     | 24    | -16.907  | 40.759   | 26.112 | 1.00267.06       | O |
| ANISOU | 13       | O        | GLN      | A     | 24    | 34982    | 39605    | 26885  | -1387 1192 -5936 | O |
| ATOM   | 14       | CB       | GLN      | A     | 24    | -19.615  | 40.785   | 25.938 | 1.00271.98       | C |
| ANISOU | 14       | CB       | GLN      | A     | 24    | 34393    | 41988    | 26959  | -697 1465 -6163  | C |
| ATOM   | 15       | CG       | GLN      | A     | 24    | -21.116  | 40.868   | 25.703 | 1.00275.64       | C |
| ANISOU | 15       | CG       | GLN      | A     | 24    | 34089    | 43516    | 27125  | -249 1590 -6297  | C |
| ATOM   | 16       | CD       | GLN      | A     | 24    | -21.872  | 41.349   | 26.927 | 1.00277.70       | C |
| ANISOU | 16       | CD       | GLN      | A     | 24    | 34239    | 44130    | 27146  | 71 1884 -6565    | C |
| ATOM   | 17       | OE1      | GLN      | A     | 24    | -21.272  | 41.689   | 27.947 | 1.00276.55       | O |
| ANISOU | 17       | OE1      | GLN      | A     | 24    | 34644    | 43404    | 27028  | -20 1987 -6655   | O |
| ATOM   | 18       | NE2      | GLN      | A     | 24    | -23.196  | 41.378   | 26.832 | 1.00279.96       | N |
| ANISOU | 18       | NE2      | GLN      | A     | 24    | 33770    | 45436    | 27166  | 442 2023 -6727   | N |
| ATOM   | 19       | N        | LEU      | A     | 25    | -16.518  | 39.669   | 24.182 | 1.00262.19       | N |
| ANISOU | 19       | N        | LEU      | A     | 25    | 33990    | 39164    | 26468  | -1803 932 -5719  | N |
| ATOM   | 20       | CA       | LEU      | A     | 25    | -15.076  | 39.602   | 24.390 | 1.00251.94       | C |
| ANISOU | 20       | CA       | LEU      | A     | 25    | 33237    | 37018    | 25468  | -2168 818 -5646  | C |
| ATOM   | 21       | C        | LEU      | A     | 25    | -14.325  | 39.768   | 23.071 | 1.00249.47       | C |
| ANISOU | 21       | C        | LEU      | A     | 25    | 33035    | 36413    | 25341  | -2135 680 -5483  | C |
| ATOM   | 22       | O        | LEU      | A     | 25    | -14.667  | 39.137   | 22.070 | 1.00249.54       | O |
| ANISOU | 22       | O        | LEU      | A     | 25    | 32642    | 36877    | 25295  | -2252 619 -5464  | O |
| ATOM   | 23       | CB       | LEU      | A     | 25    | -14.695  | 38.273   | 25.048 | 1.00240.47       | C |
| ANISOU | 23       | CB       | LEU      | A     | 25    | 31730    | 35526    | 24112  | -2902 769 -5699  | C |
| ATOM   | 24       | CG       | LEU      | A     | 25    | -13.338  | 38.215   | 25.752 | 1.00227.33       | C |
| ANISOU | 24       | CG       | LEU      | A     | 25    | 30587    | 33096    | 22692  | -3227 650 -5661  | C |
| ATOM   | 25       | CD1      | LEU      | A     | 25    | -13.320  | 39.178   | 26.925 | 1.00222.10       | C |
| ANISOU | 25       | CD1      | LEU      | A     | 25    | 30298    | 32205    | 21884  | -2966 746 -5748  | C |
| ATOM   | 26       | CD2      | LEU      | A     | 25    | -13.033  | 36.801   | 26.215 | 1.00226.26       | C |
| ANISOU | 26       | CD2      | LEU      | A     | 25    | 30365    | 32942    | 22661  | -3876 563 -5646  | C |
| ATOM   | 27       | N        | THR      | A     | 26    | -13.303  | 40.619   | 23.075 | 1.00245.22       | N |
| ANISOU | 27       | N        | THR      | A     | 26    | 33033    | 35149    | 24990  | -2023 647 -5388  | N |
| ATOM   | 28       | CA       | THR      | A     | 26    | -12.527  | 40.885   | 21.867 | 1.00239.64       | C |
| ANISOU | 28       | CA       | THR      | A     | 26    | 32470    | 34158    | 24424  | -2021 564 -5214  | C |
| ATOM   | 29       | C        | THR      | A     | 26    | -11.240  | 40.065   | 21.822 | 1.00220.29       | C |
| ANISOU | 29       | C        | THR      | A     | 26    | 30128    | 31303    | 22271  | -2641 455 -5255  | C |
| ATOM   | 30       | O        | THR      | A     | 26    | -10.913  | 39.348   | 22.767 | 1.00212.86       | O |
| ANISOU | 30       | O        | THR      | A     | 26    | 29206    | 30229    | 21441  | -3024 409 -5376  | O |
| ATOM   | 31       | CB       | THR      | A     | 26    | -12.180  | 42.381   | 21.730 | 1.00251.30       | C |
| ANISOU | 31       | CB       | THR      | A     | 26    | 34471    | 35075    | 25935  | -1544 622 -5056  | C |
| ATOM   | 32       | OG1      | THR      | A     | 26    | -11.322  | 42.778   | 22.806 | 1.00255.94       | O |
| ANISOU | 32       | OG1      | THR      | A     | 26    | 35531    | 35004    | 26710  | -1751 639 -5170  | O |
| ATOM   | 33       | CG2      | THR      | A     | 26    | -13.444  | 43.227   | 21.753 | 1.00257.28       | C |

|        |    |     |     |   |    |         |        |        |            |      |       |   |
|--------|----|-----|-----|---|----|---------|--------|--------|------------|------|-------|---|
| ANISOU | 33 | CG2 | THR | A | 26 | 35136   | 36182  | 26438  | -809       | 718  | -5014 | C |
| ATOM   | 34 | N   | THR | A | 27 | -10.512 | 40.183 | 20.715 | 1.00212.83 |      |       | N |
| ANISOU | 34 | NA  | THR | A | 27 | 29245   | 30191  | 21432  | -2710      | 416  | -5140 | N |
| ATOM   | 35 | C   | THR | A | 27 | -9.290  | 39.415 | 20.510 | 1.00207.60 |      |       | C |
| ANISOU | 35 | CA  | THR | A | 27 | 28599   | 29219  | 21059  | -3227      | 330  | -5213 | C |
| ATOM   | 36 | C   | THR | A | 27 | -8.111  | 39.990 | 21.286 | 1.00199.06 |      |       | C |
| ANISOU | 36 | C   | THR | A | 27 | 27966   | 27448  | 20221  | -3384      | 300  | -5219 | C |
| ATOM   | 37 | O   | THR | A | 27 | -7.089  | 39.326 | 21.459 | 1.00186.25 |      |       | O |
| ANISOU | 37 | O   | THR | A | 27 | 26329   | 25578  | 18859  | -3787      | 201  | -5311 | O |
| ATOM   | 38 | CB  | THR | A | 27 | -8.916  | 39.343 | 19.017 | 1.00216.64 |      |       | C |
| ANISOU | 38 | CB  | THR | A | 27 | 29607   | 30521  | 22184  | -3267      | 340  | -5131 | C |
| ATOM   | 39 | OG1 | THR | A | 27 | -7.689  | 38.620 | 18.863 | 1.00222.84 |      |       | O |
| ANISOU | 39 | OG1 | THR | A | 27 | 30378   | 31015  | 23275  | -3726      | 284  | -5256 | O |
| ATOM   | 40 | CG2 | THR | A | 27 | -8.748  | 40.741 | 18.443 | 1.00216.59 |      |       | C |
| ANISOU | 40 | CG2 | THR | A | 27 | 29964   | 30265  | 22066  | -2897      | 424  | -4870 | C |
| ATOM   | 41 | N   | LYS | A | 28 | -8.257  | 41.225 | 21.752 | 1.00212.93 |      |       | N |
| ANISOU | 41 | N   | LYS | A | 28 | 30106   | 28901  | 21896  | -3054      | 379  | -5150 | N |
| ATOM   | 42 | CA  | LYS | A | 28 | -7.191  | 41.889 | 22.493 | 1.00223.04 |      |       | C |
| ANISOU | 42 | CA  | LYS | A | 28 | 31825   | 29546  | 23375  | -3236      | 355  | -5204 | C |
| ATOM   | 43 | C   | LYS | A | 28 | -7.455  | 41.927 | 23.995 | 1.00218.87 |      |       | C |
| ANISOU | 43 | C   | LYS | A | 28 | 31448   | 28939  | 22775  | -3243      | 325  | -5375 | C |
| ATOM   | 44 | O   | LYS | A | 28 | -6.709  | 42.552 | 24.748 | 1.00219.51 |      |       | O |
| ANISOU | 44 | O   | LYS | A | 28 | 31899   | 28552  | 22953  | -3374      | 295  | -5473 | O |
| ATOM   | 45 | CB  | LYS | A | 28 | -6.962  | 43.305 | 21.960 | 1.00234.53 |      |       | C |
| ANISOU | 45 | CB  | LYS | A | 28 | 33714   | 30571  | 24824  | -2963      | 478  | -5040 | C |
| ATOM   | 46 | CG  | LYS | A | 28 | -6.137  | 43.358 | 20.685 | 1.00237.34 |      |       | C |
| ANISOU | 46 | CG  | LYS | A | 28 | 34053   | 30838  | 25286  | -3169      | 507  | -4873 | C |
| ATOM   | 47 | CD  | LYS | A | 28 | -5.659  | 44.772 | 20.404 | 1.00243.36 |      |       | C |
| ANISOU | 47 | CD  | LYS | A | 28 | 35364   | 31008  | 26092  | -3061      | 636  | -4695 | C |
| ATOM   | 48 | CE  | LYS | A | 28 | -5.002  | 45.381 | 21.634 | 1.00248.65 |      |       | C |
| ANISOU | 48 | CE  | LYS | A | 28 | 36437   | 31097  | 26942  | -3265      | 618  | -4902 | C |
| ATOM   | 49 | NZ  | LYS | A | 28 | -3.922  | 44.514 | 22.186 | 1.00247.06 |      |       | N |
| ANISOU | 49 | NZ  | LYS | A | 28 | 36008   | 30900  | 26963  | -3831      | 462  | -5127 | N |
| ATOM   | 50 | N   | ASP | A | 29 | -8.515  | 41.249 | 24.427 | 1.00212.22 |      |       | N |
| ANISOU | 50 | N   | ASP | A | 29 | 30305   | 28600  | 21730  | -3149      | 344  | -5429 | N |
| ATOM   | 51 | CA  | ASP | A | 29 | -8.840  | 41.160 | 25.846 | 1.00201.93 |      |       | C |
| ANISOU | 51 | CA  | ASP | A | 29 | 29102   | 27343  | 20278  | -3199      | 345  | -5579 | C |
| ATOM   | 52 | C   | ASP | A | 29 | -8.034  | 40.060 | 26.526 | 1.00192.41 |      |       | C |
| ANISOU | 52 | C   | ASP | A | 29 | 27834   | 26061  | 19212  | -3726      | 152  | -5614 | C |
| ATOM   | 53 | O   | ASP | A | 29 | -8.363  | 39.636 | 27.634 | 1.00194.29 |      |       | O |
| ANISOU | 53 | O   | ASP | A | 29 | 28080   | 26465  | 19276  | -3856      | 130  | -5675 | O |
| ATOM   | 54 | CB  | ASP | A | 29 | -10.333 | 40.894 | 26.043 | 1.00200.74 |      |       | C |
| ANISOU | 54 | CB  | ASP | A | 29 | 28623   | 27828  | 19823  | -2921      | 482  | -5610 | C |
| ATOM   | 55 | CG  | ASP | A | 29 | -11.186 | 42.119 | 25.781 | 1.00204.83 |      |       | C |
| ANISOU | 55 | CG  | ASP | A | 29 | 29248   | 28407  | 20172  | -2274      | 654  | -5612 | C |
| ATOM   | 56 | OD1 | ASP | A | 29 | -10.730 | 43.017 | 25.045 | 1.00212.52 |      |       | O |
| ANISOU | 56 | OD1 | ASP | A | 29 | 30507   | 28965  | 21275  | -2044      | 663  | -5497 | O |
| ATOM   | 57 | OD2 | ASP | A | 29 | -12.315 | 42.182 | 26.310 | 1.00203.53 |      |       | O |
| ANISOU | 57 | OD2 | ASP | A | 29 | 28879   | 28709  | 19745  | -1986      | 789  | -5718 | O |
| ATOM   | 58 | N   | HIS | A | 30 | -6.981  | 39.600 | 25.858 | 1.00181.57 |      |       | N |
| ANISOU | 58 | N   | HIS | A | 30 | 26396   | 24457  | 18137  | -4005      | 18   | -5563 | N |
| ATOM   | 59 | CA  | HIS | A | 30 | -6.159  | 38.515 | 26.376 | 1.00171.18 |      |       | C |
| ANISOU | 59 | CA  | HIS | A | 30 | 24992   | 23040  | 17007  | -4416      | -196 | -5572 | C |
| ATOM   | 60 | C   | HIS | A | 30 | -4.681  | 38.882 | 26.402 | 1.00156.87 |      |       | C |
| ANISOU | 60 | C   | HIS | A | 30 | 23359   | 20777  | 15467  | -4621      | -347 | -5619 | C |
| ATOM   | 61 | O   | HIS | A | 30 | -4.246  | 39.812 | 25.722 | 1.00148.03 |      |       | O |
| ANISOU | 61 | O   | HIS | A | 30 | 22382   | 19428  | 14436  | -4537      | -255 | -5626 | O |
| ATOM   | 62 | CB  | HIS | A | 30 | -6.370  | 37.243 | 25.553 | 1.00169.88 |      |       | C |
| ANISOU | 62 | CB  | HIS | A | 30 | 24438   | 23130  | 16978  | -4574      | -224 | -5526 | C |
| ATOM   | 63 | CG  | HIS | A | 30 | -7.785  | 36.759 | 25.550 | 1.00166.81 |      |       | C |
| ANISOU | 63 | CG  | HIS | A | 30 | 23806   | 23242  | 16332  | -4491      | -91  | -5511 | C |
| ATOM   | 64 | ND1 | HIS | A | 30 | -8.679  | 37.079 | 24.550 | 1.00160.35 |      |       | N |
| ANISOU | 64 | ND1 | HIS | A | 30 | 22762   | 22796  | 15365  | -4224      | 66   | -5510 | N |
| ATOM   | 65 | CD2 | HIS | A | 30 | -8.467  | 35.990 | 26.431 | 1.00165.40 |      |       | C |
| ANISOU | 65 | CD2 | HIS | A | 30 | 23550   | 23305  | 15989  | -4668      | -89  | -5489 | C |
| ATOM   | 66 | CE1 | HIS | A | 30 | -9.846  | 36.521 | 24.812 | 1.00157.81 |      |       | C |
| ANISOU | 66 | CE1 | HIS | A | 30 | 22180   | 22957  | 14822  | -4247      | 153  | -5531 | C |
| ATOM   | 67 | NE2 | HIS | A | 30 | -9.746  | 35.855 | 25.948 | 1.00163.37 |      |       | N |
| ANISOU | 67 | NE2 | HIS | A | 30 | 22982   | 23576  | 15516  | -4542      | 86   | -5515 | N |
| ATOM   | 68 | N   | GLY | A | 31 | -3.915  | 38.137 | 27.192 | 1.00154.42 |      |       | N |

|        |     |     |     |   |    |        |        |        |            |       |       |   |
|--------|-----|-----|-----|---|----|--------|--------|--------|------------|-------|-------|---|
| ANISOU | 68  | N   | GLY | A | 31 | 23030  | 20365  | 15278  | -4901      | -584  | -5632 | N |
| ATOM   | 69  | CA  | GLY | A | 31 | -2.489 | 38.368 | 27.317 | 1.00151.07 |       |       | C |
| ANISOU | 69  | CA  | GLY | A | 31 | 22670  | 19623  | 15107  | -5116      | -769  | -5705 | C |
| ATOM   | 70  | C   | GLY | A | 31 | -1.699 | 37.874 | 26.121 | 1.00151.06 |       |       | C |
| ANISOU | 70  | C   | GLY | A | 31 | 22372  | 19573  | 15453  | -5216      | -782  | -5709 | C |
| ATOM   | 71  | O   | GLY | A | 31 | -2.243 | 37.728 | 25.025 | 1.00145.15 |       |       | O |
| ANISOU | 71  | O   | GLY | A | 31 | 21457  | 18989  | 14705  | -5094      | -603  | -5672 | O |
| ATOM   | 72  | N   | PRO | A | 32 | -0.402 | 37.614 | 26.327 | 1.00158.37 |       |       | N |
| ANISOU | 72  | N   | PRO | A | 32 | 23193  | 20334  | 16646  | -5432      | -999  | -5781 | N |
| ATOM   | 73  | CA  | PRO | A | 32 | 0.488  | 37.177 | 25.254 | 1.00159.88 |       |       | C |
| ANISOU | 73  | CA  | PRO | A | 32 | 23061  | 20512  | 17175  | -5527      | -993  | -5847 | C |
| ATOM   | 74  | C   | PRO | A | 32 | 0.642  | 35.666 | 25.200 | 1.00160.82 |       |       | C |
| ANISOU | 74  | C   | PRO | A | 32 | 22880  | 20699  | 17523  | -5534      | -1162 | -5838 | C |
| ATOM   | 75  | O   | PRO | A | 32 | 0.354  | 34.964 | 26.169 | 1.00166.93 |       |       | O |
| ANISOU | 75  | O   | PRO | A | 32 | 23729  | 21463  | 18235  | -5534      | -1354 | -5736 | O |
| ATOM   | 76  | CB  | PRO | A | 32 | 1.822  | 37.809 | 25.646 | 1.00166.76 |       |       | C |
| ANISOU | 76  | CB  | PRO | A | 32 | 23950  | 21204  | 18210  | -5750      | -1141 | -5969 | C |
| ATOM   | 77  | CG  | PRO | A | 32 | 1.749  | 37.989 | 27.156 | 1.00179.62 |       |       | C |
| ANISOU | 77  | CG  | PRO | A | 32 | 25835  | 22782  | 19629  | -5793      | -1370 | -5963 | C |
| ATOM   | 78  | CD  | PRO | A | 32 | 0.322  | 37.756 | 27.600 | 1.00175.20 |       |       | C |
| ANISOU | 78  | CD  | PRO | A | 32 | 25469  | 22353  | 18747  | -5591      | -1269 | -5833 | C |
| ATOM   | 79  | N   | VAL | A | 33 | 1.097  | 35.175 | 24.056 | 1.00154.60 |       |       | N |
| ANISOU | 79  | N   | VAL | A | 33 | 21786  | 19964  | 16991  | -5546      | -1072 | -5945 | N |
| ATOM   | 80  | CA  | VAL | A | 33 | 1.457  | 33.778 | 23.911 | 1.00159.09 |       |       | C |
| ANISOU | 80  | CA  | VAL | A | 33 | 22080  | 20497  | 17868  | -5533      | -1223 | -6006 | C |
| ATOM   | 81  | C   | VAL | A | 33 | 2.944  | 33.668 | 24.233 | 1.00169.80 |       |       | C |
| ANISOU | 81  | C   | VAL | A | 33 | 23233  | 21735  | 19548  | -5595      | -1465 | -6110 | C |
| ATOM   | 82  | O   | VAL | A | 33 | 3.562  | 34.649 | 24.655 | 1.00172.13 |       |       | O |
| ANISOU | 82  | O   | VAL | A | 33 | 23613  | 22012  | 19779  | -5713      | -1517 | -6133 | O |
| ATOM   | 83  | CB  | VAL | A | 33 | 1.180  | 33.284 | 22.479 | 1.00169.11 |       |       | C |
| ANISOU | 83  | CB  | VAL | A | 33 | 23098  | 21927  | 19229  | -5500      | -985  | -6154 | C |
| ATOM   | 84  | CG1 | VAL | A | 33 | 0.867  | 31.796 | 22.475 | 1.00183.44 |       |       | C |
| ANISOU | 84  | CG1 | VAL | A | 33 | 24789  | 23659  | 21250  | -5472      | -1081 | -6202 | C |
| ATOM   | 85  | CG2 | VAL | A | 33 | 0.019  | 34.058 | 21.876 | 1.00162.27 |       |       | C |
| ANISOU | 85  | CG2 | VAL | A | 33 | 22376  | 21296  | 17982  | -5440      | -714  | -6075 | C |
| ATOM   | 86  | N   | PHE | A | 34 | 3.508  | 32.477 | 24.048 | 1.00177.08 |       |       | N |
| ANISOU | 86  | N   | PHE | A | 34 | 23878  | 22577  | 20827  | -5510      | -1615 | -6198 | N |
| ATOM   | 87  | CA  | PHE | A | 34 | 4.938  | 32.234 | 24.246 | 1.00177.44 |       |       | C |
| ANISOU | 87  | CA  | PHE | A | 34 | 23613  | 22583  | 21225  | -5487      | -1858 | -6326 | C |
| ATOM   | 88  | C   | PHE | A | 34 | 5.406  | 32.499 | 25.678 | 1.00194.56 |       |       | C |
| ANISOU | 88  | C   | PHE | A | 34 | 25926  | 24697  | 23302  | -5520      | -2229 | -6172 | C |
| ATOM   | 89  | O   | PHE | A | 34 | 5.625  | 31.564 | 26.450 | 1.00198.90 |       |       | O |
| ANISOU | 89  | O   | PHE | A | 34 | 26470  | 25117  | 23987  | -5375      | -2557 | -6034 | O |
| ATOM   | 90  | CB  | PHE | A | 34 | 5.775  | 33.041 | 23.245 | 1.00157.98 |       |       | C |
| ANISOU | 90  | CB  | PHE | A | 34 | 20865  | 20307  | 18852  | -5626      | -1626 | -6559 | C |
| ATOM   | 91  | CG  | PHE | A | 34 | 5.326  | 32.888 | 21.819 | 1.00151.58 |       |       | C |
| ANISOU | 91  | CG  | PHE | A | 34 | 19931  | 19637  | 18024  | -5616      | -1258 | -6701 | C |
| ATOM   | 92  | CD1 | PHE | A | 34 | 5.639  | 31.748 | 21.098 | 1.00152.96 |       |       | C |
| ANISOU | 92  | CD1 | PHE | A | 34 | 19776  | 19824  | 18518  | -5475      | -1228 | -6926 | C |
| ATOM   | 93  | CD2 | PHE | A | 34 | 4.595  | 33.888 | 21.198 | 1.00149.75 |       |       | C |
| ANISOU | 93  | CD2 | PHE | A | 34 | 19924  | 19532  | 17442  | -5724      | -953  | -6619 | C |
| ATOM   | 94  | CE1 | PHE | A | 34 | 5.229  | 31.606 | 19.788 | 1.00152.39 |       |       | C |
| ANISOU | 94  | CE1 | PHE | A | 34 | 19586  | 19948  | 18367  | -5497      | -895  | -7102 | C |
| ATOM   | 95  | CE2 | PHE | A | 34 | 4.182  | 33.752 | 19.887 | 1.00151.32 |       |       | C |
| ANISOU | 95  | CE2 | PHE | A | 34 | 20002  | 19940  | 17551  | -5714      | -651  | -6726 | C |
| ATOM   | 96  | CZ  | PHE | A | 34 | 4.500  | 32.610 | 19.181 | 1.00156.12 |       |       | C |
| ANISOU | 96  | CZ  | PHE | A | 34 | 20266  | 20622  | 18432  | -5629      | -618  | -6986 | C |
| ATOM   | 97  | N   | GLY | A | 35 | 5.559  | 33.774 | 26.024 | 1.00200.81 |       |       | N |
| ANISOU | 97  | N   | GLY | A | 35 | 26876  | 25575  | 23846  | -5717      | -2181 | -6193 | N |
| ATOM   | 98  | CA  | GLY | A | 35 | 6.053  | 34.156 | 27.335 | 1.00204.40 |       |       | C |
| ANISOU | 98  | CA  | GLY | A | 35 | 27456  | 26050  | 24157  | -5807      | -2522 | -6128 | C |
| ATOM   | 99  | C   | GLY | A | 35 | 5.142  | 33.743 | 28.476 | 1.00201.65 |       |       | C |
| ANISOU | 99  | C   | GLY | A | 35 | 27484  | 25640  | 23494  | -5730      | -2694 | -5862 | C |
| ATOM   | 100 | O   | GLY | A | 35 | 3.941  | 34.018 | 28.442 | 1.00199.39 |       |       | O |
| ANISOU | 100 | O   | GLY | A | 35 | 27503  | 25341  | 22914  | -5730      | -2443 | -5771 | O |
| ATOM   | 101 | N   | PRO | A | 36 | 5.710  | 33.066 | 29.490 | 1.00198.70 |       |       | N |
| ANISOU | 101 | N   | PRO | A | 36 | 27068  | 25274  | 23158  | -5654      | -3126 | -5720 | N |
| ATOM   | 102 | CA  | PRO | A | 36 | 5.000  | 32.668 | 30.710 | 1.00192.57 |       |       | C |
| ANISOU | 102 | CA  | PRO | A | 36 | 26659  | 24488  | 22021  | -5633      | -3324 | -5424 | C |
| ATOM   | 103 | C   | PRO | A | 36 | 4.275  | 33.847 | 31.352 | 1.00181.91 |       |       | C |

|        |     |     |     |   |    |        |        |        |            |       |       |   |
|--------|-----|-----|-----|---|----|--------|--------|--------|------------|-------|-------|---|
| ANISOU | 103 | C   | PRO | A | 36 | 25691  | 23263  | 20161  | -5818      | -3160 | -5467 | C |
| ATOM   | 104 | O   | PRO | A | 36 | 4.787  | 34.966 | 31.343 | 1.00185.00 |       |       | O |
| ANISOU | 104 | O   | PRO | A | 36 | 26079  | 23720  | 20494  | -5981      | -3116 | -5705 | O |
| ATOM   | 105 | CB  | PRO | A | 36 | 6.128  | 32.178 | 31.617 | 1.00195.54 |       |       | C |
| ANISOU | 105 | CB  | PRO | A | 36 | 26864  | 24939  | 22492  | -5552      | -3855 | -5322 | C |
| ATOM   | 106 | CG  | PRO | A | 36 | 7.143  | 31.645 | 30.672 | 1.00193.89 |       |       | C |
| ANISOU | 106 | CG  | PRO | A | 36 | 26149  | 24674  | 22848  | -5380      | -3907 | -5498 | C |
| ATOM   | 107 | CD  | PRO | A | 36 | 7.093  | 32.555 | 29.472 | 1.00195.69 |       |       | C |
| ANISOU | 107 | CD  | PRO | A | 36 | 26238  | 24948  | 23168  | -5548      | -3457 | -5815 | C |
| ATOM   | 108 | N   | CYS | A | 37 | 3.096  | 33.592 | 31.907 | 1.00169.79 |       |       | N |
| ANISOU | 108 | N   | CYS | A | 37 | 24484  | 21755  | 18273  | -5806      | -3052 | -5262 | N |
| ATOM   | 109 | CA  | CYS | A | 37 | 2.218  | 34.663 | 32.364 | 1.00174.94 |       |       | C |
| ANISOU | 109 | CA  | CYS | A | 37 | 25475  | 22531  | 18465  | -5899      | -2808 | -5351 | C |
| ATOM   | 110 | C   | CYS | A | 37 | 2.661  | 35.319 | 33.672 | 1.00196.46 |       |       | C |
| ANISOU | 110 | C   | CYS | A | 37 | 28417  | 25416  | 20814  | -6047      | -3072 | -5417 | C |
| ATOM   | 111 | O   | CYS | A | 37 | 3.764  | 35.078 | 34.163 | 1.00208.64 |       |       | O |
| ANISOU | 111 | O   | CYS | A | 37 | 29799  | 27020  | 22454  | -6101      | -3474 | -5408 | O |
| ATOM   | 112 | CB  | CYS | A | 37 | 0.788  | 34.147 | 32.503 | 1.00164.06 |       |       | C |
| ANISOU | 112 | CB  | CYS | A | 37 | 24287  | 21228  | 16820  | -5849      | -2572 | -5152 | C |
| ATOM   | 113 | SG  | CYS | A | 37 | -0.412 | 35.446 | 32.804 | 1.00170.06 |       |       | S |
| ANISOU | 113 | SG  | CYS | A | 37 | 25360  | 22169  | 17086  | -5837      | -2189 | -5321 | S |
| ATOM   | 114 | N   | SER | A | 38 | 1.784  | 36.152 | 34.227 | 1.00195.84 |       |       | N |
| ANISOU | 114 | N   | SER | A | 38 | 28677  | 25444  | 20289  | -6094      | -2849 | -5516 | N |
| ATOM   | 115 | CA  | SER | A | 38 | 2.071  | 36.864 | 35.467 | 1.00197.54 |       |       | C |
| ANISOU | 115 | CA  | SER | A | 38 | 29146  | 25835  | 20074  | -6258      | -3042 | -5662 | C |
| ATOM   | 116 | C   | SER | A | 38 | 0.823  | 37.006 | 36.334 | 1.00215.32 |       |       | C |
| ANISOU | 116 | C   | SER | A | 38 | 31748  | 28304  | 21761  | -6238      | -2840 | -5609 | C |
| ATOM   | 117 | O   | SER | A | 38 | 0.808  | 36.586 | 37.491 | 1.00229.87 |       |       | O |
| ANISOU | 117 | O   | SER | A | 38 | 33744  | 30403  | 23194  | -6334      | -3083 | -5450 | O |
| ATOM   | 118 | CB  | SER | A | 38 | 2.660  | 38.240 | 35.163 | 1.00181.42 |       |       | C |
| ANISOU | 118 | CB  | SER | A | 38 | 27158  | 23646  | 18126  | -6399      | -2933 | -6065 | C |
| ATOM   | 119 | OG  | SER | A | 38 | 3.817  | 38.123 | 34.357 | 1.00170.55 |       |       | O |
| ANISOU | 119 | OG  | SER | A | 38 | 25409  | 22149  | 17242  | -6472      | -3076 | -6128 | O |
| ATOM   | 120 | N   | GLN | A | 39 | -0.220 | 37.610 | 35.772 | 1.00212.43 |       |       | N |
| ANISOU | 120 | N   | GLN | A | 39 | 31486  | 27883  | 21346  | -6097      | -2394 | -5736 | N |
| ATOM   | 121 | CA  | GLN | A | 39 | -1.495 | 37.748 | 36.465 | 1.00214.81 |       |       | C |
| ANISOU | 121 | CA  | GLN | A | 39 | 32024  | 28451  | 21143  | -6032      | -2133 | -5728 | C |
| ATOM   | 122 | C   | GLN | A | 39 | -2.547 | 36.911 | 35.748 | 1.00216.03 |       |       | C |
| ANISOU | 122 | C   | GLN | A | 39 | 31995  | 28676  | 21409  | -5901      | -1875 | -5481 | C |
| ATOM   | 123 | O   | GLN | A | 39 | -2.424 | 36.650 | 34.557 | 1.00200.14 |       |       | O |
| ANISOU | 123 | O   | GLN | A | 39 | 29741  | 26462  | 19842  | -5808      | -1800 | -5442 | O |
| ATOM   | 124 | CB  | GLN | A | 39 | -1.931 | 39.215 | 36.494 | 1.00209.39 |       |       | C |
| ANISOU | 124 | CB  | GLN | A | 39 | 31592  | 27688  | 20277  | -5920      | -1822 | -6131 | C |
| ATOM   | 125 | CG  | GLN | A | 39 | -3.155 | 39.486 | 37.360 | 1.00204.97 |       |       | C |
| ANISOU | 125 | CG  | GLN | A | 39 | 31254  | 27469  | 19156  | -5821      | -1551 | -6223 | C |
| ATOM   | 126 | CD  | GLN | A | 39 | -3.884 | 40.754 | 36.964 | 1.00196.78 |       |       | C |
| ANISOU | 126 | CD  | GLN | A | 39 | 30387  | 26284  | 18097  | -5529      | -1150 | -6564 | C |
| ATOM   | 127 | OE1 | GLN | A | 39 | -3.494 | 41.439 | 36.018 | 1.00197.10 |       |       | O |
| ANISOU | 127 | OE1 | GLN | A | 39 | 30432  | 25925  | 18531  | -5424      | -1075 | -6677 | O |
| ATOM   | 128 | NE2 | GLN | A | 39 | -4.953 | 41.072 | 37.686 | 1.00188.01 |       |       | N |
| ANISOU | 128 | NE2 | GLN | A | 39 | 29421  | 25497  | 16517  | -5379      | -879  | -6717 | N |
| ATOM   | 129 | N   | LEU | A | 40 | -3.586 | 36.496 | 36.464 | 1.00233.29 |       |       | N |
| ANISOU | 129 | N   | LEU | A | 40 | 34279  | 31196  | 23163  | -5935      | -1725 | -5342 | N |
| ATOM   | 130 | CA  | LEU | A | 40 | -4.680 | 35.755 | 35.846 | 1.00238.15 |       |       | C |
| ANISOU | 130 | CA  | LEU | A | 40 | 34696  | 31949  | 23839  | -5885      | -1455 | -5159 | C |
| ATOM   | 131 | C   | LEU | A | 40 | -5.968 | 36.574 | 35.871 | 1.00236.13 |       |       | C |
| ANISOU | 131 | C   | LEU | A | 40 | 34465  | 32000  | 23252  | -5688      | -1024 | -5384 | C |
| ATOM   | 132 | O   | LEU | A | 40 | -6.886 | 36.262 | 36.627 | 1.00252.60 |       |       | O |
| ANISOU | 132 | O   | LEU | A | 40 | 36587  | 34490  | 24901  | -5778      | -854  | -5306 | O |
| ATOM   | 133 | CB  | LEU | A | 40 | -4.905 | 34.419 | 36.562 | 1.00246.83 |       |       | C |
| ANISOU | 133 | CB  | LEU | A | 40 | 35829  | 33204  | 24749  | -6138      | -1601 | -4762 | C |
| ATOM   | 134 | CG  | LEU | A | 40 | -3.697 | 33.517 | 36.832 | 1.00245.54 |       |       | C |
| ANISOU | 134 | CG  | LEU | A | 40 | 35693  | 32769  | 24830  | -6265      | -2075 | -4479 | C |
| ATOM   | 135 | CD1 | LEU | A | 40 | -3.061 | 33.829 | 38.184 | 1.00245.58 |       |       | C |
| ANISOU | 135 | CD1 | LEU | A | 40 | 35969  | 32951  | 24390  | -6379      | -2384 | -4450 | C |
| ATOM   | 136 | CD2 | LEU | A | 40 | -4.093 | 32.051 | 36.749 | 1.00244.93 |       |       | C |
| ANISOU | 136 | CD2 | LEU | A | 40 | 35575  | 32611  | 24876  | -6427      | -2106 | -4071 | C |
| ATOM   | 137 | N   | PRO | A | 41 | -6.044 | 37.626 | 35.042 | 1.00215.13 |       |       | N |
| ANISOU | 137 | N   | PRO | A | 41 | 31781  | 29165  | 20793  | -5404      | -836  | -5648 | N |
| ATOM   | 138 | CA  | PRO | A | 41 | -7.198 | 38.516 | 35.062 | 1.00213.32 |       |       | C |

|        |     |     |     |   |    |         |        |        |            |      |       |   |
|--------|-----|-----|-----|---|----|---------|--------|--------|------------|------|-------|---|
| ANISOU | 138 | CA  | PRO | A | 41 | 31581   | 29183  | 20287  | -5100      | -457 | -5879 | C |
| ATOM   | 139 | C   | PRO | A | 41 | -8.078  | 38.210 | 33.870 | 1.00204.37 |      |       | C |
| ANISOU | 139 | C   | PRO | A | 41 | 30096   | 28197  | 19358  | -4904      | -233 | -5790 | C |
| ATOM   | 140 | O   | PRO | A | 41 | -8.168  | 37.051 | 33.465 | 1.00193.21 |      |       | O |
| ANISOU | 140 | O   | PRO | A | 41 | 28439   | 26868  | 18103  | -5116      | -307 | -5549 | O |
| ATOM   | 141 | CB  | PRO | A | 41 | -6.548  | 39.881 | 34.856 | 1.00218.10 |      |       | C |
| ANISOU | 141 | CB  | PRO | A | 41 | 32449   | 29379  | 21038  | -4908      | -454 | -6181 | C |
| ATOM   | 142 | CG  | PRO | A | 41 | -5.297  | 39.574 | 34.003 | 1.00213.44 |      |       | C |
| ANISOU | 142 | CG  | PRO | A | 41 | 31759   | 28382  | 20956  | -5074      | -727 | -6055 | C |
| ATOM   | 143 | CD  | PRO | A | 41 | -5.086  | 38.070 | 34.021 | 1.00205.64 |      |       | C |
| ANISOU | 143 | CD  | PRO | A | 41 | 30528   | 27531  | 20076  | -5329      | -947 | -5730 | C |
| ATOM   | 144 | N   | ARG | A | 42 | -8.705  | 39.246 | 33.317 | 1.00247.96 |      |       | N |
| ANISOU | 144 | N   | ARG | A | 42 | 39744   | 24910  | 29560  | -5442      | 7422 | -5569 | N |
| ATOM   | 145 | CA  | ARG | A | 42 | -9.473  | 39.134 | 32.082 | 1.00249.28 |      |       | C |
| ANISOU | 145 | CA  | ARG | A | 42 | 40221   | 24954  | 29541  | -5075      | 7742 | -4730 | C |
| ATOM   | 146 | C   | ARG | A | 42 | -10.555 | 38.068 | 32.196 | 1.00248.98 |      |       | C |
| ANISOU | 146 | C   | ARG | A | 42 | 40145   | 25553  | 28903  | -4643      | 7062 | -4051 | C |
| ATOM   | 147 | O   | ARG | A | 42 | -10.876 | 37.391 | 31.219 | 1.00252.10 |      |       | O |
| ANISOU | 147 | O   | ARG | A | 42 | 40543   | 26053  | 29189  | -4357      | 6910 | -3476 | O |
| ATOM   | 148 | CB  | ARG | A | 42 | -8.534  | 38.831 | 30.913 | 1.00245.04 |      |       | C |
| ANISOU | 148 | CB  | ARG | A | 42 | 39526   | 24181  | 29397  | -5283      | 7950 | -4773 | C |
| ATOM   | 149 | CG  | ARG | A | 42 | -7.317  | 39.746 | 30.867 | 1.00252.59 |      |       | C |
| ANISOU | 149 | CG  | ARG | A | 42 | 40395   | 24535  | 31041  | -5816      | 8601 | -5550 | C |
| ATOM   | 150 | CD  | ARG | A | 42 | -6.240  | 39.210 | 29.942 | 1.00257.27 |      |       | C |
| ANISOU | 150 | CD  | ARG | A | 42 | 40661   | 25069  | 32020  | -6111      | 8653 | -5764 | C |
| ATOM   | 151 | NE  | ARG | A | 42 | -5.106  | 40.125 | 29.843 | 1.00271.36 |      |       | N |
| ANISOU | 151 | NE  | ARG | A | 42 | 42343   | 26220  | 34540  | -6653      | 9394 | -6521 | N |
| ATOM   | 152 | CZ  | ARG | A | 42 | -3.930  | 39.929 | 30.429 | 1.00279.14 |      |       | C |
| ANISOU | 152 | CZ  | ARG | A | 42 | 42760   | 27262  | 36039  | -7125      | 9097 | -7488 | C |
| ATOM   | 153 | NH1 | ARG | A | 42 | -3.720  | 38.840 | 31.154 | 1.00276.69 |      |       | N |
| ANISOU | 153 | NH1 | ARG | A | 42 | 42009   | 27611  | 35512  | -7105      | 8028 | -7802 | N |
| ATOM   | 154 | NH2 | ARG | A | 42 | -2.958  | 40.820 | 30.283 | 1.00287.21 |      |       | N |
| ANISOU | 154 | NH2 | ARG | A | 42 | 43671   | 27638  | 37817  | -7608      | 9856 | -8177 | N |
| ATOM   | 155 | N   | HIS | A | 43 | -11.091 | 37.924 | 33.407 | 1.00242.06 |      |       | N |
| ANISOU | 155 | N   | HIS | A | 43 | 39226   | 25085  | 27663  | -4591      | 6663 | -4146 | N |
| ATOM   | 156 | CA  | HIS | A | 43 | -12.106 | 36.921 | 33.746 | 1.00234.40 |      |       | C |
| ANISOU | 156 | CA  | HIS | A | 43 | 38187   | 24729  | 26143  | -4268      | 6043 | -3579 | C |
| ATOM   | 157 | C   | HIS | A | 43 | -11.790 | 35.497 | 33.271 | 1.00223.19 |      |       | C |
| ANISOU | 157 | C   | HIS | A | 43 | 36410   | 23746  | 24648  | -4259      | 5278 | -3306 | C |
| ATOM   | 158 | O   | HIS | A | 43 | -12.683 | 34.655 | 33.182 | 1.00219.47 |      |       | O |
| ANISOU | 158 | O   | HIS | A | 43 | 35886   | 23672  | 23830  | -3937      | 4845 | -2700 | O |
| ATOM   | 159 | CB  | HIS | A | 43 | -13.503 | 37.359 | 33.283 | 1.00244.59 |      |       | C |
| ANISOU | 159 | CB  | HIS | A | 43 | 39844   | 25881  | 27209  | -3765      | 6458 | -2942 | C |
| ATOM   | 160 | CG  | HIS | A | 43 | -13.729 | 37.223 | 31.808 | 1.00258.63 |      |       | C |
| ANISOU | 160 | CG  | HIS | A | 43 | 41777   | 27350  | 29141  | -3429      | 6682 | -2416 | C |
| ATOM   | 161 | ND1 | HIS | A | 43 | -13.939 | 36.007 | 31.196 | 1.00258.63 |      |       | N |
| ANISOU | 161 | ND1 | HIS | A | 43 | 41528   | 27711  | 29028  | -3182      | 6096 | -1923 | N |
| ATOM   | 162 | CD2 | HIS | A | 43 | -13.779 | 38.154 | 30.826 | 1.00266.88 |      |       | C |
| ANISOU | 162 | CD2 | HIS | A | 43 | 43251   | 27730  | 30422  | -3257      | 7403 | -2312 | C |
| ATOM   | 163 | CE1 | HIS | A | 43 | -14.107 | 36.193 | 29.898 | 1.00259.88 |      |       | C |
| ANISOU | 163 | CE1 | HIS | A | 43 | 41938   | 27456  | 29347  | -2827      | 6439 | -1553 | C |
| ATOM   | 164 | NE2 | HIS | A | 43 | -14.014 | 37.486 | 29.648 | 1.00265.31 |      |       | N |
| ANISOU | 164 | NE2 | HIS | A | 43 | 43082   | 27505  | 30218  | -2872      | 7251 | -1770 | N |
| ATOM   | 165 | N   | THR | A | 44 | -10.523 | 35.234 | 32.968 | 1.00216.02 |      |       | N |
| ANISOU | 165 | N   | THR | A | 44 | 35220   | 22755  | 24102  | -4611      | 5094 | -3795 | N |
| ATOM   | 166 | CA  | THR | A | 44 | -10.097 | 33.896 | 32.581 | 1.00197.38 |      |       | C |
| ANISOU | 166 | CA  | THR | A | 44 | 32478   | 20829  | 21687  | -4628      | 4266 | -3666 | C |
| ATOM   | 167 | C   | THR | A | 44 | -9.950  | 33.042 | 33.832 | 1.00203.27 |      |       | C |
| ANISOU | 167 | C   | THR | A | 44 | 33039   | 22114  | 22082  | -4801      | 3369 | -3961 | C |
| ATOM   | 168 | O   | THR | A | 44 | -10.094 | 31.821 | 33.785 | 1.00205.35 |      |       | O |
| ANISOU | 168 | O   | THR | A | 44 | 33087   | 22851  | 22085  | -4703      | 2545 | -3642 | O |
| ATOM   | 169 | CB  | THR | A | 44 | -8.768  | 33.916 | 31.805 | 1.00187.68 |      |       | C |
| ANISOU | 169 | CB  | THR | A | 44 | 30986   | 19340  | 20983  | -4952      | 4377 | -4176 | C |
| ATOM   | 170 | OG1 | THR | A | 44 | -7.743  | 34.494 | 32.621 | 1.00200.02 |      |       | O |
| ANISOU | 170 | OG1 | THR | A | 44 | 32433   | 20687  | 22880  | -5422      | 4488 | -5134 | O |
| ATOM   | 171 | CG2 | THR | A | 44 | -8.910  | 34.723 | 30.522 | 1.00176.78 |      |       | C |
| ANISOU | 171 | CG2 | THR | A | 44 | 29898   | 17394  | 19878  | -4772      | 5305 | -3823 | C |
| ATOM   | 172 | N   | LEU | A | 45 | -9.661  | 33.696 | 34.952 | 1.00209.17 |      |       | N |
| ANISOU | 172 | N   | LEU | A | 45 | 33910   | 22753  | 22811  | -5026      | 3508 | -4576 | N |
| ATOM   | 173 | CA  | LEU | A | 45 | -9.615  | 33.020 | 36.240 | 1.00210.55 |      |       | C |



|        |     |     |     |   |    |         |        |        |            |      |       |   |
|--------|-----|-----|-----|---|----|---------|--------|--------|------------|------|-------|---|
| ANISOU | 173 | CA  | LEU | A | 45 | 34076   | 23366  | 22555  | -5120      | 2735 | -4855 | C |
| ATOM   | 174 | C   | LEU | A | 45 | -11.029 | 32.626 | 36.638 | 1.00206.97 |      |       | C |
| ANISOU | 174 | C   | LEU | A | 45 | 33836   | 23296  | 21508  | -4796      | 2645 | -4066 | C |
| ATOM   | 175 | O   | LEU | A | 45 | -11.241 | 31.604 | 37.289 | 1.00201.59 |      |       | O |
| ANISOU | 175 | O   | LEU | A | 45 | 33137   | 23080  | 20378  | -4798      | 1892 | -3905 | O |
| ATOM   | 176 | CB  | LEU | A | 45 | -9.001  | 33.926 | 37.306 | 1.00219.50 |      |       | C |
| ANISOU | 176 | CB  | LEU | A | 45 | 35331   | 24231  | 23836  | -5335      | 2955 | -5728 | C |
| ATOM   | 177 | CG  | LEU | A | 45 | -8.713  | 33.263 | 38.655 | 1.00218.21 |      |       | C |
| ANISOU | 177 | CG  | LEU | A | 45 | 35239   | 24428  | 23242  | -5410      | 2110 | -6194 | C |
| ATOM   | 178 | CD1 | LEU | A | 45 | -7.803  | 32.062 | 38.459 | 1.00214.05 |      |       | C |
| ANISOU | 178 | CD1 | LEU | A | 45 | 34423   | 24141  | 22767  | -5593      | 1142 | -6515 | C |
| ATOM   | 179 | CD2 | LEU | A | 45 | -8.097  | 34.257 | 39.630 | 1.00220.33 |      |       | C |
| ANISOU | 179 | CD2 | LEU | A | 45 | 35625   | 24356  | 23736  | -5516      | 2347 | -7107 | C |
| ATOM   | 180 | N   | GLN | A | 46 | -11.995 | 33.450 | 36.243 | 1.00211.82 |      |       | N |
| ANISOU | 180 | N   | GLN | A | 46 | 34667   | 23678  | 22138  | -4525      | 3420 | -3611 | N |
| ATOM   | 181 | CA  | GLN | A | 46 | -13.402 | 33.130 | 36.436 | 1.00214.70 |      |       | C |
| ANISOU | 181 | CA  | GLN | A | 46 | 35163   | 24353  | 22060  | -4193      | 3434 | -2892 | C |
| ATOM   | 182 | C   | GLN | A | 46 | -13.800 | 32.021 | 35.471 | 1.00203.03 |      |       | C |
| ANISOU | 182 | C   | GLN | A | 46 | 33454   | 23106  | 20583  | -3955      | 2969 | -2211 | C |
| ATOM   | 183 | O   | GLN | A | 46 | -14.571 | 31.126 | 35.820 | 1.00199.03 |      |       | O |
| ANISOU | 183 | O   | GLN | A | 46 | 32885   | 23023  | 19715  | -3821      | 2510 | -1734 | O |
| ATOM   | 184 | CB  | GLN | A | 46 | -14.273 | 34.366 | 36.207 | 1.00226.98 |      |       | C |
| ANISOU | 184 | CB  | GLN | A | 46 | 37002   | 25543  | 23698  | -3934      | 4334 | -2728 | C |
| ATOM   | 185 | CG  | GLN | A | 46 | -15.760 | 34.120 | 36.413 | 1.00230.75 |      |       | C |
| ANISOU | 185 | CG  | GLN | A | 46 | 37568   | 26311  | 23795  | -3585      | 4402 | -2112 | C |
| ATOM   | 186 | CD  | GLN | A | 46 | -16.603 | 35.340 | 36.096 | 1.00234.35 |      |       | C |
| ANISOU | 186 | CD  | GLN | A | 46 | 38305   | 26375  | 24360  | -3289      | 5204 | -2043 | C |
| ATOM   | 187 | OE1 | GLN | A | 46 | -16.098 | 36.351 | 35.606 | 1.00233.94 |      |       | O |
| ANISOU | 187 | OE1 | GLN | A | 46 | 38431   | 25795  | 24661  | -3331      | 5717 | -2356 | O |
| ATOM   | 188 | NE2 | GLN | A | 46 | -17.899 | 35.252 | 36.377 | 1.00235.54 |      |       | N |
| ANISOU | 188 | NE2 | GLN | A | 46 | 38505   | 26763  | 24227  | -2997      | 5309 | -1667 | N |
| ATOM   | 189 | N   | LYS | A | 47 | -13.265 | 32.091 | 34.254 | 1.00191.74 |      |       | N |
| ANISOU | 189 | N   | LYS | A | 47 | 31899   | 21377  | 19577  | -3890      | 3106 | -2175 | N |
| ATOM   | 190 | CA  | LYS | A | 47 | -13.462 | 31.043 | 33.260 | 1.00167.53 |      |       | C |
| ANISOU | 190 | CA  | LYS | A | 47 | 28575   | 18509  | 16571  | -3616      | 2587 | -1616 | C |
| ATOM   | 191 | C   | LYS | A | 47 | -12.887 | 29.734 | 33.783 | 1.00160.76 |      |       | C |
| ANISOU | 191 | C   | LYS | A | 47 | 27413   | 18162  | 15505  | -3856      | 1523 | -1740 | C |
| ATOM   | 192 | O   | LYS | A | 47 | -13.468 | 28.666 | 33.589 | 1.00158.36 |      |       | O |
| ANISOU | 192 | O   | LYS | A | 47 | 26925   | 18217  | 15029  | -3632      | 899  | -1185 | O |
| ATOM   | 193 | CB  | LYS | A | 47 | -12.792 | 31.421 | 31.938 | 1.00162.24 |      |       | C |
| ANISOU | 193 | CB  | LYS | A | 47 | 27868   | 17419  | 16358  | -3540      | 2953 | -1678 | C |
| ATOM   | 194 | CG  | LYS | A | 47 | -12.835 | 30.328 | 30.879 | 1.00157.25 |      |       | C |
| ANISOU | 194 | CG  | LYS | A | 47 | 26938   | 17005  | 15806  | -3217      | 2344 | -1185 | C |
| ATOM   | 195 | CD  | LYS | A | 47 | -12.080 | 30.741 | 29.625 | 1.00157.56 |      |       | C |
| ANISOU | 195 | CD  | LYS | A | 47 | 26989   | 16635  | 16243  | -3164      | 2770 | -1302 | C |
| ATOM   | 196 | CE  | LYS | A | 47 | -12.111 | 29.646 | 28.570 | 1.00153.68 |      |       | C |
| ANISOU | 196 | CE  | LYS | A | 47 | 26186   | 16393  | 15811  | -2771      | 2110 | -835  | C |
| ATOM   | 197 | NZ  | LYS | A | 47 | -11.395 | 30.048 | 27.325 | 1.00153.52 |      |       | N |
| ANISOU | 197 | NZ  | LYS | A | 47 | 26227   | 15986  | 16118  | -2688      | 2586 | -925  | N |
| ATOM   | 198 | N   | ALA | A | 48 | -11.741 | 29.826 | 34.449 | 1.00163.42 |      |       | N |
| ANISOU | 198 | N   | ALA | A | 48 | 27709   | 18492  | 15891  | -4290      | 1276 | -2518 | N |
| ATOM   | 199 | CA  | ALA | A | 48 | -11.155 | 28.673 | 35.116 | 1.00163.76 |      |       | C |
| ANISOU | 199 | CA  | ALA | A | 48 | 27580   | 18963  | 15677  | -4521      | 211  | -2781 | C |
| ATOM   | 200 | C   | ALA | A | 48 | -12.122 | 28.154 | 36.171 | 1.00173.60 |      |       | C |
| ANISOU | 200 | C   | ALA | A | 48 | 29046   | 20578  | 16337  | -4455      | -91  | -2377 | C |
| ATOM   | 201 | O   | ALA | A | 48 | -12.366 | 26.955 | 36.260 | 1.00172.93 |      |       | O |
| ANISOU | 201 | O   | ALA | A | 48 | 28837   | 20882  | 15986  | -4411      | -911 | -1998 | O |
| ATOM   | 202 | CB  | ALA | A | 48 | -9.827  | 29.042 | 35.746 | 1.00166.15 |      |       | C |
| ANISOU | 202 | CB  | ALA | A | 48 | 27869   | 19096  | 16163  | -4935      | 69   | -3818 | C |
| ATOM   | 203 | N   | LYS | A | 49 | -12.690 | 29.068 | 36.953 | 1.00187.13 |      |       | N |
| ANISOU | 203 | N   | LYS | A | 49 | 31085   | 22162  | 17854  | -4448      | 592  | -2451 | N |
| ATOM   | 204 | CA  | LYS | A | 49 | -13.670 | 28.703 | 37.972 | 1.00197.45 |      |       | C |
| ANISOU | 204 | CA  | LYS | A | 49 | 32627   | 23806  | 18588  | -4395      | 489  | -2077 | C |
| ATOM   | 205 | C   | LYS | A | 49 | -14.911 | 28.052 | 37.362 | 1.00190.02 |      |       | C |
| ANISOU | 205 | C   | LYS | A | 49 | 31535   | 23072  | 17593  | -4065      | 467  | -1161 | C |
| ATOM   | 206 | O   | LYS | A | 49 | -15.656 | 27.354 | 38.050 | 1.00183.61 |      |       | O |
| ANISOU | 206 | O   | LYS | A | 49 | 30808   | 22602  | 16354  | -4066      | 184  | -765  | O |
| ATOM   | 207 | CB  | LYS | A | 49 | -14.071 | 29.925 | 38.804 | 1.00212.47 |      |       | C |
| ANISOU | 207 | CB  | LYS | A | 49 | 34859   | 25528  | 20341  | -4393      | 1299 | -2360 | C |
| ATOM   | 208 | CG  | LYS | A | 49 | -12.978 | 30.444 | 39.729 | 1.00217.13 |      |       | C |

|        |     |     |     |   |    |         |        |        |            |       |       |   |
|--------|-----|-----|-----|---|----|---------|--------|--------|------------|-------|-------|---|
| ANISOU | 208 | CG  | LYS | A | 49 | 35627   | 25965  | 20908  | -4665      | 1191  | -3285 | C |
| ATOM   | 209 | CD  | LYS | A | 49 | -13.480 | 31.589 | 40.600 | 1.00210.74 |       |       | C |
| ANISOU | 209 | CD  | LYS | A | 49 | 35122   | 25035  | 19913  | -4590      | 1907  | -3514 | C |
| ATOM   | 210 | CE  | LYS | A | 49 | -12.408 | 32.054 | 41.576 | 1.00201.67 |       |       | C |
| ANISOU | 210 | CE  | LYS | A | 49 | 34140   | 23719  | 18766  | -4773      | 1705  | -4470 | C |
| ATOM   | 211 | NZ  | LYS | A | 49 | -12.897 | 33.144 | 42.465 | 1.00196.82 |       |       | N |
| ANISOU | 211 | NZ  | LYS | A | 49 | 33804   | 23024  | 17957  | -4642      | 2318  | -4706 | N |
| ATOM   | 212 | N   | ASP | A | 50 | -15.123 | 28.281 | 36.069 | 1.00192.53 |       |       | N |
| ANISOU | 212 | N   | ASP | A | 50 | 31646   | 23145  | 18363  | -3764      | 771   | -851  | N |
| ATOM   | 213 | CA  | ASP | A | 50 | -16.259 | 27.698 | 35.363 | 1.00200.24 |       |       | C |
| ANISOU | 213 | CA  | ASP | A | 50 | 32438   | 24233  | 19413  | -3349      | 707   | -68   | C |
| ATOM   | 214 | C   | ASP | A | 50 | -15.960 | 26.289 | 34.845 | 1.00193.75 |       |       | C |
| ANISOU | 214 | C   | ASP | A | 50 | 31258   | 23711  | 18648  | -3298      | -315  | 250   | C |
| ATOM   | 215 | O   | ASP | A | 50 | -16.773 | 25.691 | 34.139 | 1.00188.25 |       |       | O |
| ANISOU | 215 | O   | ASP | A | 50 | 30325   | 23086  | 18114  | -2905      | -512  | 867   | O |
| ATOM   | 216 | CB  | ASP | A | 50 | -16.714 | 28.610 | 34.223 | 1.00212.21 |       |       | C |
| ANISOU | 216 | CB  | ASP | A | 50 | 33992   | 25294  | 21345  | -2933      | 1461  | 103   | C |
| ATOM   | 217 | CG  | ASP | A | 50 | -17.206 | 29.957 | 34.719 | 1.00222.36 |       |       | C |
| ANISOU | 217 | CG  | ASP | A | 50 | 35630   | 26294  | 22563  | -2927      | 2393  | -151  | C |
| ATOM   | 218 | OD1 | ASP | A | 50 | -17.684 | 30.030 | 35.872 | 1.00224.55 |       |       | O |
| ANISOU | 218 | OD1 | ASP | A | 50 | 36046   | 26819  | 22454  | -3093      | 2487  | -221  | O |
| ATOM   | 219 | OD2 | ASP | A | 50 | -17.115 | 30.944 | 33.959 | 1.00225.89 |       |       | O |
| ANISOU | 219 | OD2 | ASP | A | 50 | 36244   | 26264  | 23320  | -2746      | 3019  | -282  | O |
| ATOM   | 220 | N   | GLU | A | 51 | -14.784 | 25.772 | 35.189 | 1.00189.87 |       |       | N |
| ANISOU | 220 | N   | GLU | A | 51 | 30709   | 23373  | 18060  | -3657      | -1016 | -232  | N |
| ATOM   | 221 | CA  | GLU | A | 51 | -14.481 | 24.356 | 34.994 | 1.00172.76 |       |       | C |
| ANISOU | 221 | CA  | GLU | A | 51 | 28250   | 21563  | 15829  | -3674      | -2151 | -13   | C |
| ATOM   | 222 | C   | GLU | A | 51 | -13.976 | 23.740 | 36.301 | 1.00174.78 |       |       | C |
| ANISOU | 222 | C   | GLU | A | 51 | 28743   | 22096  | 15568  | -4097      | -2845 | -381  | C |
| ATOM   | 223 | O   | GLU | A | 51 | -12.888 | 23.164 | 36.361 | 1.00169.20 |       |       | O |
| ANISOU | 223 | O   | GLU | A | 51 | 27944   | 21495  | 14851  | -4321      | -3670 | -874  | O |
| ATOM   | 224 | CB  | GLU | A | 51 | -13.492 | 24.135 | 33.842 | 1.00148.72 |       |       | C |
| ANISOU | 224 | CB  | GLU | A | 51 | 24856   | 18435  | 13217  | -3595      | -2544 | -254  | C |
| ATOM   | 225 | CG  | GLU | A | 51 | -12.337 | 25.113 | 33.789 | 1.00149.37 |       |       | C |
| ANISOU | 225 | CG  | GLU | A | 51 | 25026   | 18193  | 13535  | -3883      | -2067 | -1077 | C |
| ATOM   | 226 | CD  | GLU | A | 51 | -10.984 | 24.428 | 33.801 | 1.00148.73 |       |       | C |
| ANISOU | 226 | CD  | GLU | A | 51 | 24700   | 18281  | 13529  | -4192      | -2984 | -1737 | C |
| ATOM   | 227 | OE1 | GLU | A | 51 | -10.729 | 23.612 | 34.712 | 1.00149.28 |       |       | O |
| ANISOU | 227 | OE1 | GLU | A | 51 | 24846   | 18649  | 13223  | -4421      | -3851 | -1943 | O |
| ATOM   | 228 | OE2 | GLU | A | 51 | -10.172 | 24.705 | 32.894 | 1.00148.05 |       |       | O |
| ANISOU | 228 | OE2 | GLU | A | 51 | 24371   | 18014  | 13868  | -4202      | -2841 | -2081 | O |
| ATOM   | 229 | N   | LEU | A | 52 | -14.788 | 23.886 | 37.345 | 1.00174.66 |       |       | N |
| ANISOU | 229 | N   | LEU | A | 52 | 29071   | 22181  | 15110  | -4178      | -2499 | -177  | N |
| ATOM   | 230 | CA  | LEU | A | 52 | -14.524 | 23.299 | 38.657 | 1.00185.51 |       |       | C |
| ANISOU | 230 | CA  | LEU | A | 52 | 30818   | 23790  | 15876  | -4505      | -3077 | -409  | C |
| ATOM   | 231 | C   | LEU | A | 52 | -13.219 | 23.767 | 39.300 | 1.00197.38 |       |       | C |
| ANISOU | 231 | C   | LEU | A | 52 | 32570   | 25137  | 17289  | -4792      | -3273 | -1401 | C |
| ATOM   | 232 | O   | LEU | A | 52 | -12.523 | 22.982 | 39.937 | 1.00213.14 |       |       | O |
| ANISOU | 232 | O   | LEU | A | 52 | 34757   | 27281  | 18947  | -5001      | -4201 | -1767 | O |
| ATOM   | 233 | CB  | LEU | A | 52 | -14.562 | 21.767 | 38.587 | 1.00183.72 |       |       | C |
| ANISOU | 233 | CB  | LEU | A | 52 | 30447   | 23890  | 15469  | -4535      | -4223 | 15    | C |
| ATOM   | 234 | CG  | LEU | A | 52 | -15.893 | 21.137 | 38.172 | 1.00187.42 |       |       | C |
| ANISOU | 234 | CG  | LEU | A | 52 | 30672   | 24519  | 16021  | -4271      | -4154 | 971   | C |
| ATOM   | 235 | CD1 | LEU | A | 52 | -15.819 | 19.619 | 38.254 | 1.00192.44 |       |       | C |
| ANISOU | 235 | CD1 | LEU | A | 52 | 31209   | 25450  | 16459  | -4358      | -5371 | 1322  | C |
| ATOM   | 236 | CD2 | LEU | A | 52 | -17.030 | 21.670 | 39.030 | 1.00191.81 |       |       | C |
| ANISOU | 236 | CD2 | LEU | A | 52 | 31547   | 25088  | 16244  | -4297      | -3251 | 1273  | C |
| ATOM   | 237 | N   | ASN | A | 53 | -12.895 | 25.046 | 39.144 | 1.00187.81 |       |       | N |
| ANISOU | 237 | N   | ASN | A | 53 | 31372   | 23586  | 16403  | -4780      | -2436 | -1877 | N |
| ATOM   | 238 | CA  | ASN | A | 53 | -11.709 | 25.603 | 39.787 | 1.00183.88 |       |       | C |
| ANISOU | 238 | CA  | ASN | A | 53 | 31064   | 22874  | 15929  | -5018      | -2536 | -2883 | C |
| ATOM   | 239 | C   | ASN | A | 53 | -12.068 | 26.549 | 40.924 | 1.00192.26 |       |       | C |
| ANISOU | 239 | C   | ASN | A | 53 | 32573   | 23825  | 16653  | -5033      | -1854 | -3141 | C |
| ATOM   | 240 | O   | ASN | A | 53 | -13.049 | 27.288 | 40.848 | 1.00187.99 |       |       | O |
| ANISOU | 240 | O   | ASN | A | 53 | 32075   | 23229  | 16123  | -4864      | -968  | -2711 | O |
| ATOM   | 241 | CB  | ASN | A | 53 | -10.819 | 26.316 | 38.765 | 1.00177.59 |       |       | C |
| ANISOU | 241 | CB  | ASN | A | 53 | 29904   | 21727  | 15845  | -5044      | -2193 | -3384 | C |
| ATOM   | 242 | CG  | ASN | A | 53 | -9.589  | 26.952 | 39.393 | 1.00182.53 |       |       | C |
| ANISOU | 242 | CG  | ASN | A | 53 | 30639   | 22068  | 16647  | -5288      | -2240 | -4505 | C |
| ATOM   | 243 | OD1 | ASN | A | 53 | -9.166  | 26.575 | 40.486 | 1.00191.82 |       |       | O |

|        |     |     |     |   |    |         |        |        |         |       |        |   |
|--------|-----|-----|-----|---|----|---------|--------|--------|---------|-------|--------|---|
| ANISOU | 243 | OD1 | ASN | A | 53 | 32126   | 23338  | 17418  | -5404   | -2871 | -5005  | O |
| ATOM   | 244 | ND2 | ASN | A | 53 | -9.001  | 27.914 | 38.693 | 1.00180 | .02   |        | N |
| ANISOU | 244 | ND2 | ASN | A | 53 | 30087   | 21355  | 16956  | -5345   | -1580 | -4931  | N |
| ATOM   | 245 | N   | GLU | A | 54 | -11.267 | 26.511 | 41.983 | 1.00203 | .43   |        | N |
| ANISOU | 245 | N   | GLU | A | 54 | 34328   | 25203  | 17764  | -5189   | -2334 | -3897  | N |
| ATOM   | 246 | CA  | GLU | A | 54 | -11.419 | 27.440 | 43.094 | 1.00209 | .80   |        | C |
| ANISOU | 246 | CA  | GLU | A | 54 | 35553   | 25884  | 18275  | -5149   | -1786 | -4291  | C |
| ATOM   | 247 | C   | GLU | A | 54 | -10.086 | 28.117 | 43.396 | 1.00205 | .29   |        | C |
| ANISOU | 247 | C   | GLU | A | 54 | 34982   | 24936  | 18083  | -5243   | -1929 | -5451  | C |
| ATOM   | 248 | O   | GLU | A | 54 | -9.049  | 27.458 | 43.498 | 1.00199 | .44   |        | O |
| ANISOU | 248 | O   | GLU | A | 54 | 34215   | 24162  | 17400  | -5371   | -2837 | -6078  | O |
| ATOM   | 249 | CB  | GLU | A | 54 | -11.959 | 26.725 | 44.332 | 1.00220 | .54   |        | C |
| ANISOU | 249 | CB  | GLU | A | 54 | 37471   | 27562  | 18762  | -5147   | -2194 | -4036  | C |
| ATOM   | 250 | CG  | GLU | A | 54 | -13.330 | 26.097 | 44.129 | 1.00225 | .69   |        | C |
| ANISOU | 250 | CG  | GLU | A | 54 | 38094   | 28559  | 19099  | -5088   | -1959 | -2933  | C |
| ATOM   | 251 | CD  | GLU | A | 54 | -13.843 | 25.394 | 45.370 | 1.00235 | .81   |        | C |
| ANISOU | 251 | CD  | GLU | A | 54 | 39971   | 30126  | 19502  | -5145   | -2268 | -2667  | C |
| ATOM   | 252 | OE1 | GLU | A | 54 | -13.086 | 25.297 | 46.358 | 1.00243 | .65   |        | O |
| ANISOU | 252 | OE1 | GLU | A | 54 | 41461   | 31045  | 20068  | -5187   | -2793 | -3332  | O |
| ATOM   | 253 | OE2 | GLU | A | 54 | -15.006 | 24.939 | 45.356 | 1.00234 | .04   |        | O |
| ANISOU | 253 | OE2 | GLU | A | 54 | 39738   | 30164  | 19022  | -5132   | -1974 | -1820  | O |
| ATOM   | 254 | N   | ARG | A | 55 | -10.128 | 29.438 | 43.536 | 1.00203 | .56   |        | N |
| ANISOU | 254 | N   | ARG | A | 55 | 34768   | 24411  | 18163  | -5166   | -1059 | -5780  | N |
| ATOM   | 255 | CA  | ARG | A | 55 | -8.933  | 30.250 | 43.741 | 1.00199 | .25   |        | C |
| ANISOU | 255 | CA  | ARG | A | 55 | 34135   | 23427  | 18142  | -5240   | -1033 | -6883  | C |
| ATOM   | 256 | C   | ARG | A | 55 | -8.204  | 29.877 | 45.031 | 1.00204 | .23   |        | C |
| ANISOU | 256 | C   | ARG | A | 55 | 35186   | 24053  | 18360  | -5205   | -1867 | -7714  | C |
| ATOM   | 257 | O   | ARG | A | 55 | -7.007  | 30.121 | 45.170 | 1.00205 | .47   |        | O |
| ANISOU | 257 | O   | ARG | A | 55 | 35218   | 23870  | 18981  | -5274   | -2236 | -8761  | O |
| ATOM   | 258 | CB  | ARG | A | 55 | -9.318  | 31.734 | 43.760 | 1.00197 | .31   |        | C |
| ANISOU | 258 | CB  | ARG | A | 55 | 33879   | 22873  | 18217  | -5125   | 50    | -6963  | C |
| ATOM   | 259 | CG  | ARG | A | 55 | -8.147  | 32.708 | 43.724 | 1.00201 | .77   |        | C |
| ANISOU | 259 | CG  | ARG | A | 55 | 34234   | 22899  | 19532  | -5223   | 255   | -8020  | C |
| ATOM   | 260 | CD  | ARG | A | 55 | -8.630  | 34.152 | 43.822 | 1.00208 | .73   |        | C |
| ANISOU | 260 | CD  | ARG | A | 55 | 35160   | 23484  | 20663  | -5088   | 1257  | -8034  | C |
| ATOM   | 261 | NE  | ARG | A | 55 | -7.526  | 35.107 | 43.776 | 1.00221 | .08   |        | N |
| ANISOU | 261 | NE  | ARG | A | 55 | 36495   | 24480  | 23024  | -5201   | 1488  | -9030  | N |
| ATOM   | 262 | CZ  | ARG | A | 55 | -7.670  | 36.423 | 43.899 | 1.00229 | .24   |        | C |
| ANISOU | 262 | CZ  | ARG | A | 55 | 37537   | 25151  | 24413  | -5110   | 2244  | -9259  | C |
| ATOM   | 263 | NH1 | ARG | A | 55 | -8.875  | 36.947 | 44.079 | 1.00228 | .19   |        | N |
| ANISOU | 263 | NH1 | ARG | A | 55 | 37637   | 25194  | 23870  | -4887   | 2806  | -8600  | N |
| ATOM   | 264 | NH2 | ARG | A | 55 | -6.609  | 37.218 | 43.845 | 1.00234 | .20   |        | N |
| ANISOU | 264 | NH2 | ARG | A | 55 | 37915   | 25227  | 25843  | -5243   | 2416  | -10189 | N |
| ATOM   | 265 | N   | GLU | A | 56 | -8.929  | 29.266 | 45.962 | 1.00195 | .55   |        | N |
| ANISOU | 265 | N   | GLU | A | 56 | 19919   | 33593  | 20786  | -9004   | -461  | -6749  | N |
| ATOM   | 266 | CA  | GLU | A | 56 | -8.399  | 28.994 | 47.295 | 1.00218 | .73   |        | C |
| ANISOU | 266 | CA  | GLU | A | 56 | 23042   | 37277  | 22788  | -9257   | -512  | -6745  | C |
| ATOM   | 267 | C   | GLU | A | 56 | -7.461  | 27.787 | 47.387 | 1.00223 | .29   |        | C |
| ANISOU | 267 | C   | GLU | A | 56 | 23537   | 38321  | 22981  | -9300   | -791  | -5925  | C |
| ATOM   | 268 | O   | GLU | A | 56 | -6.562  | 27.613 | 46.563 | 1.00219 | .56   |        | O |
| ANISOU | 268 | O   | GLU | A | 56 | 22915   | 37673  | 22835  | -9275   | -1171 | -5496  | O |
| ATOM   | 269 | CB  | GLU | A | 56 | -9.537  | 28.866 | 48.316 | 1.00224 | .23   |        | C |
| ANISOU | 269 | CB  | GLU | A | 56 | 23882   | 38268  | 23047  | -9190   | 73    | -7059  | C |
| ATOM   | 270 | CG  | GLU | A | 56 | -10.818 | 28.245 | 47.774 | 1.00214 | .63   |        | C |
| ANISOU | 270 | CG  | GLU | A | 56 | 22438   | 36669  | 22443  | -8893   | 549   | -6828  | C |
| ATOM   | 271 | CD  | GLU | A | 56 | -11.756 | 29.270 | 47.157 | 1.00210 | .31   |        | C |
| ANISOU | 271 | CD  | GLU | A | 56 | 21831   | 35436  | 22641  | -8755   | 768   | -7443  | C |
| ATOM   | 272 | OE1 | GLU | A | 56 | -11.301 | 30.394 | 46.854 | 1.00210 | .90   |        | O |
| ANISOU | 272 | OE1 | GLU | A | 56 | 21997   | 35227  | 22908  | -8866   | 493   | -7932  | O |
| ATOM   | 273 | OE2 | GLU | A | 56 | -12.951 | 28.954 | 46.981 | 1.00208 | .70   |        | O |
| ANISOU | 273 | OE2 | GLU | A | 56 | 21448   | 34946  | 22902  | -8539   | 1201  | -7405  | O |
| ATOM   | 274 | N   | GLU | A | 57 | -7.688  | 26.959 | 48.403 | 1.00228 | .02   |        | N |
| ANISOU | 274 | N   | GLU | A | 57 | 24226   | 39517  | 22895  | -9328   | -555  | -5672  | N |
| ATOM   | 275 | CA  | GLU | A | 57 | -6.763  | 25.890 | 48.778 | 1.00224 | .42   |        | C |
| ANISOU | 275 | CA  | GLU | A | 57 | 23723   | 39605  | 21940  | -9412   | -823  | -4943  | C |
| ATOM   | 276 | C   | GLU | A | 57 | -6.758  | 24.700 | 47.817 | 1.00205 | .23   |        | C |
| ANISOU | 276 | C   | GLU | A | 57 | 21025   | 36910  | 20045  | -9169   | -842  | -4176  | C |
| ATOM   | 277 | O   | GLU | A | 57 | -6.080  | 23.702 | 48.065 | 1.00199 | .45   |        | O |
| ANISOU | 277 | O   | GLU | A | 57 | 20218   | 36568  | 18996  | -9195   | -1018 | -3517  | O |
| ATOM   | 278 | CB  | GLU | A | 57 | -7.088  | 25.402 | 50.194 | 1.00237 | .54   |        | C |

|        |     |     |     |   |    |         |        |        |            |       |       |   |
|--------|-----|-----|-----|---|----|---------|--------|--------|------------|-------|-------|---|
| ANISOU | 278 | CB  | GLU | A | 57 | 25580   | 41996  | 22678  | -9470      | -513  | -4883 | C |
| ATOM   | 279 | CG  | GLU | A | 57 | -7.247  | 26.520 | 51.218 | 1.00248.36 |       |       | C |
| ANISOU | 279 | CG  | GLU | A | 57 | 27310   | 43652  | 23402  | -9605      | -445  | -5723 | C |
| ATOM   | 280 | CD  | GLU | A | 57 | -7.836  | 26.037 | 52.530 | 1.00256.05 |       |       | C |
| ANISOU | 280 | CD  | GLU | A | 57 | 28514   | 45318  | 23454  | -9513      | 40    | -5659 | C |
| ATOM   | 281 | OE1 | GLU | A | 57 | -8.085  | 24.821 | 52.662 | 1.00254.36 |       |       | O |
| ANISOU | 281 | OE1 | GLU | A | 57 | 28121   | 45352  | 23171  | -9390      | 316   | -4890 | O |
| ATOM   | 282 | OE2 | GLU | A | 57 | -8.055  | 26.873 | 53.432 | 1.00264.10 |       |       | O |
| ANISOU | 282 | OE2 | GLU | A | 57 | 29899   | 46623  | 23824  | -9530      | 159   | -6365 | O |
| ATOM   | 283 | N   | THR | A | 58 | -7.516  | 24.800 | 46.731 | 1.00196.01 |       |       | N |
| ANISOU | 283 | N   | THR | A | 58 | 19729   | 35065  | 19682  | -8909      | -699  | -4284 | N |
| ATOM   | 284 | CA  | THR | A | 58 | -7.636  | 23.695 | 45.785 | 1.00183.88 |       |       | C |
| ANISOU | 284 | CA  | THR | A | 58 | 17997   | 33201  | 18666  | -8612      | -765  | -3681 | C |
| ATOM   | 285 | C   | THR | A | 58 | -6.322  | 23.367 | 45.077 | 1.00171.94 |       |       | C |
| ANISOU | 285 | C   | THR | A | 58 | 16429   | 31695  | 17207  | -8552      | -1229 | -3183 | C |
| ATOM   | 286 | O   | THR | A | 58 | -5.837  | 22.239 | 45.157 | 1.00169.72 |       |       | O |
| ANISOU | 286 | O   | THR | A | 58 | 16057   | 31665  | 16765  | -8489      | -1348 | -2539 | O |
| ATOM   | 287 | CB  | THR | A | 58 | -8.730  | 23.966 | 44.733 | 1.00178.91 |       |       | C |
| ANISOU | 287 | CB  | THR | A | 58 | 17287   | 31816  | 18874  | -8309      | -613  | -3981 | C |
| ATOM   | 288 | OG1 | THR | A | 58 | -8.555  | 25.278 | 44.185 | 1.00182.31 |       |       | O |
| ANISOU | 288 | OG1 | THR | A | 58 | 17806   | 31903  | 19562  | -8329      | -732  | -4515 | O |
| ATOM   | 289 | CG2 | THR | A | 58 | -10.109 | 23.866 | 45.366 | 1.00170.48 |       |       | C |
| ANISOU | 289 | CG2 | THR | A | 58 | 16151   | 30709  | 17917  | -8296      | -106  | -4220 | C |
| ATOM   | 290 | N   | ARG | A | 59 | -5.754  | 24.361 | 44.399 | 1.00165.82 |       |       | N |
| ANISOU | 290 | N   | ARG | A | 59 | 15677   | 30628  | 16700  | -8552      | -1455 | -3441 | N |
| ATOM   | 291 | CA  | ARG | A | 59 | -4.576  | 24.170 | 43.554 | 1.00169.57 |       |       | C |
| ANISOU | 291 | CA  | ARG | A | 59 | 16056   | 31015  | 17358  | -8407      | -1802 | -2939 | C |
| ATOM   | 292 | C   | ARG | A | 59 | -3.395  | 23.545 | 44.291 | 1.00181.96 |       |       | C |
| ANISOU | 292 | C   | ARG | A | 59 | 17552   | 33196  | 18387  | -8636      | -2061 | -2398 | C |
| ATOM   | 293 | O   | ARG | A | 59 | -2.723  | 22.656 | 43.763 | 1.00161.35 |       |       | O |
| ANISOU | 293 | O   | ARG | A | 59 | 14832   | 30607  | 15869  | -8418      | -2214 | -1753 | O |
| ATOM   | 294 | CB  | ARG | A | 59 | -4.136  | 25.506 | 42.958 | 1.00160.78 |       |       | C |
| ANISOU | 294 | CB  | ARG | A | 59 | 14930   | 29556  | 16603  | -8445      | -1940 | -3284 | C |
| ATOM   | 295 | CG  | ARG | A | 59 | -5.272  | 26.466 | 42.669 | 1.00160.42 |       |       | C |
| ANISOU | 295 | CG  | ARG | A | 59 | 14969   | 29027  | 16956  | -8379      | -1694 | -3980 | C |
| ATOM   | 296 | CD  | ARG | A | 59 | -4.726  | 27.782 | 42.152 | 1.00192.02 |       |       | C |
| ANISOU | 296 | CD  | ARG | A | 59 | 18917   | 32695  | 21347  | -8446      | -1849 | -4239 | C |
| ATOM   | 297 | NE  | ARG | A | 59 | -5.777  | 28.766 | 41.916 | 1.00190.36 |       |       | N |
| ANISOU | 297 | NE  | ARG | A | 59 | 18773   | 32011  | 21543  | -8397      | -1625 | -4908 | N |
| ATOM   | 298 | CZ  | ARG | A | 59 | -5.563  | 29.966 | 41.388 | 1.00187.52 |       |       | C |
| ANISOU | 298 | CZ  | ARG | A | 59 | 18352   | 31237  | 21660  | -8411      | -1699 | -5175 | C |
| ATOM   | 299 | NH1 | ARG | A | 59 | -4.334  | 30.329 | 41.040 | 1.00181.60 |       |       | N |
| ANISOU | 299 | NH1 | ARG | A | 59 | 17444   | 30482  | 21074  | -8477      | -1975 | -4798 | N |
| ATOM   | 300 | NH2 | ARG | A | 59 | -6.574  | 30.804 | 41.207 | 1.00189.31 |       |       | N |
| ANISOU | 300 | NH2 | ARG | A | 59 | 18629   | 31027  | 22272  | -8353      | -1485 | -5770 | N |
| ATOM   | 301 | N   | GLU | A | 60 | -3.153  | 24.022 | 45.507 | 1.00195.66 |       |       | N |
| ANISOU | 301 | N   | GLU | A | 60 | 19371   | 35420  | 19551  | -9042      | -2131 | -2685 | N |
| ATOM   | 302 | CA  | GLU | A | 60 | -2.000  | 23.606 | 46.298 | 1.00207.96 |       |       | C |
| ANISOU | 302 | CA  | GLU | A | 60 | 20870   | 37576  | 20570  | -9299      | -2469 | -2245 | C |
| ATOM   | 303 | C   | GLU | A | 60 | -1.995  | 22.109 | 46.591 | 1.00211.43 |       |       | C |
| ANISOU | 303 | C   | GLU | A | 60 | 21243   | 38358  | 20735  | -9171      | -2386 | -1546 | C |
| ATOM   | 304 | O   | GLU | A | 60 | -1.043  | 21.405 | 46.254 | 1.00209.77 |       |       | O |
| ANISOU | 304 | O   | GLU | A | 60 | 20864   | 38247  | 20594  | -9082      | -2632 | -888  | O |
| ATOM   | 305 | CB  | GLU | A | 60 | -1.957  | 24.391 | 47.609 | 1.00222.18 |       |       | C |
| ANISOU | 305 | CB  | GLU | A | 60 | 22866   | 39830  | 21723  | -9695      | -2581 | -2808 | C |
| ATOM   | 306 | CG  | GLU | A | 60 | -1.929  | 25.897 | 47.416 | 1.00227.97 |       |       | C |
| ANISOU | 306 | CG  | GLU | A | 60 | 23652   | 40185  | 22781  | -9853      | -2720 | -3542 | C |
| ATOM   | 307 | CD  | GLU | A | 60 | -2.288  | 26.653 | 48.678 | 1.00236.97 |       |       | C |
| ANISOU | 307 | CD  | GLU | A | 60 | 25088   | 41671  | 23279  | -10127     | -2731 | -4292 | C |
| ATOM   | 308 | OE1 | GLU | A | 60 | -2.427  | 26.010 | 49.740 | 1.00234.61 |       |       | O |
| ANISOU | 308 | OE1 | GLU | A | 60 | 24966   | 41993  | 22183  | -10188     | -2647 | -4176 | O |
| ATOM   | 309 | OE2 | GLU | A | 60 | -2.437  | 27.891 | 48.605 | 1.00243.69 |       |       | O |
| ANISOU | 309 | OE2 | GLU | A | 60 | 26012   | 42167  | 24412  | -10243     | -2813 | -4992 | O |
| ATOM   | 310 | N   | GLU | A | 61 | -3.063  | 21.628 | 47.215 | 1.00215.81 |       |       | N |
| ANISOU | 310 | N   | GLU | A | 61 | 21895   | 39063  | 21039  | -9144      | -2013 | -1650 | N |
| ATOM   | 311 | CA  | GLU | A | 61 | -3.141  | 20.229 | 47.618 | 1.00211.52 |       |       | C |
| ANISOU | 311 | CA  | GLU | A | 61 | 21253   | 38830  | 20284  | -9052      | -1906 | -966  | C |
| ATOM   | 312 | C   | GLU | A | 61 | -3.383  | 19.285 | 46.445 | 1.00186.43 |       |       | C |
| ANISOU | 312 | C   | GLU | A | 61 | 17908   | 35110  | 17815  | -8654      | -1878 | -530  | C |
| ATOM   | 313 | O   | GLU | A | 61 | -2.983  | 18.123 | 46.490 | 1.00169.58 |       |       | O |

|        |     |     |     |   |    |        |        |        |            |       |       |   |
|--------|-----|-----|-----|---|----|--------|--------|--------|------------|-------|-------|---|
| ANISOU | 313 | O   | GLU | A | 61 | 15640  | 33133  | 15659  | -8550      | -1968 | 146   | O |
| ATOM   | 314 | CB  | GLU | A | 61 | -4.222 | 20.035 | 48.682 | 1.00225.09 |       |       | C |
| ANISOU | 314 | CB  | GLU | A | 61 | 23081  | 40872  | 21573  | -9125      | -1456 | -1135 | C |
| ATOM   | 315 | CG  | GLU | A | 61 | -3.941 | 20.761 | 49.985 | 1.00234.46 |       |       | C |
| ANISOU | 315 | CG  | GLU | A | 61 | 24519  | 42712  | 21855  | -9435      | -1501 | -1516 | C |
| ATOM   | 316 | CD  | GLU | A | 61 | -4.961 | 20.440 | 51.057 | 1.00242.19 |       |       | C |
| ANISOU | 316 | CD  | GLU | A | 61 | 25618  | 44090  | 22312  | -9407      | -963  | -1541 | C |
| ATOM   | 317 | OE1 | GLU | A | 61 | -5.838 | 19.586 | 50.807 | 1.00240.47 |       |       | O |
| ANISOU | 317 | OE1 | GLU | A | 61 | 25202  | 43625  | 22539  | -9195      | -571  | -1164 | O |
| ATOM   | 318 | OE2 | GLU | A | 61 | -4.886 | 21.042 | 52.148 | 1.00250.52 |       |       | O |
| ANISOU | 318 | OE2 | GLU | A | 61 | 26963  | 45692  | 22531  | -9567      | -939  | -1929 | O |
| ATOM   | 319 | N   | ALA | A | 62 | -4.037 | 19.786 | 45.400 | 1.00187.07 |       |       | N |
| ANISOU | 319 | N   | ALA | A | 62 | 18020  | 34541  | 18520  | -8405      | -1790 | -937  | N |
| ATOM   | 320 | CA  | ALA | A | 62 | -4.361 | 18.967 | 44.234 | 1.00186.97 |       |       | C |
| ANISOU | 320 | CA  | ALA | A | 62 | 17928  | 33960  | 19154  | -7961      | -1833 | -658  | C |
| ATOM   | 321 | C   | ALA | A | 62 | -3.111 | 18.343 | 43.624 | 1.00158.41 |       |       | C |
| ANISOU | 321 | C   | ALA | A | 62 | 14237  | 30383  | 15569  | -7759      | -2157 | -49   | C |
| ATOM   | 322 | O   | ALA | A | 62 | -3.111 | 17.172 | 43.250 | 1.00157.19 |       |       | O |
| ANISOU | 322 | O   | ALA | A | 62 | 14005  | 30072  | 15648  | -7475      | -2225 | 426   | O |
| ATOM   | 323 | CB  | ALA | A | 62 | -5.106 | 19.789 | 43.195 | 1.00156.96 |       |       | C |
| ANISOU | 323 | CB  | ALA | A | 62 | 14218  | 29502  | 15918  | -7713      | -1774 | -1226 | C |
| ATOM   | 324 | N   | VAL | A | 63 | -2.047 | 19.133 | 43.534 | 1.00158.79 |       |       | N |
| ANISOU | 324 | N   | VAL | A | 63 | 14280  | 30606  | 15447  | -7892      | -2353 | -52   | N |
| ATOM   | 325 | CA  | VAL | A | 63 | -0.761 | 18.629 | 43.080 | 1.00171.82 |       |       | C |
| ANISOU | 325 | CA  | VAL | A | 63 | 15803  | 32361  | 17119  | -7724      | -2606 | 587   | C |
| ATOM   | 326 | C   | VAL | A | 63 | -0.234 | 17.604 | 44.078 | 1.00180.85 |       |       | C |
| ANISOU | 326 | C   | VAL | A | 63 | 16816  | 34070  | 17827  | -7934      | -2706 | 1176  | C |
| ATOM   | 327 | O   | VAL | A | 63 | 0.288  | 16.556 | 43.695 | 1.00182.53 |       |       | O |
| ANISOU | 327 | O   | VAL | A | 63 | 16921  | 34251  | 18182  | -7659      | -2808 | 1785  | O |
| ATOM   | 328 | CB  | VAL | A | 63 | 0.258  | 19.772 | 42.919 | 1.00169.70 |       |       | C |
| ANISOU | 328 | CB  | VAL | A | 63 | 15461  | 32164  | 16855  | -7895      | -2786 | 509   | C |
| ATOM   | 329 | CG1 | VAL | A | 63 | 1.665  | 19.221 | 42.719 | 1.00163.40 |       |       | C |
| ANISOU | 329 | CG1 | VAL | A | 63 | 14444  | 31587  | 16054  | -7797      | -3018 | 1270  | C |
| ATOM   | 330 | CG2 | VAL | A | 63 | -0.143 | 20.676 | 41.765 | 1.00155.89 |       |       | C |
| ANISOU | 330 | CG2 | VAL | A | 63 | 13810  | 29820  | 15602  | -7592      | -2673 | 100   | C |
| ATOM   | 331 | N   | ARG | A | 64 | -0.389 | 17.912 | 45.361 | 1.00191.38 |       |       | N |
| ANISOU | 331 | N   | ARG | A | 64 | 18185  | 35922  | 18607  | -8381      | -2672 | 987   | N |
| ATOM   | 332 | CA  | ARG | A | 64 | 0.051  | 17.022 | 46.427 | 1.00209.22 |       |       | C |
| ANISOU | 332 | CA  | ARG | A | 64 | 20352  | 38789  | 20354  | -8586      | -2758 | 1543  | C |
| ATOM   | 333 | C   | ARG | A | 64 | -0.727 | 15.710 | 46.386 | 1.00195.67 |       |       | C |
| ANISOU | 333 | C   | ARG | A | 64 | 18567  | 36915  | 18862  | -8341      | -2534 | 1938  | C |
| ATOM   | 334 | O   | ARG | A | 64 | -0.153 | 14.634 | 46.545 | 1.00202.25 |       |       | O |
| ANISOU | 334 | O   | ARG | A | 64 | 19242  | 37939  | 19662  | -8262      | -2658 | 2635  | O |
| ATOM   | 335 | CB  | ARG | A | 64 | -0.115 | 17.699 | 47.791 | 1.00229.40 |       |       | C |
| ANISOU | 335 | CB  | ARG | A | 64 | 23054  | 41927  | 22180  | -9026      | -2739 | 1162  | C |
| ATOM   | 336 | CG  | ARG | A | 64 | 0.447  | 16.905 | 48.959 | 1.00233.43 |       |       | C |
| ANISOU | 336 | CG  | ARG | A | 64 | 23511  | 43153  | 22027  | -9230      | -2881 | 1745  | C |
| ATOM   | 337 | CD  | ARG | A | 64 | 0.209  | 17.620 | 50.278 | 1.00236.89 |       |       | C |
| ANISOU | 337 | CD  | ARG | A | 64 | 24198  | 44175  | 21632  | -9566      | -2862 | 1282  | C |
| ATOM   | 338 | NE  | ARG | A | 64 | -1.215 | 17.801 | 50.545 | 1.00245.38 |       |       | N |
| ANISOU | 338 | NE  | ARG | A | 64 | 25444  | 45130  | 22660  | -9488      | -2327 | 821   | N |
| ATOM   | 339 | CZ  | ARG | A | 64 | -1.975 | 16.910 | 51.172 | 1.00264.11 |       |       | C |
| ANISOU | 339 | CZ  | ARG | A | 64 | 27795  | 47743  | 24814  | -9398      | -1932 | 1199  | C |
| ATOM   | 340 | NH1 | ARG | A | 64 | -1.449 | 15.770 | 51.600 | 1.00270.38 |       |       | N |
| ANISOU | 340 | NH1 | ARG | A | 64 | 28431  | 48911  | 25390  | -9380      | -2034 | 2029  | N |
| ATOM   | 341 | NH2 | ARG | A | 64 | -3.263 | 17.156 | 51.370 | 1.00273.62 |       |       | N |
| ANISOU | 341 | NH2 | ARG | A | 64 | 29091  | 48791  | 26080  | -9315      | -1413 | 800   | N |
| ATOM   | 342 | N   | GLU | A | 65 | -2.034 | 15.806 | 46.166 | 1.00175.23 |       |       | N |
| ANISOU | 342 | N   | GLU | A | 65 | 16054  | 33931  | 16592  | -8224      | -2227 | 1511  | N |
| ATOM   | 343 | CA  | GLU | A | 65 | -2.883 | 14.624 | 46.066 | 1.00169.38 |       |       | C |
| ANISOU | 343 | CA  | GLU | A | 65 | 15186  | 32906  | 16264  | -8002      | -2049 | 1849  | C |
| ATOM   | 344 | C   | GLU | A | 65 | -2.504 | 13.793 | 44.850 | 1.00166.04 |       |       | C |
| ANISOU | 344 | C   | GLU | A | 65 | 14695  | 31948  | 16445  | -7550      | -2297 | 2191  | C |
| ATOM   | 345 | O   | GLU | A | 65 | -2.573 | 12.565 | 44.878 | 1.00164.26 |       |       | O |
| ANISOU | 345 | O   | GLU | A | 65 | 14312  | 31620  | 16478  | -7391      | -2337 | 2728  | O |
| ATOM   | 346 | CB  | GLU | A | 65 | -4.353 | 15.028 | 45.980 | 1.00166.96 |       |       | C |
| ANISOU | 346 | CB  | GLU | A | 65 | 14923  | 32200  | 16316  | -7963      | -1712 | 1289  | C |
| ATOM   | 347 | CG  | GLU | A | 65 | -4.867 | 15.729 | 47.220 | 1.00184.43 |       |       | C |
| ANISOU | 347 | CG  | GLU | A | 65 | 17224  | 34929  | 17922  | -8315      | -1368 | 965   | C |
| ATOM   | 348 | CD  | GLU | A | 65 | -6.199 | 16.404 | 46.988 | 1.00196.30 |       |       | C |

|        |     |     |     |   |    |        |        |        |            |       |      |   |
|--------|-----|-----|-----|---|----|--------|--------|--------|------------|-------|------|---|
| ANISOU | 348 | CD  | GLU | A | 65 | 18764  | 35988  | 19832  | -8253      | -1034 | 325  | C |
| ATOM   | 349 | OE1 | GLU | A | 65 | -6.906 | 16.012 | 46.036 | 1.00167.84 |       |      | O |
| ANISOU | 349 | OE1 | GLU | A | 65 | 15046  | 31694  | 17032  | -7959      | -1062 | 279  | O |
| ATOM   | 350 | OE2 | GLU | A | 65 | -6.537 | 17.331 | 47.752 | 1.00202.63 |       |      | O |
| ANISOU | 350 | OE2 | GLU | A | 65 | 19716  | 37111  | 20162  | -8474      | -775  | -152 | O |
| ATOM   | 351 | N   | LEU | A | 66 | -2.106 | 14.474 | 43.781 | 1.00166.82 |       |      | N |
| ANISOU | 351 | N   | LEU | A | 66 | 14922  | 31695  | 16769  | -7306      | -2453 | 1885 | N |
| ATOM   | 352 | CA  | LEU | A | 66 | -1.666 | 13.798 | 42.570 | 1.00166.57 |       |      | C |
| ANISOU | 352 | CA  | LEU | A | 66 | 14912  | 31195  | 17183  | -6778      | -2667 | 2159 | C |
| ATOM   | 353 | C   | LEU | A | 66 | -0.303 | 13.161 | 42.800 | 1.00174.96 |       |      | C |
| ANISOU | 353 | C   | LEU | A | 66 | 15828  | 32664  | 17986  | -6777      | -2850 | 2876 | C |
| ATOM   | 354 | O   | LEU | A | 66 | -0.103 | 11.984 | 42.505 | 1.00158.34 |       |      | O |
| ANISOU | 354 | O   | LEU | A | 66 | 13642  | 30381  | 16139  | -6473      | -2961 | 3358 | O |
| ATOM   | 355 | CB  | LEU | A | 66 | -1.601 | 14.781 | 41.399 | 1.00153.26 |       |      | C |
| ANISOU | 355 | CB  | LEU | A | 66 | 13422  | 29092  | 15719  | -6470      | -2711 | 1695 | C |
| ATOM   | 356 | CG  | LEU | A | 66 | -1.323 | 14.176 | 40.022 | 1.00150.72 |       |      | C |
| ANISOU | 356 | CG  | LEU | A | 66 | 13230  | 28245  | 15791  | -5787      | -2887 | 1865 | C |
| ATOM   | 357 | CD1 | LEU | A | 66 | -2.437 | 13.223 | 39.621 | 1.00150.31 |       |      | C |
| ANISOU | 357 | CD1 | LEU | A | 66 | 13232  | 27633  | 16246  | -5474      | -2981 | 1733 | C |
| ATOM   | 358 | CD2 | LEU | A | 66 | -1.151 | 15.268 | 38.981 | 1.00148.34 |       |      | C |
| ANISOU | 358 | CD2 | LEU | A | 66 | 13123  | 27660  | 15579  | -5488      | -2866 | 1502 | C |
| ATOM   | 359 | N   | GLN | A | 67 | 0.626  | 13.948 | 43.335 | 1.00181.58 |       |      | N |
| ANISOU | 359 | N   | GLN | A | 67 | 16610  | 34007  | 18376  | -7117      | -2917 | 2936 | N |
| ATOM   | 360 | CA  | GLN | A | 67 | 1.971  | 13.474 | 43.642 | 1.00186.01 |       |      | C |
| ANISOU | 360 | CA  | GLN | A | 67 | 16972  | 34986  | 18716  | -7176      | -3123 | 3628 | C |
| ATOM   | 361 | C   | GLN | A | 67 | 1.920  | 12.263 | 44.569 | 1.00183.43 |       |      | C |
| ANISOU | 361 | C   | GLN | A | 67 | 16492  | 34998  | 18204  | -7318      | -3138 | 4194 | C |
| ATOM   | 362 | O   | GLN | A | 67 | 2.658  | 11.293 | 44.384 | 1.00180.95 |       |      | O |
| ANISOU | 362 | O   | GLN | A | 67 | 16022  | 34701  | 18031  | -7093      | -3273 | 4840 | O |
| ATOM   | 363 | CB  | GLN | A | 67 | 2.799  | 14.599 | 44.273 | 1.00193.42 |       |      | C |
| ANISOU | 363 | CB  | GLN | A | 67 | 17841  | 36399  | 19251  | -7624      | -3269 | 3513 | C |
| ATOM   | 364 | CG  | GLN | A | 67 | 4.235  | 14.226 | 44.615 | 1.00201.55 |       |      | C |
| ANISOU | 364 | CG  | GLN | A | 67 | 18602  | 37850  | 20126  | -7726      | -3546 | 4231 | C |
| ATOM   | 365 | CD  | GLN | A | 67 | 4.383  | 13.674 | 46.020 | 1.00208.99 |       |      | C |
| ANISOU | 365 | CD  | GLN | A | 67 | 19455  | 39443  | 20510  | -8136      | -3678 | 4575 | C |
| ATOM   | 366 | OE1 | GLN | A | 67 | 3.486  | 13.814 | 46.851 | 1.00213.20 |       |      | O |
| ANISOU | 366 | OE1 | GLN | A | 67 | 20146  | 40197  | 20664  | -8395      | -3533 | 4221 | O |
| ATOM   | 367 | NE2 | GLN | A | 67 | 5.518  | 13.040 | 46.291 | 1.00211.07 |       |      | N |
| ANISOU | 367 | NE2 | GLN | A | 67 | 19461  | 40027  | 20707  | -8156      | -3930 | 5308 | N |
| ATOM   | 368 | N   | GLU | A | 68 | 1.039  | 12.329 | 45.563 | 1.00182.71 |       |      | N |
| ANISOU | 368 | N   | GLU | A | 68 | 16438  | 35171  | 17812  | -7656      | -2957 | 3984 | N |
| ATOM   | 369 | CA  | GLU | A | 68 | 0.833  | 11.222 | 46.486 | 1.00187.76 |       |      | C |
| ANISOU | 369 | CA  | GLU | A | 68 | 16924  | 36130  | 18288  | -7776      | -2887 | 4558 | C |
| ATOM   | 370 | C   | GLU | A | 68 | 0.273  | 10.017 | 45.743 | 1.00183.11 |       |      | C |
| ANISOU | 370 | C   | GLU | A | 68 | 16241  | 34915  | 18419  | -7348      | -2856 | 4833 | C |
| ATOM   | 371 | O   | GLU | A | 68 | 0.673  | 8.882  | 45.992 | 1.00186.33 |       |      | O |
| ANISOU | 371 | O   | GLU | A | 68 | 16452  | 35406  | 18938  | -7261      | -2946 | 5525 | O |
| ATOM   | 372 | CB  | GLU | A | 68 | -0.118 | 11.637 | 47.609 | 1.00195.93 |       |      | C |
| ANISOU | 372 | CB  | GLU | A | 68 | 18044  | 37538  | 18864  | -8132      | -2592 | 4251 | C |
| ATOM   | 373 | CG  | GLU | A | 68 | -0.465 | 10.524 | 48.582 | 1.00205.47 |       |      | C |
| ANISOU | 373 | CG  | GLU | A | 68 | 19079  | 39076  | 19912  | -8217      | -2417 | 4905 | C |
| ATOM   | 374 | CD  | GLU | A | 68 | -1.492 | 10.955 | 49.610 | 1.00215.48 |       |      | C |
| ANISOU | 374 | CD  | GLU | A | 68 | 20449  | 40691  | 20733  | -8460      | -2010 | 4619 | C |
| ATOM   | 375 | OE1 | GLU | A | 68 | -1.851 | 12.152 | 49.626 | 1.00218.03 |       |      | O |
| ANISOU | 375 | OE1 | GLU | A | 68 | 20996  | 41029  | 20816  | -8589      | -1911 | 3867 | O |
| ATOM   | 376 | OE2 | GLU | A | 68 | -1.942 | 10.098 | 50.399 | 1.00220.93 |       |      | O |
| ANISOU | 376 | OE2 | GLU | A | 68 | 20985  | 41628  | 21333  | -8490      | -1755 | 5179 | O |
| ATOM   | 377 | N   | MET | A | 69 | -0.650 | 10.278 | 44.824 | 1.00176.99 |       |      | N |
| ANISOU | 377 | N   | MET | A | 69 | 15603  | 33478  | 18168  | -7072      | -2780 | 4272 | N |
| ATOM   | 378 | CA  | MET | A | 69 | -1.275 | 9.224  | 44.036 | 1.00175.33 |       |      | C |
| ANISOU | 378 | CA  | MET | A | 69 | 15340  | 32562  | 18715  | -6641      | -2860 | 4383 | C |
| ATOM   | 379 | C   | MET | A | 69 | -0.288 | 8.565  | 43.078 | 1.00173.52 |       |      | C |
| ANISOU | 379 | C   | MET | A | 69 | 15137  | 32057  | 18735  | -6160      | -3144 | 4729 | C |
| ATOM   | 380 | O   | MET | A | 69 | -0.297 | 7.346  | 42.914 | 1.00164.67 |       |      | O |
| ANISOU | 380 | O   | MET | A | 69 | 13888  | 30635  | 18047  | -5902      | -3277 | 5165 | O |
| ATOM   | 381 | CB  | MET | A | 69 | -2.466 | 9.783  | 43.257 | 1.00173.44 |       |      | C |
| ANISOU | 381 | CB  | MET | A | 69 | 15265  | 31685  | 18947  | -6451      | -2798 | 3639 | C |
| ATOM   | 382 | CG  | MET | A | 69 | -3.115 | 8.791  | 42.310 | 1.00175.14 |       |      | C |
| ANISOU | 382 | CG  | MET | A | 69 | 15470  | 31076  | 20001  | -5962      | -3022 | 3623 | C |
| ATOM   | 383 | SD  | MET | A | 69 | -4.519 | 9.516  | 41.448 | 1.00167.84 |       |      | S |

|        |     |     |     |   |    |        |        |        |            |       |      |   |
|--------|-----|-----|-----|---|----|--------|--------|--------|------------|-------|------|---|
| ANISOU | 383 | SD  | MET | A | 69 | 14720  | 29427  | 19626  | -5763      | -3034 | 2746 | S |
| ATOM   | 384 | CE  | MET | A | 69 | -5.582 | 9.923  | 42.829 | 1.00162.17 |       |      | C |
| ANISOU | 384 | CE  | MET | A | 69 | 13749  | 29080  | 18786  | -6360      | -2565 | 2688 | C |
| ATOM   | 385 | N   | VAL | A | 70 | 0.562  | 9.377  | 42.455 | 1.00172.83 |       |      | N |
| ANISOU | 385 | N   | VAL | A | 70 | 15199  | 32054  | 18414  | -6017      | -3212 | 4559 | N |
| ATOM   | 386 | CA  | VAL | A | 70 | 1.524  | 8.888  | 41.469 | 1.00172.21 |       |      | C |
| ANISOU | 386 | CA  | VAL | A | 70 | 15171  | 31734  | 18528  | -5475      | -3386 | 4879 | C |
| ATOM   | 387 | C   | VAL | A | 70 | 2.409  | 7.772  | 42.023 | 1.00170.62 |       |      | C |
| ANISOU | 387 | C   | VAL | A | 70 | 14703  | 31837  | 18286  | -5496      | -3491 | 5713 | C |
| ATOM   | 388 | O   | VAL | A | 70 | 2.598  | 6.739  | 41.378 | 1.00172.03 |       |      | O |
| ANISOU | 388 | O   | VAL | A | 70 | 14888  | 31599  | 18877  | -5001      | -3627 | 5998 | O |
| ATOM   | 389 | CB  | VAL | A | 70 | 2.408  | 10.032 | 40.916 | 1.00174.27 |       |      | C |
| ANISOU | 389 | CB  | VAL | A | 70 | 15530  | 32160  | 18525  | -5395      | -3351 | 4730 | C |
| ATOM   | 390 | CG1 | VAL | A | 70 | 3.574  | 9.473  | 40.124 | 1.00177.75 |       |      | C |
| ANISOU | 390 | CG1 | VAL | A | 70 | 15942  | 32508  | 19087  | -4859      | -3432 | 5258 | C |
| ATOM   | 391 | CG2 | VAL | A | 70 | 1.584  | 10.971 | 40.049 | 1.00172.07 |       |      | C |
| ANISOU | 391 | CG2 | VAL | A | 70 | 15540  | 31426  | 18411  | -5180      | -3273 | 3974 | C |
| ATOM   | 392 | N   | GLN | A | 71 | 2.936  | 7.978  | 43.224 | 1.00168.70 |       |      | N |
| ANISOU | 392 | N   | GLN | A | 71 | 14246  | 32308  | 17543  | -6044      | -3461 | 6082 | N |
| ATOM   | 393 | CA  | GLN | A | 71 | 3.783  | 6.977  | 43.858 | 1.00180.11 |       |      | C |
| ANISOU | 393 | CA  | GLN | A | 71 | 15413  | 34107  | 18913  | -6110      | -3579 | 6918 | C |
| ATOM   | 394 | C   | GLN | A | 71 | 2.971  | 5.860  | 44.501 | 1.00183.56 |       |      | C |
| ANISOU | 394 | C   | GLN | A | 71 | 15702  | 34439  | 19606  | -6198      | -3532 | 7239 | C |
| ATOM   | 395 | O   | GLN | A | 71 | 3.404  | 4.709  | 44.526 | 1.00187.59 |       |      | O |
| ANISOU | 395 | O   | GLN | A | 71 | 16019  | 34849  | 20408  | -5993      | -3648 | 7874 | O |
| ATOM   | 396 | CB  | GLN | A | 71 | 4.697  | 7.627  | 44.897 | 1.00205.16 |       |      | C |
| ANISOU | 396 | CB  | GLN | A | 71 | 18425  | 38088  | 21437  | -6635      | -3654 | 7201 | C |
| ATOM   | 397 | CG  | GLN | A | 71 | 5.905  | 8.329  | 44.303 | 1.00221.47 |       |      | C |
| ANISOU | 397 | CG  | GLN | A | 71 | 20440  | 40241  | 23466  | -6508      | -3773 | 7279 | C |
| ATOM   | 398 | CD  | GLN | A | 71 | 6.932  | 7.360  | 43.747 | 1.00227.35 |       |      | C |
| ANISOU | 398 | CD  | GLN | A | 71 | 20988  | 40846  | 24548  | -6054      | -3870 | 7995 | C |
| ATOM   | 399 | OE1 | GLN | A | 71 | 6.820  | 6.146  | 43.924 | 1.00231.57 |       |      | O |
| ANISOU | 399 | OE1 | GLN | A | 71 | 21417  | 41263  | 25304  | -5891      | -3905 | 8448 | O |
| ATOM   | 400 | NE2 | GLN | A | 71 | 7.945  | 7.894  | 43.074 | 1.00225.11 |       |      | N |
| ANISOU | 400 | NE2 | GLN | A | 71 | 20623  | 40551  | 24358  | -5828      | -3887 | 8138 | N |
| ATOM   | 401 | N   | ALA | A | 72 | 1.797  | 6.205  | 45.022 | 1.00188.86 |       |      | N |
| ANISOU | 401 | N   | ALA | A | 72 | 16426  | 35108  | 20224  | -6488      | -3335 | 6843 | N |
| ATOM   | 402 | CA  | ALA | A | 72 | 0.931  | 5.228  | 45.674 | 1.00197.59 |       |      | C |
| ANISOU | 402 | CA  | ALA | A | 72 | 17326  | 36101  | 21651  | -6589      | -3214 | 7202 | C |
| ATOM   | 403 | C   | ALA | A | 72 | 0.521  | 4.131  | 44.700 | 1.00199.59 |       |      | C |
| ANISOU | 403 | C   | ALA | A | 72 | 17533  | 35475  | 22829  | -6072      | -3393 | 7264 | C |
| ATOM   | 404 | O   | ALA | A | 72 | 0.534  | 2.948  | 45.042 | 1.00204.91 |       |      | O |
| ANISOU | 404 | O   | ALA | A | 72 | 17942  | 36025  | 23892  | -6018      | -3452 | 7904 | O |
| ATOM   | 405 | CB  | ALA | A | 72 | -0.296 | 5.905  | 46.263 | 1.00176.66 |       |      | C |
| ANISOU | 405 | CB  | ALA | A | 72 | 14732  | 33539  | 18852  | -6913      | -2903 | 6727 | C |
| ATOM   | 406 | N   | GLN | A | 73 | 0.160  | 4.531  | 43.485 | 1.00192.84 |       |      | N |
| ANISOU | 406 | N   | GLN | A | 73 | 16949  | 33994  | 22328  | -5671      | -3515 | 6590 | N |
| ATOM   | 407 | CA  | GLN | A | 73 | -0.218 | 3.577  | 42.450 | 1.00188.25 |       |      | C |
| ANISOU | 407 | CA  | GLN | A | 73 | 16422  | 32529  | 22575  | -5103      | -3792 | 6497 | C |
| ATOM   | 408 | C   | GLN | A | 73 | 1.019  | 2.894  | 41.877 | 1.00188.59 |       |      | C |
| ANISOU | 408 | C   | GLN | A | 73 | 16496  | 32517  | 22643  | -4650      | -4001 | 6934 | C |
| ATOM   | 409 | O   | GLN | A | 73 | 0.929  | 1.818  | 41.286 | 1.00199.97 |       |      | O |
| ANISOU | 409 | O   | GLN | A | 73 | 17928  | 33324  | 24726  | -4192      | -4255 | 7063 | O |
| ATOM   | 410 | CB  | GLN | A | 73 | -1.007 | 4.268  | 41.336 | 1.00180.01 |       |      | C |
| ANISOU | 410 | CB  | GLN | A | 73 | 15717  | 30874  | 21803  | -4768      | -3896 | 5611 | C |
| ATOM   | 411 | CG  | GLN | A | 73 | -2.204 | 5.072  | 41.823 | 1.00178.77 |       |      | C |
| ANISOU | 411 | CG  | GLN | A | 73 | 15524  | 30753  | 21647  | -5182      | -3661 | 5138 | C |
| ATOM   | 412 | CD  | GLN | A | 73 | -3.245 | 4.220  | 42.523 | 1.00189.87 |       |      | C |
| ANISOU | 412 | CD  | GLN | A | 73 | 16568  | 31894  | 23679  | -5409      | -3590 | 5440 | C |
| ATOM   | 413 | OE1 | GLN | A | 73 | -3.362 | 3.022  | 42.263 | 1.00205.03 |       |      | O |
| ANISOU | 413 | OE1 | GLN | A | 73 | 18320  | 33275  | 26306  | -5142      | -3851 | 5775 | O |
| ATOM   | 414 | NE2 | GLN | A | 73 | -4.010 | 4.837  | 43.417 | 1.00185.32 |       |      | N |
| ANISOU | 414 | NE2 | GLN | A | 73 | 15854  | 31670  | 22888  | -5879      | -3216 | 5343 | N |
| ATOM   | 415 | N   | ALA | A | 74 | 2.173  | 3.526  | 42.057 | 1.00175.06 |       |      | N |
| ANISOU | 415 | N   | ALA | A | 74 | 14799  | 31435  | 20282  | -4765      | -3907 | 7159 | N |
| ATOM   | 416 | CA  | ALA | A | 74 | 3.435  | 2.946  | 41.621 | 1.00173.77 |       |      | C |
| ANISOU | 416 | CA  | ALA | A | 74 | 14591  | 31308  | 20125  | -4362      | -4026 | 7677 | C |
| ATOM   | 417 | C   | ALA | A | 74 | 3.937  | 1.945  | 42.654 | 1.00192.45 |       |      | C |
| ANISOU | 417 | C   | ALA | A | 74 | 16561  | 34040  | 22521  | -4636      | -4056 | 8563 | C |
| ATOM   | 418 | O   | ALA | A | 74 | 4.776  | 1.096  | 42.353 | 1.00200.52 |       |      | O |

|        |     |     |     |   |    |       |        |        |            |       |       |   |
|--------|-----|-----|-----|---|----|-------|--------|--------|------------|-------|-------|---|
| ANISOU | 418 | O   | ALA | A | 74 | 17475 | 34935  | 23777  | -4267      | -4181 | 9078  | O |
| ATOM   | 419 | CB  | ALA | A | 74 | 4.468 | 4.034  | 41.392 | 1.00169.31 |       |       | C |
| ANISOU | 419 | CB  | ALA | A | 74 | 14108 | 31220  | 19004  | -4385      | -3919 | 7639  | C |
| ATOM   | 420 | N   | ALA | A | 75 | 3.411 | 2.048  | 43.871 | 1.00196.98 |       |       | N |
| ANISOU | 420 | N   | ALA | A | 75 | 16931 | 35074  | 22837  | -5243      | -3916 | 8758  | N |
| ATOM   | 421 | CA  | ALA | A | 75 | 3.817 | 1.170  | 44.964 | 1.00198.43 |       |       | C |
| ANISOU | 421 | CA  | ALA | A | 75 | 16748 | 35692  | 22953  | -5529      | -3917 | 9646  | C |
| ATOM   | 422 | C   | ALA | A | 75 | 3.325 | -0.258 | 44.752 | 1.00203.47 |       |       | C |
| ANISOU | 422 | C   | ALA | A | 75 | 17198 | 35642  | 24471  | -5219      | -4042 | 10011 | C |
| ATOM   | 423 | O   | ALA | A | 75 | 3.887 | -1.204 | 45.303 | 1.00201.18 |       |       | O |
| ANISOU | 423 | O   | ALA | A | 75 | 16602 | 35517  | 24319  | -5246      | -4104 | 10826 | O |
| ATOM   | 424 | CB  | ALA | A | 75 | 3.318 | 1.713  | 46.296 | 1.00195.70 |       |       | C |
| ANISOU | 424 | CB  | ALA | A | 75 | 16309 | 36045  | 22004  | -6172      | -3691 | 9728  | C |
| ATOM   | 425 | N   | SER | A | 76 | 2.276 | -0.407 | 43.948 | 1.00210.64 |       |       | N |
| ANISOU | 425 | N   | SER | A | 76 | 18267 | 35738  | 26028  | -4924      | -4125 | 9410  | N |
| ATOM   | 426 | CA  | SER | A | 76 | 1.718 | -1.723 | 43.654 | 1.00218.91 |       |       | C |
| ANISOU | 426 | CA  | SER | A | 76 | 19131 | 35978  | 28067  | -4617      | -4341 | 9641  | C |
| ATOM   | 427 | C   | SER | A | 76 | 2.655 | -2.540 | 42.767 | 1.00226.05 |       |       | C |
| ANISOU | 427 | C   | SER | A | 76 | 20120 | 36449  | 29319  | -3980      | -4628 | 9833  | C |
| ATOM   | 428 | O   | SER | A | 76 | 2.519 | -3.759 | 42.662 | 1.00235.67 |       |       | O |
| ANISOU | 428 | O   | SER | A | 76 | 21138 | 37081  | 31325  | -3726      | -4847 | 10194 | O |
| ATOM   | 429 | CB  | SER | A | 76 | 0.343 | -1.593 | 42.995 | 1.00212.63 |       |       | C |
| ANISOU | 429 | CB  | SER | A | 76 | 18483 | 34386  | 27922  | -4467      | -4454 | 8877  | C |
| ATOM   | 430 | OG  | SER | A | 76 | 0.430 | -0.914 | 41.754 | 1.00209.66 |       |       | O |
| ANISOU | 430 | OG  | SER | A | 76 | 18578 | 33664  | 27421  | -3997      | -4622 | 8064  | O |
| ATOM   | 431 | N   | GLY | A | 77 | 3.603 | -1.861 | 42.131 | 1.00218.88 |       |       | N |
| ANISOU | 431 | N   | GLY | A | 77 | 19491 | 35808  | 27866  | -3698      | -4605 | 9612  | N |
| ATOM   | 432 | CA  | GLY | A | 77 | 4.572 | -2.524 | 41.278 | 1.00214.94 |       |       | C |
| ANISOU | 432 | CA  | GLY | A | 77 | 19097 | 34983  | 27589  | -3028      | -4776 | 9811  | C |
| ATOM   | 433 | C   | GLY | A | 77 | 4.065 | -2.726 | 39.865 | 1.00212.66 |       |       | C |
| ANISOU | 433 | C   | GLY | A | 77 | 19252 | 33771  | 27779  | -2272      | -5037 | 9038  | C |
| ATOM   | 434 | O   | GLY | A | 77 | 4.393 | -3.718 | 39.214 | 1.00209.12 |       |       | O |
| ANISOU | 434 | O   | GLY | A | 77 | 18881 | 32742  | 27833  | -1652      | -5277 | 9144  | O |
| ATOM   | 435 | N   | GLU | A | 78 | 3.260 | -1.781 | 39.388 | 1.00217.83 |       |       | N |
| ANISOU | 435 | N   | GLU | A | 78 | 20222 | 34280  | 28261  | -2289      | -5020 | 8238  | N |
| ATOM   | 436 | CA  | GLU | A | 78 | 2.725 | -1.844 | 38.034 | 1.00224.70 |       |       | C |
| ANISOU | 436 | CA  | GLU | A | 78 | 21578 | 34322  | 29476  | -1557      | -5318 | 7438  | C |
| ATOM   | 437 | C   | GLU | A | 78 | 3.718 | -1.224 | 37.054 | 1.00229.90 |       |       | C |
| ANISOU | 437 | C   | GLU | A | 78 | 22637 | 35169  | 29546  | -944       | -5175 | 7259  | C |
| ATOM   | 438 | O   | GLU | A | 78 | 4.358 | -0.219 | 37.362 | 1.00230.86 |       |       | O |
| ANISOU | 438 | O   | GLU | A | 78 | 22696 | 36012  | 29008  | -1261      | -4833 | 7429  | O |
| ATOM   | 439 | CB  | GLU | A | 78 | 1.366 | -1.142 | 37.961 | 1.00222.07 |       |       | C |
| ANISOU | 439 | CB  | GLU | A | 78 | 21369 | 33716  | 29293  | -1833      | -5384 | 6710  | C |
| ATOM   | 440 | CG  | GLU | A | 78 | 0.543 | -1.491 | 36.730 | 1.00223.70 |       |       | C |
| ANISOU | 440 | CG  | GLU | A | 78 | 21991 | 32920  | 30086  | -1145      | -5863 | 5919  | C |
| ATOM   | 441 | CD  | GLU | A | 78 | 0.826 | -0.575 | 35.558 | 1.00220.30 |       |       | C |
| ANISOU | 441 | CD  | GLU | A | 78 | 22145 | 32484  | 29076  | -545       | -5837 | 5289  | C |
| ATOM   | 442 | OE1 | GLU | A | 78 | 1.205 | 0.590  | 35.796 | 1.00227.10 |       |       | O |
| ANISOU | 442 | OE1 | GLU | A | 78 | 23018 | 34036  | 29232  | -870       | -5434 | 5306  | O |
| ATOM   | 443 | OE2 | GLU | A | 78 | 0.669 | -1.019 | 34.401 | 1.00211.60 |       |       | O |
| ANISOU | 443 | OE2 | GLU | A | 78 | 21498 | 30674  | 28227  | 277        | -6234 | 4782  | O |
| ATOM   | 444 | N   | GLU | A | 79 | 3.840 | -1.831 | 35.877 | 1.00233.59 |       |       | N |
| ANISOU | 444 | N   | GLU | A | 79 | 23512 | 34963  | 30279  | -36        | -5440 | 6928  | N |
| ATOM   | 445 | CA  | GLU | A | 79 | 4.871 | -1.460 | 34.908 | 1.00236.95 |       |       | C |
| ANISOU | 445 | CA  | GLU | A | 79 | 24304 | 35536  | 30189  | 705        | -5236 | 6911  | C |
| ATOM   | 446 | C   | GLU | A | 79 | 4.811 | 0.002  | 34.459 | 1.00240.55 |       |       | C |
| ANISOU | 446 | C   | GLU | A | 79 | 25038 | 36347  | 30013  | 679        | -4962 | 6468  | C |
| ATOM   | 447 | O   | GLU | A | 79 | 5.846 | 0.649  | 34.295 | 1.00240.99 |       |       | O |
| ANISOU | 447 | O   | GLU | A | 79 | 25072 | 36929  | 29563  | 806        | -4585 | 6818  | O |
| ATOM   | 448 | CB  | GLU | A | 79 | 4.817 | -2.391 | 33.692 | 1.00237.31 |       |       | C |
| ANISOU | 448 | CB  | GLU | A | 79 | 24843 | 34733  | 30590  | 1775       | -5604 | 6504  | C |
| ATOM   | 449 | CG  | GLU | A | 79 | 5.958 | -2.196 | 32.705 | 1.00237.30 |       |       | C |
| ANISOU | 449 | CG  | GLU | A | 79 | 25214 | 34887  | 30060  | 2677       | -5312 | 6620  | C |
| ATOM   | 450 | CD  | GLU | A | 79 | 5.969 | -3.248 | 31.613 | 1.00243.34 |       |       | C |
| ANISOU | 450 | CD  | GLU | A | 79 | 26493 | 34840  | 31124  | 3790       | -5678 | 6247  | C |
| ATOM   | 451 | OE1 | GLU | A | 79 | 5.072 | -4.117 | 31.613 | 1.00247.18 |       |       | O |
| ANISOU | 451 | OE1 | GLU | A | 79 | 27026 | 34583  | 32309  | 3816       | -6243 | 5856  | O |
| ATOM   | 452 | OE2 | GLU | A | 79 | 6.875 | -3.206 | 30.755 | 1.00245.60 |       |       | O |
| ANISOU | 452 | OE2 | GLU | A | 79 | 27129 | 35211  | 30976  | 4664       | -5404 | 6351  | O |
| ATOM   | 453 | N   | LEU | A | 80 | 3.602 | 0.520  | 34.266 | 1.00241.02 |       |       | N |



|        |     |     |     |   |    |       |       |        |            |       |      |   |
|--------|-----|-----|-----|---|----|-------|-------|--------|------------|-------|------|---|
| ANISOU | 453 | N   | LEU | A | 80 | 25305 | 36084 | 30187  | 512        | -5153 | 5744 | N |
| ATOM   | 454 | CA  | LEU | A | 80 | 3.430 | 1.894 | 33.801 | 1.00231.53 |       |      | C |
| ANISOU | 454 | CA  | LEU | A | 80 | 24373 | 35128 | 28471  | 509        | -4928 | 5287 | C |
| ATOM   | 455 | C   | LEU | A | 80 | 3.483 | 2.902 | 34.947 | 1.00216.53 |       |      | C |
| ANISOU | 455 | C   | LEU | A | 80 | 22049 | 33979 | 26244  | -486       | -4593 | 5540 | C |
| ATOM   | 456 | O   | LEU | A | 80 | 4.151 | 3.931 | 34.845 | 1.00220.33 |       |      | O |
| ANISOU | 456 | O   | LEU | A | 80 | 22536 | 34948 | 26233  | -556       | -4265 | 5647 | O |
| ATOM   | 457 | CB  | LEU | A | 80 | 2.114 | 2.043 | 33.032 | 1.00230.66 |       |      | C |
| ANISOU | 457 | CB  | LEU | A | 80 | 24685 | 34314 | 28642  | 817        | -5315 | 4379 | C |
| ATOM   | 458 | CG  | LEU | A | 80 | 1.811 | 3.434 | 32.469 | 1.00223.91 |       |      | C |
| ANISOU | 458 | CG  | LEU | A | 80 | 24134 | 33619 | 27324  | 874        | -5124 | 3870 | C |
| ATOM   | 459 | CD1 | LEU | A | 80 | 2.875 | 3.851 | 31.464 | 1.00221.23 |       |      | C |
| ANISOU | 459 | CD1 | LEU | A | 80 | 24163 | 33475 | 26420  | 1678       | -4832 | 4019 | C |
| ATOM   | 460 | CD2 | LEU | A | 80 | 0.429 | 3.472 | 31.838 | 1.00224.50 |       |      | C |
| ANISOU | 460 | CD2 | LEU | A | 80 | 24548 | 32971 | 27779  | 1106       | -5589 | 3016 | C |
| ATOM   | 461 | N   | ALA | A | 81 | 2.778 | 2.596 | 36.033 | 1.00194.87 |       |      | N |
| ANISOU | 461 | N   | ALA | A | 81 | 18940 | 31305 | 23798  | -1217      | -4680 | 5644 | N |
| ATOM   | 462 | CA  | ALA | A | 81 | 2.690 | 3.490 | 37.185 | 1.00172.09 |       |      | C |
| ANISOU | 462 | CA  | ALA | A | 81 | 15722 | 29106 | 20558  | -2118      | -4405 | 5792 | C |
| ATOM   | 463 | C   | ALA | A | 81 | 4.063 | 3.813 | 37.759 | 1.00164.96 |       |      | C |
| ANISOU | 463 | C   | ALA | A | 81 | 14542 | 28965 | 19170  | -2382      | -4144 | 6482 | C |
| ATOM   | 464 | O   | ALA | A | 81 | 4.299 | 4.917 | 38.246 | 1.00163.38 |       |      | O |
| ANISOU | 464 | O   | ALA | A | 81 | 14237 | 29305 | 18533  | -2876      | -3937 | 6448 | O |
| ATOM   | 465 | CB  | ALA | A | 81 | 1.795 | 2.888 | 38.255 | 1.00174.42 |       |      | C |
| ANISOU | 465 | CB  | ALA | A | 81 | 15673 | 29359 | 21240  | -2717      | -4490 | 5937 | C |
| ATOM   | 466 | N   | VAL | A | 82 | 4.965 | 2.840 | 37.698 | 1.00170.88 |       |      | N |
| ANISOU | 466 | N   | VAL | A | 82 | 15153 | 29710 | 20062  | -2046      | -4196 | 7098 | N |
| ATOM   | 467 | CA  | VAL | A | 82 | 6.337 | 3.041 | 38.142 | 1.00187.99 |       |      | C |
| ANISOU | 467 | CA  | VAL | A | 82 | 17014 | 32524 | 21891  | -2215      | -4004 | 7814 | C |
| ATOM   | 468 | C   | VAL | A | 82 | 7.074 | 3.973 | 37.186 | 1.00186.59 |       |      | C |
| ANISOU | 468 | C   | VAL | A | 82 | 17046 | 32426 | 21426  | -1755      | -3776 | 7702 | C |
| ATOM   | 469 | O   | VAL | A | 82 | 7.755 | 4.907 | 37.613 | 1.00183.33 |       |      | O |
| ANISOU | 469 | O   | VAL | A | 82 | 16397 | 32566 | 20693  | -2173      | -3603 | 7941 | O |
| ATOM   | 470 | CB  | VAL | A | 82 | 7.095 | 1.704 | 38.253 | 1.00206.85 |       |      | C |
| ANISOU | 470 | CB  | VAL | A | 82 | 19179 | 34821 | 24594  | -1902      | -4107 | 8531 | C |
| ATOM   | 471 | CG1 | VAL | A | 82 | 8.590 | 1.943 | 38.405 | 1.00216.35 |       |      | C |
| ANISOU | 471 | CG1 | VAL | A | 82 | 20089 | 36580 | 25536  | -1888      | -3916 | 9250 | C |
| ATOM   | 472 | CG2 | VAL | A | 82 | 6.555 | 0.887 | 39.420 | 1.00210.35 |       |      | C |
| ANISOU | 472 | CG2 | VAL | A | 82 | 19287 | 35346 | 25290  | -2480      | -4265 | 8868 | C |
| ATOM   | 473 | N   | ALA | A | 83 | 6.924 | 3.718 | 35.890 | 1.00190.79 |       |      | N |
| ANISOU | 473 | N   | ALA | A | 83 | 18020 | 32382 | 22090  | -868       | -3794 | 7346 | N |
| ATOM   | 474 | CA  | ALA | A | 83 | 7.546 | 4.550 | 34.866 | 1.00192.92 |       |      | C |
| ANISOU | 474 | CA  | ALA | A | 83 | 18532 | 32684 | 22085  | -294       | -3511 | 7281 | C |
| ATOM   | 475 | C   | ALA | A | 83 | 7.035 | 5.985 | 34.947 | 1.00192.26 |       |      | C |
| ANISOU | 475 | C   | ALA | A | 83 | 18505 | 32800 | 21744  | -755       | -3389 | 6799 | C |
| ATOM   | 476 | O   | ALA | A | 83 | 7.769 | 6.932 | 34.665 | 1.00197.80 |       |      | O |
| ANISOU | 476 | O   | ALA | A | 83 | 19123 | 33797 | 22236  | -709       | -3105 | 7003 | O |
| ATOM   | 477 | CB  | ALA | A | 83 | 7.290 | 3.971 | 33.484 | 1.00191.74 |       |      | C |
| ANISOU | 477 | CB  | ALA | A | 83 | 18954 | 31870 | 22029  | 803        | -3595 | 6891 | C |
| ATOM   | 478 | N   | VAL | A | 84 | 5.772 | 6.134 | 35.336 | 1.00184.43 |       |      | N |
| ANISOU | 478 | N   | VAL | A | 84 | 17617 | 31612 | 20848  | -1190      | -3593 | 6194 | N |
| ATOM   | 479 | CA  | VAL | A | 84 | 5.177 | 7.450 | 35.534 | 1.00174.76 |       |      | C |
| ANISOU | 479 | CA  | VAL | A | 84 | 16426 | 30549 | 19427  | -1678      | -3491 | 5700 | C |
| ATOM   | 480 | C   | VAL | A | 84 | 5.875 | 8.188 | 36.674 | 1.00173.62 |       |      | C |
| ANISOU | 480 | C   | VAL | A | 84 | 15823 | 31111 | 19033  | -2504      | -3354 | 6104 | C |
| ATOM   | 481 | O   | VAL | A | 84 | 6.281 | 9.339 | 36.524 | 1.00172.87 |       |      | O |
| ANISOU | 481 | O   | VAL | A | 84 | 15677 | 31239 | 18765  | -2640      | -3174 | 6054 | O |
| ATOM   | 482 | CB  | VAL | A | 84 | 3.670 | 7.347 | 35.837 | 1.00167.91 |       |      | C |
| ANISOU | 482 | CB  | VAL | A | 84 | 15686 | 29327 | 18786  | -1992      | -3716 | 5046 | C |
| ATOM   | 483 | CG1 | VAL | A | 84 | 3.134 | 8.676 | 36.344 | 1.00164.33 |       |      | C |
| ANISOU | 483 | CG1 | VAL | A | 84 | 15168 | 29145 | 18124  | -2631      | -3573 | 4627 | C |
| ATOM   | 484 | CG2 | VAL | A | 84 | 2.909 | 6.896 | 34.600 | 1.00166.59 |       |      | C |
| ANISOU | 484 | CG2 | VAL | A | 84 | 16008 | 28403 | 18887  | -1182      | -3953 | 4496 | C |
| ATOM   | 485 | N   | ALA | A | 85 | 6.019 | 7.510 | 37.808 | 1.00173.85 |       |      | N |
| ANISOU | 485 | N   | ALA | A | 85 | 15519 | 31469 | 19066  | -3031      | -3478 | 6516 | N |
| ATOM   | 486 | CA  | ALA | A | 85 | 6.686 | 8.089 | 38.968 | 1.00182.40 |       |      | C |
| ANISOU | 486 | CA  | ALA | A | 85 | 16208 | 33239 | 19859  | -3788      | -3460 | 6886 | C |
| ATOM   | 487 | C   | ALA | A | 85 | 8.177 | 8.279 | 38.710 | 1.00204.45 |       |      | C |
| ANISOU | 487 | C   | ALA | A | 85 | 18735 | 36311 | 22636  | -3588      | -3361 | 7548 | C |
| ATOM   | 488 | O   | ALA | A | 85 | 8.840 | 9.066 | 39.386 | 1.00216.04 |       |      | O |

|        |     |     |     |   |    |        |        |        |            |       |      |   |
|--------|-----|-----|-----|---|----|--------|--------|--------|------------|-------|------|---|
| ANISOU | 488 | O   | ALA | A | 85 | 19896  | 38257  | 23931  | -4125      | -3389 | 7767 | O |
| ATOM   | 489 | CB  | ALA | A | 85 | 6.466  | 7.217  | 40.192 | 1.00177.82 |       |      | C |
| ANISOU | 489 | CB  | ALA | A | 85 | 15381  | 32947  | 19238  | -4288      | -3617 | 7225 | C |
| ATOM   | 490 | N   | GLU | A | 86 | 8.696  | 7.553  | 37.727 | 1.00204.80 |       |      | N |
| ANISOU | 490 | N   | GLU | A | 86 | 21420  | 32693  | 23700  | -8108      | -3865 | 3891 | N |
| ATOM   | 491 | CA  | GLU | A | 86 | 10.105 | 7.636  | 37.371 | 1.00204.74 |       |      | C |
| ANISOU | 491 | CA  | GLU | A | 86 | 20777  | 33017  | 23999  | -7958      | -3917 | 3637 | C |
| ATOM   | 492 | C   | GLU | A | 86 | 10.403 | 8.915  | 36.595 | 1.00199.48 |       |      | C |
| ANISOU | 492 | C   | GLU | A | 86 | 19780  | 32595  | 23420  | -8456      | -3623 | 3434 | C |
| ATOM   | 493 | O   | GLU | A | 86 | 11.466 | 9.514  | 36.751 | 1.00208.64 |       |      | O |
| ANISOU | 493 | O   | GLU | A | 86 | 20410  | 34096  | 24769  | -8538      | -3698 | 3183 | O |
| ATOM   | 494 | CB  | GLU | A | 86 | 10.514 | 6.413  | 36.547 | 1.00204.88 |       |      | C |
| ANISOU | 494 | CB  | GLU | A | 86 | 20697  | 32910  | 24238  | -7595      | -3742 | 3545 | C |
| ATOM   | 495 | CG  | GLU | A | 86 | 11.980 | 6.388  | 36.151 | 1.00211.19 |       |      | C |
| ANISOU | 495 | CG  | GLU | A | 86 | 20758  | 34052  | 25432  | -7414      | -3750 | 3181 | C |
| ATOM   | 496 | CD  | GLU | A | 86 | 12.341 | 5.157  | 35.345 | 1.00213.89 |       |      | C |
| ANISOU | 496 | CD  | GLU | A | 86 | 21013  | 34238  | 26017  | -7041      | -3548 | 3057 | C |
| ATOM   | 497 | OE1 | GLU | A | 86 | 11.439 | 4.333  | 35.083 | 1.00208.94 |       |      | O |
| ANISOU | 497 | OE1 | GLU | A | 86 | 20940  | 33227  | 25221  | -6949      | -3398 | 3279 | O |
| ATOM   | 498 | OE2 | GLU | A | 86 | 13.525 | 5.014  | 34.973 | 1.00219.39 |       |      | O |
| ANISOU | 498 | OE2 | GLU | A | 86 | 21059  | 35197  | 27100  | -6859      | -3512 | 2685 | O |
| ATOM   | 499 | N   | ARG | A | 87 | 9.457  | 9.329  | 35.760 | 1.00181.95 |       |      | N |
| ANISOU | 499 | N   | ARG | A | 87 | 17907  | 30179  | 21046  | -8792      | -3297 | 3516 | N |
| ATOM   | 500 | CA  | ARG | A | 87 | 9.643  | 10.503 | 34.916 | 1.00170.07 |       |      | C |
| ANISOU | 500 | CA  | ARG | A | 87 | 16304  | 28783  | 19533  | -9259      | -2993 | 3372 | C |
| ATOM   | 501 | C   | ARG | A | 87 | 9.431  | 11.812 | 35.672 | 1.00162.63 |       |      | C |
| ANISOU | 501 | C   | ARG | A | 87 | 15416  | 27924  | 18453  | -9583      | -3144 | 3407 | C |
| ATOM   | 502 | O   | ARG | A | 87 | 10.267 | 12.714 | 35.618 | 1.00162.89 |       |      | O |
| ANISOU | 502 | O   | ARG | A | 87 | 15128  | 28188  | 18576  | -9873      | -3043 | 3202 | O |
| ATOM   | 503 | CB  | ARG | A | 87 | 8.709  | 10.441 | 33.706 | 1.00167.05 |       |      | C |
| ANISOU | 503 | CB  | ARG | A | 87 | 16358  | 28125  | 18989  | -9423      | -2680 | 3447 | C |
| ATOM   | 504 | CG  | ARG | A | 87 | 9.084  | 9.374  | 32.691 | 1.00181.22 |       |      | C |
| ANISOU | 504 | CG  | ARG | A | 87 | 18073  | 29867  | 20916  | -9240      | -2406 | 3332 | C |
| ATOM   | 505 | CD  | ARG | A | 87 | 10.495 | 9.596  | 32.168 | 1.00206.82 |       |      | C |
| ANISOU | 505 | CD  | ARG | A | 87 | 20795  | 33384  | 24403  | -9365      | -2144 | 3012 | C |
| ATOM   | 506 | NE  | ARG | A | 87 | 10.847 | 8.658  | 31.107 | 1.00223.88 |       |      | N |
| ANISOU | 506 | NE  | ARG | A | 87 | 22887  | 35481  | 26694  | -9247      | -1805 | 2850 | N |
| ATOM   | 507 | CZ  | ARG | A | 87 | 10.683 | 8.901  | 29.810 | 1.00230.32 |       |      | C |
| ANISOU | 507 | CZ  | ARG | A | 87 | 23984  | 36180  | 27348  | -9577      | -1377 | 2770 | C |
| ATOM   | 508 | NH1 | ARG | A | 87 | 10.169 | 10.056 | 29.410 | 1.00229.86 |       |      | N |
| ANISOU | 508 | NH1 | ARG | A | 87 | 24334  | 36023  | 26981  | -9999      | -1281 | 2863 | N |
| ATOM   | 509 | NH2 | ARG | A | 87 | 11.032 | 7.989  | 28.913 | 1.00234.16 |       |      | N |
| ANISOU | 509 | NH2 | ARG | A | 87 | 24402  | 36614  | 27953  | -9471      | -1055 | 2594 | N |
| ATOM   | 510 | N   | VAL | A | 88 | 8.313  | 11.909 | 36.382 | 1.00159.98 |       |      | N |
| ANISOU | 510 | N   | VAL | A | 88 | 15480  | 27390  | 17917  | -9569      | -3337 | 3617 | N |
| ATOM   | 511 | CA  | VAL | A | 88 | 7.934  | 13.152 | 37.045 | 1.00165.86 |       |      | C |
| ANISOU | 511 | CA  | VAL | A | 88 | 16340  | 28151  | 18529  | -9880      | -3441 | 3639 | C |
| ATOM   | 512 | C   | VAL | A | 88 | 8.555  | 13.303 | 38.430 | 1.00170.55 |       |      | C |
| ANISOU | 512 | C   | VAL | A | 88 | 16693  | 28979  | 19130  | -9806      | -3785 | 3605 | C |
| ATOM   | 513 | O   | VAL | A | 88 | 8.161  | 14.180 | 39.199 | 1.00165.49 |       |      | O |
| ANISOU | 513 | O   | VAL | A | 88 | 16186  | 28334  | 18358  | -10032     | -3899 | 3628 | O |
| ATOM   | 514 | CB  | VAL | A | 88 | 6.405  | 13.272 | 37.171 | 1.00167.97 |       |      | C |
| ANISOU | 514 | CB  | VAL | A | 88 | 17095  | 28108  | 18619  | -9927      | -3461 | 3784 | C |
| ATOM   | 515 | CG1 | VAL | A | 88 | 5.757  | 13.210 | 35.797 | 1.00179.99 |       |      | C |
| ANISOU | 515 | CG1 | VAL | A | 88 | 18863  | 29419  | 20106  | -9975      | -3221 | 3780 | C |
| ATOM   | 516 | CG2 | VAL | A | 88 | 5.859  | 12.175 | 38.075 | 1.00157.34 |       |      | C |
| ANISOU | 516 | CG2 | VAL | A | 88 | 15930  | 26641  | 17209  | -9644      | -3635 | 3900 | C |
| ATOM   | 517 | N   | GLN | A | 89 | 9.529  | 12.455 | 38.742 | 1.00183.23 |       |      | N |
| ANISOU | 517 | N   | GLN | A | 89 | 17953  | 30783  | 20884  | -9465      | -3980 | 3525 | N |
| ATOM   | 518 | CA  | GLN | A | 89 | 10.187 | 12.502 | 40.043 | 1.00202.28 |       |      | C |
| ANISOU | 518 | CA  | GLN | A | 89 | 20156  | 33431  | 23270  | -9313      | -4414 | 3473 | C |
| ATOM   | 519 | C   | GLN | A | 89 | 10.959 | 13.806 | 40.231 | 1.00201.10 |       |      | C |
| ANISOU | 519 | C   | GLN | A | 89 | 19595  | 33605  | 23209  | -9707      | -4400 | 3210 | C |
| ATOM   | 520 | O   | GLN | A | 89 | 11.228 | 14.222 | 41.358 | 1.00199.51 |       |      | O |
| ANISOU | 520 | O   | GLN | A | 89 | 19316  | 33582  | 22908  | -9735      | -4738 | 3161 | O |
| ATOM   | 521 | CB  | GLN | A | 89 | 11.121 | 11.304 | 40.220 | 1.00225.30 |       |      | C |
| ANISOU | 521 | CB  | GLN | A | 89 | 22774  | 36473  | 26359  | -8770      | -4696 | 3399 | C |
| ATOM   | 522 | CG  | GLN | A | 89 | 12.302 | 11.291 | 39.266 | 1.00244.30 |       |      | C |
| ANISOU | 522 | CG  | GLN | A | 89 | 24515  | 39161  | 29148  | -8761      | -4492 | 3046 | C |
| ATOM   | 523 | CD  | GLN | A | 89 | 13.174 | 10.066 | 39.441 | 1.00261.81 |       |      | C |

|        |     |     |     |   |    |        |        |        |            |       |      |   |
|--------|-----|-----|-----|---|----|--------|--------|--------|------------|-------|------|---|
| ANISOU | 523 | CD  | GLN | A | 89 | 26408  | 41473  | 31595  | -8137      | -4811 | 2927 | C |
| ATOM   | 524 | OE1 | GLN | A | 89 | 12.869 | 9.182  | 40.242 | 1.00269.22 |       |      | O |
| ANISOU | 524 | OE1 | GLN | A | 89 | 27736  | 42205  | 32349  | -7690      | -5195 | 3170 | O |
| ATOM   | 525 | NE2 | GLN | A | 89 | 14.269 | 10.006 | 38.691 | 1.00268.17 |       |      | N |
| ANISOU | 525 | NE2 | GLN | A | 89 | 26533  | 42557  | 32801  | -8105      | -4632 | 2524 | N |
| ATOM   | 526 | N   | GLU | A | 90 | 11.309 | 14.447 | 39.120 | 1.00194.31 |       |      | N |
| ANISOU | 526 | N   | GLU | A | 90 | 18534  | 32794  | 22500  | -10048     | -3978 | 3025 | N |
| ATOM   | 527 | CA  | GLU | A | 90 | 12.036 | 15.709 | 39.157 | 1.00185.12 |       |      | C |
| ANISOU | 527 | CA  | GLU | A | 90 | 17043  | 31876  | 21419  | -10519     | -3832 | 2735 | C |
| ATOM   | 528 | C   | GLU | A | 90 | 11.280 | 16.798 | 38.404 | 1.00167.63 |       |      | C |
| ANISOU | 528 | C   | GLU | A | 90 | 15380  | 29281  | 19033  | -10863     | -3381 | 2806 | C |
| ATOM   | 529 | O   | GLU | A | 90 | 11.811 | 17.408 | 37.477 | 1.00168.54 |       |      | O |
| ANISOU | 529 | O   | GLU | A | 90 | 15456  | 29363  | 19219  | -11150     | -2950 | 2593 | O |
| ATOM   | 530 | CB  | GLU | A | 90 | 13.433 | 15.538 | 38.563 | 1.00197.17 |       |      | C |
| ANISOU | 530 | CB  | GLU | A | 90 | 17871  | 33747  | 23299  | -10545     | -3655 | 2310 | C |
| ATOM   | 531 | CG  | GLU | A | 90 | 14.288 | 14.507 | 39.276 | 1.00210.45 |       |      | C |
| ANISOU | 531 | CG  | GLU | A | 90 | 19029  | 35730  | 25202  | -9985      | -4142 | 2149 | C |
| ATOM   | 532 | CD  | GLU | A | 90 | 15.656 | 14.356 | 38.645 | 1.00226.16 |       |      | C |
| ANISOU | 532 | CD  | GLU | A | 90 | 20216  | 38084  | 27632  | -10003     | -3942 | 1616 | C |
| ATOM   | 533 | OE1 | GLU | A | 90 | 15.886 | 14.964 | 37.579 | 1.00229.74 |       |      | O |
| ANISOU | 533 | OE1 | GLU | A | 90 | 20608  | 38510  | 28171  | -10504     | -3329 | 1406 | O |
| ATOM   | 534 | OE2 | GLU | A | 90 | 16.500 | 13.633 | 39.215 | 1.00234.57 |       |      | O |
| ANISOU | 534 | OE2 | GLU | A | 90 | 20733  | 39442  | 28950  | -9514      | -4394 | 1376 | O |
| ATOM   | 535 | N   | LYS | A | 91 | 10.038 | 17.035 | 38.810 | 1.00162.45 |       |      | N |
| ANISOU | 535 | N   | LYS | A | 91 | 15268  | 28314  | 18141  | -10819     | -3487 | 3076 | N |
| ATOM   | 536 | CA  | LYS | A | 91 | 9.205  | 18.047 | 38.174 | 1.00160.03 |       |      | C |
| ANISOU | 536 | CA  | LYS | A | 91 | 15502  | 27630  | 17672  | -11036     | -3200 | 3146 | C |
| ATOM   | 537 | C   | LYS | A | 91 | 8.712  | 19.072 | 39.190 | 1.00160.09 |       |      | C |
| ANISOU | 537 | C   | LYS | A | 91 | 15781  | 27496  | 17551  | -11091     | -3302 | 3136 | C |
| ATOM   | 538 | O   | LYS | A | 91 | 8.738  | 18.822 | 40.394 | 1.00159.43 |       |      | O |
| ANISOU | 538 | O   | LYS | A | 91 | 15579  | 27555  | 17440  | -10951     | -3593 | 3143 | O |
| ATOM   | 539 | CB  | LYS | A | 91 | 8.022  | 17.392 | 37.461 | 1.00156.37 |       |      | C |
| ANISOU | 539 | CB  | LYS | A | 91 | 15395  | 26907  | 17112  | -10926     | -3207 | 3395 | C |
| ATOM   | 540 | CG  | LYS | A | 91 | 8.359  | 16.825 | 36.090 | 1.00157.28 |       |      | C |
| ANISOU | 540 | CG  | LYS | A | 91 | 15436  | 27042  | 17281  | -11019     | -2953 | 3387 | C |
| ATOM   | 541 | CD  | LYS | A | 91 | 8.637  | 17.943 | 35.097 | 1.00161.98 |       |      | C |
| ANISOU | 541 | CD  | LYS | A | 91 | 16307  | 27472  | 17765  | -11407     | -2579 | 3284 | C |
| ATOM   | 542 | CE  | LYS | A | 91 | 8.877  | 17.403 | 33.697 | 1.00165.43 |       |      | C |
| ANISOU | 542 | CE  | LYS | A | 91 | 16853  | 27834  | 18170  | -11458     | -2257 | 3259 | C |
| ATOM   | 543 | NZ  | LYS | A | 91 | 9.028  | 18.502 | 32.700 | 1.00162.64 |       |      | N |
| ANISOU | 543 | NZ  | LYS | A | 91 | 16966  | 27237  | 17593  | -11908     | -1881 | 3208 | N |
| ATOM   | 544 | N   | ASP | A | 92 | 8.262  | 20.223 | 38.699 | 1.00158.57 |       |      | N |
| ANISOU | 544 | N   | ASP | A | 92 | 15984  | 27012  | 17252  | -11329     | -3077 | 3124 | N |
| ATOM   | 545 | CA  | ASP | A | 92 | 7.841  | 21.321 | 39.566 | 1.00172.90 |       |      | C |
| ANISOU | 545 | CA  | ASP | A | 92 | 18042  | 28675  | 18978  | -11427     | -3120 | 3072 | C |
| ATOM   | 546 | C   | ASP | A | 92 | 6.336  | 21.327 | 39.814 | 1.00154.71 |       |      | C |
| ANISOU | 546 | C   | ASP | A | 92 | 16125  | 26074  | 16584  | -11279     | -3273 | 3240 | C |
| ATOM   | 547 | O   | ASP | A | 92 | 5.595  | 20.571 | 39.193 | 1.00152.54 |       |      | O |
| ANISOU | 547 | O   | ASP | A | 92 | 15954  | 25692  | 16310  | -11131     | -3331 | 3382 | O |
| ATOM   | 548 | CB  | ASP | A | 92 | 8.278  | 22.664 | 38.978 | 1.00170.46 |       |      | C |
| ANISOU | 548 | CB  | ASP | A | 92 | 17943  | 28204  | 18621  | -11823     | -2798 | 2923 | C |
| ATOM   | 549 | CG  | ASP | A | 92 | 7.713  | 22.904 | 37.593 | 1.00171.83 |       |      | C |
| ANISOU | 549 | CG  | ASP | A | 92 | 18555  | 28062  | 18669  | -12005     | -2625 | 3078 | C |
| ATOM   | 550 | OD1 | ASP | A | 92 | 7.641  | 21.936 | 36.808 | 1.00177.90 |       |      | O |
| ANISOU | 550 | OD1 | ASP | A | 92 | 19254  | 28887  | 19455  | -11891     | -2625 | 3189 | O |
| ATOM   | 551 | OD2 | ASP | A | 92 | 7.339  | 24.057 | 37.291 | 1.00170.62 |       |      | O |
| ANISOU | 551 | OD2 | ASP | A | 92 | 18855  | 27591  | 18383  | -12292     | -2511 | 3095 | O |
| ATOM   | 552 | N   | SER | A | 93 | 5.893  | 22.193 | 40.722 | 1.00154.61 |       |      | N |
| ANISOU | 552 | N   | SER | A | 93 | 16283  | 25938  | 16523  | -11341     | -3317 | 3164 | N |
| ATOM   | 553 | CA  | SER | A | 93 | 4.485  | 22.259 | 41.105 | 1.00167.45 |       |      | C |
| ANISOU | 553 | CA  | SER | A | 93 | 18183  | 27309  | 18133  | -11221     | -3429 | 3209 | C |
| ATOM   | 554 | C   | SER | A | 93 | 3.587  | 22.757 | 39.980 | 1.00167.47 |       |      | C |
| ANISOU | 554 | C   | SER | A | 93 | 18494  | 26989  | 18146  | -11291     | -3413 | 3267 | C |
| ATOM   | 555 | O   | SER | A | 93 | 2.451  | 22.308 | 39.845 | 1.00161.64 |       |      | O |
| ANISOU | 555 | O   | SER | A | 93 | 17840  | 26109  | 17465  | -11122     | -3541 | 3284 | O |
| ATOM   | 556 | CB  | SER | A | 93 | 4.297  | 23.145 | 42.337 | 1.00164.22 |       |      | C |
| ANISOU | 556 | CB  | SER | A | 93 | 17860  | 26850  | 17687  | -11323     | -3439 | 3062 | C |
| ATOM   | 557 | OG  | SER | A | 93 | 2.919  | 23.349 | 42.604 | 1.00151.77 |       |      | O |
| ANISOU | 557 | OG  | SER | A | 93 | 16506  | 25005  | 16154  | -11252     | -3484 | 3016 | O |
| ATOM   | 558 | N   | GLY | A | 94 | 4.094  | 23.691 | 39.184 | 1.00178.25 |       |      | N |

|        |     |     |     |   |    |        |        |        |            |       |      |   |
|--------|-----|-----|-----|---|----|--------|--------|--------|------------|-------|------|---|
| ANISOU | 558 | N   | GLY | A | 94 | 20046  | 28234  | 19445  | -11592     | -3270 | 3272 | N |
| ATOM   | 559 | CA  | GLY | A | 94 | 3.333  | 24.232 | 38.072 | 1.00183.16 |       |      | C |
| ANISOU | 559 | CA  | GLY | A | 94 | 21062  | 28526  | 20005  | -11761     | -3342 | 3374 | C |
| ATOM   | 560 | C   | GLY | A | 94 | 2.999  | 23.172 | 37.039 | 1.00175.96 |       |      | C |
| ANISOU | 560 | C   | GLY | A | 94 | 20133  | 27647  | 19076  | -11625     | -3436 | 3510 | C |
| ATOM   | 561 | O   | GLY | A | 94 | 1.908  | 23.168 | 36.465 | 1.00166.00 |       |      | O |
| ANISOU | 561 | O   | GLY | A | 94 | 19165  | 26102  | 17806  | -11341     | -3618 | 3515 | O |
| ATOM   | 562 | N   | PHE | A | 95 | 3.946  | 22.266 | 36.814 | 1.00176.66 |       |      | N |
| ANISOU | 562 | N   | PHE | A | 95 | 19936  | 28016  | 19169  | -11569     | -3273 | 3537 | N |
| ATOM   | 563 | CA  | PHE | A | 95 | 3.788  | 21.188 | 35.842 | 1.00170.46 |       |      | C |
| ANISOU | 563 | CA  | PHE | A | 95 | 19138  | 27265  | 18365  | -11399     | -3282 | 3633 | C |
| ATOM   | 564 | C   | PHE | A | 95 | 2.608  | 20.277 | 36.161 | 1.00168.20 |       |      | C |
| ANISOU | 564 | C   | PHE | A | 95 | 18770  | 26955  | 18184  | -11041     | -3518 | 3623 | C |
| ATOM   | 565 | O   | PHE | A | 95 | 1.812  | 19.953 | 35.281 | 1.00163.68 |       |      | O |
| ANISOU | 565 | O   | PHE | A | 95 | 18431  | 26187  | 17571  | -10817     | -3606 | 3627 | O |
| ATOM   | 566 | CB  | PHE | A | 95 | 5.074  | 20.363 | 35.753 | 1.00158.49 |       |      | C |
| ANISOU | 566 | CB  | PHE | A | 95 | 17213  | 26095  | 16910  | -11449     | -3078 | 3610 | C |
| ATOM   | 567 | CG  | PHE | A | 95 | 4.892  | 19.024 | 35.100 | 1.00151.48 |       |      | C |
| ANISOU | 567 | CG  | PHE | A | 95 | 16232  | 25269  | 16056  | -11175     | -3087 | 3675 | C |
| ATOM   | 568 | CD1 | PHE | A | 95 | 4.743  | 18.922 | 33.728 | 1.00152.33 |       |      | C |
| ANISOU | 568 | CD1 | PHE | A | 95 | 16691  | 25172  | 16014  | -11152     | -2945 | 3715 | C |
| ATOM   | 569 | CD2 | PHE | A | 95 | 4.880  | 17.865 | 35.859 | 1.00154.45 |       |      | C |
| ANISOU | 569 | CD2 | PHE | A | 95 | 16259  | 25858  | 16569  | -10928     | -3221 | 3688 | C |
| ATOM   | 570 | CE1 | PHE | A | 95 | 4.579  | 17.691 | 33.125 | 1.00153.74 |       |      | C |
| ANISOU | 570 | CE1 | PHE | A | 95 | 16796  | 25396  | 16221  | -10901     | -2924 | 3738 | C |
| ATOM   | 571 | CE2 | PHE | A | 95 | 4.716  | 16.632 | 35.263 | 1.00155.62 |       |      | C |
| ANISOU | 571 | CE2 | PHE | A | 95 | 16373  | 26007  | 16749  | -10667     | -3186 | 3728 | C |
| ATOM   | 572 | CZ  | PHE | A | 95 | 4.567  | 16.544 | 33.894 | 1.00154.99 |       |      | C |
| ANISOU | 572 | CZ  | PHE | A | 95 | 16567  | 25761  | 16562  | -10661     | -3030 | 3737 | C |
| ATOM   | 573 | N   | PHE | A | 96 | 2.504  | 19.860 | 37.418 | 1.00147.54 |       |      | N |
| ANISOU | 573 | N   | PHE | A | 96 | 15902  | 24484  | 15670  | -10910     | -3569 | 3559 | N |
| ATOM   | 574 | CA  | PHE | A | 96 | 1.431  | 18.967 | 37.836 | 1.00149.85 |       |      | C |
| ANISOU | 574 | CA  | PHE | A | 96 | 16146  | 24736  | 16053  | -10672     | -3678 | 3497 | C |
| ATOM   | 575 | C   | PHE | A | 96 | 0.073  | 19.660 | 37.793 | 1.00159.71 |       |      | C |
| ANISOU | 575 | C   | PHE | A | 96 | 17571  | 25727  | 17384  | -10653     | -3837 | 3335 | C |
| ATOM   | 576 | O   | PHE | A | 96 | -0.961 | 19.005 | 37.665 | 1.00144.45 |       |      | O |
| ANISOU | 576 | O   | PHE | A | 96 | 15595  | 23732  | 15557  | -10504     | -3918 | 3201 | O |
| ATOM   | 577 | CB  | PHE | A | 96 | 1.695  | 18.417 | 39.239 | 1.00145.33 |       |      | C |
| ANISOU | 577 | CB  | PHE | A | 96 | 15420  | 24314  | 15486  | -10583     | -3651 | 3473 | C |
| ATOM   | 578 | CG  | PHE | A | 96 | 2.823  | 17.424 | 39.304 | 1.00155.46 |       |      | C |
| ANISOU | 578 | CG  | PHE | A | 96 | 16459  | 25870  | 16740  | -10549     | -3644 | 3604 | C |
| ATOM   | 579 | CD1 | PHE | A | 96 | 2.570  | 16.063 | 39.275 | 1.00160.85 |       |      | C |
| ANISOU | 579 | CD1 | PHE | A | 96 | 17072  | 26605  | 17440  | -10448     | -3678 | 3677 | C |
| ATOM   | 580 | CD2 | PHE | A | 96 | 4.135  | 17.852 | 39.400 | 1.00169.81 |       |      | C |
| ANISOU | 580 | CD2 | PHE | A | 96 | 18080  | 27896  | 18544  | -10646     | -3612 | 3608 | C |
| ATOM   | 581 | CE1 | PHE | A | 96 | 3.607  | 15.146 | 39.337 | 1.00169.97 |       |      | C |
| ANISOU | 581 | CE1 | PHE | A | 96 | 18007  | 27979  | 18596  | -10353     | -3720 | 3785 | C |
| ATOM   | 582 | CE2 | PHE | A | 96 | 5.177  | 16.941 | 39.463 | 1.00176.36 |       |      | C |
| ANISOU | 582 | CE2 | PHE | A | 96 | 18580  | 29013  | 19416  | -10592     | -3674 | 3661 | C |
| ATOM   | 583 | CZ  | PHE | A | 96 | 4.911  | 15.588 | 39.431 | 1.00176.47 |       |      | C |
| ANISOU | 583 | CZ  | PHE | A | 96 | 18543  | 29060  | 19446  | -10440     | -3763 | 3773 | C |
| ATOM   | 584 | N   | LEU | A | 97 | 0.078  | 20.985 | 37.897 | 1.00156.63 |       |      | N |
| ANISOU | 584 | N   | LEU | A | 97 | 17352  | 25188  | 16973  | -10824     | -3887 | 3300 | N |
| ATOM   | 585 | CA  | LEU | A | 97 | -1.163 | 21.749 | 37.866 | 1.00161.59 |       |      | C |
| ANISOU | 585 | CA  | LEU | A | 97 | 18148  | 25529  | 17720  | -10708     | -4076 | 3098 | C |
| ATOM   | 586 | C   | LEU | A | 97 | -1.732 | 21.805 | 36.453 | 1.00172.25 |       |      | C |
| ANISOU | 586 | C   | LEU | A | 97 | 19804  | 26629  | 19013  | -10423     | -4260 | 3099 | C |
| ATOM   | 587 | O   | LEU | A | 97 | -2.924 | 22.050 | 36.263 | 1.00180.12 |       |      | O |
| ANISOU | 587 | O   | LEU | A | 97 | 20857  | 27422  | 20159  | -10162     | -4505 | 2865 | O |
| ATOM   | 588 | CB  | LEU | A | 97 | -0.948 | 23.162 | 38.412 | 1.00159.61 |       |      | C |
| ANISOU | 588 | CB  | LEU | A | 97 | 18063  | 25128  | 17455  | -10927     | -4065 | 3058 | C |
| ATOM   | 589 | CG  | LEU | A | 97 | -1.924 | 23.609 | 39.505 | 1.00169.46 |       |      | C |
| ANISOU | 589 | CG  | LEU | A | 97 | 19189  | 26290  | 18910  | -10934     | -4124 | 2772 | C |
| ATOM   | 590 | CD1 | LEU | A | 97 | -1.541 | 24.979 | 40.043 | 1.00178.36 |       |      | C |
| ANISOU | 590 | CD1 | LEU | A | 97 | 20496  | 27271  | 20002  | -11189     | -4068 | 2744 | C |
| ATOM   | 591 | CD2 | LEU | A | 97 | -3.357 | 23.617 | 38.997 | 1.00149.79 |       |      | C |
| ANISOU | 591 | CD2 | LEU | A | 97 | 16729  | 23552  | 16633  | -10569     | -4357 | 2499 | C |
| ATOM   | 592 | N   | ARG | A | 98 | -0.874 | 21.576 | 35.463 | 1.00165.75 |       |      | N |
| ANISOU | 592 | N   | ARG | A | 98 | 19175  | 25827  | 17974  | -10471     | -4151 | 3318 | N |
| ATOM   | 593 | CA  | ARG | A | 98 | -1.312 | 21.518 | 34.075 | 1.00157.76 |       |      | C |

|        |     |     |     |   |     |        |        |        |            |       |       |   |
|--------|-----|-----|-----|---|-----|--------|--------|--------|------------|-------|-------|---|
| ANISOU | 593 | CA  | ARG | A | 98  | 18544  | 24587  | 16810  | -10226     | -4320 | 3345  | C |
| ATOM   | 594 | C   | ARG | A | 98  | -2.324 | 20.396 | 33.896 | 1.00154.41 |       |       | C |
| ANISOU | 594 | C   | ARG | A | 98  | 17865  | 24253  | 16552  | -9933      | -4478 | 3152  | C |
| ATOM   | 595 | O   | ARG | A | 98  | -3.364 | 20.575 | 33.262 | 1.00154.61 |       |       | O |
| ANISOU | 595 | O   | ARG | A | 98  | 18059  | 24074  | 16611  | -9630      | -4800 | 2970  | O |
| ATOM   | 596 | CB  | ARG | A | 98  | -0.126 | 21.289 | 33.138 | 1.00151.54 |       |       | C |
| ANISOU | 596 | CB  | ARG | A | 98  | 17974  | 23850  | 15753  | -10416     | -4056 | 3572  | C |
| ATOM   | 597 | CG  | ARG | A | 98  | 0.921  | 22.387 | 33.159 | 1.00156.64 |       |       | C |
| ANISOU | 597 | CG  | ARG | A | 98  | 18892  | 24396  | 16229  | -10789     | -3812 | 3690  | C |
| ATOM   | 598 | CD  | ARG | A | 98  | 1.805  | 22.308 | 31.924 | 1.00172.44 |       |       | C |
| ANISOU | 598 | CD  | ARG | A | 98  | 21266  | 26323  | 17930  | -10976     | -3536 | 3824  | C |
| ATOM   | 599 | NE  | ARG | A | 98  | 2.821  | 23.356 | 31.895 | 1.00187.82 |       |       | N |
| ANISOU | 599 | NE  | ARG | A | 98  | 23492  | 28156  | 19715  | -11423     | -3204 | 3866  | N |
| ATOM   | 600 | CZ  | ARG | A | 98  | 4.109  | 23.153 | 32.151 | 1.00204.62 |       |       | C |
| ANISOU | 600 | CZ  | ARG | A | 98  | 25239  | 30599  | 21907  | -11796     | -2808 | 3817  | C |
| ATOM   | 601 | NH1 | ARG | A | 98  | 4.544  | 21.936 | 32.450 | 1.00208.04 |       |       | N |
| ANISOU | 601 | NH1 | ARG | A | 98  | 25045  | 31449  | 22550  | -11702     | -2752 | 3770  | N |
| ATOM   | 602 | NH2 | ARG | A | 98  | 4.965  | 24.164 | 32.102 | 1.00216.07 |       |       | N |
| ANISOU | 602 | NH2 | ARG | A | 98  | 26939  | 31932  | 23228  | -12258     | -2469 | 3775  | N |
| ATOM   | 603 | N   | PHE | A | 99  | -2.011 | 19.240 | 34.471 | 1.00135.33 |       |       | N |
| ANISOU | 603 | N   | PHE | A | 99  | 19079  | 18696  | 13644  | -8199      | -5121 | 361   | N |
| ATOM   | 604 | CA  | PHE | A | 99  | -2.863 | 18.062 | 34.368 | 1.00135.06 |       |       | C |
| ANISOU | 604 | CA  | PHE | A | 99  | 18663  | 18614  | 14039  | -7634      | -5005 | 318   | C |
| ATOM   | 605 | C   | PHE | A | 99  | -4.145 | 18.222 | 35.181 | 1.00127.67 |       |       | C |
| ANISOU | 605 | C   | PHE | A | 99  | 18110  | 17660  | 12737  | -7581      | -4991 | -90   | C |
| ATOM   | 606 | O   | PHE | A | 99  | -5.140 | 17.542 | 34.927 | 1.00121.91 |       |       | O |
| ANISOU | 606 | O   | PHE | A | 99  | 17269  | 16792  | 12261  | -7057      | -4836 | -332  | O |
| ATOM   | 607 | CB  | PHE | A | 99  | -2.103 | 16.815 | 34.824 | 1.00141.78 |       |       | C |
| ANISOU | 607 | CB  | PHE | A | 99  | 18685  | 19833  | 15352  | -7755      | -5163 | 992   | C |
| ATOM   | 608 | CG  | PHE | A | 99  | -0.986 | 16.412 | 33.902 | 1.00141.46 |       |       | C |
| ANISOU | 608 | CG  | PHE | A | 99  | 18152  | 19779  | 15816  | -7631      | -5093 | 1376  | C |
| ATOM   | 609 | CD1 | PHE | A | 99  | -1.135 | 15.339 | 33.040 | 1.00136.15 |       |       | C |
| ANISOU | 609 | CD1 | PHE | A | 99  | 17059  | 18919  | 15753  | -7021      | -4876 | 1444  | C |
| ATOM   | 610 | CD2 | PHE | A | 99  | 0.212  | 17.106 | 33.895 | 1.00146.96 |       |       | C |
| ANISOU | 610 | CD2 | PHE | A | 99  | 18815  | 20651  | 16371  | -8141      | -5224 | 1662  | C |
| ATOM   | 611 | CE1 | PHE | A | 99  | -0.112 | 14.963 | 32.190 | 1.00134.44 |       |       | C |
| ANISOU | 611 | CE1 | PHE | A | 99  | 16404  | 18672  | 16005  | -6891      | -4759 | 1782  | C |
| ATOM   | 612 | CE2 | PHE | A | 99  | 1.238  | 16.737 | 33.047 | 1.00147.22 |       |       | C |
| ANISOU | 612 | CE2 | PHE | A | 99  | 18363  | 20689  | 16886  | -8023      | -5119 | 2007  | C |
| ATOM   | 613 | CZ  | PHE | A | 99  | 1.076  | 15.663 | 32.194 | 1.00140.81 |       |       | C |
| ANISOU | 613 | CZ  | PHE | A | 99  | 17140  | 19672  | 16690  | -7381      | -4871 | 2063  | C |
| ATOM   | 614 | N   | ILE | A | 100 | -4.114 | 19.118 | 36.162 | 1.00130.55 |       |       | N |
| ANISOU | 614 | N   | ILE | A | 100 | 18930  | 18171  | 12500  | -8146      | -5139 | -168  | N |
| ATOM   | 615 | CA  | ILE | A | 100 | -5.290 | 19.399 | 36.979 | 1.00137.29 |       |       | C |
| ANISOU | 615 | CA  | ILE | A | 100 | 20184  | 18988  | 12993  | -8065      | -5028 | -563  | C |
| ATOM   | 616 | C   | ILE | A | 100 | -6.250 | 20.310 | 36.215 | 1.00135.01 |       |       | C |
| ANISOU | 616 | C   | ILE | A | 100 | 20528  | 18243  | 12527  | -7565      | -4760 | -1239 | C |
| ATOM   | 617 | O   | ILE | A | 100 | -7.460 | 20.075 | 36.186 | 1.00126.81 |       |       | O |
| ANISOU | 617 | O   | ILE | A | 100 | 19585  | 17077  | 11520  | -7144      | -4624 | -1645 | O |
| ATOM   | 618 | CB  | ILE | A | 100 | -4.907 | 20.017 | 38.348 | 1.00131.07 |       |       | C |
| ANISOU | 618 | CB  | ILE | A | 100 | 19616  | 18429  | 11756  | -8581      | -5045 | -329  | C |
| ATOM   | 619 | CG1 | ILE | A | 100 | -4.723 | 18.922 | 39.402 | 1.00140.35 |       |       | C |
| ANISOU | 619 | CG1 | ILE | A | 100 | 20257  | 20009  | 13062  | -8862      | -5236 | 160   | C |
| ATOM   | 620 | CG2 | ILE | A | 100 | -5.976 | 20.977 | 38.833 | 1.00131.59 |       |       | C |
| ANISOU | 620 | CG2 | ILE | A | 100 | 20344  | 18262  | 11393  | -8409      | -4774 | -863  | C |
| ATOM   | 621 | CD1 | ILE | A | 100 | -3.569 | 17.985 | 39.138 | 1.00133.33 |       |       | C |
| ANISOU | 621 | CD1 | ILE | A | 100 | 18644  | 19388  | 12626  | -9034      | -5500 | 798   | C |
| ATOM   | 622 | N   | ARG | A | 101 | -5.698 | 21.336 | 35.575 | 1.00132.37 |       |       | N |
| ANISOU | 622 | N   | ARG | A | 101 | 20597  | 17667  | 12029  | -7592      | -4681 | -1338 | N |
| ATOM   | 623 | CA  | ARG | A | 101 | -6.503 | 22.269 | 34.798 | 1.00124.26 |       |       | C |
| ANISOU | 623 | CA  | ARG | A | 101 | 20162  | 16183  | 10869  | -7069      | -4424 | -1910 | C |
| ATOM   | 624 | C   | ARG | A | 101 | -6.985 | 21.637 | 33.498 | 1.00124.80 |       |       | C |
| ANISOU | 624 | C   | ARG | A | 101 | 20102  | 15991  | 11326  | -6532      | -4406 | -2160 | C |
| ATOM   | 625 | O   | ARG | A | 101 | -7.923 | 22.126 | 32.873 | 1.00121.53 |       |       | O |
| ANISOU | 625 | O   | ARG | A | 101 | 20057  | 15225  | 10893  | -5965      | -4206 | -2640 | O |
| ATOM   | 626 | CB  | ARG | A | 101 | -5.712 | 23.542 | 34.499 | 1.00126.32 |       |       | C |
| ANISOU | 626 | CB  | ARG | A | 101 | 20897  | 16254  | 10845  | -7280      | -4341 | -1891 | C |
| ATOM   | 627 | CG  | ARG | A | 101 | -5.322 | 24.339 | 35.733 | 1.00143.33 |       |       | C |
| ANISOU | 627 | CG  | ARG | A | 101 | 23309  | 18582  | 12567  | -7793      | -4325 | -1705 | C |
| ATOM   | 628 | CD  | ARG | A | 101 | -4.820 | 25.724 | 35.355 | 1.00155.28 |       |       | C |

|        |     |     |     |   |     |         |        |        |            |       |       |   |
|--------|-----|-----|-----|---|-----|---------|--------|--------|------------|-------|-------|---|
| ANISOU | 628 | CD  | ARG | A | 101 | 25400   | 19815  | 13783  | -7897      | -4184 | -1799 | C |
| ATOM   | 629 | NE  | ARG | A | 101 | -4.474  | 26.524 | 36.526 | 1.00155.08 |       |       | N |
| ANISOU | 629 | NE  | ARG | A | 101 | 25678   | 19915  | 13331  | -8408      | -4159 | -1633 | N |
| ATOM   | 630 | CZ  | ARG | A | 101 | -3.248  | 26.622 | 37.025 | 1.00159.55 |       |       | C |
| ANISOU | 630 | CZ  | ARG | A | 101 | 26114   | 20765  | 13743  | -9091      | -4331 | -1155 | C |
| ATOM   | 631 | NH1 | ARG | A | 101 | -2.243  | 25.972 | 36.455 | 1.00156.88 |       |       | N |
| ANISOU | 631 | NH1 | ARG | A | 101 | 25295   | 20641  | 13672  | -9325      | -4540 | -788  | N |
| ATOM   | 632 | NH2 | ARG | A | 101 | -3.025  | 27.374 | 38.093 | 1.00172.12 |       |       | N |
| ANISOU | 632 | NH2 | ARG | A | 101 | 28041   | 22433  | 14924  | -9546      | -4294 | -1034 | N |
| ATOM   | 633 | N   | ALA | A | 102 | -6.335  | 20.548 | 33.097 | 1.00132.70 |       |       | N |
| ANISOU | 633 | N   | ALA | A | 102 | 20447   | 17149  | 12825  | -6507      | -4476 | -1738 | N |
| ATOM   | 634 | CA  | ALA | A | 102 | -6.695  | 19.838 | 31.873 | 1.00130.02 |       |       | C |
| ANISOU | 634 | CA  | ALA | A | 102 | 19849   | 16548  | 13004  | -5847      | -4309 | -1846 | C |
| ATOM   | 635 | C   | ALA | A | 102 | -7.863  | 18.885 | 32.106 | 1.00130.55 |       |       | C |
| ANISOU | 635 | C   | ALA | A | 102 | 19609   | 16668  | 13327  | -5420      | -4237 | -2005 | C |
| ATOM   | 636 | O   | ALA | A | 102 | -8.723  | 18.711 | 31.238 | 1.00118.50 |       |       | O |
| ANISOU | 636 | O   | ALA | A | 102 | 18169   | 14852  | 12001  | -4838      | -4093 | -2365 | O |
| ATOM   | 637 | CB  | ALA | A | 102 | -5.495  | 19.082 | 31.325 | 1.00116.57 |       |       | C |
| ANISOU | 637 | CB  | ALA | A | 102 | 17569   | 14954  | 11767  | -5928      | -4322 | -1316 | C |
| ATOM   | 638 | N   | ARG | A | 103 | -7.886  | 18.266 | 33.280 | 1.00114.78 |       |       | N |
| ANISOU | 638 | N   | ARG | A | 103 | 17262   | 15046  | 11304  | -5742      | -4349 | -1728 | N |
| ATOM   | 639 | CA  | ARG | A | 103 | -8.971  | 17.364 | 33.637 | 1.00126.72 |       |       | C |
| ANISOU | 639 | CA  | ARG | A | 103 | 18491   | 16644  | 13011  | -5433      | -4276 | -1861 | C |
| ATOM   | 640 | C   | ARG | A | 103 | -9.945  | 18.023 | 34.607 | 1.00129.78 |       |       | C |
| ANISOU | 640 | C   | ARG | A | 103 | 19297   | 17102  | 12912  | -5564      | -4253 | -2255 | C |
| ATOM   | 641 | O   | ARG | A | 103 | -10.362 | 17.413 | 35.591 | 1.00115.57 |       |       | O |
| ANISOU | 641 | O   | ARG | A | 103 | 17255   | 15579  | 11076  | -5742      | -4279 | -2151 | O |
| ATOM   | 642 | CB  | ARG | A | 103 | -8.425  | 16.052 | 34.203 | 1.00115.05 |       |       | C |
| ANISOU | 642 | CB  | ARG | A | 103 | 16319   | 15499  | 11894  | -5631      | -4381 | -1283 | C |
| ATOM   | 643 | CG  | ARG | A | 103 | -7.946  | 15.086 | 33.126 | 1.00125.71 |       |       | C |
| ANISOU | 643 | CG  | ARG | A | 103 | 17204   | 16710  | 13850  | -5253      | -4296 | -1019 | C |
| ATOM   | 644 | CD  | ARG | A | 103 | -9.101  | 14.649 | 32.229 | 1.00138.51 |       |       | C |
| ANISOU | 644 | CD  | ARG | A | 103 | 18862   | 18035  | 15730  | -4605      | -4096 | -1449 | C |
| ATOM   | 645 | NE  | ARG | A | 103 | -8.650  | 13.930 | 31.039 | 1.00139.05 |       |       | N |
| ANISOU | 645 | NE  | ARG | A | 103 | 18649   | 17881  | 16302  | -4242      | -3978 | -1281 | N |
| ATOM   | 646 | CZ  | ARG | A | 103 | -8.500  | 14.487 | 29.840 | 1.00135.96 |       |       | C |
| ANISOU | 646 | CZ  | ARG | A | 103 | 18563   | 17142  | 15953  | -3964      | -3868 | -1512 | C |
| ATOM   | 647 | NH1 | ARG | A | 103 | -8.766  | 15.775 | 29.665 | 1.00127.77 |       |       | N |
| ANISOU | 647 | NH1 | ARG | A | 103 | 18123   | 15933  | 14492  | -3989      | -3881 | -1911 | N |
| ATOM   | 648 | NH2 | ARG | A | 103 | -8.087  | 13.755 | 28.814 | 1.00136.36 |       |       | N |
| ANISOU | 648 | NH2 | ARG | A | 103 | 18363   | 16995  | 16455  | -3663      | -3731 | -1347 | N |
| ATOM   | 649 | N   | LYS | A | 104 | -10.289 | 19.275 | 34.304 | 1.00129.69 |       |       | N |
| ANISOU | 649 | N   | LYS | A | 104 | 19939   | 16815  | 12520  | -5470      | -4184 | -2706 | N |
| ATOM   | 650 | CA  | LYS | A | 104 | -11.288 | 20.060 | 35.036 | 1.00128.23 |       |       | C |
| ANISOU | 650 | CA  | LYS | A | 104 | 20244   | 16602  | 11877  | -5479      | -4096 | -3171 | C |
| ATOM   | 651 | C   | LYS | A | 104 | -11.249 | 19.895 | 36.553 | 1.00129.80 |       |       | C |
| ANISOU | 651 | C   | LYS | A | 104 | 20333   | 17172  | 11812  | -5984      | -4127 | -2942 | C |
| ATOM   | 652 | O   | LYS | A | 104 | -12.293 | 19.821 | 37.205 | 1.00120.14 |       |       | O |
| ANISOU | 652 | O   | LYS | A | 104 | 19153   | 16022  | 10473  | -5853      | -3985 | -3226 | O |
| ATOM   | 653 | CB  | LYS | A | 104 | -12.697 | 19.778 | 34.505 | 1.00130.64 |       |       | C |
| ANISOU | 653 | CB  | LYS | A | 104 | 20504   | 16729  | 12405  | -4794      | -3918 | -3648 | C |
| ATOM   | 654 | CG  | LYS | A | 104 | -12.920 | 20.216 | 33.064 | 1.00112.60 |       |       | C |
| ANISOU | 654 | CG  | LYS | A | 104 | 18472   | 14020  | 10292  | -4230      | -3856 | -3951 | C |
| ATOM   | 655 | CD  | LYS | A | 104 | -14.400 | 20.404 | 32.778 | 1.00154.07 |       |       | C |
| ANISOU | 655 | CD  | LYS | A | 104 | 23875   | 19101  | 15563  | -3639      | -3716 | -4512 | C |
| ATOM   | 656 | CE  | LYS | A | 104 | -14.656 | 20.708 | 31.311 | 1.00143.22 |       |       | C |
| ANISOU | 656 | CE  | LYS | A | 104 | 22655   | 17334  | 14426  | -3034      | -3664 | -4746 | C |
| ATOM   | 657 | NZ  | LYS | A | 104 | -14.436 | 19.517 | 30.445 | 1.00129.83 |       |       | N |
| ANISOU | 657 | NZ  | LYS | A | 104 | 20480   | 15615  | 13233  | -2834      | -3717 | -4516 | N |
| ATOM   | 658 | N   | PHE | A | 105 | -10.038 | 19.839 | 37.098 | 1.00143.37 |       |       | N |
| ANISOU | 658 | N   | PHE | A | 105 | 21901   | 19125  | 13448  | -6556      | -4303 | -2417 | N |
| ATOM   | 659 | CA  | PHE | A | 105 | -9.823  | 19.664 | 38.533 | 1.00151.19 |       |       | C |
| ANISOU | 659 | CA  | PHE | A | 105 | 22792   | 20460  | 14194  | -7072      | -4358 | -2105 | C |
| ATOM   | 660 | C   | PHE | A | 105 | -10.420 | 18.363 | 39.054 | 1.00137.80 |       |       | C |
| ANISOU | 660 | C   | PHE | A | 105 | 20617   | 19035  | 12704  | -7094      | -4426 | -2000 | C |
| ATOM   | 661 | O   | PHE | A | 105 | -11.391 | 18.359 | 39.810 | 1.00132.12 |       |       | O |
| ANISOU | 661 | O   | PHE | A | 105 | 20024   | 18381  | 11792  | -7051      | -4265 | -2271 | O |
| ATOM   | 662 | CB  | PHE | A | 105 | -10.337 | 20.872 | 39.320 | 1.00168.24 |       |       | C |
| ANISOU | 662 | CB  | PHE | A | 105 | 25537   | 22501  | 15884  | -7112      | -4123 | -2415 | C |
| ATOM   | 663 | CG  | PHE | A | 105 | -9.454  | 22.080 | 39.205 | 1.00175.00 |       |       | C |

|        |     |     |     |   |     |         |        |        |            |       |       |   |
|--------|-----|-----|-----|---|-----|---------|--------|--------|------------|-------|-------|---|
| ANISOU | 663 | CG  | PHE | A | 105 | 26818   | 23193  | 16483  | -7332      | -4101 | -2317 | C |
| ATOM   | 664 | CD1 | PHE | A | 105 | -8.737  | 22.537 | 40.298 | 1.00164.62 |       |       | C |
| ANISOU | 664 | CD1 | PHE | A | 105 | 25665   | 22063  | 14819  | -7933      | -4151 | -1983 | C |
| ATOM   | 665 | CD2 | PHE | A | 105 | -9.323  | 22.746 | 37.998 | 1.00181.25 |       |       | C |
| ANISOU | 665 | CD2 | PHE | A | 105 | 27855   | 23640  | 17370  | -6965      | -4032 | -2542 | C |
| ATOM   | 666 | CE1 | PHE | A | 105 | -7.916  | 23.641 | 40.192 | 1.00156.92 |       |       | C |
| ANISOU | 666 | CE1 | PHE | A | 105 | 25080   | 20943  | 13599  | -8182      | -4130 | -1885 | C |
| ATOM   | 667 | CE2 | PHE | A | 105 | -8.502  | 23.849 | 37.886 | 1.00179.70 |       |       | C |
| ANISOU | 667 | CE2 | PHE | A | 105 | 28051   | 23296  | 16930  | -7202      | -4002 | -2440 | C |
| ATOM   | 668 | CZ  | PHE | A | 105 | -7.795  | 24.295 | 38.984 | 1.00163.63 |       |       | C |
| ANISOU | 668 | CZ  | PHE | A | 105 | 26163   | 21459  | 14551  | -7823      | -4052 | -2114 | C |
| ATOM   | 669 | N   | ASN | A | 106 | -9.820  | 17.259 | 38.627 | 1.00132.04 |       |       | N |
| ANISOU | 669 | N   | ASN | A | 106 | 19297   | 18433  | 12438  | -7073      | -4589 | -1570 | N |
| ATOM   | 670 | CA  | ASN | A | 106 | -10.206 | 15.932 | 39.070 | 1.00127.03 |       |       | C |
| ANISOU | 670 | CA  | ASN | A | 106 | 18125   | 18015  | 12125  | -6998      | -4590 | -1331 | C |
| ATOM   | 671 | C   | ASN | A | 106 | -8.935  | 15.117 | 39.244 | 1.00129.19 |       |       | C |
| ANISOU | 671 | C   | ASN | A | 106 | 17871   | 18528  | 12686  | -7319      | -4842 | -607  | C |
| ATOM   | 672 | O   | ASN | A | 106 | -8.233  | 14.847 | 38.271 | 1.00130.16 |       |       | O |
| ANISOU | 672 | O   | ASN | A | 106 | 17715   | 18523  | 13216  | -7072      | -4856 | -389  | O |
| ATOM   | 673 | CB  | ASN | A | 106 | -11.120 | 15.275 | 38.036 | 1.00128.16 |       |       | C |
| ANISOU | 673 | CB  | ASN | A | 106 | 18034   | 17920  | 12742  | -6270      | -4374 | -1636 | C |
| ATOM   | 674 | CG  | ASN | A | 106 | -11.787 | 14.018 | 38.557 | 1.00138.94 |       |       | C |
| ANISOU | 674 | CG  | ASN | A | 106 | 18967   | 19476  | 14349  | -6198      | -4324 | -1519 | C |
| ATOM   | 675 | OD1 | ASN | A | 106 | -11.139 | 12.988 | 38.744 | 1.00148.77 |       |       | O |
| ANISOU | 675 | OD1 | ASN | A | 106 | 19742   | 20886  | 15899  | -6339      | -4456 | -990  | O |
| ATOM   | 676 | ND2 | ASN | A | 106 | -13.095 | 14.092 | 38.779 | 1.00140.51 |       |       | N |
| ANISOU | 676 | ND2 | ASN | A | 106 | 19321   | 19647  | 14421  | -5969      | -4123 | -2011 | N |
| ATOM   | 677 | N   | VAL | A | 107 | -8.635  | 14.739 | 40.482 | 1.00138.80 |       |       | N |
| ANISOU | 677 | N   | VAL | A | 107 | 18963   | 20089  | 13688  | -7866      | -5036 | -230  | N |
| ATOM   | 678 | CA  | VAL | A | 107 | -7.374  | 14.072 | 40.796 | 1.00153.09 |       |       | C |
| ANISOU | 678 | CA  | VAL | A | 107 | 20287   | 22163  | 15716  | -8226      | -5329 | 497   | C |
| ATOM   | 679 | C   | VAL | A | 107 | -7.234  | 12.731 | 40.082 | 1.00152.75 |       |       | C |
| ANISOU | 679 | C   | VAL | A | 107 | 19610   | 22062  | 16367  | -7749      | -5280 | 807   | C |
| ATOM   | 680 | O   | VAL | A | 107 | -6.156  | 12.388 | 39.594 | 1.00144.79 |       |       | O |
| ANISOU | 680 | O   | VAL | A | 107 | 18210   | 21085  | 15717  | -7733      | -5402 | 1264  | O |
| ATOM   | 681 | CB  | VAL | A | 107 | -7.211  | 13.858 | 42.310 | 1.00166.68 |       |       | C |
| ANISOU | 681 | CB  | VAL | A | 107 | 22026   | 24202  | 17104  | -8750      | -5457 | 848   | C |
| ATOM   | 682 | CG1 | VAL | A | 107 | -5.759  | 13.560 | 42.648 | 1.00167.77 |       |       | C |
| ANISOU | 682 | CG1 | VAL | A | 107 | 21785   | 24574  | 17384  | -9088      | -5728 | 1589  | C |
| ATOM   | 683 | CG2 | VAL | A | 107 | -7.687  | 15.084 | 43.064 | 1.00177.37 |       |       | C |
| ANISOU | 683 | CG2 | VAL | A | 107 | 24062   | 25489  | 17841  | -8968      | -5267 | 456   | C |
| ATOM   | 684 | N   | GLY | A | 108 | -8.327  | 11.977 | 40.024 | 1.00123.58 |       |       | N |
| ANISOU | 684 | N   | GLY | A | 108 | 15820   | 18277  | 12856  | -7371      | -5083 | 552   | N |
| ATOM   | 685 | CA  | GLY | A | 108 | -8.328  | 10.692 | 39.351 | 1.00121.63 |       |       | C |
| ANISOU | 685 | CA  | GLY | A | 108 | 15058   | 17928  | 13228  | -6919      | -5001 | 788   | C |
| ATOM   | 686 | C   | GLY | A | 108 | -8.120  | 10.835 | 37.856 | 1.00139.54 |       |       | C |
| ANISOU | 686 | C   | GLY | A | 108 | 17280   | 19858  | 15880  | -6386      | -4830 | 615   | C |
| ATOM   | 687 | O   | GLY | A | 108 | -7.230  | 10.205 | 37.282 | 1.00135.43 |       |       | O |
| ANISOU | 687 | O   | GLY | A | 108 | 16354   | 19299  | 15805  | -6242      | -4866 | 1040  | O |
| ATOM   | 688 | N   | ARG | A | 109 | -8.944  | 11.671 | 37.230 | 1.00134.06 |       |       | N |
| ANISOU | 688 | N   | ARG | A | 109 | 17019   | 18911  | 15007  | -6087      | -4636 | -8    | N |
| ATOM   | 689 | CA  | ARG | A | 109 | -8.856  | 11.924 | 35.795 | 1.00126.91 |       |       | C |
| ANISOU | 689 | CA  | ARG | A | 109 | 16180   | 17653  | 14386  | -5598      | -4475 | -237  | C |
| ATOM   | 690 | C   | ARG | A | 109 | -7.494  | 12.485 | 35.405 | 1.00127.64 |       |       | C |
| ANISOU | 690 | C   | ARG | A | 109 | 16251   | 17744  | 14502  | -5819      | -4592 | 90    | C |
| ATOM   | 691 | O   | ARG | A | 109 | -6.956  | 12.147 | 34.352 | 1.00137.69 |       |       | O |
| ANISOU | 691 | O   | ARG | A | 109 | 17311   | 18819  | 16185  | -5504      | -4494 | 222   | O |
| ATOM   | 692 | CB  | ARG | A | 109 | -9.955  | 12.894 | 35.355 | 1.00131.13 |       |       | C |
| ANISOU | 692 | CB  | ARG | A | 109 | 17249   | 17945  | 14632  | -5308      | -4308 | -945  | C |
| ATOM   | 693 | CG  | ARG | A | 109 | -11.363 | 12.383 | 35.580 | 1.00146.47 |       |       | C |
| ANISOU | 693 | CG  | ARG | A | 109 | 19170   | 19886  | 16596  | -5032      | -4161 | -1318 | C |
| ATOM   | 694 | CD  | ARG | A | 109 | -11.696 | 11.240 | 34.640 | 1.00170.12 |       |       | C |
| ANISOU | 694 | CD  | ARG | A | 109 | 21802   | 22701  | 20136  | -4539      | -4030 | -1290 | C |
| ATOM   | 695 | NE  | ARG | A | 109 | -12.727 | 10.371 | 35.199 | 1.00192.60 |       |       | N |
| ANISOU | 695 | NE  | ARG | A | 109 | 24448   | 25683  | 23047  | -4482      | -3952 | -1396 | N |
| ATOM   | 696 | CZ  | ARG | A | 109 | -14.033 | 10.596 | 35.106 | 1.00203.81 |       |       | C |
| ANISOU | 696 | CZ  | ARG | A | 109 | 26043   | 27044  | 24353  | -4218      | -3807 | -1938 | C |
| ATOM   | 697 | NH1 | ARG | A | 109 | -14.481 | 11.671 | 34.472 | 1.00217.38 |       |       | N |
| ANISOU | 697 | NH1 | ARG | A | 109 | 28156   | 28548  | 25890  | -3947      | -3743 | -2418 | N |
| ATOM   | 698 | NH2 | ARG | A | 109 | -14.892 | 9.746  | 35.650 | 1.00196.58 |       |       | N |

|        |     |     |     |   |     |        |        |        |            |       |       |   |
|--------|-----|-----|-----|---|-----|--------|--------|--------|------------|-------|-------|---|
| ANISOU | 698 | NH2 | ARG | A | 109 | 24901  | 26285  | 23505  | -4227      | -3729 | -1992 | N |
| ATOM   | 699 | N   | ALA | A | 110 | -6.944 | 13.342 | 36.260 | 1.00126.35 |       |       | N |
| ANISOU | 699 | N   | ALA | A | 110 | 16320  | 17805  | 13883  | -6387      | -4787 | 212   | N |
| ATOM   | 700 | CA  | ALA | A | 110 | -5.661 | 13.981 | 35.990 | 1.00128.83 |       |       | C |
| ANISOU | 700 | CA  | ALA | A | 110 | 16633  | 18165  | 14154  | -6693      | -4915 | 509   | C |
| ATOM   | 701 | C   | ALA | A | 110 | -4.524 | 12.966 | 35.923 | 1.00133.30 |       |       | C |
| ANISOU | 701 | C   | ALA | A | 110 | 16515  | 18916  | 15217  | -6750      | -5034 | 1198  | C |
| ATOM   | 702 | O   | ALA | A | 110 | -3.635 | 13.077 | 35.082 | 1.00121.66 |       |       | O |
| ANISOU | 702 | O   | ALA | A | 110 | 14871  | 17345  | 14009  | -6658      | -4986 | 1382  | O |
| ATOM   | 703 | CB  | ALA | A | 110 | -5.365 | 15.040 | 37.032 | 1.00123.18 |       |       | C |
| ANISOU | 703 | CB  | ALA | A | 110 | 16320  | 17673  | 12809  | -7355      | -5120 | 511   | C |
| ATOM   | 704 | N   | TYR | A | 111 | -4.556 | 11.977 | 36.810 | 1.00133.91 |       |       | N |
| ANISOU | 704 | N   | TYR | A | 111 | 16206  | 19252  | 15420  | -6893      | -5175 | 1579  | N |
| ATOM   | 705 | CA  | TYR | A | 111 | -3.535 | 10.933 | 36.818 | 1.00138.39 |       |       | C |
| ANISOU | 705 | CA  | TYR | A | 111 | 16110  | 19988  | 16485  | -6896      | -5296 | 2258  | C |
| ATOM   | 706 | C   | TYR | A | 111 | -3.644 | 10.040 | 35.584 | 1.00136.45 |       |       | C |
| ANISOU | 706 | C   | TYR | A | 111 | 15576  | 19417  | 16854  | -6226      | -5010 | 2228  | C |
| ATOM   | 707 | O   | TYR | A | 111 | -2.634 | 9.582  | 35.047 | 1.00133.02 |       |       | O |
| ANISOU | 707 | O   | TYR | A | 111 | 14706  | 18980  | 16857  | -6109      | -4992 | 2652  | O |
| ATOM   | 708 | CB  | TYR | A | 111 | -3.630 | 10.089 | 38.092 | 1.00138.88 |       |       | C |
| ANISOU | 708 | CB  | TYR | A | 111 | 15905  | 20368  | 16495  | -7200      | -5527 | 2659  | C |
| ATOM   | 709 | CG  | TYR | A | 111 | -2.629 | 8.957  | 38.145 | 1.00141.47 |       |       | C |
| ANISOU | 709 | CG  | TYR | A | 111 | 15547  | 20851  | 17353  | -7151      | -5667 | 3382  | C |
| ATOM   | 710 | CD1 | TYR | A | 111 | -1.294 | 9.199  | 38.435 | 1.00150.74 |       |       | C |
| ANISOU | 710 | CD1 | TYR | A | 111 | 16395  | 22313  | 18566  | -7548      | -5941 | 3933  | C |
| ATOM   | 711 | CD2 | TYR | A | 111 | -3.019 | 7.646  | 37.903 | 1.00142.37 |       |       | C |
| ANISOU | 711 | CD2 | TYR | A | 111 | 15339  | 20821  | 17933  | -6705      | -5525 | 3521  | C |
| ATOM   | 712 | CE1 | TYR | A | 111 | -0.373 | 8.169  | 38.481 | 1.00158.58 |       |       | C |
| ANISOU | 712 | CE1 | TYR | A | 111 | 16723  | 23452  | 20078  | -7455      | -6069 | 4611  | C |
| ATOM   | 713 | CE2 | TYR | A | 111 | -2.105 | 6.609  | 37.949 | 1.00149.95 |       |       | C |
| ANISOU | 713 | CE2 | TYR | A | 111 | 15699  | 21886  | 19390  | -6615      | -5635 | 4187  | C |
| ATOM   | 714 | CZ  | TYR | A | 111 | -0.784 | 6.876  | 38.237 | 1.00159.55 |       |       | C |
| ANISOU | 714 | CZ  | TYR | A | 111 | 16564  | 23394  | 20666  | -6966      | -5908 | 4735  | C |
| ATOM   | 715 | OH  | TYR | A | 111 | 0.130  | 5.848  | 38.284 | 1.00168.19 |       |       | O |
| ANISOU | 715 | OH  | TYR | A | 111 | 17021  | 24597  | 22287  | -6831      | -6019 | 5414  | O |
| ATOM   | 716 | N   | GLU | A | 112 | -4.875 | 9.797  | 35.141 | 1.00133.57 |       |       | N |
| ANISOU | 716 | N   | GLU | A | 112 | 15453  | 18781  | 16515  | -5799      | -4780 | 1726  | N |
| ATOM   | 717 | CA  | GLU | A | 112 | -5.114 | 8.985  | 33.955 | 1.00136.26 |       |       | C |
| ANISOU | 717 | CA  | GLU | A | 112 | 15620  | 18782  | 17371  | -5191      | -4503 | 1632  | C |
| ATOM   | 718 | C   | GLU | A | 112 | -4.523 | 9.658  | 32.724 | 1.00138.65 |       |       | C |
| ANISOU | 718 | C   | GLU | A | 112 | 16066  | 18823  | 17793  | -4988      | -4343 | 1486  | C |
| ATOM   | 719 | O   | GLU | A | 112 | -4.010 | 8.992  | 31.824 | 1.00143.41 |       |       | O |
| ANISOU | 719 | O   | GLU | A | 112 | 16378  | 19233  | 18879  | -4648      | -4165 | 1684  | O |
| ATOM   | 720 | CB  | GLU | A | 112 | -6.612 | 8.746  | 33.759 | 1.00142.72 |       |       | C |
| ANISOU | 720 | CB  | GLU | A | 112 | 16714  | 19397  | 18116  | -4847      | -4327 | 1080  | C |
| ATOM   | 721 | CG  | GLU | A | 112 | -7.267 | 7.973  | 34.891 | 1.00150.78 |       |       | C |
| ANISOU | 721 | CG  | GLU | A | 112 | 17593  | 20649  | 19049  | -5027      | -4427 | 1200  | C |
| ATOM   | 722 | CD  | GLU | A | 112 | -6.700 | 6.575  | 35.050 | 1.00151.69 |       |       | C |
| ANISOU | 722 | CD  | GLU | A | 112 | 17175  | 20823  | 19638  | -4951      | -4458 | 1789  | C |
| ATOM   | 723 | OE1 | GLU | A | 112 | -6.373 | 5.943  | 34.022 | 1.00138.84 |       |       | O |
| ANISOU | 723 | OE1 | GLU | A | 112 | 15340  | 18931  | 18484  | -4535      | -4271 | 1894  | O |
| ATOM   | 724 | OE2 | GLU | A | 112 | -6.577 | 6.109  | 36.203 | 1.00160.84 |       |       | O |
| ANISOU | 724 | OE2 | GLU | A | 112 | 18155  | 22273  | 20684  | -5307      | -4664 | 2152  | O |
| ATOM   | 725 | N   | LEU | A | 113 | -4.600 | 10.984 | 32.695 | 1.00136.91 |       |       | N |
| ANISOU | 725 | N   | LEU | A | 113 | 16332  | 18576  | 17112  | -5207      | -4387 | 1133  | N |
| ATOM   | 726 | CA  | LEU | A | 113 | -4.004 | 11.763 | 31.622 | 1.00131.81 |       |       | C |
| ANISOU | 726 | CA  | LEU | A | 113 | 15900  | 17695  | 16488  | -5110      | -4257 | 992   | C |
| ATOM   | 727 | C   | LEU | A | 113 | -2.490 | 11.609 | 31.682 | 1.00122.52 |       |       | C |
| ANISOU | 727 | C   | LEU | A | 113 | 14253  | 16742  | 15557  | -5400      | -4355 | 1608  | C |
| ATOM   | 728 | O   | LEU | A | 113 | -1.822 | 11.514 | 30.653 | 1.00117.78 |       |       | O |
| ANISOU | 728 | O   | LEU | A | 113 | 13512  | 15949  | 15290  | -5174      | -4163 | 1700  | O |
| ATOM   | 729 | CB  | LEU | A | 113 | -4.385 | 13.237 | 31.767 | 1.00114.43 |       |       | C |
| ANISOU | 729 | CB  | LEU | A | 113 | 14359  | 15436  | 13684  | -5353      | -4318 | 525   | C |
| ATOM   | 730 | CG  | LEU | A | 113 | -4.744 | 14.008 | 30.496 | 1.00114.41 |       |       | C |
| ANISOU | 730 | CG  | LEU | A | 113 | 14859  | 15001  | 13610  | -4993      | -4107 | 14    | C |
| ATOM   | 731 | CD1 | LEU | A | 113 | -5.039 | 15.464 | 30.823 | 1.00115.01 |       |       | C |
| ANISOU | 731 | CD1 | LEU | A | 113 | 15597  | 15038  | 13065  | -5280      | -4196 | -381  | C |
| ATOM   | 732 | CD2 | LEU | A | 113 | -3.644 | 13.906 | 29.455 | 1.00112.66 |       |       | C |
| ANISOU | 732 | CD2 | LEU | A | 113 | 14435  | 14633  | 13738  | -4901      | -3965 | 270   | C |
| ATOM   | 733 | N   | LEU | A | 114 | -1.960 | 11.578 | 32.901 | 1.00121.07 |       |       | N |



|        |     |     |     |   |     |        |        |        |            |       |      |   |
|--------|-----|-----|-----|---|-----|--------|--------|--------|------------|-------|------|---|
| ANISOU | 733 | N   | LEU | A | 114 | 13819  | 16976  | 15205  | -5913      | -4655 | 2033 | N |
| ATOM   | 734 | CA  | LEU | A | 114 | -0.525 | 11.450 | 33.119 | 1.00124.96 |       |      | C |
| ANISOU | 734 | CA  | LEU | A | 114 | 13803  | 17762  | 15914  | -6244      | -4814 | 2663 | C |
| ATOM   | 735 | C   | LEU | A | 114 | -0.027 | 10.081 | 32.672 | 1.00128.05 |       |      | C |
| ANISOU | 735 | C   | LEU | A | 114 | 13543  | 18109  | 17002  | -5837      | -4680 | 3115 | C |
| ATOM   | 736 | O   | LEU | A | 114 | 1.095  | 9.946  | 32.182 | 1.00129.75 |       |      | O |
| ANISOU | 736 | O   | LEU | A | 114 | 13351  | 18379  | 17570  | -5829      | -4621 | 3494 | O |
| ATOM   | 737 | CB  | LEU | A | 114 | -0.183 | 11.693 | 34.589 | 1.00130.27 |       |      | C |
| ANISOU | 737 | CB  | LEU | A | 114 | 14390  | 18898  | 16210  | -6902      | -5212 | 3011 | C |
| ATOM   | 738 | CG  | LEU | A | 114 | 1.295  | 11.623 | 34.976 | 1.00142.90 |       |      | C |
| ANISOU | 738 | CG  | LEU | A | 114 | 15434  | 20881  | 17982  | -7327      | -5464 | 3700 | C |
| ATOM   | 739 | CD1 | LEU | A | 114 | 2.124  | 12.559 | 34.112 | 1.00146.40 |       |      | C |
| ANISOU | 739 | CD1 | LEU | A | 114 | 15987  | 21242  | 18398  | -7448      | -5348 | 3623 | C |
| ATOM   | 740 | CD2 | LEU | A | 114 | 1.474  | 11.953 | 36.449 | 1.00144.47 |       |      | C |
| ANISOU | 740 | CD2 | LEU | A | 114 | 15674  | 21513  | 17703  | -8020      | -5886 | 3974 | C |
| ATOM   | 741 | N   | ARG | A | 115 | -0.867 | 9.067  | 32.843 | 1.00135.92 |       |      | N |
| ANISOU | 741 | N   | ARG | A | 115 | 14450  | 18999  | 18192  | -5504      | -4610 | 3069 | N |
| ATOM   | 742 | CA  | ARG | A | 115 | -0.543 | 7.732  | 32.363 | 1.00158.81 |       |      | C |
| ANISOU | 742 | CA  | ARG | A | 115 | 16837  | 21770  | 21733  | -5063      | -4436 | 3433 | C |
| ATOM   | 743 | C   | ARG | A | 115 | -0.463 | 7.737  | 30.841 | 1.00173.73 |       |      | C |
| ANISOU | 743 | C   | ARG | A | 115 | 18838  | 23232  | 23938  | -4578      | -4043 | 3159 | C |
| ATOM   | 744 | O   | ARG | A | 115 | 0.462  | 7.172  | 30.258 | 1.00180.61 |       |      | O |
| ANISOU | 744 | O   | ARG | A | 115 | 19276  | 24047  | 25300  | -4373      | -3881 | 3535 | O |
| ATOM   | 745 | CB  | ARG | A | 115 | -1.586 | 6.721  | 32.836 | 1.00164.46 |       |      | C |
| ANISOU | 745 | CB  | ARG | A | 115 | 17551  | 22420  | 22514  | -4845      | -4426 | 3364 | C |
| ATOM   | 746 | CG  | ARG | A | 115 | -1.651 | 6.551  | 34.342 | 1.00166.17 |       |      | C |
| ANISOU | 746 | CG  | ARG | A | 115 | 17651  | 23040  | 22447  | -5317      | -4790 | 3679 | C |
| ATOM   | 747 | CD  | ARG | A | 115 | -2.677 | 5.500  | 34.724 | 1.00172.54 |       |      | C |
| ANISOU | 747 | CD  | ARG | A | 115 | 18466  | 23755  | 23338  | -5099      | -4734 | 3604 | C |
| ATOM   | 748 | NE  | ARG | A | 115 | -2.308 | 4.171  | 34.245 | 1.00182.01 |       |      | N |
| ANISOU | 748 | NE  | ARG | A | 115 | 19225  | 24776  | 25154  | -4675      | -4573 | 3992 | N |
| ATOM   | 749 | CZ  | ARG | A | 115 | -1.714 | 3.245  | 34.991 | 1.00193.49 |       |      | C |
| ANISOU | 749 | CZ  | ARG | A | 115 | 20226  | 26433  | 26858  | -4772      | -4766 | 4624 | C |
| ATOM   | 750 | NH1 | ARG | A | 115 | -1.420 | 3.500  | 36.259 | 1.00202.93 |       |      | N |
| ANISOU | 750 | NH1 | ARG | A | 115 | 21343  | 28037  | 27723  | -5311      | -5154 | 4948 | N |
| ATOM   | 751 | NH2 | ARG | A | 115 | -1.415 | 2.062  | 34.471 | 1.00192.75 |       |      | N |
| ANISOU | 751 | NH2 | ARG | A | 115 | 19791  | 26113  | 27331  | -4331      | -4574 | 4937 | N |
| ATOM   | 752 | N   | GLY | A | 116 | -1.433 | 8.386  | 30.205 | 1.00175.16 |       |      | N |
| ANISOU | 752 | N   | GLY | A | 116 | 19611  | 23111  | 23833  | -4394      | -3887 | 2507 | N |
| ATOM   | 753 | CA  | GLY | A | 116 | -1.451 | 8.510  | 28.760 | 1.00169.30 |       |      | C |
| ANISOU | 753 | CA  | GLY | A | 116 | 19089  | 21942  | 23294  | -3979      | -3542 | 2193 | C |
| ATOM   | 754 | C   | GLY | A | 116 | -0.346 | 9.425  | 28.271 | 1.00157.74 |       |      | C |
| ANISOU | 754 | C   | GLY | A | 116 | 17640  | 20516  | 21777  | -4215      | -3503 | 2296 | C |
| ATOM   | 755 | O   | GLY | A | 116 | 0.108  | 9.317  | 27.131 | 1.00156.72 |       |      | O |
| ANISOU | 755 | O   | GLY | A | 116 | 17495  | 20105  | 21946  | -3931      | -3201 | 2265 | O |
| ATOM   | 756 | N   | TYR | A | 117 | 0.083  | 10.332 | 29.142 | 1.00144.29 |       |      | N |
| ANISOU | 756 | N   | TYR | A | 117 | 15997  | 19160  | 19669  | -4772      | -3798 | 2413 | N |
| ATOM   | 757 | CA  | TYR | A | 117 | 1.190  | 11.228 | 28.841 | 1.00142.18 |       |      | C |
| ANISOU | 757 | CA  | TYR | A | 117 | 15718  | 18998  | 19307  | -5111      | -3804 | 2556 | C |
| ATOM   | 758 | C   | TYR | A | 117 | 2.469  | 10.424 | 28.665 | 1.00144.86 |       |      | C |
| ANISOU | 758 | C   | TYR | A | 117 | 15306  | 19509  | 20227  | -5067      | -3723 | 3194 | C |
| ATOM   | 759 | O   | TYR | A | 117 | 3.107  | 10.468 | 27.612 | 1.00142.47 |       |      | O |
| ANISOU | 759 | O   | TYR | A | 117 | 14924  | 19003  | 20207  | -4875      | -3424 | 3206 | O |
| ATOM   | 760 | CB  | TYR | A | 117 | 1.362  | 12.253 | 29.966 | 1.00149.88 |       |      | C |
| ANISOU | 760 | CB  | TYR | A | 117 | 16897  | 20339  | 19709  | -5774      | -4172 | 2595 | C |
| ATOM   | 761 | CG  | TYR | A | 117 | 2.491  | 13.241 | 29.751 | 1.00159.62 |       |      | C |
| ANISOU | 761 | CG  | TYR | A | 117 | 18152  | 21717  | 20780  | -6222      | -4213 | 2742 | C |
| ATOM   | 762 | CD1 | TYR | A | 117 | 2.281  | 14.423 | 29.054 | 1.00159.63 |       |      | C |
| ANISOU | 762 | CD1 | TYR | A | 117 | 18827  | 21437  | 20389  | -6290      | -4085 | 2243 | C |
| ATOM   | 763 | CD2 | TYR | A | 117 | 3.762  | 12.998 | 30.257 | 1.00163.90 |       |      | C |
| ANISOU | 763 | CD2 | TYR | A | 117 | 18041  | 22681  | 21552  | -6593      | -4394 | 3389 | C |
| ATOM   | 764 | CE1 | TYR | A | 117 | 3.303  | 15.330 | 28.857 | 1.00161.17 |       |      | C |
| ANISOU | 764 | CE1 | TYR | A | 117 | 19075  | 21753  | 20407  | -6743      | -4111 | 2368 | C |
| ATOM   | 765 | CE2 | TYR | A | 117 | 4.791  | 13.900 | 30.065 | 1.00167.26 |       |      | C |
| ANISOU | 765 | CE2 | TYR | A | 117 | 18458  | 23268  | 21825  | -7048      | -4431 | 3523 | C |
| ATOM   | 766 | CZ  | TYR | A | 117 | 4.555  | 15.065 | 29.365 | 1.00166.47 |       |      | C |
| ANISOU | 766 | CZ  | TYR | A | 117 | 19067  | 22871  | 21314  | -7139      | -4279 | 3003 | C |
| ATOM   | 767 | OH  | TYR | A | 117 | 5.573  | 15.969 | 29.168 | 1.00174.27 |       |      | O |
| ANISOU | 767 | OH  | TYR | A | 117 | 20083  | 24009  | 22124  | -7632      | -4303 | 3128 | O |
| ATOM   | 768 | N   | VAL | A | 118 | 2.834  | 9.687  | 29.709 | 1.00154.29 |       |      | N |

|        |     |     |     |   |     |        |        |        |            |       |      |   |
|--------|-----|-----|-----|---|-----|--------|--------|--------|------------|-------|------|---|
| ANISOU | 768 | N   | VAL | A | 118 | 15955  | 21073  | 21597  | -5239      | -3985 | 3729 | N |
| ATOM   | 769 | CA  | VAL | A | 118 | 4.050  | 8.886  | 29.702 | 1.00161.52 |       |      | C |
| ANISOU | 769 | CA  | VAL | A | 118 | 16089  | 22198  | 23082  | -5186      | -3960 | 4398 | C |
| ATOM   | 770 | C   | VAL | A | 118 | 3.999  | 7.818  | 28.615 | 1.00164.50 |       |      | C |
| ANISOU | 770 | C   | VAL | A | 118 | 16274  | 22171  | 24058  | -4510      | -3523 | 4396 | C |
| ATOM   | 771 | O   | VAL | A | 118 | 4.967  | 7.622  | 27.880 | 1.00172.09 |       |      | O |
| ANISOU | 771 | O   | VAL | A | 118 | 16863  | 23083  | 25442  | -4356      | -3268 | 4653 | O |
| ATOM   | 772 | CB  | VAL | A | 118 | 4.284  | 8.211  | 31.069 | 1.00159.07 |       |      | C |
| ANISOU | 772 | CB  | VAL | A | 118 | 15290  | 22320  | 22827  | -5448      | -4360 | 4962 | C |
| ATOM   | 773 | CG1 | VAL | A | 118 | 5.552  | 7.372  | 31.041 | 1.00165.53 |       |      | C |
| ANISOU | 773 | CG1 | VAL | A | 118 | 15266  | 23351  | 24276  | -5336      | -4348 | 5680 | C |
| ATOM   | 774 | CG2 | VAL | A | 118 | 4.355  | 9.258  | 32.171 | 1.00150.90 |       |      | C |
| ANISOU | 774 | CG2 | VAL | A | 118 | 14490  | 21681  | 21164  | -6166      | -4791 | 4970 | C |
| ATOM   | 775 | N   | ASN | A | 119 | 2.857  | 7.145  | 28.511 | 1.00152.39 |       |      | N |
| ANISOU | 775 | N   | ASN | A | 119 | 15011  | 20346  | 22544  | -4130      | -3418 | 4094 | N |
| ATOM   | 776 | CA  | ASN | A | 119 | 2.682  | 6.066  | 27.546 | 1.00149.79 |       |      | C |
| ANISOU | 776 | CA  | ASN | A | 119 | 14578  | 19604  | 22731  | -3516      | -3015 | 4068 | C |
| ATOM   | 777 | C   | ASN | A | 119 | 2.817  | 6.541  | 26.100 | 1.00166.97 |       |      | C |
| ANISOU | 777 | C   | ASN | A | 119 | 17091  | 21378  | 24973  | -3265      | -2606 | 3686 | C |
| ATOM   | 778 | O   | ASN | A | 119 | 3.170  | 5.760  | 25.216 | 1.00182.83 |       |      | O |
| ANISOU | 778 | O   | ASN | A | 119 | 18904  | 23096  | 27468  | -2841      | -2229 | 3798 | O |
| ATOM   | 779 | CB  | ASN | A | 119 | 1.334  | 5.374  | 27.757 | 1.00135.25 |       |      | C |
| ANISOU | 779 | CB  | ASN | A | 119 | 13035  | 17551  | 20803  | -3250      | -3019 | 3763 | C |
| ATOM   | 780 | CG  | ASN | A | 119 | 1.182  | 4.119  | 26.916 | 1.00134.72 |       |      | C |
| ANISOU | 780 | CG  | ASN | A | 119 | 12842  | 17081  | 21265  | -2671      | -2639 | 3811 | C |
| ATOM   | 781 | OD1 | ASN | A | 119 | 2.162  | 3.442  | 26.605 | 1.00126.72 |       |      | O |
| ANISOU | 781 | OD1 | ASN | A | 119 | 11340  | 16044  | 20763  | -2470      | -2449 | 4268 | O |
| ATOM   | 782 | ND2 | ASN | A | 119 | -0.053 | 3.804  | 26.543 | 1.00138.75 |       |      | N |
| ANISOU | 782 | ND2 | ASN | A | 119 | 13795  | 17269  | 21653  | -2405      | -2519 | 3337 | N |
| ATOM   | 783 | N   | PHE | A | 120 | 2.540  | 7.820  | 25.864 | 1.00163.26 |       |      | N |
| ANISOU | 783 | N   | PHE | A | 120 | 17166  | 20868  | 23997  | -3532      | -2668 | 3238 | N |
| ATOM   | 784 | CA  | PHE | A | 120 | 2.658  | 8.381  | 24.521 | 1.00163.70 |       |      | C |
| ANISOU | 784 | CA  | PHE | A | 120 | 17622  | 20539  | 24038  | -3352      | -2315 | 2865 | C |
| ATOM   | 785 | C   | PHE | A | 120 | 4.108  | 8.381  | 24.049 | 1.00163.79 |       |      | C |
| ANISOU | 785 | C   | PHE | A | 120 | 17148  | 20657  | 24427  | -3428      | -2098 | 3287 | C |
| ATOM   | 786 | O   | PHE | A | 120 | 4.393  | 8.086  | 22.888 | 1.00154.32 |       |      | O |
| ANISOU | 786 | O   | PHE | A | 120 | 15997  | 19103  | 23535  | -3089      | -1670 | 3196 | O |
| ATOM   | 787 | CB  | PHE | A | 120 | 2.084  | 9.798  | 24.463 | 1.00165.38 |       |      | C |
| ANISOU | 787 | CB  | PHE | A | 120 | 18542  | 20693  | 23602  | -3644      | -2465 | 2331 | C |
| ATOM   | 788 | CG  | PHE | A | 120 | 2.131  | 10.410 | 23.091 | 1.00162.33 |       |      | C |
| ANISOU | 788 | CG  | PHE | A | 120 | 18651  | 19882  | 23145  | -3473      | -2133 | 1932 | C |
| ATOM   | 789 | CD1 | PHE | A | 120 | 1.239  | 10.009 | 22.110 | 1.00158.83 |       |      | C |
| ANISOU | 789 | CD1 | PHE | A | 120 | 18619  | 18957  | 22773  | -2988      | -1878 | 1512 | C |
| ATOM   | 790 | CD2 | PHE | A | 120 | 3.067  | 11.382 | 22.782 | 1.00163.50 |       |      | C |
| ANISOU | 790 | CD2 | PHE | A | 120 | 18875  | 20114  | 23133  | -3829      | -2085 | 1982 | C |
| ATOM   | 791 | CE1 | PHE | A | 120 | 1.280  | 10.563 | 20.846 | 1.00155.02 |       |      | C |
| ANISOU | 791 | CE1 | PHE | A | 120 | 18634  | 18071  | 22197  | -2850      | -1592 | 1157 | C |
| ATOM   | 792 | CE2 | PHE | A | 120 | 3.112  | 11.942 | 21.520 | 1.00164.91 |       |      | C |
| ANISOU | 792 | CE2 | PHE | A | 120 | 19554  | 19884  | 23219  | -3695      | -1774 | 1618 | C |
| ATOM   | 793 | CZ  | PHE | A | 120 | 2.218  | 11.533 | 20.551 | 1.00160.76 |       |      | C |
| ANISOU | 793 | CZ  | PHE | A | 120 | 19456  | 18867  | 22758  | -3199      | -1532 | 1208 | C |
| ATOM   | 794 | N   | ARG | A | 121 | 5.020  | 8.714  | 24.956 | 1.00177.75 |       |      | N |
| ANISOU | 794 | N   | ARG | A | 121 | 18448  | 22925  | 26164  | -3895      | -2391 | 3749 | N |
| ATOM   | 795 | CA  | ARG | A | 121 | 6.445  | 8.674  | 24.654 | 1.00188.88 |       |      | C |
| ANISOU | 795 | CA  | ARG | A | 121 | 19265  | 24532  | 27967  | -4003      | -2227 | 4217 | C |
| ATOM   | 796 | C   | ARG | A | 121 | 6.911  | 7.236  | 24.467 | 1.00193.62 |       |      | C |
| ANISOU | 796 | C   | ARG | A | 121 | 19210  | 25068  | 29289  | -3519      | -1978 | 4681 | C |
| ATOM   | 797 | O   | ARG | A | 121 | 7.836  | 6.966  | 23.701 | 1.00200.96 |       |      | O |
| ANISOU | 797 | O   | ARG | A | 121 | 19775  | 25918  | 30663  | -3333      | -1610 | 4902 | O |
| ATOM   | 798 | CB  | ARG | A | 121 | 7.248  | 9.350  | 25.764 | 1.00189.59 |       |      | C |
| ANISOU | 798 | CB  | ARG | A | 121 | 18993  | 25215  | 27827  | -4659      | -2667 | 4622 | C |
| ATOM   | 799 | CG  | ARG | A | 121 | 7.207  | 10.863 | 25.708 | 1.00194.15 |       |      | C |
| ANISOU | 799 | CG  | ARG | A | 121 | 20170  | 25832  | 27766  | -5175      | -2796 | 4234 | C |
| ATOM   | 800 | CD  | ARG | A | 121 | 7.963  | 11.480 | 26.870 | 1.00212.11 |       |      | C |
| ANISOU | 800 | CD  | ARG | A | 121 | 22119  | 28696  | 29778  | -5873      | -3255 | 4641 | C |
| ATOM   | 801 | NE  | ARG | A | 121 | 8.276  | 12.885 | 26.627 | 1.00223.22 |       |      | N |
| ANISOU | 801 | NE  | ARG | A | 121 | 24005  | 30131  | 30678  | -6386      | -3286 | 4364 | N |
| ATOM   | 802 | CZ  | ARG | A | 121 | 7.405  | 13.880 | 26.762 | 1.00222.51 |       |      | C |
| ANISOU | 802 | CZ  | ARG | A | 121 | 24745  | 29864  | 29934  | -6601      | -3419 | 3824 | C |
| ATOM   | 803 | NH1 | ARG | A | 121 | 6.159  | 13.625 | 27.134 | 1.00214.64 |       |      | N |

|        |     |     |     |   |     |        |        |        |            |       |      |   |
|--------|-----|-----|-----|---|-----|--------|--------|--------|------------|-------|------|---|
| ANISOU | 803 | NH1 | ARG | A | 121 | 24142  | 28681  | 28730  | -6343      | -3525 | 3497 | N |
| ATOM   | 804 | NH2 | ARG | A | 121 | 7.779  | 15.129 | 26.520 | 1.00225.49 |       |      | N |
| ANISOU | 804 | NH2 | ARG | A | 121 | 25564  | 30245  | 29867  | -7071      | -3430 | 3610 | N |
| ATOM   | 805 | N   | LEU | A | 122 | 6.262  | 6.317  | 25.173 | 1.00185.80 |       |      | N |
| ANISOU | 805 | N   | LEU | A | 122 | 18092  | 24097  | 28405  | -3316      | -2159 | 4820 | N |
| ATOM   | 806 | CA  | LEU | A | 122 | 6.583  | 4.902  | 25.066 | 1.00184.13 |       |      | C |
| ANISOU | 806 | CA  | LEU | A | 122 | 17343  | 23774  | 28845  | -2834      | -1941 | 5246 | C |
| ATOM   | 807 | C   | LEU | A | 122 | 6.036  | 4.329  | 23.762 | 1.00185.34 |       |      | C |
| ANISOU | 807 | C   | LEU | A | 122 | 17892  | 23307  | 29224  | -2267      | -1410 | 4847 | C |
| ATOM   | 808 | O   | LEU | A | 122 | 6.689  | 3.516  | 23.108 | 1.00189.70 |       |      | O |
| ANISOU | 808 | O   | LEU | A | 122 | 18082  | 23659  | 30335  | -1876      | -1011 | 5112 | O |
| ATOM   | 809 | CB  | LEU | A | 122 | 6.018  | 4.136  | 26.262 | 1.00177.19 |       |      | C |
| ANISOU | 809 | CB  | LEU | A | 122 | 16286  | 23094  | 27945  | -2849      | -2317 | 5506 | C |
| ATOM   | 810 | CG  | LEU | A | 122 | 6.356  | 4.711  | 27.640 | 1.00167.39 |       |      | C |
| ANISOU | 810 | CG  | LEU | A | 122 | 14790  | 22443  | 26369  | -3458      | -2890 | 5843 | C |
| ATOM   | 811 | CD1 | LEU | A | 122 | 5.785  | 3.836  | 28.746 | 1.00177.60 |       |      | C |
| ANISOU | 811 | CD1 | LEU | A | 122 | 15941  | 23875  | 27662  | -3439      | -3209 | 6104 | C |
| ATOM   | 812 | CD2 | LEU | A | 122 | 7.858  | 4.884  | 27.805 | 1.00153.70 |       |      | C |
| ANISOU | 812 | CD2 | LEU | A | 122 | 12333  | 21114  | 24951  | -3695      | -2965 | 6441 | C |
| ATOM   | 813 | N   | GLN | A | 123 | 4.834  | 4.760  | 23.391 | 1.00184.57 |       |      | N |
| ANISOU | 813 | N   | GLN | A | 123 | 18543  | 22902  | 28683  | -2226      | -1406 | 4213 | N |
| ATOM   | 814 | CA  | GLN | A | 123 | 4.217  | 4.328  | 22.142 | 1.00191.51 |       |      | C |
| ANISOU | 814 | CA  | GLN | A | 123 | 19889  | 23194  | 29682  | -1757      | -959  | 3784 | C |
| ATOM   | 815 | C   | GLN | A | 123 | 4.993  | 4.855  | 20.941 | 1.00193.27 |       |      | C |
| ANISOU | 815 | C   | GLN | A | 123 | 20226  | 23191  | 30015  | -1709      | -540  | 3661 | C |
| ATOM   | 816 | O   | GLN | A | 123 | 5.089  | 4.188  | 19.911 | 1.00194.71 |       |      | O |
| ANISOU | 816 | O   | GLN | A | 123 | 20491  | 22948  | 30542  | -1293      | -66   | 3588 | O |
| ATOM   | 817 | CB  | GLN | A | 123 | 2.759  | 4.795  | 22.068 | 1.00196.43 |       |      | C |
| ANISOU | 817 | CB  | GLN | A | 123 | 21255  | 23603  | 29775  | -1769      | -1119 | 3144 | C |
| ATOM   | 818 | CG  | GLN | A | 123 | 1.776  | 3.932  | 22.850 | 1.00200.35 |       |      | C |
| ANISOU | 818 | CG  | GLN | A | 123 | 21732  | 24128  | 30263  | -1644      | -1333 | 3157 | C |
| ATOM   | 819 | CD  | GLN | A | 123 | 1.408  | 2.651  | 22.121 | 1.00202.36 |       |      | C |
| ANISOU | 819 | CD  | GLN | A | 123 | 22024  | 23935  | 30926  | -1127      | -963  | 3134 | C |
| ATOM   | 820 | OE1 | GLN | A | 123 | 1.414  | 2.599  | 20.891 | 1.00202.32 |       |      | O |
| ANISOU | 820 | OE1 | GLN | A | 123 | 22335  | 23503  | 31036  | -854       | -566  | 2865 | O |
| ATOM   | 821 | NE2 | GLN | A | 123 | 1.085  | 1.610  | 22.880 | 1.00200.64 |       |      | N |
| ANISOU | 821 | NE2 | GLN | A | 123 | 21530  | 23798  | 30905  | -1018      | -1086 | 3416 | N |
| ATOM   | 822 | N   | TYR | A | 124 | 5.548  | 6.055  | 21.080 | 1.00192.54 |       |      | N |
| ANISOU | 822 | N   | TYR | A | 124 | 20177  | 23374  | 29606  | -2165      | -701  | 3633 | N |
| ATOM   | 823 | CA  | TYR | A | 124 | 6.287  | 6.679  | 19.989 | 1.00193.94 |       |      | C |
| ANISOU | 823 | CA  | TYR | A | 124 | 20504  | 23365  | 29818  | -2207      | -320  | 3498 | C |
| ATOM   | 824 | C   | TYR | A | 124 | 7.599  | 7.285  | 20.474 | 1.00201.52 |       |      | C |
| ANISOU | 824 | C   | TYR | A | 124 | 20890  | 24826  | 30852  | -2659      | -444  | 3949 | C |
| ATOM   | 825 | O   | TYR | A | 124 | 7.634  | 8.437  | 20.909 | 1.00202.99 |       |      | O |
| ANISOU | 825 | O   | TYR | A | 124 | 21313  | 25268  | 30544  | -3166      | -758  | 3815 | O |
| ATOM   | 826 | CB  | TYR | A | 124 | 5.427  | 7.739  | 19.299 | 1.00185.22 |       |      | C |
| ANISOU | 826 | CB  | TYR | A | 124 | 20314  | 21935  | 28125  | -2310      | -322  | 2813 | C |
| ATOM   | 827 | CG  | TYR | A | 124 | 4.100  | 7.201  | 18.818 | 1.00176.72 |       |      | C |
| ANISOU | 827 | CG  | TYR | A | 124 | 19786  | 20406  | 26955  | -1900      | -247  | 2363 | C |
| ATOM   | 828 | CD1 | TYR | A | 124 | 4.032  | 6.342  | 17.730 | 1.00177.40 |       |      | C |
| ANISOU | 828 | CD1 | TYR | A | 124 | 19994  | 20016  | 27394  | -1437      | 229   | 2266 | C |
| ATOM   | 829 | CD2 | TYR | A | 124 | 2.916  | 7.546  | 19.457 | 1.00168.16 |       |      | C |
| ANISOU | 829 | CD2 | TYR | A | 124 | 19090  | 19376  | 25426  | -1991      | -642  | 2036 | C |
| ATOM   | 830 | CE1 | TYR | A | 124 | 2.822  | 5.842  | 17.289 | 1.00171.09 |       |      | C |
| ANISOU | 830 | CE1 | TYR | A | 124 | 19692  | 18822  | 26492  | -1110      | 272   | 1866 | C |
| ATOM   | 831 | CE2 | TYR | A | 124 | 1.700  | 7.051  | 19.022 | 1.00163.42 |       |      | C |
| ANISOU | 831 | CE2 | TYR | A | 124 | 18934  | 18404  | 24753  | -1638      | -589  | 1637 | C |
| ATOM   | 832 | CZ  | TYR | A | 124 | 1.660  | 6.200  | 17.937 | 1.00162.00 |       |      | C |
| ANISOU | 832 | CZ  | TYR | A | 124 | 18868  | 17770  | 24915  | -1215      | -150  | 1559 | C |
| ATOM   | 833 | OH  | TYR | A | 124 | 0.455  | 5.702  | 17.496 | 1.00153.26 |       |      | O |
| ANISOU | 833 | OH  | TYR | A | 124 | 18203  | 16309  | 23720  | -910       | -120  | 1170 | O |
| ATOM   | 834 | N   | PRO | A | 125 | 8.685  | 6.501  | 20.403 | 1.00206.01 |       |      | N |
| ANISOU | 834 | N   | PRO | A | 125 | 20696  | 25536  | 32044  | -2478      | -194  | 4492 | N |
| ATOM   | 835 | CA  | PRO | A | 125 | 10.018 | 6.945  | 20.815 | 1.00212.48 |       |      | C |
| ANISOU | 835 | CA  | PRO | A | 125 | 20838  | 26864  | 33030  | -2877      | -288  | 4983 | C |
| ATOM   | 836 | C   | PRO | A | 125 | 10.704 | 7.769  | 19.731 | 1.00210.55 |       |      | C |
| ANISOU | 836 | C   | PRO | A | 125 | 20804  | 26472  | 32722  | -3041      | 117   | 4767 | C |
| ATOM   | 837 | O   | PRO | A | 125 | 11.687 | 8.452  | 20.014 | 1.00212.48 |       |      | O |
| ANISOU | 837 | O   | PRO | A | 125 | 20654  | 27140  | 32939  | -3505      | 8     | 5045 | O |
| ATOM   | 838 | CB  | PRO | A | 125 | 10.766 | 5.628  | 21.013 | 1.00217.08 |       |      | C |

|        |     |     |     |   |     |        |        |        |            |       |      |   |
|--------|-----|-----|-----|---|-----|--------|--------|--------|------------|-------|------|---|
| ANISOU | 838 | CB  | PRO | A | 125 | 20553  | 27558  | 34369  | -2473      | -110  | 5608 | C |
| ATOM   | 839 | CG  | PRO | A | 125 | 10.138 | 4.709  | 20.026 | 1.00212.62 |       |      | C |
| ANISOU | 839 | CG  | PRO | A | 125 | 20357  | 26362  | 34068  | -1842      | 385   | 5317 | C |
| ATOM   | 840 | CD  | PRO | A | 125 | 8.680  | 5.088  | 19.983 | 1.00204.55 |       |      | C |
| ANISOU | 840 | CD  | PRO | A | 125 | 20226  | 25039  | 32457  | -1867      | 181   | 4692 | C |
| ATOM   | 841 | N   | GLU | A | 126 | 10.183 | 7.714  | 18.509 | 1.00206.64 |       |      | N |
| ANISOU | 841 | N   | GLU | A | 126 | 20947  | 25388  | 32178  | -2702      | 570   | 4277 | N |
| ATOM   | 842 | CA  | GLU | A | 126 | 10.807 | 8.404  | 17.382 | 1.00208.91 |       |      | C |
| ANISOU | 842 | CA  | GLU | A | 126 | 21496  | 25467  | 32412  | -2826      | 1017  | 4056 | C |
| ATOM   | 843 | C   | GLU | A | 126 | 10.597 | 9.917  | 17.421 | 1.00210.83 |       |      | C |
| ANISOU | 843 | C   | GLU | A | 126 | 22376  | 25790  | 31940  | -3402      | 742   | 3672 | C |
| ATOM   | 844 | O   | GLU | A | 126 | 10.977 | 10.626 | 16.488 | 1.00212.91 |       |      | O |
| ANISOU | 844 | O   | GLU | A | 126 | 23016  | 25842  | 32038  | -3562      | 1071  | 3418 | O |
| ATOM   | 845 | CB  | GLU | A | 126 | 10.303 | 7.838  | 16.050 | 1.00202.69 |       |      | C |
| ANISOU | 845 | CB  | GLU | A | 126 | 21251  | 23995  | 31766  | -2299      | 1582  | 3658 | C |
| ATOM   | 846 | CG  | GLU | A | 126 | 8.821  | 8.064  | 15.786 | 1.00188.89 |       |      | C |
| ANISOU | 846 | CG  | GLU | A | 126 | 20436  | 21825  | 29507  | -2164      | 1406  | 3047 | C |
| ATOM   | 847 | CD  | GLU | A | 126 | 7.948  | 6.972  | 16.371 | 1.00177.68 |       |      | C |
| ANISOU | 847 | CD  | GLU | A | 126 | 18900  | 20339  | 28270  | -1781      | 1212  | 3123 | C |
| ATOM   | 848 | OE1 | GLU | A | 126 | 6.710  | 7.135  | 16.366 | 1.00168.18 |       |      | O |
| ANISOU | 848 | OE1 | GLU | A | 126 | 18337  | 18898  | 26663  | -1707      | 989   | 2675 | O |
| ATOM   | 849 | OE2 | GLU | A | 126 | 8.497  | 5.949  | 16.830 | 1.00177.05 |       |      | O |
| ANISOU | 849 | OE2 | GLU | A | 126 | 18088  | 20441  | 28741  | -1551      | 1286  | 3634 | O |
| ATOM   | 850 | N   | LEU | A | 127 | 9.996  | 10.408 | 18.499 | 1.00210.44 |       |      | N |
| ANISOU | 850 | N   | LEU | A | 127 | 22480  | 26024  | 31455  | -3717      | 160   | 3628 | N |
| ATOM   | 851 | CA  | LEU | A | 127 | 9.732  | 11.833 | 18.639 | 1.00212.29 |       |      | C |
| ANISOU | 851 | CA  | LEU | A | 127 | 23363  | 26312  | 30986  | -4248      | -121  | 3264 | C |
| ATOM   | 852 | C   | LEU | A | 127 | 10.461 | 12.424 | 19.843 | 1.00220.82 |       |      | C |
| ANISOU | 852 | C   | LEU | A | 127 | 23952  | 28043  | 31905  | -4877      | -581  | 3678 | C |
| ATOM   | 853 | O   | LEU | A | 127 | 10.435 | 13.636 | 20.058 | 1.00219.77 |       |      | O |
| ANISOU | 853 | O   | LEU | A | 127 | 24294  | 28011  | 31198  | -5400      | -815  | 3452 | O |
| ATOM   | 854 | CB  | LEU | A | 127 | 8.227  | 12.087 | 18.767 | 1.00201.19 |       |      | C |
| ANISOU | 854 | CB  | LEU | A | 127 | 22765  | 24593  | 29087  | -4091      | -383  | 2726 | C |
| ATOM   | 855 | CG  | LEU | A | 127 | 7.320  | 11.437 | 17.719 | 1.00190.69 |       |      | C |
| ANISOU | 855 | CG  | LEU | A | 127 | 21931  | 22651  | 27873  | -3486      | -40   | 2317 | C |
| ATOM   | 856 | CD1 | LEU | A | 127 | 5.862  | 11.786 | 17.979 | 1.00178.02 |       |      | C |
| ANISOU | 856 | CD1 | LEU | A | 127 | 21030  | 20839  | 25769  | -3394      | -369  | 1821 | C |
| ATOM   | 857 | CD2 | LEU | A | 127 | 7.729  | 11.846 | 16.313 | 1.00192.47 |       |      | C |
| ANISOU | 857 | CD2 | LEU | A | 127 | 22589  | 22462  | 28081  | -3432      | 459   | 2046 | C |
| ATOM   | 858 | N   | PHE | A | 128 | 11.115 | 11.567 | 20.624 | 1.00227.49 |       |      | N |
| ANISOU | 858 | N   | PHE | A | 128 | 23877  | 29317  | 33243  | -4835      | -719  | 4293 | N |
| ATOM   | 859 | CA  | PHE | A | 128 | 11.735 | 12.006 | 21.872 | 1.00231.23 |       |      | C |
| ANISOU | 859 | CA  | PHE | A | 128 | 23861  | 30433  | 33563  | -5433      | -1228 | 4728 | C |
| ATOM   | 860 | C   | PHE | A | 128 | 13.130 | 11.427 | 22.115 | 1.00230.89 |       |      | C |
| ANISOU | 860 | C   | PHE | A | 128 | 22720  | 30860  | 34146  | -5503      | -1158 | 5442 | C |
| ATOM   | 861 | O   | PHE | A | 128 | 13.812 | 11.829 | 23.058 | 1.00234.33 |       |      | O |
| ANISOU | 861 | O   | PHE | A | 128 | 22690  | 31865  | 34479  | -6053      | -1571 | 5849 | O |
| ATOM   | 862 | CB  | PHE | A | 128 | 10.825 | 11.676 | 23.059 | 1.00229.62 |       |      | C |
| ANISOU | 862 | CB  | PHE | A | 128 | 23725  | 30382  | 33139  | -5427      | -1733 | 4764 | C |
| ATOM   | 863 | CG  | PHE | A | 128 | 9.457  | 12.291 | 22.965 | 1.00221.58 |       |      | C |
| ANISOU | 863 | CG  | PHE | A | 128 | 23700  | 28982  | 31509  | -5385      | -1845 | 4094 | C |
| ATOM   | 864 | CD1 | PHE | A | 128 | 9.230  | 13.580 | 23.421 | 1.00220.60 |       |      | C |
| ANISOU | 864 | CD1 | PHE | A | 128 | 24140  | 28979  | 30698  | -5953      | -2161 | 3820 | C |
| ATOM   | 865 | CD2 | PHE | A | 128 | 8.397  | 11.581 | 22.422 | 1.00212.63 |       |      | C |
| ANISOU | 865 | CD2 | PHE | A | 128 | 22933  | 27368  | 30488  | -4779      | -1634 | 3745 | C |
| ATOM   | 866 | CE1 | PHE | A | 128 | 7.973  | 14.150 | 23.337 | 1.00213.22 |       |      | C |
| ANISOU | 866 | CE1 | PHE | A | 128 | 24090  | 27691  | 29232  | -5865      | -2252 | 3214 | C |
| ATOM   | 867 | CE2 | PHE | A | 128 | 7.138  | 12.146 | 22.335 | 1.00205.41 |       |      | C |
| ANISOU | 867 | CE2 | PHE | A | 128 | 22867  | 26136  | 29043  | -4722      | -1752 | 3147 | C |
| ATOM   | 868 | CZ  | PHE | A | 128 | 6.925  | 13.431 | 22.794 | 1.00206.63 |       |      | C |
| ANISOU | 868 | CZ  | PHE | A | 128 | 23548  | 26415  | 28548  | -5240      | -2056 | 2884 | C |
| ATOM   | 869 | N   | ASP | A | 129 | 13.550 | 10.485 | 21.275 | 1.00222.75 |       |      | N |
| ANISOU | 869 | N   | ASP | A | 129 | 21281  | 29592  | 33761  | -4949      | -638  | 5598 | N |
| ATOM   | 870 | CA  | ASP | A | 129 | 14.860 | 9.854  | 21.431 | 1.00218.17 |       |      | C |
| ANISOU | 870 | CA  | ASP | A | 129 | 19615  | 29426  | 33856  | -4908      | -513  | 6279 | C |
| ATOM   | 871 | C   | ASP | A | 129 | 16.003 | 10.819 | 21.139 | 1.00225.03 |       |      | C |
| ANISOU | 871 | C   | ASP | A | 129 | 20227  | 30626  | 34649  | -5483      | -405  | 6402 | C |
| ATOM   | 872 | O   | ASP | A | 129 | 16.387 | 11.617 | 21.994 | 1.00226.78 |       |      | O |
| ANISOU | 872 | O   | ASP | A | 129 | 20307  | 31347  | 34511  | -6155      | -884  | 6594 | O |
| ATOM   | 873 | CB  | ASP | A | 129 | 14.977 | 8.616  | 20.541 | 1.00212.67 |       |      | C |

|        |     |     |     |   |     |        |        |        |            |       |      |   |
|--------|-----|-----|-----|---|-----|--------|--------|--------|------------|-------|------|---|
| ANISOU | 873 | CB  | ASP | A | 129 | 18624  | 28323  | 33857  | -4133      | 87    | 6366 | C |
| ATOM   | 874 | CG  | ASP | A | 129 | 14.376 | 7.383  | 21.181 | 1.00214.25 |       |      | C |
| ANISOU | 874 | CG  | ASP | A | 129 | 18583  | 28453  | 34370  | -3636      | -97   | 6606 | C |
| ATOM   | 875 | OD1 | ASP | A | 129 | 13.467 | 7.532  | 22.024 | 1.00208.75 |       |      | O |
| ANISOU | 875 | OD1 | ASP | A | 129 | 18265  | 27817  | 33233  | -3799      | -589  | 6460 | O |
| ATOM   | 876 | OD2 | ASP | A | 129 | 14.815 | 6.263  | 20.843 | 1.00222.40 |       |      | O |
| ANISOU | 876 | OD2 | ASP | A | 129 | 19063  | 29356  | 36082  | -3086      | 271   | 6939 | O |
| ATOM   | 877 | N   | SER | A | 130 | 16.547 | 10.740 | 19.930 | 1.00235.39 |       |      | N |
| ANISOU | 877 | N   | SER | A | 130 | 21500  | 31655  | 36283  | -5247      | 240   | 6288 | N |
| ATOM   | 878 | CA  | SER | A | 130 | 17.626 | 11.633 | 19.520 | 1.00250.45 |       |      | C |
| ANISOU | 878 | CA  | SER | A | 130 | 23193  | 33836  | 38131  | -5785      | 431   | 6366 | C |
| ATOM   | 879 | C   | SER | A | 130 | 17.069 | 12.997 | 19.128 | 1.00252.80 |       |      | C |
| ANISOU | 879 | C   | SER | A | 130 | 24578  | 33870  | 37604  | -6275      | 372   | 5733 | C |
| ATOM   | 880 | O   | SER | A | 130 | 17.319 | 13.489 | 18.028 | 1.00252.59 |       |      | O |
| ANISOU | 880 | O   | SER | A | 130 | 24957  | 33528  | 37488  | -6325      | 862   | 5409 | O |
| ATOM   | 881 | CB  | SER | A | 130 | 18.412 | 11.029 | 18.356 | 1.00257.07 |       |      | C |
| ANISOU | 881 | CB  | SER | A | 130 | 23607  | 34451  | 39617  | -5350      | 1197  | 6465 | C |
| ATOM   | 882 | OG  | SER | A | 130 | 17.578 | 10.824 | 17.229 | 1.00255.74 |       |      | O |
| ANISOU | 882 | OG  | SER | A | 130 | 24292  | 33534  | 39343  | -4867      | 1684  | 5882 | O |
| ATOM   | 883 | N   | LEU | A | 131 | 16.314 | 13.601 | 20.039 | 1.00253.73 |       |      | N |
| ANISOU | 883 | N   | LEU | A | 131 | 25188  | 34102  | 37115  | -6630      | -220  | 5563 | N |
| ATOM   | 884 | CA  | LEU | A | 131 | 15.652 | 14.871 | 19.775 | 1.00248.99 |       |      | C |
| ANISOU | 884 | CA  | LEU | A | 131 | 25679  | 33215  | 35712  | -7033      | -325  | 4957 | C |
| ATOM   | 885 | C   | LEU | A | 131 | 16.626 | 16.037 | 19.903 | 1.00244.54 |       |      | C |
| ANISOU | 885 | C   | LEU | A | 131 | 25047  | 33050  | 34819  | -7864      | -429  | 5073 | C |
| ATOM   | 886 | O   | LEU | A | 131 | 16.799 | 16.600 | 20.985 | 1.00241.29 |       |      | O |
| ANISOU | 886 | O   | LEU | A | 131 | 24516  | 33105  | 34058  | -8457      | -973  | 5285 | O |
| ATOM   | 887 | CB  | LEU | A | 131 | 14.468 | 15.057 | 20.728 | 1.00245.29 |       |      | C |
| ANISOU | 887 | CB  | LEU | A | 131 | 25751  | 32711  | 34736  | -7074      | -880  | 4730 | C |
| ATOM   | 888 | CG  | LEU | A | 131 | 13.490 | 16.188 | 20.409 | 1.00241.05 |       |      | C |
| ANISOU | 888 | CG  | LEU | A | 131 | 26429  | 31745  | 33414  | -7268      | -961  | 4038 | C |
| ATOM   | 889 | CD1 | LEU | A | 131 | 12.888 | 16.003 | 19.024 | 1.00235.32 |       |      | C |
| ANISOU | 889 | CD1 | LEU | A | 131 | 26345  | 30324  | 32744  | -6709      | -434  | 3533 | C |
| ATOM   | 890 | CD2 | LEU | A | 131 | 12.397 | 16.256 | 21.464 | 1.00236.43 |       |      | C |
| ANISOU | 890 | CD2 | LEU | A | 131 | 26213  | 31200  | 32421  | -7281      | -1486 | 3886 | C |
| ATOM   | 891 | N   | SER | A | 132 | 17.263 | 16.388 | 18.790 | 1.00241.74 |       |      | N |
| ANISOU | 891 | N   | SER | A | 132 | 24793  | 32502  | 34557  | -7935      | 108   | 4929 | N |
| ATOM   | 892 | CA  | SER | A | 132 | 18.197 | 17.508 | 18.756 | 1.00240.82 |       |      | C |
| ANISOU | 892 | CA  | SER | A | 132 | 24669  | 32713  | 34119  | -8742      | 90    | 4996 | C |
| ATOM   | 893 | C   | SER | A | 132 | 17.458 | 18.815 | 18.497 | 1.00234.02 |       |      | C |
| ANISOU | 893 | C   | SER | A | 132 | 25084  | 31460  | 32375  | -9138      | -31   | 4364 | C |
| ATOM   | 894 | O   | SER | A | 132 | 16.860 | 18.993 | 17.436 | 1.00229.20 |       |      | O |
| ANISOU | 894 | O   | SER | A | 132 | 25281  | 30219  | 31585  | -8810      | 353   | 3846 | O |
| ATOM   | 895 | CB  | SER | A | 132 | 19.261 | 17.286 | 17.679 | 1.00240.33 |       |      | C |
| ANISOU | 895 | CB  | SER | A | 132 | 24113  | 32635  | 34566  | -8664      | 762   | 5140 | C |
| ATOM   | 896 | OG  | SER | A | 132 | 20.140 | 18.394 | 17.593 | 1.00239.10 |       |      | O |
| ANISOU | 896 | OG  | SER | A | 132 | 23990  | 32783  | 34073  | -9483      | 772   | 5173 | O |
| ATOM   | 897 | N   | PRO | A | 133 | 17.502 | 19.739 | 19.470 | 1.00231.94 |       |      | N |
| ANISOU | 897 | N   | PRO | A | 133 | 25029  | 31552  | 31544  | -9852      | -571  | 4412 | N |
| ATOM   | 898 | CA  | PRO | A | 133 | 16.828 | 21.040 | 19.379 | 1.00222.11 |       |      | C |
| ANISOU | 898 | CA  | PRO | A | 133 | 25002  | 29960  | 29429  | -10266     | -735  | 3848 | C |
| ATOM   | 899 | C   | PRO | A | 133 | 17.361 | 21.907 | 18.238 | 1.00213.60 |       |      | C |
| ANISOU | 899 | C   | PRO | A | 133 | 24454  | 28599  | 28105  | -10599     | -275  | 3557 | C |
| ATOM   | 900 | O   | PRO | A | 133 | 16.754 | 22.925 | 17.907 | 1.00198.64 |       |      | O |
| ANISOU | 900 | O   | PRO | A | 133 | 23671  | 26277  | 25527  | -10815     | -309  | 3038 | O |
| ATOM   | 901 | CB  | PRO | A | 133 | 17.149 | 21.694 | 20.728 | 1.00227.85 |       |      | C |
| ANISOU | 901 | CB  | PRO | A | 133 | 25558  | 31269  | 29745  | -11044     | -1357 | 4136 | C |
| ATOM   | 902 | CG  | PRO | A | 133 | 17.466 | 20.555 | 21.641 | 1.00231.95 |       |      | C |
| ANISOU | 902 | CG  | PRO | A | 133 | 24952  | 32311  | 30867  | -10818     | -1628 | 4748 | C |
| ATOM   | 903 | CD  | PRO | A | 133 | 18.155 | 19.549 | 20.776 | 1.00236.85 |       |      | C |
| ANISOU | 903 | CD  | PRO | A | 133 | 24760  | 32919  | 32314  | -10288     | -1087 | 5024 | C |
| ATOM   | 904 | N   | GLU | A | 134 | 18.481 | 21.501 | 17.647 | 1.00224.57 |       |      | N |
| ANISOU | 904 | N   | GLU | A | 134 | 25064  | 30215  | 30047  | -10632     | 164   | 3890 | N |
| ATOM   | 905 | CA  | GLU | A | 134 | 19.096 | 22.253 | 16.559 | 1.00237.08 |       |      | C |
| ANISOU | 905 | CA  | GLU | A | 134 | 27063  | 31573  | 31442  | -10985     | 653   | 3657 | C |
| ATOM   | 906 | C   | GLU | A | 134 | 18.378 | 22.014 | 15.231 | 1.00231.44 |       |      | C |
| ANISOU | 906 | C   | GLU | A | 134 | 27121  | 30072  | 30744  | -10331     | 1181  | 3138 | C |
| ATOM   | 907 | O   | GLU | A | 134 | 18.258 | 22.922 | 14.408 | 1.00231.80 |       |      | O |
| ANISOU | 907 | O   | GLU | A | 134 | 28103  | 29685  | 30284  | -10585     | 1416  | 2698 | O |
| ATOM   | 908 | CB  | GLU | A | 134 | 20.580 | 21.890 | 16.439 | 1.00251.19 |       |      | C |

|        |     |     |     |   |     |        |        |        |            |      |      |   |
|--------|-----|-----|-----|---|-----|--------|--------|--------|------------|------|------|---|
| ANISOU | 908 | CB  | GLU | A | 134 | 27668  | 33931  | 33842  | -11269     | 955  | 4217 | C |
| ATOM   | 909 | CG  | GLU | A | 134 | 21.359 | 22.739 | 15.443 | 1.00258.46 |      |      | C |
| ANISOU | 909 | CG  | GLU | A | 134 | 28927  | 34730  | 34544  | -11788     | 1445 | 4031 | C |
| ATOM   | 910 | CD  | GLU | A | 134 | 22.847 | 22.438 | 15.458 | 1.00266.24 |      |      | C |
| ANISOU | 910 | CD  | GLU | A | 134 | 28654  | 36376  | 36129  | -12137     | 1700 | 4613 | C |
| ATOM   | 911 | OE1 | GLU | A | 134 | 23.275 | 21.580 | 16.258 | 1.00271.70 |      |      | O |
| ANISOU | 911 | OE1 | GLU | A | 134 | 28208  | 37617  | 37410  | -11955     | 1460 | 5179 | O |
| ATOM   | 912 | OE2 | GLU | A | 134 | 23.589 | 23.063 | 14.670 | 1.00265.76 |      |      | O |
| ANISOU | 912 | OE2 | GLU | A | 134 | 28735  | 36288  | 35953  | -12595     | 2139 | 4512 | O |
| ATOM   | 913 | N   | ALA | A | 135 | 17.896 | 20.791 | 15.030 | 1.00223.79 |      |      | N |
| ANISOU | 913 | N   | ALA | A | 135 | 25792  | 28908  | 30332  | -9512      | 1351 | 3196 | N |
| ATOM   | 914 | CA  | ALA | A | 135 | 17.221 | 20.430 | 13.787 | 1.00215.17 |      |      | C |
| ANISOU | 914 | CA  | ALA | A | 135 | 25369  | 27089  | 29296  | -8878      | 1840 | 2743 | C |
| ATOM   | 915 | C   | ALA | A | 135 | 15.723 | 20.709 | 13.850 | 1.00208.93 |      |      | C |
| ANISOU | 915 | C   | ALA | A | 135 | 25626  | 25785  | 27973  | -8554      | 1511 | 2219 | C |
| ATOM   | 916 | O   | ALA | A | 135 | 15.056 | 20.801 | 12.818 | 1.00199.80 |      |      | O |
| ANISOU | 916 | O   | ALA | A | 135 | 25305  | 23989  | 26620  | -8202      | 1805 | 1746 | O |
| ATOM   | 917 | CB  | ALA | A | 135 | 17.475 | 18.967 | 13.453 | 1.00214.13 |      |      | C |
| ANISOU | 917 | CB  | ALA | A | 135 | 24379  | 26961  | 30021  | -8173      | 2242 | 3050 | C |
| ATOM   | 918 | N   | VAL | A | 136 | 15.201 | 20.841 | 15.066 | 1.00214.35 |      |      | N |
| ANISOU | 918 | N   | VAL | A | 136 | 26253  | 26763  | 28426  | -8683      | 902  | 2311 | N |
| ATOM   | 919 | CA  | VAL | A | 136 | 13.778 | 21.093 | 15.275 | 1.00208.56 |      |      | C |
| ANISOU | 919 | CA  | VAL | A | 136 | 26401  | 25623  | 27220  | -8381      | 564  | 1849 | C |
| ATOM   | 920 | C   | VAL | A | 136 | 13.393 | 22.507 | 14.850 | 1.00207.50 |      |      | C |
| ANISOU | 920 | C   | VAL | A | 136 | 27466  | 25095  | 26279  | -8785      | 498  | 1336 | C |
| ATOM   | 921 | O   | VAL | A | 136 | 12.361 | 22.714 | 14.208 | 1.00194.85 |      |      | O |
| ANISOU | 921 | O   | VAL | A | 136 | 26762  | 22901  | 24371  | -8391      | 542  | 835  | O |
| ATOM   | 922 | CB  | VAL | A | 136 | 13.382 | 20.877 | 16.751 | 1.00205.50 |      |      | C |
| ANISOU | 922 | CB  | VAL | A | 136 | 25611  | 25683  | 26788  | -8463      | -41  | 2101 | C |
| ATOM   | 923 | CG1 | VAL | A | 136 | 11.925 | 21.253 | 16.978 | 1.00198.51 |      |      | C |
| ANISOU | 923 | CG1 | VAL | A | 136 | 25647  | 24395  | 25382  | -8197      | -361 | 1597 | C |
| ATOM   | 924 | CG2 | VAL | A | 136 | 13.635 | 19.435 | 17.161 | 1.00205.25 |      |      | C |
| ANISOU | 924 | CG2 | VAL | A | 136 | 24489  | 25966  | 27530  | -7998      | -2   | 2590 | C |
| ATOM   | 925 | N   | ARG | A | 137 | 14.233 | 23.475 | 15.207 | 1.00218.12 |      |      | N |
| ANISOU | 925 | N   | ARG | A | 137 | 28826  | 26770  | 27280  | -9577      | 381  | 1476 | N |
| ATOM   | 926 | CA  | ARG | A | 137 | 13.991 | 24.873 | 14.864 | 1.00221.22 |      |      | C |
| ANISOU | 926 | CA  | ARG | A | 137 | 30364  | 26805  | 26885  | -10038     | 319  | 1032 | C |
| ATOM   | 927 | C   | ARG | A | 137 | 13.926 | 25.071 | 13.354 | 1.00231.85 |      |      | C |
| ANISOU | 927 | C   | ARG | A | 137 | 32417  | 27524  | 28152  | -9807      | 847  | 649  | C |
| ATOM   | 928 | O   | ARG | A | 137 | 13.189 | 25.926 | 12.863 | 1.00238.15 |      |      | O |
| ANISOU | 928 | O   | ARG | A | 137 | 34352  | 27783  | 28352  | -9799      | 796  | 153  | O |
| ATOM   | 929 | CB  | ARG | A | 137 | 15.082 | 25.763 | 15.456 | 1.00217.43 |      |      | C |
| ANISOU | 929 | CB  | ARG | A | 137 | 29669  | 26828  | 26116  | -10987     | 164  | 1312 | C |
| ATOM   | 930 | CG  | ARG | A | 137 | 14.813 | 27.251 | 15.319 | 1.00212.19 |      |      | C |
| ANISOU | 930 | CG  | ARG | A | 137 | 30224  | 25821  | 24577  | -11529     | 26   | 881  | C |
| ATOM   | 931 | CD  | ARG | A | 137 | 15.927 | 28.062 | 15.953 | 1.00215.87 |      |      | C |
| ANISOU | 931 | CD  | ARG | A | 137 | 30432  | 26820  | 24768  | -12520     | -134 | 1190 | C |
| ATOM   | 932 | NE  | ARG | A | 137 | 15.647 | 29.494 | 15.939 | 1.00211.04 |      |      | N |
| ANISOU | 932 | NE  | ARG | A | 137 | 31034  | 25872  | 23281  | -13068     | -296 | 788  | N |
| ATOM   | 933 | CZ  | ARG | A | 137 | 16.406 | 30.405 | 16.537 | 1.00208.56 |      |      | C |
| ANISOU | 933 | CZ  | ARG | A | 137 | 30788  | 25919  | 22536  | -13992     | -500 | 951  | C |
| ATOM   | 934 | NH1 | ARG | A | 137 | 17.492 | 30.031 | 17.200 | 1.00211.45 |      |      | N |
| ANISOU | 934 | NH1 | ARG | A | 137 | 30029  | 27032  | 23280  | -14476     | -596 | 1520 | N |
| ATOM   | 935 | NH2 | ARG | A | 137 | 16.081 | 31.688 | 16.475 | 1.00206.94 |      |      | N |
| ANISOU | 935 | NH2 | ARG | A | 137 | 31785  | 25323  | 21518  | -14437     | -619 | 553  | N |
| ATOM   | 936 | N   | CYS | A | 138 | 14.700 | 24.274 | 12.625 | 1.00230.08 |      |      | N |
| ANISOU | 936 | N   | CYS | A | 138 | 31529  | 27361  | 28531  | -9613      | 1360 | 887  | N |
| ATOM   | 937 | CA  | CYS | A | 138 | 14.718 | 24.336 | 11.169 | 1.00219.52 |      |      | C |
| ANISOU | 937 | CA  | CYS | A | 138 | 30799  | 25443  | 27165  | -9400      | 1918 | 560  | C |
| ATOM   | 938 | C   | CYS | A | 138 | 13.359 | 23.954 | 10.592 | 1.00202.01 |      |      | C |
| ANISOU | 938 | C   | CYS | A | 138 | 29315  | 22587  | 24854  | -8647      | 1898 | 114  | C |
| ATOM   | 939 | O   | CYS | A | 138 | 12.971 | 24.427 | 9.524  | 1.00192.53 |      |      | O |
| ANISOU | 939 | O   | CYS | A | 138 | 29067  | 20786  | 23300  | -8546      | 2137 | -312 | O |
| ATOM   | 940 | CB  | CYS | A | 138 | 15.804 | 23.417 | 10.610 | 1.00224.54 |      |      | C |
| ANISOU | 940 | CB  | CYS | A | 138 | 30472  | 26308  | 28536  | -9286      | 2495 | 936  | C |
| ATOM   | 941 | SG  | CYS | A | 138 | 17.458 | 23.750 | 11.262 | 1.00291.43 |      |      | S |
| ANISOU | 941 | SG  | CYS | A | 138 | 37897  | 35606  | 37225  | -10139     | 2529 | 1518 | S |
| ATOM   | 942 | N   | THR | A | 139 | 12.640 | 23.097 | 11.309 | 1.00198.32 |      |      | N |
| ANISOU | 942 | N   | THR | A | 139 | 28399  | 22261  | 24691  | -8145      | 1597 | 224  | N |
| ATOM   | 943 | CA  | THR | A | 139 | 11.300 | 22.693 | 10.906 | 1.00195.03 |      |      | C |

|        |     |     |     |   |     |        |        |        |            |       |       |   |
|--------|-----|-----|-----|---|-----|--------|--------|--------|------------|-------|-------|---|
| ANISOU | 943 | CA  | THR | A | 139 | 28582  | 21320  | 24201  | -7457      | 1512  | -170  | C |
| ATOM   | 944 | C   | THR | A | 139 | 10.290 | 23.774 | 11.282 | 1.00186.06 |       |       | C |
| ANISOU | 944 | C   | THR | A | 139 | 28430  | 19934  | 22330  | -7575      | 1031  | -585  | C |
| ATOM   | 945 | O   | THR | A | 139 | 9.337  | 24.032 | 10.546 | 1.00179.73 |       |       | O |
| ANISOU | 945 | O   | THR | A | 139 | 28522  | 18552  | 21215  | -7214      | 1031  | -1043 | O |
| ATOM   | 946 | CB  | THR | A | 139 | 10.895 | 21.358 | 11.563 | 1.00198.14 |       |       | C |
| ANISOU | 946 | CB  | THR | A | 139 | 28129  | 21965  | 25188  | -6903      | 1379  | 105   | C |
| ATOM   | 947 | OG1 | THR | A | 139 | 11.898 | 20.370 | 11.297 | 1.00208.53 |       |       | O |
| ANISOU | 947 | OG1 | THR | A | 139 | 28496  | 23530  | 27207  | -6789      | 1821  | 530   | O |
| ATOM   | 948 | CG2 | THR | A | 139 | 9.560  | 20.873 | 11.019 | 1.00189.53 |       |       | C |
| ANISOU | 948 | CG2 | THR | A | 139 | 27625  | 20333  | 24056  | -6215      | 1349  | -301  | C |
| ATOM   | 949 | N   | ILE | A | 140 | 10.510 | 24.409 | 12.429 | 1.00187.88 |       |       | N |
| ANISOU | 949 | N   | ILE | A | 140 | 28500  | 20601  | 22285  | -8082      | 622   | -418  | N |
| ATOM   | 950 | CA  | ILE | A | 140 | 9.626  | 25.469 | 12.898 | 1.00194.22 |       |       | C |
| ANISOU | 950 | CA  | ILE | A | 140 | 30208  | 21195  | 22391  | -8225      | 187   | -787  | C |
| ATOM   | 951 | C   | ILE | A | 140 | 9.762  | 26.719 | 12.032 | 1.00209.89 |       |       | C |
| ANISOU | 951 | C   | ILE | A | 140 | 33277  | 22712  | 23759  | -8591      | 339   | -1149 | C |
| ATOM   | 952 | O   | ILE | A | 140 | 8.765  | 27.350 | 11.679 | 1.00209.54 |       |       | O |
| ANISOU | 952 | O   | ILE | A | 140 | 34228  | 22152  | 23237  | -8350      | 180   | -1608 | O |
| ATOM   | 953 | CB  | ILE | A | 140 | 9.909  | 25.834 | 14.367 | 1.00198.03 |       |       | C |
| ANISOU | 953 | CB  | ILE | A | 140 | 30270  | 22264  | 22710  | -8742      | -258  | -500  | C |
| ATOM   | 954 | CG1 | ILE | A | 140 | 9.880  | 24.579 | 15.243 | 1.00199.75 |       |       | C |
| ANISOU | 954 | CG1 | ILE | A | 140 | 29394  | 22963  | 23538  | -8429      | -409  | -89   | C |
| ATOM   | 955 | CG2 | ILE | A | 140 | 8.903  | 26.860 | 14.866 | 1.00196.19 |       |       | C |
| ANISOU | 955 | CG2 | ILE | A | 140 | 30996  | 21771  | 21777  | -8810      | -665  | -908  | C |
| ATOM   | 956 | CD1 | ILE | A | 140 | 10.187 | 24.843 | 16.699 | 1.00205.73 |       |       | C |
| ANISOU | 956 | CD1 | ILE | A | 140 | 29705  | 24315  | 24149  | -8950      | -855  | 231   | C |
| ATOM   | 957 | N   | GLU | A | 141 | 11.000 | 27.065 | 11.690 | 1.00223.00 |       |       | N |
| ANISOU | 957 | N   | GLU | A | 141 | 34732  | 24557  | 25439  | -9173      | 648   | -933  | N |
| ATOM   | 958 | CA  | GLU | A | 141 | 11.270 | 28.214 | 10.831 | 1.00223.39 |       |       | C |
| ANISOU | 958 | CA  | GLU | A | 141 | 35784  | 24178  | 24916  | -9592      | 845   | -1238 | C |
| ATOM   | 959 | C   | GLU | A | 141 | 10.677 | 28.012 | 9.444  | 1.00215.22 |       |       | C |
| ANISOU | 959 | C   | GLU | A | 141 | 35458  | 22450  | 23864  | -9050      | 1174  | -1618 | C |
| ATOM   | 960 | O   | GLU | A | 141 | 10.396 | 28.976 | 8.731  | 1.00209.81 |       |       | O |
| ANISOU | 960 | O   | GLU | A | 141 | 35877  | 21240  | 22602  | -9190      | 1210  | -1996 | O |
| ATOM   | 961 | CB  | GLU | A | 141 | 12.773 | 28.475 | 10.725 | 1.00229.89 |       |       | C |
| ANISOU | 961 | CB  | GLU | A | 141 | 36101  | 25397  | 25848  | -10329     | 1162  | -893  | C |
| ATOM   | 962 | CG  | GLU | A | 141 | 13.394 | 29.045 | 11.987 | 1.00234.77 |       |       | C |
| ANISOU | 962 | CG  | GLU | A | 141 | 36314  | 26624  | 26262  | -11055     | 794   | -584  | C |
| ATOM   | 963 | CD  | GLU | A | 141 | 14.877 | 29.309 | 11.836 | 1.00243.54 |       |       | C |
| ANISOU | 963 | CD  | GLU | A | 141 | 36895  | 28152  | 27489  | -11805     | 1100  | -240  | C |
| ATOM   | 964 | OE1 | GLU | A | 141 | 15.440 | 28.944 | 10.783 | 1.00246.54 |       |       | O |
| ANISOU | 964 | OE1 | GLU | A | 141 | 37120  | 28374  | 28180  | -11708     | 1640  | -221  | O |
| ATOM   | 965 | OE2 | GLU | A | 141 | 15.478 | 29.881 | 12.770 | 1.00247.30 |       |       | O |
| ANISOU | 965 | OE2 | GLU | A | 141 | 37110  | 29117  | 27736  | -12511     | 810   | 8     | O |
| ATOM   | 966 | N   | ALA | A | 142 | 10.486 | 26.752 | 9.068  | 1.00213.29 |       |       | N |
| ANISOU | 966 | N   | ALA | A | 142 | 34610  | 22193  | 24238  | -8443      | 1404  | -1509 | N |
| ATOM   | 967 | CA  | ALA | A | 142 | 9.841  | 26.415 | 7.807  | 1.00208.23 |       |       | C |
| ANISOU | 967 | CA  | ALA | A | 142 | 34598  | 20912  | 23607  | -7896      | 1682  | -1854 | C |
| ATOM   | 968 | C   | ALA | A | 142 | 8.336  | 26.640 | 7.909  | 1.00207.72 |       |       | C |
| ANISOU | 968 | C   | ALA | A | 142 | 35282  | 20449  | 23193  | -7388      | 1244  | -2258 | C |
| ATOM   | 969 | O   | ALA | A | 142 | 7.614  | 26.545 | 6.917  | 1.00207.63 |       |       | O |
| ANISOU | 969 | O   | ALA | A | 142 | 35956  | 19870  | 23062  | -6954      | 1348  | -2596 | O |
| ATOM   | 970 | CB  | ALA | A | 142 | 10.140 | 24.973 | 7.426  | 1.00199.22 |       |       | C |
| ANISOU | 970 | CB  | ALA | A | 142 | 32574  | 19888  | 23230  | -7440      | 2078  | -1597 | C |
| ATOM   | 971 | N   | GLY | A | 143 | 7.870  | 26.939 | 9.119  | 1.00203.13 |       |       | N |
| ANISOU | 971 | N   | GLY | A | 143 | 34557  | 20176  | 22447  | -7456      | 755   | -2218 | N |
| ATOM   | 972 | CA  | GLY | A | 143 | 6.465  | 27.207 | 9.357  | 1.00189.76 |       |       | C |
| ANISOU | 972 | CA  | GLY | A | 143 | 33490  | 18175  | 20435  | -7000      | 335   | -2585 | C |
| ATOM   | 973 | C   | GLY | A | 143 | 5.654  | 25.939 | 9.530  | 1.00175.37 |       |       | C |
| ANISOU | 973 | C   | GLY | A | 143 | 31079  | 16426  | 19129  | -6310      | 257   | -2542 | C |
| ATOM   | 974 | O   | GLY | A | 143 | 4.485  | 25.882 | 9.145  | 1.00168.20 |       |       | O |
| ANISOU | 974 | O   | GLY | A | 143 | 30712  | 15115  | 18082  | -5787      | 87    | -2890 | O |
| ATOM   | 975 | N   | TYR | A | 144 | 6.275  | 24.919 | 10.115 | 1.00166.44 |       |       | N |
| ANISOU | 975 | N   | TYR | A | 144 | 22303  | 20250  | 20686  | -7598      | -1650 | 2275  | N |
| ATOM   | 976 | CA  | TYR | A | 144 | 5.619  | 23.630 | 10.298 | 1.00151.87 |       |       | C |
| ANISOU | 976 | CA  | TYR | A | 144 | 20168  | 18699  | 18836  | -7011      | -1553 | 1979  | C |
| ATOM   | 977 | C   | TYR | A | 144 | 5.849  | 23.061 | 11.696 | 1.00146.18 |       |       | C |
| ANISOU | 977 | C   | TYR | A | 144 | 18710  | 18423  | 18408  | -7110      | -1730 | 1919  | C |
| ATOM   | 978 | O   | TYR | A | 144 | 6.889  | 22.458 | 11.962 | 1.00141.36 |       |       | O |

|        |      |     |     |   |     |        |        |        |            |       |       |   |
|--------|------|-----|-----|---|-----|--------|--------|--------|------------|-------|-------|---|
| ANISOU | 978  | O   | TYR | A | 144 | 17405  | 18259  | 18046  | -7256      | -1423 | 2315  | O |
| ATOM   | 979  | CB  | TYR | A | 144 | 6.092  | 22.633 | 9.238  | 1.00147.52 |       |       | C |
| ANISOU | 979  | CB  | TYR | A | 144 | 19477  | 18351  | 18222  | -6701      | -871  | 2275  | C |
| ATOM   | 980  | CG  | TYR | A | 144 | 5.744  | 23.032 | 7.821  | 1.00147.46 |       |       | C |
| ANISOU | 980  | CG  | TYR | A | 144 | 20305  | 17923  | 17802  | -6484      | -690  | 2291  | C |
| ATOM   | 981  | CD1 | TYR | A | 144 | 4.432  | 22.982 | 7.370  | 1.00144.67 |       |       | C |
| ANISOU | 981  | CD1 | TYR | A | 144 | 20583  | 17256  | 17129  | -5974      | -1015 | 1776  | C |
| ATOM   | 982  | CD2 | TYR | A | 144 | 6.726  | 23.452 | 6.934  | 1.00152.84 |       |       | C |
| ANISOU | 982  | CD2 | TYR | A | 144 | 21139  | 18536  | 18398  | -6780      | -192  | 2819  | C |
| ATOM   | 983  | CE1 | TYR | A | 144 | 4.105  | 23.344 | 6.078  | 1.00148.76 |       |       | C |
| ANISOU | 983  | CE1 | TYR | A | 144 | 21922  | 17402  | 17198  | -5717      | -933  | 1788  | C |
| ATOM   | 984  | CE2 | TYR | A | 144 | 6.409  | 23.817 | 5.637  | 1.00157.63 |       |       | C |
| ANISOU | 984  | CE2 | TYR | A | 144 | 22626  | 18738  | 18529  | -6551      | -12   | 2865  | C |
| ATOM   | 985  | CZ  | TYR | A | 144 | 5.096  | 23.762 | 5.215  | 1.00151.78 |       |       | C |
| ANISOU | 985  | CZ  | TYR | A | 144 | 22563  | 17688  | 17418  | -5994      | -425  | 2349  | C |
| ATOM   | 986  | OH  | TYR | A | 144 | 4.772  | 24.123 | 3.926  | 1.00148.50 |       |       | O |
| ANISOU | 986  | OH  | TYR | A | 144 | 23080  | 16884  | 16460  | -5708      | -329  | 2391  | O |
| ATOM   | 987  | N   | PRO | A | 145 | 4.869  | 23.246 | 12.595 | 1.00144.53 |       |       | N |
| ANISOU | 987  | N   | PRO | A | 145 | 18665  | 18102  | 18149  | -6986      | -2216 | 1424  | N |
| ATOM   | 988  | CA  | PRO | A | 145 | 3.621  | 23.962 | 12.316 | 1.00143.47 |       |       | C |
| ANISOU | 988  | CA  | PRO | A | 145 | 19264  | 17476  | 17773  | -6745      | -2597 | 926   | C |
| ATOM   | 989  | C   | PRO | A | 145 | 3.755  | 25.455 | 12.585 | 1.00155.98 |       |       | C |
| ANISOU | 989  | C   | PRO | A | 145 | 21294  | 18664  | 19308  | -7196      | -3032 | 918   | C |
| ATOM   | 990  | O   | PRO | A | 145 | 4.766  | 25.896 | 13.131 | 1.00163.28 |       |       | O |
| ANISOU | 990  | O   | PRO | A | 145 | 21905  | 19724  | 20411  | -7761      | -3081 | 1236  | O |
| ATOM   | 991  | CB  | PRO | A | 145 | 2.653  | 23.349 | 13.323 | 1.00132.89 |       |       | C |
| ANISOU | 991  | CB  | PRO | A | 145 | 17718  | 16293  | 16482  | -6438      | -2803 | 429   | C |
| ATOM   | 992  | CG  | PRO | A | 145 | 3.518  | 23.052 | 14.502 | 1.00132.29 |       |       | C |
| ANISOU | 992  | CG  | PRO | A | 145 | 17029  | 16636  | 16601  | -6774      | -2812 | 686   | C |
| ATOM   | 993  | CD  | PRO | A | 145 | 4.871  | 22.661 | 13.947 | 1.00138.53 |       |       | C |
| ANISOU | 993  | CD  | PRO | A | 145 | 17376  | 17713  | 17544  | -6989      | -2384 | 1308  | C |
| ATOM   | 994  | N   | GLY | A | 146 | 2.739  | 26.221 | 12.208 | 1.00160.23 |       |       | N |
| ANISOU | 994  | N   | GLY | A | 146 | 22556  | 18702  | 19621  | -6936      | -3371 | 536   | N |
| ATOM   | 995  | CA  | GLY | A | 146 | 2.750  | 27.654 | 12.432 | 1.00167.65 |       |       | C |
| ANISOU | 995  | CA  | GLY | A | 146 | 24059  | 19146  | 20492  | -7288      | -3787 | 485   | C |
| ATOM   | 996  | C   | GLY | A | 146 | 2.108  | 28.029 | 13.752 | 1.00161.38 |       |       | C |
| ANISOU | 996  | C   | GLY | A | 146 | 23242  | 18325  | 19751  | -7291      | -4266 | -6    | C |
| ATOM   | 997  | O   | GLY | A | 146 | 1.157  | 27.384 | 14.193 | 1.00167.57 |       |       | O |
| ANISOU | 997  | O   | GLY | A | 146 | 23847  | 19292  | 20528  | -6830      | -4329 | -447  | O |
| ATOM   | 998  | N   | VAL | A | 147 | 2.632  | 29.072 | 14.389 | 1.00144.62 |       |       | N |
| ANISOU | 998  | N   | VAL | A | 147 | 21312  | 15960  | 17676  | -7840      | -4571 | 54    | N |
| ATOM   | 999  | CA  | VAL | A | 147 | 2.072  | 29.555 | 15.644 | 1.00132.39 |       |       | C |
| ANISOU | 999  | CA  | VAL | A | 147 | 19865  | 14328  | 16109  | -7859      | -5026 | -428  | C |
| ATOM   | 1000 | C   | VAL | A | 147 | 1.673  | 31.013 | 15.537 | 1.00135.34 |       |       | C |
| ANISOU | 1000 | C   | VAL | A | 147 | 21123  | 13959  | 16343  | -7947      | -5437 | -655  | C |
| ATOM   | 1001 | O   | VAL | A | 147 | 2.531  | 31.894 | 15.473 | 1.00143.74 |       |       | O |
| ANISOU | 1001 | O   | VAL | A | 147 | 22450  | 14706  | 17457  | -8568      | -5522 | -358  | O |
| ATOM   | 1002 | CB  | VAL | A | 147 | 3.070  | 29.432 | 16.803 | 1.00130.42 |       |       | C |
| ANISOU | 1002 | CB  | VAL | A | 147 | 19041  | 14497  | 16017  | -8432      | -5114 | -247  | C |
| ATOM   | 1003 | CG1 | VAL | A | 147 | 2.442  | 29.957 | 18.088 | 1.00130.88 |       |       | C |
| ANISOU | 1003 | CG1 | VAL | A | 147 | 19244  | 14515  | 15970  | -8116      | -5374 | -747  | C |
| ATOM   | 1004 | CG2 | VAL | A | 147 | 3.516  | 27.993 | 16.969 | 1.00134.46 |       |       | C |
| ANISOU | 1004 | CG2 | VAL | A | 147 | 18720  | 15709  | 16660  | -8299      | -4732 | 16    | C |
| ATOM   | 1005 | N   | LEU | A | 148 | 0.370  | 31.266 | 15.517 | 1.00131.90 |       |       | N |
| ANISOU | 1005 | N   | LEU | A | 148 | 21127  | 13229  | 15760  | -7323      | -5680 | -1192 | N |
| ATOM   | 1006 | CA  | LEU | A | 148 | -0.124 | 32.632 | 15.484 | 1.00144.01 |       |       | C |
| ANISOU | 1006 | CA  | LEU | A | 148 | 23499  | 14057  | 17160  | -7197      | -6042 | -1443 | C |
| ATOM   | 1007 | C   | LEU | A | 148 | 0.316  | 33.347 | 16.752 | 1.00160.46 |       |       | C |
| ANISOU | 1007 | C   | LEU | A | 148 | 25465  | 16188  | 19316  | -7457      | -6117 | -1526 | C |
| ATOM   | 1008 | O   | LEU | A | 148 | 0.011  | 32.911 | 17.863 | 1.00166.32 |       |       | O |
| ANISOU | 1008 | O   | LEU | A | 148 | 25728  | 17372  | 20095  | -7231      | -6068 | -1827 | O |
| ATOM   | 1009 | CB  | LEU | A | 148 | -1.646 | 32.662 | 15.358 | 1.00140.95 |       |       | C |
| ANISOU | 1009 | CB  | LEU | A | 148 | 23384  | 13503  | 16666  | -6329      | -6246 | -2042 | C |
| ATOM   | 1010 | CG  | LEU | A | 148 | -2.202 | 33.660 | 14.340 | 1.00148.35 |       |       | C |
| ANISOU | 1010 | CG  | LEU | A | 148 | 25318  | 13655  | 17394  | -6005      | -6582 | -2119 | C |
| ATOM   | 1011 | CD1 | LEU | A | 148 | -3.715 | 33.774 | 14.464 | 1.00138.62 |       |       | C |
| ANISOU | 1011 | CD1 | LEU | A | 148 | 24159  | 12374  | 16136  | -5073      | -6808 | -2768 | C |
| ATOM   | 1012 | CD2 | LEU | A | 148 | -1.536 | 35.025 | 14.482 | 1.00147.67 |       |       | C |
| ANISOU | 1012 | CD2 | LEU | A | 148 | 25909  | 12941  | 17258  | -6475      | -6720 | -1876 | C |
| ATOM   | 1013 | N   | SER | A | 149 | 1.041  | 34.447 | 16.572 | 1.00165.71 |       |       | N |



|        |      |     |     |   |     |         |        |        |            |       |       |   |
|--------|------|-----|-----|---|-----|---------|--------|--------|------------|-------|-------|---|
| ANISOU | 1013 | N   | SER | A | 149 | 26624   | 16360  | 19977  | -7959      | -6226 | -1264 | N |
| ATOM   | 1014 | CA  | SER | A | 149 | 1.573   | 35.218 | 17.688 | 1.00166.42 |       |       | C |
| ANISOU | 1014 | CA  | SER | A | 149 | 26670   | 16437  | 20125  | -8284      | -6344 | -1350 | C |
| ATOM   | 1015 | C   | SER | A | 149 | 0.460   | 35.851 | 18.515 | 1.00166.58 |       |       | C |
| ANISOU | 1015 | C   | SER | A | 149 | 27065   | 16212  | 20016  | -7704      | -6572 | -1966 | C |
| ATOM   | 1016 | O   | SER | A | 149 | 0.692   | 36.309 | 19.634 | 1.00170.21 |       |       | O |
| ANISOU | 1016 | O   | SER | A | 149 | 27453   | 16746  | 20472  | -7850      | -6669 | -2167 | O |
| ATOM   | 1017 | CB  | SER | A | 149 | 2.519   | 36.301 | 17.174 | 1.00180.28 |       |       | C |
| ANISOU | 1017 | CB  | SER | A | 149 | 28926   | 17641  | 21930  | -8961      | -6380 | -963  | C |
| ATOM   | 1018 | OG  | SER | A | 149 | 1.856   | 37.141 | 16.246 | 1.00194.18 |       |       | O |
| ANISOU | 1018 | OG  | SER | A | 149 | 31683   | 18585  | 23511  | -8713      | -6531 | -1008 | O |
| ATOM   | 1019 | N   | SER | A | 150 | -0.745  | 35.878 | 17.957 | 1.00171.48 |       |       | N |
| ANISOU | 1019 | N   | SER | A | 150 | 28074   | 16551  | 20530  | -7031      | -6664 | -2284 | N |
| ATOM   | 1020 | CA  | SER | A | 150 | -1.902  | 36.416 | 18.658 | 1.00176.87 |       |       | C |
| ANISOU | 1020 | CA  | SER | A | 150 | 29027   | 17045  | 21131  | -6406      | -6824 | -2889 | C |
| ATOM   | 1021 | C   | SER | A | 150 | -2.861  | 35.301 | 19.073 | 1.00168.70 |       |       | C |
| ANISOU | 1021 | C   | SER | A | 150 | 27353   | 16609  | 20137  | -5839      | -6641 | -3282 | C |
| ATOM   | 1022 | O   | SER | A | 150 | -2.803  | 34.188 | 18.547 | 1.00158.51 |       |       | O |
| ANISOU | 1022 | O   | SER | A | 150 | 25579   | 15731  | 18916  | -5820      | -6450 | -3105 | O |
| ATOM   | 1023 | CB  | SER | A | 150 | -2.626  | 37.441 | 17.780 | 1.00184.29 |       |       | C |
| ANISOU | 1023 | CB  | SER | A | 150 | 30904   | 17171  | 21946  | -5987      | -7109 | -3013 | C |
| ATOM   | 1024 | OG  | SER | A | 150 | -3.716  | 38.030 | 18.471 | 1.00157.17 |       |       | O |
| ANISOU | 1024 | OG  | SER | A | 150 | 27705   | 13548  | 18464  | -5369      | -7257 | -3597 | O |
| ATOM   | 1025 | N   | ARG | A | 151 | -3.736  | 35.609 | 20.024 | 1.00165.64 |       |       | N |
| ANISOU | 1025 | N   | ARG | A | 151 | 26987   | 16244  | 19705  | -5421      | -6668 | -3825 | N |
| ATOM   | 1026 | CA  | ARG | A | 151 | -4.749  | 34.665 | 20.478 | 1.00155.19 |       |       | C |
| ANISOU | 1026 | CA  | ARG | A | 151 | 25115   | 15424  | 18428  | -4928      | -6455 | -4259 | C |
| ATOM   | 1027 | C   | ARG | A | 151 | -6.084  | 34.973 | 19.813 | 1.00156.77 |       |       | C |
| ANISOU | 1027 | C   | ARG | A | 151 | 25594   | 15317  | 18654  | -4183      | -6604 | -4681 | C |
| ATOM   | 1028 | O   | ARG | A | 151 | -6.299  | 36.084 | 19.333 | 1.00163.15 |       |       | O |
| ANISOU | 1028 | O   | ARG | A | 151 | 27114   | 15483  | 19394  | -3969      | -6910 | -4718 | O |
| ATOM   | 1029 | CB  | ARG | A | 151 | -4.899  | 34.736 | 21.999 | 1.00156.98 |       |       | C |
| ANISOU | 1029 | CB  | ARG | A | 151 | 25179   | 15908  | 18558  | -4964      | -6351 | -4619 | C |
| ATOM   | 1030 | CG  | ARG | A | 151 | -3.634  | 34.390 | 22.764 | 1.00163.31 |       |       | C |
| ANISOU | 1030 | CG  | ARG | A | 151 | 25674   | 17067  | 19309  | -5599      | -6290 | -4252 | C |
| ATOM   | 1031 | CD  | ARG | A | 151 | -3.833  | 34.507 | 24.267 | 1.00164.97 |       |       | C |
| ANISOU | 1031 | CD  | ARG | A | 151 | 25868   | 17483  | 19331  | -5584      | -6260 | -4642 | C |
| ATOM   | 1032 | NE  | ARG | A | 151 | -2.685  | 33.981 | 25.000 | 1.00144.82 |       |       | N |
| ANISOU | 1032 | NE  | ARG | A | 151 | 22965   | 15355  | 16705  | -6095      | -6260 | -4300 | N |
| ATOM   | 1033 | CZ  | ARG | A | 151 | -2.601  | 32.738 | 25.465 | 1.00156.77 |       |       | C |
| ANISOU | 1033 | CZ  | ARG | A | 151 | 23953   | 17437  | 18173  | -6112      | -6057 | -4210 | C |
| ATOM   | 1034 | NH1 | ARG | A | 151 | -3.605  | 31.887 | 25.286 | 1.00149.32 |       |       | N |
| ANISOU | 1034 | NH1 | ARG | A | 151 | 22760   | 16698  | 17277  | -5711      | -5795 | -4465 | N |
| ATOM   | 1035 | NH2 | ARG | A | 151 | -1.515  | 32.345 | 26.114 | 1.00155.08 |       |       | N |
| ANISOU | 1035 | NH2 | ARG | A | 151 | 23482   | 17574  | 17867  | -6540      | -6140 | -3873 | N |
| ATOM   | 1036 | N   | ASP | A | 152 | -6.981  | 33.993 | 19.788 | 1.00138.63 |       |       | N |
| ANISOU | 1036 | N   | ASP | A | 152 | 22744   | 13462  | 16468  | -3778      | -6412 | -5003 | N |
| ATOM   | 1037 | CA  | ASP | A | 152 | -8.302  | 34.192 | 19.197 | 1.00147.08 |       |       | C |
| ANISOU | 1037 | CA  | ASP | A | 152 | 23916   | 14348  | 17619  | -3020      | -6581 | -5454 | C |
| ATOM   | 1038 | C   | ASP | A | 152 | -9.194  | 35.034 | 20.103 | 1.00151.72 |       |       | C |
| ANISOU | 1038 | C   | ASP | A | 152 | 24746   | 14722  | 18180  | -2605      | -6647 | -6014 | C |
| ATOM   | 1039 | O   | ASP | A | 152 | -8.723  | 35.624 | 21.075 | 1.00147.63 |       |       | O |
| ANISOU | 1039 | O   | ASP | A | 152 | 24482   | 14085  | 17526  | -2929      | -6606 | -6025 | O |
| ATOM   | 1040 | CB  | ASP | A | 152 | -8.974  | 32.851 | 18.880 | 1.00143.24 |       |       | C |
| ANISOU | 1040 | CB  | ASP | A | 152 | 22692   | 14417  | 17314  | -2777      | -6344 | -5649 | C |
| ATOM   | 1041 | CG  | ASP | A | 152 | -8.966  | 31.889 | 20.058 | 1.00142.10 |       |       | C |
| ANISOU | 1041 | CG  | ASP | A | 152 | 21939   | 14844  | 17209  | -3069      | -5917 | -5803 | C |
| ATOM   | 1042 | OD1 | ASP | A | 152 | -8.884  | 32.348 | 21.216 | 1.00156.84 |       |       | O |
| ANISOU | 1042 | OD1 | ASP | A | 152 | 23950   | 16695  | 18947  | -3221      | -5842 | -5976 | O |
| ATOM   | 1043 | OD2 | ASP | A | 152 | -9.047  | 30.666 | 19.822 | 1.00130.96 |       |       | O |
| ANISOU | 1043 | OD2 | ASP | A | 152 | 19970   | 13860  | 15929  | -3142      | -5670 | -5763 | O |
| ATOM   | 1044 | N   | LYS | A | 153 | -10.484 | 35.079 | 19.788 | 1.00152.11 |       |       | N |
| ANISOU | 1044 | N   | LYS | A | 153 | 24690   | 14736  | 18369  | -1865      | -6764 | -6504 | N |
| ATOM   | 1045 | CA  | LYS | A | 153 | -11.422 | 35.854 | 20.590 | 1.00164.88 |       |       | C |
| ANISOU | 1045 | CA  | LYS | A | 153 | 26508   | 16145  | 19993  | -1373      | -6815 | -7082 | C |
| ATOM   | 1046 | C   | LYS | A | 153 | -11.789 | 35.113 | 21.874 | 1.00175.33 |       |       | C |
| ANISOU | 1046 | C   | LYS | A | 153 | 27277   | 18005  | 21334  | -1518      | -6359 | -7456 | C |
| ATOM   | 1047 | O   | LYS | A | 153 | -12.487 | 35.648 | 22.734 | 1.00188.60 |       |       | O |
| ANISOU | 1047 | O   | LYS | A | 153 | 29102   | 19576  | 22979  | -1191      | -6295 | -7957 | O |
| ATOM   | 1048 | CB  | LYS | A | 153 | -12.676 | 36.208 | 19.786 | 1.00162.02 |       |       | C |

|        |      |     |     |   |     |         |        |        |            |       |       |   |
|--------|------|-----|-----|---|-----|---------|--------|--------|------------|-------|-------|---|
| ANISOU | 1048 | CB  | LYS | A | 153 | 26178   | 15564  | 19817  | -447       | -7160 | -7499 | C |
| ATOM   | 1049 | CG  | LYS | A | 153 | -13.696 | 35.092 | 19.671 | 1.00158.66 |       |       | C |
| ANISOU | 1049 | CG  | LYS | A | 153 | 24846   | 15739  | 19698  | -67        | -6966 | -7919 | C |
| ATOM   | 1050 | CD  | LYS | A | 153 | -14.956 | 35.593 | 18.983 | 1.00174.02 |       |       | C |
| ANISOU | 1050 | CD  | LYS | A | 153 | 26769   | 17488  | 21861  | 918        | -7400 | -8415 | C |
| ATOM   | 1051 | CE  | LYS | A | 153 | -16.069 | 34.559 | 19.027 | 1.00188.14 |       |       | C |
| ANISOU | 1051 | CE  | LYS | A | 153 | 27528   | 19907  | 24048  | 1286       | -7194 | -8963 | C |
| ATOM   | 1052 | NZ  | LYS | A | 153 | -17.267 | 34.998 | 18.255 | 1.00200.20 |       |       | N |
| ANISOU | 1052 | NZ  | LYS | A | 153 | 28907   | 21325  | 25835  | 2277       | -7714 | -9470 | N |
| ATOM   | 1053 | N   | TYR | A | 154 | -11.311 | 33.879 | 21.996 | 1.00169.74 |       |       | N |
| ANISOU | 1053 | N   | TYR | A | 154 | 26005   | 17837  | 20653  | -1988      | -6038 | -7213 | N |
| ATOM   | 1054 | CA  | TYR | A | 154 | -11.515 | 33.093 | 23.207 | 1.00165.47 |       |       | C |
| ANISOU | 1054 | CA  | TYR | A | 154 | 25060   | 17755  | 20056  | -2203      | -5614 | -7485 | C |
| ATOM   | 1055 | C   | TYR | A | 154 | -10.226 | 33.015 | 24.017 | 1.00164.36 |       |       | C |
| ANISOU | 1055 | C   | TYR | A | 154 | 25084   | 17738  | 19629  | -2932      | -5518 | -7081 | C |
| ATOM   | 1056 | O   | TYR | A | 154 | -10.225 | 32.543 | 25.152 | 1.00141.78 |       |       | O |
| ANISOU | 1056 | O   | TYR | A | 154 | 22096   | 15178  | 16595  | -3144      | -5249 | -7272 | O |
| ATOM   | 1057 | CB  | TYR | A | 154 | -12.000 | 31.685 | 22.861 | 1.00167.05 |       |       | C |
| ANISOU | 1057 | CB  | TYR | A | 154 | 24498   | 18456  | 20517  | -2148      | -5330 | -7563 | C |
| ATOM   | 1058 | CG  | TYR | A | 154 | -13.307 | 31.651 | 22.104 | 1.00174.82 |       |       | C |
| ANISOU | 1058 | CG  | TYR | A | 154 | 25113   | 19446  | 21863  | -1414      | -5438 | -8030 | C |
| ATOM   | 1059 | CD1 | TYR | A | 154 | -14.521 | 31.762 | 22.771 | 1.00186.67 |       |       | C |
| ANISOU | 1059 | CD1 | TYR | A | 154 | 26319   | 21053  | 23554  | -906       | -5264 | -8738 | C |
| ATOM   | 1060 | CD2 | TYR | A | 154 | -13.329 | 31.505 | 20.724 | 1.00167.24 |       |       | C |
| ANISOU | 1060 | CD2 | TYR | A | 154 | 24066   | 18420  | 21057  | -1206      | -5723 | -7805 | C |
| ATOM   | 1061 | CE1 | TYR | A | 154 | -15.718 | 31.730 | 22.083 | 1.00189.05 |       |       | C |
| ANISOU | 1061 | CE1 | TYR | A | 154 | 26139   | 21435  | 24258  | -215       | -5409 | -9222 | C |
| ATOM   | 1062 | CE2 | TYR | A | 154 | -14.520 | 31.470 | 20.028 | 1.00172.28 |       |       | C |
| ANISOU | 1062 | CE2 | TYR | A | 154 | 24326   | 19113  | 22022  | -512       | -5911 | -8264 | C |
| ATOM   | 1063 | CZ  | TYR | A | 154 | -15.712 | 31.583 | 20.712 | 1.00180.41 |       |       | C |
| ANISOU | 1063 | CZ  | TYR | A | 154 | 24957   | 20287  | 23303  | -21        | -5775 | -8978 | C |
| ATOM   | 1064 | OH  | TYR | A | 154 | -16.903 | 31.550 | 20.022 | 1.00178.60 |       |       | O |
| ANISOU | 1064 | OH  | TYR | A | 154 | 24223   | 20173  | 23462  | 685        | -6016 | -9494 | O |
| ATOM   | 1065 | N   | GLY | A | 155 | -9.130  | 33.471 | 23.417 | 1.00141.30 |       |       | N |
| ANISOU | 1065 | N   | GLY | A | 155 | 22438   | 14584  | 16667  | -3281      | -5765 | -6535 | N |
| ATOM   | 1066 | CA  | GLY | A | 155 | -7.848  | 33.522 | 24.095 | 1.00166.46 |       |       | C |
| ANISOU | 1066 | CA  | GLY | A | 155 | 25703   | 17875  | 19671  | -3904      | -5773 | -6138 | C |
| ATOM   | 1067 | C   | GLY | A | 155 | -7.010  | 32.265 | 23.963 | 1.00135.73 |       |       | C |
| ANISOU | 1067 | C   | GLY | A | 155 | 21267   | 14472  | 15834  | -4321      | -5596 | -5673 | C |
| ATOM   | 1068 | O   | GLY | A | 155 | -6.116  | 32.018 | 24.773 | 1.00135.76 |       |       | O |
| ANISOU | 1068 | O   | GLY | A | 155 | 21184   | 14711  | 15686  | -4740      | -5575 | -5423 | O |
| ATOM   | 1069 | N   | ARG | A | 156 | -7.288  | 31.472 | 22.936 | 1.00131.71 |       |       | N |
| ANISOU | 1069 | N   | ARG | A | 156 | 20412   | 14100  | 15532  | -4171      | -5505 | -5553 | N |
| ATOM   | 1070 | CA  | ARG | A | 156 | -6.571  | 30.218 | 22.737 | 1.00131.06 |       |       | C |
| ANISOU | 1070 | CA  | ARG | A | 156 | 19838   | 14437  | 15521  | -4510      | -5312 | -5128 | C |
| ATOM   | 1071 | C   | ARG | A | 156 | -5.406  | 30.387 | 21.770 | 1.00126.30 |       |       | C |
| ANISOU | 1071 | C   | ARG | A | 156 | 19338   | 13683  | 14966  | -4848      | -5471 | -4487 | C |
| ATOM   | 1072 | O   | ARG | A | 156 | -5.465  | 31.201 | 20.848 | 1.00132.64 |       |       | O |
| ANISOU | 1072 | O   | ARG | A | 156 | 20549   | 14052  | 15795  | -4715      | -5702 | -4420 | O |
| ATOM   | 1073 | CB  | ARG | A | 156 | -7.520  | 29.133 | 22.226 | 1.00123.52 |       |       | C |
| ANISOU | 1073 | CB  | ARG | A | 156 | 18435   | 13728  | 14768  | -4212      | -5079 | -5398 | C |
| ATOM   | 1074 | CG  | ARG | A | 156 | -8.810  | 29.015 | 23.021 | 1.00125.35 |       |       | C |
| ANISOU | 1074 | CG  | ARG | A | 156 | 18567   | 14050  | 15009  | -3872      | -4895 | -6078 | C |
| ATOM   | 1075 | CD  | ARG | A | 156 | -9.607  | 27.799 | 22.595 | 1.00136.52 |       |       | C |
| ANISOU | 1075 | CD  | ARG | A | 156 | 19412   | 15745  | 16715  | -3666      | -4621 | -6301 | C |
| ATOM   | 1076 | NE  | ARG | A | 156 | -9.813  | 27.753 | 21.150 | 1.00141.90 |       |       | N |
| ANISOU | 1076 | NE  | ARG | A | 156 | 19998   | 16314  | 17605  | -3396      | -4779 | -6179 | N |
| ATOM   | 1077 | CZ  | ARG | A | 156 | -10.900 | 28.203 | 20.532 | 1.00141.35 |       |       | C |
| ANISOU | 1077 | CZ  | ARG | A | 156 | 19905   | 16091  | 17712  | -2818      | -4930 | -6572 | C |
| ATOM   | 1078 | NH1 | ARG | A | 156 | -11.891 | 28.734 | 21.234 | 1.00135.94 |       |       | N |
| ANISOU | 1078 | NH1 | ARG | A | 156 | 19216   | 15350  | 17085  | -2438      | -4900 | -7122 | N |
| ATOM   | 1079 | NH2 | ARG | A | 156 | -10.997 | 28.119 | 19.213 | 1.00123.16 |       |       | N |
| ANISOU | 1079 | NH2 | ARG | A | 156 | 17583   | 13697  | 15517  | -2584      | -5139 | -6443 | N |
| ATOM   | 1080 | N   | VAL | A | 157 | -4.348  | 29.615 | 21.989 | 1.00123.86 |       |       | N |
| ANISOU | 1080 | N   | VAL | A | 157 | 18700   | 13715  | 14646  | -5292      | -5351 | -4008 | N |
| ATOM   | 1081 | CA  | VAL | A | 157 | -3.208  | 29.615 | 21.087 | 1.00123.43 |       |       | C |
| ANISOU | 1081 | CA  | VAL | A | 157 | 18648   | 13596  | 14655  | -5678      | -5422 | -3399 | C |
| ATOM   | 1082 | C   | VAL | A | 157 | -3.607  | 29.005 | 19.757 | 1.00129.08 |       |       | C |
| ANISOU | 1082 | C   | VAL | A | 157 | 19274   | 14272  | 15498  | -5462      | -5340 | -3338 | C |
| ATOM   | 1083 | O   | VAL | A | 157 | -3.811  | 27.796 | 19.660 | 1.00119.26 |       |       | O |

|        |      |     |     |   |     |        |        |        |            |       |       |   |
|--------|------|-----|-----|---|-----|--------|--------|--------|------------|-------|-------|---|
| ANISOU | 1083 | O   | VAL | A | 157 | 17588  | 13385  | 14340  | -5410      | -5088 | -3333 | O |
| ATOM   | 1084 | CB  | VAL | A | 157 | -2.049 | 28.790 | 21.646 | 1.00122.24 |       |       | C |
| ANISOU | 1084 | CB  | VAL | A | 157 | 18056  | 13904  | 14486  | -6144      | -5293 | -2926 | C |
| ATOM   | 1085 | CG1 | VAL | A | 157 | -0.842 | 28.913 | 20.735 | 1.00123.07 |       |       | C |
| ANISOU | 1085 | CG1 | VAL | A | 157 | 18125  | 13949  | 14688  | -6589      | -5345 | -2327 | C |
| ATOM   | 1086 | CG2 | VAL | A | 157 | -1.715 | 29.236 | 23.055 | 1.00125.64 |       |       | C |
| ANISOU | 1086 | CG2 | VAL | A | 157 | 18568  | 14438  | 14730  | -6311      | -5427 | -3041 | C |
| ATOM   | 1087 | N   | VAL | A | 158 | -3.719 | 29.841 | 18.732 | 1.00149.11 |       |       | N |
| ANISOU | 1087 | N   | VAL | A | 158 | 22305  | 16336  | 18014  | -5346      | -5577 | -3297 | N |
| ATOM   | 1088 | CA  | VAL | A | 158 | -4.119 | 29.365 | 17.414 | 1.00149.94 |       |       | C |
| ANISOU | 1088 | CA  | VAL | A | 158 | 22460  | 16351  | 18158  | -5095      | -5594 | -3276 | C |
| ATOM   | 1089 | C   | VAL | A | 158 | -2.943 | 28.745 | 16.667 | 1.00144.17 |       |       | C |
| ANISOU | 1089 | C   | VAL | A | 158 | 21601  | 15752  | 17424  | -5611      | -5461 | -2657 | C |
| ATOM   | 1090 | O   | VAL | A | 158 | -1.966 | 29.422 | 16.346 | 1.00122.19 |       |       | O |
| ANISOU | 1090 | O   | VAL | A | 158 | 19125  | 12719  | 14581  | -6067      | -5552 | -2222 | O |
| ATOM   | 1091 | CB  | VAL | A | 158 | -4.732 | 30.490 | 16.566 | 1.00155.91 |       |       | C |
| ANISOU | 1091 | CB  | VAL | A | 158 | 23917  | 16508  | 18815  | -4709      | -5960 | -3463 | C |
| ATOM   | 1092 | CG1 | VAL | A | 158 | -5.170 | 29.949 | 15.217 | 1.00152.02 |       |       | C |
| ANISOU | 1092 | CG1 | VAL | A | 158 | 23516  | 15952  | 18293  | -4382      | -6044 | -3482 | C |
| ATOM   | 1093 | CG2 | VAL | A | 158 | -5.908 | 31.116 | 17.297 | 1.00162.71 |       |       | C |
| ANISOU | 1093 | CG2 | VAL | A | 158 | 24856  | 17262  | 19704  | -4180      | -6070 | -4078 | C |
| ATOM   | 1094 | N   | MET | A | 159 | -3.046 | 27.448 | 16.401 | 1.00133.54 |       |       | N |
| ANISOU | 1094 | N   | MET | A | 159 | 19707  | 14845  | 16188  | -5446      | -5083 | -2588 | N |
| ATOM   | 1095 | CA  | MET | A | 159 | -2.015 | 26.729 | 15.667 | 1.00139.23 |       |       | C |
| ANISOU | 1095 | CA  | MET | A | 159 | 20158  | 15798  | 16944  | -5688      | -4731 | -1993 | C |
| ATOM   | 1096 | C   | MET | A | 159 | -2.251 | 26.858 | 14.168 | 1.00139.40 |       |       | C |
| ANISOU | 1096 | C   | MET | A | 159 | 20573  | 15539  | 16854  | -5378      | -4729 | -1912 | C |
| ATOM   | 1097 | O   | MET | A | 159 | -3.390 | 26.967 | 13.715 | 1.00130.76 |       |       | O |
| ANISOU | 1097 | O   | MET | A | 159 | 19708  | 14262  | 15714  | -4855      | -4940 | -2380 | O |
| ATOM   | 1098 | CB  | MET | A | 159 | -1.999 | 25.256 | 16.077 | 1.00142.23 |       |       | C |
| ANISOU | 1098 | CB  | MET | A | 159 | 19862  | 16710  | 17468  | -5612      | -4302 | -1954 | C |
| ATOM   | 1099 | CG  | MET | A | 159 | -1.737 | 25.037 | 17.557 | 1.00142.22 |       |       | C |
| ANISOU | 1099 | CG  | MET | A | 159 | 19542  | 17007  | 17489  | -5869      | -4287 | -1978 | C |
| ATOM   | 1100 | SD  | MET | A | 159 | -0.181 | 25.778 | 18.072 | 1.00153.71 |       |       | S |
| ANISOU | 1100 | SD  | MET | A | 159 | 21000  | 18503  | 18899  | -6555      | -4491 | -1432 | S |
| ATOM   | 1101 | CE  | MET | A | 159 | 0.974  | 24.890 | 17.030 | 1.00141.02 |       |       | C |
| ANISOU | 1101 | CE  | MET | A | 159 | 18970  | 17178  | 17432  | -6679      | -4038 | -751  | C |
| ATOM   | 1102 | N   | LEU | A | 160 | -1.168 | 26.850 | 13.401 | 1.00139.41 |       |       | N |
| ANISOU | 1102 | N   | LEU | A | 160 | 20645  | 15527  | 16799  | -5686      | -4492 | -1325 | N |
| ATOM   | 1103 | CA  | LEU | A | 160 | -1.266 | 27.001 | 11.957 | 1.00130.83 |       |       | C |
| ANISOU | 1103 | CA  | LEU | A | 160 | 20045  | 14161  | 15505  | -5419      | -4444 | -1177 | C |
| ATOM   | 1104 | C   | LEU | A | 160 | -0.534 | 25.874 | 11.241 | 1.00132.59 |       |       | C |
| ANISOU | 1104 | C   | LEU | A | 160 | 19894  | 14741  | 15744  | -5456      | -3897 | -762  | C |
| ATOM   | 1105 | O   | LEU | A | 160 | 0.498  | 25.395 | 11.714 | 1.00122.50 |       |       | O |
| ANISOU | 1105 | O   | LEU | A | 160 | 18097  | 13808  | 14640  | -5857      | -3569 | -358  | O |
| ATOM   | 1106 | CB  | LEU | A | 160 | -0.698 | 28.355 | 11.519 | 1.00136.04 |       |       | C |
| ANISOU | 1106 | CB  | LEU | A | 160 | 21414  | 14284  | 15992  | -5737      | -4636 | -852  | C |
| ATOM   | 1107 | CG  | LEU | A | 160 | -1.311 | 29.618 | 12.128 | 1.00145.86 |       |       | C |
| ANISOU | 1107 | CG  | LEU | A | 160 | 23195  | 15036  | 17189  | -5702      | -5174 | -1221 | C |
| ATOM   | 1108 | CD1 | LEU | A | 160 | -0.582 | 30.864 | 11.640 | 1.00132.54 |       |       | C |
| ANISOU | 1108 | CD1 | LEU | A | 160 | 22247  | 12761  | 15353  | -6119      | -5264 | -807  | C |
| ATOM   | 1109 | CD2 | LEU | A | 160 | -2.798 | 29.706 | 11.816 | 1.00141.08 |       |       | C |
| ANISOU | 1109 | CD2 | LEU | A | 160 | 22880  | 14243  | 16479  | -4927      | -5536 | -1840 | C |
| ATOM   | 1110 | N   | PHE | A | 161 | -1.082 | 25.450 | 10.105 | 1.00143.65 |       |       | N |
| ANISOU | 1110 | N   | PHE | A | 161 | 21567  | 16061  | 16953  | -4994      | -3827 | -888  | N |
| ATOM   | 1111 | CA  | PHE | A | 161 | -0.424 | 24.470 | 9.248  | 1.00148.36 |       |       | C |
| ANISOU | 1111 | CA  | PHE | A | 161 | 21982  | 16901  | 17485  | -4964      | -3294 | -525  | C |
| ATOM   | 1112 | C   | PHE | A | 161 | -0.915 | 24.583 | 7.807  | 1.00159.44 |       |       | C |
| ANISOU | 1112 | C   | PHE | A | 161 | 24065  | 18014  | 18500  | -4519      | -3363 | -605  | C |
| ATOM   | 1113 | O   | PHE | A | 161 | -2.081 | 24.316 | 7.517  | 1.00158.84 |       |       | O |
| ANISOU | 1113 | O   | PHE | A | 161 | 24111  | 17890  | 18349  | -4017      | -3680 | -1157 | O |
| ATOM   | 1114 | CB  | PHE | A | 161 | -0.641 | 23.047 | 9.767  | 1.00144.13 |       |       | C |
| ANISOU | 1114 | CB  | PHE | A | 161 | 20746  | 16818  | 17200  | -4820      | -2998 | -725  | C |
| ATOM   | 1115 | CG  | PHE | A | 161 | 0.275  | 22.032 | 9.143  | 1.00156.98 |       |       | C |
| ANISOU | 1115 | CG  | PHE | A | 161 | 22110  | 18709  | 18827  | -4851      | -2388 | -287  | C |
| ATOM   | 1116 | CD1 | PHE | A | 161 | 1.503  | 21.746 | 9.716  | 1.00159.39 |       |       | C |
| ANISOU | 1116 | CD1 | PHE | A | 161 | 21893  | 19324  | 19346  | -5247      | -2027 | 229   | C |
| ATOM   | 1117 | CD2 | PHE | A | 161 | -0.084 | 21.373 | 7.979  | 1.00166.52 |       |       | C |
| ANISOU | 1117 | CD2 | PHE | A | 161 | 23597  | 19861  | 19811  | -4451      | -2200 | -417  | C |
| ATOM   | 1118 | CE1 | PHE | A | 161 | 2.352  | 20.817 | 9.143  | 1.00161.57 |       |       | C |

|        |      |     |     |   |     |        |        |        |            |       |       |   |
|--------|------|-----|-----|---|-----|--------|--------|--------|------------|-------|-------|---|
| ANISOU | 1118 | CE1 | PHE | A | 161 | 21897  | 19845  | 19648  | -5201      | -1438 | 622   | C |
| ATOM   | 1119 | CE2 | PHE | A | 161 | 0.762  | 20.444 | 7.402  | 1.00169.96 |       |       | C |
| ANISOU | 1119 | CE2 | PHE | A | 161 | 23843  | 20507  | 20227  | -4435      | -1595 | -41   | C |
| ATOM   | 1120 | CZ  | PHE | A | 161 | 1.982  | 20.166 | 7.986  | 1.00166.19 |       |       | C |
| ANISOU | 1120 | CZ  | PHE | A | 161 | 22813  | 20334  | 19999  | -4790      | -1188 | 487   | C |
| ATOM   | 1121 | N   | ASN | A | 162 | -0.016 | 24.979 | 6.910  | 1.00172.25 |       |       | N |
| ANISOU | 1121 | N   | ASN | A | 162 | 26122  | 19459  | 19865  | -4711      | -3065 | -59   | N |
| ATOM   | 1122 | CA  | ASN | A | 162 | -0.344 | 25.112 | 5.495  | 1.00181.42 |       |       | C |
| ANISOU | 1122 | CA  | ASN | A | 162 | 28056  | 20333  | 20541  | -4296      | -3087 | -47   | C |
| ATOM   | 1123 | C   | ASN | A | 162 | 0.236  | 23.959 | 4.682  | 1.00183.27 |       |       | C |
| ANISOU | 1123 | C   | ASN | A | 162 | 28121  | 20864  | 20651  | -4195      | -2461 | 200   | C |
| ATOM   | 1124 | O   | ASN | A | 162 | 1.453  | 23.791 | 4.612  | 1.00182.77 |       |       | O |
| ANISOU | 1124 | O   | ASN | A | 162 | 27807  | 20968  | 20670  | -4590      | -1876 | 768   | O |
| ATOM   | 1125 | CB  | ASN | A | 162 | 0.170  | 26.448 | 4.953  | 1.00190.79 |       |       | C |
| ANISOU | 1125 | CB  | ASN | A | 162 | 30059  | 21009  | 21424  | -4540      | -3142 | 396   | C |
| ATOM   | 1126 | CG  | ASN | A | 162 | -0.510 | 26.856 | 3.660  | 1.00199.99 |       |       | C |
| ANISOU | 1126 | CG  | ASN | A | 162 | 32223  | 21763  | 22002  | -3981      | -3414 | 291   | C |
| ATOM   | 1127 | OD1 | ASN | A | 162 | -1.114 | 26.031 | 2.973  | 1.00207.08 |       |       | O |
| ANISOU | 1127 | OD1 | ASN | A | 162 | 33174  | 22826  | 22680  | -3473      | -3452 | -23   | O |
| ATOM   | 1128 | ND2 | ASN | A | 162 | -0.414 | 28.137 | 3.321  | 1.00201.59 |       |       | N |
| ANISOU | 1128 | ND2 | ASN | A | 162 | 33273  | 21397  | 21924  | -4072      | -3631 | 548   | N |
| ATOM   | 1129 | N   | ILE | A | 163 | -0.638 | 23.171 | 4.062  | 1.00186.00 |       |       | N |
| ANISOU | 1129 | N   | ILE | A | 163 | 28587  | 21273  | 20814  | -3661      | -2587 | -260  | N |
| ATOM   | 1130 | CA  | ILE | A | 163 | -0.208 | 21.993 | 3.317  | 1.00188.05 |       |       | C |
| ANISOU | 1130 | CA  | ILE | A | 163 | 28737  | 21772  | 20940  | -3506      | -2017 | -137  | C |
| ATOM   | 1131 | C   | ILE | A | 163 | 0.298  | 22.348 | 1.921  | 1.00194.79 |       |       | C |
| ANISOU | 1131 | C   | ILE | A | 163 | 30444  | 22376  | 21192  | -3376      | -1728 | 259   | C |
| ATOM   | 1132 | O   | ILE | A | 163 | 0.954  | 21.537 | 1.265  | 1.00195.37 |       |       | O |
| ANISOU | 1132 | O   | ILE | A | 163 | 30500  | 22623  | 21111  | -3321      | -1107 | 508   | O |
| ATOM   | 1133 | CB  | ILE | A | 163 | -1.346 | 20.958 | 3.189  | 1.00183.12 |       |       | C |
| ANISOU | 1133 | CB  | ILE | A | 163 | 27932  | 21282  | 20362  | -3045      | -2263 | -838  | C |
| ATOM   | 1134 | CG1 | ILE | A | 163 | -0.773 | 19.552 | 3.000  | 1.00177.28 |       |       | C |
| ANISOU | 1134 | CG1 | ILE | A | 163 | 26785  | 20840  | 19734  | -3034      | -1594 | -727  | C |
| ATOM   | 1135 | CG2 | ILE | A | 163 | -2.274 | 21.323 | 2.043  | 1.00188.63 |       |       | C |
| ANISOU | 1135 | CG2 | ILE | A | 163 | 29453  | 21691  | 20526  | -2521      | -2777 | -1215 | C |
| ATOM   | 1136 | CD1 | ILE | A | 163 | 0.199  | 19.144 | 4.079  | 1.00171.92 |       |       | C |
| ANISOU | 1136 | CD1 | ILE | A | 163 | 25310  | 20469  | 19544  | -3459      | -1117 | -314  | C |
| ATOM   | 1137 | N   | GLU | A | 164 | -0.008 | 23.562 | 1.472  | 1.00196.99 |       |       | N |
| ANISOU | 1137 | N   | GLU | A | 164 | 31526  | 22218  | 21102  | -3296      | -2147 | 326   | N |
| ATOM   | 1138 | CA  | GLU | A | 164 | 0.401  | 24.014 | 0.147  | 1.00202.84 |       |       | C |
| ANISOU | 1138 | CA  | GLU | A | 164 | 33238  | 22651  | 21181  | -3157      | -1887 | 728   | C |
| ATOM   | 1139 | C   | GLU | A | 164 | 1.921  | 24.016 | 0.022  | 1.00205.15 |       |       | C |
| ANISOU | 1139 | C   | GLU | A | 164 | 33336  | 23061  | 21549  | -3704      | -992  | 1489  | C |
| ATOM   | 1140 | O   | GLU | A | 164 | 2.623  | 24.520 | 0.899  | 1.00208.28 |       |       | O |
| ANISOU | 1140 | O   | GLU | A | 164 | 33229  | 23511  | 22398  | -4283      | -859  | 1812  | O |
| ATOM   | 1141 | CB  | GLU | A | 164 | -0.162 | 25.408 | -0.143 | 1.00215.52 |       |       | C |
| ANISOU | 1141 | CB  | GLU | A | 164 | 35764  | 23700  | 22425  | -3002      | -2508 | 722   | C |
| ATOM   | 1142 | CG  | GLU | A | 164 | 0.175  | 25.944 | -1.525 | 1.00235.05 |       |       | C |
| ANISOU | 1142 | CG  | GLU | A | 164 | 39413  | 25779  | 24116  | -2816      | -2270 | 1160  | C |
| ATOM   | 1143 | CD  | GLU | A | 164 | -0.465 | 27.292 | -1.801 | 1.00250.80 |       |       | C |
| ANISOU | 1143 | CD  | GLU | A | 164 | 42405  | 27159  | 25729  | -2567      | -2941 | 1146  | C |
| ATOM   | 1144 | OE1 | GLU | A | 164 | -1.263 | 27.757 | -0.959 | 1.00251.20 |       |       | O |
| ANISOU | 1144 | OE1 | GLU | A | 164 | 42196  | 27116  | 26131  | -2461      | -3625 | 712   | O |
| ATOM   | 1145 | OE2 | GLU | A | 164 | -0.170 | 27.888 | -2.859 | 1.00261.40 |       |       | O |
| ANISOU | 1145 | OE2 | GLU | A | 164 | 44835  | 28087  | 26396  | -2448      | -2752 | 1577  | O |
| ATOM   | 1146 | N   | ASN | A | 165 | 2.415  | 23.433 | -1.067 | 1.00210.11 |       |       | N |
| ANISOU | 1146 | N   | ASN | A | 165 | 34338  | 23753  | 21739  | -3511      | -386  | 1737  | N |
| ATOM   | 1147 | CA  | ASN | A | 165 | 3.849  | 23.326 | -1.328 | 1.00221.52 |       |       | C |
| ANISOU | 1147 | CA  | ASN | A | 165 | 35555  | 25365  | 23249  | -3953      | 569   | 2435  | C |
| ATOM   | 1148 | C   | ASN | A | 165 | 4.619  | 22.585 | -0.237 | 1.00214.79 |       |       | C |
| ANISOU | 1148 | C   | ASN | A | 165 | 33425  | 25029  | 23156  | -4337      | 948   | 2560  | C |
| ATOM   | 1149 | O   | ASN | A | 165 | 5.787  | 22.880 | 0.015  | 1.00221.30 |       |       | O |
| ANISOU | 1149 | O   | ASN | A | 165 | 33806  | 26000  | 24278  | -4876      | 1494  | 3120  | O |
| ATOM   | 1150 | CB  | ASN | A | 165 | 4.468  | 24.707 | -1.575 | 1.00239.64 |       |       | C |
| ANISOU | 1150 | CB  | ASN | A | 165 | 38450  | 27239  | 25362  | -4428      | 720   | 3011  | C |
| ATOM   | 1151 | CG  | ASN | A | 165 | 3.889  | 25.397 | -2.794 | 1.00257.47 |       |       | C |
| ANISOU | 1151 | CG  | ASN | A | 165 | 42110  | 28957  | 26760  | -4003      | 489   | 3032  | C |
| ATOM   | 1152 | OD1 | ASN | A | 165 | 2.835  | 25.012 | -3.298 | 1.00260.08 |       |       | O |
| ANISOU | 1152 | OD1 | ASN | A | 165 | 42918  | 29226  | 26675  | -3335      | -44   | 2506  | O |
| ATOM   | 1153 | ND2 | ASN | A | 165 | 4.578  | 26.426 | -3.275 | 1.00270.23 |       |       | N |

|        |      |     |     |   |     |        |        |        |            |      |      |   |
|--------|------|-----|-----|---|-----|--------|--------|--------|------------|------|------|---|
| ANISOU | 1153 | ND2 | ASN | A | 165 | 44406  | 30169  | 28100  | -4398      | 876  | 3641 | N |
| ATOM   | 1154 | N   | TRP | A | 166 | 3.964  | 21.626 | 0.410  | 1.00202.86 |      |      | N |
| ANISOU | 1154 | N   | TRP | A | 166 | 31325  | 23789  | 21962  | -4062      | 650  | 2041 | N |
| ATOM   | 1155 | CA  | TRP | A | 166 | 4.637  | 20.803 | 1.408  | 1.00197.00 |      |      | C |
| ANISOU | 1155 | CA  | TRP | A | 166 | 29476  | 23517  | 21857  | -4306      | 989  | 2160 | C |
| ATOM   | 1156 | C   | TRP | A | 166 | 5.074  | 19.471 | 0.816  | 1.00194.02 |      |      | C |
| ANISOU | 1156 | C   | TRP | A | 166 | 28898  | 23411  | 21410  | -3966      | 1681 | 2206 | C |
| ATOM   | 1157 | O   | TRP | A | 166 | 4.270  | 18.742 | 0.236  | 1.00194.32 |      |      | O |
| ANISOU | 1157 | O   | TRP | A | 166 | 29329  | 23362  | 21142  | -3468      | 1555 | 1738 | O |
| ATOM   | 1158 | CB  | TRP | A | 166 | 3.747  | 20.563 | 2.628  | 1.00194.54 |      |      | C |
| ANISOU | 1158 | CB  | TRP | A | 166 | 28638  | 23310  | 21969  | -4271      | 338  | 1633 | C |
| ATOM   | 1159 | CG  | TRP | A | 166 | 4.392  | 19.674 | 3.651  | 1.00197.12 |      |      | C |
| ANISOU | 1159 | CG  | TRP | A | 166 | 27948  | 24087  | 22861  | -4448      | 654  | 1771 | C |
| ATOM   | 1160 | CD1 | TRP | A | 166 | 5.379  | 20.017 | 4.529  | 1.00204.52 |      |      | C |
| ANISOU | 1160 | CD1 | TRP | A | 166 | 28214  | 25276  | 24221  | -4949      | 792  | 2204 | C |
| ATOM   | 1161 | CD2 | TRP | A | 166 | 4.100  | 18.292 | 3.898  | 1.00192.72 |      |      | C |
| ANISOU | 1161 | CD2 | TRP | A | 166 | 26975  | 23759  | 22491  | -4107      | 839  | 1478 | C |
| ATOM   | 1162 | NE1 | TRP | A | 166 | 5.717  | 18.937 | 5.308  | 1.00201.91 |      |      | N |
| ANISOU | 1162 | NE1 | TRP | A | 166 | 27089  | 25341  | 24289  | -4873      | 1018 | 2221 | N |
| ATOM   | 1163 | CE2 | TRP | A | 166 | 4.947  | 17.866 | 4.940  | 1.00193.90 |      |      | C |
| ANISOU | 1163 | CE2 | TRP | A | 166 | 26250  | 24283  | 23139  | -4364      | 1087 | 1798 | C |
| ATOM   | 1164 | CE3 | TRP | A | 166 | 3.203  | 17.376 | 3.338  | 1.00185.85 |      |      | C |
| ANISOU | 1164 | CE3 | TRP | A | 166 | 26413  | 22786  | 21414  | -3625      | 797  | 963  | C |
| ATOM   | 1165 | CZ2 | TRP | A | 166 | 4.924  | 16.564 | 5.436  | 1.00184.10 |      |      | C |
| ANISOU | 1165 | CZ2 | TRP | A | 166 | 24511  | 23270  | 22168  | -4111      | 1331 | 1670 | C |
| ATOM   | 1166 | CZ3 | TRP | A | 166 | 3.183  | 16.084 | 3.832  | 1.00178.59 |      |      | C |
| ANISOU | 1166 | CZ3 | TRP | A | 166 | 24975  | 22073  | 20810  | -3455      | 1071 | 806  | C |
| ATOM   | 1167 | CH2 | TRP | A | 166 | 4.037  | 15.690 | 4.869  | 1.00178.00 |      |      | C |
| ANISOU | 1167 | CH2 | TRP | A | 166 | 24104  | 22324  | 21203  | -3676      | 1353 | 1183 | C |
| ATOM   | 1168 | N   | GLN | A | 167 | 6.357  | 19.161 | 0.969  | 1.00193.14 |      |      | N |
| ANISOU | 1168 | N   | GLN | A | 167 | 28156  | 23625  | 21604  | -4231      | 2400 | 2745 | N |
| ATOM   | 1169 | CA  | GLN | A | 167 | 6.909  | 17.916 | 0.457  | 1.00194.78 |      |      | C |
| ANISOU | 1169 | CA  | GLN | A | 167 | 28131  | 24085  | 21791  | -3880      | 3140 | 2838 | C |
| ATOM   | 1170 | C   | GLN | A | 167 | 7.361  | 17.022 | 1.603  | 1.00187.19 |      |      | C |
| ANISOU | 1170 | C   | GLN | A | 167 | 26091  | 23538  | 21493  | -3927      | 3264 | 2884 | C |
| ATOM   | 1171 | O   | GLN | A | 167 | 8.150  | 17.435 | 2.453  | 1.00181.07 |      |      | O |
| ANISOU | 1171 | O   | GLN | A | 167 | 24590  | 23026  | 21181  | -4370      | 3283 | 3260 | O |
| ATOM   | 1172 | CB  | GLN | A | 167 | 8.066  | 18.198 | -0.499 | 1.00204.57 |      |      | C |
| ANISOU | 1172 | CB  | GLN | A | 167 | 29575  | 25373  | 22780  | -4012      | 4004 | 3445 | C |
| ATOM   | 1173 | CG  | GLN | A | 167 | 7.644  | 18.911 | -1.774 | 1.00214.15 |      |      | C |
| ANISOU | 1173 | CG  | GLN | A | 167 | 32026  | 26146  | 23197  | -3857      | 3995 | 3437 | C |
| ATOM   | 1174 | CD  | GLN | A | 167 | 8.812  | 19.213 | -2.690 | 1.00233.30 |      |      | C |
| ANISOU | 1174 | CD  | GLN | A | 167 | 34678  | 28606  | 25358  | -4037      | 4963 | 4076 | C |
| ATOM   | 1175 | OE1 | GLN | A | 167 | 9.966  | 18.956 | -2.348 | 1.00242.61 |      |      | O |
| ANISOU | 1175 | OE1 | GLN | A | 167 | 34974  | 30174  | 27031  | -4316      | 5624 | 4519 | O |
| ATOM   | 1176 | NE2 | GLN | A | 167 | 8.518  | 19.763 | -3.862 | 1.00241.47 |      |      | N |
| ANISOU | 1176 | NE2 | GLN | A | 167 | 36896  | 29249  | 25603  | -3859      | 5059 | 4131 | N |
| ATOM   | 1177 | N   | SER | A | 168 | 6.850  | 15.796 | 1.618  | 1.00187.26 |      |      | N |
| ANISOU | 1177 | N   | SER | A | 168 | 26044  | 23579  | 21527  | -3469      | 3322 | 2491 | N |
| ATOM   | 1178 | CA  | SER | A | 168 | 7.104  | 14.862 | 2.709  | 1.00183.11 |      |      | C |
| ANISOU | 1178 | CA  | SER | A | 168 | 24659  | 23355  | 21560  | -3421      | 3391 | 2495 | C |
| ATOM   | 1179 | C   | SER | A | 168 | 8.540  | 14.344 | 2.725  | 1.00184.69 |      |      | C |
| ANISOU | 1179 | C   | SER | A | 168 | 24171  | 23941  | 22061  | -3401      | 4179 | 3081 | C |
| ATOM   | 1180 | O   | SER | A | 168 | 9.064  | 13.986 | 3.780  | 1.00176.91 |      |      | O |
| ANISOU | 1180 | O   | SER | A | 168 | 22357  | 23278  | 21582  | -3495      | 4160 | 3287 | O |
| ATOM   | 1181 | CB  | SER | A | 168 | 6.121  | 13.691 | 2.643  | 1.00178.96 |      |      | C |
| ANISOU | 1181 | CB  | SER | A | 168 | 24370  | 22657  | 20968  | -2966      | 3287 | 1904 | C |
| ATOM   | 1182 | OG  | SER | A | 168 | 6.123  | 13.096 | 1.356  | 1.00183.74 |      |      | O |
| ANISOU | 1182 | OG  | SER | A | 168 | 25601  | 23094  | 21118  | -2555      | 3766 | 1784 | O |
| ATOM   | 1183 | N   | GLN | A | 169 | 9.172  | 14.304 | 1.556  | 1.00193.36 |      |      | N |
| ANISOU | 1183 | N   | GLN | A | 169 | 25616  | 25023  | 22829  | -3241      | 4872 | 3346 | N |
| ATOM   | 1184 | CA  | GLN | A | 169 | 10.538 | 13.801 | 1.457  | 1.00209.74 |      |      | C |
| ANISOU | 1184 | CA  | GLN | A | 169 | 27003  | 27487  | 25200  | -3158      | 5705 | 3879 | C |
| ATOM   | 1185 | C   | GLN | A | 169 | 11.531 | 14.738 | 2.142  | 1.00222.90 |      |      | C |
| ANISOU | 1185 | C   | GLN | A | 169 | 27867  | 29502  | 27322  | -3766      | 5675 | 4410 | C |
| ATOM   | 1186 | O   | GLN | A | 169 | 12.555 | 14.294 | 2.661  | 1.00231.89 |      |      | O |
| ANISOU | 1186 | O   | GLN | A | 169 | 28063  | 31087  | 28959  | -3756      | 6039 | 4781 | O |
| ATOM   | 1187 | CB  | GLN | A | 169 | 10.934 | 13.562 | -0.005 | 1.00225.07 |      |      | C |
| ANISOU | 1187 | CB  | GLN | A | 169 | 29573  | 29318  | 26627  | -2831      | 6528 | 4005 | C |
| ATOM   | 1188 | CG  | GLN | A | 169 | 11.008 | 14.814 | -0.869 | 1.00236.66 |      |      | C |

|        |      |     |     |   |     |        |        |        |            |      |      |   |
|--------|------|-----|-----|---|-----|--------|--------|--------|------------|------|------|---|
| ANISOU | 1188 | CG  | GLN | A | 169 | 31726  | 30575  | 27619  | -3190      | 6602 | 4223 | C |
| ATOM   | 1189 | CD  | GLN | A | 169 | 9.655  | 15.254 | -1.395 | 1.00233.00 |      |      | C |
| ANISOU | 1189 | CD  | GLN | A | 169 | 32379  | 29616  | 26537  | -3075      | 5919 | 3701 | C |
| ATOM   | 1190 | OE1 | GLN | A | 169 | 8.611  | 14.837 | -0.892 | 1.00222.83 |      |      | O |
| ANISOU | 1190 | OE1 | GLN | A | 169 | 31173  | 28185  | 25307  | -2891      | 5250 | 3158 | O |
| ATOM   | 1191 | NE2 | GLN | A | 169 | 9.669  | 16.098 | -2.421 | 1.00237.96 |      |      | N |
| ANISOU | 1191 | NE2 | GLN | A | 169 | 33868  | 29980  | 26566  | -3170      | 6097 | 3870 | N |
| ATOM   | 1192 | N   | GLU | A | 170 | 11.221 | 16.031 | 2.146  | 1.00224.26 |      |      | N |
| ANISOU | 1192 | N   | GLU | A | 170 | 28417  | 29455  | 27336  | -4285      | 5207 | 4423 | N |
| ATOM   | 1193 | CA  | GLU | A | 170 | 12.059 | 17.013 | 2.824  | 1.00223.79 |      |      | C |
| ANISOU | 1193 | CA  | GLU | A | 170 | 27682  | 29641  | 27706  | -4965      | 5078 | 4843 | C |
| ATOM   | 1194 | C   | GLU | A | 170 | 11.769 | 17.030 | 4.321  | 1.00226.25 |      |      | C |
| ANISOU | 1194 | C   | GLU | A | 170 | 27378  | 30125  | 28462  | -5162      | 4297 | 4661 | C |
| ATOM   | 1195 | O   | GLU | A | 170 | 12.668 | 16.838 | 5.140  | 1.00233.51 |      |      | O |
| ANISOU | 1195 | O   | GLU | A | 170 | 27315  | 31505  | 29901  | -5339      | 4344 | 4964 | O |
| ATOM   | 1196 | CB  | GLU | A | 170 | 11.853 | 18.409 | 2.229  | 1.00212.38 |      |      | C |
| ANISOU | 1196 | CB  | GLU | A | 170 | 27002  | 27796  | 25898  | -5450      | 4917 | 4936 | C |
| ATOM   | 1197 | CG  | GLU | A | 170 | 12.394 | 18.575 | 0.819  | 1.00214.58 |      |      | C |
| ANISOU | 1197 | CG  | GLU | A | 170 | 27844  | 27947  | 25738  | -5388      | 5786 | 5268 | C |
| ATOM   | 1198 | CD  | GLU | A | 170 | 12.304 | 20.007 | 0.325  | 1.00220.15 |      |      | C |
| ANISOU | 1198 | CD  | GLU | A | 170 | 29312  | 28222  | 26115  | -5921      | 5660 | 5458 | C |
| ATOM   | 1199 | OE1 | GLU | A | 170 | 11.625 | 20.822 | 0.984  | 1.00213.36 |      |      | O |
| ANISOU | 1199 | OE1 | GLU | A | 170 | 28685  | 27087  | 25296  | -6223      | 4825 | 5228 | O |
| ATOM   | 1200 | OE2 | GLU | A | 170 | 12.915 | 20.319 | -0.719 | 1.00231.33 |      |      | O |
| ANISOU | 1200 | OE2 | GLU | A | 170 | 31137  | 29544  | 27214  | -6024      | 6435 | 5846 | O |
| ATOM   | 1201 | N   | ILE | A | 171 | 10.508 | 17.260 | 4.672  | 1.00214.87 |      |      | N |
| ANISOU | 1201 | N   | ILE | A | 171 | 26516  | 28332  | 26794  | -5104      | 3576 | 4156 | N |
| ATOM   | 1202 | CA  | ILE | A | 171 | 10.093 | 17.266 | 6.069  | 1.00195.70 |      |      | C |
| ANISOU | 1202 | CA  | ILE | A | 171 | 23651  | 26020  | 24685  | -5249      | 2876 | 3930 | C |
| ATOM   | 1203 | C   | ILE | A | 171 | 9.192  | 16.073 | 6.363  | 1.00185.23 |      |      | C |
| ANISOU | 1203 | C   | ILE | A | 171 | 22442  | 24627  | 23311  | -4690      | 2763 | 3487 | C |
| ATOM   | 1204 | O   | ILE | A | 171 | 8.101  | 15.956 | 5.804  | 1.00178.05 |      |      | O |
| ANISOU | 1204 | O   | ILE | A | 171 | 22264  | 23347  | 22040  | -4423      | 2589 | 3028 | O |
| ATOM   | 1205 | CB  | ILE | A | 171 | 9.336  | 18.556 | 6.436  | 1.00182.16 |      |      | C |
| ANISOU | 1205 | CB  | ILE | A | 171 | 22429  | 23957  | 22826  | -5679      | 2135 | 3675 | C |
| ATOM   | 1206 | CG1 | ILE | A | 171 | 10.048 | 19.782 | 5.862  | 1.00172.42 |      |      | C |
| ANISOU | 1206 | CG1 | ILE | A | 171 | 21392  | 22590  | 21529  | -6230      | 2308 | 4067 | C |
| ATOM   | 1207 | CG2 | ILE | A | 171 | 9.197  | 18.675 | 7.943  | 1.00186.56 |      |      | C |
| ANISOU | 1207 | CG2 | ILE | A | 171 | 22448  | 24711  | 23724  | -5915      | 1514 | 3538 | C |
| ATOM   | 1208 | CD1 | ILE | A | 171 | 9.369  | 21.092 | 6.206  | 1.00157.42 |      |      | C |
| ANISOU | 1208 | CD1 | ILE | A | 171 | 20052  | 20269  | 19492  | -6631      | 1603 | 3842 | C |
| ATOM   | 1209 | N   | THR | A | 172 | 9.652  | 15.191 | 7.243  | 1.00184.51 |      |      | N |
| ANISOU | 1209 | N   | THR | A | 172 | 21631  | 24884  | 23592  | -4519      | 2850 | 3625 | N |
| ATOM   | 1210 | CA  | THR | A | 172 | 8.881  | 14.010 | 7.607  | 1.00179.69 |      |      | C |
| ANISOU | 1210 | CA  | THR | A | 172 | 21121  | 24170  | 22982  | -4045      | 2822 | 3262 | C |
| ATOM   | 1211 | C   | THR | A | 172 | 7.650  | 14.407 | 8.414  | 1.00169.75 |      |      | C |
| ANISOU | 1211 | C   | THR | A | 172 | 20157  | 22680  | 21659  | -4207      | 2097 | 2765 | C |
| ATOM   | 1212 | O   | THR | A | 172 | 7.615  | 15.479 | 9.018  | 1.00164.66 |      |      | O |
| ANISOU | 1212 | O   | THR | A | 172 | 19444  | 22060  | 21060  | -4652      | 1593 | 2779 | O |
| ATOM   | 1213 | CB  | THR | A | 172 | 9.722  | 13.018 | 8.435  | 1.00178.17 |      |      | C |
| ANISOU | 1213 | CB  | THR | A | 172 | 20140  | 24372  | 23182  | -3799      | 3075 | 3598 | C |
| ATOM   | 1214 | OG1 | THR | A | 172 | 9.804  | 13.468 | 9.793  | 1.00171.59 |      |      | O |
| ANISOU | 1214 | OG1 | THR | A | 172 | 18846  | 23769  | 22581  | -4133      | 2484 | 3665 | O |
| ATOM   | 1215 | CG2 | THR | A | 172 | 11.124 | 12.893 | 7.855  | 1.00180.79 |      |      | C |
| ANISOU | 1215 | CG2 | THR | A | 172 | 19932  | 25059  | 23701  | -3727      | 3720 | 4151 | C |
| ATOM   | 1216 | N   | PHE | A | 173 | 6.641  | 13.541 | 8.415  | 1.00163.44 |      |      | N |
| ANISOU | 1216 | N   | PHE | A | 173 | 19683  | 21644  | 20773  | -3860      | 2078 | 2305 | N |
| ATOM   | 1217 | CA  | PHE | A | 173 | 5.435  | 13.771 | 9.199  | 1.00159.37 |      |      | C |
| ANISOU | 1217 | CA  | PHE | A | 173 | 19361  | 20944  | 20249  | -3971      | 1500 | 1804 | C |
| ATOM   | 1218 | C   | PHE | A | 173 | 5.801  | 13.790 | 10.677 | 1.00165.46 |      |      | C |
| ANISOU | 1218 | C   | PHE | A | 173 | 19563  | 22006  | 21296  | -4174      | 1242 | 2011 | C |
| ATOM   | 1219 | O   | PHE | A | 173 | 5.203  | 14.517 | 11.470 | 1.00163.03 |      |      | O |
| ANISOU | 1219 | O   | PHE | A | 173 | 19315  | 21653  | 20976  | -4445      | 712  | 1769 | O |
| ATOM   | 1220 | CB  | PHE | A | 173 | 4.405  | 12.670 | 8.927  | 1.00157.29 |      |      | C |
| ANISOU | 1220 | CB  | PHE | A | 173 | 19425  | 20408  | 19930  | -3601      | 1646 | 1298 | C |
| ATOM   | 1221 | CG  | PHE | A | 173 | 2.998  | 13.034 | 9.325  | 1.00158.08 |      |      | C |
| ANISOU | 1221 | CG  | PHE | A | 173 | 19801  | 20278  | 19984  | -3705      | 1108 | 679  | C |
| ATOM   | 1222 | CD1 | PHE | A | 173 | 2.081  | 13.448 | 8.373  | 1.00159.63 |      |      | C |
| ANISOU | 1222 | CD1 | PHE | A | 173 | 20545  | 20193  | 19915  | -3617      | 856  | 209  | C |
| ATOM   | 1223 | CD2 | PHE | A | 173 | 2.590  | 12.953 | 10.646 | 1.00161.72 |      |      | C |

|        |      |     |     |   |     |        |        |        |            |       |      |   |
|--------|------|-----|-----|---|-----|--------|--------|--------|------------|-------|------|---|
| ANISOU | 1223 | CD2 | PHE | A | 173 | 19972  | 20823  | 20651  | -3852      | 861   | 560  | C |
| ATOM   | 1224 | CE1 | PHE | A | 173 | 0.787  | 13.779 | 8.729  | 1.00154.71 |       |      | C |
| ANISOU | 1224 | CE1 | PHE | A | 173 | 20069  | 19405  | 19309  | -3664      | 360   | -384 | C |
| ATOM   | 1225 | CE2 | PHE | A | 173 | 1.297  | 13.284 | 11.007 | 1.00163.58 |       |      | C |
| ANISOU | 1225 | CE2 | PHE | A | 173 | 20399  | 20876  | 20877  | -3929      | 448   | -25  | C |
| ATOM   | 1226 | CZ  | PHE | A | 173 | 0.395  | 13.698 | 10.047 | 1.00158.02 |       |      | C |
| ANISOU | 1226 | CZ  | PHE | A | 173 | 20135  | 19921  | 19985  | -3830      | 193   | -507 | C |
| ATOM   | 1227 | N   | ASP | A | 174 | 6.798  | 12.988 | 11.036 | 1.00174.06 |       |      | N |
| ANISOU | 1227 | N   | ASP | A | 174 | 20130  | 23399  | 22605  | -3994      | 1611  | 2456 | N |
| ATOM   | 1228 | CA  | ASP | A | 174 | 7.238  | 12.876 | 12.420 | 1.00175.82 |       |      | C |
| ANISOU | 1228 | CA  | ASP | A | 174 | 19836  | 23936  | 23033  | -4097      | 1354  | 2696 | C |
| ATOM   | 1229 | C   | ASP | A | 174 | 7.915  | 14.156 | 12.898 | 1.00164.67 |       |      | C |
| ANISOU | 1229 | C   | ASP | A | 174 | 18099  | 22783  | 21684  | -4614      | 904   | 2941 | C |
| ATOM   | 1230 | O   | ASP | A | 174 | 7.692  | 14.595 | 14.025 | 1.00159.90 |       |      | O |
| ANISOU | 1230 | O   | ASP | A | 174 | 17401  | 22270  | 21082  | -4856      | 401   | 2845 | O |
| ATOM   | 1231 | CB  | ASP | A | 174 | 8.177  | 11.680 | 12.583 | 1.00189.16 |       |      | C |
| ANISOU | 1231 | CB  | ASP | A | 174 | 21062  | 25879  | 24932  | -3675      | 1837  | 3131 | C |
| ATOM   | 1232 | CG  | ASP | A | 174 | 7.551  | 10.383 | 12.106 | 1.00187.05 |       |      | C |
| ANISOU | 1232 | CG  | ASP | A | 174 | 21182  | 25271  | 24616  | -3191      | 2315  | 2881 | C |
| ATOM   | 1233 | OD1 | ASP | A | 174 | 6.896  | 9.701  | 12.923 | 1.00173.51 |       |      | O |
| ANISOU | 1233 | OD1 | ASP | A | 174 | 19595  | 23409  | 22923  | -3066      | 2250  | 2690 | O |
| ATOM   | 1234 | OD2 | ASP | A | 174 | 7.711  | 10.048 | 10.913 | 1.00192.62 |       |      | O |
| ANISOU | 1234 | OD2 | ASP | A | 174 | 22109  | 25832  | 25244  | -2958      | 2780  | 2865 | O |
| ATOM   | 1235 | N   | GLU | A | 175 | 8.736  | 14.751 | 12.037 | 1.00162.98 |       |      | N |
| ANISOU | 1235 | N   | GLU | A | 175 | 17755  | 22663  | 21508  | -4807      | 1116  | 3242 | N |
| ATOM   | 1236 | CA  | GLU | A | 175 | 9.396  | 16.015 | 12.352 | 1.00168.68 |       |      | C |
| ANISOU | 1236 | CA  | GLU | A | 175 | 18208  | 23557  | 22326  | -5391      | 739   | 3457 | C |
| ATOM   | 1237 | C   | GLU | A | 175 | 8.382  | 17.098 | 12.699 | 1.00168.75 |       |      | C |
| ANISOU | 1237 | C   | GLU | A | 175 | 18775  | 23220  | 22124  | -5732      | 133   | 3014 | C |
| ATOM   | 1238 | O   | GLU | A | 175 | 8.642  | 17.955 | 13.544 | 1.00168.32 |       |      | O |
| ANISOU | 1238 | O   | GLU | A | 175 | 18538  | 23275  | 22139  | -6175      | -362  | 3045 | O |
| ATOM   | 1239 | CB  | GLU | A | 175 | 10.269 | 16.478 | 11.185 | 1.00175.61 |       |      | C |
| ANISOU | 1239 | CB  | GLU | A | 175 | 19001  | 24477  | 23248  | -5570      | 1194  | 3808 | C |
| ATOM   | 1240 | CG  | GLU | A | 175 | 11.587 | 15.740 | 11.055 | 1.00181.72 |       |      | C |
| ANISOU | 1240 | CG  | GLU | A | 175 | 18976  | 25727  | 24343  | -5371      | 1726  | 4327 | C |
| ATOM   | 1241 | CD  | GLU | A | 175 | 12.382 | 16.188 | 9.846  | 1.00187.00 |       |      | C |
| ANISOU | 1241 | CD  | GLU | A | 175 | 19594  | 26422  | 25035  | -5553      | 2302  | 4651 | C |
| ATOM   | 1242 | OE1 | GLU | A | 175 | 11.852 | 16.987 | 9.047  | 1.00187.36 |       |      | O |
| ANISOU | 1242 | OE1 | GLU | A | 175 | 20355  | 26059  | 24774  | -5780      | 2300  | 4483 | O |
| ATOM   | 1243 | OE2 | GLU | A | 175 | 13.538 | 15.741 | 9.694  | 1.00192.40 |       |      | O |
| ANISOU | 1243 | OE2 | GLU | A | 175 | 19534  | 27537  | 26034  | -5443      | 2776  | 5083 | O |
| ATOM   | 1244 | N   | ILE | A | 176 | 7.229  | 17.053 | 12.039 | 1.00169.15 |       |      | N |
| ANISOU | 1244 | N   | ILE | A | 176 | 19498  | 22854  | 21918  | -5501      | 153   | 2574 | N |
| ATOM   | 1245 | CA  | ILE | A | 176 | 6.147  | 17.987 | 12.318 | 1.00165.13 |       |      | C |
| ANISOU | 1245 | CA  | ILE | A | 176 | 19514  | 22004  | 21222  | -5684      | -398  | 2101 | C |
| ATOM   | 1246 | C   | ILE | A | 176 | 5.641  | 17.787 | 13.738 | 1.00158.45 |       |      | C |
| ANISOU | 1246 | C   | ILE | A | 176 | 18497  | 21272  | 20434  | -5696      | -776  | 1856 | C |
| ATOM   | 1247 | O   | ILE | A | 176 | 5.466  | 18.744 | 14.492 | 1.00160.86 |       |      | O |
| ANISOU | 1247 | O   | ILE | A | 176 | 18892  | 21527  | 20700  | -6034      | -1278 | 1710 | O |
| ATOM   | 1248 | CB  | ILE | A | 176 | 4.961  | 17.776 | 11.365 | 1.00156.26 |       |      | C |
| ANISOU | 1248 | CB  | ILE | A | 176 | 19032  | 20487  | 19851  | -5325      | -329  | 1635 | C |
| ATOM   | 1249 | CG1 | ILE | A | 176 | 5.431  | 17.763 | 9.911  | 1.00153.60 |       |      | C |
| ANISOU | 1249 | CG1 | ILE | A | 176 | 18970  | 20041  | 19350  | -5207      | 120   | 1874 | C |
| ATOM   | 1250 | CG2 | ILE | A | 176 | 3.911  | 18.851 | 11.586 | 1.00154.25 |       |      | C |
| ANISOU | 1250 | CG2 | ILE | A | 176 | 19270  | 19902  | 19438  | -5460      | -915  | 1169 | C |
| ATOM   | 1251 | CD1 | ILE | A | 176 | 5.923  | 19.095 | 9.424  | 1.00156.50 |       |      | C |
| ANISOU | 1251 | CD1 | ILE | A | 176 | 19609  | 20250  | 19603  | -5619      | -14   | 2122 | C |
| ATOM   | 1252 | N   | LEU | A | 177 | 5.404  | 16.530 | 14.091 | 1.00149.12 |       |      | N |
| ANISOU | 1252 | N   | LEU | A | 177 | 17137  | 20206  | 19317  | -5321      | -494  | 1812 | N |
| ATOM   | 1253 | CA  | LEU | A | 177 | 4.906  | 16.186 | 15.413 | 1.00147.37 |       |      | C |
| ANISOU | 1253 | CA  | LEU | A | 177 | 16824  | 20075  | 19096  | -5289      | -727  | 1619 | C |
| ATOM   | 1254 | C   | LEU | A | 177 | 5.944  | 16.512 | 16.484 | 1.00150.07 |       |      | C |
| ANISOU | 1254 | C   | LEU | A | 177 | 16693  | 20808  | 19517  | -5567      | -1023 | 2010 | C |
| ATOM   | 1255 | O   | LEU | A | 177 | 5.597  | 16.949 | 17.581 | 1.00150.17 |       |      | O |
| ANISOU | 1255 | O   | LEU | A | 177 | 16780  | 20857  | 19420  | -5746      | -1446 | 1816 | O |
| ATOM   | 1256 | CB  | LEU | A | 177 | 4.516  | 14.708 | 15.460 | 1.00146.03 |       |      | C |
| ANISOU | 1256 | CB  | LEU | A | 177 | 16627  | 19875  | 18982  | -4846      | -268  | 1557 | C |
| ATOM   | 1257 | CG  | LEU | A | 177 | 3.499  | 14.281 | 14.396 | 1.00138.46 |       |      | C |
| ANISOU | 1257 | CG  | LEU | A | 177 | 16093  | 18549  | 17967  | -4596      | -11   | 1115 | C |
| ATOM   | 1258 | CD1 | LEU | A | 177 | 3.238  | 12.786 | 14.461 | 1.00136.84 |       |      | C |

|        |      |     |     |   |     |        |        |        |            |       |      |   |
|--------|------|-----|-----|---|-----|--------|--------|--------|------------|-------|------|---|
| ANISOU | 1258 | CD1 | LEU | A | 177 | 15862  | 18271  | 17862  | -4234      | 476   | 1076 | C |
| ATOM   | 1259 | CD2 | LEU | A | 177 | 2.198  | 15.061 | 14.539 | 1.00132.92 |       |      | C |
| ANISOU | 1259 | CD2 | LEU | A | 177 | 15763  | 17586  | 17154  | -4720      | -426  | 507  | C |
| ATOM   | 1260 | N   | GLN | A | 178 | 7.216  | 16.301 | 16.155 | 1.00153.91 |       |      | N |
| ANISOU | 1260 | N   | GLN | A | 178 | 16680  | 21609  | 20190  | -5591      | -806  | 2533 | N |
| ATOM   | 1261 | CA  | GLN | A | 178 | 8.312  | 16.662 | 17.048 | 1.00162.59 |       |      | C |
| ANISOU | 1261 | CA  | GLN | A | 178 | 17221  | 23139  | 21415  | -5883      | -1150 | 2901 | C |
| ATOM   | 1262 | C   | GLN | A | 178 | 8.258  | 18.151 | 17.347 | 1.00159.10 |       |      | C |
| ANISOU | 1262 | C   | GLN | A | 178 | 16972  | 22578  | 20901  | -6474      | -1719 | 2715 | C |
| ATOM   | 1263 | O   | GLN | A | 178 | 8.403  | 18.573 | 18.495 | 1.00154.51 |       |      | O |
| ANISOU | 1263 | O   | GLN | A | 178 | 16285  | 22170  | 20250  | -6721      | -2229 | 2663 | O |
| ATOM   | 1264 | CB  | GLN | A | 178 | 9.657  | 16.318 | 16.409 | 1.00179.00 |       |      | C |
| ANISOU | 1264 | CB  | GLN | A | 178 | 18662  | 25569  | 23779  | -5833      | -776  | 3449 | C |
| ATOM   | 1265 | CG  | GLN | A | 178 | 9.902  | 14.834 | 16.224 | 1.00187.35 |       |      | C |
| ANISOU | 1265 | CG  | GLN | A | 178 | 19490  | 26761  | 24933  | -5203      | -229  | 3684 | C |
| ATOM   | 1266 | CD  | GLN | A | 178 | 10.987 | 14.550 | 15.206 | 1.00192.52 |       |      | C |
| ANISOU | 1266 | CD  | GLN | A | 178 | 19670  | 27636  | 25841  | -5076      | 309   | 4111 | C |
| ATOM   | 1267 | OE1 | GLN | A | 178 | 11.645 | 15.466 | 14.713 | 1.00194.23 |       |      | O |
| ANISOU | 1267 | OE1 | GLN | A | 178 | 19649  | 27961  | 26187  | -5517      | 283   | 4280 | O |
| ATOM   | 1268 | NE2 | GLN | A | 178 | 11.174 | 13.277 | 14.880 | 1.00194.74 |       |      | N |
| ANISOU | 1268 | NE2 | GLN | A | 178 | 19843  | 27952  | 26199  | -4476      | 852   | 4281 | N |
| ATOM   | 1269 | N   | ALA | A | 179 | 8.049  | 18.940 | 16.299 | 1.00159.66 |       |      | N |
| ANISOU | 1269 | N   | ALA | A | 179 | 17402  | 22314  | 20949  | -6680      | -1628 | 2612 | N |
| ATOM   | 1270 | CA  | ALA | A | 179 | 7.900  | 20.380 | 16.439 | 1.00157.88 |       |      | C |
| ANISOU | 1270 | CA  | ALA | A | 179 | 17516  | 21828  | 20644  | -7207      | -2114 | 2416 | C |
| ATOM   | 1271 | C   | ALA | A | 179 | 6.594  | 20.693 | 17.154 | 1.00154.98 |       |      | C |
| ANISOU | 1271 | C   | ALA | A | 179 | 17704  | 21159  | 20022  | -7103      | -2495 | 1844 | C |
| ATOM   | 1272 | O   | ALA | A | 179 | 6.525  | 21.629 | 17.947 | 1.00162.38 |       |      | O |
| ANISOU | 1272 | O   | ALA | A | 179 | 18806  | 22016  | 20875  | -7465      | -3009 | 1654 | O |
| ATOM   | 1273 | CB  | ALA | A | 179 | 7.940  | 21.054 | 15.079 | 1.00152.40 |       |      | C |
| ANISOU | 1273 | CB  | ALA | A | 179 | 17188  | 20784  | 19931  | -7359      | -1859 | 2487 | C |
| ATOM   | 1274 | N   | TYR | A | 180 | 5.565  | 19.899 | 16.871 | 1.00141.38 |       |      | N |
| ANISOU | 1274 | N   | TYR | A | 180 | 16252  | 19270  | 18197  | -6616      | -2220 | 1544 | N |
| ATOM   | 1275 | CA  | TYR | A | 180 | 4.266  | 20.056 | 17.518 | 1.00130.91 |       |      | C |
| ANISOU | 1275 | CA  | TYR | A | 180 | 15343  | 17707  | 16689  | -6468      | -2469 | 979  | C |
| ATOM   | 1276 | C   | TYR | A | 180 | 4.384  | 19.859 | 19.024 | 1.00138.73 |       |      | C |
| ANISOU | 1276 | C   | TYR | A | 180 | 16136  | 18979  | 17596  | -6543      | -2729 | 964  | C |
| ATOM   | 1277 | O   | TYR | A | 180 | 3.820  | 20.623 | 19.804 | 1.00140.86 |       |      | O |
| ANISOU | 1277 | O   | TYR | A | 180 | 16715  | 19108  | 17696  | -6701      | -3126 | 603  | O |
| ATOM   | 1278 | CB  | TYR | A | 180 | 3.255  | 19.058 | 16.952 | 1.00121.52 |       |      | C |
| ANISOU | 1278 | CB  | TYR | A | 180 | 14319  | 16364  | 15491  | -5979      | -2070 | 686  | C |
| ATOM   | 1279 | CG  | TYR | A | 180 | 2.216  | 19.663 | 16.036 | 1.00127.36 |       |      | C |
| ANISOU | 1279 | CG  | TYR | A | 180 | 15573  | 16681  | 16136  | -5851      | -2174 | 238  | C |
| ATOM   | 1280 | CD1 | TYR | A | 180 | 1.147  | 20.387 | 16.549 | 1.00125.79 |       |      | C |
| ANISOU | 1280 | CD1 | TYR | A | 180 | 15711  | 16248  | 15834  | -5841      | -2549 | -293 | C |
| ATOM   | 1281 | CD2 | TYR | A | 180 | 2.293  | 19.496 | 14.659 | 1.00130.59 |       |      | C |
| ANISOU | 1281 | CD2 | TYR | A | 180 | 16149  | 16938  | 16532  | -5683      | -1906 | 336  | C |
| ATOM   | 1282 | CE1 | TYR | A | 180 | 0.190  | 20.937 | 15.715 | 1.00121.91 |       |      | C |
| ANISOU | 1282 | CE1 | TYR | A | 180 | 15654  | 15397  | 15270  | -5639      | -2708 | -706 | C |
| ATOM   | 1283 | CE2 | TYR | A | 180 | 1.340  | 20.043 | 13.816 | 1.00129.99 |       |      | C |
| ANISOU | 1283 | CE2 | TYR | A | 180 | 16580  | 16494  | 16316  | -5503      | -2084 | -68  | C |
| ATOM   | 1284 | CZ  | TYR | A | 180 | 0.291  | 20.762 | 14.349 | 1.00123.59 |       |      | C |
| ANISOU | 1284 | CZ  | TYR | A | 180 | 16043  | 15471  | 15446  | -5466      | -2512 | -584 | C |
| ATOM   | 1285 | OH  | TYR | A | 180 | -0.661 | 21.307 | 13.515 | 1.00116.48 |       |      | O |
| ANISOU | 1285 | OH  | TYR | A | 180 | 15609  | 14227  | 14419  | -5208      | -2751 | -989 | O |
| ATOM   | 1286 | N   | CYS | A | 181 | 5.121  | 18.828 | 19.424 | 1.00142.89 |       |      | N |
| ANISOU | 1286 | N   | CYS | A | 181 | 16197  | 19889  | 18204  | -6382      | -2501 | 1360 | N |
| ATOM   | 1287 | CA  | CYS | A | 181 | 5.291  | 18.515 | 20.837 | 1.00141.64 |       |      | C |
| ANISOU | 1287 | CA  | CYS | A | 181 | 15906  | 20019  | 17891  | -6376      | -2740 | 1413 | C |
| ATOM   | 1288 | C   | CYS | A | 181 | 6.051  | 19.609 | 21.581 | 1.00147.60 |       |      | C |
| ANISOU | 1288 | C   | CYS | A | 181 | 16555  | 20949  | 18576  | -6873      | -3363 | 1490 | C |
| ATOM   | 1289 | O   | CYS | A | 181 | 5.598  | 20.086 | 22.620 | 1.00153.99 |       |      | O |
| ANISOU | 1289 | O   | CYS | A | 181 | 17668  | 21722  | 19120  | -6992      | -3741 | 1181 | O |
| ATOM   | 1290 | CB  | CYS | A | 181 | 5.996  | 17.168 | 21.009 | 1.00141.74 |       |      | C |
| ANISOU | 1290 | CB  | CYS | A | 181 | 15476  | 20375  | 18002  | -6021      | -2384 | 1879 | C |
| ATOM   | 1291 | SG  | CYS | A | 181 | 5.005  | 15.742 | 20.505 | 1.00183.39 |       |      | S |
| ANISOU | 1291 | SG  | CYS | A | 181 | 20979  | 25387  | 23315  | -5471      | -1680 | 1716 | S |
| ATOM   | 1292 | N   | PHE | A | 182 | 7.202  | 20.003 | 21.041 | 1.00151.21 |       |      | N |
| ANISOU | 1292 | N   | PHE | A | 182 | 16585  | 21589  | 19277  | -7185      | -3440 | 1876 | N |
| ATOM   | 1293 | CA  | PHE | A | 182 | 8.028  | 21.035 | 21.660 | 1.00160.54 |       |      | C |



|        |      |     |     |   |     |        |        |        |            |       |       |   |
|--------|------|-----|-----|---|-----|--------|--------|--------|------------|-------|-------|---|
| ANISOU | 1293 | CA  | PHE | A | 182 | 17587  | 22937  | 20474  | -7754      | -4037 | 1947  | C |
| ATOM   | 1294 | C   | PHE | A | 182 | 7.244  | 22.329 | 21.844 | 1.00145.65 |       |       | C |
| ANISOU | 1294 | C   | PHE | A | 182 | 16366  | 20579  | 18396  | -8089      | -4427 | 1439  | C |
| ATOM   | 1295 | O   | PHE | A | 182 | 7.350  | 22.990 | 22.877 | 1.00144.77 |       |       | O |
| ANISOU | 1295 | O   | PHE | A | 182 | 16396  | 20515  | 18093  | -8396      | -4973 | 1245  | O |
| ATOM   | 1296 | CB  | PHE | A | 182 | 9.281  | 21.299 | 20.823 | 1.00181.01 |       |       | C |
| ANISOU | 1296 | CB  | PHE | A | 182 | 19598  | 25731  | 23446  | -8094      | -3924 | 2405  | C |
| ATOM   | 1297 | CG  | PHE | A | 182 | 10.253 | 22.246 | 21.470 | 1.00197.93 |       |       | C |
| ANISOU | 1297 | CG  | PHE | A | 182 | 21407  | 28103  | 25695  | -8748      | -4533 | 2495  | C |
| ATOM   | 1298 | CD1 | PHE | A | 182 | 11.199 | 21.780 | 22.369 | 1.00208.70 |       |       | C |
| ANISOU | 1298 | CD1 | PHE | A | 182 | 22110  | 30064  | 27121  | -8756      | -4865 | 2775  | C |
| ATOM   | 1299 | CD2 | PHE | A | 182 | 10.223 | 23.601 | 21.180 | 1.00195.53 |       |       | C |
| ANISOU | 1299 | CD2 | PHE | A | 182 | 21516  | 27364  | 25414  | -9236      | -4748 | 2266  | C |
| ATOM   | 1300 | CE1 | PHE | A | 182 | 12.096 | 22.646 | 22.967 | 1.00211.34 |       |       | C |
| ANISOU | 1300 | CE1 | PHE | A | 182 | 22191  | 30561  | 27548  | -9208      | -5385 | 2758  | C |
| ATOM   | 1301 | CE2 | PHE | A | 182 | 11.116 | 24.471 | 21.776 | 1.00200.78 |       |       | C |
| ANISOU | 1301 | CE2 | PHE | A | 182 | 22012  | 28107  | 26169  | -9587      | -5138 | 2244  | C |
| ATOM   | 1302 | CZ  | PHE | A | 182 | 12.054 | 23.993 | 22.670 | 1.00208.25 |       |       | C |
| ANISOU | 1302 | CZ  | PHE | A | 182 | 22282  | 29655  | 27190  | -9587      | -5460 | 2460  | C |
| ATOM   | 1303 | N   | ILE | A | 183 | 6.458  | 22.679 | 20.831 | 1.00137.05 |       |       | N |
| ANISOU | 1303 | N   | ILE | A | 183 | 15718  | 19023  | 17332  | -7984      | -4167 | 1211  | N |
| ATOM   | 1304 | CA  | ILE | A | 183 | 5.601  | 23.857 | 20.882 | 1.00145.17 |       |       | C |
| ANISOU | 1304 | CA  | ILE | A | 183 | 17429  | 19539  | 18190  | -8156      | -4491 | 719   | C |
| ATOM   | 1305 | C   | ILE | A | 183 | 4.546  | 23.711 | 21.976 | 1.00152.88 |       |       | C |
| ANISOU | 1305 | C   | ILE | A | 183 | 18755  | 20470  | 18862  | -7876      | -4646 | 234   | C |
| ATOM   | 1306 | O   | ILE | A | 183 | 4.252  | 24.661 | 22.700 | 1.00165.52 |       |       | O |
| ANISOU | 1306 | O   | ILE | A | 183 | 20764  | 21850  | 20274  | -8010      | -5024 | -117  | O |
| ATOM   | 1307 | CB  | ILE | A | 183 | 4.928  | 24.111 | 19.517 | 1.00144.40 |       |       | C |
| ANISOU | 1307 | CB  | ILE | A | 183 | 17729  | 18986  | 18150  | -7955      | -4186 | 599   | C |
| ATOM   | 1308 | CG1 | ILE | A | 183 | 5.952  | 24.640 | 18.511 | 1.00142.30 |       |       | C |
| ANISOU | 1308 | CG1 | ILE | A | 183 | 17320  | 18648  | 18099  | -8359      | -4069 | 1038  | C |
| ATOM   | 1309 | CG2 | ILE | A | 183 | 3.783  | 25.095 | 19.649 | 1.00141.11 |       |       | C |
| ANISOU | 1309 | CG2 | ILE | A | 183 | 18026  | 18050  | 17538  | -7892      | -4495 | 27    | C |
| ATOM   | 1310 | CD1 | ILE | A | 183 | 5.406  | 24.799 | 17.111 | 1.00140.11 |       |       | C |
| ANISOU | 1310 | CD1 | ILE | A | 183 | 17487  | 17957  | 17791  | -8116      | -3747 | 1003  | C |
| ATOM   | 1311 | N   | LEU | A | 184 | 3.989  | 22.512 | 22.101 | 1.00146.48 |       |       | N |
| ANISOU | 1311 | N   | LEU | A | 184 | 17812  | 19833  | 18012  | -7390      | -4236 | 213   | N |
| ATOM   | 1312 | CA  | LEU | A | 184 | 3.007  | 22.235 | 23.143 | 1.00141.95 |       |       | C |
| ANISOU | 1312 | CA  | LEU | A | 184 | 17522  | 19250  | 17162  | -7134      | -4239 | -200  | C |
| ATOM   | 1313 | C   | LEU | A | 184 | 3.659  | 22.185 | 24.523 | 1.00140.38 |       |       | C |
| ANISOU | 1313 | C   | LEU | A | 184 | 17221  | 19416  | 16701  | -7313      | -4592 | -63   | C |
| ATOM   | 1314 | O   | LEU | A | 184 | 3.073  | 22.623 | 25.512 | 1.00126.88 |       |       | O |
| ANISOU | 1314 | O   | LEU | A | 184 | 15915  | 17624  | 14669  | -7328      | -4825 | -455  | O |
| ATOM   | 1315 | CB  | LEU | A | 184 | 2.268  | 20.925 | 22.859 | 1.00135.02 |       |       | C |
| ANISOU | 1315 | CB  | LEU | A | 184 | 16532  | 18415  | 16354  | -6643      | -3645 | -236  | C |
| ATOM   | 1316 | CG  | LEU | A | 184 | 1.283  | 20.917 | 21.687 | 1.00127.91 |       |       | C |
| ANISOU | 1316 | CG  | LEU | A | 184 | 15817  | 17156  | 15627  | -6391      | -3364 | -559  | C |
| ATOM   | 1317 | CD1 | LEU | A | 184 | 0.651  | 19.543 | 21.531 | 1.00121.27 |       |       | C |
| ANISOU | 1317 | CD1 | LEU | A | 184 | 14819  | 16379  | 14879  | -5999      | -2803 | -608  | C |
| ATOM   | 1318 | CD2 | LEU | A | 184 | 0.216  | 21.983 | 21.865 | 1.00129.40 |       |       | C |
| ANISOU | 1318 | CD2 | LEU | A | 184 | 16482  | 16985  | 15699  | -6381      | -3650 | -1165 | C |
| ATOM   | 1319 | N   | GLU | A | 185 | 4.874  | 21.650 | 24.583 | 1.00149.08 |       |       | N |
| ANISOU | 1319 | N   | GLU | A | 185 | 17786  | 20935  | 17921  | -7410      | -4641 | 480   | N |
| ATOM   | 1320 | CA  | GLU | A | 185 | 5.597  | 21.528 | 25.844 | 1.00161.12 |       |       | C |
| ANISOU | 1320 | CA  | GLU | A | 185 | 19163  | 22872  | 19183  | -7529      | -5060 | 655   | C |
| ATOM   | 1321 | C   | GLU | A | 185 | 5.897  | 22.887 | 26.466 | 1.00161.32 |       |       | C |
| ANISOU | 1321 | C   | GLU | A | 185 | 19455  | 22802  | 19037  | -8064      | -5754 | 385   | C |
| ATOM   | 1322 | O   | GLU | A | 185 | 5.935  | 23.025 | 27.689 | 1.00172.49 |       |       | O |
| ANISOU | 1322 | O   | GLU | A | 185 | 21095  | 24391  | 20052  | -8116      | -6148 | 234   | O |
| ATOM   | 1323 | CB  | GLU | A | 185 | 6.904  | 20.755 | 25.642 | 1.00181.58 |       |       | C |
| ANISOU | 1323 | CB  | GLU | A | 185 | 21023  | 25949  | 22019  | -7491      | -5026 | 1291  | C |
| ATOM   | 1324 | CG  | GLU | A | 185 | 6.737  | 19.247 | 25.497 | 1.00195.17 |       |       | C |
| ANISOU | 1324 | CG  | GLU | A | 185 | 22560  | 27817  | 23780  | -6902      | -4430 | 1583  | C |
| ATOM   | 1325 | CD  | GLU | A | 185 | 6.507  | 18.544 | 26.824 | 1.00205.48 |       |       | C |
| ANISOU | 1325 | CD  | GLU | A | 185 | 24099  | 29329  | 24645  | -6600      | -4499 | 1603  | C |
| ATOM   | 1326 | OE1 | GLU | A | 185 | 6.524  | 19.221 | 27.874 | 1.00218.10 |       |       | O |
| ANISOU | 1326 | OE1 | GLU | A | 185 | 25982  | 31017  | 25869  | -6831      | -5038 | 1389  | O |
| ATOM   | 1327 | OE2 | GLU | A | 185 | 6.312  | 17.310 | 26.818 | 1.00197.78 |       |       | O |
| ANISOU | 1327 | OE2 | GLU | A | 185 | 23088  | 28393  | 23666  | -6131      | -3997 | 1836  | O |
| ATOM   | 1328 | N   | LYS | A | 186 | 6.101  | 23.891 | 25.621 | 1.00171.69 |       |       | N |

|        |      |     |     |   |     |        |        |        |            |       |      |   |
|--------|------|-----|-----|---|-----|--------|--------|--------|------------|-------|------|---|
| ANISOU | 1328 | N   | LYS | A | 186 | 21774  | 23812  | 19647  | -11686     | -3556 | 2299 | N |
| ATOM   | 1329 | CA  | LYS | A | 186 | 6.534  | 25.200 | 26.095 | 1.00184.16 |       |      | C |
| ANISOU | 1329 | CA  | LYS | A | 186 | 23558  | 25387  | 21025  | -12083     | -3674 | 2184 | C |
| ATOM   | 1330 | C   | LYS | A | 186 | 5.398  | 26.212 | 26.226 | 1.00178.74 |       |      | C |
| ANISOU | 1330 | C   | LYS | A | 186 | 23692  | 24305  | 19915  | -11985     | -3605 | 1836 | C |
| ATOM   | 1331 | O   | LYS | A | 186 | 5.421  | 27.064 | 27.113 | 1.00198.15 |       |      | O |
| ANISOU | 1331 | O   | LYS | A | 186 | 26397  | 26779  | 22112  | -12227     | -3789 | 1736 | O |
| ATOM   | 1332 | CB  | LYS | A | 186 | 7.637  | 25.753 | 25.190 | 1.00200.26 |       |      | C |
| ANISOU | 1332 | CB  | LYS | A | 186 | 25277  | 27443  | 23370  | -12422     | -3452 | 2259 | C |
| ATOM   | 1333 | CG  | LYS | A | 186 | 8.898  | 24.905 | 25.181 | 1.00220.87 |       |      | C |
| ANISOU | 1333 | CG  | LYS | A | 186 | 26967  | 30486  | 26468  | -12564     | -3516 | 2606 | C |
| ATOM   | 1334 | CD  | LYS | A | 186 | 9.491  | 24.790 | 26.577 | 1.00238.44 |       |      | C |
| ANISOU | 1334 | CD  | LYS | A | 186 | 28823  | 33128  | 28644  | -12789     | -4014 | 2758 | C |
| ATOM   | 1335 | CE  | LYS | A | 186 | 10.711 | 23.881 | 26.592 | 1.00251.49 |       |      | C |
| ANISOU | 1335 | CE  | LYS | A | 186 | 29501  | 35240  | 30815  | -12875     | -4129 | 3122 | C |
| ATOM   | 1336 | NZ  | LYS | A | 186 | 10.365 | 22.479 | 26.229 | 1.00251.84 |       |      | N |
| ANISOU | 1336 | NZ  | LYS | A | 186 | 29278  | 35344  | 31065  | -12441     | -4028 | 3337 | N |
| ATOM   | 1337 | N   | LEU | A | 187 | 4.408  | 26.124 | 25.345 | 1.00152.56 |       |      | N |
| ANISOU | 1337 | N   | LEU | A | 187 | 20785  | 20632  | 16549  | -11631     | -3344 | 1651 | N |
| ATOM   | 1338 | CA  | LEU | A | 187 | 3.286  | 27.056 | 25.384 | 1.00143.52 |       |      | C |
| ANISOU | 1338 | CA  | LEU | A | 187 | 20363  | 19103  | 15067  | -11483     | -3270 | 1331 | C |
| ATOM   | 1339 | C   | LEU | A | 187 | 2.361  | 26.783 | 26.561 | 1.00150.06 |       |      | C |
| ANISOU | 1339 | C   | LEU | A | 187 | 21382  | 19955  | 15680  | -11262     | -3433 | 1225 | C |
| ATOM   | 1340 | O   | LEU | A | 187 | 1.579  | 27.646 | 26.959 | 1.00148.64 |       |      | O |
| ANISOU | 1340 | O   | LEU | A | 187 | 21702  | 19531  | 15242  | -11212     | -3412 | 986  | O |
| ATOM   | 1341 | CB  | LEU | A | 187 | 2.493  | 27.006 | 24.080 | 1.00142.15 |       |      | C |
| ANISOU | 1341 | CB  | LEU | A | 187 | 20543  | 18547  | 14919  | -11165     | -2988 | 1170 | C |
| ATOM   | 1342 | CG  | LEU | A | 187 | 3.181  | 27.645 | 22.878 | 1.00154.74 |       |      | C |
| ANISOU | 1342 | CG  | LEU | A | 187 | 22227  | 19974  | 16591  | -11426     | -2755 | 1207 | C |
| ATOM   | 1343 | CD1 | LEU | A | 187 | 2.286  | 27.570 | 21.663 | 1.00155.02 |       |      | C |
| ANISOU | 1343 | CD1 | LEU | A | 187 | 22725  | 19607  | 16568  | -11107     | -2528 | 1044 | C |
| ATOM   | 1344 | CD2 | LEU | A | 187 | 3.542  | 29.082 | 23.190 | 1.00160.60 |       |      | C |
| ANISOU | 1344 | CD2 | LEU | A | 187 | 23295  | 20605  | 17119  | -11815     | -2789 | 1114 | C |
| ATOM   | 1345 | N   | LEU | A | 188 | 2.453  | 25.576 | 27.112 | 1.00154.05 |       |      | N |
| ANISOU | 1345 | N   | LEU | A | 188 | 21489  | 20737  | 16306  | -11144     | -3572 | 1414 | N |
| ATOM   | 1346 | CA  | LEU | A | 188 | 1.621  | 25.189 | 28.244 | 1.00149.78 |       |      | C |
| ANISOU | 1346 | CA  | LEU | A | 188 | 21121  | 20224  | 15565  | -10981     | -3691 | 1344 | C |
| ATOM   | 1347 | C   | LEU | A | 188 | 2.190  | 25.694 | 29.563 | 1.00155.00 |       |      | C |
| ANISOU | 1347 | C   | LEU | A | 188 | 21778  | 21129  | 15985  | -11371     | -3978 | 1439 | C |
| ATOM   | 1348 | O   | LEU | A | 188 | 1.640  | 25.426 | 30.631 | 1.00162.34 |       |      | O |
| ANISOU | 1348 | O   | LEU | A | 188 | 22872  | 22110  | 16701  | -11338     | -4090 | 1415 | O |
| ATOM   | 1349 | CB  | LEU | A | 188 | 1.429  | 23.672 | 28.290 | 1.00149.21 |       |      | C |
| ANISOU | 1349 | CB  | LEU | A | 188 | 20701  | 20305  | 15689  | -10727     | -3715 | 1514 | C |
| ATOM   | 1350 | CG  | LEU | A | 188 | 0.367  | 23.118 | 27.339 | 1.00152.79 |       |      | C |
| ANISOU | 1350 | CG  | LEU | A | 188 | 21313  | 20442  | 16296  | -10274     | -3445 | 1308 | C |
| ATOM   | 1351 | CD1 | LEU | A | 188 | 0.231  | 21.612 | 27.501 | 1.00127.22 |       |      | C |
| ANISOU | 1351 | CD1 | LEU | A | 188 | 17732  | 17352  | 13254  | -10085     | -3477 | 1481 | C |
| ATOM   | 1352 | CD2 | LEU | A | 188 | -0.967 | 23.809 | 27.578 | 1.00126.22 |       |      | C |
| ANISOU | 1352 | CD2 | LEU | A | 188 | 18493  | 16737  | 12729  | -10037     | -3318 | 936  | C |
| ATOM   | 1353 | N   | GLU | A | 189 | 3.298  | 26.421 | 29.484 | 1.00148.39 |       |      | N |
| ANISOU | 1353 | N   | GLU | A | 189 | 20759  | 20436  | 15185  | -11773     | -4089 | 1536 | N |
| ATOM   | 1354 | CA  | GLU | A | 189 | 3.829  | 27.104 | 30.650 | 1.00154.05 |       |      | C |
| ANISOU | 1354 | CA  | GLU | A | 189 | 21533  | 21335  | 15663  | -12183     | -4367 | 1565 | C |
| ATOM   | 1355 | C   | GLU | A | 189 | 2.899  | 28.259 | 30.996 | 1.00154.44 |       |      | C |
| ANISOU | 1355 | C   | GLU | A | 189 | 22256  | 21031  | 15395  | -12165     | -4237 | 1235 | C |
| ATOM   | 1356 | O   | GLU | A | 189 | 2.599  | 28.500 | 32.166 | 1.00157.57 |       |      | O |
| ANISOU | 1356 | O   | GLU | A | 189 | 22894  | 21467  | 15508  | -12293     | -4386 | 1177 | O |
| ATOM   | 1357 | CB  | GLU | A | 189 | 5.238  | 27.621 | 30.375 | 1.00167.19 |       |      | C |
| ANISOU | 1357 | CB  | GLU | A | 189 | 22788  | 23215  | 17520  | -12627     | -4493 | 1708 | C |
| ATOM   | 1358 | CG  | GLU | A | 189 | 6.258  | 26.527 | 30.127 | 1.00180.57 |       |      | C |
| ANISOU | 1358 | CG  | GLU | A | 189 | 23717  | 25298  | 19594  | -12668     | -4636 | 2051 | C |
| ATOM   | 1359 | CD  | GLU | A | 189 | 7.609  | 27.079 | 29.726 | 1.00206.44 |       |      | C |
| ANISOU | 1359 | CD  | GLU | A | 189 | 26525  | 28757  | 23156  | -13094     | -4683 | 2150 | C |
| ATOM   | 1360 | OE1 | GLU | A | 189 | 7.770  | 28.319 | 29.723 | 1.00210.43 |       |      | O |
| ANISOU | 1360 | OE1 | GLU | A | 189 | 27341  | 29088  | 23525  | -13401     | -4635 | 1953 | O |
| ATOM   | 1361 | OE2 | GLU | A | 189 | 8.509  | 26.274 | 29.411 | 1.00221.33 |       |      | O |
| ANISOU | 1361 | OE2 | GLU | A | 189 | 27710  | 30952  | 25435  | -13129     | -4749 | 2423 | O |
| ATOM   | 1362 | N   | ASN | A | 190 | 2.439  | 28.962 | 29.965 | 1.00150.71 |       |      | N |
| ANISOU | 1362 | N   | ASN | A | 190 | 22094  | 20200  | 14970  | -12013     | -3959 | 1030 | N |
| ATOM   | 1363 | CA  | ASN | A | 190 | 1.520  | 30.081 | 30.138 | 1.00177.30 |       |      | C |

|        |      |     |     |   |     |        |        |        |            |       |       |   |
|--------|------|-----|-----|---|-----|--------|--------|--------|------------|-------|-------|---|
| ANISOU | 1363 | CA  | ASN | A | 190 | 26076  | 23193  | 18095  | -11950     | -3820 | 724   | C |
| ATOM   | 1364 | C   | ASN | A | 190 | 0.191  | 29.618 | 30.729 | 1.00145.53 |       |       | C |
| ANISOU | 1364 | C   | ASN | A | 190 | 22296  | 19031  | 13966  | -11557     | -3736 | 559   | C |
| ATOM   | 1365 | O   | ASN | A | 190 | -0.527 | 28.841 | 30.111 | 1.00140.39 |       |       | O |
| ANISOU | 1365 | O   | ASN | A | 190 | 21580  | 18272  | 13488  | -11142     | -3580 | 513   | O |
| ATOM   | 1366 | CB  | ASN | A | 190 | 1.292  | 30.790 | 28.799 | 1.00148.46 |       |       | C |
| ANISOU | 1366 | CB  | ASN | A | 190 | 22697  | 19183  | 14530  | -11840     | -3567 | 583   | C |
| ATOM   | 1367 | CG  | ASN | A | 190 | 0.583  | 32.124 | 28.953 | 1.00159.51 |       |       | C |
| ANISOU | 1367 | CG  | ASN | A | 190 | 24707  | 20201  | 15698  | -11864     | -3467 | 305   | C |
| ATOM   | 1368 | OD1 | ASN | A | 190 | -0.630 | 32.176 | 29.154 | 1.00146.01 |       |       | O |
| ANISOU | 1368 | OD1 | ASN | A | 190 | 23302  | 18251  | 13926  | -11503     | -3362 | 94    | O |
| ATOM   | 1369 | ND2 | ASN | A | 190 | 1.339  | 33.213 | 28.848 | 1.00154.81 |       |       | N |
| ANISOU | 1369 | ND2 | ASN | A | 190 | 24272  | 19537  | 15014  | -12299     | -3492 | 295   | N |
| ATOM   | 1370 | N   | GLU | A | 191 | -0.122 | 30.099 | 31.928 | 1.00179.59 |       |       | N |
| ANISOU | 1370 | N   | GLU | A | 191 | 26883  | 23344  | 18010  | -11720     | -3829 | 454   | N |
| ATOM   | 1371 | CA  | GLU | A | 191 | -1.329 | 29.690 | 32.645 | 1.00175.52 |       |       | C |
| ANISOU | 1371 | CA  | GLU | A | 191 | 26581  | 22717  | 17393  | -11430     | -3730 | 288   | C |
| ATOM   | 1372 | C   | GLU | A | 191 | -2.610 | 29.948 | 31.856 | 1.00157.45 |       |       | C |
| ANISOU | 1372 | C   | GLU | A | 191 | 24554  | 20020  | 15250  | -10954     | -3439 | -13   | C |
| ATOM   | 1373 | O   | GLU | A | 191 | -3.564 | 29.173 | 31.937 | 1.00149.52 |       |       | O |
| ANISOU | 1373 | O   | GLU | A | 191 | 23509  | 18952  | 14351  | -10598     | -3318 | -121  | O |
| ATOM   | 1374 | CB  | GLU | A | 191 | -1.415 | 30.397 | 34.000 | 1.00194.35 |       |       | C |
| ANISOU | 1374 | CB  | GLU | A | 191 | 29295  | 25117  | 19434  | -11750     | -3846 | 190   | C |
| ATOM   | 1375 | CG  | GLU | A | 191 | -0.375 | 29.948 | 35.013 | 1.00214.67 |       |       | C |
| ANISOU | 1375 | CG  | GLU | A | 191 | 31631  | 28105  | 21829  | -12183     | -4190 | 471   | C |
| ATOM   | 1376 | CD  | GLU | A | 191 | -0.478 | 30.706 | 36.322 | 1.00235.92 |       |       | C |
| ANISOU | 1376 | CD  | GLU | A | 191 | 34715  | 30779  | 24144  | -12529     | -4310 | 347   | C |
| ATOM   | 1377 | OE1 | GLU | A | 191 | -0.783 | 31.917 | 36.285 | 1.00243.40 |       |       | O |
| ANISOU | 1377 | OE1 | GLU | A | 191 | 36043  | 31440  | 24999  | -12602     | -4188 | 95    | O |
| ATOM   | 1378 | OE2 | GLU | A | 191 | -0.261 | 30.091 | 37.387 | 1.00245.41 |       |       | O |
| ANISOU | 1378 | OE2 | GLU | A | 191 | 35878  | 32240  | 25126  | -12741     | -4533 | 504   | O |
| ATOM   | 1379 | N   | GLU | A | 192 | -2.629 | 31.037 | 31.094 | 1.00149.93 |       |       | N |
| ANISOU | 1379 | N   | GLU | A | 192 | 23868  | 18786  | 14313  | -10968     | -3344 | -151  | N |
| ATOM   | 1380 | CA  | GLU | A | 192 | -3.819 | 31.418 | 30.342 | 1.00147.92 |       |       | C |
| ANISOU | 1380 | CA  | GLU | A | 192 | 23884  | 18127  | 14192  | -10535     | -3131 | -436  | C |
| ATOM   | 1381 | C   | GLU | A | 192 | -4.048 | 30.483 | 29.154 | 1.00155.25 |       |       | C |
| ANISOU | 1381 | C   | GLU | A | 192 | 24559  | 19025  | 15404  | -10166     | -3040 | -388  | C |
| ATOM   | 1382 | O   | GLU | A | 192 | -5.171 | 30.342 | 28.670 | 1.00164.37 |       |       | O |
| ANISOU | 1382 | O   | GLU | A | 192 | 25805  | 19920  | 16726  | -9730      | -2909 | -621  | O |
| ATOM   | 1383 | CB  | GLU | A | 192 | -3.719 | 32.875 | 29.884 | 1.00149.69 |       |       | C |
| ANISOU | 1383 | CB  | GLU | A | 192 | 24531  | 18039  | 14307  | -10701     | -3088 | -565  | C |
| ATOM   | 1384 | CG  | GLU | A | 192 | -5.052 | 33.509 | 29.522 | 1.00153.16 |       |       | C |
| ANISOU | 1384 | CG  | GLU | A | 192 | 25330  | 18042  | 14824  | -10298     | -2935 | -900  | C |
| ATOM   | 1385 | CD  | GLU | A | 192 | -4.954 | 35.014 | 29.346 | 1.00167.85 |       |       | C |
| ANISOU | 1385 | CD  | GLU | A | 192 | 27679  | 19579  | 16516  | -10519     | -2917 | -1022 | C |
| ATOM   | 1386 | OE1 | GLU | A | 192 | -3.859 | 35.576 | 29.569 | 1.00167.78 |       |       | O |
| ANISOU | 1386 | OE1 | GLU | A | 192 | 27733  | 19692  | 16325  | -11016     | -3006 | -866  | O |
| ATOM   | 1387 | OE2 | GLU | A | 192 | -5.977 | 35.635 | 28.987 | 1.00175.52 |       |       | O |
| ANISOU | 1387 | OE2 | GLU | A | 192 | 28966  | 20167  | 17556  | -10201     | -2825 | -1288 | O |
| ATOM   | 1388 | N   | THR | A | 193 | -2.976 | 29.847 | 28.691 | 1.00150.37 |       |       | N |
| ANISOU | 1388 | N   | THR | A | 193 | 23601  | 18672  | 14862  | -10352     | -3123 | -102  | N |
| ATOM   | 1389 | CA  | THR | A | 193 | -3.069 | 28.835 | 27.642 | 1.00137.25 |       |       | C |
| ANISOU | 1389 | CA  | THR | A | 193 | 21680  | 17016  | 13455  | -10058     | -3044 | -32   | C |
| ATOM   | 1390 | C   | THR | A | 193 | -3.747 | 27.582 | 28.189 | 1.00133.69 |       |       | C |
| ANISOU | 1390 | C   | THR | A | 193 | 20977  | 16692  | 13128  | -9770      | -3032 | -53   | C |
| ATOM   | 1391 | O   | THR | A | 193 | -4.571 | 26.958 | 27.517 | 1.00121.75 |       |       | O |
| ANISOU | 1391 | O   | THR | A | 193 | 19416  | 15015  | 11829  | -9371      | -2912 | -198  | O |
| ATOM   | 1392 | CB  | THR | A | 193 | -1.674 | 28.471 | 27.089 | 1.00134.06 |       |       | C |
| ANISOU | 1392 | CB  | THR | A | 193 | 20929  | 16879  | 13127  | -10374     | -3123 | 281   | C |
| ATOM   | 1393 | OG1 | THR | A | 193 | -1.162 | 29.564 | 26.318 | 1.00134.28 |       |       | O |
| ANISOU | 1393 | OG1 | THR | A | 193 | 21219  | 16723  | 13079  | -10617     | -3065 | 267   | O |
| ATOM   | 1394 | CG2 | THR | A | 193 | -1.746 | 27.237 | 26.209 | 1.00128.64 |       |       | C |
| ANISOU | 1394 | CG2 | THR | A | 193 | 19935  | 16239  | 12703  | -10095     | -3045 | 369   | C |
| ATOM   | 1395 | N   | GLN | A | 194 | -3.401 | 27.228 | 29.423 | 1.00127.92 |       |       | N |
| ANISOU | 1395 | N   | GLN | A | 194 | 20118  | 16241  | 12247  | -10006     | -3169 | 85    | N |
| ATOM   | 1396 | CA  | GLN | A | 194 | -3.962 | 26.056 | 30.080 | 1.00125.71 |       |       | C |
| ANISOU | 1396 | CA  | GLN | A | 194 | 19661  | 16085  | 12019  | -9833      | -3160 | 98    | C |
| ATOM   | 1397 | C   | GLN | A | 194 | -5.454 | 26.222 | 30.332 | 1.00135.69 |       |       | C |
| ANISOU | 1397 | C   | GLN | A | 194 | 21175  | 17056  | 13326  | -9489      | -2975 | -272  | C |
| ATOM   | 1398 | O   | GLN | A | 194 | -6.206 | 25.247 | 30.319 | 1.00132.35 |       |       | O |

|        |      |     |     |   |     |        |        |        |            |       |       |   |
|--------|------|-----|-----|---|-----|--------|--------|--------|------------|-------|-------|---|
| ANISOU | 1398 | O   | GLN | A | 194 | 20606  | 16604  | 13077  | -9210      | -2876 | -366  | O |
| ATOM   | 1399 | CB  | GLN | A | 194 | -3.241 | 25.791 | 31.401 | 1.00129.71 |       |       | C |
| ANISOU | 1399 | CB  | GLN | A | 194 | 20078  | 16933  | 12271  | -10231     | -3383 | 342   | C |
| ATOM   | 1400 | CG  | GLN | A | 194 | -1.748 | 25.562 | 31.257 | 1.00136.68 |       |       | C |
| ANISOU | 1400 | CG  | GLN | A | 194 | 20602  | 18150  | 13179  | -10572     | -3618 | 706   | C |
| ATOM   | 1401 | CD  | GLN | A | 194 | -1.051 | 25.400 | 32.594 | 1.00143.10 |       |       | C |
| ANISOU | 1401 | CD  | GLN | A | 194 | 21343  | 19297  | 13731  | -10978     | -3911 | 939   | C |
| ATOM   | 1402 | OE1 | GLN | A | 194 | -1.691 | 25.151 | 33.615 | 1.00141.59 |       |       | O |
| ANISOU | 1402 | OE1 | GLN | A | 194 | 21367  | 19109  | 13321  | -10999     | -3923 | 878   | O |
| ATOM   | 1403 | NE2 | GLN | A | 194 | 0.269  | 25.548 | 32.594 | 1.00149.37 |       |       | N |
| ANISOU | 1403 | NE2 | GLN | A | 194 | 21831  | 20373  | 14548  | -11329     | -4157 | 1203  | N |
| ATOM   | 1404 | N   | ILE | A | 195 | -5.878 | 27.462 | 30.558 | 1.00130.62 |       |       | N |
| ANISOU | 1404 | N   | ILE | A | 195 | 20884  | 16189  | 12555  | -9522      | -2929 | -496  | N |
| ATOM   | 1405 | CA  | ILE | A | 195 | -7.276 | 27.745 | 30.868 | 1.00128.41 |       |       | C |
| ANISOU | 1405 | CA  | ILE | A | 195 | 20804  | 15639  | 12349  | -9218      | -2770 | -871  | C |
| ATOM   | 1406 | C   | ILE | A | 195 | -8.112 | 27.991 | 29.606 | 1.00125.04 |       |       | C |
| ANISOU | 1406 | C   | ILE | A | 195 | 20405  | 14878  | 12226  | -8768      | -2663 | -1132 | C |
| ATOM   | 1407 | O   | ILE | A | 195 | -9.300 | 27.668 | 29.561 | 1.00118.12 |       |       | O |
| ANISOU | 1407 | O   | ILE | A | 195 | 19474  | 13831  | 11575  | -8402      | -2554 | -1430 | O |
| ATOM   | 1408 | CB  | ILE | A | 195 | -7.399 | 28.925 | 31.859 | 1.00138.27 |       |       | C |
| ANISOU | 1408 | CB  | ILE | A | 195 | 22422  | 16800  | 13314  | -9476      | -2784 | -1006 | C |
| ATOM   | 1409 | CG1 | ILE | A | 195 | -6.600 | 28.621 | 33.129 | 1.00146.36 |       |       | C |
| ANISOU | 1409 | CG1 | ILE | A | 195 | 23444  | 18159  | 14006  | -9936      | -2934 | -754  | C |
| ATOM   | 1410 | CG2 | ILE | A | 195 | -8.855 | 29.203 | 32.202 | 1.00126.58 |       |       | C |
| ANISOU | 1410 | CG2 | ILE | A | 195 | 21105  | 15046  | 11944  | -9166      | -2612 | -1417 | C |
| ATOM   | 1411 | CD1 | ILE | A | 195 | -6.631 | 29.726 | 34.159 | 1.00153.19 |       |       | C |
| ANISOU | 1411 | CD1 | ILE | A | 195 | 24698  | 18953  | 14553  | -10248     | -2963 | -880  | C |
| ATOM   | 1412 | N   | ASN | A | 196 | -7.485 | 28.540 | 28.572 | 1.00128.55 |       |       | N |
| ANISOU | 1412 | N   | ASN | A | 196 | 20939  | 15230  | 12675  | -8820      | -2710 | -1026 | N |
| ATOM   | 1413 | CA  | ASN | A | 196 | -8.191 | 28.790 | 27.318 | 1.00133.51 |       |       | C |
| ANISOU | 1413 | CA  | ASN | A | 196 | 21665  | 15537  | 13526  | -8436      | -2655 | -1240 | C |
| ATOM   | 1414 | C   | ASN | A | 196 | -8.104 | 27.631 | 26.327 | 1.00140.28 |       |       | C |
| ANISOU | 1414 | C   | ASN | A | 196 | 22235  | 16454  | 14612  | -8217      | -2639 | -1149 | C |
| ATOM   | 1415 | O   | ASN | A | 196 | -9.102 | 27.263 | 25.709 | 1.00142.57 |       |       | O |
| ANISOU | 1415 | O   | ASN | A | 196 | 22463  | 16548  | 15160  | -7796      | -2596 | -1409 | O |
| ATOM   | 1416 | CB  | ASN | A | 196 | -7.706 | 30.087 | 26.671 | 1.00132.74 |       |       | C |
| ANISOU | 1416 | CB  | ASN | A | 196 | 21950  | 15226  | 13260  | -8620      | -2692 | -1207 | C |
| ATOM   | 1417 | CG  | ASN | A | 196 | -8.170 | 31.318 | 27.423 | 1.00136.13 |       |       | C |
| ANISOU | 1417 | CG  | ASN | A | 196 | 22727  | 15458  | 13539  | -8703      | -2687 | -1418 | C |
| ATOM   | 1418 | OD1 | ASN | A | 196 | -9.248 | 31.326 | 28.018 | 1.00130.20 |       |       | O |
| ANISOU | 1418 | OD1 | ASN | A | 196 | 21969  | 14600  | 12903  | -8447      | -2636 | -1710 | O |
| ATOM   | 1419 | ND2 | ASN | A | 196 | -7.358 | 32.368 | 27.399 | 1.00145.54 |       |       | N |
| ANISOU | 1419 | ND2 | ASN | A | 196 | 24226  | 16589  | 14484  | -9084      | -2729 | -1292 | N |
| ATOM   | 1420 | N   | GLY | A | 197 | -6.912 | 27.062 | 26.174 | 1.00115.81 |       |       | N |
| ANISOU | 1420 | N   | GLY | A | 197 | 18942  | 13625  | 11436  | -8510      | -2689 | -802  | N |
| ATOM   | 1421 | CA  | GLY | A | 197 | -6.727 | 25.913 | 25.306 | 1.00116.80 |       |       | C |
| ANISOU | 1421 | CA  | GLY | A | 197 | 18795  | 13818  | 11766  | -8355      | -2664 | -698  | C |
| ATOM   | 1422 | C   | GLY | A | 197 | -6.035 | 26.217 | 23.991 | 1.00113.88 |       |       | C |
| ANISOU | 1422 | C   | GLY | A | 197 | 18561  | 13342  | 11365  | -8454      | -2662 | -570  | C |
| ATOM   | 1423 | O   | GLY | A | 197 | -5.272 | 27.173 | 23.887 | 1.00170.97 |       |       | O |
| ANISOU | 1423 | O   | GLY | A | 197 | 26008  | 20563  | 18390  | -8785      | -2691 | -442  | O |
| ATOM   | 1424 | N   | PHE | A | 198 | -6.302 | 25.396 | 22.982 | 1.00111.37 |       |       | N |
| ANISOU | 1424 | N   | PHE | A | 198 | 18146  | 12929  | 11241  | -8201      | -2615 | -617  | N |
| ATOM   | 1425 | CA  | PHE | A | 198 | -5.655 | 25.541 | 21.685 | 1.00112.25 |       |       | C |
| ANISOU | 1425 | CA  | PHE | A | 198 | 18430  | 12925  | 11295  | -8321      | -2585 | -493  | C |
| ATOM   | 1426 | C   | PHE | A | 198 | -6.659 | 25.569 | 20.541 | 1.00110.37 |       |       | C |
| ANISOU | 1426 | C   | PHE | A | 198 | 18479  | 12311  | 11145  | -7906      | -2573 | -776  | C |
| ATOM   | 1427 | O   | PHE | A | 198 | -7.870 | 25.495 | 20.755 | 1.00108.48 |       |       | O |
| ANISOU | 1427 | O   | PHE | A | 198 | 18217  | 11926  | 11073  | -7499      | -2604 | -1091 | O |
| ATOM   | 1428 | CB  | PHE | A | 198 | -4.658 | 24.406 | 21.454 | 1.00116.59 |       |       | C |
| ANISOU | 1428 | CB  | PHE | A | 198 | 18578  | 13759  | 11962  | -8522      | -2554 | -200  | C |
| ATOM   | 1429 | CG  | PHE | A | 198 | -3.390 | 24.540 | 22.242 | 1.00117.80 |       |       | C |
| ANISOU | 1429 | CG  | PHE | A | 198 | 18457  | 14273  | 12029  | -8976      | -2616 | 121   | C |
| ATOM   | 1430 | CD1 | PHE | A | 198 | -2.258 | 25.088 | 21.666 | 1.00128.34 |       |       | C |
| ANISOU | 1430 | CD1 | PHE | A | 198 | 19821  | 15662  | 13280  | -9360      | -2579 | 329   | C |
| ATOM   | 1431 | CD2 | PHE | A | 198 | -3.327 | 24.114 | 23.556 | 1.00120.42 |       |       | C |
| ANISOU | 1431 | CD2 | PHE | A | 198 | 18506  | 14882  | 12368  | -9033      | -2716 | 207   | C |
| ATOM   | 1432 | CE1 | PHE | A | 198 | -1.088 | 25.212 | 22.387 | 1.00122.78 |       |       | C |
| ANISOU | 1432 | CE1 | PHE | A | 198 | 18779  | 15306  | 12566  | -9760      | -2666 | 594   | C |
| ATOM   | 1433 | CE2 | PHE | A | 198 | -2.159 | 24.234 | 24.283 | 1.00124.72 |       |       | C |

|        |      |     |     |   |     |        |        |        |            |       |       |   |
|--------|------|-----|-----|---|-----|--------|--------|--------|------------|-------|-------|---|
| ANISOU | 1433 | CE2 | PHE | A | 198 | 18792  | 15763  | 12832  | -9437      | -2838 | 493   | C |
| ATOM   | 1434 | CZ  | PHE | A | 198 | -1.037 | 24.783 | 23.696 | 1.00123.06 |       |       | C |
| ANISOU | 1434 | CZ  | PHE | A | 198 | 18528  | 15626  | 12603  | -9786      | -2825 | 677   | C |
| ATOM   | 1435 | N   | CYS | A | 199 | -6.134 | 25.662 | 19.324 | 1.00111.46 |       |       | N |
| ANISOU | 1435 | N   | CYS | A | 199 | 18879  | 12297  | 11174  | -8022      | -2535 | -674  | N |
| ATOM   | 1436 | CA  | CYS | A | 199 | -6.947 | 25.719 | 18.119 | 1.00110.60 |       |       | C |
| ANISOU | 1436 | CA  | CYS | A | 199 | 19143  | 11812  | 11068  | -7656      | -2567 | -913  | C |
| ATOM   | 1437 | C   | CYS | A | 199 | -6.030 | 25.595 | 16.909 | 1.00112.43 |       |       | C |
| ANISOU | 1437 | C   | CYS | A | 199 | 19656  | 11940  | 11123  | -7931      | -2472 | -708  | C |
| ATOM   | 1438 | O   | CYS | A | 199 | -5.066 | 26.344 | 16.783 | 1.00115.65 |       |       | O |
| ANISOU | 1438 | O   | CYS | A | 199 | 20276  | 12359  | 11307  | -8374      | -2390 | -482  | O |
| ATOM   | 1439 | CB  | CYS | A | 199 | -7.711 | 27.042 | 18.057 | 1.00130.33 |       |       | C |
| ANISOU | 1439 | CB  | CYS | A | 199 | 22101  | 13988  | 13429  | -7472      | -2656 | -1129 | C |
| ATOM   | 1440 | SG  | CYS | A | 199 | -8.982 | 27.115 | 16.782 | 1.00164.42 |       |       | S |
| ANISOU | 1440 | SG  | CYS | A | 199 | 26802  | 17870  | 17801  | -6868      | -2797 | -1491 | S |
| ATOM   | 1441 | N   | ILE | A | 200 | -6.325 | 24.650 | 16.022 | 1.00113.62 |       |       | N |
| ANISOU | 1441 | N   | ILE | A | 200 | 19816  | 11974  | 11379  | -7691      | -2459 | -807  | N |
| ATOM   | 1442 | CA  | ILE | A | 200 | -5.472 | 24.418 | 14.858 | 1.00128.41 |       |       | C |
| ANISOU | 1442 | CA  | ILE | A | 200 | 21991  | 13715  | 13086  | -7966      | -2313 | -631  | C |
| ATOM   | 1443 | C   | ILE | A | 200 | -6.156 | 24.812 | 13.547 | 1.00127.40 |       |       | C |
| ANISOU | 1443 | C   | ILE | A | 200 | 22593  | 13096  | 12718  | -7637      | -2384 | -856  | C |
| ATOM   | 1444 | O   | ILE | A | 200 | -7.345 | 24.559 | 13.354 | 1.00111.90 |       |       | O |
| ANISOU | 1444 | O   | ILE | A | 200 | 20643  | 10988  | 10886  | -7075      | -2567 | -1181 | O |
| ATOM   | 1445 | CB  | ILE | A | 200 | -4.996 | 22.948 | 14.788 | 1.00129.41 |       |       | C |
| ANISOU | 1445 | CB  | ILE | A | 200 | 21621  | 14071  | 13478  | -8041      | -2196 | -509  | C |
| ATOM   | 1446 | CG1 | ILE | A | 200 | -4.501 | 22.483 | 16.159 | 1.00125.14 |       |       | C |
| ANISOU | 1446 | CG1 | ILE | A | 200 | 20367  | 14002  | 13178  | -8225      | -2198 | -300  | C |
| ATOM   | 1447 | CG2 | ILE | A | 200 | -3.902 | 22.778 | 13.741 | 1.00114.39 |       |       | C |
| ANISOU | 1447 | CG2 | ILE | A | 200 | 19944  | 12063  | 11458  | -8439      | -1937 | -262  | C |
| ATOM   | 1448 | CD1 | ILE | A | 200 | -3.967 | 21.061 | 16.171 | 1.00124.39 |       |       | C |
| ANISOU | 1448 | CD1 | ILE | A | 200 | 19753  | 14134  | 13376  | -8302      | -2083 | -117  | C |
| ATOM   | 1449 | N   | ILE | A | 201 | -5.397 | 25.447 | 12.657 | 1.00124.82 |       |       | N |
| ANISOU | 1449 | N   | ILE | A | 201 | 22861  | 12515  | 12048  | -7977      | -2231 | -685  | N |
| ATOM   | 1450 | CA  | ILE | A | 201 | -5.898 | 25.839 | 11.346 | 1.00128.67 |       |       | C |
| ANISOU | 1450 | CA  | ILE | A | 201 | 24189  | 12494  | 12205  | -7677      | -2288 | -846  | C |
| ATOM   | 1451 | C   | ILE | A | 201 | -5.180 | 25.060 | 10.253 | 1.00124.03 |       |       | C |
| ANISOU | 1451 | C   | ILE | A | 201 | 23898  | 11742  | 11485  | -7877      | -2030 | -743  | C |
| ATOM   | 1452 | O   | ILE | A | 201 | -3.971 | 25.206 | 10.066 | 1.00123.77 |       |       | O |
| ANISOU | 1452 | O   | ILE | A | 201 | 23910  | 11738  | 11378  | -8466      | -1677 | -424  | O |
| ATOM   | 1453 | CB  | ILE | A | 201 | -5.688 | 27.340 | 11.080 | 1.00147.38 |       |       | C |
| ANISOU | 1453 | CB  | ILE | A | 201 | 27266  | 14546  | 14186  | -7881      | -2261 | -746  | C |
| ATOM   | 1454 | CG1 | ILE | A | 201 | -6.196 | 28.175 | 12.255 | 1.00152.86 |       |       | C |
| ANISOU | 1454 | CG1 | ILE | A | 201 | 27672  | 15390  | 15017  | -7804      | -2434 | -815  | C |
| ATOM   | 1455 | CG2 | ILE | A | 201 | -6.381 | 27.751 | 9.788  | 1.00151.38 |       |       | C |
| ANISOU | 1455 | CG2 | ILE | A | 201 | 28680  | 14507  | 14329  | -7428      | -2390 | -914  | C |
| ATOM   | 1456 | CD1 | ILE | A | 201 | -7.688 | 28.087 | 12.460 | 1.00163.29 |       |       | C |
| ANISOU | 1456 | CD1 | ILE | A | 201 | 28830  | 16638  | 16574  | -7097      | -2730 | -1172 | C |
| ATOM   | 1457 | N   | GLU | A | 202 | -5.928 | 24.234 | 9.530  | 1.00121.45 |       |       | N |
| ANISOU | 1457 | N   | GLU | A | 202 | 23722  | 11246  | 11176  | -7362      | -2159 | -1015 | N |
| ATOM   | 1458 | CA  | GLU | A | 202 | -5.358 | 23.429 | 8.458  | 1.00131.39 |       |       | C |
| ANISOU | 1458 | CA  | GLU | A | 202 | 25353  | 12280  | 12289  | -7474      | -1891 | -982  | C |
| ATOM   | 1459 | C   | GLU | A | 202 | -5.731 | 23.972 | 7.086  | 1.00136.95 |       |       | C |
| ANISOU | 1459 | C   | GLU | A | 202 | 27138  | 12444  | 12454  | -7108      | -1933 | -1132 | C |
| ATOM   | 1460 | O   | GLU | A | 202 | -6.863 | 23.813 | 6.631  | 1.00123.75 |       |       | O |
| ANISOU | 1460 | O   | GLU | A | 202 | 25612  | 10668  | 10738  | -6385      | -2277 | -1442 | O |
| ATOM   | 1461 | CB  | GLU | A | 202 | -5.817 | 21.980 | 8.584  | 1.00130.11 |       |       | C |
| ANISOU | 1461 | CB  | GLU | A | 202 | 24632  | 12314  | 12490  | -7151      | -1971 | -1193 | C |
| ATOM   | 1462 | CG  | GLU | A | 202 | -5.353 | 21.290 | 9.851  | 1.00125.61 |       |       | C |
| ANISOU | 1462 | CG  | GLU | A | 202 | 23071  | 12242  | 12411  | -7497      | -1887 | -988  | C |
| ATOM   | 1463 | CD  | GLU | A | 202 | -3.877 | 20.948 | 9.819  | 1.00136.78 |       |       | C |
| ANISOU | 1463 | CD  | GLU | A | 202 | 24047  | 13952  | 13970  | -7896      | -1361 | -470  | C |
| ATOM   | 1464 | OE1 | GLU | A | 202 | -3.249 | 21.100 | 8.750  | 1.00158.11 |       |       | O |
| ANISOU | 1464 | OE1 | GLU | A | 202 | 27151  | 16493  | 16428  | -7837      | -971  | -288  | O |
| ATOM   | 1465 | OE2 | GLU | A | 202 | -3.344 | 20.522 | 10.865 | 1.00123.95 |       |       | O |
| ANISOU | 1465 | OE2 | GLU | A | 202 | 21645  | 12743  | 12708  | -8221      | -1321 | -234  | O |
| ATOM   | 1466 | N   | ASN | A | 203 | -4.766 | 24.609 | 6.432  | 1.00142.83 |       |       | N |
| ANISOU | 1466 | N   | ASN | A | 203 | 28419  | 12985  | 12864  | -7453      | -1503 | -802  | N |
| ATOM   | 1467 | CA  | ASN | A | 203 | -4.985 | 25.193 | 5.116  | 1.00150.67 |       |       | C |
| ANISOU | 1467 | CA  | ASN | A | 203 | 30524  | 13462  | 13263  | -7113      | -1464 | -856  | C |
| ATOM   | 1468 | C   | ASN | A | 203 | -4.732 | 24.188 | 4.000  | 1.00154.26 |       |       | C |

|        |      |     |     |   |     |        |        |        |            |       |       |   |
|--------|------|-----|-----|---|-----|--------|--------|--------|------------|-------|-------|---|
| ANISOU | 1468 | C   | ASN | A | 203 | 31105  | 13921  | 13585  | -6706      | -1115 | -819  | C |
| ATOM   | 1469 | O   | ASN | A | 203 | -3.607 | 24.046 | 3.521  | 1.00149.35 |       |       | O |
| ANISOU | 1469 | O   | ASN | A | 203 | 30453  | 13387  | 12905  | -6963      | -461  | -438  | O |
| ATOM   | 1470 | CB  | ASN | A | 203 | -4.096 | 26.423 | 4.929  | 1.00161.80 |       |       | C |
| ANISOU | 1470 | CB  | ASN | A | 203 | 32486  | 14634  | 14356  | -7650      | -1086 | -491  | C |
| ATOM   | 1471 | CG  | ASN | A | 203 | -4.440 | 27.204 | 3.678  | 1.00169.04 |       |       | C |
| ANISOU | 1471 | CG  | ASN | A | 203 | 34702  | 14935  | 14589  | -7303      | -1110 | -542  | C |
| ATOM   | 1472 | OD1 | ASN | A | 203 | -5.549 | 27.104 | 3.156  | 1.00170.67 |       |       | O |
| ANISOU | 1472 | OD1 | ASN | A | 203 | 35433  | 14864  | 14549  | -6661      | -1619 | -920  | O |
| ATOM   | 1473 | ND2 | ASN | A | 203 | -3.487 | 27.992 | 3.192  | 1.00175.08 |       |       | N |
| ANISOU | 1473 | ND2 | ASN | A | 203 | 36003  | 15476  | 15043  | -7732      | -565  | -163  | N |
| ATOM   | 1474 | N   | PHE | A | 204 | -5.787 | 23.493 | 3.587  | 1.00161.45 |       |       | N |
| ANISOU | 1474 | N   | PHE | A | 204 | 32148  | 14731  | 14465  | -6080      | -1539 | -1244 | N |
| ATOM   | 1475 | CA  | PHE | A | 204 | -5.670 | 22.462 | 2.562  | 1.00166.86 |       |       | C |
| ANISOU | 1475 | CA  | PHE | A | 204 | 32973  | 15403  | 15023  | -5663      | -1270 | -1291 | C |
| ATOM   | 1476 | C   | PHE | A | 204 | -5.990 | 22.981 | 1.163  | 1.00179.51 |       |       | C |
| ANISOU | 1476 | C   | PHE | A | 204 | 35834  | 16486  | 15887  | -5242      | -1334 | -1397 | C |
| ATOM   | 1477 | O   | PHE | A | 204 | -6.668 | 22.313 | 0.384  | 1.00191.84 |       |       | O |
| ANISOU | 1477 | O   | PHE | A | 204 | 37728  | 17907  | 17256  | -4681      | -1585 | -1729 | O |
| ATOM   | 1478 | CB  | PHE | A | 204 | -6.553 | 21.258 | 2.903  | 1.00159.85 |       |       | C |
| ANISOU | 1478 | CB  | PHE | A | 204 | 31458  | 14722  | 14557  | -5270      | -1653 | -1700 | C |
| ATOM   | 1479 | CG  | PHE | A | 204 | -5.967 | 20.352 | 3.950  | 1.00144.52 |       |       | C |
| ANISOU | 1479 | CG  | PHE | A | 204 | 28358  | 13286  | 13268  | -5597      | -1371 | -1497 | C |
| ATOM   | 1480 | CD1 | PHE | A | 204 | -6.692 | 19.283 | 4.447  | 1.00139.81 |       |       | C |
| ANISOU | 1480 | CD1 | PHE | A | 204 | 27136  | 12875  | 13112  | -5346      | -1647 | -1812 | C |
| ATOM   | 1481 | CD2 | PHE | A | 204 | -4.688 | 20.567 | 4.434  | 1.00143.49 |       |       | C |
| ANISOU | 1481 | CD2 | PHE | A | 204 | 27771  | 13433  | 13316  | -6155      | -839  | -988  | C |
| ATOM   | 1482 | CE1 | PHE | A | 204 | -6.149 | 18.447 | 5.406  | 1.00149.43 |       |       | C |
| ANISOU | 1482 | CE1 | PHE | A | 204 | 27373  | 14518  | 14886  | -5616      | -1394 | -1590 | C |
| ATOM   | 1483 | CE2 | PHE | A | 204 | -4.142 | 19.734 | 5.393  | 1.00147.50 |       |       | C |
| ANISOU | 1483 | CE2 | PHE | A | 204 | 27238  | 14405  | 14400  | -6406      | -645  | -783  | C |
| ATOM   | 1484 | CZ  | PHE | A | 204 | -4.874 | 18.674 | 5.880  | 1.00153.39 |       |       | C |
| ANISOU | 1484 | CZ  | PHE | A | 204 | 27447  | 15303  | 15530  | -6121      | -922  | -1068 | C |
| ATOM   | 1485 | N   | LYS | A | 205 | -5.495 | 24.174 | 0.848  | 1.00176.70 |       |       | N |
| ANISOU | 1485 | N   | LYS | A | 205 | 36211  | 15828  | 15098  | -5528      | -1112 | -1113 | N |
| ATOM   | 1486 | CA  | LYS | A | 205 | -5.676 | 24.742 | -0.482 | 1.00181.25 |       |       | C |
| ANISOU | 1486 | CA  | LYS | A | 205 | 38094  | 15875  | 14898  | -5169      | -1104 | -1128 | C |
| ATOM   | 1487 | C   | LYS | A | 205 | -4.857 | 23.970 | -1.510 | 1.00183.30 |       |       | C |
| ANISOU | 1487 | C   | LYS | A | 205 | 38573  | 16160  | 14914  | -5075      | -402  | -923  | C |
| ATOM   | 1488 | O   | LYS | A | 205 | -5.369 | 23.584 | -2.561 | 1.00188.07 |       |       | O |
| ANISOU | 1488 | O   | LYS | A | 205 | 39902  | 16505  | 15050  | -4517      | -568  | -1164 | O |
| ATOM   | 1489 | CB  | LYS | A | 205 | -5.288 | 26.223 | -0.498 | 1.00190.28 |       |       | C |
| ANISOU | 1489 | CB  | LYS | A | 205 | 39985  | 16651  | 15661  | -5559      | -962  | -837  | C |
| ATOM   | 1490 | CG  | LYS | A | 205 | -5.406 | 26.885 | -1.866 | 1.00211.75 |       |       | C |
| ANISOU | 1490 | CG  | LYS | A | 205 | 44170  | 18772  | 17512  | -5213      | -904  | -783  | C |
| ATOM   | 1491 | CD  | LYS | A | 205 | -6.814 | 26.757 | -2.431 | 1.00226.16 |       |       | C |
| ANISOU | 1491 | CD  | LYS | A | 205 | 46277  | 20435  | 19219  | -4319      | -1716 | -1126 | C |
| ATOM   | 1492 | CE  | LYS | A | 205 | -6.918 | 27.385 | -3.814 | 1.00245.57 |       |       | C |
| ANISOU | 1492 | CE  | LYS | A | 205 | 50046  | 22335  | 20926  | -3905      | -1677 | -956  | C |
| ATOM   | 1493 | NZ  | LYS | A | 205 | -8.279 | 27.228 | -4.399 | 1.00254.18 |       |       | N |
| ANISOU | 1493 | NZ  | LYS | A | 205 | 51046  | 23384  | 22146  | -2985      | -2463 | -1160 | N |
| ATOM   | 1494 | N   | GLY | A | 206 | -3.586 | 23.741 | -1.196 | 1.00180.53 |       |       | N |
| ANISOU | 1494 | N   | GLY | A | 206 | 37578  | 16126  | 14890  | -5614      | 372   | -497  | N |
| ATOM   | 1495 | CA  | GLY | A | 206 | -2.693 | 23.028 | -2.091 | 1.00179.09 |       |       | C |
| ANISOU | 1495 | CA  | GLY | A | 206 | 37502  | 15989  | 14555  | -5570      | 1156  | -278  | C |
| ATOM   | 1496 | C   | GLY | A | 206 | -2.560 | 21.556 | -1.751 | 1.00167.39 |       |       | C |
| ANISOU | 1496 | C   | GLY | A | 206 | 34983  | 14954  | 13663  | -5409      | 1289  | -382  | C |
| ATOM   | 1497 | O   | GLY | A | 206 | -1.490 | 20.967 | -1.910 | 1.00166.11 |       |       | O |
| ANISOU | 1497 | O   | GLY | A | 206 | 34360  | 15026  | 13729  | -5609      | 2050  | -82   | O |
| ATOM   | 1498 | N   | PHE | A | 207 | -3.652 | 20.959 | -1.284 | 1.00155.52 |       |       | N |
| ANISOU | 1498 | N   | PHE | A | 207 | 33112  | 13549  | 12432  | -5041      | 572   | -813  | N |
| ATOM   | 1499 | CA  | PHE | A | 207 | -3.662 | 19.548 | -0.915 | 1.00151.13 |       |       | C |
| ANISOU | 1499 | CA  | PHE | A | 207 | 31630  | 13353  | 12440  | -4869      | 640   | -945  | C |
| ATOM   | 1500 | C   | PHE | A | 207 | -3.889 | 18.655 | -2.132 | 1.00164.02 |       |       | C |
| ANISOU | 1500 | C   | PHE | A | 207 | 33835  | 14775  | 13710  | -4317      | 792   | -1193 | C |
| ATOM   | 1501 | O   | PHE | A | 207 | -5.024 | 18.304 | -2.452 | 1.00147.45 |       |       | O |
| ANISOU | 1501 | O   | PHE | A | 207 | 32069  | 12498  | 11457  | -3836      | 157   | -1677 | O |
| ATOM   | 1502 | CB  | PHE | A | 207 | -4.732 | 19.284 | 0.146  | 1.00139.36 |       |       | C |
| ANISOU | 1502 | CB  | PHE | A | 207 | 29494  | 12036  | 11419  | -4772      | -127  | -1307 | C |
| ATOM   | 1503 | CG  | PHE | A | 207 | -4.820 | 17.850 | 0.572  | 1.00139.65 |       |       | C |

|        |      |     |     |   |     |        |        |        |            |      |       |   |
|--------|------|-----|-----|---|-----|--------|--------|--------|------------|------|-------|---|
| ANISOU | 1503 | CG  | PHE | A | 207 | 28642  | 12386  | 12033  | -4608      | -75  | -1446 | C |
| ATOM   | 1504 | CD1 | PHE | A | 207 | -3.696 | 17.180 | 1.026  | 1.00139.14 |      |       | C |
| ANISOU | 1504 | CD1 | PHE | A | 207 | 27745  | 12687  | 12434  | -4901      | 558  | -1051 | C |
| ATOM   | 1505 | CD2 | PHE | A | 207 | -6.027 | 17.173 | 0.531  | 1.00140.21 |      |       | C |
| ANISOU | 1505 | CD2 | PHE | A | 207 | 28696  | 12369  | 12208  | -4162      | -663 | -1975 | C |
| ATOM   | 1506 | CE1 | PHE | A | 207 | -3.773 | 15.857 | 1.423  | 1.00135.23 |      |       | C |
| ANISOU | 1506 | CE1 | PHE | A | 207 | 26495  | 12428  | 12460  | -4723      | 614  | -1153 | C |
| ATOM   | 1507 | CE2 | PHE | A | 207 | -6.111 | 15.852 | 0.928  | 1.00137.82 |      |       | C |
| ANISOU | 1507 | CE2 | PHE | A | 207 | 27626  | 12300  | 12439  | -4042      | -575 | -2098 | C |
| ATOM   | 1508 | CZ  | PHE | A | 207 | -4.982 | 15.193 | 1.376  | 1.00132.80 |      |       | C |
| ANISOU | 1508 | CZ  | PHE | A | 207 | 26240  | 11990  | 12227  | -4310      | 68   | -1672 | C |
| ATOM   | 1509 | N   | THR | A | 208 | -2.801 | 18.290 | -2.803 | 1.00170.19 |      |       | N |
| ANISOU | 1509 | N   | THR | A | 208 | 34714  | 15579  | 14372  | -4400      | 1644 | -881  | N |
| ATOM   | 1510 | CA  | THR | A | 208 | -2.875 | 17.475 | -4.012 | 1.00169.81 |      |       | C |
| ANISOU | 1510 | CA  | THR | A | 208 | 35297  | 15307  | 13916  | -3914      | 1909 | -1091 | C |
| ATOM   | 1511 | C   | THR | A | 208 | -3.158 | 16.012 | -3.686 | 1.00169.62 |      |       | C |
| ANISOU | 1511 | C   | THR | A | 208 | 34470  | 15525  | 14455  | -3639      | 1833 | -1356 | C |
| ATOM   | 1512 | O   | THR | A | 208 | -2.894 | 15.555 | -2.575 | 1.00165.09 |      |       | O |
| ANISOU | 1512 | O   | THR | A | 208 | 32782  | 15336  | 14610  | -3892      | 1859 | -1215 | O |
| ATOM   | 1513 | CB  | THR | A | 208 | -1.569 | 17.555 | -4.824 | 1.00176.20 |      |       | C |
| ANISOU | 1513 | CB  | THR | A | 208 | 36459  | 16052  | 14437  | -4105      | 2960 | -671  | C |
| ATOM   | 1514 | OG1 | THR | A | 208 | -0.516 | 16.896 | -4.109 | 1.00173.90 |      |       | O |
| ANISOU | 1514 | OG1 | THR | A | 208 | 34973  | 16207  | 14892  | -4432      | 3585 | -333  | O |
| ATOM   | 1515 | CG2 | THR | A | 208 | -1.181 | 19.006 | -5.067 | 1.00183.05 |      |       | C |
| ANISOU | 1515 | CG2 | THR | A | 208 | 38069  | 16669  | 14810  | -4475      | 3142 | -358  | C |
| ATOM   | 1516 | N   | MET | A | 209 | -3.692 | 15.280 | -4.661 | 1.00177.61 |      |       | N |
| ANISOU | 1516 | N   | MET | A | 209 | 36099  | 16284  | 15099  | -3128      | 1735 | -1742 | N |
| ATOM   | 1517 | CA  | MET | A | 209 | -3.953 | 13.854 | -4.493 | 1.00173.28 |      |       | C |
| ANISOU | 1517 | CA  | MET | A | 209 | 34924  | 15878  | 15035  | -2859      | 1724 | -2022 | C |
| ATOM   | 1518 | C   | MET | A | 209 | -2.645 | 13.096 | -4.310 | 1.00177.19 |      |       | C |
| ANISOU | 1518 | C   | MET | A | 209 | 34684  | 16645  | 15997  | -3050      | 2672 | -1604 | C |
| ATOM   | 1519 | O   | MET | A | 209 | -2.615 | 12.021 | -3.711 | 1.00151.97 |      |       | O |
| ANISOU | 1519 | O   | MET | A | 209 | 30636  | 13671  | 13436  | -2985      | 2734 | -1658 | O |
| ATOM   | 1520 | CB  | MET | A | 209 | -4.723 | 13.297 | -5.692 | 1.00181.87 |      |       | C |
| ANISOU | 1520 | CB  | MET | A | 209 | 36945  | 16601  | 15557  | -2303      | 1454 | -2535 | C |
| ATOM   | 1521 | CG  | MET | A | 209 | -6.136 | 13.834 | -5.817 | 1.00185.95 |      |       | C |
| ANISOU | 1521 | CG  | MET | A | 209 | 38015  | 16890  | 15747  | -2029      | 397  | -3030 | C |
| ATOM   | 1522 | SD  | MET | A | 209 | -7.038 | 13.161 | -7.224 | 1.00224.78 |      |       | S |
| ANISOU | 1522 | SD  | MET | A | 209 | 43910  | 21445  | 20049  | -1377      | -20  | -3625 | S |
| ATOM   | 1523 | CE  | MET | A | 209 | -6.957 | 11.409 | -6.871 | 1.00192.48 |      |       | C |
| ANISOU | 1523 | CE  | MET | A | 209 | 38963  | 17514  | 16657  | -1299      | 296  | -3896 | C |
| ATOM   | 1524 | N   | GLN | A | 210 | -1.568 | 13.672 | -4.834 | 1.00183.50 |      |       | N |
| ANISOU | 1524 | N   | GLN | A | 210 | 35824  | 17407  | 16491  | -3278      | 3425 | -1187 | N |
| ATOM   | 1525 | CA  | GLN | A | 210 | -0.229 | 13.134 | -4.646 | 1.00186.98 |      |       | C |
| ANISOU | 1525 | CA  | GLN | A | 210 | 35505  | 18129  | 17411  | -3494      | 4357 | -751  | C |
| ATOM   | 1526 | C   | GLN | A | 210 | 0.141  | 13.144 | -3.167 | 1.00166.85 |      |       | C |
| ANISOU | 1526 | C   | GLN | A | 210 | 31662  | 16046  | 15686  | -3908      | 4218 | -448  | C |
| ATOM   | 1527 | O   | GLN | A | 210 | 0.766  | 12.209 | -2.666 | 1.00163.55 |      |       | O |
| ANISOU | 1527 | O   | GLN | A | 210 | 30321  | 15916  | 15903  | -3905      | 4599 | -268  | O |
| ATOM   | 1528 | CB  | GLN | A | 210 | 0.781  | 13.960 | -5.442 | 1.00203.95 |      |       | C |
| ANISOU | 1528 | CB  | GLN | A | 210 | 38276  | 20140  | 19076  | -3740      | 5154 | -378  | C |
| ATOM   | 1529 | CG  | GLN | A | 210 | 2.225  | 13.556 | -5.229 | 1.00214.30 |      |       | C |
| ANISOU | 1529 | CG  | GLN | A | 210 | 38717  | 21769  | 20937  | -4009      | 6140 | 87    | C |
| ATOM   | 1530 | CD  | GLN | A | 210 | 3.190  | 14.481 | -5.939 | 1.00226.52 |      |       | C |
| ANISOU | 1530 | CD  | GLN | A | 210 | 40828  | 23181  | 22056  | -4342      | 6943 | 447   | C |
| ATOM   | 1531 | OE1 | GLN | A | 210 | 2.780  | 15.447 | -6.583 | 1.00227.41 |      |       | O |
| ANISOU | 1531 | OE1 | GLN | A | 210 | 42060  | 22932  | 21415  | -4373      | 6760 | 378   | O |
| ATOM   | 1532 | NE2 | GLN | A | 210 | 4.481  | 14.191 | -5.827 | 1.00235.11 |      |       | N |
| ANISOU | 1532 | NE2 | GLN | A | 210 | 41143  | 24548  | 23641  | -4587      | 7848 | 835   | N |
| ATOM   | 1533 | N   | GLN | A | 211 | -0.252 | 14.208 | -2.473 | 1.00153.64 |      |       | N |
| ANISOU | 1533 | N   | GLN | A | 211 | 29972  | 14428  | 13977  | -4242      | 3659 | -397  | N |
| ATOM   | 1534 | CA  | GLN | A | 211 | -0.005 | 14.325 | -1.042 | 1.00149.08 |      |       | C |
| ANISOU | 1534 | CA  | GLN | A | 211 | 28293  | 14272  | 14078  | -4653      | 3430 | -151  | C |
| ATOM   | 1535 | C   | GLN | A | 211 | -0.985 | 13.474 | -0.240 | 1.00155.79 |      |       | C |
| ANISOU | 1535 | C   | GLN | A | 211 | 28596  | 15234  | 15364  | -4420      | 2779 | -488  | C |
| ATOM   | 1536 | O   | GLN | A | 211 | -0.674 | 13.031 | 0.865  | 1.00156.29 |      |       | O |
| ANISOU | 1536 | O   | GLN | A | 211 | 27661  | 15660  | 16061  | -4624      | 2748 | -285  | O |
| ATOM   | 1537 | CB  | GLN | A | 211 | -0.104 | 15.784 | -0.598 | 1.00148.29 |      |       | C |
| ANISOU | 1537 | CB  | GLN | A | 211 | 28450  | 14145  | 13748  | -5100      | 3087 | -15   | C |
| ATOM   | 1538 | CG  | GLN | A | 211 | 0.949  | 16.693 | -1.200 | 1.00154.18 |      |       | C |

|        |      |     |     |   |     |        |        |        |            |      |       |   |
|--------|------|-----|-----|---|-----|--------|--------|--------|------------|------|-------|---|
| ANISOU | 1538 | CG  | GLN | A | 211 | 29620  | 14798  | 14161  | -5463      | 3773 | 372   | C |
| ATOM   | 1539 | CD  | GLN | A | 211 | 0.757  | 18.139 | -0.793 | 1.00160.56 |      |       | C |
| ANISOU | 1539 | CD  | GLN | A | 211 | 30794  | 15495  | 14715  | -5894      | 3404 | 462   | C |
| ATOM   | 1540 | OE1 | GLN | A | 211 | -0.286 | 18.508 | -0.253 | 1.00152.64 |      |       | O |
| ANISOU | 1540 | OE1 | GLN | A | 211 | 29917  | 14413  | 13666  | -5819      | 2611 | 178   | O |
| ATOM   | 1541 | NE2 | GLN | A | 211 | 1.765  | 18.966 | -1.047 | 1.00173.28 |      |       | N |
| ANISOU | 1541 | NE2 | GLN | A | 211 | 32571  | 17079  | 16187  | -6356      | 4011 | 844   | N |
| ATOM   | 1542 | N   | ALA | A | 212 | -2.168 | 13.252 | -0.803 | 1.00163.82 |      |       | N |
| ANISOU | 1542 | N   | ALA | A | 212 | 30282  | 15931  | 16032  | -4003      | 2257 | -1005 | N |
| ATOM   | 1543 | CA  | ALA | A | 212 | -3.196 | 12.456 | -0.143 | 1.00163.59 |      |       | C |
| ANISOU | 1543 | CA  | ALA | A | 212 | 29801  | 15953  | 16403  | -3794      | 1664 | -1389 | C |
| ATOM   | 1544 | C   | ALA | A | 212 | -2.762 | 11.003 | -0.005 | 1.00166.32 |      |       | C |
| ANISOU | 1544 | C   | ALA | A | 212 | 29487  | 16438  | 17270  | -3603      | 2101 | -1336 | C |
| ATOM   | 1545 | O   | ALA | A | 212 | -2.886 | 10.408 | 1.065  | 1.00163.00 |      |       | O |
| ANISOU | 1545 | O   | ALA | A | 212 | 28225  | 16262  | 17446  | -3702      | 1932 | -1285 | O |
| ATOM   | 1546 | CB  | ALA | A | 212 | -4.509 | 12.546 | -0.908 | 1.00168.09 |      |       | C |
| ANISOU | 1546 | CB  | ALA | A | 212 | 31232  | 16142  | 16492  | -3386      | 1030 | -1983 | C |
| ATOM   | 1547 | N   | ALA | A | 213 | -2.250 | 10.439 | -1.093 | 1.00173.73 |      |       | N |
| ANISOU | 1547 | N   | ALA | A | 213 | 30863  | 17190  | 17957  | -3319      | 2688 | -1344 | N |
| ATOM   | 1548 | CA  | ALA | A | 213 | -1.822 | 9.045  | -1.105 | 1.00177.03 |      |       | C |
| ANISOU | 1548 | CA  | ALA | A | 213 | 30770  | 17661  | 18831  | -3073      | 3161 | -1318 | C |
| ATOM   | 1549 | C   | ALA | A | 213 | -0.499 | 8.851  | -0.371 | 1.00180.60 |      |       | C |
| ANISOU | 1549 | C   | ALA | A | 213 | 30263  | 18505  | 19851  | -3349      | 3763 | -720  | C |
| ATOM   | 1550 | O   | ALA | A | 213 | -0.242 | 7.784  | 0.188  | 1.00177.71 |      |       | O |
| ANISOU | 1550 | O   | ALA | A | 213 | 29168  | 18285  | 20067  | -3227      | 3941 | -620  | O |
| ATOM   | 1551 | CB  | ALA | A | 213 | -1.713 | 8.537  | -2.533 | 1.00181.72 |      |       | C |
| ANISOU | 1551 | CB  | ALA | A | 213 | 32207  | 17903  | 18936  | -2667      | 3612 | -1554 | C |
| ATOM   | 1552 | N   | SER | A | 214 | 0.333  | 9.888  | -0.366 | 1.00184.77 |      |       | N |
| ANISOU | 1552 | N   | SER | A | 214 | 30792  | 19191  | 20223  | -3722      | 4056 | -326  | N |
| ATOM   | 1553 | CA  | SER | A | 214 | 1.652  | 9.806  | 0.256  | 1.00185.76 |      |       | C |
| ANISOU | 1553 | CA  | SER | A | 214 | 29987  | 19710  | 20882  | -4010      | 4610 | 230   | C |
| ATOM   | 1554 | C   | SER | A | 214 | 1.581  | 9.844  | 1.781  | 1.00176.99 |      |       | C |
| ANISOU | 1554 | C   | SER | A | 214 | 27929  | 18983  | 20337  | -4323      | 4115 | 432   | C |
| ATOM   | 1555 | O   | SER | A | 214 | 2.600  | 9.718  | 2.459  | 1.00181.55 |      |       | O |
| ANISOU | 1555 | O   | SER | A | 214 | 27640  | 19931  | 21409  | -4552      | 4422 | 880   | O |
| ATOM   | 1556 | CB  | SER | A | 214 | 2.567  | 10.921 | -0.260 | 1.00188.98 |      |       | C |
| ANISOU | 1556 | CB  | SER | A | 214 | 30699  | 20146  | 20958  | -4365      | 5110 | 555   | C |
| ATOM   | 1557 | OG  | SER | A | 214 | 2.105  | 12.196 | 0.150  | 1.00184.93 |      |       | O |
| ANISOU | 1557 | OG  | SER | A | 214 | 30488  | 19627  | 20150  | -4751      | 4557 | 542   | O |
| ATOM   | 1558 | N   | LEU | A | 215 | 0.377  | 10.020 | 2.316  | 1.00168.94 |      |       | N |
| ANISOU | 1558 | N   | LEU | A | 215 | 27077  | 17875  | 19236  | -4326      | 3347 | 90    | N |
| ATOM   | 1559 | CA  | LEU | A | 215 | 0.177  | 10.014 | 3.760  | 1.00167.83 |      |       | C |
| ANISOU | 1559 | CA  | LEU | A | 215 | 26154  | 18053  | 19559  | -4602      | 2874 | 228   | C |
| ATOM   | 1560 | C   | LEU | A | 215 | 0.047  | 8.593  | 4.289  | 1.00175.33 |      |       | C |
| ANISOU | 1560 | C   | LEU | A | 215 | 26500  | 19066  | 21051  | -4310      | 2905 | 205   | C |
| ATOM   | 1561 | O   | LEU | A | 215 | -0.694 | 7.780  | 3.735  | 1.00183.49 |      |       | O |
| ANISOU | 1561 | O   | LEU | A | 215 | 27904  | 19791  | 22021  | -3913      | 2857 | -195  | O |
| ATOM   | 1562 | CB  | LEU | A | 215 | -1.064 | 10.825 | 4.139  | 1.00162.64 |      |       | C |
| ANISOU | 1562 | CB  | LEU | A | 215 | 25922  | 17263  | 18613  | -4733      | 2105 | -139  | C |
| ATOM   | 1563 | CG  | LEU | A | 215 | -0.935 | 12.347 | 4.081  | 1.00167.46 |      |       | C |
| ANISOU | 1563 | CG  | LEU | A | 215 | 26961  | 17862  | 18805  | -5126      | 1952 | -35   | C |
| ATOM   | 1564 | CD1 | LEU | A | 215 | -2.231 | 13.015 | 4.516  | 1.00163.71 |      |       | C |
| ANISOU | 1564 | CD1 | LEU | A | 215 | 26841  | 17237  | 18126  | -5168      | 1185 | -432  | C |
| ATOM   | 1565 | CD2 | LEU | A | 215 | 0.225  | 12.813 | 4.944  | 1.00170.45 |      |       | C |
| ANISOU | 1565 | CD2 | LEU | A | 215 | 26596  | 18657  | 19509  | -5633      | 2184 | 500   | C |
| ATOM   | 1566 | N   | ARG | A | 216 | 0.771  | 8.297  | 5.363  | 1.00174.30 |      |       | N |
| ANISOU | 1566 | N   | ARG | A | 216 | 25465  | 19319  | 21443  | -4512      | 2968 | 634   | N |
| ATOM   | 1567 | CA  | ARG | A | 216 | 0.698  | 6.985  | 5.993  | 1.00173.69 |      |       | C |
| ANISOU | 1567 | CA  | ARG | A | 216 | 24816  | 19291  | 21886  | -4252      | 2987 | 687   | C |
| ATOM   | 1568 | C   | ARG | A | 216 | -0.376 | 6.982  | 7.073  | 1.00161.26 |      |       | C |
| ANISOU | 1568 | C   | ARG | A | 216 | 23112  | 17742  | 20417  | -4400      | 2314 | 477   | C |
| ATOM   | 1569 | O   | ARG | A | 216 | -0.452 | 7.905  | 7.884  | 1.00159.24 |      |       | O |
| ANISOU | 1569 | O   | ARG | A | 216 | 22699  | 17716  | 20090  | -4812      | 1928 | 593   | O |
| ATOM   | 1570 | CB  | ARG | A | 216 | 2.050  | 6.600  | 6.592  | 1.00180.02 |      |       | C |
| ANISOU | 1570 | CB  | ARG | A | 216 | 24716  | 20484  | 23198  | -4329      | 3381 | 1280  | C |
| ATOM   | 1571 | CG  | ARG | A | 216 | 3.215  | 6.735  | 5.628  | 1.00191.63 |      |       | C |
| ANISOU | 1571 | CG  | ARG | A | 216 | 26188  | 21990  | 24632  | -4258      | 4107 | 1522  | C |
| ATOM   | 1572 | CD  | ARG | A | 216 | 4.491  | 6.163  | 6.222  | 1.00203.92 |      |       | C |
| ANISOU | 1572 | CD  | ARG | A | 216 | 26745  | 23929  | 26805  | -4237      | 4474 | 2064  | C |
| ATOM   | 1573 | NE  | ARG | A | 216 | 4.378  | 4.730  | 6.473  | 1.00215.42 |      |       | N |



|        |      |     |     |   |     |        |        |        |            |      |      |   |
|--------|------|-----|-----|---|-----|--------|--------|--------|------------|------|------|---|
| ANISOU | 1573 | NE  | ARG | A | 216 | 27889  | 25272  | 28690  | -3767      | 4582 | 2071 | N |
| ATOM   | 1574 | CZ  | ARG | A | 216 | 4.673  | 3.791  | 5.579  | 1.00231.01 |      |      | C |
| ANISOU | 1574 | CZ  | ARG | A | 216 | 30011  | 26982  | 30779  | -3284      | 5185 | 1989 | C |
| ATOM   | 1575 | NH1 | ARG | A | 216 | 5.100  | 4.133  | 4.371  | 1.00241.43 |      |      | N |
| ANISOU | 1575 | NH1 | ARG | A | 216 | 31797  | 28148  | 31790  | -3209      | 5749 | 1895 | N |
| ATOM   | 1576 | NH2 | ARG | A | 216 | 4.540  | 2.509  | 5.892  | 1.00233.50 |      |      | N |
| ANISOU | 1576 | NH2 | ARG | A | 216 | 30062  | 27157  | 31499  | -2879      | 5254 | 2001 | N |
| ATOM   | 1577 | N   | THR | A | 217 | -1.206 | 5.945  | 7.077  | 1.00150.16 |      |      | N |
| ANISOU | 1577 | N   | THR | A | 217 | 21790  | 16081  | 19184  | -4083      | 2212 | 148  | N |
| ATOM   | 1578 | CA  | THR | A | 217 | -2.286 | 5.843  | 8.050  | 1.00138.47 |      |      | C |
| ANISOU | 1578 | CA  | THR | A | 217 | 20197  | 14583  | 17832  | -4213      | 1663 | -95  | C |
| ATOM   | 1579 | C   | THR | A | 217 | -1.727 | 5.808  | 9.468  | 1.00140.20 |      |      | C |
| ANISOU | 1579 | C   | THR | A | 217 | 19662  | 15199  | 18408  | -4507      | 1550 | 391  | C |
| ATOM   | 1580 | O   | THR | A | 217 | -2.323 | 6.356  | 10.394 | 1.00142.63 |      |      | O |
| ANISOU | 1580 | O   | THR | A | 217 | 19893  | 15627  | 18672  | -4816      | 1091 | 322  | O |
| ATOM   | 1581 | CB  | THR | A | 217 | -3.155 | 4.597  | 7.803  | 1.00133.92 |      |      | C |
| ANISOU | 1581 | CB  | THR | A | 217 | 19771  | 13650  | 17465  | -3848      | 1676 | -505 | C |
| ATOM   | 1582 | OG1 | THR | A | 217 | -3.560 | 4.561  | 6.428  | 1.00142.37 |      |      | O |
| ANISOU | 1582 | OG1 | THR | A | 217 | 21548  | 14365  | 18180  | -3554      | 1779 | -947 | O |
| ATOM   | 1583 | CG2 | THR | A | 217 | -4.389 | 4.620  | 8.695  | 1.00115.69 |      |      | C |
| ANISOU | 1583 | CG2 | THR | A | 217 | 17410  | 11287  | 15258  | -4021      | 1142 | -836 | C |
| ATOM   | 1584 | N   | SER | A | 218 | -0.569 | 5.175  | 9.625  | 1.00146.87 |      |      | N |
| ANISOU | 1584 | N   | SER | A | 218 | 19964  | 16246  | 19592  | -4393      | 1965 | 877  | N |
| ATOM   | 1585 | CA  | SER | A | 218 | 0.094  | 5.103  | 10.921 | 1.00150.99 |      |      | C |
| ANISOU | 1585 | CA  | SER | A | 218 | 19763  | 17170  | 20436  | -4628      | 1831 | 1383 | C |
| ATOM   | 1586 | C   | SER | A | 218 | 0.569  | 6.478  | 11.383 | 1.00148.48 |      |      | C |
| ANISOU | 1586 | C   | SER | A | 218 | 19315  | 17208  | 19894  | -5140      | 1573 | 1603 | C |
| ATOM   | 1587 | O   | SER | A | 218 | 0.697  | 6.726  | 12.582 | 1.00148.20 |      |      | O |
| ANISOU | 1587 | O   | SER | A | 218 | 18872  | 17474  | 19962  | -5450      | 1233 | 1855 | O |
| ATOM   | 1588 | CB  | SER | A | 218 | 1.270  | 4.127  | 10.869 | 1.00158.85 |      |      | C |
| ANISOU | 1588 | CB  | SER | A | 218 | 20192  | 18292  | 21870  | -4320      | 2321 | 1845 | C |
| ATOM   | 1589 | OG  | SER | A | 218 | 2.179  | 4.483  | 9.844  | 1.00168.26 |      |      | O |
| ANISOU | 1589 | OG  | SER | A | 218 | 21429  | 19527  | 22976  | -4249      | 2795 | 1962 | O |
| ATOM   | 1590 | N   | ASP | A | 219 | 0.832  | 7.368  | 10.429 | 1.00145.23 |      |      | N |
| ANISOU | 1590 | N   | ASP | A | 219 | 19300  | 16734  | 19148  | -5239      | 1745 | 1504 | N |
| ATOM   | 1591 | CA  | ASP | A | 219 | 1.233  | 8.733  | 10.752 | 1.00145.55 |      |      | C |
| ANISOU | 1591 | CA  | ASP | A | 219 | 19322  | 17028  | 18950  | -5752      | 1537 | 1662 | C |
| ATOM   | 1592 | C   | ASP | A | 219 | 0.042  | 9.533  | 11.259 | 1.00143.34 |      |      | C |
| ANISOU | 1592 | C   | ASP | A | 219 | 19480  | 16629  | 18352  | -6004      | 959  | 1286 | C |
| ATOM   | 1593 | O   | ASP | A | 219 | 0.187  | 10.409 | 12.112 | 1.00152.98 |      |      | O |
| ANISOU | 1593 | O   | ASP | A | 219 | 20536  | 18098  | 19491  | -6455      | 638  | 1431 | O |
| ATOM   | 1594 | CB  | ASP | A | 219 | 1.847  | 9.427  | 9.535  | 1.00148.48 |      |      | C |
| ANISOU | 1594 | CB  | ASP | A | 219 | 20072  | 17300  | 19043  | -5784      | 1962 | 1673 | C |
| ATOM   | 1595 | CG  | ASP | A | 219 | 3.240  | 8.926  | 9.220  | 1.00163.59 |      |      | C |
| ANISOU | 1595 | CG  | ASP | A | 219 | 21403  | 19441  | 21314  | -5676      | 2561 | 2116 | C |
| ATOM   | 1596 | OD1 | ASP | A | 219 | 3.931  | 8.462  | 10.151 | 1.00160.12 |      |      | O |
| ANISOU | 1596 | OD1 | ASP | A | 219 | 20162  | 19361  | 21317  | -5741      | 2511 | 2510 | O |
| ATOM   | 1597 | OD2 | ASP | A | 219 | 3.645  | 9.002  | 8.040  | 1.00178.81 |      |      | O |
| ANISOU | 1597 | OD2 | ASP | A | 219 | 23681  | 21186  | 23075  | -5513      | 3084 | 2068 | O |
| ATOM   | 1598 | N   | LEU | A | 220 | -1.135 | 9.227  | 10.726 | 1.00128.53 |      |      | N |
| ANISOU | 1598 | N   | LEU | A | 220 | 18152  | 14369  | 16316  | -5709      | 828  | 779  | N |
| ATOM   | 1599 | CA  | LEU | A | 220 | -2.357 | 9.889  | 11.160 | 1.00121.15 |      |      | C |
| ANISOU | 1599 | CA  | LEU | A | 220 | 17588  | 13295  | 15149  | -5869      | 301  | 367  | C |
| ATOM   | 1600 | C   | LEU | A | 220 | -2.727 | 9.461  | 12.574 | 1.00129.57 |      |      | C |
| ANISOU | 1600 | C   | LEU | A | 220 | 18187  | 14550  | 16494  | -6034      | 11   | 449  | C |
| ATOM   | 1601 | O   | LEU | A | 220 | -3.122 | 10.287 | 13.397 | 1.00138.18 |      |      | O |
| ANISOU | 1601 | O   | LEU | A | 220 | 19308  | 15753  | 17442  | -6386      | -364 | 386  | O |
| ATOM   | 1602 | CB  | LEU | A | 220 | -3.500 | 9.594  | 10.190 | 1.00116.06 |      |      | C |
| ANISOU | 1602 | CB  | LEU | A | 220 | 17565  | 12211  | 14321  | -5482      | 216  | -215 | C |
| ATOM   | 1603 | CG  | LEU | A | 220 | -3.381 | 10.283 | 8.830  | 1.00133.20 |      |      | C |
| ANISOU | 1603 | CG  | LEU | A | 220 | 20415  | 14146  | 16047  | -5351      | 366  | -371 | C |
| ATOM   | 1604 | CD1 | LEU | A | 220 | -4.414 | 9.734  | 7.858  | 1.00144.74 |      |      | C |
| ANISOU | 1604 | CD1 | LEU | A | 220 | 22430  | 15200  | 17364  | -4904      | 269  | -927 | C |
| ATOM   | 1605 | CD2 | LEU | A | 220 | -3.520 | 11.796 | 8.980  | 1.00136.05 |      |      | C |
| ANISOU | 1605 | CD2 | LEU | A | 220 | 21131  | 14527  | 16032  | -5711      | 50   | -400 | C |
| ATOM   | 1606 | N   | ARG | A | 221 | -2.592 | 8.167  | 12.852 | 1.00127.27 |      |      | N |
| ANISOU | 1606 | N   | ARG | A | 221 | 17516  | 14262  | 16577  | -5773      | 215  | 594  | N |
| ATOM   | 1607 | CA  | ARG | A | 221 | -2.815 | 7.650  | 14.195 | 1.00126.23 |      |      | C |
| ANISOU | 1607 | CA  | ARG | A | 221 | 16972  | 14296  | 16693  | -5910      | 14   | 754  | C |
| ATOM   | 1608 | C   | ARG | A | 221 | -1.846 | 8.312  | 15.161 | 1.00136.86 |      |      | C |

|        |      |     |     |   |     |        |        |        |            |       |      |   |
|--------|------|-----|-----|---|-----|--------|--------|--------|------------|-------|------|---|
| ANISOU | 1608 | C   | ARG | A | 221 | 17881  | 16096  | 18025  | -6330      | -136  | 1253 | C |
| ATOM   | 1609 | O   | ARG | A | 221 | -2.203 | 8.636  | 16.292 | 1.00155.79 |       |      | O |
| ANISOU | 1609 | O   | ARG | A | 221 | 20184  | 18646  | 20364  | -6637      | -475  | 1276 | O |
| ATOM   | 1610 | CB  | ARG | A | 221 | -2.616 | 6.134  | 14.236 | 1.00131.87 |       |      | C |
| ANISOU | 1610 | CB  | ARG | A | 221 | 17383  | 14911  | 17812  | -5532      | 328   | 919  | C |
| ATOM   | 1611 | CG  | ARG | A | 221 | -3.459 | 5.354  | 13.243 | 1.00143.46 |       |      | C |
| ANISOU | 1611 | CG  | ARG | A | 221 | 19253  | 15922  | 19332  | -5127      | 508   | 429  | C |
| ATOM   | 1612 | CD  | ARG | A | 221 | -3.385 | 3.862  | 13.525 | 1.00157.10 |       |      | C |
| ANISOU | 1612 | CD  | ARG | A | 221 | 20703  | 17508  | 21481  | -4820      | 785   | 578  | C |
| ATOM   | 1613 | NE  | ARG | A | 221 | -4.005 | 3.531  | 14.804 | 1.00166.48 |       |      | N |
| ANISOU | 1613 | NE  | ARG | A | 221 | 21709  | 18730  | 22816  | -5012      | 550   | 605  | N |
| ATOM   | 1614 | CZ  | ARG | A | 221 | -5.210 | 2.984  | 14.930 | 1.00174.68 |       |      | C |
| ANISOU | 1614 | CZ  | ARG | A | 221 | 22965  | 19442  | 23964  | -4959      | 484   | 151  | C |
| ATOM   | 1615 | NH1 | ARG | A | 221 | -5.924 | 2.690  | 13.851 | 1.00168.18 |       |      | N |
| ANISOU | 1615 | NH1 | ARG | A | 221 | 22519  | 18250  | 23131  | -4711      | 567   | -380 | N |
| ATOM   | 1616 | NH2 | ARG | A | 221 | -5.698 | 2.721  | 16.135 | 1.00183.43 |       |      | N |
| ANISOU | 1616 | NH2 | ARG | A | 221 | 23918  | 20589  | 25188  | -5170      | 343   | 218  | N |
| ATOM   | 1617 | N   | LYS | A | 222 | -0.616 | 8.514  | 14.700 | 1.00133.74 |       |      | N |
| ANISOU | 1617 | N   | LYS | A | 222 | 17220  | 15912  | 17683  | -6356      | 131   | 1629 | N |
| ATOM   | 1618 | CA  | LYS | A | 222 | 0.427  | 9.120  | 15.516 | 1.00140.04 |       |      | C |
| ANISOU | 1618 | CA  | LYS | A | 222 | 17527  | 17164  | 18517  | -6766      | -12   | 2097 | C |
| ATOM   | 1619 | C   | LYS | A | 222 | 0.046  | 10.541 | 15.917 | 1.00143.26 |       |      | C |
| ANISOU | 1619 | C   | LYS | A | 222 | 18260  | 17630  | 18544  | -7268      | -396  | 1909 | C |
| ATOM   | 1620 | O   | LYS | A | 222 | 0.251  | 10.947 | 17.061 | 1.00140.22 |       |      | O |
| ANISOU | 1620 | O   | LYS | A | 222 | 17615  | 17539  | 18123  | -7649      | -729  | 2106 | O |
| ATOM   | 1621 | CB  | LYS | A | 222 | 1.756  | 9.118  | 14.757 | 1.00148.60 |       |      | C |
| ANISOU | 1621 | CB  | LYS | A | 222 | 18267  | 18423  | 19771  | -6699      | 414   | 2452 | C |
| ATOM   | 1622 | CG  | LYS | A | 222 | 2.980  | 9.322  | 15.632 | 1.00161.39 |       |      | C |
| ANISOU | 1622 | CG  | LYS | A | 222 | 19151  | 20554  | 21615  | -7016      | 299   | 2991 | C |
| ATOM   | 1623 | CD  | LYS | A | 222 | 4.256  | 9.198  | 14.815 | 1.00172.33 |       |      | C |
| ANISOU | 1623 | CD  | LYS | A | 222 | 20117  | 22094  | 23265  | -6899      | 801   | 3304 | C |
| ATOM   | 1624 | CE  | LYS | A | 222 | 4.332  | 7.849  | 14.117 | 1.00171.35 |       |      | C |
| ANISOU | 1624 | CE  | LYS | A | 222 | 19913  | 21743  | 23451  | -6261      | 1270  | 3324 | C |
| ATOM   | 1625 | NZ  | LYS | A | 222 | 5.545  | 7.729  | 13.263 | 1.00172.40 |       |      | N |
| ANISOU | 1625 | NZ  | LYS | A | 222 | 19660  | 21999  | 23848  | -6117      | 1842  | 3590 | N |
| ATOM   | 1626 | N   | MET | A | 223 | -0.521 | 11.287 | 14.973 | 1.00146.61 |       |      | N |
| ANISOU | 1626 | N   | MET | A | 223 | 19299  | 17748  | 18658  | -7247      | -362  | 1521 | N |
| ATOM   | 1627 | CA  | MET | A | 223 | -0.940 | 12.659 | 15.240 | 1.00138.50 |       |      | C |
| ANISOU | 1627 | CA  | MET | A | 223 | 18669  | 16690  | 17266  | -7664      | -698  | 1311 | C |
| ATOM   | 1628 | C   | MET | A | 223 | -2.168 | 12.703 | 16.144 | 1.00127.49 |       |      | C |
| ANISOU | 1628 | C   | MET | A | 223 | 17461  | 15189  | 15788  | -7725      | -1096 | 968  | C |
| ATOM   | 1629 | O   | MET | A | 223 | -2.227 | 13.502 | 17.079 | 1.00126.48 |       |      | O |
| ANISOU | 1629 | O   | MET | A | 223 | 17328  | 15225  | 15503  | -8147      | -1409 | 993  | O |
| ATOM   | 1630 | CB  | MET | A | 223 | -1.219 | 13.414 | 13.939 | 1.00128.68 |       |      | C |
| ANISOU | 1630 | CB  | MET | A | 223 | 18093  | 15103  | 15695  | -7558      | -557  | 1013 | C |
| ATOM   | 1631 | CG  | MET | A | 223 | -1.573 | 14.877 | 14.156 | 1.00122.04 |       |      | C |
| ANISOU | 1631 | CG  | MET | A | 223 | 17708  | 14180  | 14483  | -7964      | -873  | 829  | C |
| ATOM   | 1632 | SD  | MET | A | 223 | -1.777 | 15.813 | 12.632 | 1.00204.48 |       |      | S |
| ANISOU | 1632 | SD  | MET | A | 223 | 29008  | 24195  | 24492  | -7832      | -709  | 569  | S |
| ATOM   | 1633 | CE  | MET | A | 223 | -1.814 | 17.480 | 13.282 | 1.00113.72 |       |      | C |
| ANISOU | 1633 | CE  | MET | A | 223 | 17833  | 12698  | 12676  | -8428      | -1052 | 537  | C |
| ATOM   | 1634 | N   | VAL | A | 224 | -3.145 | 11.848 | 15.861 | 1.00106.80 |       |      | N |
| ANISOU | 1634 | N   | VAL | A | 224 | 15007  | 12286  | 13285  | -7323      | -1059 | 627  | N |
| ATOM   | 1635 | CA  | VAL | A | 224 | -4.354 | 11.776 | 16.676 | 1.00103.89 |       |      | C |
| ANISOU | 1635 | CA  | VAL | A | 224 | 14763  | 11800  | 12911  | -7363      | -1350 | 271  | C |
| ATOM   | 1636 | C   | VAL | A | 224 | -4.050 | 11.313 | 18.105 | 1.00113.26 |       |      | C |
| ANISOU | 1636 | C   | VAL | A | 224 | 15483  | 13299  | 14251  | -7602      | -1456 | 613  | C |
| ATOM   | 1637 | O   | VAL | A | 224 | -4.650 | 11.801 | 19.065 | 1.00117.87 |       |      | O |
| ANISOU | 1637 | O   | VAL | A | 224 | 16140  | 13954  | 14691  | -7703      | -1688 | 454  | O |
| ATOM   | 1638 | CB  | VAL | A | 224 | -5.420 | 10.867 | 16.027 | 1.00104.76 |       |      | C |
| ANISOU | 1638 | CB  | VAL | A | 224 | 15080  | 11542  | 13183  | -6906      | -1256 | -179 | C |
| ATOM   | 1639 | CG1 | VAL | A | 224 | -6.603 | 10.663 | 16.963 | 1.00100.05 |       |      | C |
| ANISOU | 1639 | CG1 | VAL | A | 224 | 14486  | 10852  | 12677  | -6978      | -1474 | -518 | C |
| ATOM   | 1640 | CG2 | VAL | A | 224 | -5.884 | 11.460 | 14.707 | 1.00102.12 |       |      | C |
| ANISOU | 1640 | CG2 | VAL | A | 224 | 15306  | 10892  | 12602  | -6680      | -1282 | -577 | C |
| ATOM   | 1641 | N   | ASP | A | 225 | -3.107 | 10.385 | 18.245 | 1.00119.97 |       |      | N |
| ANISOU | 1641 | N   | ASP | A | 225 | 15857  | 14357  | 15369  | -7470      | -1241 | 1080 | N |
| ATOM   | 1642 | CA  | ASP | A | 225 | -2.698 | 9.916  | 19.567 | 1.00124.05 |       |      | C |
| ANISOU | 1642 | CA  | ASP | A | 225 | 15958  | 15178  | 15996  | -7653      | -1377 | 1474 | C |
| ATOM   | 1643 | C   | ASP | A | 225 | -2.087 | 11.048 | 20.385 | 1.00126.95 |       |      | C |

|        |      |     |     |   |     |        |        |        |            |       |       |   |
|--------|------|-----|-----|---|-----|--------|--------|--------|------------|-------|-------|---|
| ANISOU | 1643 | C   | ASP | A | 225 | 16230  | 15898  | 16107  | -8182      | -1696 | 1695  | C |
| ATOM   | 1644 | O   | ASP | A | 225 | -2.134 | 11.033 | 21.616 | 1.00138.21 |       |       | O |
| ANISOU | 1644 | O   | ASP | A | 225 | 17547  | 17535  | 17432  | -8234      | -1904 | 1808  | O |
| ATOM   | 1645 | CB  | ASP | A | 225 | -1.720 | 8.744  | 19.461 | 1.00137.27 |       |       | C |
| ANISOU | 1645 | CB  | ASP | A | 225 | 17136  | 16995  | 18027  | -7343      | -1106 | 1955  | C |
| ATOM   | 1646 | CG  | ASP | A | 225 | -2.425 | 7.411  | 19.287 | 1.00158.67 |       |       | C |
| ANISOU | 1646 | CG  | ASP | A | 225 | 19905  | 19377  | 21005  | -6905      | -865  | 1796  | C |
| ATOM   | 1647 | OD1 | ASP | A | 225 | -3.574 | 7.403  | 18.798 | 1.00160.21 |       |       | O |
| ANISOU | 1647 | OD1 | ASP | A | 225 | 20512  | 19213  | 21148  | -6784      | -836  | 1260  | O |
| ATOM   | 1648 | OD2 | ASP | A | 225 | -1.831 | 6.371  | 19.643 | 1.00175.54 |       |       | O |
| ANISOU | 1648 | OD2 | ASP | A | 225 | 21674  | 21602  | 23422  | -6681      | -717  | 2200  | O |
| ATOM   | 1649 | N   | MET | A | 226 | -1.513 | 12.027 | 19.694 | 1.00118.11 |       |       | N |
| ANISOU | 1649 | N   | MET | A | 226 | 15207  | 14832  | 14838  | -8312      | -1666 | 1695  | N |
| ATOM   | 1650 | CA  | MET | A | 226 | -1.012 | 13.224 | 20.352 | 1.00112.08 |       |       | C |
| ANISOU | 1650 | CA  | MET | A | 226 | 14445  | 14346  | 13796  | -8500      | -1891 | 1755  | C |
| ATOM   | 1651 | C   | MET | A | 226 | -2.170 | 14.080 | 20.836 | 1.00124.85 |       |       | C |
| ANISOU | 1651 | C   | MET | A | 226 | 16570  | 15789  | 15080  | -8365      | -2068 | 1279  | C |
| ATOM   | 1652 | O   | MET | A | 226 | -2.258 | 14.415 | 22.017 | 1.00126.88 |       |       | O |
| ANISOU | 1652 | O   | MET | A | 226 | 16813  | 16235  | 15159  | -8427      | -2268 | 1308  | O |
| ATOM   | 1653 | CB  | MET | A | 226 | -0.148 | 14.045 | 19.397 | 1.00114.38 |       |       | C |
| ANISOU | 1653 | CB  | MET | A | 226 | 14753  | 14668  | 14039  | -8696      | -1737 | 1861  | C |
| ATOM   | 1654 | CG  | MET | A | 226 | 0.151  | 15.446 | 19.909 | 1.00115.74 |       |       | C |
| ANISOU | 1654 | CG  | MET | A | 226 | 15091  | 14993  | 13893  | -8893      | -1944 | 1796  | C |
| ATOM   | 1655 | SD  | MET | A | 226 | 0.821  | 16.537 | 18.645 | 1.00119.80 |       |       | S |
| ANISOU | 1655 | SD  | MET | A | 226 | 15851  | 15376  | 14290  | -9125      | -1704 | 1792  | S |
| ATOM   | 1656 | CE  | MET | A | 226 | 2.278  | 15.620 | 18.163 | 1.00170.87 |       |       | C |
| ANISOU | 1656 | CE  | MET | A | 226 | 21562  | 22141  | 21220  | -9269      | -1372 | 2346  | C |
| ATOM   | 1657 | N   | LEU | A | 227 | -3.060 | 14.423 | 19.910 | 1.00121.51 |       |       | N |
| ANISOU | 1657 | N   | LEU | A | 227 | 16595  | 14999  | 14575  | -8169      | -1985 | 856   | N |
| ATOM   | 1658 | CA  | LEU | A | 227 | -4.166 | 15.334 | 20.187 | 1.00130.71 |       |       | C |
| ANISOU | 1658 | CA  | LEU | A | 227 | 18187  | 15988  | 15490  | -7970      | -2109 | 422   | C |
| ATOM   | 1659 | C   | LEU | A | 227 | -5.135 | 14.799 | 21.242 | 1.00128.25 |       |       | C |
| ANISOU | 1659 | C   | LEU | A | 227 | 17823  | 15666  | 15240  | -7776      | -2155 | 241   | C |
| ATOM   | 1660 | O   | LEU | A | 227 | -5.887 | 15.563 | 21.846 | 1.00131.49 |       |       | O |
| ANISOU | 1660 | O   | LEU | A | 227 | 18450  | 16032  | 15478  | -7660      | -2228 | -9    | O |
| ATOM   | 1661 | CB  | LEU | A | 227 | -4.925 | 15.660 | 18.896 | 1.00137.37 |       |       | C |
| ANISOU | 1661 | CB  | LEU | A | 227 | 19474  | 16439  | 16281  | -7744      | -2048 | 30    | C |
| ATOM   | 1662 | CG  | LEU | A | 227 | -4.446 | 16.817 | 18.010 | 1.00135.84 |       |       | C |
| ANISOU | 1662 | CG  | LEU | A | 227 | 19645  | 16141  | 15828  | -7903      | -2038 | 42    | C |
| ATOM   | 1663 | CD1 | LEU | A | 227 | -2.971 | 16.695 | 17.643 | 1.00132.21 |       |       | C |
| ANISOU | 1663 | CD1 | LEU | A | 227 | 18908  | 15890  | 15438  | -8296      | -1878 | 503   | C |
| ATOM   | 1664 | CD2 | LEU | A | 227 | -5.303 | 16.906 | 16.750 | 1.00133.04 |       |       | C |
| ANISOU | 1664 | CD2 | LEU | A | 227 | 19788  | 15361  | 15400  | -7624      | -2026 | -354  | C |
| ATOM   | 1665 | N   | GLN | A | 228 | -5.113 | 13.490 | 21.467 | 1.00122.00 |       |       | N |
| ANISOU | 1665 | N   | GLN | A | 228 | 16750  | 14891  | 14713  | -7762      | -2069 | 386   | N |
| ATOM   | 1666 | CA  | GLN | A | 228 | -6.051 | 12.878 | 22.401 | 1.00123.51 |       |       | C |
| ANISOU | 1666 | CA  | GLN | A | 228 | 16926  | 15022  | 14979  | -7628      | -2049 | 215   | C |
| ATOM   | 1667 | C   | GLN | A | 228 | -5.371 | 12.159 | 23.561 | 1.00129.21 |       |       | C |
| ANISOU | 1667 | C   | GLN | A | 228 | 17351  | 16029  | 15714  | -7874      | -2111 | 665   | C |
| ATOM   | 1668 | O   | GLN | A | 228 | -4.582 | 11.236 | 23.354 | 1.00136.48 |       |       | O |
| ANISOU | 1668 | O   | GLN | A | 228 | 17956  | 17037  | 16863  | -7983      | -2059 | 1050  | O |
| ATOM   | 1669 | CB  | GLN | A | 228 | -6.983 | 11.914 | 21.664 | 1.00127.12 |       |       | C |
| ANISOU | 1669 | CB  | GLN | A | 228 | 17423  | 15132  | 15744  | -7359      | -1880 | -120  | C |
| ATOM   | 1670 | CG  | GLN | A | 228 | -7.884 | 12.587 | 20.645 | 1.00126.91 |       |       | C |
| ANISOU | 1670 | CG  | GLN | A | 228 | 17708  | 14820  | 15691  | -7055      | -1898 | -621  | C |
| ATOM   | 1671 | CD  | GLN | A | 228 | -8.911 | 11.641 | 20.061 | 1.00117.03 |       |       | C |
| ANISOU | 1671 | CD  | GLN | A | 228 | 16466  | 13247  | 14752  | -6766      | -1787 | -1018 | C |
| ATOM   | 1672 | OE1 | GLN | A | 228 | -9.962 | 12.067 | 19.583 | 1.00113.13 |       |       | O |
| ANISOU | 1672 | OE1 | GLN | A | 228 | 16131  | 12550  | 14302  | -6438      | -1850 | -1481 | O |
| ATOM   | 1673 | NE2 | GLN | A | 228 | -8.612 | 10.349 | 20.097 | 1.00114.39 |       |       | N |
| ANISOU | 1673 | NE2 | GLN | A | 228 | 15935  | 12859  | 14670  | -6875      | -1629 | -830  | N |
| ATOM   | 1674 | N   | ASP | A | 229 | -5.691 | 12.597 | 24.776 | 1.00131.61 |       |       | N |
| ANISOU | 1674 | N   | ASP | A | 229 | 17775  | 16464  | 15767  | -7963      | -2223 | 637   | N |
| ATOM   | 1675 | CA  | ASP | A | 229 | -5.273 | 11.921 | 26.001 | 1.00142.65 |       |       | C |
| ANISOU | 1675 | CA  | ASP | A | 229 | 19013  | 18094  | 17094  | -8208      | -2326 | 1018  | C |
| ATOM   | 1676 | C   | ASP | A | 229 | -3.768 | 11.696 | 26.078 | 1.00137.45 |       |       | C |
| ANISOU | 1676 | C   | ASP | A | 229 | 17972  | 17786  | 16467  | -8468      | -2515 | 1605  | C |
| ATOM   | 1677 | O   | ASP | A | 229 | -3.304 | 10.575 | 26.284 | 1.00127.97 |       |       | O |
| ANISOU | 1677 | O   | ASP | A | 229 | 16471  | 16662  | 15491  | -8543      | -2511 | 2003  | O |
| ATOM   | 1678 | CB  | ASP | A | 229 | -6.011 | 10.588 | 26.152 | 1.00150.09 |       |       | C |

|        |      |     |     |   |     |        |        |        |            |       |      |   |
|--------|------|-----|-----|---|-----|--------|--------|--------|------------|-------|------|---|
| ANISOU | 1678 | CB  | ASP | A | 229 | 19915  | 18799  | 18311  | -8108      | -2116 | 959  | C |
| ATOM   | 1679 | CG  | ASP | A | 229 | -7.512 | 10.736 | 26.011 | 1.00145.44 |       |      | C |
| ANISOU | 1679 | CG  | ASP | A | 229 | 19584  | 17879  | 17797  | -7833      | -1917 | 355  | C |
| ATOM   | 1680 | OD1 | ASP | A | 229 | -8.046 | 11.800 | 26.393 | 1.00145.11 |       |      | O |
| ANISOU | 1680 | OD1 | ASP | A | 229 | 19762  | 17856  | 17516  | -7783      | -1972 | 81   | O |
| ATOM   | 1681 | OD2 | ASP | A | 229 | -8.155 | 9.789  | 25.510 | 1.00138.79 |       |      | O |
| ANISOU | 1681 | OD2 | ASP | A | 229 | 18690  | 16751  | 17291  | -7662      | -1701 | 160  | O |
| ATOM   | 1682 | N   | SER | A | 230 | -3.009 | 12.769 | 25.902 | 1.00142.79 |       |      | N |
| ANISOU | 1682 | N   | SER | A | 230 | 18627  | 18665  | 16963  | -8597      | -2666 | 1677 | N |
| ATOM   | 1683 | CA  | SER | A | 230 | -1.561 | 12.689 | 26.001 | 1.00152.49 |       |      | C |
| ANISOU | 1683 | CA  | SER | A | 230 | 19410  | 20267  | 18263  | -8844      | -2856 | 2201 | C |
| ATOM   | 1684 | C   | SER | A | 230 | -1.007 | 13.956 | 26.638 | 1.00160.90 |       |      | C |
| ANISOU | 1684 | C   | SER | A | 230 | 20579  | 21586  | 18970  | -9092      | -3109 | 2227 | C |
| ATOM   | 1685 | O   | SER | A | 230 | -0.379 | 13.905 | 27.692 | 1.00173.07 |       |      | O |
| ANISOU | 1685 | O   | SER | A | 230 | 21959  | 23451  | 20350  | -9352      | -3406 | 2555 | O |
| ATOM   | 1686 | CB  | SER | A | 230 | -0.941 | 12.455 | 24.622 | 1.00148.88 |       |      | C |
| ANISOU | 1686 | CB  | SER | A | 230 | 18671  | 19747  | 18150  | -8757      | -2644 | 2306 | C |
| ATOM   | 1687 | OG  | SER | A | 230 | -1.402 | 11.237 | 24.063 | 1.00142.48 |       |      | O |
| ANISOU | 1687 | OG  | SER | A | 230 | 17777  | 18683  | 17676  | -8554      | -2398 | 2311 | O |
| ATOM   | 1688 | N   | PHE | A | 231 | -1.258 | 15.094 | 26.002 | 1.00154.07 |       |      | N |
| ANISOU | 1688 | N   | PHE | A | 231 | 20013  | 20553  | 17974  | -9029      | -3006 | 1891 | N |
| ATOM   | 1689 | CA  | PHE | A | 231 | -0.783 | 16.376 | 26.506 | 1.00159.62 |       |      | C |
| ANISOU | 1689 | CA  | PHE | A | 231 | 20866  | 21417  | 18364  | -9268      | -3184 | 1882 | C |
| ATOM   | 1690 | C   | PHE | A | 231 | -1.894 | 17.116 | 27.255 | 1.00167.49 |       |      | C |
| ANISOU | 1690 | C   | PHE | A | 231 | 22379  | 22231  | 19029  | -9196      | -3175 | 1515 | C |
| ATOM   | 1691 | O   | PHE | A | 231 | -3.068 | 16.989 | 26.906 | 1.00179.43 |       |      | O |
| ANISOU | 1691 | O   | PHE | A | 231 | 24146  | 23427  | 20602  | -8897      | -2970 | 1157 | O |
| ATOM   | 1692 | CB  | PHE | A | 231 | -0.242 | 17.228 | 25.354 | 1.00161.47 |       |      | C |
| ANISOU | 1692 | CB  | PHE | A | 231 | 21106  | 21571  | 18673  | -9309      | -3055 | 1813 | C |
| ATOM   | 1693 | CG  | PHE | A | 231 | 1.011  | 16.678 | 24.728 | 1.00167.19 |       |      | C |
| ANISOU | 1693 | CG  | PHE | A | 231 | 21266  | 22527  | 19732  | -9447      | -3023 | 2204 | C |
| ATOM   | 1694 | CD1 | PHE | A | 231 | 2.248  | 17.223 | 25.030 | 1.00171.35 |       |      | C |
| ANISOU | 1694 | CD1 | PHE | A | 231 | 21459  | 23386  | 20260  | -9772      | -3193 | 2481 | C |
| ATOM   | 1695 | CD2 | PHE | A | 231 | 0.953  | 15.614 | 23.842 | 1.00172.98 |       |      | C |
| ANISOU | 1695 | CD2 | PHE | A | 231 | 21770  | 23139  | 20815  | -9253      | -2793 | 2291 | C |
| ATOM   | 1696 | CE1 | PHE | A | 231 | 3.402  | 16.719 | 24.458 | 1.00179.13 |       |      | C |
| ANISOU | 1696 | CE1 | PHE | A | 231 | 21833  | 24603  | 21627  | -9873      | -3114 | 2840 | C |
| ATOM   | 1697 | CE2 | PHE | A | 231 | 2.104  | 15.105 | 23.269 | 1.00179.97 |       |      | C |
| ANISOU | 1697 | CE2 | PHE | A | 231 | 22089  | 24237  | 22053  | -9355      | -2687 | 2677 | C |
| ATOM   | 1698 | CZ  | PHE | A | 231 | 3.329  | 15.659 | 23.578 | 1.00182.96 |       |      | C |
| ANISOU | 1698 | CZ  | PHE | A | 231 | 22078  | 24971  | 22466  | -9650      | -2838 | 2954 | C |
| ATOM   | 1699 | N   | PRO | A | 232 | -1.526 | 17.888 | 28.293 | 1.00162.11 |       |      | N |
| ANISOU | 1699 | N   | PRO | A | 232 | 21822  | 21749  | 18025  | -9477      | -3388 | 1600 | N |
| ATOM   | 1700 | CA  | PRO | A | 232 | -2.476 | 18.653 | 29.114 | 1.00153.79 |       |      | C |
| ANISOU | 1700 | CA  | PRO | A | 232 | 21234  | 20543  | 16657  | -9460      | -3353 | 1295 | C |
| ATOM   | 1701 | C   | PRO | A | 232 | -3.050 | 19.868 | 28.390 | 1.00142.78 |       |      | C |
| ANISOU | 1701 | C   | PRO | A | 232 | 20174  | 18846  | 15230  | -9288      | -3175 | 927  | C |
| ATOM   | 1702 | O   | PRO | A | 232 | -3.188 | 20.933 | 28.997 | 1.00132.81 |       |      | O |
| ANISOU | 1702 | O   | PRO | A | 232 | 19203  | 17553  | 13705  | -9424      | -3218 | 806  | O |
| ATOM   | 1703 | CB  | PRO | A | 232 | -1.620 | 19.129 | 30.295 | 1.00156.72 |       |      | C |
| ANISOU | 1703 | CB  | PRO | A | 232 | 21596  | 21239  | 16711  | -9881      | -3662 | 1562 | C |
| ATOM   | 1704 | CG  | PRO | A | 232 | -0.396 | 18.277 | 30.269 | 1.00162.71 |       |      | C |
| ANISOU | 1704 | CG  | PRO | A | 232 | 21822  | 22347  | 17652  | -10069     | -3900 | 2031 | C |
| ATOM   | 1705 | CD  | PRO | A | 232 | -0.159 | 17.966 | 28.833 | 1.00163.60 |       |      | C |
| ANISOU | 1705 | CD  | PRO | A | 232 | 21661  | 22339  | 18159  | -9846      | -3690 | 2017 | C |
| ATOM   | 1706 | N   | ALA | A | 233 | -3.385 | 19.706 | 27.115 | 1.00138.19 |       |      | N |
| ANISOU | 1706 | N   | ALA | A | 233 | 19573  | 18030  | 14903  | -9010      | -2993 | 766  | N |
| ATOM   | 1707 | CA  | ALA | A | 233 | -3.887 | 20.806 | 26.304 | 1.00133.02 |       |      | C |
| ANISOU | 1707 | CA  | ALA | A | 233 | 19245  | 17080  | 14215  | -8857      | -2871 | 467  | C |
| ATOM   | 1708 | C   | ALA | A | 233 | -5.385 | 20.677 | 26.056 | 1.00127.31 |       |      | C |
| ANISOU | 1708 | C   | ALA | A | 233 | 18727  | 16028  | 13618  | -8441      | -2704 | 60   | C |
| ATOM   | 1709 | O   | ALA | A | 233 | -5.940 | 19.577 | 26.075 | 1.00130.46 |       |      | O |
| ANISOU | 1709 | O   | ALA | A | 233 | 18963  | 16389  | 14216  | -8250      | -2628 | -3   | O |
| ATOM   | 1710 | CB  | ALA | A | 233 | -3.137 | 20.868 | 24.983 | 1.00113.52 |       |      | C |
| ANISOU | 1710 | CB  | ALA | A | 233 | 16669  | 14574  | 11890  | -8904      | -2818 | 582  | C |
| ATOM   | 1711 | N   | ARG | A | 234 | -6.034 | 21.811 | 25.821 | 1.00126.02 |       |      | N |
| ANISOU | 1711 | N   | ARG | A | 234 | 18891  | 15618  | 13371  | -8311      | -2657 | -218 | N |
| ATOM   | 1712 | CA  | ARG | A | 234 | -7.459 | 21.828 | 25.532 | 1.00125.86 |       |      | C |
| ANISOU | 1712 | CA  | ARG | A | 234 | 18997  | 15292  | 13531  | -7895      | -2541 | -629 | C |
| ATOM   | 1713 | C   | ARG | A | 234 | -7.719 | 22.261 | 24.094 | 1.00131.58 |       |      | C |

|        |      |     |     |   |     |         |        |        |            |       |       |   |
|--------|------|-----|-----|---|-----|---------|--------|--------|------------|-------|-------|---|
| ANISOU | 1713 | C   | ARG | A | 234 | 19891   | 15739  | 14363  | -7663      | -2518 | -798  | C |
| ATOM   | 1714 | O   | ARG | A | 234 | -8.096  | 23.405 | 23.851 | 1.00124.31 |       |       | O |
| ANISOU | 1714 | O   | ARG | A | 234 | 19271   | 14613  | 13346  | -7592      | -2537 | -973  | O |
| ATOM   | 1715 | CB  | ARG | A | 234 | -8.185  | 22.783 | 26.478 | 1.00121.40 |       |       | C |
| ANISOU | 1715 | CB  | ARG | A | 234 | 18667   | 14638  | 12823  | -7887      | -2530 | -851  | C |
| ATOM   | 1716 | CG  | ARG | A | 234 | -7.950  | 22.533 | 27.955 | 1.00121.91 |       |       | C |
| ANISOU | 1716 | CG  | ARG | A | 234 | 18698   | 14949  | 12673  | -8177      | -2564 | -698  | C |
| ATOM   | 1717 | CD  | ARG | A | 234 | -8.778  | 23.504 | 28.779 | 1.00133.57 |       |       | C |
| ANISOU | 1717 | CD  | ARG | A | 234 | 20448   | 16283  | 14019  | -8160      | -2513 | -972  | C |
| ATOM   | 1718 | NE  | ARG | A | 234 | -10.197 | 23.416 | 28.440 | 1.00145.60 |       |       | N |
| ANISOU | 1718 | NE  | ARG | A | 234 | 21951   | 17526  | 15845  | -7733      | -2383 | -1395 | N |
| ATOM   | 1719 | CZ  | ARG | A | 234 | -11.099 | 24.347 | 28.733 | 1.00147.99 |       |       | C |
| ANISOU | 1719 | CZ  | ARG | A | 234 | 22445   | 17616  | 16166  | -7594      | -2338 | -1723 | C |
| ATOM   | 1720 | NH1 | ARG | A | 234 | -10.733 | 25.451 | 29.366 | 1.00144.09 |       |       | N |
| ANISOU | 1720 | NH1 | ARG | A | 234 | 22236   | 17135  | 15378  | -7857      | -2384 | -1674 | N |
| ATOM   | 1721 | NH2 | ARG | A | 234 | -12.368 | 24.180 | 28.385 | 1.00108.14 |       |       | N |
| ANISOU | 1721 | NH2 | ARG | A | 234 | 17290   | 12340  | 11458  | -7197      | -2265 | -2120 | N |
| ATOM   | 1722 | N   | PHE | A | 235 | -7.509  | 21.355 | 23.145 | 1.00139.38 |       |       | N |
| ANISOU | 1722 | N   | PHE | A | 235 | 20729   | 16703  | 15526  | -7568      | -2485 | -739  | N |
| ATOM   | 1723 | CA  | PHE | A | 235 | -7.836  | 21.633 | 21.753 | 1.00135.74 |       |       | C |
| ANISOU | 1723 | CA  | PHE | A | 235 | 20493   | 15957  | 15124  | -7346      | -2479 | -919  | C |
| ATOM   | 1724 | C   | PHE | A | 235 | -9.338  | 21.836 | 21.654 | 1.00131.75 |       |       | C |
| ANISOU | 1724 | C   | PHE | A | 235 | 20066   | 15185  | 14807  | -6890      | -2487 | -1375 | C |
| ATOM   | 1725 | O   | PHE | A | 235 | -10.109 | 20.892 | 21.823 | 1.00 99.82 |       |       | O |
| ANISOU | 1725 | O   | PHE | A | 235 | 15771   | 11123  | 11033  | -6645      | -2442 | -1574 | O |
| ATOM   | 1726 | CB  | PHE | A | 235 | -7.411  | 20.474 | 20.854 | 1.00102.19 |       |       | C |
| ANISOU | 1726 | CB  | PHE | A | 235 | 16073   | 11722  | 11034  | -7338      | -2429 | -804  | C |
| ATOM   | 1727 | CG  | PHE | A | 235 | -5.949  | 20.142 | 20.935 | 1.00104.22 |       |       | C |
| ANISOU | 1727 | CG  | PHE | A | 235 | 16118   | 12264  | 11216  | -7764      | -2416 | -363  | C |
| ATOM   | 1728 | CD1 | PHE | A | 235 | -5.055  | 20.669 | 20.021 | 1.00125.28 |       |       | C |
| ANISOU | 1728 | CD1 | PHE | A | 235 | 18957   | 14896  | 13749  | -8015      | -2387 | -189  | C |
| ATOM   | 1729 | CD2 | PHE | A | 235 | -5.470  | 19.293 | 21.919 | 1.00131.14 |       |       | C |
| ANISOU | 1729 | CD2 | PHE | A | 235 | 19140   | 15974  | 14712  | -7922      | -2432 | -120  | C |
| ATOM   | 1730 | CE1 | PHE | A | 235 | -3.710  | 20.360 | 20.091 | 1.00132.61 |       |       | C |
| ANISOU | 1730 | CE1 | PHE | A | 235 | 19567   | 16110  | 14708  | -8394      | -2355 | 202   | C |
| ATOM   | 1731 | CE2 | PHE | A | 235 | -4.126  | 18.983 | 21.994 | 1.00107.21 |       |       | C |
| ANISOU | 1731 | CE2 | PHE | A | 235 | 15814   | 13232  | 11691  | -8270      | -2457 | 290   | C |
| ATOM   | 1732 | CZ  | PHE | A | 235 | -3.246  | 19.517 | 21.080 | 1.00109.27 |       |       | C |
| ANISOU | 1732 | CZ  | PHE | A | 235 | 16141   | 13481  | 11894  | -8495      | -2408 | 442   | C |
| ATOM   | 1733 | N   | LYS | A | 236 | -9.754  | 23.072 | 21.397 | 1.00120.37 |       |       | N |
| ANISOU | 1733 | N   | LYS | A | 236 | 18949   | 13536  | 13252  | -6788      | -2549 | -1548 | N |
| ATOM   | 1734 | CA  | LYS | A | 236 | -11.173 | 23.411 | 21.429 | 1.00120.66 |       |       | C |
| ANISOU | 1734 | CA  | LYS | A | 236 | 18990   | 13354  | 13503  | -6363      | -2591 | -1998 | C |
| ATOM   | 1735 | C   | LYS | A | 236 | -11.787 | 23.529 | 20.034 | 1.00119.06 |       |       | C |
| ANISOU | 1735 | C   | LYS | A | 236 | 18969   | 12872  | 13397  | -5998      | -2694 | -2260 | C |
| ATOM   | 1736 | O   | LYS | A | 236 | -13.007 | 23.649 | 19.902 | 1.00123.77 |       |       | O |
| ANISOU | 1736 | O   | LYS | A | 236 | 19473   | 13315  | 14238  | -5598      | -2765 | -2680 | O |
| ATOM   | 1737 | CB  | LYS | A | 236 | -11.398 | 24.703 | 22.220 | 1.00128.41 |       |       | C |
| ANISOU | 1737 | CB  | LYS | A | 236 | 20187   | 14276  | 14328  | -6453      | -2613 | -2073 | C |
| ATOM   | 1738 | CG  | LYS | A | 236 | -10.968 | 24.629 | 23.684 | 1.00104.87 |       |       | C |
| ANISOU | 1738 | CG  | LYS | A | 236 | 17078   | 11554  | 11215  | -6782      | -2539 | -1883 | C |
| ATOM   | 1739 | CD  | LYS | A | 236 | -12.057 | 24.053 | 24.565 | 1.00103.96 |       |       | C |
| ANISOU | 1739 | CD  | LYS | A | 236 | 16704   | 11451  | 11345  | -6575      | -2470 | -2170 | C |
| ATOM   | 1740 | CE  | LYS | A | 236 | -13.261 | 24.977 | 24.612 | 1.00161.32 |       |       | C |
| ANISOU | 1740 | CE  | LYS | A | 236 | 24077   | 18459  | 18758  | -6273      | -2511 | -2607 | C |
| ATOM   | 1741 | NZ  | LYS | A | 236 | -14.321 | 24.464 | 25.518 | 1.00155.41 |       |       | N |
| ANISOU | 1741 | NZ  | LYS | A | 236 | 23081   | 17711  | 18255  | -6129      | -2429 | -2905 | N |
| ATOM   | 1742 | N   | ALA | A | 237 | -10.944 | 23.486 | 19.003 | 1.00118.27 |       |       | N |
| ANISOU | 1742 | N   | ALA | A | 237 | 19128   | 12713  | 13095  | -6150      | -2709 | -2028 | N |
| ATOM   | 1743 | CA  | ALA | A | 237 | -11.414 | 23.577 | 17.620 | 1.00119.00 |       |       | C |
| ANISOU | 1743 | CA  | ALA | A | 237 | 19510   | 12528  | 13178  | -5832      | -2823 | -2235 | C |
| ATOM   | 1744 | C   | ALA | A | 237 | -10.344 | 23.214 | 16.590 | 1.00103.53 |       |       | C |
| ANISOU | 1744 | C   | ALA | A | 237 | 17830   | 10524  | 10982  | -6083      | -2781 | -1941 | C |
| ATOM   | 1745 | O   | ALA | A | 237 | -9.178  | 23.588 | 16.728 | 1.00104.98 |       |       | O |
| ANISOU | 1745 | O   | ALA | A | 237 | 18164   | 10808  | 10915  | -6552      | -2692 | -1577 | O |
| ATOM   | 1746 | CB  | ALA | A | 237 | -11.961 | 24.974 | 17.335 | 1.00119.57 |       |       | C |
| ANISOU | 1746 | CB  | ALA | A | 237 | 19993   | 12337  | 13102  | -5668      | -2950 | -2409 | C |
| ATOM   | 1747 | N   | ILE | A | 238 | -10.759 | 22.485 | 15.557 | 1.00108.19 |       |       | N |
| ANISOU | 1747 | N   | ILE | A | 238 | 18480   | 10967  | 11661  | -5783      | -2839 | -2131 | N |
| ATOM   | 1748 | CA  | ILE | A | 238 | -9.912  | 22.223 | 14.397 | 1.00104.32 |       |       | C |

|        |      |     |     |   |     |         |        |        |            |       |       |   |
|--------|------|-----|-----|---|-----|---------|--------|--------|------------|-------|-------|---|
| ANISOU | 1748 | CA  | ILE | A | 238 | 18391   | 10337  | 10909  | -5964      | -2797 | -1934 | C |
| ATOM   | 1749 | C   | ILE | A | 238 | -10.578 | 22.766 | 13.137 | 1.00107.68 |       |       | C |
| ANISOU | 1749 | C   | ILE | A | 238 | 19367   | 10400  | 11149  | -5566      | -2974 | -2176 | C |
| ATOM   | 1750 | O   | ILE | A | 238 | -11.730 | 22.441 | 12.847 | 1.00105.56 |       |       | O |
| ANISOU | 1750 | O   | ILE | A | 238 | 18929   | 10067  | 11111  | -5062      | -3127 | -2561 | O |
| ATOM   | 1751 | CB  | ILE | A | 238 | -9.655  | 20.725 | 14.192 | 1.00108.35 |       |       | C |
| ANISOU | 1751 | CB  | ILE | A | 238 | 18583   | 10961  | 11623  | -5987      | -2696 | -1916 | C |
| ATOM   | 1752 | CG1 | ILE | A | 238 | -8.980  | 20.121 | 15.421 | 1.00101.56 |       |       | C |
| ANISOU | 1752 | CG1 | ILE | A | 238 | 17193   | 10458  | 10935  | -6352      | -2548 | -1637 | C |
| ATOM   | 1753 | CG2 | ILE | A | 238 | -8.776  | 20.514 | 12.975 | 1.00104.75 |       |       | C |
| ANISOU | 1753 | CG2 | ILE | A | 238 | 18606   | 10316  | 10876  | -6202      | -2607 | -1746 | C |
| ATOM   | 1754 | CD1 | ILE | A | 238 | -7.521  | 20.473 | 15.543 | 1.00103.52 |       |       | C |
| ANISOU | 1754 | CD1 | ILE | A | 238 | 17512   | 10869  | 10952  | -6933      | -2418 | -1184 | C |
| ATOM   | 1755 | N   | HIS | A | 239 | -9.852  | 23.592 | 12.390 | 1.00113.93 |       |       | N |
| ANISOU | 1755 | N   | HIS | A | 239 | 20817   | 10958  | 11513  | -5807      | -2948 | -1952 | N |
| ATOM   | 1756 | CA  | HIS | A | 239 | -10.414 | 24.229 | 11.204 | 1.00115.45 |       |       | C |
| ANISOU | 1756 | CA  | HIS | A | 239 | 21665   | 10764  | 11436  | -5426      | -3133 | -2118 | C |
| ATOM   | 1757 | C   | HIS | A | 239 | -9.722  | 23.809 | 9.915  | 1.00122.06 |       |       | C |
| ANISOU | 1757 | C   | HIS | A | 239 | 23093   | 11366  | 11919  | -5513      | -3039 | -1996 | C |
| ATOM   | 1758 | O   | HIS | A | 239 | -8.496  | 23.863 | 9.807  | 1.00131.24 |       |       | O |
| ANISOU | 1758 | O   | HIS | A | 239 | 24507   | 12518  | 12839  | -6079      | -2780 | -1674 | O |
| ATOM   | 1759 | CB  | HIS | A | 239 | -10.362 | 25.752 | 11.329 | 1.00118.86 |       |       | C |
| ANISOU | 1759 | CB  | HIS | A | 239 | 22583   | 10986  | 11594  | -5546      | -3189 | -2006 | C |
| ATOM   | 1760 | CG  | HIS | A | 239 | -11.154 | 26.292 | 12.479 | 1.00120.49 |       |       | C |
| ANISOU | 1760 | CG  | HIS | A | 239 | 22343   | 11340  | 12097  | -5404      | -3274 | -2189 | C |
| ATOM   | 1761 | ND1 | HIS | A | 239 | -12.527 | 26.264 | 12.516 | 1.00124.86 |       |       | N |
| ANISOU | 1761 | ND1 | HIS | A | 239 | 22625   | 11872  | 12945  | -4849      | -3479 | -2606 | N |
| ATOM   | 1762 | CD2 | HIS | A | 239 | -10.753 | 26.884 | 13.631 | 1.00121.01 |       |       | C |
| ANISOU | 1762 | CD2 | HIS | A | 239 | 22205   | 11578  | 12195  | -5767      | -3161 | -2036 | C |
| ATOM   | 1763 | CE1 | HIS | A | 239 | -12.946 | 26.814 | 13.646 | 1.00126.06 |       |       | C |
| ANISOU | 1763 | CE1 | HIS | A | 239 | 22451   | 12148  | 13298  | -4888      | -3456 | -2713 | C |
| ATOM   | 1764 | NE2 | HIS | A | 239 | -11.891 | 27.196 | 14.336 | 1.00125.37 |       |       | N |
| ANISOU | 1764 | NE2 | HIS | A | 239 | 22427   | 12169  | 13039  | -5416      | -3278 | -2365 | N |
| ATOM   | 1765 | N   | PHE | A | 240 | -10.520 | 23.392 | 8.939  | 1.00122.07 |       |       | N |
| ANISOU | 1765 | N   | PHE | A | 240 | 23299   | 11185  | 11898  | -4963      | -3228 | -2278 | N |
| ATOM   | 1766 | CA  | PHE | A | 240 | -10.002 | 23.050 | 7.620  | 1.00123.91 |       |       | C |
| ANISOU | 1766 | CA  | PHE | A | 240 | 24221   | 11134  | 11723  | -4934      | -3143 | -2216 | C |
| ATOM   | 1767 | C   | PHE | A | 240 | -10.535 | 24.036 | 6.589  | 1.00128.40 |       |       | C |
| ANISOU | 1767 | C   | PHE | A | 240 | 25593   | 11308  | 11885  | -4523      | -3377 | -2279 | C |
| ATOM   | 1768 | O   | PHE | A | 240 | -11.741 | 24.271 | 6.501  | 1.00131.66 |       |       | O |
| ANISOU | 1768 | O   | PHE | A | 240 | 25832   | 11706  | 12486  | -3977      | -3713 | -2564 | O |
| ATOM   | 1769 | CB  | PHE | A | 240 | -10.376 | 21.622 | 7.228  | 1.00123.06 |       |       | C |
| ANISOU | 1769 | CB  | PHE | A | 240 | 23766   | 11132  | 11862  | -4622      | -3161 | -2470 | C |
| ATOM   | 1770 | CG  | PHE | A | 240 | -9.666  | 20.567 | 8.019  | 1.00124.43 |       |       | C |
| ANISOU | 1770 | CG  | PHE | A | 240 | 23350   | 11588  | 12341  | -5058      | -2896 | -2346 | C |
| ATOM   | 1771 | CD1 | PHE | A | 240 | -8.454  | 20.056 | 7.585  | 1.00113.97 |       |       | C |
| ANISOU | 1771 | CD1 | PHE | A | 240 | 22343   | 10171  | 10790  | -5522      | -2560 | -2115 | C |
| ATOM   | 1772 | CD2 | PHE | A | 240 | -10.214 | 20.073 | 9.190  | 1.00124.19 |       |       | C |
| ANISOU | 1772 | CD2 | PHE | A | 240 | 22470   | 11888  | 12829  | -5017      | -2948 | -2463 | C |
| ATOM   | 1773 | CE1 | PHE | A | 240 | -7.800  | 19.081 | 8.311  | 1.00129.66 |       |       | C |
| ANISOU | 1773 | CE1 | PHE | A | 240 | 23746   | 12407  | 13112  | -5938      | -2330 | -1969 | C |
| ATOM   | 1774 | CE2 | PHE | A | 240 | -9.562  | 19.095 | 9.915  | 1.00125.07 |       |       | C |
| ANISOU | 1774 | CE2 | PHE | A | 240 | 22080   | 12237  | 13202  | -5397      | -2728 | -2302 | C |
| ATOM   | 1775 | CZ  | PHE | A | 240 | -8.363  | 18.583 | 9.472  | 1.00127.87 |       |       | C |
| ANISOU | 1775 | CZ  | PHE | A | 240 | 22691   | 12518  | 13375  | -5850      | -2445 | -2045 | C |
| ATOM   | 1776 | N   | ILE | A | 241 | -9.629  | 24.633 | 5.825  | 1.00131.81 |       |       | N |
| ANISOU | 1776 | N   | ILE | A | 241 | 26917   | 11406  | 11757  | -4824      | -3173 | -2008 | N |
| ATOM   | 1777 | CA  | ILE | A | 241 | -10.016 | 25.612 | 4.817  | 1.00148.88 |       |       | C |
| ANISOU | 1777 | CA  | ILE | A | 241 | 29991   | 13129  | 13447  | -4464      | -3369 | -1995 | C |
| ATOM   | 1778 | C   | ILE | A | 241 | -9.504  | 25.243 | 3.425  | 1.00156.84 |       |       | C |
| ANISOU | 1778 | C   | ILE | A | 241 | 31868   | 13813  | 13911  | -4366      | -3189 | -1929 | C |
| ATOM   | 1779 | O   | ILE | A | 241 | -8.423  | 24.667 | 3.277  | 1.00154.66 |       |       | O |
| ANISOU | 1779 | O   | ILE | A | 241 | 31745   | 13544  | 13473  | -4848      | -2748 | -1785 | O |
| ATOM   | 1780 | CB  | ILE | A | 241 | -9.534  | 27.030 | 5.191  | 1.00152.97 |       |       | C |
| ANISOU | 1780 | CB  | ILE | A | 241 | 30997   | 13429  | 13696  | -4881      | -3271 | -1724 | C |
| ATOM   | 1781 | CG1 | ILE | A | 241 | -8.039  | 27.015 | 5.512  | 1.00131.88 |       |       | C |
| ANISOU | 1781 | CG1 | ILE | A | 241 | 28434   | 10812  | 10864  | -5751      | -2763 | -1405 | C |
| ATOM   | 1782 | CG2 | ILE | A | 241 | -10.322 | 27.560 | 6.379  | 1.00129.03 |       |       | C |
| ANISOU | 1782 | CG2 | ILE | A | 241 | 27272   | 10631  | 11122  | -4772      | -3509 | -1860 | C |
| ATOM   | 1783 | CD1 | ILE | A | 241 | -7.473  | 28.375 | 5.836  | 1.00134.85 |       |       | C |

|        |      |     |     |   |     |         |        |        |            |       |       |   |
|--------|------|-----|-----|---|-----|---------|--------|--------|------------|-------|-------|---|
| ANISOU | 1783 | CD1 | ILE | A | 241 | 29280   | 10981  | 10976  | -6243      | -2615 | -1146 | C |
| ATOM   | 1784 | N   | HIS | A | 242 | -10.314 | 25.556 | 2.416  | 1.00163.04 |       |       | N |
| ANISOU | 1784 | NA  | HIS | A | 242 | 33207   | 14314  | 14425  | -3732      | -3522 | -2052 | N |
| ATOM   | 1785 | CA  | HIS | A | 242 | -9.940  | 25.414 | 1.011  | 1.00167.79 |       |       | C |
| ANISOU | 1785 | CA  | HIS | A | 242 | 34796   | 14550  | 14406  | -3542      | -3377 | -1972 | C |
| ATOM   | 1786 | C   | HIS | A | 242 | -9.632  | 23.975 | 0.606  | 1.00161.01 |       |       | C |
| ANISOU | 1786 | C   | HIS | A | 242 | 33682   | 13875  | 13618  | -3492      | -3150 | -2122 | C |
| ATOM   | 1787 | O   | HIS | A | 242 | -8.994  | 23.739 | -0.420 | 1.00159.98 |       |       | O |
| ANISOU | 1787 | O   | HIS | A | 242 | 34355   | 13480  | 12948  | -3500      | -2821 | -2026 | O |
| ATOM   | 1788 | CB  | HIS | A | 242 | -8.756  | 26.326 | 0.678  | 1.00173.99 |       |       | C |
| ANISOU | 1788 | CB  | HIS | A | 242 | 36598   | 14941  | 14569  | -4119      | -2901 | -1604 | C |
| ATOM   | 1789 | CG  | HIS | A | 242 | -8.922  | 27.732 | 1.166  | 1.00182.38 |       |       | C |
| ANISOU | 1789 | CG  | HIS | A | 242 | 37934   | 15799  | 15563  | -4270      | -3057 | -1443 | C |
| ATOM   | 1790 | ND1 | HIS | A | 242 | -10.156 | 28.322 | 1.333  | 1.00185.91 |       |       | N |
| ANISOU | 1790 | ND1 | HIS | A | 242 | 38188   | 16216  | 16234  | -3698      | -3628 | -1605 | N |
| ATOM   | 1791 | CD2 | HIS | A | 242 | -8.008  | 28.662 | 1.532  | 1.00193.04 |       |       | C |
| ANISOU | 1791 | CD2 | HIS | A | 242 | 39731   | 16953  | 16662  | -4955      | -2690 | -1160 | C |
| ATOM   | 1792 | CE1 | HIS | A | 242 | -9.996  | 29.556 | 1.778  | 1.00193.76 |       |       | C |
| ANISOU | 1792 | CE1 | HIS | A | 242 | 39548   | 16984  | 17088  | -3978      | -3610 | -1419 | C |
| ATOM   | 1793 | NE2 | HIS | A | 242 | -8.701  | 29.786 | 1.906  | 1.00197.12 |       |       | N |
| ANISOU | 1793 | NE2 | HIS | A | 242 | 40358   | 17315  | 17224  | -4749      | -3053 | -1144 | N |
| ATOM   | 1794 | N   | GLN | A | 243 | -10.093 | 23.019 | 1.406  | 1.00152.04 |       |       | N |
| ANISOU | 1794 | N   | GLN | A | 243 | 31477   | 13163  | 13128  | -3434      | -3278 | -2363 | N |
| ATOM   | 1795 | CA  | GLN | A | 243 | -9.879  | 21.609 | 1.105  | 1.00147.66 |       |       | C |
| ANISOU | 1795 | CA  | GLN | A | 243 | 30644   | 12759  | 12702  | -3371      | -3083 | -2534 | C |
| ATOM   | 1796 | C   | GLN | A | 243 | -10.655 | 21.222 | -0.152 | 1.00151.38 |       |       | C |
| ANISOU | 1796 | C   | GLN | A | 243 | 31496   | 13076  | 12945  | -2683      | -3372 | -2762 | C |
| ATOM   | 1797 | O   | GLN | A | 243 | -11.713 | 21.788 | -0.431 | 1.00159.15 |       |       | O |
| ANISOU | 1797 | O   | GLN | A | 243 | 32495   | 14002  | 13971  | -2207      | -3868 | -2896 | O |
| ATOM   | 1798 | CB  | GLN | A | 243 | -10.282 | 20.729 | 2.294  | 1.00136.59 |       |       | C |
| ANISOU | 1798 | CB  | GLN | A | 243 | 28052   | 11795  | 12050  | -3463      | -3169 | -2731 | C |
| ATOM   | 1799 | CG  | GLN | A | 243 | -11.772 | 20.440 | 2.406  | 1.00133.91 |       |       | C |
| ANISOU | 1799 | CG  | GLN | A | 243 | 27044   | 11655  | 12181  | -2876      | -3659 | -3112 | C |
| ATOM   | 1800 | CD  | GLN | A | 243 | -12.601 | 21.678 | 2.674  | 1.00144.61 |       |       | C |
| ANISOU | 1800 | CD  | GLN | A | 243 | 28405   | 12959  | 13580  | -2658      | -4020 | -3130 | C |
| ATOM   | 1801 | OE1 | GLN | A | 243 | -12.092 | 22.693 | 3.153  | 1.00148.82 |       |       | O |
| ANISOU | 1801 | OE1 | GLN | A | 243 | 29209   | 13390  | 13944  | -3001      | -3915 | -2861 | O |
| ATOM   | 1802 | NE2 | GLN | A | 243 | -13.890 | 21.601 | 2.365  | 1.00145.05 |       |       | N |
| ANISOU | 1802 | NE2 | GLN | A | 243 | 28174   | 13071  | 13867  | -2118      | -4435 | -3465 | N |
| ATOM   | 1803 | N   | PRO | A | 244 | -10.118 | 20.271 | -0.930 | 1.00150.39 |       |       | N |
| ANISOU | 1803 | N   | PRO | A | 244 | 31706   | 12871  | 12563  | -2643      | -3050 | -2811 | N |
| ATOM   | 1804 | CA  | PRO | A | 244 | -10.751 | 19.883 | -2.195 | 1.00152.29 |       |       | C |
| ANISOU | 1804 | CA  | PRO | A | 244 | 32376   | 12963  | 12525  | -2033      | -3297 | -3007 | C |
| ATOM   | 1805 | C   | PRO | A | 244 | -11.969 | 18.990 | -1.991 | 1.00149.33 |       |       | C |
| ANISOU | 1805 | C   | PRO | A | 244 | 31072   | 12898  | 12769  | -1625      | -3751 | -3431 | C |
| ATOM   | 1806 | O   | PRO | A | 244 | -12.365 | 18.726 | -0.856 | 1.00136.35 |       |       | O |
| ANISOU | 1806 | O   | PRO | A | 244 | 28483   | 11568  | 11757  | -1786      | -3844 | -3563 | O |
| ATOM   | 1807 | CB  | PRO | A | 244 | -9.647  | 19.098 | -2.914 | 1.00150.42 |       |       | C |
| ANISOU | 1807 | CB  | PRO | A | 244 | 32734   | 12568  | 11851  | -2211      | -2664 | -2927 | C |
| ATOM   | 1808 | CG  | PRO | A | 244 | -8.378  | 19.395 | -2.160 | 1.00152.46 |       |       | C |
| ANISOU | 1808 | CG  | PRO | A | 244 | 33085   | 12810  | 12033  | -2952      | -2064 | -2644 | C |
| ATOM   | 1809 | CD  | PRO | A | 244 | -8.808  | 19.626 | -0.754 | 1.00144.76 |       |       | C |
| ANISOU | 1809 | CD  | PRO | A | 244 | 31126   | 12149  | 11726  | -3196      | -2383 | -2669 | C |
| ATOM   | 1810 | N   | TRP | A | 245 | -12.551 | 18.527 | -3.092 | 1.00157.04 |       |       | N |
| ANISOU | 1810 | NA  | TRP | A | 245 | 32347   | 13779  | 13543  | -1140      | -3995 | -3644 | N |
| ATOM   | 1811 | CA  | TRP | A | 245 | -13.714 | 17.650 | -3.040 | 1.00163.09 |       |       | C |
| ANISOU | 1811 | CA  | TRP | A | 245 | 32306   | 14810  | 14850  | -810       | -4385 | -4079 | C |
| ATOM   | 1812 | C   | TRP | A | 245 | -13.339 | 16.263 | -2.530 | 1.00149.61 |       |       | C |
| ANISOU | 1812 | C   | TRP | A | 245 | 29962   | 13318  | 13565  | -1049      | -4025 | -4253 | C |
| ATOM   | 1813 | O   | TRP | A | 245 | -14.195 | 15.521 | -2.050 | 1.00143.89 |       |       | O |
| ANISOU | 1813 | O   | TRP | A | 245 | 28381   | 12855  | 13437  | -966       | -4220 | -4590 | O |
| ATOM   | 1814 | CB  | TRP | A | 245 | -14.362 | 17.539 | -4.423 | 1.00181.32 |       |       | C |
| ANISOU | 1814 | CB  | TRP | A | 245 | 35194   | 16930  | 16770  | -282       | -4753 | -4249 | C |
| ATOM   | 1815 | CG  | TRP | A | 245 | -13.428 | 17.028 | -5.478 | 1.00186.54 |       |       | C |
| ANISOU | 1815 | CG  | TRP | A | 245 | 36717   | 17341  | 16818  | -268       | -4336 | -4127 | C |
| ATOM   | 1816 | CD1 | TRP | A | 245 | -12.657 | 17.775 | -6.321 | 1.00188.21 |       |       | C |
| ANISOU | 1816 | CD1 | TRP | A | 245 | 38076   | 17175  | 16258  | -262       | -4088 | -3786 | C |
| ATOM   | 1817 | CD2 | TRP | A | 245 | -13.160 | 15.656 | -5.800 | 1.00181.49 |       |       | C |
| ANISOU | 1817 | CD2 | TRP | A | 245 | 35905   | 16781  | 16274  | -267       | -4043 | -4351 | C |
| ATOM   | 1818 | NE1 | TRP | A | 245 | -11.928 | 16.955 | -7.148 | 1.00184.48 |       |       | N |

|        |      |     |     |   |     |         |        |        |            |       |       |   |
|--------|------|-----|-----|---|-----|---------|--------|--------|------------|-------|-------|---|
| ANISOU | 1818 | NE1 | TRP | A | 245 | 38139   | 16568  | 15387  | -252       | -3620 | -3787 | N |
| ATOM   | 1819 | CE2 | TRP | A | 245 | -12.218 | 15.651 | -6.848 | 1.00183.53 |       |       | C |
| ANISOU | 1819 | CE2 | TRP | A | 245 | 37226   | 16718  | 15790  | -239       | -3603 | -4136 | C |
| ATOM   | 1820 | CE3 | TRP | A | 245 | -13.626 | 14.435 | -5.303 | 1.00179.49 |       |       | C |
| ANISOU | 1820 | CE3 | TRP | A | 245 | 34740   | 16803  | 16656  | -297       | -4063 | -4715 | C |
| ATOM   | 1821 | CZ2 | TRP | A | 245 | -11.734 | 14.471 | -7.408 | 1.00190.13 |       |       | C |
| ANISOU | 1821 | CZ2 | TRP | A | 245 | 38219   | 17514  | 16507  | -207       | -3189 | -4285 | C |
| ATOM   | 1822 | CZ3 | TRP | A | 245 | -13.142 | 13.264 | -5.862 | 1.00184.31 |       |       | C |
| ANISOU | 1822 | CZ3 | TRP | A | 245 | 35529   | 17343  | 17157  | -274       | -3696 | -4857 | C |
| ATOM   | 1823 | CH2 | TRP | A | 245 | -12.207 | 13.291 | -6.903 | 1.00189.97 |       |       | C |
| ANISOU | 1823 | CH2 | TRP | A | 245 | 37295   | 17750  | 17134  | -213       | -3267 | -4649 | C |
| ATOM   | 1824 | N   | TYR | A | 246 | -12.059 | 15.918 | -2.641 | 1.00150.59 |       |       | N |
| ANISOU | 1824 | N   | TYR | A | 246 | 30556   | 13293  | 13369  | -1364      | -3451 | -4025 | N |
| ATOM   | 1825 | CA  | TYR | A | 246 | -11.588 | 14.590 | -2.259 | 1.00154.24 |       |       | C |
| ANISOU | 1825 | CA  | TYR | A | 246 | 30585   | 13854  | 14165  | -1564      | -3067 | -4162 | C |
| ATOM   | 1826 | C   | TYR | A | 246 | -10.942 | 14.568 | -0.877 | 1.00153.23 |       |       | C |
| ANISOU | 1826 | C   | TYR | A | 246 | 29915   | 13874  | 14434  | -2114      | -2779 | -3976 | C |
| ATOM   | 1827 | O   | TYR | A | 246 | -10.238 | 13.620 | -0.523 | 1.00131.06 |       |       | O |
| ANISOU | 1827 | O   | TYR | A | 246 | 26947   | 11047  | 11803  | -2382      | -2350 | -3974 | O |
| ATOM   | 1828 | CB  | TYR | A | 246 | -10.612 | 14.038 | -3.303 | 1.00152.24 |       |       | C |
| ANISOU | 1828 | CB  | TYR | A | 246 | 31193   | 13317  | 13336  | -1535      | -2535 | -4084 | C |
| ATOM   | 1829 | CG  | TYR | A | 246 | -9.392  | 14.902 | -3.530 | 1.00154.08 |       |       | C |
| ANISOU | 1829 | CG  | TYR | A | 246 | 32307   | 13299  | 12938  | -1873      | -2012 | -3676 | C |
| ATOM   | 1830 | CD1 | TYR | A | 246 | -8.272  | 14.788 | -2.718 | 1.00150.59 |       |       | C |
| ANISOU | 1830 | CD1 | TYR | A | 246 | 31714   | 12883  | 12619  | -2445      | -1410 | -3441 | C |
| ATOM   | 1831 | CD2 | TYR | A | 246 | -9.360  | 15.826 | -4.563 | 1.00166.00 |       |       | C |
| ANISOU | 1831 | CD2 | TYR | A | 246 | 34752   | 14554  | 13766  | -1655      | -2071 | -3501 | C |
| ATOM   | 1832 | CE1 | TYR | A | 246 | -7.158  | 15.575 | -2.923 | 1.00143.81 |       |       | C |
| ANISOU | 1832 | CE1 | TYR | A | 246 | 31186   | 12018  | 11438  | -2748      | -806  | -2898 | C |
| ATOM   | 1833 | CE2 | TYR | A | 246 | -8.249  | 16.614 | -4.779 | 1.00171.94 |       |       | C |
| ANISOU | 1833 | CE2 | TYR | A | 246 | 36331   | 15063  | 13935  | -2014      | -1503 | -3141 | C |
| ATOM   | 1834 | CZ  | TYR | A | 246 | -7.154  | 16.487 | -3.955 | 1.00167.75 |       |       | C |
| ANISOU | 1834 | CZ  | TYR | A | 246 | 35391   | 14686  | 13661  | -2586      | -850  | -2860 | C |
| ATOM   | 1835 | OH  | TYR | A | 246 | -6.049  | 17.274 | -4.170 | 1.00172.72 |       |       | O |
| ANISOU | 1835 | OH  | TYR | A | 246 | 36363   | 15275  | 13987  | -2934      | -189  | -2327 | O |
| ATOM   | 1836 | N   | PHE | A | 247 | -11.177 | 15.616 | -0.097 | 1.00144.90 |       |       | N |
| ANISOU | 1836 | N   | PHE | A | 247 | 28605   | 12939  | 13513  | -2287      | -3005 | -3815 | N |
| ATOM   | 1837 | CA  | PHE | A | 247 | -10.661 | 15.667 | 1.262  | 1.00143.19 |       |       | C |
| ANISOU | 1837 | CA  | PHE | A | 247 | 27828   | 12901  | 13678  | -2825      | -2808 | -3630 | C |
| ATOM   | 1838 | C   | PHE | A | 247 | -11.376 | 14.655 | 2.151  | 1.00138.84 |       |       | C |
| ANISOU | 1838 | C   | PHE | A | 247 | 26266   | 12629  | 13859  | -2790      | -2935 | -3905 | C |
| ATOM   | 1839 | O   | PHE | A | 247 | -10.808 | 14.156 | 3.124  | 1.00149.38 |       |       | O |
| ANISOU | 1839 | O   | PHE | A | 247 | 27177   | 14068  | 15514  | -3222      | -2676 | -3774 | O |
| ATOM   | 1840 | CB  | PHE | A | 247 | -10.802 | 17.076 | 1.841  | 1.00152.54 |       |       | C |
| ANISOU | 1840 | CB  | PHE | A | 247 | 29013   | 14137  | 14807  | -2983      | -3016 | -3412 | C |
| ATOM   | 1841 | CG  | PHE | A | 247 | -10.646 | 17.134 | 3.334  | 1.00145.38 |       |       | C |
| ANISOU | 1841 | CG  | PHE | A | 247 | 27336   | 13508  | 14395  | -3434      | -2956 | -3291 | C |
| ATOM   | 1842 | CD1 | PHE | A | 247 | -9.398  | 17.016 | 3.920  | 1.00140.17 |       |       | C |
| ANISOU | 1842 | CD1 | PHE | A | 247 | 26715   | 12852  | 13692  | -4089      | -2531 | -2981 | C |
| ATOM   | 1843 | CD2 | PHE | A | 247 | -11.751 | 17.300 | 4.153  | 1.00137.60 |       |       | C |
| ANISOU | 1843 | CD2 | PHE | A | 247 | 25578   | 12785  | 13918  | -3235      | -3283 | -3494 | C |
| ATOM   | 1844 | CE1 | PHE | A | 247 | -9.256  | 17.063 | 5.294  | 1.00133.17 |       |       | C |
| ANISOU | 1844 | CE1 | PHE | A | 247 | 25098   | 12256  | 13246  | -4506      | -2513 | -2830 | C |
| ATOM   | 1845 | CE2 | PHE | A | 247 | -11.614 | 17.351 | 5.527  | 1.00123.17 |       |       | C |
| ANISOU | 1845 | CE2 | PHE | A | 247 | 23091   | 11215  | 12493  | -3614      | -3194 | -3372 | C |
| ATOM   | 1846 | CZ  | PHE | A | 247 | -10.366 | 17.232 | 6.097  | 1.00125.11 |       |       | C |
| ANISOU | 1846 | CZ  | PHE | A | 247 | 23378   | 11490  | 12669  | -4231      | -2845 | -3019 | C |
| ATOM   | 1847 | N   | THR | A | 248 | -12.621 | 14.348 | 1.803  | 1.00128.61 |       |       | N |
| ANISOU | 1847 | N   | THR | A | 248 | 24607   | 11440  | 12821  | -2325      | -3305 | -4280 | N |
| ATOM   | 1848 | CA  | THR | A | 248 | -13.445 | 13.447 | 2.601  | 1.00126.14 |       |       | C |
| ANISOU | 1848 | CA  | THR | A | 248 | 23361   | 11373  | 13193  | -2309      | -3376 | -4588 | C |
| ATOM   | 1849 | C   | THR | A | 248 | -12.867 | 12.033 | 2.622  | 1.00119.63 |       |       | C |
| ANISOU | 1849 | C   | THR | A | 248 | 22449   | 10453  | 12553  | -2449      | -3033 | -4655 | C |
| ATOM   | 1850 | O   | THR | A | 248 | -13.123 | 11.263 | 3.548  | 1.00116.82 |       |       | O |
| ANISOU | 1850 | O   | THR | A | 248 | 21408   | 10235  | 12743  | -2618      | -2947 | -4764 | O |
| ATOM   | 1851 | CB  | THR | A | 248 | -14.895 | 13.414 | 2.086  | 1.00141.23 |       |       | C |
| ANISOU | 1851 | CB  | THR | A | 248 | 24981   | 13392  | 15287  | -1877      | -3761 | -4999 | C |
| ATOM   | 1852 | OG1 | THR | A | 248 | -15.319 | 14.747 | 1.774  | 1.00154.20 |       |       | O |
| ANISOU | 1852 | OG1 | THR | A | 248 | 26959   | 14997  | 16633  | -1684      | -4077 | -4904 | O |
| ATOM   | 1853 | CG2 | THR | A | 248 | -15.825 | 12.823 | 3.135  | 1.00142.17 |       |       | C |



|        |      |     |     |   |     |         |        |        |            |       |       |   |
|--------|------|-----|-----|---|-----|---------|--------|--------|------------|-------|-------|---|
| ANISOU | 1853 | CG2 | THR | A | 248 | 24143   | 13787  | 16088  | -1989      | -3746 | -5278 | C |
| ATOM   | 1854 | N   | THR | A | 249 | -12.080 | 11.703 | 1.603  | 1.00122.74 |       |       | N |
| ANISOU | 1854 | N   | THR | A | 249 | 23595   | 10571  | 12471  | -2377      | -2786 | -4583 | N |
| ATOM   | 1855 | CA  | THR | A | 249 | -11.427 | 10.401 | 1.527  | 1.00128.34 |       |       | C |
| ANISOU | 1855 | CA  | THR | A | 249 | 24364   | 11102  | 13298  | -2491      | -2364 | -4635 | C |
| ATOM   | 1856 | C   | THR | A | 249 | -10.440 | 10.218 | 2.674  | 1.00119.70 |       |       | C |
| ANISOU | 1856 | C   | THR | A | 249 | 22896   | 10101  | 12483  | -3021      | -1932 | -4228 | C |
| ATOM   | 1857 | O   | THR | A | 249 | -10.447 | 9.192  | 3.354  | 1.00117.88 |       |       | O |
| ANISOU | 1857 | O   | THR | A | 249 | 22011   | 9983   | 12793  | -3106      | -1727 | -4217 | O |
| ATOM   | 1858 | CB  | THR | A | 249 | -10.683 | 10.223 | 0.195  | 1.00139.20 |       |       | C |
| ANISOU | 1858 | CB  | THR | A | 249 | 26687   | 12162  | 14039  | -2304      | -2035 | -4601 | C |
| ATOM   | 1859 | OG1 | THR | A | 249 | -11.613 | 10.329 | -0.889 | 1.00131.24 |       |       | O |
| ANISOU | 1859 | OG1 | THR | A | 249 | 25870   | 11173  | 12821  | -1798      | -2438 | -4883 | O |
| ATOM   | 1860 | CG2 | THR | A | 249 | -10.001 | 8.865  | 0.142  | 1.00139.66 |       |       | C |
| ANISOU | 1860 | CG2 | THR | A | 249 | 26571   | 12141  | 14351  | -2327      | -1445 | -4555 | C |
| ATOM   | 1861 | N   | THR | A | 250 | -9.594  | 11.221 | 2.882  | 1.00119.50 |       |       | N |
| ANISOU | 1861 | N   | THR | A | 250 | 22981   | 10219  | 12207  | -3285      | -1721 | -3736 | N |
| ATOM   | 1862 | CA  | THR | A | 250 | -8.616  | 11.191 | 3.962  | 1.00139.43 |       |       | C |
| ANISOU | 1862 | CA  | THR | A | 250 | 24798   | 13089  | 15092  | -3697      | -1293 | -3166 | C |
| ATOM   | 1863 | C   | THR | A | 250 | -9.303  | 11.382 | 5.311  | 1.00124.02 |       |       | C |
| ANISOU | 1863 | C   | THR | A | 250 | 22249   | 11316  | 13558  | -3960      | -1667 | -3269 | C |
| ATOM   | 1864 | O   | THR | A | 250 | -8.918  | 10.769 | 6.308  | 1.00111.01 |       |       | O |
| ANISOU | 1864 | O   | THR | A | 250 | 19900   | 9916   | 12364  | -4189      | -1427 | -2997 | O |
| ATOM   | 1865 | CB  | THR | A | 250 | -7.543  | 12.284 | 3.779  | 1.00144.71 |       |       | C |
| ANISOU | 1865 | CB  | THR | A | 250 | 25757   | 13847  | 15378  | -3958      | -989  | -2659 | C |
| ATOM   | 1866 | OG1 | THR | A | 250 | -7.015  | 12.219 | 2.448  | 1.00153.09 |       |       | O |
| ANISOU | 1866 | OG1 | THR | A | 250 | 27499   | 14695  | 15975  | -3706      | -630  | -2611 | O |
| ATOM   | 1867 | CG2 | THR | A | 250 | -6.413  | 12.099 | 4.781  | 1.00139.42 |       |       | C |
| ANISOU | 1867 | CG2 | THR | A | 250 | 24306   | 13561  | 15107  | -4358      | -538  | -2077 | C |
| ATOM   | 1868 | N   | TYR | A | 251 | -10.325 | 12.232 | 5.329  | 1.00112.53 |       |       | N |
| ANISOU | 1868 | N   | TYR | A | 251 | 21104   | 9718   | 11933  | -3899      | -2247 | -3663 | N |
| ATOM   | 1869 | CA  | TYR | A | 251 | -11.082 | 12.520 | 6.543  | 1.00125.71 |       |       | C |
| ANISOU | 1869 | CA  | TYR | A | 251 | 22053   | 11671  | 14039  | -3978      | -2500 | -3716 | C |
| ATOM   | 1870 | C   | TYR | A | 251 | -11.724 | 11.262 | 7.115  | 1.00126.43 |       |       | C |
| ANISOU | 1870 | C   | TYR | A | 251 | 21493   | 11836  | 14707  | -3896      | -2467 | -3972 | C |
| ATOM   | 1871 | O   | TYR | A | 251 | -11.694 | 11.036 | 8.324  | 1.00116.21 |       |       | O |
| ANISOU | 1871 | O   | TYR | A | 251 | 19645   | 10733  | 13775  | -4195      | -2380 | -3821 | O |
| ATOM   | 1872 | CB  | TYR | A | 251 | -12.162 | 13.563 | 6.247  | 1.00125.91 |       |       | C |
| ANISOU | 1872 | CB  | TYR | A | 251 | 22065   | 11791  | 13986  | -3550      | -2890 | -3934 | C |
| ATOM   | 1873 | CG  | TYR | A | 251 | -12.999 | 13.974 | 7.441  | 1.00125.07 |       |       | C |
| ANISOU | 1873 | CG  | TYR | A | 251 | 21235   | 11975  | 14311  | -3563      | -3025 | -4023 | C |
| ATOM   | 1874 | CD1 | TYR | A | 251 | -12.618 | 15.040 | 8.244  | 1.00132.12 |       |       | C |
| ANISOU | 1874 | CD1 | TYR | A | 251 | 22105   | 12991  | 15103  | -3848      | -3019 | -3718 | C |
| ATOM   | 1875 | CD2 | TYR | A | 251 | -14.181 | 13.309 | 7.755  | 1.00129.06 |       |       | C |
| ANISOU | 1875 | CD2 | TYR | A | 251 | 21114   | 12622  | 15301  | -3324      | -3093 | -4440 | C |
| ATOM   | 1876 | CE1 | TYR | A | 251 | -13.381 | 15.427 | 9.330  | 1.00133.26 |       |       | C |
| ANISOU | 1876 | CE1 | TYR | A | 251 | 21663   | 13370  | 15600  | -3828      | -3085 | -3830 | C |
| ATOM   | 1877 | CE2 | TYR | A | 251 | -14.948 | 13.689 | 8.842  | 1.00134.50 |       |       | C |
| ANISOU | 1877 | CE2 | TYR | A | 251 | 21214   | 13551  | 16337  | -3367      | -3104 | -4559 | C |
| ATOM   | 1878 | CZ  | TYR | A | 251 | -14.543 | 14.750 | 9.625  | 1.00134.68 |       |       | C |
| ANISOU | 1878 | CZ  | TYR | A | 251 | 21264   | 13671  | 16238  | -3582      | -3111 | -4258 | C |
| ATOM   | 1879 | OH  | TYR | A | 251 | -15.299 | 15.140 | 10.708 | 1.00129.58 |       |       | O |
| ANISOU | 1879 | OH  | TYR | A | 251 | 20097   | 13233  | 15903  | -3601      | -3087 | -4403 | O |
| ATOM   | 1880 | N   | ASN | A | 252 | -12.302 | 10.447 | 6.239  | 1.00109.74 |       |       | N |
| ANISOU | 1880 | N   | ASN | A | 252 | 19467   | 9566   | 12661  | -3501      | -2518 | -4351 | N |
| ATOM   | 1881 | CA  | ASN | A | 252 | -13.028 | 9.257  | 6.665  | 1.00109.02 |       |       | C |
| ANISOU | 1881 | CA  | ASN | A | 252 | 18792   | 9500   | 13130  | -3416      | -2476 | -4660 | C |
| ATOM   | 1882 | C   | ASN | A | 252 | -12.115 | 8.138  | 7.154  | 1.00108.37 |       |       | C |
| ANISOU | 1882 | C   | ASN | A | 252 | 18701   | 9240   | 13237  | -3800      | -2066 | -4426 | C |
| ATOM   | 1883 | O   | ASN | A | 252 | -12.580 | 7.159  | 7.735  | 1.00119.75 |       |       | O |
| ANISOU | 1883 | O   | ASN | A | 252 | 19669   | 10668  | 15162  | -3829      | -1972 | -4581 | O |
| ATOM   | 1884 | CB  | ASN | A | 252 | -13.948 | 8.757  | 5.550  | 1.00137.60 |       |       | C |
| ANISOU | 1884 | CB  | ASN | A | 252 | 22475   | 13040  | 16765  | -2951      | -2631 | -5149 | C |
| ATOM   | 1885 | CG  | ASN | A | 252 | -15.062 | 9.738  | 5.229  | 1.00136.25 |       |       | C |
| ANISOU | 1885 | CG  | ASN | A | 252 | 22176   | 13091  | 16502  | -2685      | -2952 | -5380 | C |
| ATOM   | 1886 | OD1 | ASN | A | 252 | -15.441 | 10.563 | 6.062  | 1.00135.66 |       |       | O |
| ANISOU | 1886 | OD1 | ASN | A | 252 | 21768   | 13235  | 16543  | -2800      | -3027 | -5303 | O |
| ATOM   | 1887 | ND2 | ASN | A | 252 | -15.595 | 9.650  | 4.016  | 1.00139.42 |       |       | N |
| ANISOU | 1887 | ND2 | ASN | A | 252 | 22892   | 13414  | 16667  | -2347      | -3124 | -5642 | N |
| ATOM   | 1888 | N   | VAL | A | 253 | -10.816 | 8.291  | 6.916  | 1.00122.41 |       |       | N |

|        |      |     |     |   |     |         |        |        |            |       |       |   |
|--------|------|-----|-----|---|-----|---------|--------|--------|------------|-------|-------|---|
| ANISOU | 1888 | N   | VAL | A | 253 | 20607   | 11131  | 14772  | -3876      | -1651 | -3871 | N |
| ATOM   | 1889 | CA  | VAL | A | 253 | -9.824  | 7.345  | 7.414  | 1.00115.98 |       |       | C |
| ANISOU | 1889 | CA  | VAL | A | 253 | 19311   | 10479  | 14278  | -3974      | -1097 | -3376 | C |
| ATOM   | 1890 | C   | VAL | A | 253 | -9.378  | 7.741  | 8.820  | 1.00111.97 |       |       | C |
| ANISOU | 1890 | C   | VAL | A | 253 | 18257   | 10313  | 13974  | -4384      | -1054 | -2920 | C |
| ATOM   | 1891 | O   | VAL | A | 253 | -9.172  | 6.887  | 9.682  | 1.00115.19 |       |       | O |
| ANISOU | 1891 | O   | VAL | A | 253 | 18151   | 10833  | 14784  | -4491      | -831  | -2694 | O |
| ATOM   | 1892 | CB  | VAL | A | 253 | -8.599  | 7.272  | 6.484  | 1.00115.33 |       |       | C |
| ANISOU | 1892 | CB  | VAL | A | 253 | 19512   | 10399  | 13909  | -3823      | -622  | -2992 | C |
| ATOM   | 1893 | CG1 | VAL | A | 253 | -7.552  | 6.325  | 7.050  | 1.00115.26 |       |       | C |
| ANISOU | 1893 | CG1 | VAL | A | 253 | 18931   | 10575  | 14290  | -3881      | -77   | -2467 | C |
| ATOM   | 1894 | CG2 | VAL | A | 253 | -9.020  | 6.836  | 5.089  | 1.00117.21 |       |       | C |
| ANISOU | 1894 | CG2 | VAL | A | 253 | 20373   | 10285  | 13878  | -3414      | -645  | -3450 | C |
| ATOM   | 1895 | N   | VAL | A | 254 | -9.234  | 9.045  | 9.042  | 1.00106.33 |       |       | N |
| ANISOU | 1895 | N   | VAL | A | 254 | 17713   | 9736   | 12951  | -4611      | -1281 | -2789 | N |
| ATOM   | 1896 | CA  | VAL | A | 254 | -8.917  | 9.575  | 10.364 | 1.00107.55 |       |       | C |
| ANISOU | 1896 | CA  | VAL | A | 254 | 17442   | 10199  | 13222  | -5029      | -1328 | -2436 | C |
| ATOM   | 1897 | C   | VAL | A | 254 | -10.122 | 9.408  | 11.286 | 1.00107.46 |       |       | C |
| ANISOU | 1897 | C   | VAL | A | 254 | 17184   | 10147  | 13499  | -5129      | -1634 | -2829 | C |
| ATOM   | 1898 | O   | VAL | A | 254 | -9.985  | 9.000  | 12.438 | 1.00100.16 |       |       | O |
| ANISOU | 1898 | O   | VAL | A | 254 | 15791   | 9413   | 12853  | -5371      | -1522 | -2587 | O |
| ATOM   | 1899 | CB  | VAL | A | 254 | -8.529  | 11.073 | 10.292 | 1.00103.67 |       |       | C |
| ANISOU | 1899 | CB  | VAL | A | 254 | 17282   | 9800   | 12308  | -5261      | -1499 | -2268 | C |
| ATOM   | 1900 | CG1 | VAL | A | 254 | -8.121  | 11.608 | 11.662 | 1.00102.09 |       |       | C |
| ANISOU | 1900 | CG1 | VAL | A | 254 | 16663   | 9923   | 12203  | -5726      | -1549 | -1910 | C |
| ATOM   | 1901 | CG2 | VAL | A | 254 | -7.411  | 11.285 | 9.289  | 1.00106.52 |       |       | C |
| ANISOU | 1901 | CG2 | VAL | A | 254 | 17938   | 10158  | 12376  | -5183      | -1144 | -1929 | C |
| ATOM   | 1902 | N   | LYS | A | 255 | -11.300 | 9.711  | 10.749 | 1.00109.86 |       |       | N |
| ANISOU | 1902 | N   | LYS | A | 255 | 17773   | 10223  | 13744  | -4882      | -1999 | -3421 | N |
| ATOM   | 1903 | CA  | LYS | A | 255 | -12.561 | 9.723  | 11.498 | 1.00111.65 |       |       | C |
| ANISOU | 1903 | CA  | LYS | A | 255 | 17464   | 10605  | 14354  | -4614      | -2175 | -3725 | C |
| ATOM   | 1904 | C   | LYS | A | 255 | -12.757 | 8.617  | 12.552 | 1.00123.14 |       |       | C |
| ANISOU | 1904 | C   | LYS | A | 255 | 18428   | 12091  | 16270  | -4796      | -1967 | -3670 | C |
| ATOM   | 1905 | O   | LYS | A | 255 | -13.236 | 8.901  | 13.649 | 1.00141.60 |       |       | O |
| ANISOU | 1905 | O   | LYS | A | 255 | 20380   | 14622  | 18799  | -4834      | -2006 | -3625 | O |
| ATOM   | 1906 | CB  | LYS | A | 255 | -13.752 | 9.783  | 10.528 | 1.00109.55 |       |       | C |
| ANISOU | 1906 | CB  | LYS | A | 255 | 17231   | 10237  | 14156  | -4072      | -2417 | -4302 | C |
| ATOM   | 1907 | CG  | LYS | A | 255 | -15.089 | 10.115 | 11.169 | 1.00122.13 |       |       | C |
| ANISOU | 1907 | CG  | LYS | A | 255 | 18265   | 12027  | 16111  | -3860      | -2526 | -4688 | C |
| ATOM   | 1908 | CD  | LYS | A | 255 | -16.126 | 10.446 | 10.104 | 1.00139.74 |       |       | C |
| ANISOU | 1908 | CD  | LYS | A | 255 | 20591   | 14304  | 18198  | -3549      | -2605 | -5172 | C |
| ATOM   | 1909 | CE  | LYS | A | 255 | -17.500 | 10.679 | 10.712 | 1.00158.78 |       |       | C |
| ANISOU | 1909 | CE  | LYS | A | 255 | 22655   | 16977  | 20696  | -3632      | -2425 | -5407 | C |
| ATOM   | 1910 | NZ  | LYS | A | 255 | -18.012 | 9.458  | 11.396 | 1.00167.14 |       |       | N |
| ANISOU | 1910 | NZ  | LYS | A | 255 | 23657   | 18029  | 21818  | -3927      | -2113 | -5252 | N |
| ATOM   | 1911 | N   | PRO | A | 256 | -12.394 | 7.359  | 12.234 | 1.00108.82 |       |       | N |
| ANISOU | 1911 | N   | PRO | A | 256 | 14840   | 11838  | 14668  | -4143      | -1549 | -1398 | N |
| ATOM   | 1912 | CA  | PRO | A | 256 | -12.498 | 6.344  | 13.291 | 1.00 99.63 |       |       | C |
| ANISOU | 1912 | CA  | PRO | A | 256 | 13345   | 10850  | 13661  | -4230      | -1501 | -1340 | C |
| ATOM   | 1913 | C   | PRO | A | 256 | -11.495 | 6.516  | 14.433 | 1.00 96.96 |       |       | C |
| ANISOU | 1913 | C   | PRO | A | 256 | 12914   | 10528  | 13397  | -4418      | -1497 | -1158 | C |
| ATOM   | 1914 | O   | PRO | A | 256 | -11.710 | 5.941  | 15.501 | 1.00 88.11 |       |       | O |
| ANISOU | 1914 | O   | PRO | A | 256 | 11596   | 9557   | 12323  | -4511      | -1521 | -1110 | O |
| ATOM   | 1915 | CB  | PRO | A | 256 | -12.213 | 5.034  | 12.549 | 1.00 97.92 |       |       | C |
| ANISOU | 1915 | CB  | PRO | A | 256 | 13022   | 10576  | 13608  | -4294      | -1339 | -1290 | C |
| ATOM   | 1916 | CG  | PRO | A | 256 | -12.570 | 5.314  | 11.142 | 1.00105.33 |       |       | C |
| ANISOU | 1916 | CG  | PRO | A | 256 | 14277   | 11366  | 14379  | -4210      | -1358 | -1409 | C |
| ATOM   | 1917 | CD  | PRO | A | 256 | -12.170 | 6.738  | 10.916 | 1.00113.25 |       |       | C |
| ANISOU | 1917 | CD  | PRO | A | 256 | 15547   | 12255  | 15226  | -4167      | -1430 | -1402 | C |
| ATOM   | 1918 | N   | PHE | A | 257 | -10.426 | 7.281  | 14.223 | 1.00 90.06 |       |       | N |
| ANISOU | 1918 | N   | PHE | A | 257 | 12193   | 9491   | 12535  | -4507      | -1496 | -1032 | N |
| ATOM   | 1919 | CA  | PHE | A | 257 | -9.421  | 7.463  | 15.269 | 1.00100.29 |       |       | C |
| ANISOU | 1919 | CA  | PHE | A | 257 | 13407   | 10770  | 13927  | -4743      | -1582 | -802  | C |
| ATOM   | 1920 | C   | PHE | A | 257 | -9.943  | 8.396  | 16.348 | 1.00100.35 |       |       | C |
| ANISOU | 1920 | C   | PHE | A | 257 | 13621   | 10854  | 13653  | -4774      | -1749 | -912  | C |
| ATOM   | 1921 | O   | PHE | A | 257 | -9.572  | 8.282  | 17.514 | 1.00 90.79 |       |       | O |
| ANISOU | 1921 | O   | PHE | A | 257 | 12381   | 9697   | 12418  | -5004      | -1865 | -775  | O |
| ATOM   | 1922 | CB  | PHE | A | 257 | -8.120  | 8.046  | 14.709 | 1.00113.16 |       |       | C |
| ANISOU | 1922 | CB  | PHE | A | 257 | 15112   | 12176  | 15708  | -4848      | -1541 | -602  | C |
| ATOM   | 1923 | CG  | PHE | A | 257 | -7.531  | 7.259  | 13.574 | 1.00124.52 |       |       | C |

|        |      |     |     |   |     |         |        |        |            |       |       |   |
|--------|------|-----|-----|---|-----|---------|--------|--------|------------|-------|-------|---|
| ANISOU | 1923 | CG  | PHE | A | 257 | 16426   | 13464  | 17420  | -4812      | -1257 | -512  | C |
| ATOM   | 1924 | CD1 | PHE | A | 257 | -7.814  | 5.913  | 13.414 | 1.00132.34 |       |       | C |
| ANISOU | 1924 | CD1 | PHE | A | 257 | 17185   | 14509  | 18590  | -4780      | -1095 | -522  | C |
| ATOM   | 1925 | CD2 | PHE | A | 257 | -6.685  | 7.872  | 12.666 | 1.00127.76 |       |       | C |
| ANISOU | 1925 | CD2 | PHE | A | 257 | 16990   | 13648  | 17905  | -4822      | -1107 | -423  | C |
| ATOM   | 1926 | CE1 | PHE | A | 257 | -7.269  | 5.196  | 12.366 | 1.00137.42 |       |       | C |
| ANISOU | 1926 | CE1 | PHE | A | 257 | 17793   | 14956  | 19464  | -4755      | -762  | -471  | C |
| ATOM   | 1927 | CE2 | PHE | A | 257 | -6.137  | 7.162  | 11.619 | 1.00136.83 |       |       | C |
| ANISOU | 1927 | CE2 | PHE | A | 257 | 18094   | 14612  | 19285  | -4798      | -745  | -362  | C |
| ATOM   | 1928 | CZ  | PHE | A | 257 | -6.429  | 5.823  | 11.467 | 1.00139.29 |       |       | C |
| ANISOU | 1928 | CZ  | PHE | A | 257 | 18215   | 14953  | 19757  | -4762      | -558  | -398  | C |
| ATOM   | 1929 | N   | LEU | A | 258 | -10.805 | 9.323  | 15.944 | 1.00       | 94.15 |       | N |
| ANISOU | 1929 | N   | LEU | A | 258 | 13078   | 10039  | 12657  | -4558      | -1757 | -1149 | N |
| ATOM   | 1930 | CA  | LEU | A | 258 | -11.253 | 10.393 | 16.826 | 1.00       | 95.67 |       | C |
| ANISOU | 1930 | CA  | LEU | A | 258 | 13536   | 10213  | 12601  | -4553      | -1827 | -1283 | C |
| ATOM   | 1931 | C   | LEU | A | 258 | -12.296 | 9.941  | 17.841 | 1.00       | 95.41 |       | C |
| ANISOU | 1931 | C   | LEU | A | 258 | 13422   | 10348  | 12480  | -4522      | -1746 | -1418 | C |
| ATOM   | 1932 | O   | LEU | A | 258 | -13.180 | 9.142  | 17.531 | 1.00       | 95.27 |       | O |
| ANISOU | 1932 | O   | LEU | A | 258 | 13159   | 10456  | 12581  | -4363      | -1658 | -1499 | O |
| ATOM   | 1933 | CB  | LEU | A | 258 | -11.803 | 11.564 | 16.005 | 1.00       | 92.19 |       | C |
| ANISOU | 1933 | CB  | LEU | A | 258 | 13347   | 9627   | 12054  | -4308      | -1839 | -1459 | C |
| ATOM   | 1934 | CG  | LEU | A | 258 | -10.882 | 12.174 | 14.943 | 1.00105.72 |       |       | C |
| ANISOU | 1934 | CG  | LEU | A | 258 | 15218   | 11152  | 13799  | -4332      | -1890 | -1347 | C |
| ATOM   | 1935 | CD1 | LEU | A | 258 | -11.539 | 13.382 | 14.299 | 1.00105.15 |       |       | C |
| ANISOU | 1935 | CD1 | LEU | A | 258 | 15420   | 10931  | 13601  | -4106      | -1947 | -1507 | C |
| ATOM   | 1936 | CD2 | LEU | A | 258 | -9.525  | 12.547 | 15.522 | 1.00       | 92.78 |       | C |
| ANISOU | 1936 | CD2 | LEU | A | 258 | 13661   | 9411   | 12181  | -4630      | -1978 | -1125 | C |
| ATOM   | 1937 | N   | LYS | A | 259 | -12.178 | 10.460 | 19.060 | 1.00       | 93.84 |       | N |
| ANISOU | 1937 | N   | LYS | A | 259 | 13468   | 10130  | 12058  | -4707      | -1769 | -1433 | N |
| ATOM   | 1938 | CA  | LYS | A | 259 | -13.207 | 10.275 | 20.072 | 1.00102.41 |       |       | C |
| ANISOU | 1938 | CA  | LYS | A | 259 | 14591   | 11321  | 12999  | -4679      | -1604 | -1596 | C |
| ATOM   | 1939 | C   | LYS | A | 259 | -14.349 | 11.237 | 19.787 | 1.00103.01 |       |       | C |
| ANISOU | 1939 | C   | LYS | A | 259 | 14802   | 11293  | 13045  | -4344      | -1434 | -1867 | C |
| ATOM   | 1940 | O   | LYS | A | 259 | -14.194 | 12.180 | 19.011 | 1.00       | 96.69 |       | O |
| ANISOU | 1940 | O   | LYS | A | 259 | 14154   | 10324  | 12259  | -4202      | -1509 | -1911 | O |
| ATOM   | 1941 | CB  | LYS | A | 259 | -12.657 | 10.531 | 21.477 | 1.00125.53 |       |       | C |
| ANISOU | 1941 | CB  | LYS | A | 259 | 17857   | 14215  | 15625  | -5046      | -1668 | -1524 | C |
| ATOM   | 1942 | CG  | LYS | A | 259 | -11.636 | 9.516  | 21.960 | 1.00144.33 |       |       | C |
| ANISOU | 1942 | CG  | LYS | A | 259 | 20060   | 16689  | 18092  | -5408      | -1885 | -1195 | C |
| ATOM   | 1943 | CD  | LYS | A | 259 | -11.569 | 9.498  | 23.482 | 1.00157.19 |       |       | C |
| ANISOU | 1943 | CD  | LYS | A | 259 | 22026   | 18330  | 19367  | -5777      | -1938 | -1151 | C |
| ATOM   | 1944 | CE  | LYS | A | 259 | -11.398 | 10.900 | 24.051 | 1.00158.73 |       |       | C |
| ANISOU | 1944 | CE  | LYS | A | 259 | 22828   | 18307  | 19175  | -5918      | -1970 | -1289 | C |
| ATOM   | 1945 | NZ  | LYS | A | 259 | -11.492 | 10.916 | 25.537 | 1.00167.11 |       |       | N |
| ANISOU | 1945 | NZ  | LYS | A | 259 | 24360   | 19349  | 19787  | -6300      | -1965 | -1303 | N |
| ATOM   | 1946 | N   | SER | A | 260 | -15.491 | 10.999 | 20.421 | 1.00110.76 |       |       | N |
| ANISOU | 1946 | N   | SER | A | 260 | 15703   | 12351  | 14031  | -4219      | -1191 | -2022 | N |
| ATOM   | 1947 | CA  | SER | A | 260 | -16.668 | 11.833 | 20.217 | 1.00120.37 |       |       | C |
| ANISOU | 1947 | CA  | SER | A | 260 | 16947   | 13438  | 15352  | -3874      | -985  | -2240 | C |
| ATOM   | 1948 | C   | SER | A | 260 | -16.391 | 13.289 | 20.571 | 1.00117.88 |       |       | C |
| ANISOU | 1948 | C   | SER | A | 260 | 17124   | 12853  | 14811  | -3880      | -929  | -2367 | C |
| ATOM   | 1949 | O   | SER | A | 260 | -16.915 | 14.197 | 19.931 | 1.00114.84 |       |       | O |
| ANISOU | 1949 | O   | SER | A | 260 | 16775   | 12286  | 14575  | -3591      | -897  | -2470 | O |
| ATOM   | 1950 | CB  | SER | A | 260 | -17.844 | 11.303 | 21.038 | 1.00142.26 |       |       | C |
| ANISOU | 1950 | CB  | SER | A | 260 | 19539   | 16308  | 18204  | -3782      | -655  | -2353 | C |
| ATOM   | 1951 | OG  | SER | A | 260 | -17.473 | 11.116 | 22.392 | 1.00154.88 |       |       | O |
| ANISOU | 1951 | OG  | SER | A | 260 | 21443   | 17941  | 19462  | -4104      | -510  | -2362 | O |
| ATOM   | 1952 | N   | LYS | A | 261 | -15.554 | 13.501 | 21.583 | 1.00126.38 |       |       | N |
| ANISOU | 1952 | N   | LYS | A | 261 | 18599   | 13883  | 15535  | -4236      | -956  | -2336 | N |
| ATOM   | 1953 | CA  | LYS | A | 261 | -15.224 | 14.847 | 22.038 | 1.00127.48 |       |       | C |
| ANISOU | 1953 | CA  | LYS | A | 261 | 19296   | 13741  | 15401  | -4318      | -916  | -2463 | C |
| ATOM   | 1954 | C   | LYS | A | 261 | -14.519 | 15.662 | 20.960 | 1.00113.01 |       |       | C |
| ANISOU | 1954 | C   | LYS | A | 261 | 17523   | 11756  | 13659  | -4244      | -1191 | -2379 | C |
| ATOM   | 1955 | O   | LYS | A | 261 | -14.910 | 16.794 | 20.679 | 1.00106.80 |       |       | O |
| ANISOU | 1955 | O   | LYS | A | 261 | 16957   | 10725  | 12896  | -4024      | -1097 | -2533 | O |
| ATOM   | 1956 | CB  | LYS | A | 261 | -14.355 | 14.795 | 23.297 | 1.00141.14 |       |       | C |
| ANISOU | 1956 | CB  | LYS | A | 261 | 21475   | 15451  | 16701  | -4815      | -1008 | -2388 | C |
| ATOM   | 1957 | CG  | LYS | A | 261 | -13.981 | 16.168 | 23.843 | 1.00159.44 |       |       | C |
| ANISOU | 1957 | CG  | LYS | A | 261 | 24463   | 17444  | 18673  | -4973      | -992  | -2527 | C |
| ATOM   | 1958 | CD  | LYS | A | 261 | -13.068 | 16.063 | 25.058 | 1.00170.29 |       |       | C |

|        |      |     |     |   |     |         |        |        |            |       |       |   |
|--------|------|-----|-----|---|-----|---------|--------|--------|------------|-------|-------|---|
| ANISOU | 1958 | CD  | LYS | A | 261 | 26326   | 18787  | 19589  | -5552      | -1196 | -2401 | C |
| ATOM   | 1959 | CE  | LYS | A | 261 | -11.710 | 15.480 | 24.688 | 1.00168.83 |       |       | C |
| ANISOU | 1959 | CE  | LYS | A | 261 | 25879   | 18732  | 19535  | -5866      | -1720 | -2001 | C |
| ATOM   | 1960 | NZ  | LYS | A | 261 | -10.830 | 15.293 | 25.879 | 1.00161.05 |       |       | N |
| ANISOU | 1960 | NZ  | LYS | A | 261 | 25306   | 17713  | 18173  | -6470      | -2022 | -1795 | N |
| ATOM   | 1961 | N   | LEU | A | 262 | -13.482 | 15.085 | 20.361 | 1.00105.17 |       |       | N |
| ANISOU | 1961 | N   | LEU | A | 262 | 16331   | 10880  | 12747  | -4426      | -1494 | -2125 | N |
| ATOM   | 1962 | CA  | LEU | A | 262 | -12.683 | 15.798 | 19.366 | 1.00112.32 |       |       | C |
| ANISOU | 1962 | CA  | LEU | A | 262 | 17316   | 11638  | 13724  | -4411      | -1716 | -2014 | C |
| ATOM   | 1963 | C   | LEU | A | 262 | -13.342 | 15.826 | 17.989 | 1.00112.71 |       |       | C |
| ANISOU | 1963 | C   | LEU | A | 262 | 17097   | 11684  | 14043  | -4039      | -1711 | -2050 | C |
| ATOM   | 1964 | O   | LEU | A | 262 | -13.238 | 16.818 | 17.265 | 1.00118.63 |       |       | O |
| ANISOU | 1964 | O   | LEU | A | 262 | 18031   | 12235  | 14809  | -3913      | -1794 | -2070 | O |
| ATOM   | 1965 | CB  | LEU | A | 262 | -11.280 | 15.193 | 19.259 | 1.00116.22 |       |       | C |
| ANISOU | 1965 | CB  | LEU | A | 262 | 17689   | 12206  | 14265  | -4753      | -1970 | -1702 | C |
| ATOM   | 1966 | CG  | LEU | A | 262 | -10.354 | 15.854 | 18.234 | 1.00       | 98.94 |       | C |
| ANISOU | 1966 | CG  | LEU | A | 262 | 15556   | 9856   | 12182  | -4770      | -2140 | -1553 | C |
| ATOM   | 1967 | CD1 | LEU | A | 262 | -10.163 | 17.329 | 18.546 | 1.00101.44 |       |       | C |
| ANISOU | 1967 | CD1 | LEU | A | 262 | 16367   | 9899   | 12277  | -4830      | -2206 | -1653 | C |
| ATOM   | 1968 | CD2 | LEU | A | 262 | -9.015  | 15.142 | 18.168 | 1.00       | 97.97 |       | C |
| ANISOU | 1968 | CD2 | LEU | A | 262 | 15209   | 9783   | 12233  | -5083      | -2310 | -1211 | C |
| ATOM   | 1969 | N   | LEU | A | 263 | -14.015 | 14.737 | 17.633 | 1.00103.06 |       |       | N |
| ANISOU | 1969 | N   | LEU | A | 263 | 15475   | 10668  | 13016  | -3901      | -1650 | -2040 | N |
| ATOM   | 1970 | CA  | LEU | A | 263 | -14.674 | 14.636 | 16.337 | 1.00105.93 |       |       | C |
| ANISOU | 1970 | CA  | LEU | A | 263 | 15622   | 11027  | 13600  | -3621      | -1718 | -2044 | C |
| ATOM   | 1971 | C   | LEU | A | 263 | -15.666 | 15.774 | 16.153 | 1.00121.60 |       |       | C |
| ANISOU | 1971 | C   | LEU | A | 263 | 17730   | 12802  | 15671  | -3315      | -1663 | -2199 | C |
| ATOM   | 1972 | O   | LEU | A | 263 | -15.805 | 16.322 | 15.061 | 1.00125.49 |       |       | O |
| ANISOU | 1972 | O   | LEU | A | 263 | 18261   | 13161  | 16257  | -3159      | -1828 | -2157 | O |
| ATOM   | 1973 | CB  | LEU | A | 263 | -15.392 | 13.293 | 16.203 | 1.00       | 99.63 |       | C |
| ANISOU | 1973 | CB  | LEU | A | 263 | 14413   | 10460  | 12982  | -3557      | -1668 | -2027 | C |
| ATOM   | 1974 | CG  | LEU | A | 263 | -15.145 | 12.506 | 14.915 | 1.00       | 94.63 |       | C |
| ANISOU | 1974 | CG  | LEU | A | 263 | 13609   | 9886   | 12459  | -3560      | -1817 | -1903 | C |
| ATOM   | 1975 | CD1 | LEU | A | 263 | -16.011 | 11.264 | 14.888 | 1.00       | 96.60 |       | C |
| ANISOU | 1975 | CD1 | LEU | A | 263 | 13495   | 10329  | 12882  | -3502      | -1780 | -1912 | C |
| ATOM   | 1976 | CD2 | LEU | A | 263 | -15.397 | 13.364 | 13.689 | 1.00       | 98.51 |       | C |
| ANISOU | 1976 | CD2 | LEU | A | 263 | 14269   | 10189  | 12970  | -3386      | -1982 | -1907 | C |
| ATOM   | 1977 | N   | GLU | A | 264 | -16.344 | 16.133 | 17.237 | 1.00102.65 |       |       | N |
| ANISOU | 1977 | N   | GLU | A | 264 | 15412   | 10342  | 13248  | -3241      | -1409 | -2365 | N |
| ATOM   | 1978 | CA  | GLU | A | 264 | -17.333 | 17.200 | 17.205 | 1.00130.21 |       |       | C |
| ANISOU | 1978 | CA  | GLU | A | 264 | 18977   | 13581  | 16915  | -2921      | -1266 | -2510 | C |
| ATOM   | 1979 | C   | GLU | A | 264 | -16.673 | 18.572 | 17.177 | 1.00107.31 |       |       | C |
| ANISOU | 1979 | C   | GLU | A | 264 | 16550   | 10386  | 13838  | -2962      | -1326 | -2553 | C |
| ATOM   | 1980 | O   | GLU | A | 264 | -17.325 | 19.576 | 16.895 | 1.00109.98 |       |       | O |
| ANISOU | 1980 | O   | GLU | A | 264 | 16971   | 10458  | 14360  | -2689      | -1268 | -2632 | O |
| ATOM   | 1981 | CB  | GLU | A | 264 | -18.276 | 17.081 | 18.403 | 1.00135.88 |       |       | C |
| ANISOU | 1981 | CB  | GLU | A | 264 | 19644   | 14290  | 17693  | -2826      | -853  | -2687 | C |
| ATOM   | 1982 | CG  | GLU | A | 264 | -19.143 | 15.829 | 18.373 | 1.00156.84 |       |       | C |
| ANISOU | 1982 | CG  | GLU | A | 264 | 21782   | 17199  | 20611  | -2735      | -782  | -2635 | C |
| ATOM   | 1983 | CD  | GLU | A | 264 | -19.759 | 15.507 | 19.722 | 1.00182.11 |       |       | C |
| ANISOU | 1983 | CD  | GLU | A | 264 | 24990   | 20437  | 23766  | -2765      | -334  | -2782 | C |
| ATOM   | 1984 | OE1 | GLU | A | 264 | -19.633 | 16.334 | 20.650 | 1.00197.21 |       |       | O |
| ANISOU | 1984 | OE1 | GLU | A | 264 | 27354   | 22139  | 25439  | -2829      | -44   | -2953 | O |
| ATOM   | 1985 | OE2 | GLU | A | 264 | -20.363 | 14.421 | 19.854 | 1.00182.84 |       |       | O |
| ANISOU | 1985 | OE2 | GLU | A | 264 | 24684   | 20750  | 24039  | -2750      | -257  | -2730 | O |
| ATOM   | 1986 | N   | ARG | A | 265 | -15.375 | 18.610 | 17.463 | 1.00110.74 |       |       | N |
| ANISOU | 1986 | N   | ARG | A | 265 | 17267   | 10844  | 13966  | -3312      | -1460 | -2470 | N |
| ATOM   | 1987 | CA  | ARG | A | 265 | -14.634 | 19.868 | 17.483 | 1.00118.54 |       |       | C |
| ANISOU | 1987 | CA  | ARG | A | 265 | 18717   | 11552  | 14771  | -3418      | -1554 | -2485 | C |
| ATOM   | 1988 | C   | ARG | A | 265 | -13.913 | 20.128 | 16.160 | 1.00111.15 |       |       | C |
| ANISOU | 1988 | C   | ARG | A | 265 | 17761   | 10574  | 13897  | -3431      | -1855 | -2292 | C |
| ATOM   | 1989 | O   | ARG | A | 265 | -13.255 | 21.157 | 15.996 | 1.00106.62 |       |       | O |
| ANISOU | 1989 | O   | ARG | A | 265 | 17532   | 9768   | 13210  | -3521      | -1967 | -2263 | O |
| ATOM   | 1990 | CB  | ARG | A | 265 | -13.637 | 19.898 | 18.648 | 1.00120.71 |       |       | C |
| ANISOU | 1990 | CB  | ARG | A | 265 | 19354   | 11819  | 14690  | -3844      | -1564 | -2473 | C |
| ATOM   | 1991 | CG  | ARG | A | 265 | -14.274 | 19.905 | 20.036 | 1.00110.84 |       |       | C |
| ANISOU | 1991 | CG  | ARG | A | 265 | 18345   | 10522  | 13249  | -3896      | -1231 | -2694 | C |
| ATOM   | 1992 | CD  | ARG | A | 265 | -13.222 | 20.098 | 21.120 | 1.00112.24 |       |       | C |
| ANISOU | 1992 | CD  | ARG | A | 265 | 19012   | 10630  | 13002  | -4393      | -1349 | -2652 | C |
| ATOM   | 1993 | NE  | ARG | A | 265 | -13.764 | 19.969 | 22.470 | 1.00115.38 |       |       | N |

|        |      |     |     |   |     |         |        |        |            |       |       |   |
|--------|------|-----|-----|---|-----|---------|--------|--------|------------|-------|-------|---|
| ANISOU | 1993 | NE  | ARG | A | 265 | 19731   | 10990  | 13119  | -4525      | -1024 | -2854 | N |
| ATOM   | 1994 | CZ  | ARG | A | 265 | -14.386 | 20.945 | 23.122 | 1.00130.76 |       |       | C |
| ANISOU | 1994 | CZ  | ARG | A | 265 | 22166   | 12616  | 14901  | -4429      | -667  | -3142 | C |
| ATOM   | 1995 | NH1 | ARG | A | 265 | -14.557 | 22.127 | 22.546 | 1.00141.03 |       |       | N |
| ANISOU | 1995 | NH1 | ARG | A | 265 | 23641   | 13607  | 16338  | -4178      | -631  | -3246 | N |
| ATOM   | 1996 | NH2 | ARG | A | 265 | -14.844 | 20.738 | 24.350 | 1.00137.77 |       |       | N |
| ANISOU | 1996 | NH2 | ARG | A | 265 | 23394   | 13462  | 15490  | -4587      | -311  | -3325 | N |
| ATOM   | 1997 | N   | VAL | A | 266 | -14.040 | 19.191 | 15.223 | 1.00103.22 |       |       | N |
| ANISOU | 1997 | N   | VAL | A | 266 | 16398   | 9771   | 13049  | -3365      | -1963 | -2164 | N |
| ATOM   | 1998 | CA  | VAL | A | 266 | -13.442 | 19.341 | 13.899 | 1.00111.49 |       |       | C |
| ANISOU | 1998 | CA  | VAL | A | 266 | 17479   | 10765  | 14118  | -3387      | -2177 | -1996 | C |
| ATOM   | 1999 | C   | VAL | A | 266 | -14.406 | 20.052 | 12.954 | 1.00122.08 |       |       | C |
| ANISOU | 1999 | C   | VAL | A | 266 | 18834   | 11926  | 15625  | -3071      | -2289 | -2021 | C |
| ATOM   | 2000 | O   | VAL | A | 266 | -15.538 | 19.609 | 12.762 | 1.00122.73 |       |       | O |
| ANISOU | 2000 | O   | VAL | A | 266 | 18633   | 12080  | 15919  | -2847      | -2285 | -2060 | O |
| ATOM   | 2001 | CB  | VAL | A | 266 | -13.043 | 17.979 | 13.295 | 1.00114.69 |       |       | C |
| ANISOU | 2001 | CB  | VAL | A | 266 | 17594   | 11416  | 14568  | -3511      | -2206 | -1853 | C |
| ATOM   | 2002 | CG1 | VAL | A | 266 | -12.468 | 18.163 | 11.902 | 1.00       | 98.96 |       | C |
| ANISOU | 2002 | CG1 | VAL | A | 266 | 15728   | 9321   | 12552  | -3545      | -2336 | -1706 | C |
| ATOM   | 2003 | CG2 | VAL | A | 266 | -12.043 | 17.271 | 14.191 | 1.00115.43 |       |       | C |
| ANISOU | 2003 | CG2 | VAL | A | 266 | 17615   | 11652  | 14591  | -3823      | -2137 | -1760 | C |
| ATOM   | 2004 | N   | PHE | A | 267 | -13.955 | 21.157 | 12.370 | 1.00105.08 |       |       | N |
| ANISOU | 2004 | N   | PHE | A | 267 | 16995   | 9523   | 13407  | -3073      | -2424 | -1961 | N |
| ATOM   | 2005 | CA  | PHE | A | 267 | -14.806 | 21.957 | 11.496 | 1.00111.42 |       |       | C |
| ANISOU | 2005 | CA  | PHE | A | 267 | 17848   | 10107  | 14381  | -2799      | -2589 | -1937 | C |
| ATOM   | 2006 | C   | PHE | A | 267 | -14.245 | 22.065 | 10.081 | 1.00111.59 |       |       | C |
| ANISOU | 2006 | C   | PHE | A | 267 | 18038   | 10069  | 14293  | -2901      | -2831 | -1743 | C |
| ATOM   | 2007 | O   | PHE | A | 267 | -13.071 | 22.384 | 9.890  | 1.00113.72 |       |       | O |
| ANISOU | 2007 | O   | PHE | A | 267 | 18558   | 10278  | 14375  | -3131      | -2827 | -1655 | O |
| ATOM   | 2008 | CB  | PHE | A | 267 | -15.006 | 23.358 | 12.079 | 1.00124.46 |       |       | C |
| ANISOU | 2008 | CB  | PHE | A | 267 | 19783   | 11427  | 16080  | -2664      | -2513 | -2054 | C |
| ATOM   | 2009 | CG  | PHE | A | 267 | -15.666 | 23.366 | 13.429 | 1.00147.57 |       |       | C |
| ANISOU | 2009 | CG  | PHE | A | 267 | 22646   | 14335  | 19087  | -2553      | -2194 | -2274 | C |
| ATOM   | 2010 | CD1 | PHE | A | 267 | -16.976 | 22.938 | 13.578 | 1.00160.92 |       |       | C |
| ANISOU | 2010 | CD1 | PHE | A | 267 | 23963   | 16074  | 21104  | -2265      | -2066 | -2337 | C |
| ATOM   | 2011 | CD2 | PHE | A | 267 | -14.982 | 23.814 | 14.547 | 1.00153.69 |       |       | C |
| ANISOU | 2011 | CD2 | PHE | A | 267 | 23768   | 15017  | 19609  | -2767      | -2016 | -2405 | C |
| ATOM   | 2012 | CE1 | PHE | A | 267 | -17.588 | 22.949 | 14.818 | 1.00163.50 |       |       | C |
| ANISOU | 2012 | CE1 | PHE | A | 267 | 24262   | 16356  | 21505  | -2167      | -1679 | -2545 | C |
| ATOM   | 2013 | CE2 | PHE | A | 267 | -15.590 | 23.828 | 15.790 | 1.00159.05 |       |       | C |
| ANISOU | 2013 | CE2 | PHE | A | 267 | 24501   | 15645  | 20285  | -2704      | -1672 | -2626 | C |
| ATOM   | 2014 | CZ  | PHE | A | 267 | -16.893 | 23.395 | 15.925 | 1.00160.37 |       |       | C |
| ANISOU | 2014 | CZ  | PHE | A | 267 | 24294   | 15859  | 20780  | -2391      | -1459 | -2706 | C |
| ATOM   | 2015 | N   | VAL | A | 268 | -15.097 | 21.800 | 9.094  | 1.00116.23 |       |       | N |
| ANISOU | 2015 | N   | VAL | A | 268 | 18508   | 10654  | 15001  | -2757      | -3044 | -1657 | N |
| ATOM   | 2016 | CA  | VAL | A | 268 | -14.720 | 21.910 | 7.688  | 1.00121.92 |       |       | C |
| ANISOU | 2016 | CA  | VAL | A | 268 | 19485   | 11284  | 15556  | -2875      | -3276 | -1479 | C |
| ATOM   | 2017 | C   | VAL | A | 268 | -15.516 | 23.021 | 7.011  | 1.00141.43 |       |       | C |
| ANISOU | 2017 | C   | VAL | A | 268 | 22101   | 13458  | 18177  | -2669      | -3580 | -1382 | C |
| ATOM   | 2018 | O   | VAL | A | 268 | -16.747 | 22.987 | 6.993  | 1.00150.95 |       |       | O |
| ANISOU | 2018 | O   | VAL | A | 268 | 23040   | 14626  | 19688  | -2434      | -3738 | -1366 | O |
| ATOM   | 2019 | CB  | VAL | A | 268 | -14.962 | 20.591 | 6.935  | 1.00115.65 |       |       | C |
| ANISOU | 2019 | CB  | VAL | A | 268 | 18552   | 10698  | 14692  | -2977      | -3347 | -1419 | C |
| ATOM   | 2020 | CG1 | VAL | A | 268 | -14.715 | 20.784 | 5.450  | 1.00124.12 |       |       | C |
| ANISOU | 2020 | CG1 | VAL | A | 268 | 20008   | 11620  | 15532  | -3118      | -3579 | -1250 | C |
| ATOM   | 2021 | CG2 | VAL | A | 268 | -14.074 | 19.489 | 7.489  | 1.00103.99 |       |       | C |
| ANISOU | 2021 | CG2 | VAL | A | 268 | 16933   | 9466   | 13112  | -3182      | -3044 | -1474 | C |
| ATOM   | 2022 | N   | HIS | A | 269 | -14.809 | 24.000 | 6.452  | 1.00144.06 |       |       | N |
| ANISOU | 2022 | N   | HIS | A | 269 | 22828   | 13563  | 18347  | -2766      | -3672 | -1282 | N |
| ATOM   | 2023 | CA  | HIS | A | 269 | -15.448 | 25.186 | 5.888  | 1.00148.19 |       |       | C |
| ANISOU | 2023 | CA  | HIS | A | 269 | 23518   | 13758  | 19030  | -2582      | -3967 | -1165 | C |
| ATOM   | 2024 | C   | HIS | A | 269 | -15.442 | 25.202 | 4.359  | 1.00154.59 |       |       | C |
| ANISOU | 2024 | C   | HIS | A | 269 | 24629   | 14472  | 19635  | -2729      | -4322 | -929  | C |
| ATOM   | 2025 | O   | HIS | A | 269 | -16.470 | 25.454 | 3.730  | 1.00158.03 |       |       | O |
| ANISOU | 2025 | O   | HIS | A | 269 | 25013   | 14762  | 20270  | -2588      | -4700 | -777  | O |
| ATOM   | 2026 | CB  | HIS | A | 269 | -14.778 | 26.455 | 6.421  | 1.00142.87 |       |       | C |
| ANISOU | 2026 | CB  | HIS | A | 269 | 23124   | 12828  | 18332  | -2580      | -3847 | -1218 | C |
| ATOM   | 2027 | CG  | HIS | A | 269 | -14.713 | 26.525 | 7.917  | 1.00133.20 |       |       | C |
| ANISOU | 2027 | CG  | HIS | A | 269 | 21761   | 11644  | 17204  | -2511      | -3513 | -1455 | C |
| ATOM   | 2028 | ND1 | HIS | A | 269 | -15.692 | 27.125 | 8.676  | 1.00129.77 |       |       | N |

|        |      |     |     |   |     |         |        |        |            |       |       |   |
|--------|------|-----|-----|---|-----|---------|--------|--------|------------|-------|-------|---|
| ANISOU | 2028 | ND1 | HIS | A | 269 | 21190   | 11016  | 17101  | -2205      | -3412 | -1587 | N |
| ATOM   | 2029 | CD2 | HIS | A | 269 | -13.782 | 26.070 | 8.788  | 1.00125.02 |       |       | C |
| ANISOU | 2029 | CD2 | HIS | A | 269 | 20739   | 10788  | 15973  | -2738      | -3255 | -1564 | C |
| ATOM   | 2030 | CE1 | HIS | A | 269 | -15.369 | 27.036 | 9.955  | 1.00126.83 |       |       | C |
| ANISOU | 2030 | CE1 | HIS | A | 269 | 20833   | 10706  | 16650  | -2267      | -3081 | -1802 | C |
| ATOM   | 2031 | NE2 | HIS | A | 269 | -14.216 | 26.401 | 10.050 | 1.00125.00 |       |       | N |
| ANISOU | 2031 | NE2 | HIS | A | 269 | 20688   | 10710  | 16098  | -2603      | -3032 | -1774 | N |
| ATOM   | 2032 | N   | GLY | A | 270 | -14.280 | 24.942 | 3.768  | 1.00152.18 |       |       | N |
| ANISOU | 2032 | N   | GLY | A | 270 | 24653   | 14220  | 18949  | -3032      | -4195 | -875  | N |
| ATOM   | 2033 | CA  | GLY | A | 270 | -14.145 | 24.953 | 2.324  | 1.00156.74 |       |       | C |
| ANISOU | 2033 | CA  | GLY | A | 270 | 25647   | 14681  | 19228  | -3233      | -4444 | -673  | C |
| ATOM   | 2034 | C   | GLY | A | 270 | -13.827 | 26.334 | 1.791  | 1.00171.79 |       |       | C |
| ANISOU | 2034 | C   | GLY | A | 270 | 27953   | 16255  | 21065  | -3253      | -4625 | -517  | C |
| ATOM   | 2035 | O   | GLY | A | 270 | -12.705 | 26.819 | 1.928  | 1.00175.58 |       |       | O |
| ANISOU | 2035 | O   | GLY | A | 270 | 28650   | 16666  | 21398  | -3401      | -4378 | -521  | O |
| ATOM   | 2036 | N   | ASP | A | 271 | -14.821 | 26.970 | 1.179  | 1.00188.01 |       |       | N |
| ANISOU | 2036 | N   | ASP | A | 271 | 30082   | 18083  | 23268  | -3117      | -5088 | -344  | N |
| ATOM   | 2037 | CA  | ASP | A | 271 | -14.663 | 28.327 | 0.665  | 1.00199.07 |       |       | C |
| ANISOU | 2037 | CA  | ASP | A | 271 | 31849   | 19132  | 24656  | -3113      | -5320 | -165  | C |
| ATOM   | 2038 | C   | ASP | A | 271 | -15.733 | 29.248 | 1.244  | 1.00200.62 |       |       | C |
| ANISOU | 2038 | C   | ASP | A | 271 | 31747   | 19088  | 25393  | -2733      | -5547 | -144  | C |
| ATOM   | 2039 | O   | ASP | A | 271 | -15.729 | 30.456 | 1.000  | 1.00203.62 |       |       | O |
| ANISOU | 2039 | O   | ASP | A | 271 | 32358   | 19131  | 25878  | -2661      | -5734 | -8    | O |
| ATOM   | 2040 | CB  | ASP | A | 271 | -14.720 | 28.337 | -0.864 | 1.00202.76 |       |       | C |
| ANISOU | 2040 | CB  | ASP | A | 271 | 32822   | 19460  | 24755  | -3376      | -5701 | 106   | C |
| ATOM   | 2041 | CG  | ASP | A | 271 | -13.565 | 27.582 | -1.494 | 1.00200.45 |       |       | C |
| ANISOU | 2041 | CG  | ASP | A | 271 | 32920   | 19311  | 23930  | -3751      | -5352 | 78    | C |
| ATOM   | 2042 | OD1 | ASP | A | 271 | -12.444 | 27.637 | -0.942 | 1.00197.13 |       |       | O |
| ANISOU | 2042 | OD1 | ASP | A | 271 | 32482   | 18960  | 23457  | -3826      | -4886 | -44   | O |
| ATOM   | 2043 | OD2 | ASP | A | 271 | -13.775 | 26.932 | -2.539 | 1.00201.34 |       |       | O |
| ANISOU | 2043 | OD2 | ASP | A | 271 | 33367   | 19436  | 23697  | -3987      | -5537 | 190   | O |
| ATOM   | 2044 | N   | ASP | A | 272 | -16.648 | 28.666 | 2.011  | 1.00195.28 |       |       | N |
| ANISOU | 2044 | N   | ASP | A | 272 | 30550   | 18556  | 25091  | -2486      | -5490 | -270  | N |
| ATOM   | 2045 | CA  | ASP | A | 272 | -17.696 | 29.430 | 2.676  | 1.00193.09 |       |       | C |
| ANISOU | 2045 | CA  | ASP | A | 272 | 29919   | 18033  | 25413  | -2090      | -5562 | -274  | C |
| ATOM   | 2046 | C   | ASP | A | 272 | -17.309 | 29.679 | 4.129  | 1.00181.13 |       |       | C |
| ANISOU | 2046 | C   | ASP | A | 272 | 28260   | 16546  | 24014  | -1945      | -5024 | -597  | C |
| ATOM   | 2047 | O   | ASP | A | 272 | -17.644 | 28.893 | 5.016  | 1.00183.07 |       |       | O |
| ANISOU | 2047 | O   | ASP | A | 272 | 28137   | 17025  | 24395  | -1846      | -4738 | -795  | O |
| ATOM   | 2048 | CB  | ASP | A | 272 | -19.030 | 28.687 | 2.599  | 1.00201.13 |       |       | C |
| ANISOU | 2048 | CB  | ASP | A | 272 | 30442   | 19141  | 26838  | -1911      | -5816 | -175  | C |
| ATOM   | 2049 | CG  | ASP | A | 272 | -20.182 | 29.495 | 3.162  | 1.00210.98 |       |       | C |
| ANISOU | 2049 | CG  | ASP | A | 272 | 31270   | 20069  | 28822  | -1477      | -5865 | -119  | C |
| ATOM   | 2050 | OD1 | ASP | A | 272 | -20.105 | 30.742 | 3.137  | 1.00214.49 |       |       | O |
| ANISOU | 2050 | OD1 | ASP | A | 272 | 31913   | 20139  | 29443  | -1340      | -5914 | -48   | O |
| ATOM   | 2051 | OD2 | ASP | A | 272 | -21.168 | 28.884 | 3.625  | 1.00214.19 |       |       | O |
| ANISOU | 2051 | OD2 | ASP | A | 272 | 31139   | 20572  | 29671  | -1269      | -5825 | -136  | O |
| ATOM   | 2052 | N   | LEU | A | 273 | -16.600 | 30.778 | 4.364  | 1.00164.64 |       |       | N |
| ANISOU | 2052 | N   | LEU | A | 273 | 26514   | 14202  | 21841  | -1971      | -4909 | -638  | N |
| ATOM   | 2053 | CA  | LEU | A | 273 | -16.104 | 31.104 | 5.695  | 1.00150.14 |       |       | C |
| ANISOU | 2053 | CA  | LEU | A | 273 | 24696   | 12342  | 20008  | -1929      | -4455 | -930  | C |
| ATOM   | 2054 | C   | LEU | A | 273 | -17.056 | 32.052 | 6.417  | 1.00159.05 |       |       | C |
| ANISOU | 2054 | C   | LEU | A | 273 | 25680   | 13095  | 21658  | -1538      | -4339 | -1025 | C |
| ATOM   | 2055 | O   | LEU | A | 273 | -16.623 | 32.977 | 7.104  | 1.00150.20 |       |       | O |
| ANISOU | 2055 | O   | LEU | A | 273 | 24838   | 11709  | 20523  | -1518      | -4113 | -1178 | O |
| ATOM   | 2056 | CB  | LEU | A | 273 | -14.716 | 31.736 | 5.590  | 1.00143.32 |       |       | C |
| ANISOU | 2056 | CB  | LEU | A | 273 | 24311   | 11391  | 18754  | -2232      | -4389 | -919  | C |
| ATOM   | 2057 | CG  | LEU | A | 273 | -13.748 | 31.035 | 4.634  | 1.00134.73 |       |       | C |
| ANISOU | 2057 | CG  | LEU | A | 273 | 23416   | 10548  | 17228  | -2599      | -4471 | -760  | C |
| ATOM   | 2058 | CD1 | LEU | A | 273 | -12.435 | 31.793 | 4.539  | 1.00133.07 |       |       | C |
| ANISOU | 2058 | CD1 | LEU | A | 273 | 23619   | 10188  | 16755  | -2873      | -4390 | -702  | C |
| ATOM   | 2059 | CD2 | LEU | A | 273 | -13.505 | 29.602 | 5.064  | 1.00123.11 |       |       | C |
| ANISOU | 2059 | CD2 | LEU | A | 273 | 21653   | 9504   | 15618  | -2725      | -4226 | -891  | C |
| ATOM   | 2060 | N   | SER | A | 274 | -18.354 | 31.814 | 6.257  | 1.00176.40 |       |       | N |
| ANISOU | 2060 | N   | SER | A | 274 | 27442   | 15235  | 24346  | -1237      | -4480 | -922  | N |
| ATOM   | 2061 | CA  | SER | A | 274 | -19.372 | 32.670 | 6.856  | 1.00186.50 |       |       | C |
| ANISOU | 2061 | CA  | SER | A | 274 | 28500   | 16105  | 26256  | -815       | -4318 | -970  | C |
| ATOM   | 2062 | C   | SER | A | 274 | -19.455 | 32.481 | 8.367  | 1.00192.03 |       |       | C |
| ANISOU | 2062 | C   | SER | A | 274 | 29100   | 16849  | 27012  | -699       | -3688 | -1353 | C |
| ATOM   | 2063 | O   | SER | A | 274 | -19.884 | 33.379 | 9.091  | 1.00197.04 |       |       | O |

|        |      |     |     |   |     |         |        |        |            |       |       |   |
|--------|------|-----|-----|---|-----|---------|--------|--------|------------|-------|-------|---|
| ANISOU | 2063 | O   | SER | A | 274 | 29786   | 17082  | 27997  | -428       | -3364 | -1502 | O |
| ATOM   | 2064 | CB  | SER | A | 274 | -20.738 | 32.413 | 6.213  | 1.00185.20 |       |       | C |
| ANISOU | 2064 | CB  | SER | A | 274 | 27816   | 15856  | 26695  | -545       | -4677 | -680  | C |
| ATOM   | 2065 | OG  | SER | A | 274 | -21.147 | 31.068 | 6.393  | 1.00176.42 |       |       | O |
| ANISOU | 2065 | OG  | SER | A | 274 | 26301   | 15158  | 25574  | -593       | -4621 | -726  | O |
| ATOM   | 2066 | N   | GLY | A | 275 | -19.046 | 31.307 | 8.838  | 1.00189.63 |       |       | N |
| ANISOU | 2066 | N   | GLY | A | 275 | 28696   | 17002  | 26355  | -918       | -3501 | -1507 | N |
| ATOM   | 2067 | CA  | GLY | A | 275 | -19.049 | 31.014 | 10.259 | 1.00186.04 |       |       | C |
| ANISOU | 2067 | CA  | GLY | A | 275 | 28216   | 16625  | 25846  | -892       | -2943 | -1848 | C |
| ATOM   | 2068 | C   | GLY | A | 275 | -17.642 | 30.791 | 10.773 | 1.00174.24 |       |       | C |
| ANISOU | 2068 | C   | GLY | A | 275 | 27144   | 15351  | 23708  | -1313      | -2822 | -2004 | C |
| ATOM   | 2069 | O   | GLY | A | 275 | -17.439 | 30.297 | 11.882 | 1.00177.74 |       |       | O |
| ANISOU | 2069 | O   | GLY | A | 275 | 27616   | 15955  | 23960  | -1424      | -2460 | -2242 | O |
| ATOM   | 2070 | N   | PHE | A | 276 | -16.666 | 31.163 | 9.952  | 1.00156.63 |       |       | N |
| ANISOU | 2070 | N   | PHE | A | 276 | 25237   | 13106  | 21168  | -1568      | -3140 | -1834 | N |
| ATOM   | 2071 | CA  | PHE | A | 276 | -15.262 | 30.963 | 10.278 | 1.00141.52 |       |       | C |
| ANISOU | 2071 | CA  | PHE | A | 276 | 23650   | 11378  | 18743  | -1986      | -3091 | -1889 | C |
| ATOM   | 2072 | C   | PHE | A | 276 | -14.640 | 32.224 | 10.862 | 1.00147.37 |       |       | C |
| ANISOU | 2072 | C   | PHE | A | 276 | 24897   | 11736  | 19361  | -2083      | -2985 | -2006 | C |
| ATOM   | 2073 | O   | PHE | A | 276 | -13.872 | 32.162 | 11.822 | 1.00152.37 |       |       | O |
| ANISOU | 2073 | O   | PHE | A | 276 | 25775   | 12425  | 19694  | -2355      | -2800 | -2165 | O |
| ATOM   | 2074 | CB  | PHE | A | 276 | -14.493 | 30.523 | 9.031  | 1.00133.15 |       |       | C |
| ANISOU | 2074 | CB  | PHE | A | 276 | 22629   | 10526  | 17437  | -2239      | -3424 | -1622 | C |
| ATOM   | 2075 | CG  | PHE | A | 276 | -13.002 | 30.503 | 9.210  | 1.00134.34 |       |       | C |
| ANISOU | 2075 | CG  | PHE | A | 276 | 23068   | 10775  | 17199  | -2648      | -3385 | -1597 | C |
| ATOM   | 2076 | CD1 | PHE | A | 276 | -12.379 | 29.435 | 9.832  | 1.00130.05 |       |       | C |
| ANISOU | 2076 | CD1 | PHE | A | 276 | 22368   | 10580  | 16464  | -2888      | -3219 | -1660 | C |
| ATOM   | 2077 | CD2 | PHE | A | 276 | -12.222 | 31.546 | 8.743  | 1.00144.89 |       |       | C |
| ANISOU | 2077 | CD2 | PHE | A | 276 | 24797   | 11837  | 18418  | -2801      | -3534 | -1470 | C |
| ATOM   | 2078 | CE1 | PHE | A | 276 | -11.007 | 29.413 | 9.993  | 1.00129.48 |       |       | C |
| ANISOU | 2078 | CE1 | PHE | A | 276 | 22481   | 10567  | 16146  | -3266      | -3215 | -1571 | C |
| ATOM   | 2079 | CE2 | PHE | A | 276 | -10.851 | 31.529 | 8.903  | 1.00143.73 |       |       | C |
| ANISOU | 2079 | CE2 | PHE | A | 276 | 24848   | 11761  | 18003  | -3187      | -3508 | -1397 | C |
| ATOM   | 2080 | CZ  | PHE | A | 276 | -10.243 | 30.461 | 9.528  | 1.00133.78 |       |       | C |
| ANISOU | 2080 | CZ  | PHE | A | 276 | 23384   | 10837  | 16611  | -3417      | -3356 | -1435 | C |
| ATOM   | 2081 | N   | TYR | A | 277 | -14.979 | 33.370 | 10.282 | 1.00151.65 |       |       | N |
| ANISOU | 2081 | N   | TYR | A | 277 | 25614   | 11866  | 20139  | -1885      | -3142 | -1905 | N |
| ATOM   | 2082 | CA  | TYR | A | 277 | -14.412 | 34.643 | 10.714 | 1.00158.61 |       |       | C |
| ANISOU | 2082 | CA  | TYR | A | 277 | 27013   | 12330  | 20922  | -1977      | -3076 | -2000 | C |
| ATOM   | 2083 | C   | TYR | A | 277 | -15.090 | 35.188 | 11.966 | 1.00165.90 |       |       | C |
| ANISOU | 2083 | C   | TYR | A | 277 | 28084   | 12921  | 22027  | -1756      | -2632 | -2327 | C |
| ATOM   | 2084 | O   | TYR | A | 277 | -14.846 | 36.325 | 12.371 | 1.00155.94 |       |       | O |
| ANISOU | 2084 | O   | TYR | A | 277 | 27289   | 11220  | 20741  | -1776      | -2529 | -2446 | O |
| ATOM   | 2085 | CB  | TYR | A | 277 | -14.460 | 35.664 | 9.576  | 1.00164.95 |       |       | C |
| ANISOU | 2085 | CB  | TYR | A | 277 | 27978   | 12793  | 21902  | -1871      | -3419 | -1745 | C |
| ATOM   | 2086 | CG  | TYR | A | 277 | -13.493 | 35.346 | 8.461  | 1.00164.33 |       |       | C |
| ANISOU | 2086 | CG  | TYR | A | 277 | 27979   | 12953  | 21506  | -2197      | -3763 | -1460 | C |
| ATOM   | 2087 | CD1 | TYR | A | 277 | -12.178 | 35.002 | 8.740  | 1.00157.50 |       |       | C |
| ANISOU | 2087 | CD1 | TYR | A | 277 | 27299   | 12309  | 20234  | -2622      | -3715 | -1464 | C |
| ATOM   | 2088 | CD2 | TYR | A | 277 | -13.896 | 35.371 | 7.132  | 1.00167.22 |       |       | C |
| ANISOU | 2088 | CD2 | TYR | A | 277 | 28244   | 13298  | 21996  | -2101      | -4121 | -1165 | C |
| ATOM   | 2089 | CE1 | TYR | A | 277 | -11.286 | 34.705 | 7.729  | 1.00152.64 |       |       | C |
| ANISOU | 2089 | CE1 | TYR | A | 277 | 26739   | 11870  | 19388  | -2903      | -3918 | -1203 | C |
| ATOM   | 2090 | CE2 | TYR | A | 277 | -13.011 | 35.073 | 6.112  | 1.00160.78 |       |       | C |
| ANISOU | 2090 | CE2 | TYR | A | 277 | 27582   | 12664  | 20842  | -2419      | -4343 | -928  | C |
| ATOM   | 2091 | CZ  | TYR | A | 277 | -11.707 | 34.740 | 6.417  | 1.00149.51 |       |       | C |
| ANISOU | 2091 | CZ  | TYR | A | 277 | 26309   | 11439  | 19057  | -2799      | -4191 | -959  | C |
| ATOM   | 2092 | OH  | TYR | A | 277 | -10.818 | 34.442 | 5.411  | 1.00135.94 |       |       | O |
| ANISOU | 2092 | OH  | TYR | A | 277 | 24727   | 9861   | 17063  | -3097      | -4304 | -723  | O |
| ATOM   | 2093 | N   | GLN | A | 278 | -15.943 | 34.368 | 12.571 | 1.00183.93 |       |       | N |
| ANISOU | 2093 | N   | GLN | A | 278 | 30003   | 15394  | 24488  | -1560      | -2334 | -2477 | N |
| ATOM   | 2094 | CA  | GLN | A | 278 | -16.546 | 34.693 | 13.856 | 1.00201.31 |       |       | C |
| ANISOU | 2094 | CA  | GLN | A | 278 | 32374   | 17318  | 26794  | -1396      | -1793 | -2818 | C |
| ATOM   | 2095 | C   | GLN | A | 278 | -15.728 | 34.046 | 14.962 | 1.00196.74 |       |       | C |
| ANISOU | 2095 | C   | GLN | A | 278 | 32078   | 17012  | 25662  | -1819      | -1604 | -3023 | C |
| ATOM   | 2096 | O   | GLN | A | 278 | -15.402 | 34.685 | 15.959 | 1.00203.73 |       |       | O |
| ANISOU | 2096 | O   | GLN | A | 278 | 33519   | 17603  | 26287  | -1988      | -1335 | -3274 | O |
| ATOM   | 2097 | CB  | GLN | A | 278 | -17.994 | 34.203 | 13.922 | 1.00214.17 |       |       | C |
| ANISOU | 2097 | CB  | GLN | A | 278 | 33429   | 18955  | 28990  | -942       | -1528 | -2839 | C |
| ATOM   | 2098 | CG  | GLN | A | 278 | -18.975 | 35.015 | 13.090 | 1.00229.24 |       |       | C |

|        |      |     |     |   |     |         |        |        |            |       |       |   |
|--------|------|-----|-----|---|-----|---------|--------|--------|------------|-------|-------|---|
| ANISOU | 2098 | CG  | GLN | A | 278 | 35066   | 20455  | 31578  | -489       | -1663 | -2638 | C |
| ATOM   | 2099 | CD  | GLN | A | 278 | -18.777 | 34.830 | 11.599 | 1.00235.45 |       |       | C |
| ANISOU | 2099 | CD  | GLN | A | 278 | 35622   | 21436  | 32401  | -552       | -2328 | -2236 | C |
| ATOM   | 2100 | OE1 | GLN | A | 278 | -18.048 | 33.938 | 11.162 | 1.00231.05 |       |       | O |
| ANISOU | 2100 | OE1 | GLN | A | 278 | 35025   | 21346  | 31418  | -879       | -2604 | -2127 | O |
| ATOM   | 2101 | NE2 | GLN | A | 278 | -19.425 | 35.676 | 10.807 | 1.00244.42 |       |       | N |
| ANISOU | 2101 | NE2 | GLN | A | 278 | 36637   | 22179  | 34050  | -251       | -2572 | -2002 | N |
| ATOM   | 2102 | N   | GLU | A | 279 | -15.395 | 32.773 | 14.772 | 1.00181.45 |       |       | N |
| ANISOU | 2102 | N   | GLU | A | 279 | 29788   | 15612  | 23544  | -2013      | -1770 | -2899 | N |
| ATOM   | 2103 | CA  | GLU | A | 279 | -14.565 | 32.048 | 15.725 | 1.00172.07 |       |       | C |
| ANISOU | 2103 | CA  | GLU | A | 279 | 28791   | 14710  | 21878  | -2441      | -1689 | -3006 | C |
| ATOM   | 2104 | C   | GLU | A | 279 | -13.128 | 32.556 | 15.670 | 1.00174.66 |       |       | C |
| ANISOU | 2104 | C   | GLU | A | 279 | 29565   | 14978  | 21820  | -2899      | -2002 | -2890 | C |
| ATOM   | 2105 | O   | GLU | A | 279 | -12.547 | 32.915 | 16.694 | 1.00190.04 |       |       | O |
| ANISOU | 2105 | O   | GLU | A | 279 | 32016   | 16768  | 23423  | -3224      | -1904 | -3048 | O |
| ATOM   | 2106 | CB  | GLU | A | 279 | -14.609 | 30.546 | 15.442 | 1.00158.41 |       |       | C |
| ANISOU | 2106 | CB  | GLU | A | 279 | 26514   | 13530  | 20146  | -2495      | -1792 | -2868 | C |
| ATOM   | 2107 | CG  | GLU | A | 279 | -16.014 | 29.970 | 15.389 | 1.00163.05 |       |       | C |
| ANISOU | 2107 | CG  | GLU | A | 279 | 26591   | 14200  | 21159  | -2074      | -1556 | -2923 | C |
| ATOM   | 2108 | CD  | GLU | A | 279 | -16.790 | 30.199 | 16.673 | 1.00177.97 |       |       | C |
| ANISOU | 2108 | CD  | GLU | A | 279 | 28656   | 15858  | 23109  | -1925      | -995  | -3244 | C |
| ATOM   | 2109 | OE1 | GLU | A | 279 | -16.191 | 30.082 | 17.762 | 1.00180.06 |       |       | O |
| ANISOU | 2109 | OE1 | GLU | A | 279 | 29340   | 16147  | 22927  | -2266      | -811  | -3423 | O |
| ATOM   | 2110 | OE2 | GLU | A | 279 | -17.999 | 30.500 | 16.592 | 1.00189.18 |       |       | O |
| ANISOU | 2110 | OE2 | GLU | A | 279 | 29803   | 17040  | 25035  | -1483      | -731  | -3298 | O |
| ATOM   | 2111 | N   | ILE | A | 280 | -12.562 | 32.587 | 14.467 | 1.00157.03 |       |       | N |
| ANISOU | 2111 | N   | ILE | A | 280 | 27169   | 12850  | 19644  | -2955      | -2378 | -2596 | N |
| ATOM   | 2112 | CA  | ILE | A | 280 | -11.219 | 33.122 | 14.271 | 1.00145.15 |       |       | C |
| ANISOU | 2112 | CA  | ILE | A | 280 | 26012   | 11259  | 17879  | -3363      | -2661 | -2431 | C |
| ATOM   | 2113 | C   | ILE | A | 280 | -11.256 | 34.401 | 13.446 | 1.00149.89 |       |       | C |
| ANISOU | 2113 | C   | ILE | A | 280 | 26859   | 11447  | 18644  | -3209      | -2822 | -2335 | C |
| ATOM   | 2114 | O   | ILE | A | 280 | -11.539 | 34.373 | 12.248 | 1.00137.49 |       |       | O |
| ANISOU | 2114 | O   | ILE | A | 280 | 25029   | 9927   | 17284  | -3009      | -3010 | -2126 | O |
| ATOM   | 2115 | CB  | ILE | A | 280 | -10.294 | 32.116 | 13.572 | 1.00134.57 |       |       | C |
| ANISOU | 2115 | CB  | ILE | A | 280 | 24334   | 10346  | 16452  | -3629      | -2903 | -2139 | C |
| ATOM   | 2116 | CG1 | ILE | A | 280 | -10.206 | 30.820 | 14.379 | 1.00135.07 |       |       | C |
| ANISOU | 2116 | CG1 | ILE | A | 280 | 24132   | 10801  | 16389  | -3794      | -2777 | -2196 | C |
| ATOM   | 2117 | CG2 | ILE | A | 280 | -8.912  | 32.719 | 13.387 | 1.00134.02 |       |       | C |
| ANISOU | 2117 | CG2 | ILE | A | 280 | 24565   | 10145  | 16211  | -4043      | -3153 | -1931 | C |
| ATOM   | 2118 | CD1 | ILE | A | 280 | -9.502  | 30.977 | 15.709 | 1.00141.48 |       |       | C |
| ANISOU | 2118 | CD1 | ILE | A | 280 | 25337   | 11528  | 16890  | -4202      | -2757 | -2299 | C |
| ATOM   | 2119 | N   | ASP | A | 281 | -10.962 | 35.520 | 14.100 | 1.00164.38 |       |       | N |
| ANISOU | 2119 | N   | ASP | A | 281 | 29249   | 12853  | 20355  | -3338      | -2765 | -2481 | N |
| ATOM   | 2120 | CA  | ASP | A | 281 | -10.996 | 36.825 | 13.455 | 1.00169.00 |       |       | C |
| ANISOU | 2120 | CA  | ASP | A | 281 | 30126   | 12982  | 21103  | -3203      | -2898 | -2408 | C |
| ATOM   | 2121 | C   | ASP | A | 281 | -9.996  | 36.909 | 12.304 | 1.00158.19 |       |       | C |
| ANISOU | 2121 | C   | ASP | A | 281 | 28703   | 11730  | 19672  | -3442      | -3285 | -2046 | C |
| ATOM   | 2122 | O   | ASP | A | 281 | -8.858  | 36.457 | 12.422 | 1.00156.06 |       |       | O |
| ANISOU | 2122 | O   | ASP | A | 281 | 28441   | 11693  | 19160  | -3867      | -3425 | -1901 | O |
| ATOM   | 2123 | CB  | ASP | A | 281 | -10.720 | 37.924 | 14.482 | 1.00186.22 |       |       | C |
| ANISOU | 2123 | CB  | ASP | A | 281 | 32985   | 14675  | 23094  | -3384      | -2753 | -2653 | C |
| ATOM   | 2124 | CG  | ASP | A | 281 | -10.838 | 39.313 | 13.895 | 1.00207.48 |       |       | C |
| ANISOU | 2124 | CG  | ASP | A | 281 | 35998   | 16839  | 25997  | -3215      | -2854 | -2600 | C |
| ATOM   | 2125 | OD1 | ASP | A | 281 | -11.561 | 39.477 | 12.889 | 1.00213.11 |       |       | O |
| ANISOU | 2125 | OD1 | ASP | A | 281 | 36387   | 17495  | 27090  | -2824      | -2938 | -2443 | O |
| ATOM   | 2126 | OD2 | ASP | A | 281 | -10.211 | 40.243 | 14.444 | 1.00217.08 |       |       | O |
| ANISOU | 2126 | OD2 | ASP | A | 281 | 37810   | 17674  | 26997  | -3498      | -2884 | -2696 | O |
| ATOM   | 2127 | N   | GLU | A | 282 | -10.438 | 37.484 | 11.191 | 1.00154.87 |       |       | N |
| ANISOU | 2127 | N   | GLU | A | 282 | 28221   | 11122  | 19501  | -3175      | -3445 | -1876 | N |
| ATOM   | 2128 | CA  | GLU | A | 282 | -9.600  | 37.627 | 10.006 | 1.00154.26 |       |       | C |
| ANISOU | 2128 | CA  | GLU | A | 282 | 28154   | 11108  | 19351  | -3382      | -3753 | -1534 | C |
| ATOM   | 2129 | C   | GLU | A | 282 | -8.427  | 38.565 | 10.265 | 1.00158.20 |       |       | C |
| ANISOU | 2129 | C   | GLU | A | 282 | 29125   | 11325  | 19660  | -3776      | -3879 | -1462 | C |
| ATOM   | 2130 | O   | GLU | A | 282 | -7.323  | 38.352 | 9.762  | 1.00137.63 |       |       | O |
| ANISOU | 2130 | O   | GLU | A | 282 | 26494   | 8882   | 16916  | -4126      | -4034 | -1204 | O |
| ATOM   | 2131 | CB  | GLU | A | 282 | -10.433 | 38.160 | 8.840  | 1.00160.24 |       |       | C |
| ANISOU | 2131 | CB  | GLU | A | 282 | 28842   | 11653  | 20389  | -3031      | -3932 | -1365 | C |
| ATOM   | 2132 | CG  | GLU | A | 282 | -9.630  | 38.461 | 7.588  | 1.00167.27 |       |       | C |
| ANISOU | 2132 | CG  | GLU | A | 282 | 29868   | 12530  | 21155  | -3256      | -4217 | -1019 | C |
| ATOM   | 2133 | CD  | GLU | A | 282 | -10.445 | 39.180 | 6.533  | 1.00181.33 |       |       | C |



|        |      |     |     |   |     |         |        |        |            |       |       |   |
|--------|------|-----|-----|---|-----|---------|--------|--------|------------|-------|-------|---|
| ANISOU | 2133 | CD  | GLU | A | 282 | 31700   | 14013  | 23182  | -2962      | -4461 | -832  | C |
| ATOM   | 2134 | OE1 | GLU | A | 282 | -11.600 | 39.555 | 6.826  | 1.00183.73 |       |       | O |
| ANISOU | 2134 | OE1 | GLU | A | 282 | 31902   | 14070  | 23839  | -2565      | -4414 | -957  | O |
| ATOM   | 2135 | OE2 | GLU | A | 282 | -9.929  | 39.370 | 5.412  | 1.00191.28 |       |       | O |
| ANISOU | 2135 | OE2 | GLU | A | 282 | 33105   | 15264  | 24308  | -3138      | -4691 | -537  | O |
| ATOM   | 2136 | N   | ASN | A | 283 | -8.683  | 39.600 | 11.059 | 1.00160.33 |       |       | N |
| ANISOU | 2136 | N   | ASN | A | 283 | 29828   | 11140  | 19951  | -3724      | -3783 | -1688 | N |
| ATOM   | 2137 | CA  | ASN | A | 283 | -7.704  | 40.642 | 11.348 | 1.00158.92 |       |       | C |
| ANISOU | 2137 | CA  | ASN | A | 283 | 30148   | 10626  | 19609  | -4083      | -3926 | -1636 | C |
| ATOM   | 2138 | C   | ASN | A | 283 | -6.398  | 40.117 | 11.945 | 1.00155.33 |       |       | C |
| ANISOU | 2138 | C   | ASN | A | 283 | 29557   | 10596  | 18864  | -4558      | -3975 | -1495 | C |
| ATOM   | 2139 | O   | ASN | A | 283 | -5.339  | 40.719 | 11.764 | 1.00152.53 |       |       | O |
| ANISOU | 2139 | O   | ASN | A | 283 | 29282   | 10248  | 18427  | -4841      | -4139 | -1252 | O |
| ATOM   | 2140 | CB  | ASN | A | 283 | -8.320  | 41.692 | 12.276 | 1.00173.11 |       |       | C |
| ANISOU | 2140 | CB  | ASN | A | 283 | 32362   | 11966  | 21446  | -3895      | -3691 | -1953 | C |
| ATOM   | 2141 | CG  | ASN | A | 283 | -7.380  | 42.848 | 12.558 | 1.00196.67 |       |       | C |
| ANISOU | 2141 | CG  | ASN | A | 283 | 35678   | 14792  | 24255  | -4171      | -3784 | -1859 | C |
| ATOM   | 2142 | OD1 | ASN | A | 283 | -6.587  | 43.242 | 11.702 | 1.00213.35 |       |       | O |
| ANISOU | 2142 | OD1 | ASN | A | 283 | 37746   | 16946  | 26371  | -4343      | -4047 | -1535 | O |
| ATOM   | 2143 | ND2 | ASN | A | 283 | -7.464  | 43.399 | 13.764 | 1.00196.79 |       |       | N |
| ANISOU | 2143 | ND2 | ASN | A | 283 | 36059   | 14611  | 24100  | -4232      | -3555 | -2140 | N |
| ATOM   | 2144 | N   | ILE | A | 284 | -6.475  | 38.995 | 12.653 | 1.00155.48 |       |       | N |
| ANISOU | 2144 | N   | ILE | A | 284 | 29353   | 10947  | 18777  | -4643      | -3855 | -1615 | N |
| ATOM   | 2145 | CA  | ILE | A | 284 | -5.297  | 38.422 | 13.294 | 1.00151.98 |       |       | C |
| ANISOU | 2145 | CA  | ILE | A | 284 | 28739   | 10877  | 18131  | -5077      | -3941 | -1441 | C |
| ATOM   | 2146 | C   | ILE | A | 284 | -4.681  | 37.298 | 12.464 | 1.00153.68 |       |       | C |
| ANISOU | 2146 | C   | ILE | A | 284 | 28468   | 11472  | 18453  | -5215      | -4035 | -1142 | C |
| ATOM   | 2147 | O   | ILE | A | 284 | -3.701  | 36.682 | 12.877 | 1.00152.01 |       |       | O |
| ANISOU | 2147 | O   | ILE | A | 284 | 28010   | 11556  | 18189  | -5544      | -4107 | -942  | O |
| ATOM   | 2148 | CB  | ILE | A | 284 | -5.620  | 37.890 | 14.705 | 1.00143.96 |       |       | C |
| ANISOU | 2148 | CB  | ILE | A | 284 | 27808   | 9988   | 16901  | -5153      | -3762 | -1711 | C |
| ATOM   | 2149 | CG1 | ILE | A | 284 | -6.424  | 36.593 | 14.623 | 1.00137.05 |       |       | C |
| ANISOU | 2149 | CG1 | ILE | A | 284 | 26598   | 9358   | 16119  | -4959      | -3612 | -1846 | C |
| ATOM   | 2150 | CG2 | ILE | A | 284 | -6.373  | 38.934 | 15.509 | 1.00145.46 |       |       | C |
| ANISOU | 2150 | CG2 | ILE | A | 284 | 28525   | 9752   | 16990  | -4981      | -3542 | -2060 | C |
| ATOM   | 2151 | CD1 | ILE | A | 284 | -6.788  | 36.020 | 15.972 | 1.00137.67 |       |       | C |
| ANISOU | 2151 | CD1 | ILE | A | 284 | 26770   | 9565   | 15975  | -5038      | -3407 | -2103 | C |
| ATOM   | 2152 | N   | LEU | A | 285 | -5.254  | 37.042 | 11.291 | 1.00157.02 |       |       | N |
| ANISOU | 2152 | N   | LEU | A | 285 | 28770   | 11849  | 19042  | -4970      | -4036 | -1094 | N |
| ATOM   | 2153 | CA  | LEU | A | 285 | -4.807  | 35.940 | 10.441 | 1.00152.26 |       |       | C |
| ANISOU | 2153 | CA  | LEU | A | 285 | 27721   | 11616  | 18514  | -5041      | -4019 | -846  | C |
| ATOM   | 2154 | C   | LEU | A | 285 | -3.801  | 36.382 | 9.383  | 1.00148.07 |       |       | C |
| ANISOU | 2154 | C   | LEU | A | 285 | 27236   | 10980  | 18042  | -5269      | -4133 | -492  | C |
| ATOM   | 2155 | O   | LEU | A | 285 | -3.933  | 37.462 | 8.809  | 1.00141.38 |       |       | O |
| ANISOU | 2155 | O   | LEU | A | 285 | 26687   | 9826   | 17206  | -5171      | -4228 | -441  | O |
| ATOM   | 2156 | CB  | LEU | A | 285 | -6.007  | 35.264 | 9.774  | 1.00148.10 |       |       | C |
| ANISOU | 2156 | CB  | LEU | A | 285 | 26897   | 11301  | 18071  | -4590      | -3881 | -950  | C |
| ATOM   | 2157 | CG  | LEU | A | 285 | -6.868  | 34.392 | 10.688 | 1.00147.42 |       |       | C |
| ANISOU | 2157 | CG  | LEU | A | 285 | 26579   | 11453  | 17980  | -4399      | -3702 | -1224 | C |
| ATOM   | 2158 | CD1 | LEU | A | 285 | -8.116  | 33.923 | 9.959  | 1.00142.00 |       |       | C |
| ANISOU | 2158 | CD1 | LEU | A | 285 | 25616   | 10895  | 17442  | -3958      | -3633 | -1288 | C |
| ATOM   | 2159 | CD2 | LEU | A | 285 | -6.058  | 33.207 | 11.192 | 1.00148.92 |       |       | C |
| ANISOU | 2159 | CD2 | LEU | A | 285 | 26461   | 12014  | 18109  | -4711      | -3657 | -1126 | C |
| ATOM   | 2160 | N   | PRO | A | 286 | -2.786  | 35.540 | 9.123  | 1.00152.11 |       |       | N |
| ANISOU | 2160 | N   | PRO | A | 286 | 27401   | 11768  | 18625  | -5542      | -4071 | -225  | N |
| ATOM   | 2161 | CA  | PRO | A | 286 | -1.781  | 35.798 | 8.087  | 1.00155.36 |       |       | C |
| ANISOU | 2161 | CA  | PRO | A | 286 | 27764   | 12136  | 19131  | -5737      | -4047 | 133   | C |
| ATOM   | 2162 | C   | PRO | A | 286 | -2.405  | 35.810 | 6.693  | 1.00154.91 |       |       | C |
| ANISOU | 2162 | C   | PRO | A | 286 | 27810   | 12026  | 19022  | -5487      | -3969 | 173   | C |
| ATOM   | 2163 | O   | PRO | A | 286 | -3.575  | 35.461 | 6.543  | 1.00150.78 |       |       | O |
| ANISOU | 2163 | O   | PRO | A | 286 | 27239   | 11615  | 18436  | -5129      | -3946 | -38   | O |
| ATOM   | 2164 | CB  | PRO | A | 286 | -0.827  | 34.602 | 8.216  | 1.00128.50 |       |       | C |
| ANISOU | 2164 | CB  | PRO | A | 286 | 23881   | 9047   | 15896  | -5993      | -3896 | 353   | C |
| ATOM   | 2165 | CG  | PRO | A | 286 | -1.051  | 34.071 | 9.585  | 1.00127.48 |       |       | C |
| ANISOU | 2165 | CG  | PRO | A | 286 | 23602   | 9110   | 15725  | -6021      | -3963 | 164   | C |
| ATOM   | 2166 | CD  | PRO | A | 286 | -2.499  | 34.303 | 9.868  | 1.00127.11 |       |       | C |
| ANISOU | 2166 | CD  | PRO | A | 286 | 23854   | 8944   | 15499  | -5686      | -3986 | -232  | C |
| ATOM   | 2167 | N   | SER | A | 287 | -1.631  | 36.201 | 5.687  | 1.00157.77 |       |       | N |
| ANISOU | 2167 | N   | SER | A | 287 | 28285   | 12251  | 19407  | -5671      | -3923 | 468   | N |
| ATOM   | 2168 | CA  | SER | A | 287 | -2.122  | 36.239 | 4.315  | 1.00159.02 |       |       | C |

|        |      |     |     |   |     |        |        |       |            |       |      |   |
|--------|------|-----|-----|---|-----|--------|--------|-------|------------|-------|------|---|
| ANISOU | 2168 | CA  | SER | A | 287 | 28604  | 12381  | 19436 | -5487      | -3859 | 549  | C |
| ATOM   | 2169 | C   | SER | A | 287 | -2.323 | 34.822 | 3.786 | 1.00156.83 |       |      | C |
| ANISOU | 2169 | C   | SER | A | 287 | 28013  | 12467  | 19110 | -5399      | -3594 | 537  | C |
| ATOM   | 2170 | O   | SER | A | 287 | -3.121 | 34.597 | 2.882 | 1.00156.30 |       |      | O |
| ANISOU | 2170 | O   | SER | A | 287 | 28073  | 12439  | 18878 | -5196      | -3603 | 504  | O |
| ATOM   | 2171 | CB  | SER | A | 287 | -1.139 | 36.993 | 3.418 | 1.00163.95 |       |      | C |
| ANISOU | 2171 | CB  | SER | A | 287 | 29478  | 12752  | 20064 | -5766      | -3817 | 879  | C |
| ATOM   | 2172 | OG  | SER | A | 287 | 0.022  | 36.214 | 3.173 | 1.00162.79 |       |      | O |
| ANISOU | 2172 | OG  | SER | A | 287 | 29031  | 12763  | 20060 | -6055      | -3498 | 1122 | O |
| ATOM   | 2173 | N   | ASP | A | 288 | -1.588 | 33.870 | 4.355 | 1.00155.57 |       |      | N |
| ANISOU | 2173 | N   | ASP | A | 288 | 27460  | 12544  | 19107 | -5577      | -3390 | 586  | N |
| ATOM   | 2174 | CA  | ASP | A | 288 | -1.675 | 32.473 | 3.945 | 1.00151.96 |       |      | C |
| ANISOU | 2174 | CA  | ASP | A | 288 | 26694  | 12401  | 18644 | -5515      | -3097 | 571  | C |
| ATOM   | 2175 | C   | ASP | A | 288 | -3.021 | 31.873 | 4.308 | 1.00150.84 |       |      | C |
| ANISOU | 2175 | C   | ASP | A | 288 | 26444  | 12470  | 18396 | -5177      | -3206 | 264  | C |
| ATOM   | 2176 | O   | ASP | A | 288 | -3.415 | 30.842 | 3.772 | 1.00160.82 |       |      | O |
| ANISOU | 2176 | O   | ASP | A | 288 | 27567  | 13951  | 19585 | -5073      | -3038 | 217  | O |
| ATOM   | 2177 | CB  | ASP | A | 288 | -0.568 | 31.659 | 4.614 | 1.00157.87 |       |      | C |
| ANISOU | 2177 | CB  | ASP | A | 288 | 26996  | 13305  | 19683 | -5776      | -2890 | 725  | C |
| ATOM   | 2178 | CG  | ASP | A | 288 | 0.809  | 32.208 | 4.328 | 1.00177.07 |       |      | C |
| ANISOU | 2178 | CG  | ASP | A | 288 | 29424  | 15514  | 22339 | -6125      | -2776 | 1081 | C |
| ATOM   | 2179 | OD1 | ASP | A | 288 | 1.080  | 32.540 | 3.157 | 1.00190.51 |       |      | O |
| ANISOU | 2179 | OD1 | ASP | A | 288 | 31378  | 17059  | 23948 | -6172      | -2576 | 1239 | O |
| ATOM   | 2180 | OD2 | ASP | A | 288 | 1.616  | 32.316 | 5.276 | 1.00180.02 |       |      | O |
| ANISOU | 2180 | OD2 | ASP | A | 288 | 29562  | 15854  | 22985 | -6381      | -2902 | 1225 | O |
| ATOM   | 2181 | N   | PHE | A | 289 | -3.722 | 32.526 | 5.225 | 1.00144.15 |       |      | N |
| ANISOU | 2181 | N   | PHE | A | 289 | 25681  | 11530  | 17561 | -5019      | -3458 | 58   | N |
| ATOM   | 2182 | CA  | PHE | A | 289 | -4.966 | 31.991 | 5.753 | 1.00143.80 |       |      | C |
| ANISOU | 2182 | CA  | PHE | A | 289 | 25473  | 11663  | 17502 | -4705      | -3513 | -221 | C |
| ATOM   | 2183 | C   | PHE | A | 289 | -6.131 | 32.965 | 5.576 | 1.00152.17 |       |      | C |
| ANISOU | 2183 | C   | PHE | A | 289 | 26801  | 12473  | 18545 | -4395      | -3748 | -350 | C |
| ATOM   | 2184 | O   | PHE | A | 289 | -7.027 | 33.038 | 6.415 | 1.00150.05 |       |      | O |
| ANISOU | 2184 | O   | PHE | A | 289 | 26453  | 12199  | 18360 | -4160      | -3791 | -587 | O |
| ATOM   | 2185 | CB  | PHE | A | 289 | -4.787 | 31.608 | 7.227 | 1.00135.40 |       |      | C |
| ANISOU | 2185 | CB  | PHE | A | 289 | 24183  | 10736  | 16528 | -4792      | -3489 | -369 | C |
| ATOM   | 2186 | CG  | PHE | A | 289 | -3.709 | 30.579 | 7.460 | 1.00135.98 |       |      | C |
| ANISOU | 2186 | CG  | PHE | A | 289 | 23911  | 11042  | 16715 | -5079      | -3308 | -197 | C |
| ATOM   | 2187 | CD1 | PHE | A | 289 | -4.019 | 29.230 | 7.522 | 1.00138.43 |       |      | C |
| ANISOU | 2187 | CD1 | PHE | A | 289 | 23859  | 11677  | 17062 | -4989      | -3136 | -265 | C |
| ATOM   | 2188 | CD2 | PHE | A | 289 | -2.385 | 30.961 | 7.614 | 1.00137.97 |       |      | C |
| ANISOU | 2188 | CD2 | PHE | A | 289 | 24168  | 11158  | 17098 | -5442      | -3321 | 65   | C |
| ATOM   | 2189 | CE1 | PHE | A | 289 | -3.030 | 28.284 | 7.735 | 1.00137.60 |       |      | C |
| ANISOU | 2189 | CE1 | PHE | A | 289 | 23404  | 11741  | 17138 | -5232      | -2959 | -80  | C |
| ATOM   | 2190 | CE2 | PHE | A | 289 | -1.394 | 30.019 | 7.825 | 1.00119.14 |       |      | C |
| ANISOU | 2190 | CE2 | PHE | A | 289 | 21389  | 8944   | 14936 | -5692      | -3160 | 279  | C |
| ATOM   | 2191 | CZ  | PHE | A | 289 | -1.717 | 28.680 | 7.886 | 1.00116.57 |       |      | C |
| ANISOU | 2191 | CZ  | PHE | A | 289 | 20705  | 8926   | 14661 | -5575      | -2968 | 205  | C |
| ATOM   | 2192 | N   | GLY | A | 290 | -6.105 | 33.712 | 4.476 | 1.00161.38 |       |      | N |
| ANISOU | 2192 | N   | GLY | A | 290 | 28281  | 13405  | 19632 | -4402      | -3874 | -171 | N |
| ATOM   | 2193 | CA  | GLY | A | 290 | -7.179 | 34.631 | 4.142 | 1.00167.90 |       |      | C |
| ANISOU | 2193 | CA  | GLY | A | 290 | 29331  | 13954  | 20510 | -4114      | -4136 | -211 | C |
| ATOM   | 2194 | C   | GLY | A | 290 | -7.339 | 35.766 | 5.133 | 1.00166.48 |       |      | C |
| ANISOU | 2194 | C   | GLY | A | 290 | 29324  | 13457  | 20475 | -4026      | -4220 | -360 | C |
| ATOM   | 2195 | O   | GLY | A | 290 | -8.452 | 36.224 | 5.392 | 1.00168.53 |       |      | O |
| ANISOU | 2195 | O   | GLY | A | 290 | 29590  | 13538  | 20906 | -3693      | -4320 | -505 | O |
| ATOM   | 2196 | N   | GLY | A | 291 | -6.222 | 36.228 | 5.683 | 1.00162.08 |       |      | N |
| ANISOU | 2196 | N   | GLY | A | 291 | 28914  | 12791  | 19877 | -4337      | -4169 | -311 | N |
| ATOM   | 2197 | CA  | GLY | A | 291 | -6.256 | 37.269 | 6.689 | 1.00161.98 |       |      | C |
| ANISOU | 2197 | CA  | GLY | A | 291 | 29162  | 12451  | 19933 | -4333      | -4234 | -474 | C |
| ATOM   | 2198 | C   | GLY | A | 291 | -5.618 | 38.559 | 6.223 | 1.00162.70 |       |      | C |
| ANISOU | 2198 | C   | GLY | A | 291 | 29666  | 12141  | 20013 | -4510      | -4400 | -284 | C |
| ATOM   | 2199 | O   | GLY | A | 291 | -5.112 | 38.648 | 5.104 | 1.00157.59 |       |      | O |
| ANISOU | 2199 | O   | GLY | A | 291 | 29096  | 11483  | 19299 | -4647      | -4449 | -6   | O |
| ATOM   | 2200 | N   | THR | A | 292 | -5.640 | 39.561 | 7.095 | 1.00163.40 |       |      | N |
| ANISOU | 2200 | N   | THR | A | 292 | 30064  | 11874  | 20145 | -4527      | -4460 | -440 | N |
| ATOM   | 2201 | CA  | THR | A | 292 | -5.104 | 40.877 | 6.776 | 1.00163.98 |       |      | C |
| ANISOU | 2201 | CA  | THR | A | 292 | 30514  | 11569  | 20223 | -4662      | -4613 | -281 | C |
| ATOM   | 2202 | C   | THR | A | 292 | -3.598 | 40.938 | 6.997 | 1.00165.09 |       |      | C |
| ANISOU | 2202 | C   | THR | A | 292 | 30552  | 11914  | 20262 | -5085      | -4578 | -60  | C |
| ATOM   | 2203 | O   | THR | A | 292 | -2.891 | 41.667 | 6.304 | 1.00166.56 |       |      | O |

|        |      |     |     |   |     |        |        |        |            |       |       |   |
|--------|------|-----|-----|---|-----|--------|--------|--------|------------|-------|-------|---|
| ANISOU | 2203 | O   | THR | A | 292 | 30865  | 11978  | 20442  | -5242      | -4655 | 202   | O |
| ATOM   | 2204 | CB  | THR | A | 292 | -5.773 | 41.968 | 7.626  | 1.00167.11 |       |       | C |
| ANISOU | 2204 | CB  | THR | A | 292 | 31207  | 11575  | 20712  | -4438      | -4609 | -543  | C |
| ATOM   | 2205 | OG1 | THR | A | 292 | -5.466 | 41.752 | 9.009  | 1.00167.52 |       |       | O |
| ANISOU | 2205 | OG1 | THR | A | 292 | 31236  | 11771  | 20641  | -4587      | -4453 | -772  | O |
| ATOM   | 2206 | CG2 | THR | A | 292 | -7.280 | 41.937 | 7.436  | 1.00165.31 |       |       | C |
| ANISOU | 2206 | CG2 | THR | A | 292 | 30948  | 11145  | 20717  | -3956      | -4598 | -718  | C |
| ATOM   | 2207 | N   | LEU | A | 293 | -3.113 | 40.168 | 7.967  | 1.00166.83 |       |       | N |
| ANISOU | 2207 | N   | LEU | A | 293 | 30524  | 12428  | 20436  | -5273      | -4480 | -138  | N |
| ATOM   | 2208 | CA  | LEU | A | 293 | -1.693 | 40.162 | 8.307  | 1.00166.10 |       |       | C |
| ANISOU | 2208 | CA  | LEU | A | 293 | 30261  | 12509  | 20340  | -5676      | -4501 | 109   | C |
| ATOM   | 2209 | C   | LEU | A | 293 | -0.854 | 39.584 | 7.168  | 1.00168.45 |       |       | C |
| ANISOU | 2209 | C   | LEU | A | 293 | 30297  | 12973  | 20735  | -5858      | -4406 | 462   | C |
| ATOM   | 2210 | O   | LEU | A | 293 | -1.354 | 38.799 | 6.362  | 1.00166.79 |       |       | O |
| ANISOU | 2210 | O   | LEU | A | 293 | 29999  | 12856  | 20519  | -5720      | -4291 | 464   | O |
| ATOM   | 2211 | CB  | LEU | A | 293 | -1.455 | 39.377 | 9.602  | 1.00155.80 |       |       | C |
| ANISOU | 2211 | CB  | LEU | A | 293 | 28739  | 11474  | 18985  | -5830      | -4467 | -16   | C |
| ATOM   | 2212 | CG  | LEU | A | 293 | -2.254 | 39.832 | 10.826 | 1.00147.09 |       |       | C |
| ANISOU | 2212 | CG  | LEU | A | 293 | 27944  | 10216  | 17729  | -5691      | -4462 | -387  | C |
| ATOM   | 2213 | CD1 | LEU | A | 293 | -1.720 | 39.181 | 12.093 | 1.00141.84 |       |       | C |
| ANISOU | 2213 | CD1 | LEU | A | 293 | 27131  | 9817   | 16946  | -5963      | -4483 | -412  | C |
| ATOM   | 2214 | CD2 | LEU | A | 293 | -2.243 | 41.344 | 10.947 | 1.00146.21 |       |       | C |
| ANISOU | 2214 | CD2 | LEU | A | 293 | 28279  | 9708   | 17565  | -5675      | -4561 | -432  | C |
| ATOM   | 2215 | N   | PRO | A | 294 | 0.426  | 39.983 | 7.092  | 1.00169.88 |       |       | N |
| ANISOU | 2215 | N   | PRO | A | 294 | 30370  | 13163  | 21014  | -6177      | -4429 | 763   | N |
| ATOM   | 2216 | CA  | PRO | A | 294 | 1.341  | 39.473 | 6.064  | 1.00168.90 |       |       | C |
| ANISOU | 2216 | CA  | PRO | A | 294 | 29981  | 13154  | 21038  | -6365      | -4232 | 1110  | C |
| ATOM   | 2217 | C   | PRO | A | 294 | 1.554  | 37.966 | 6.153  | 1.00167.40 |       |       | C |
| ANISOU | 2217 | C   | PRO | A | 294 | 29347  | 13286  | 20971  | -6424      | -4012 | 1149  | C |
| ATOM   | 2218 | O   | PRO | A | 294 | 1.061  | 37.322 | 7.079  | 1.00162.38 |       |       | O |
| ANISOU | 2218 | O   | PRO | A | 294 | 28587  | 12815  | 20297  | -6349      | -4064 | 926   | O |
| ATOM   | 2219 | CB  | PRO | A | 294 | 2.651  | 40.200 | 6.375  | 1.00174.92 |       |       | C |
| ANISOU | 2219 | CB  | PRO | A | 294 | 30633  | 13861  | 21967  | -6691      | -4324 | 1389  | C |
| ATOM   | 2220 | CG  | PRO | A | 294 | 2.231  | 41.451 | 7.056  | 1.00181.51 |       |       | C |
| ANISOU | 2220 | CG  | PRO | A | 294 | 31885  | 14440  | 22639  | -6627      | -4596 | 1195  | C |
| ATOM   | 2221 | CD  | PRO | A | 294 | 1.036  | 41.071 | 7.877  | 1.00178.44 |       |       | C |
| ANISOU | 2221 | CD  | PRO | A | 294 | 31628  | 14086  | 22084  | -6367      | -4626 | 798   | C |
| ATOM   | 2222 | N   | LYS | A | 295 | 2.289  | 37.424 | 5.187  | 1.00177.56 |       |       | N |
| ANISOU | 2222 | N   | LYS | A | 295 | 30416  | 14638  | 22409  | -6558      | -3726 | 1432  | N |
| ATOM   | 2223 | CA  | LYS | A | 295 | 2.580  | 35.996 | 5.122  | 1.00178.87 |       |       | C |
| ANISOU | 2223 | CA  | LYS | A | 295 | 30156  | 15060  | 22747  | -6615      | -3442 | 1506  | C |
| ATOM   | 2224 | C   | LYS | A | 295 | 3.223  | 35.515 | 6.417  | 1.00172.33 |       |       | C |
| ANISOU | 2224 | C   | LYS | A | 295 | 28885  | 14436  | 22157  | -6785      | -3557 | 1560  | C |
| ATOM   | 2225 | O   | LYS | A | 295 | 4.055  | 36.216 | 6.996  | 1.00187.15 |       |       | O |
| ANISOU | 2225 | O   | LYS | A | 295 | 30671  | 16259  | 24177  | -6988      | -3745 | 1732  | O |
| ATOM   | 2226 | CB  | LYS | A | 295 | 3.503  | 35.710 | 3.935  | 1.00186.02 |       |       | C |
| ANISOU | 2226 | CB  | LYS | A | 295 | 30917  | 15928  | 23834  | -6768      | -3032 | 1842  | C |
| ATOM   | 2227 | CG  | LYS | A | 295 | 3.781  | 34.239 | 3.691  | 1.00184.95 |       |       | C |
| ANISOU | 2227 | CG  | LYS | A | 295 | 30388  | 15991  | 23893  | -6801      | -2634 | 1918  | C |
| ATOM   | 2228 | CD  | LYS | A | 295 | 4.617  | 34.041 | 2.437  | 1.00185.65 |       |       | C |
| ANISOU | 2228 | CD  | LYS | A | 295 | 30436  | 15976  | 24127  | -6926      | -2115 | 2215  | C |
| ATOM   | 2229 | CE  | LYS | A | 295 | 4.845  | 32.566 | 2.158  | 1.00188.77 |       |       | C |
| ANISOU | 2229 | CE  | LYS | A | 295 | 30487  | 16519  | 24717  | -6935      | -1640 | 2265  | C |
| ATOM   | 2230 | NZ  | LYS | A | 295 | 5.475  | 31.878 | 3.319  | 1.00189.92 |       |       | N |
| ANISOU | 2230 | NZ  | LYS | A | 295 | 29970  | 16857  | 25333  | -7020      | -1710 | 2375  | N |
| ATOM   | 2231 | N   | TYR | A | 296 | 2.826  | 34.329 | 6.873  | 1.00206.78 |       |       | N |
| ANISOU | 2231 | N   | TYR | A | 296 | 35089  | 22701  | 20777  | -14761     | 2160  | -2725 | N |
| ATOM   | 2232 | CA  | TYR | A | 296 | 3.332  | 33.790 | 8.132  | 1.00197.96 |       |       | C |
| ANISOU | 2232 | CA  | TYR | A | 296 | 33861  | 21633  | 19723  | -14706     | 2312  | -2696 | C |
| ATOM   | 2233 | C   | TYR | A | 296 | 4.849  | 33.641 | 8.131  | 1.00201.39 |       |       | C |
| ANISOU | 2233 | C   | TYR | A | 296 | 34293  | 22109  | 20119  | -14773     | 2321  | -2457 | C |
| ATOM   | 2234 | O   | TYR | A | 296 | 5.429  | 33.063 | 7.210  | 1.00191.44 |       |       | O |
| ANISOU | 2234 | O   | TYR | A | 296 | 33106  | 20833  | 18799  | -14822     | 2511  | -2445 | O |
| ATOM   | 2235 | CB  | TYR | A | 296 | 2.679  | 32.447 | 8.473  | 1.00190.57 |       |       | C |
| ANISOU | 2235 | CB  | TYR | A | 296 | 32894  | 20681  | 18831  | -14628     | 2745  | -2961 | C |
| ATOM   | 2236 | CG  | TYR | A | 296 | 3.324  | 31.761 | 9.661  | 1.00195.90 |       |       | C |
| ANISOU | 2236 | CG  | TYR | A | 296 | 33499  | 21381  | 19555  | -14587     | 2921  | -2914 | C |
| ATOM   | 2237 | CD1 | TYR | A | 296 | 3.012  | 32.138 | 10.960 | 1.00200.65 |       |       | C |
| ANISOU | 2237 | CD1 | TYR | A | 296 | 34011  | 22005  | 20222  | -14550     | 2802  | -2909 | C |
| ATOM   | 2238 | CD2 | TYR | A | 296 | 4.253  | 30.743 | 9.482  | 1.00199.50 |       |       | C |

|        |      |     |     |   |     |        |        |        |            |      |       |   |
|--------|------|-----|-----|---|-----|--------|--------|--------|------------|------|-------|---|
| ANISOU | 2238 | CD2 | TYR | A | 296 | 33980  | 21811  | 20009  | -14591     | 3197 | -2871 | C |
| ATOM   | 2239 | CE1 | TYR | A | 296 | 3.604  | 31.518 | 12.048 | 1.00201.64 |      |       | C |
| ANISOU | 2239 | CE1 | TYR | A | 296 | 34095  | 22140  | 20378  | -14530     | 2937 | -2851 | C |
| ATOM   | 2240 | CE2 | TYR | A | 296 | 4.849  | 30.119 | 10.561 | 1.00199.54 |      |       | C |
| ANISOU | 2240 | CE2 | TYR | A | 296 | 33915  | 21801  | 20099  | -14554     | 3322 | -2809 | C |
| ATOM   | 2241 | CZ  | TYR | A | 296 | 4.523  | 30.510 | 11.841 | 1.00197.99 |      |       | C |
| ANISOU | 2241 | CZ  | TYR | A | 296 | 33652  | 21641  | 19936  | -14529     | 3182 | -2793 | C |
| ATOM   | 2242 | OH  | TYR | A | 296 | 5.115  | 29.887 | 12.916 | 1.00193.79 |      |       | O |
| ANISOU | 2242 | OH  | TYR | A | 296 | 33073  | 21084  | 19476  | -14510     | 3286 | -2717 | O |
| ATOM   | 2243 | N   | ASP | A | 297 | 5.482  | 34.166 | 9.176  | 1.00205.22 |      |       | N |
| ANISOU | 2243 | N   | ASP | A | 297 | 34678  | 22634  | 20662  | -14782     | 2115 | -2276 | N |
| ATOM   | 2244 | CA  | ASP | A | 297 | 6.928  | 34.087 | 9.319  | 1.00206.84 |      |       | C |
| ANISOU | 2244 | CA  | ASP | A | 297 | 34814  | 22871  | 20906  | -14853     | 2080 | -2034 | C |
| ATOM   | 2245 | C   | ASP | A | 297 | 7.309  | 33.078 | 10.396 | 1.00208.13 |      |       | C |
| ANISOU | 2245 | C   | ASP | A | 297 | 34865  | 23025  | 21190  | -14787     | 2310 | -2052 | C |
| ATOM   | 2246 | O   | ASP | A | 297 | 7.092  | 33.311 | 11.584 | 1.00189.99 |      |       | O |
| ANISOU | 2246 | O   | ASP | A | 297 | 32508  | 20752  | 18928  | -14757     | 2200 | -2037 | O |
| ATOM   | 2247 | CB  | ASP | A | 297 | 7.507  | 35.462 | 9.654  | 1.00205.30 |      |       | C |
| ANISOU | 2247 | CB  | ASP | A | 297 | 34584  | 22722  | 20700  | -14947     | 1644 | -1778 | C |
| ATOM   | 2248 | CG  | ASP | A | 297 | 9.022  | 35.462 | 9.694  | 1.00207.10 |      |       | C |
| ANISOU | 2248 | CG  | ASP | A | 297 | 34699  | 22985  | 21007  | -15050     | 1586 | -1515 | C |
| ATOM   | 2249 | OD1 | ASP | A | 297 | 9.634  | 34.558 | 9.086  | 1.00208.05 |      |       | O |
| ANISOU | 2249 | OD1 | ASP | A | 297 | 34787  | 23073  | 21189  | -15059     | 1860 | -1517 | O |
| ATOM   | 2250 | OD2 | ASP | A | 297 | 9.603  | 36.368 | 10.329 | 1.00207.08 |      |       | O |
| ANISOU | 2250 | OD2 | ASP | A | 297 | 34623  | 23029  | 21029  | -15130     | 1272 | -1305 | O |
| ATOM   | 2251 | N   | GLY | A | 298 | 7.876  | 31.955 | 9.969  | 1.00207.20 |      |       | N |
| ANISOU | 2251 | N   | GLY | A | 298 | 34733  | 22849  | 21143  | -14771     | 2634 | -2080 | N |
| ATOM   | 2252 | CA  | GLY | A | 298 | 8.286  | 30.910 | 10.887 | 1.00202.81 |      |       | C |
| ANISOU | 2252 | CA  | GLY | A | 298 | 34083  | 22239  | 20738  | -14708     | 2864 | -2078 | C |
| ATOM   | 2253 | C   | GLY | A | 298 | 9.583  | 31.243 | 11.595 | 1.00203.46 |      |       | C |
| ANISOU | 2253 | C   | GLY | A | 298 | 33984  | 22338  | 20982  | -14773     | 2644 | -1763 | C |
| ATOM   | 2254 | O   | GLY | A | 298 | 9.873  | 30.701 | 12.660 | 1.00199.96 |      |       | O |
| ANISOU | 2254 | O   | GLY | A | 298 | 33451  | 21860  | 20665  | -14737     | 2702 | -1704 | O |
| ATOM   | 2255 | N   | LYS | A | 299 | 10.365 | 32.139 | 11.001 | 1.00208.02 |      |       | N |
| ANISOU | 2255 | N   | LYS | A | 299 | 34508  | 22967  | 21562  | -14885     | 2389 | -1550 | N |
| ATOM   | 2256 | CA  | LYS | A | 299 | 11.645 | 32.538 | 11.572 | 1.00212.25 |      |       | C |
| ANISOU | 2256 | CA  | LYS | A | 299 | 34836  | 23533  | 22278  | -14977     | 2168 | -1230 | C |
| ATOM   | 2257 | C   | LYS | A | 299 | 11.464 | 33.286 | 12.891 | 1.00204.60 |      |       | C |
| ANISOU | 2257 | C   | LYS | A | 299 | 33837  | 22640  | 21263  | -14997     | 1858 | -1151 | C |
| ATOM   | 2258 | O   | LYS | A | 299 | 12.047 | 32.915 | 13.910 | 1.00193.23 |      |       | O |
| ANISOU | 2258 | O   | LYS | A | 299 | 32256  | 21186  | 19976  | -15002     | 1839 | -1013 | O |
| ATOM   | 2259 | CB  | LYS | A | 299 | 12.430 | 33.406 | 10.582 | 1.00227.03 |      |       | C |
| ANISOU | 2259 | CB  | LYS | A | 299 | 36674  | 25450  | 24139  | -15119     | 1978 | -1039 | C |
| ATOM   | 2260 | CG  | LYS | A | 299 | 12.670 | 32.755 | 9.226  | 1.00237.62 |      |       | C |
| ANISOU | 2260 | CG  | LYS | A | 299 | 38065  | 26717  | 25501  | -15130     | 2282 | -1107 | C |
| ATOM   | 2261 | CD  | LYS | A | 299 | 13.617 | 33.587 | 8.363  | 1.00243.21 |      |       | C |
| ANISOU | 2261 | CD  | LYS | A | 299 | 38716  | 27468  | 26225  | -15301     | 2112 | -879  | C |
| ATOM   | 2262 | CE  | LYS | A | 299 | 13.058 | 34.976 | 8.084  | 1.00236.80 |      |       | C |
| ANISOU | 2262 | CE  | LYS | A | 299 | 38084  | 26741  | 25146  | -15388     | 1745 | -877  | C |
| ATOM   | 2263 | NZ  | LYS | A | 299 | 13.980 | 35.795 | 7.245  | 1.00227.10 |      |       | N |
| ANISOU | 2263 | NZ  | LYS | A | 299 | 36830  | 25546  | 23912  | -15579     | 1588 | -655  | N |
| ATOM   | 2264 | N   | ALA | A | 300 | 10.648 | 34.336 | 12.864 | 1.00201.91 |      |       | N |
| ANISOU | 2264 | N   | ALA | A | 300 | 33632  | 22360  | 20725  | -15015     | 1620 | -1231 | N |
| ATOM   | 2265 | CA  | ALA | A | 300 | 10.439 | 35.184 | 14.034 | 1.00202.63 |      |       | C |
| ANISOU | 2265 | CA  | ALA | A | 300 | 33720  | 22511  | 20760  | -15047     | 1322 | -1165 | C |
| ATOM   | 2266 | C   | ALA | A | 300 | 9.765  | 34.434 | 15.177 | 1.00198.07 |      |       | C |
| ANISOU | 2266 | C   | ALA | A | 300 | 33165  | 21908  | 20186  | -14951     | 1502 | -1327 | C |
| ATOM   | 2267 | O   | ALA | A | 300 | 10.112 | 34.623 | 16.342 | 1.00196.61 |      |       | O |
| ANISOU | 2267 | O   | ALA | A | 300 | 32922  | 21755  | 20027  | -14997     | 1347 | -1207 | O |
| ATOM   | 2268 | CB  | ALA | A | 300 | 9.632  | 36.419 | 13.659 | 1.00207.05 |      |       | C |
| ANISOU | 2268 | CB  | ALA | A | 300 | 34418  | 23091  | 21160  | -15070     | 1069 | -1225 | C |
| ATOM   | 2269 | N   | VAL | A | 301 | 8.799  | 33.587 | 14.838 | 1.00198.88 |      |       | N |
| ANISOU | 2269 | N   | VAL | A | 301 | 33364  | 21954  | 20249  | -14838     | 1833 | -1599 | N |
| ATOM   | 2270 | CA  | VAL | A | 301 | 8.097  | 32.789 | 15.836 | 1.00195.32 |      |       | C |
| ANISOU | 2270 | CA  | VAL | A | 301 | 32954  | 21469  | 19790  | -14761     | 2059 | -1777 | C |
| ATOM   | 2271 | C   | VAL | A | 301 | 9.054  | 31.809 | 16.508 | 1.00197.49 |      |       | C |
| ANISOU | 2271 | C   | VAL | A | 301 | 33128  | 21686  | 20223  | -14766     | 2192 | -1631 | C |
| ATOM   | 2272 | O   | VAL | A | 301 | 9.031  | 31.645 | 17.728 | 1.00192.98 |      |       | O |
| ANISOU | 2272 | O   | VAL | A | 301 | 32558  | 21115  | 19649  | -14780     | 2161 | -1602 | O |
| ATOM   | 2273 | CB  | VAL | A | 301 | 6.912  | 32.019 | 15.216 | 1.00190.59 |      |       | C |

|        |      |     |     |   |     |        |        |        |            |      |       |   |
|--------|------|-----|-----|---|-----|--------|--------|--------|------------|------|-------|---|
| ANISOU | 2273 | CB  | VAL | A | 301 | 32462  | 20817  | 19136  | -14659     | 2416 | -2099 | C |
| ATOM   | 2274 | CG1 | VAL | A | 301 | 6.256  | 31.126 | 16.254 | 1.00188.87 |      |       | C |
| ANISOU | 2274 | CG1 | VAL | A | 301 | 32290  | 20560  | 18914  | -14603     | 2686 | -2279 | C |
| ATOM   | 2275 | CG2 | VAL | A | 301 | 5.897  | 32.988 | 14.629 | 1.00188.97 |      |       | C |
| ANISOU | 2275 | CG2 | VAL | A | 301 | 32319  | 20642  | 18839  | -14653     | 2260 | -2226 | C |
| ATOM   | 2276 | N   | ALA | A | 302 | 9.905  | 31.174 | 15.709 | 1.00200.07 |      |       | N |
| ANISOU | 2276 | N   | ALA | A | 302 | 33364  | 21947  | 20707  | -14763     | 2339 | -1525 | N |
| ATOM   | 2277 | CA  | ALA | A | 302 | 10.869 | 30.208 | 16.228 | 1.00197.84 |      |       | C |
| ANISOU | 2277 | CA  | ALA | A | 302 | 32942  | 21563  | 20664  | -14758     | 2476 | -1347 | C |
| ATOM   | 2278 | C   | ALA | A | 302 | 11.915 | 30.872 | 17.119 | 1.00199.32 |      |       | C |
| ANISOU | 2278 | C   | ALA | A | 302 | 32955  | 21812  | 20964  | -14873     | 2123 | -1017 | C |
| ATOM   | 2279 | O   | ALA | A | 302 | 12.460 | 30.240 | 18.025 | 1.00193.69 |      |       | O |
| ANISOU | 2279 | O   | ALA | A | 302 | 32145  | 21030  | 20417  | -14880     | 2160 | -865  | O |
| ATOM   | 2280 | CB  | ALA | A | 302 | 11.541 | 29.461 | 15.088 | 1.00192.54 |      |       | C |
| ANISOU | 2280 | CB  | ALA | A | 302 | 32187  | 20788  | 20183  | -14729     | 2728 | -1295 | C |
| ATOM   | 2281 | N   | GLU | A | 303 | 12.193 | 32.145 | 16.857 | 1.00210.64 |      |       | N |
| ANISOU | 2281 | N   | GLU | A | 303 | 34357  | 23366  | 22312  | -14975     | 1778 | -896  | N |
| ATOM   | 2282 | CA  | GLU | A | 303 | 13.181 | 32.882 | 17.637 | 1.00223.30 |      |       | C |
| ANISOU | 2282 | CA  | GLU | A | 303 | 35799  | 25046  | 24000  | -15113     | 1424 | -590  | C |
| ATOM   | 2283 | C   | GLU | A | 303 | 12.665 | 33.201 | 19.037 | 1.00232.98 |      |       | C |
| ANISOU | 2283 | C   | GLU | A | 303 | 37132  | 26321  | 25070  | -15141     | 1261 | -634  | C |
| ATOM   | 2284 | O   | GLU | A | 303 | 13.430 | 33.204 | 20.002 | 1.00243.00 |      |       | O |
| ANISOU | 2284 | O   | GLU | A | 303 | 38282  | 27608  | 26440  | -15231     | 1092 | -408  | O |
| ATOM   | 2285 | CB  | GLU | A | 303 | 13.593 | 34.170 | 16.921 | 1.00219.10 |      |       | C |
| ANISOU | 2285 | CB  | GLU | A | 303 | 35233  | 24614  | 23400  | -15231     | 1119 | -461  | C |
| ATOM   | 2286 | CG  | GLU | A | 303 | 14.668 | 34.958 | 17.653 | 1.00215.95 |      |       | C |
| ANISOU | 2286 | CG  | GLU | A | 303 | 34658  | 24302  | 23089  | -15399     | 758  | -144  | C |
| ATOM   | 2287 | CD  | GLU | A | 303 | 15.122 | 36.180 | 16.887 | 1.00221.44 |      |       | C |
| ANISOU | 2287 | CD  | GLU | A | 303 | 35332  | 25080  | 23725  | -15533     | 487  | -13   | C |
| ATOM   | 2288 | OE1 | GLU | A | 303 | 14.608 | 36.409 | 15.772 | 1.00221.72 |      |       | O |
| ANISOU | 2288 | OE1 | GLU | A | 303 | 35499  | 25097  | 23649  | -15493     | 574  | -157  | O |
| ATOM   | 2289 | OE2 | GLU | A | 303 | 15.994 | 36.912 | 17.401 | 1.00226.61 |      |       | O |
| ANISOU | 2289 | OE2 | GLU | A | 303 | 35850  | 25815  | 24438  | -15694     | 185  | 239   | O |
| ATOM   | 2290 | N   | GLN | A | 304 | 11.366 | 33.465 | 19.145 | 1.00227.58 |      |       | N |
| ANISOU | 2290 | N   | GLN | A | 304 | 36661  | 25656  | 24155  | -15073     | 1322 | -916  | N |
| ATOM   | 2291 | CA  | GLN | A | 304 | 10.755 | 33.751 | 20.437 | 1.00219.74 |      |       | C |
| ANISOU | 2291 | CA  | GLN | A | 304 | 35785  | 24698  | 23007  | -15101     | 1224 | -992  | C |
| ATOM   | 2292 | C   | GLN | A | 304 | 10.775 | 32.518 | 21.329 | 1.00215.88 |      |       | C |
| ANISOU | 2292 | C   | GLN | A | 304 | 35313  | 24123  | 22588  | -15065     | 1470 | -1015 | C |
| ATOM   | 2293 | O   | GLN | A | 304 | 10.686 | 32.623 | 22.551 | 1.00221.79 |      |       | O |
| ANISOU | 2293 | O   | GLN | A | 304 | 36130  | 24896  | 23245  | -15134     | 1364 | -984  | O |
| ATOM   | 2294 | CB  | GLN | A | 304 | 9.322  | 34.254 | 20.266 | 1.00191.88 |      |       | C |
| ANISOU | 2294 | CB  | GLN | A | 304 | 32431  | 21184  | 19292  | -15030     | 1288 | -1287 | C |
| ATOM   | 2295 | CG  | GLN | A | 304 | 9.206  | 35.522 | 19.444 | 1.00215.78 |      |       | C |
| ANISOU | 2295 | CG  | GLN | A | 304 | 35467  | 24257  | 22262  | -15064     | 1026 | -1253 | C |
| ATOM   | 2296 | CD  | GLN | A | 304 | 7.917  | 36.271 | 19.712 | 1.00213.61 |      |       | C |
| ANISOU | 2296 | CD  | GLN | A | 304 | 35316  | 23976  | 21869  | -15026     | 980  | -1468 | C |
| ATOM   | 2297 | OE1 | GLN | A | 304 | 7.269  | 36.067 | 20.739 | 1.00191.67 |      |       | O |
| ANISOU | 2297 | OE1 | GLN | A | 304 | 32605  | 21190  | 19032  | -15014     | 1076 | -1603 | O |
| ATOM   | 2298 | NE2 | GLN | A | 304 | 7.538  | 37.147 | 18.788 | 1.00211.98 |      |       | N |
| ANISOU | 2298 | NE2 | GLN | A | 304 | 35136  | 23755  | 21651  | -15014     | 835  | -1498 | N |
| ATOM   | 2299 | N   | LEU | A | 305 | 10.888 | 31.348 | 20.708 | 1.00209.35 |      |       | N |
| ANISOU | 2299 | N   | LEU | A | 305 | 34445  | 23180  | 21918  | -14967     | 1804 | -1069 | N |
| ATOM   | 2300 | CA  | LEU | A | 305 | 11.001 | 30.097 | 21.444 | 1.00213.75 |      |       | C |
| ANISOU | 2300 | CA  | LEU | A | 305 | 35019  | 23609  | 22587  | -14930     | 2058 | -1057 | C |
| ATOM   | 2301 | C   | LEU | A | 305 | 12.399 | 29.948 | 22.035 | 1.00229.39 |      |       | C |
| ANISOU | 2301 | C   | LEU | A | 305 | 36785  | 25556  | 24818  | -15024     | 1864 | -668  | C |
| ATOM   | 2302 | O   | LEU | A | 305 | 12.552 | 29.702 | 23.232 | 1.00232.18 |      |       | O |
| ANISOU | 2302 | O   | LEU | A | 305 | 37174  | 25886  | 25158  | -15088     | 1795 | -565  | O |
| ATOM   | 2303 | CB  | LEU | A | 305 | 10.681 | 28.907 | 20.537 | 1.00206.97 |      |       | C |
| ANISOU | 2303 | CB  | LEU | A | 305 | 34192  | 22608  | 21838  | -14796     | 2491 | -1232 | C |
| ATOM   | 2304 | CG  | LEU | A | 305 | 9.231  | 28.416 | 20.495 | 1.00199.19 |      |       | C |
| ANISOU | 2304 | CG  | LEU | A | 305 | 33432  | 21600  | 20651  | -14709     | 2817 | -1622 | C |
| ATOM   | 2305 | CD1 | LEU | A | 305 | 8.279  | 29.505 | 20.019 | 1.00190.76 |      |       | C |
| ANISOU | 2305 | CD1 | LEU | A | 305 | 32438  | 20672  | 19371  | -14711     | 2685 | -1816 | C |
| ATOM   | 2306 | CD2 | LEU | A | 305 | 9.118  | 27.182 | 19.614 | 1.00194.08 |      |       | C |
| ANISOU | 2306 | CD2 | LEU | A | 305 | 32812  | 20800  | 20129  | -14601     | 3236 | -1758 | C |
| ATOM   | 2307 | N   | PHE | A | 306 | 13.412 | 30.104 | 21.187 | 1.00239.19 |      |       | N |
| ANISOU | 2307 | N   | PHE | A | 306 | 37793  | 26794  | 26294  | -15045     | 1787 | -443  | N |
| ATOM   | 2308 | CA  | PHE | A | 306 | 14.805 | 30.005 | 21.613 | 1.00243.44 |      |       | C |

|        |      |     |     |   |     |         |        |        |            |      |      |   |
|--------|------|-----|-----|---|-----|---------|--------|--------|------------|------|------|---|
| ANISOU | 2308 | CA  | PHE | A | 306 | 38049   | 27307  | 27141  | -15140     | 1620 | -36  | C |
| ATOM   | 2309 | C   | PHE | A | 306 | 15.748  | 30.545 | 20.542 | 1.00249.25 |      |      | C |
| ANISOU | 2309 | C   | PHE | A | 306 | 38536   | 28093  | 28074  | -15192     | 1512 | 165  | C |
| ATOM   | 2310 | O   | PHE | A | 306 | 16.475  | 31.512 | 20.771 | 1.00251.71 |      |      | O |
| ANISOU | 2310 | O   | PHE | A | 306 | 38705   | 28534  | 28401  | -15341     | 1163 | 385  | O |
| ATOM   | 2311 | CB  | PHE | A | 306 | 15.166  | 28.556 | 21.954 | 1.00233.81 |      |      | C |
| ANISOU | 2311 | CB  | PHE | A | 306 | 36749   | 25873  | 26215  | -15055     | 1937 | 92   | C |
| ATOM   | 2312 | CG  | PHE | A | 306 | 14.876  | 27.580 | 20.850 | 1.00221.60 |      |      | C |
| ANISOU | 2312 | CG  | PHE | A | 306 | 35229   | 24171  | 24800  | -14899     | 2364 | -67  | C |
| ATOM   | 2313 | CD1 | PHE | A | 306 | 15.865  | 27.213 | 19.953 | 1.00223.06 |      |      | C |
| ANISOU | 2313 | CD1 | PHE | A | 306 | 35142   | 24266  | 25346  | -14870     | 2497 | 172  | C |
| ATOM   | 2314 | CD2 | PHE | A | 306 | 13.615  | 27.025 | 20.711 | 1.00213.35 |      |      | C |
| ANISOU | 2314 | CD2 | PHE | A | 306 | 34475   | 23071  | 23518  | -14794     | 2654 | -455 | C |
| ATOM   | 2315 | CE1 | PHE | A | 306 | 15.599  | 26.314 | 18.940 | 1.00222.58 |      |      | C |
| ANISOU | 2315 | CE1 | PHE | A | 306 | 35134   | 24056  | 25382  | -14739     | 2900 | 17   | C |
| ATOM   | 2316 | CE2 | PHE | A | 306 | 13.343  | 26.130 | 19.698 | 1.00213.07 |      |      | C |
| ANISOU | 2316 | CE2 | PHE | A | 306 | 34486   | 22897  | 23574  | -14670     | 3043 | -618 | C |
| ATOM   | 2317 | CZ  | PHE | A | 306 | 14.336  | 25.772 | 18.813 | 1.00216.64 |      |      | C |
| ANISOU | 2317 | CZ  | PHE | A | 306 | 34700   | 23252  | 24360  | -14642     | 3161 | -387 | C |
| ATOM   | 2318 | C18 | RET | B | 400 | -8.758  | 14.552 | 9.658  | 1.00147.74 |      |      | C |
| ATOM   | 2319 | C5  | RET | B | 400 | -8.115  | 15.221 | 10.823 | 1.00139.58 |      |      | C |
| ATOM   | 2320 | C6  | RET | B | 400 | -6.773  | 15.283 | 10.955 | 1.00143.62 |      |      | C |
| ATOM   | 2321 | C1  | RET | B | 400 | -6.068  | 15.182 | 12.290 | 1.00137.39 |      |      | C |
| ATOM   | 2322 | C2  | RET | B | 400 | -7.093  | 14.759 | 13.354 | 1.00141.66 |      |      | C |
| ATOM   | 2323 | C3  | RET | B | 400 | -8.332  | 15.639 | 13.302 | 1.00141.66 |      |      | C |
| ATOM   | 2324 | C4  | RET | B | 400 | -9.047  | 15.475 | 11.971 | 1.00135.03 |      |      | C |
| ATOM   | 2325 | C16 | RET | B | 400 | -5.429  | 16.535 | 12.674 | 1.00132.77 |      |      | C |
| ATOM   | 2326 | C17 | RET | B | 400 | -4.934  | 14.143 | 12.251 | 1.00142.10 |      |      | C |
| ATOM   | 2327 | C7  | RET | B | 400 | -5.906  | 15.091 | 9.799  | 1.00156.02 |      |      | C |
| ATOM   | 2328 | C8  | RET | B | 400 | -4.977  | 15.921 | 9.322  | 1.00152.33 |      |      | C |
| ATOM   | 2329 | C9  | RET | B | 400 | -4.297  | 15.673 | 8.049  | 1.00138.37 |      |      | C |
| ATOM   | 2330 | C10 | RET | B | 400 | -2.956  | 15.842 | 7.931  | 1.00125.96 |      |      | C |
| ATOM   | 2331 | C19 | RET | B | 400 | -5.152  | 15.225 | 6.895  | 1.00142.88 |      |      | C |
| TER    |      |     |     |   |     |         |        |        |            |      |      |   |
| ATOM   | 2332 | O1  | TAR | C | 500 | -14.302 | 20.601 | 28.055 | 1.00101.99 |      |      | O |
| ATOM   | 2333 | O11 | TAR | C | 500 | -13.167 | 21.176 | 26.214 | 1.00113.34 |      |      | O |
| ATOM   | 2334 | C1  | TAR | C | 500 | -13.259 | 20.615 | 27.493 | 1.00108.06 |      |      | C |
| ATOM   | 2335 | C2  | TAR | C | 500 | -11.981 | 20.226 | 28.234 | 1.00122.35 |      |      | C |
| ATOM   | 2336 | O2  | TAR | C | 500 | -10.992 | 21.215 | 28.185 | 1.00129.24 |      |      | O |
| ATOM   | 2337 | C3  | TAR | C | 500 | -11.451 | 18.854 | 27.833 | 1.00135.71 |      |      | C |
| ATOM   | 2338 | O3  | TAR | C | 500 | -12.459 | 17.895 | 27.658 | 1.00152.20 |      |      | O |
| ATOM   | 2339 | C4  | TAR | C | 500 | -10.448 | 18.921 | 26.680 | 1.00132.08 |      |      | C |
| ATOM   | 2340 | O4  | TAR | C | 500 | -10.746 | 19.455 | 25.665 | 1.00128.59 |      |      | O |
| ATOM   | 2341 | O41 | TAR | C | 500 | -9.168  | 18.372 | 26.830 | 1.00132.40 |      |      | O |
| TER    |      |     |     |   |     |         |        |        |            |      |      |   |
| HETATM | 2342 | O   | HOH | S | 1   | -4.720  | 26.402 | 46.063 | 1.00101.89 |      |      | O |
| HETATM | 2343 | O   | HOH | S | 2   | 2.830   | 6.442  | 39.080 | 1.00112.65 |      |      | O |
| HETATM | 2344 | O   | HOH | S | 3   | -5.225  | 37.136 | 3.342  | 1.00120.59 |      |      | O |
| HETATM | 2345 | O   | HOH | S | 4   | -3.061  | 36.157 | 32.459 | 1.00114.73 |      |      | O |
| TER    |      |     |     |   |     |         |        |        |            |      |      |   |
| END    |      |     |     |   |     |         |        |        |            |      |      |   |

COORDINATES OF R234W:9-CIS-RETINAL IN PDB FORMAT:

```

REMARK Date 2009-11-11 Time 16:55:11 CET +0100 (1257954911.83 s)
REMARK PHENIX refinement
REMARK
REMARK ***** INPUT FILES AND LABELS *****
REMARK Reflections:
REMARK   file name       : 9-cis.mtz
REMARK   labels          : ['FP,SIGFP']
REMARK R-free flags:
REMARK   file name       : 9-cis.mtz
REMARK   label           : FreeRflag
REMARK   test_flag_value: 0
REMARK Model file name(s):
REMARK   /home/achim/xray_data/xiaoqin/9cis/process/refine/9cis_test_001.pdb
REMARK
REMARK ***** REFINEMENT SUMMARY: QUICK FACTS *****
REMARK Start: r_work = 0.1586 r_free = 0.1931 bonds = 0.007 angles = 0.978
REMARK Final: r_work = 0.1651 r_free = 0.1975 bonds = 0.005 angles = 0.841
REMARK *****
REMARK ***** REFINEMENT STATISTICS STEP BY STEP *****
REMARK leading digit, like l_, means number of macro-cycle
REMARK   0 : statistics at the very beginning when nothing is done yet
REMARK   1 s: bulk solvent correction and/or (anisotropic) scaling
REMARK   1 z: refinement of coordinates
REMARK   1 p: refinement of ADPs (Atomic Displacement Parameters)
REMARK   1 t: ordered solvent update (add / remove)
REMARK
REMARK -----
REMARK R-factors, x-ray target values and norm of gradient of x-ray target
REMARK stage  r-work r-free  xray_target_w  xray_target_t
REMARK   0      : 0.2758 0.2848  2.962936e+00  3.076127e+00
REMARK  1_bss: 0.1586 0.1931  2.700979e+00  2.873534e+00
REMARK  1_xyz: 0.1660 0.1996  2.742926e+00  2.900151e+00
REMARK  1_adp: 0.1648 0.1978  2.732830e+00  2.889278e+00
REMARK  1_bss: 0.1651 0.1975  2.733333e+00  2.888987e+00
REMARK
REMARK -----
REMARK stage  k_sol  b_sol  b11  b22  b33  b12  b13  b23
REMARK   0      : 0.000  0.000  0.000  0.000  0.000  0.000  0.000  0.000
REMARK  1_bss: 0.369  59.092  7.410 -3.138 -4.937 -0.000  0.450 -0.000
REMARK  1_xyz: 0.369  59.092  7.410 -3.138 -4.937 -0.000  0.450 -0.000
REMARK  1_adp: 0.369  59.092  7.410 -3.138 -4.937 -0.000  0.450 -0.000
REMARK  1_bss: 0.369  58.870  7.632 -2.917 -4.715 -0.000  0.450 -0.000
REMARK
REMARK -----
REMARK stage  <pher>  fom  alpha  beta
REMARK   0      : 25.794 0.8112 0.0884  180.662
REMARK  1_bss: 19.294 0.8776 0.0910  64.240
REMARK  1_xyz: 20.103 0.8699 0.0935  67.237
REMARK  1_adp: 19.754 0.8733 0.0915  66.465
REMARK  1_bss: 19.752 0.8733 0.0915  66.184
REMARK
REMARK -----
REMARK stage  angl  bond  chir  dihe  plan  repu  geom_target
REMARK   0      : 0.978  0.007  0.062 16.906  0.004  4.109  6.4861e-02
REMARK  1_bss: 0.978  0.007  0.062 16.906  0.004  4.109  6.4861e-02
REMARK  1_xyz: 0.841  0.005  0.055 16.387  0.003  4.111  5.1545e-02
REMARK  1_adp: 0.841  0.005  0.055 16.387  0.003  4.111  5.1545e-02
REMARK  1_bss: 0.841  0.005  0.055 16.387  0.003  4.110  5.1568e-02
REMARK
REMARK -----
REMARK Maximal deviations:
REMARK stage  angl  bond  chir  dihe  plan  repu  |grad|
REMARK   0      : 6.640  0.064  0.212175.026  0.021  2.113  5.6877e-02
REMARK  1_bss: 6.640  0.064  0.212175.026  0.021  2.113  5.6877e-02
REMARK  1_xyz: 6.335  0.045  0.191159.768  0.021  2.330  3.4878e-02
REMARK  1_adp: 6.335  0.045  0.191159.768  0.021  2.330  3.4878e-02
REMARK  1_bss: 6.335  0.045  0.191159.768  0.021  2.330  3.4894e-02
REMARK
REMARK -----
REMARK |-----overall-----|---macromolecule---|-----solvent-----|
REMARK stage  b_max  b_min  b_ave  b_max  b_min  b_ave  b_max  b_min  b_ave
REMARK   0      : 104.64 10.08 32.01 104.64 10.08 30.13 71.56 14.01 43.90

```

REMARK 1\_bss: 104.64 10.08 32.01 104.64 10.08 30.13 71.56 14.01 43.90  
 REMARK 1\_xyz: 114.97 10.26 33.00 114.97 10.26 31.47 69.07 14.32 43.02  
 REMARK 1\_adp: 104.56 11.20 31.81 104.56 11.20 29.99 72.24 14.18 43.75  
 REMARK 1\_bss: 104.34 10.98 31.58 104.34 10.98 29.76 72.02 13.96 43.51

-----  
 REMARK stage Deviation of refined  
 REMARK model from start model  
 REMARK max min mean  
 REMARK 0 : 0.000 0.000 0.000  
 REMARK 1\_bss: 0.000 0.000 0.000  
 REMARK 1\_xyz: 0.148 0.001 0.018  
 REMARK 1\_adp: 0.148 0.001 0.018  
 REMARK 1\_bss: 0.148 0.001 0.018

-----  
 REMARK stage number of ordered solvent  
 REMARK 0 : 327  
 REMARK 1\_bss: 327  
 REMARK 1\_xyz: 316  
 REMARK 1\_adp: 316  
 REMARK 1\_bss: 315

-----  
 REMARK MODEL CONTENT.  
 REMARK ELEMENT ATOM RECORD COUNT OCCUPANCY SUM  
 REMARK C 1338 1338.00  
 REMARK S 8 8.00  
 REMARK O 697 697.00  
 REMARK N 340 340.00  
 REMARK TOTAL 2383 2383.00

-----  
 REMARK r\_free\_flags.md5.hexdigest 4d329d92ca5f17b4668057ad2c5e22d2

REMARK IF THIS FILE IS FOR PDB DEPOSITION: REMOVE ALL FROM THIS LINE UP.  
 REMARK 3

REMARK 3 REFINEMENT.  
 REMARK 3 PROGRAM : PHENIX (phenix.refine)  
 REMARK 3 AUTHORS : Paul Adams, Pavel Afonine, Vincent Chen, Ian  
 REMARK 3 : Davis, Kreshna Gopal, Ralf Grosse-Kunstleve,  
 REMARK 3 : Jeffrey Headd, Li-Wei Hung, Robert  
 REMARK 3 : Immormino, Tom Ioerger, Airlie McCoy, Erik  
 REMARK 3 : McKee, Nigel Moriarty, Reetal Pai, Randy  
 REMARK 3 : Read, Jane Richardson, David Richardson, Tod  
 REMARK 3 : Romo, Jim Sacchettini, Nicholas Sauter,  
 REMARK 3 : Jacob Smith, Laurent Storoni, Tom  
 REMARK 3 : Terwilliger, Peter Zwart

REMARK 3 REFINEMENT TARGET : ML

REMARK 3 DATA USED IN REFINEMENT.  
 REMARK 3 RESOLUTION RANGE HIGH (ANGSTROMS) : 1.896  
 REMARK 3 RESOLUTION RANGE LOW (ANGSTROMS) : 44.745  
 REMARK 3 MIN(FOBS/SIGMA FOBS) : 2.00  
 REMARK 3 COMPLETENESS FOR RANGE (%) : 98.75  
 REMARK 3 NUMBER OF REFLECTIONS : 25013

REMARK 3 FIT TO DATA USED IN REFINEMENT.  
 REMARK 3 R VALUE (WORKING + TEST SET) : 0.1683  
 REMARK 3 R VALUE (WORKING SET) : 0.1651  
 REMARK 3 FREE R VALUE : 0.1975  
 REMARK 3 FREE R VALUE TEST SET SIZE (%) : 10.00  
 REMARK 3 FREE R VALUE TEST SET COUNT : 2502

REMARK 3 FIT TO DATA USED IN REFINEMENT (IN BINS).  
 REMARK 3 BIN RESOLUTION RANGE COMPL. NWORK NFREE RWORK RFREE  
 REMARK 3 1 44.7573 - 4.9663 0.99 1305 146 0.1825 0.1960  
 REMARK 3 2 4.9663 - 3.9426 1.00 1284 142 0.1369 0.1568  
 REMARK 3 3 3.9426 - 3.4445 0.99 1263 140 0.1414 0.1698  
 REMARK 3 4 3.4445 - 3.1296 1.00 1262 141 0.1470 0.1767  
 REMARK 3 5 3.1296 - 2.9053 1.00 1264 140 0.1571 0.2135  
 REMARK 3 6 2.9053 - 2.7341 1.00 1282 143 0.1699 0.1981  
 REMARK 3 7 2.7341 - 2.5972 1.00 1250 139 0.1711 0.2187



REMARK 3 8 2.5972 - 2.4841 1.00 1259 139 0.1773 0.2087  
REMARK 3 9 2.4841 - 2.3885 1.00 1246 139 0.1641 0.2028  
REMARK 3 10 2.3885 - 2.3061 1.00 1275 142 0.1592 0.2009  
REMARK 3 11 2.3061 - 2.2340 1.00 1267 140 0.1725 0.2202  
REMARK 3 12 2.2340 - 2.1701 1.00 1241 138 0.1661 0.2213  
REMARK 3 13 2.1701 - 2.1130 1.00 1252 139 0.1695 0.2155  
REMARK 3 14 2.1130 - 2.0614 1.00 1277 142 0.1723 0.2256  
REMARK 3 15 2.0614 - 2.0146 1.00 1251 139 0.1692 0.2087  
REMARK 3 16 2.0146 - 1.9717 1.00 1263 140 0.1830 0.2107  
REMARK 3 17 1.9717 - 1.9323 1.00 1247 139 0.1972 0.2203  
REMARK 3 18 1.9323 - 1.8958 0.80 1023 114 0.2380 0.2472  
REMARK 3  
REMARK 3 BULK SOLVENT MODELLING.  
REMARK 3 METHOD USED : FLAT BULK SOLVENT MODEL  
REMARK 3 SOLVENT RADIUS : 0.80  
REMARK 3 SHRINKAGE RADIUS : 0.80  
REMARK 3 GRID STEP FACTOR : 4.00  
REMARK 3 K\_SOL : 0.369  
REMARK 3 B\_SOL : 58.870  
REMARK 3  
REMARK 3 ERROR ESTIMATES.  
REMARK 3 COORDINATE ERROR (MAXIMUM-LIKELIHOOD BASED) : 0.20  
REMARK 3 PHASE ERROR (DEGREES, MAXIMUM-LIKELIHOOD BASED) : 19.75  
REMARK 3  
REMARK 3 OVERALL SCALE FACTORS.  
REMARK 3 SCALE = SUM(|F\_OBS|\*|F\_MODEL|)/SUM(|F\_MODEL|\*\*2) : 0.0948  
REMARK 3 ANISOTROPIC SCALE MATRIX ELEMENTS (IN CARTESIAN BASIS).  
REMARK 3 B11 : 7.6317  
REMARK 3 B22 : -2.9166  
REMARK 3 B33 : -4.7151  
REMARK 3 B12 : -0.0000  
REMARK 3 B13 : 0.4498  
REMARK 3 B23 : -0.0000  
REMARK 3  
REMARK 3 R FACTOR FORMULA.  
REMARK 3  $R = \frac{\sum(|F\_OBS| - SCALE * |F\_MODEL|)}{\sum(|F\_OBS|)}$   
REMARK 3  
REMARK 3 TOTAL MODEL STRUCTURE FACTOR (F\_MODEL).  
REMARK 3  $F\_MODEL = FB\_CART * (F\_CALC\_ATOMS + F\_BULK)$   
REMARK 3  $F\_BULK = K\_SOL * EXP(-B\_SOL * S**2 / 4) * F\_MASK$   
REMARK 3  $F\_CALC\_ATOMS =$  ATOMIC MODEL STRUCTURE FACTORS  
REMARK 3  $FB\_CART = EXP(-H(t) * A(-1) * B * A(-1t) * H)$   
REMARK 3  $A =$  orthogonalization matrix,  $H =$  MILLER INDEX  
REMARK 3  $(t) =$  TRANSPOSE,  $(-1) =$  INVERSE  
REMARK 3  
REMARK 3 STRUCTURE FACTORS CALCULATION ALGORITHM : FFT  
REMARK 3  
REMARK 3 DEVIATIONS FROM IDEAL VALUES.  
REMARK 3 RMSD MAX COUNT  
REMARK 3 BOND : 0.005 0.045 2115  
REMARK 3 ANGLE : 0.841 6.335 2855  
REMARK 3 CHIRALITY : 0.055 0.191 300  
REMARK 3 PLANARITY : 0.003 0.021 370  
REMARK 3 DIHEDRAL : 16.387 159.768 795  
REMARK 3 MIN NONBONDED DISTANCE : 2.330  
REMARK 3  
REMARK 3 ATOMIC DISPLACEMENT PARAMETERS.  
REMARK 3 WILSON B : None  
REMARK 3 RMS(B\_ISO\_OR\_EQUIVALENT\_BONDED) : 3.93  
REMARK 3 ATOMS NUMBER OF ATOMS  
REMARK 3 ISO. ANISO.  
REMARK 3 ALL : 2383 2047  
REMARK 3 ALL (NO H) : 2383 2047  
REMARK 3 SOLVENT : 315 0  
REMARK 3 NON-SOLVENT : 2068 2047  
REMARK 3 HYDROGENS : 0 0  
REMARK 3  
REMARK 3 TLS DETAILS.  
REMARK 3 NUMBER OF TLS GROUPS: 7  
REMARK 3 ORIGIN: CENTER OF MASS

```

REMARK 3 TLS GROUP : 1
REMARK 3 SELECTION: (chain A and resid 57:85)
REMARK 3 ORIGIN FOR THE GROUP (A): -14.3369 31.9499 8.9848
REMARK 3 T TENSOR
REMARK 3 T11: 0.2981 T22: 0.1423
REMARK 3 T33: 0.2513 T12: 0.1563
REMARK 3 T13: -0.0870 T23: -0.0356
REMARK 3 L TENSOR
REMARK 3 L11: 0.2863 L22: -0.8070
REMARK 3 L33: 5.1607 L12: 0.8936
REMARK 3 L13: 0.9129 L23: 0.1310
REMARK 3 S TENSOR
REMARK 3 S11: -0.1549 S12: 0.0452 S13: 0.3945
REMARK 3 S21: -0.1084 S22: -0.0993 S23: 0.2382
REMARK 3 S31: -0.8851 S32: -0.2117 S33: 0.2938
REMARK 3 TLS GROUP : 2
REMARK 3 SELECTION: (chain A and resid 86:98)
REMARK 3 ORIGIN FOR THE GROUP (A): -17.1863 23.5800 13.8063
REMARK 3 T TENSOR
REMARK 3 T11: 0.0740 T22: 0.1990
REMARK 3 T33: 0.2120 T12: 0.0922
REMARK 3 T13: -0.0044 T23: -0.0652
REMARK 3 L TENSOR
REMARK 3 L11: 4.3053 L22: 1.6617
REMARK 3 L33: 1.4195 L12: -1.6226
REMARK 3 L13: -0.8597 L23: 0.1731
REMARK 3 S TENSOR
REMARK 3 S11: 0.1595 S12: 0.6543 S13: -0.6978
REMARK 3 S21: 0.0453 S22: 0.0372 S23: 0.4534
REMARK 3 S31: -0.2022 S32: -0.3200 S33: -0.0998
REMARK 3 TLS GROUP : 3
REMARK 3 SELECTION: (chain A and resid 99:143)
REMARK 3 ORIGIN FOR THE GROUP (A): -9.8733 16.4298 12.8980
REMARK 3 T TENSOR
REMARK 3 T11: 0.0475 T22: 0.1173
REMARK 3 T33: 0.0963 T12: 0.0022
REMARK 3 T13: 0.0270 T23: 0.0028
REMARK 3 L TENSOR
REMARK 3 L11: -0.1262 L22: 0.5076
REMARK 3 L33: 1.2756 L12: -0.3005
REMARK 3 L13: 0.4507 L23: 0.1640
REMARK 3 S TENSOR
REMARK 3 S11: 0.0261 S12: -0.0488 S13: -0.0071
REMARK 3 S21: -0.0310 S22: -0.0783 S23: 0.2215
REMARK 3 S31: -0.1067 S32: -0.2687 S33: 0.0112
REMARK 3 TLS GROUP : 4
REMARK 3 SELECTION: (chain A and resid 144:185)
REMARK 3 ORIGIN FOR THE GROUP (A): -3.4660 4.6655 20.5590
REMARK 3 T TENSOR
REMARK 3 T11: 0.1119 T22: 0.0403
REMARK 3 T33: 0.0915 T12: -0.0340
REMARK 3 T13: 0.0134 T23: 0.0140
REMARK 3 L TENSOR
REMARK 3 L11: 1.4353 L22: 1.1464
REMARK 3 L33: 1.9986 L12: 0.1384
REMARK 3 L13: 1.0779 L23: -0.5242
REMARK 3 S TENSOR
REMARK 3 S11: 0.0902 S12: -0.0252 S13: -0.2170
REMARK 3 S21: 0.2103 S22: 0.0469 S23: 0.0364
REMARK 3 S31: 0.2393 S32: -0.0575 S33: -0.1183
REMARK 3 TLS GROUP : 5
REMARK 3 SELECTION: (chain A and resid 186:255)
REMARK 3 ORIGIN FOR THE GROUP (A): 3.3083 7.4464 15.0599
REMARK 3 T TENSOR
REMARK 3 T11: 0.0542 T22: 0.0740
REMARK 3 T33: 0.0744 T12: 0.0077
REMARK 3 T13: 0.0121 T23: -0.0032
REMARK 3 L TENSOR
REMARK 3 L11: 0.4999 L22: 0.6442
REMARK 3 L33: 0.6306 L12: -0.3420

```

```

REMARK 3      L13:   0.4140 L23:  -0.0786
REMARK 3      S TENSOR
REMARK 3      S11:   0.0238 S12:   0.1314 S13:  -0.0075
REMARK 3      S21:   0.0678 S22:  -0.0468 S23:  -0.0139
REMARK 3      S31:   0.0294 S32:   0.0910 S33:   0.0095
REMARK 3      TLS GROUP : 6
REMARK 3      SELECTION: (chain A and resid 256:295)
REMARK 3      ORIGIN FOR THE GROUP (A):   9.1620   8.0125  24.3525
REMARK 3      T TENSOR
REMARK 3      T11:   0.0905 T22:   0.0743
REMARK 3      T33:   0.1118 T12:  -0.0247
REMARK 3      T13:  -0.0222 T23:   0.0155
REMARK 3      L TENSOR
REMARK 3      L11:   0.2191 L22:   1.1090
REMARK 3      L33:   0.3304 L12:  -0.1958
REMARK 3      L13:   0.6117 L23:   0.5279
REMARK 3      S TENSOR
REMARK 3      S11:  -0.0299 S12:   0.0355 S13:   0.0173
REMARK 3      S21:   0.2764 S22:  -0.0170 S23:  -0.2060
REMARK 3      S31:  -0.0232 S32:   0.1604 S33:   0.0406
REMARK 3      TLS GROUP : 7
REMARK 3      SELECTION: (chain A and resid 296:306)
REMARK 3      ORIGIN FOR THE GROUP (A): -11.3359   3.3341  29.3839
REMARK 3      T TENSOR
REMARK 3      T11:   0.1901 T22:   0.1457
REMARK 3      T33:   0.0474 T12:  -0.1286
REMARK 3      T13:   0.2676 T23:   0.1319
REMARK 3      L TENSOR
REMARK 3      L11:   4.2506 L22:   0.6650
REMARK 3      L33:   2.4857 L12:   0.0001
REMARK 3      L13:  -0.6505 L23:  -0.6498
REMARK 3      S TENSOR
REMARK 3      S11:   0.7640 S12:  -0.5752 S13:   0.2772
REMARK 3      S21:   0.2434 S22:  -0.0010 S23:   0.1460
REMARK 3      S31:  -0.2766 S32:  -0.1711 S33:  -0.5849
REMARK 3
CRYST1 87.870  57.918  75.206  90.00 122.88  90.00 C 1 2 1
SCALE1 0.011380 0.000000 0.007356 0.000000
SCALE2 0.000000 0.017266 0.000000 0.000000
SCALE3 0.000000 0.000000 0.015833 0.000000
ATOM 1 N GLU A 57 -16.819 40.185 24.393 1.00 75.40 N
ANISOU 1 N GLU A 57 11136 7693 9821 2413 -810 -1780 N
ATOM 2 CA GLU A 57 -15.592 39.544 24.852 1.00 72.74 C
ANISOU 2 CA GLU A 57 10698 7400 9540 1983 -661 -1653 C
ATOM 3 C GLU A 57 -14.742 39.062 23.678 1.00 63.00 C
ANISOU 3 C GLU A 57 9504 6146 8286 1777 -646 -1452 C
ATOM 4 CB GLU A 57 -15.911 38.389 25.805 1.00 78.38 C
ANISOU 4 CB GLU A 57 10956 8459 10367 1888 -550 -1757 C
ATOM 5 CG GLU A 57 -16.633 38.816 27.074 1.00 86.05 C
ANISOU 5 CG GLU A 57 11845 9496 11353 2033 -553 -1957 C
ATOM 6 CD GLU A 57 -15.791 39.733 27.939 1.00 90.76 C
ANISOU 6 CD GLU A 57 12727 9838 11921 1859 -504 -1926 C
ATOM 7 OE1 GLU A 57 -14.556 39.546 27.976 1.00 91.96 O
ANISOU 7 OE1 GLU A 57 12953 9916 12074 1506 -405 -1759 O
ATOM 8 OE2 GLU A 57 -16.361 40.638 28.584 1.00 92.83 O
ANISOU 8 OE2 GLU A 57 13139 9993 12138 2076 -565 -2069 O
ATOM 9 O GLU A 57 -15.256 38.802 22.588 1.00 60.95 O
ANISOU 9 O GLU A 57 9206 5934 8019 1940 -721 -1429 O
ATOM 10 N THR A 58 -13.439 38.949 23.907 1.00 54.81 N
ANISOU 10 N THR A 58 8533 5068 7223 1419 -549 -1311 N
ATOM 11 CA THR A 58 -12.508 38.626 22.835 1.00 55.22 C
ANISOU 11 CA THR A 58 8646 5120 7215 1215 -541 -1124 C
ATOM 12 C THR A 58 -12.785 37.266 22.188 1.00 45.30 C
ANISOU 12 C THR A 58 7039 4131 6044 1247 -505 -1111 C
ATOM 13 CB THR A 58 -11.039 38.682 23.314 1.00 61.44 C
ANISOU 13 CB THR A 58 9515 5906 7923 821 -431 -985 C
ATOM 14 OG1 THR A 58 -10.713 37.480 24.024 1.00 64.99 O
ANISOU 14 OG1 THR A 58 9592 6631 8470 676 -288 -998 O
ATOM 15 CG2 THR A 58 -10.820 39.886 24.217 1.00 59.81 C
ANISOU 15 CG2 THR A 58 9626 5467 7631 748 -440 -1013 C

```

|        |    |     |     |   |    |         |        |        |      |       |       |   |
|--------|----|-----|-----|---|----|---------|--------|--------|------|-------|-------|---|
| ATOM   | 16 | O   | THR | A | 58 | -12.669 | 37.129 | 20.971 | 1.00 | 44.36 | O     |   |
| ANISOU | 16 | O   | THR | A | 58 | 6975    | 3996   | 5884   | 1267 | -563  | -1015 | O |
| ATOM   | 17 | N   | ARG | A | 59 | -13.156 | 36.271 | 22.991 | 1.00 | 40.26 | N     |   |
| ANISOU | 17 | N   | ARG | A | 59 | 6061    | 3728   | 5507   | 1237 | -418  | -1208 | N |
| ATOM   | 18 | CA  | ARG | A | 59 | -13.359 | 34.914 | 22.468 | 1.00 | 40.51 | C     |   |
| ANISOU | 18 | CA  | ARG | A | 59 | 5806    | 3998   | 5589   | 1228 | -384  | -1192 | C |
| ATOM   | 19 | CB  | ARG | A | 59 | -13.629 | 33.916 | 23.598 | 1.00 | 38.68 | C     |   |
| ANISOU | 19 | CB  | ARG | A | 59 | 5266    | 3994   | 5436   | 1149 | -296  | -1297 | C |
| ATOM   | 20 | CG  | ARG | A | 59 | -12.392 | 33.442 | 24.330 | 1.00 | 37.27 | C     |   |
| ANISOU | 20 | CG  | ARG | A | 59 | 5030    | 3867   | 5264   | 856  | -171  | -1213 | C |
| ATOM   | 21 | CD  | ARG | A | 59 | -12.746 | 32.392 | 25.377 | 1.00 | 33.83 | C     |   |
| ANISOU | 21 | CD  | ARG | A | 59 | 4305    | 3647   | 4902   | 781  | -106  | -1318 | C |
| ATOM   | 22 | NE  | ARG | A | 59 | -11.562 | 31.936 | 26.092 | 1.00 | 33.14 | N     |   |
| ANISOU | 22 | NE  | ARG | A | 59 | 4164    | 3614   | 4815   | 522  | 11    | -1237 | N |
| ATOM   | 23 | CZ  | ARG | A | 59 | -11.507 | 30.830 | 26.826 | 1.00 | 30.01 | C     |   |
| ANISOU | 23 | CZ  | ARG | A | 59 | 3551    | 3392   | 4459   | 406  | 71    | -1276 | C |
| ATOM   | 24 | NH1 | ARG | A | 59 | -12.575 | 30.056 | 26.951 | 1.00 | 29.09 | N     |   |
| ANISOU | 24 | NH1 | ARG | A | 59 | 3261    | 3419   | 4374   | 487  | 19    | -1394 | N |
| ATOM   | 25 | NH2 | ARG | A | 59 | -10.376 | 30.498 | 27.430 | 1.00 | 25.77 | N     |   |
| ANISOU | 25 | NH2 | ARG | A | 59 | 2981    | 2904   | 3906   | 196  | 174   | -1193 | N |
| ATOM   | 26 | C   | ARG | A | 59 | -14.488 | 34.846 | 21.447 | 1.00 | 39.11 | C     |   |
| ANISOU | 26 | C   | ARG | A | 59 | 5598    | 3856   | 5406   | 1498 | -491  | -1239 | C |
| ATOM   | 27 | O   | ARG | A | 59 | -14.334 | 34.268 | 20.370 | 1.00 | 34.94 | O     |   |
| ANISOU | 27 | O   | ARG | A | 59 | 5035    | 3380   | 4860   | 1479 | -505  | -1145 | O |
| ATOM   | 28 | N   | GLU | A | 60 | -15.624 | 35.442 | 21.790 | 1.00 | 40.45 | N     |   |
| ANISOU | 28 | N   | GLU | A | 60 | 5773    | 4021   | 5576   | 1758 | -566  | -1387 | N |
| ATOM   | 29 | CA  | GLU | A | 60 | -16.795 | 35.408 | 20.922 | 1.00 | 48.24 | C     |   |
| ANISOU | 29 | CA  | GLU | A | 60 | 6700    | 5096   | 6532   | 2035 | -663  | -1445 | C |
| ATOM   | 30 | CB  | GLU | A | 60 | -18.018 | 35.969 | 21.652 | 1.00 | 61.45 | C     |   |
| ANISOU | 30 | CB  | GLU | A | 60 | 8311    | 6856   | 8182   | 2322 | -727  | -1642 | C |
| ATOM   | 31 | CG  | GLU | A | 60 | -18.421 | 35.176 | 22.893 | 1.00 | 70.46 | C     |   |
| ANISOU | 31 | CG  | GLU | A | 60 | 9131    | 8279   | 9363   | 2231 | -651  | -1778 | C |
| ATOM   | 32 | CD  | GLU | A | 60 | -17.446 | 35.349 | 24.048 | 1.00 | 77.03 | C     |   |
| ANISOU | 32 | CD  | GLU | A | 60 | 10016   | 8997   | 10254  | 1988 | -557  | -1764 | C |
| ATOM   | 33 | OE1 | GLU | A | 60 | -16.629 | 36.290 | 24.002 | 1.00 | 79.62 | O     |   |
| ANISOU | 33 | OE1 | GLU | A | 60 | 10651   | 9034   | 10566  | 1933 | -562  | -1678 | O |
| ATOM   | 34 | OE2 | GLU | A | 60 | -17.500 | 34.546 | 25.003 | 1.00 | 78.06 | O     |   |
| ANISOU | 34 | OE2 | GLU | A | 60 | 9891    | 9339   | 10431  | 1829 | -482  | -1835 | O |
| ATOM   | 35 | C   | GLU | A | 60 | -16.544 | 36.175 | 19.626 | 1.00 | 44.55 | C     |   |
| ANISOU | 35 | C   | GLU | A | 60 | 6523    | 4397   | 6005   | 2118 | -759  | -1323 | C |
| ATOM   | 36 | O   | GLU | A | 60 | -17.023 | 35.788 | 18.558 | 1.00 | 47.09 | O     |   |
| ANISOU | 36 | O   | GLU | A | 60 | 6778    | 4803   | 6312   | 2217 | -805  | -1285 | O |
| ATOM   | 37 | N   | GLU | A | 61 | -15.789 | 37.264 | 19.732 | 1.00 | 41.32 | N     |   |
| ANISOU | 37 | N   | GLU | A | 61 | 6451    | 3701   | 5546   | 2048 | -794  | -1259 | N |
| ATOM   | 38 | CA  | GLU | A | 61 | -15.412 | 38.056 | 18.568 | 1.00 | 47.29 | C     |   |
| ANISOU | 38 | CA  | GLU | A | 61 | 7530    | 4219   | 6220   | 2060 | -900  | -1132 | C |
| ATOM   | 39 | CB  | GLU | A | 61 | -14.754 | 39.365 | 19.006 | 1.00 | 58.59 | C     |   |
| ANISOU | 39 | CB  | GLU | A | 61 | 9374    | 5333   | 7556   | 1979 | -953  | -1098 | C |
| ATOM   | 40 | CG  | GLU | A | 61 | -14.090 | 40.131 | 17.876 | 1.00 | 70.52 | C     |   |
| ANISOU | 40 | CG  | GLU | A | 61 | 11251   | 6601   | 8944   | 1870 | -1061 | -941  | C |
| ATOM   | 41 | CD  | GLU | A | 61 | -13.213 | 41.264 | 18.376 | 1.00 | 80.12 | C     |   |
| ANISOU | 41 | CD  | GLU | A | 61 | 12885   | 7535   | 10022  | 1668 | -1096 | -879  | C |
| ATOM   | 42 | OE1 | GLU | A | 61 | -13.315 | 41.616 | 19.571 | 1.00 | 82.45 | O     |   |
| ANISOU | 42 | OE1 | GLU | A | 61 | 13223   | 7778   | 10328  | 1694 | -1051 | -979  | O |
| ATOM   | 43 | OE2 | GLU | A | 61 | -12.420 | 41.800 | 17.573 | 1.00 | 83.52 | O     |   |
| ANISOU | 43 | OE2 | GLU | A | 61 | 13610   | 7810   | 10316  | 1459 | -1171 | -730  | O |
| ATOM   | 44 | C   | GLU | A | 61 | -14.465 | 37.270 | 17.666 | 1.00 | 41.08 | C     |   |
| ANISOU | 44 | C   | GLU | A | 61 | 6665    | 3513   | 5430   | 1797 | -847  | -965  | C |
| ATOM   | 45 | O   | GLU | A | 61 | -14.606 | 37.276 | 16.441 | 1.00 | 38.36 | O     |   |
| ANISOU | 45 | O   | GLU | A | 61 | 6378    | 3142   | 5057   | 1855 | -921  | -889  | O |
| ATOM   | 46 | N   | ALA | A | 62 | -13.498 | 36.596 | 18.281 | 1.00 | 37.32 | N     |   |
| ANISOU | 46 | N   | ALA | A | 62 | 6054    | 3154   | 4974   | 1522 | -721  | -914  | N |
| ATOM   | 47 | CA  | ALA | A | 62 | -12.536 | 35.786 | 17.540 | 1.00 | 34.79 | C     |   |
| ANISOU | 47 | CA  | ALA | A | 62 | 5637    | 2953   | 4628   | 1299 | -665  | -773  | C |
| ATOM   | 48 | CB  | ALA | A | 62 | -11.465 | 35.244 | 18.480 | 1.00 | 35.12 | C     |   |
| ANISOU | 48 | CB  | ALA | A | 62 | 5563    | 3117   | 4665   | 1037 | -530  | -737  | C |
| ATOM   | 49 | C   | ALA | A | 62 | -13.222 | 34.647 | 16.796 | 1.00 | 37.15 | C     |   |
| ANISOU | 49 | C   | ALA | A | 62 | 5677    | 3452   | 4988   | 1415 | -657  | -791  | C |
| ATOM   | 50 | O   | ALA | A | 62 | -12.898 | 34.361 | 15.640 | 1.00 | 33.74 | O     |   |
| ANISOU | 50 | O   | ALA | A | 62 | 5258    | 3044   | 4520   | 1368 | -686  | -686  | O |

|        |    |     |     |   |    |         |        |        |      |       |       |   |
|--------|----|-----|-----|---|----|---------|--------|--------|------|-------|-------|---|
| ATOM   | 51 | N   | VAL | A | 63 | -14.168 | 33.993 | 17.464 | 1.00 | 36.76 | N     |   |
| ANISOU | 51 | N   | VAL | A | 63 | 5396    | 3561   | 5011   | 1543 | -621  | -924  | N |
| ATOM   | 52 | CA  | VAL | A | 63 | -14.923 | 32.907 | 16.849 | 1.00 | 35.01 | C     |   |
| ANISOU | 52 | CA  | VAL | A | 63 | 4950    | 3542   | 4811   | 1625 | -616  | -947  | C |
| ATOM   | 53 | CB  | VAL | A | 63 | -15.876 | 32.234 | 17.854 | 1.00 | 36.12 | C     |   |
| ANISOU | 53 | CB  | VAL | A | 63 | 4849    | 3889   | 4986   | 1692 | -577  | -1101 | C |
| ATOM   | 54 | CG1 | VAL | A | 63 | -16.868 | 31.346 | 17.125 | 1.00 | 35.03 | C     |   |
| ANISOU | 54 | CG1 | VAL | A | 63 | 4536    | 3957   | 4818   | 1785 | -600  | -1128 | C |
| ATOM   | 55 | CG2 | VAL | A | 63 | -15.086 | 31.439 | 18.881 | 1.00 | 33.83 | C     |   |
| ANISOU | 55 | CG2 | VAL | A | 63 | 4442    | 3684   | 4727   | 1466 | -468  | -1103 | C |
| ATOM   | 56 | C   | VAL | A | 63 | -15.732 | 33.430 | 15.675 | 1.00 | 37.05 | C     |   |
| ANISOU | 56 | C   | VAL | A | 63 | 5299    | 3739   | 5038   | 1833 | -727  | -932  | C |
| ATOM   | 57 | O   | VAL | A | 63 | -15.782 | 32.809 | 14.614 | 1.00 | 33.46 | O     |   |
| ANISOU | 57 | O   | VAL | A | 63 | 4780    | 3364   | 4570   | 1816 | -734  | -857  | O |
| ATOM   | 58 | N   | ARG | A | 64 | -16.361 | 34.586 | 15.873 | 1.00 | 40.33 | N     |   |
| ANISOU | 58 | N   | ARG | A | 64 | 5877    | 4012   | 5433   | 2040 | -816  | -1005 | N |
| ATOM   | 59 | CA  | ARG | A | 64 | -17.122 | 35.233 | 14.815 | 1.00 | 41.37 | C     |   |
| ANISOU | 59 | CA  | ARG | A | 64 | 6132    | 4065   | 5522   | 2269 | -936  | -993  | C |
| ATOM   | 60 | CB  | ARG | A | 64 | -17.789 | 36.516 | 15.323 | 1.00 | 44.05 | C     |   |
| ANISOU | 60 | CB  | ARG | A | 64 | 6676    | 4241   | 5821   | 2537 | -1037 | -1103 | C |
| ATOM   | 61 | CG  | ARG | A | 64 | -18.408 | 37.359 | 14.212 | 1.00 | 48.94 | C     |   |
| ANISOU | 61 | CG  | ARG | A | 64 | 7500    | 4720   | 6376   | 2785 | -1181 | -1075 | C |
| ATOM   | 62 | CD  | ARG | A | 64 | -19.073 | 38.621 | 14.752 | 1.00 | 62.28 | C     |   |
| ANISOU | 62 | CD  | ARG | A | 64 | 9430    | 6234   | 7999   | 3099 | -1295 | -1198 | C |
| ATOM   | 63 | NE  | ARG | A | 64 | -18.124 | 39.485 | 15.448 | 1.00 | 71.11 | N     |   |
| ANISOU | 63 | NE  | ARG | A | 64 | 10872   | 7055   | 9091   | 2950 | -1308 | -1170 | N |
| ATOM   | 64 | CZ  | ARG | A | 64 | -17.250 | 40.280 | 14.839 | 1.00 | 76.27 | C     |   |
| ANISOU | 64 | CZ  | ARG | A | 64 | 11901   | 7405   | 9674   | 2795 | -1388 | -1033 | C |
| ATOM   | 65 | NH1 | ARG | A | 64 | -17.200 | 40.323 | 13.513 | 1.00 | 74.50 | N     |   |
| ANISOU | 65 | NH1 | ARG | A | 64 | 11763   | 7126   | 9419   | 2780 | -1467 | -917  | N |
| ATOM   | 66 | NH2 | ARG | A | 64 | -16.423 | 41.029 | 15.556 | 1.00 | 78.58 | N     |   |
| ANISOU | 66 | NH2 | ARG | A | 64 | 12487   | 7463   | 9907   | 2625 | -1392 | -1010 | N |
| ATOM   | 67 | C   | ARG | A | 64 | -16.238 | 35.557 | 13.619 | 1.00 | 38.51 | C     |   |
| ANISOU | 67 | C   | ARG | A | 64 | 5976    | 3532   | 5125   | 2128 | -986  | -823  | C |
| ATOM   | 68 | O   | ARG | A | 64 | -16.612 | 35.302 | 12.477 | 1.00 | 33.53 | O     |   |
| ANISOU | 68 | O   | ARG | A | 64 | 5303    | 2953   | 4483   | 2189 | -1029 | -766  | O |
| ATOM   | 69 | N   | GLU | A | 65 | -15.071 | 36.134 | 13.885 | 1.00 | 35.08 | N     |   |
| ANISOU | 69 | N   | GLU | A | 65 | 5759    | 2920   | 4651   | 1917 | -982  | -743  | N |
| ATOM   | 70 | CA  | GLU | A | 65 | -14.149 | 36.504 | 12.818 | 1.00 | 37.42 | C     |   |
| ANISOU | 70 | CA  | GLU | A | 65 | 6254    | 3093   | 4872   | 1735 | -1040 | -584  | C |
| ATOM   | 71 | CB  | GLU | A | 65 | -12.929 | 37.234 | 13.380 | 1.00 | 41.50 | C     |   |
| ANISOU | 71 | CB  | GLU | A | 65 | 7015    | 3458   | 5297   | 1481 | -1034 | -514  | C |
| ATOM   | 72 | CG  | GLU | A | 65 | -13.240 | 38.599 | 13.970 | 1.00 | 51.13 | C     |   |
| ANISOU | 72 | CG  | GLU | A | 65 | 8577    | 4396   | 6455   | 1600 | -1133 | -574  | C |
| ATOM   | 73 | CD  | GLU | A | 65 | -11.988 | 39.410 | 14.249 | 1.00 | 57.41 | C     |   |
| ANISOU | 73 | CD  | GLU | A | 65 | 9681    | 5028   | 7103   | 1290 | -1150 | -469  | C |
| ATOM   | 74 | OE1 | GLU | A | 65 | -10.899 | 38.998 | 13.792 | 1.00 | 54.25 | O     |   |
| ANISOU | 74 | OE1 | GLU | A | 65 | 9224    | 4757   | 6630   | 996  | -1104 | -342  | O |
| ATOM   | 75 | OE2 | GLU | A | 65 | -12.092 | 40.461 | 14.919 | 1.00 | 64.15 | O     |   |
| ANISOU | 75 | OE2 | GLU | A | 65 | 10842   | 5643   | 7888   | 1338 | -1212 | -516  | O |
| ATOM   | 76 | C   | GLU | A | 65 | -13.709 | 35.278 | 12.019 | 1.00 | 33.80 | C     |   |
| ANISOU | 76 | C   | GLU | A | 65 | 5557    | 2851   | 4435   | 1590 | -967  | -498  | C |
| ATOM   | 77 | O   | GLU | A | 65 | -13.653 | 35.311 | 10.791 | 1.00 | 29.96 | O     |   |
| ANISOU | 77 | O   | GLU | A | 65 | 5118    | 2349   | 3916   | 1572 | -1033 | -408  | O |
| ATOM   | 78 | N   | LEU | A | 66 | -13.401 | 34.197 | 12.725 | 1.00 | 32.22 | N     |   |
| ANISOU | 78 | N   | LEU | A | 66 | 5117    | 2846   | 4280   | 1492 | -839  | -531  | N |
| ATOM   | 79 | CA  | LEU | A | 66 | -13.009 | 32.954 | 12.067 | 1.00 | 31.56 | C     |   |
| ANISOU | 79 | CA  | LEU | A | 66 | 4834    | 2958   | 4198   | 1389 | -772  | -467  | C |
| ATOM   | 80 | CB  | LEU | A | 66 | -12.644 | 31.886 | 13.096 | 1.00 | 26.29 | C     |   |
| ANISOU | 80 | CB  | LEU | A | 66 | 3969    | 2459   | 3561   | 1297 | -646  | -518  | C |
| ATOM   | 81 | CG  | LEU | A | 66 | -12.297 | 30.507 | 12.527 | 1.00 | 25.11 | C     |   |
| ANISOU | 81 | CG  | LEU | A | 66 | 3650    | 2495   | 3394   | 1230 | -584  | -472  | C |
| ATOM   | 82 | CD1 | LEU | A | 66 | -11.301 | 30.618 | 11.380 | 1.00 | 21.77 | C     |   |
| ANISOU | 82 | CD1 | LEU | A | 66 | 3305    | 2079   | 2887   | 1110 | -615  | -337  | C |
| ATOM   | 83 | CD2 | LEU | A | 66 | -11.759 | 29.593 | 13.628 | 1.00 | 22.78 | C     |   |
| ANISOU | 83 | CD2 | LEU | A | 66 | 3229    | 2324   | 3104   | 1134 | -478  | -513  | C |
| ATOM   | 84 | C   | LEU | A | 66 | -14.124 | 32.455 | 11.154 | 1.00 | 33.83 | C     |   |
| ANISOU | 84 | C   | LEU | A | 66 | 5002    | 3331   | 4519   | 1559 | -808  | -488  | C |
| ATOM   | 85 | O   | LEU | A | 66 | -13.881 | 32.085 | 10.007 | 1.00 | 35.18 | O     |   |
| ANISOU | 85 | O   | LEU | A | 66 | 5155    | 3547   | 4665   | 1504 | -827  | -396  | O |

|        |     |     |     |   |    |         |        |        |      |       |       |   |
|--------|-----|-----|-----|---|----|---------|--------|--------|------|-------|-------|---|
| ATOM   | 86  | N   | GLN | A | 67 | -15.347 | 32.450 | 11.672 | 1.00 | 35.67 | N     |   |
| ANISOU | 86  | N   | GLN | A | 67 | 5144    | 3617   | 4790   | 1755 | -817  | -610  | N |
| ATOM   | 87  | CA  | GLN | A | 67 | -16.509 | 32.051 | 10.890 | 1.00 | 35.84 | C     |   |
| ANISOU | 87  | CA  | GLN | A | 67 | 5043    | 3765   | 4808   | 1913 | -849  | -635  | C |
| ATOM   | 88  | CB  | GLN | A | 67 | -17.776 | 32.116 | 11.748 | 1.00 | 34.79 | C     |   |
| ANISOU | 88  | CB  | GLN | A | 67 | 4788    | 3758   | 4674   | 2113 | -854  | -790  | C |
| ATOM   | 89  | CG  | GLN | A | 67 | -17.917 | 30.942 | 12.703 | 1.00 | 37.53 | C     |   |
| ANISOU | 89  | CG  | GLN | A | 67 | 4917    | 4319   | 5024   | 2005 | -755  | -869  | C |
| ATOM   | 90  | CD  | GLN | A | 67 | -19.000 | 31.150 | 13.739 | 1.00 | 43.18 | C     |   |
| ANISOU | 90  | CD  | GLN | A | 67 | 5512    | 5178   | 5718   | 2161 | -768  | -1033 | C |
| ATOM   | 91  | OE1 | GLN | A | 67 | -19.272 | 32.277 | 14.152 | 1.00 | 48.56 | O     |   |
| ANISOU | 91  | OE1 | GLN | A | 67 | 6308    | 5740   | 6403   | 2335 | -831  | -1099 | O |
| ATOM   | 92  | NE2 | GLN | A | 67 | -19.620 | 30.060 | 14.175 | 1.00 | 43.05 | N     |   |
| ANISOU | 92  | NE2 | GLN | A | 67 | 5279    | 5427   | 5652   | 2091 | -719  | -1104 | N |
| ATOM   | 93  | C   | GLN | A | 67 | -16.651 | 32.917 | 9.639  | 1.00 | 35.52 | C     |   |
| ANISOU | 93  | C   | GLN | A | 67 | 5173    | 3581   | 4742   | 1998 | -961  | -550  | C |
| ATOM   | 94  | O   | GLN | A | 67 | -16.912 | 32.408 | 8.549  | 1.00 | 35.77 | O     |   |
| ANISOU | 94  | O   | GLN | A | 67 | 5125    | 3701   | 4763   | 1992 | -968  | -484  | O |
| ATOM   | 95  | N   | GLU | A | 68 | -16.463 | 34.225 | 9.799  | 1.00 | 35.03 | N     |   |
| ANISOU | 95  | N   | GLU | A | 68 | 5367    | 3284   | 4658   | 2062 | -1054 | -547  | N |
| ATOM   | 96  | CA  | GLU | A | 68 | -16.549 | 35.149 | 8.671  | 1.00 | 38.66 | C     |   |
| ANISOU | 96  | CA  | GLU | A | 68 | 6047    | 3568   | 5076   | 2128 | -1185 | -465  | C |
| ATOM   | 97  | CB  | GLU | A | 68 | -16.453 | 36.603 | 9.151  | 1.00 | 41.39 | C     |   |
| ANISOU | 97  | CB  | GLU | A | 68 | 6730    | 3627   | 5368   | 2220 | -1298 | -493  | C |
| ATOM   | 98  | CG  | GLU | A | 68 | -17.619 | 37.031 | 10.033 | 1.00 | 46.36 | C     |   |
| ANISOU | 98  | CG  | GLU | A | 68 | 7341    | 4269   | 6003   | 2541 | -1323 | -656  | C |
| ATOM   | 99  | CD  | GLU | A | 68 | -17.405 | 38.387 | 10.698 | 1.00 | 54.38 | C     |   |
| ANISOU | 99  | CD  | GLU | A | 68 | 8722    | 4984   | 6956   | 2623 | -1422 | -696  | C |
| ATOM   | 100 | OE1 | GLU | A | 68 | -16.295 | 38.948 | 10.581 | 1.00 | 57.22 | O     |   |
| ANISOU | 100 | OE1 | GLU | A | 68 | 9349    | 5133   | 7258   | 2378 | -1459 | -590  | O |
| ATOM   | 101 | OE2 | GLU | A | 68 | -18.353 | 38.887 | 11.342 | 1.00 | 51.58 | O     |   |
| ANISOU | 101 | OE2 | GLU | A | 68 | 8393    | 4621   | 6583   | 2927 | -1467 | -836  | O |
| ATOM   | 102 | C   | GLU | A | 68 | -15.474 | 34.843 | 7.628  | 1.00 | 37.57 | C     |   |
| ANISOU | 102 | C   | GLU | A | 68 | 5940    | 3425   | 4911   | 1869 | -1186 | -312  | C |
| ATOM   | 103 | O   | GLU | A | 68 | -15.742 | 34.857 | 6.426  | 1.00 | 37.57 | O     |   |
| ANISOU | 103 | O   | GLU | A | 68 | 5944    | 3429   | 4900   | 1890 | -1247 | -240  | O |
| ATOM   | 104 | N   | MET | A | 69 | -14.265 | 34.551 | 8.093  | 1.00 | 33.99 | N     |   |
| ANISOU | 104 | N   | MET | A | 69 | 5487    | 2995   | 4431   | 1628 | -1116 | -268  | N |
| ATOM   | 105 | CA  | MET | A | 69 | -13.174 | 34.200 | 7.193  | 1.00 | 30.98 | C     |   |
| ANISOU | 105 | CA  | MET | A | 69 | 5098    | 2680   | 3992   | 1387 | -1112 | -139  | C |
| ATOM   | 106 | CB  | MET | A | 69 | -11.860 | 34.062 | 7.962  | 1.00 | 29.04 | C     |   |
| ANISOU | 106 | CB  | MET | A | 69 | 4864    | 2489   | 3680   | 1157 | -1039 | -110  | C |
| ATOM   | 107 | CG  | MET | A | 69 | -10.676 | 33.711 | 7.083  | 1.00 | 29.44 | C     |   |
| ANISOU | 107 | CG  | MET | A | 69 | 4882    | 2677   | 3628   | 921  | -1037 | 11    | C |
| ATOM   | 108 | SD  | MET | A | 69 | -9.088  | 33.911 | 7.915  | 1.00 | 31.70 | S     |   |
| ANISOU | 108 | SD  | MET | A | 69 | 5225    | 3056   | 3764   | 641  | -981  | 61    | S |
| ATOM   | 109 | CE  | MET | A | 69 | -9.100  | 35.673 | 8.264  | 1.00 | 24.92 | C     |   |
| ANISOU | 109 | CE  | MET | A | 69 | 4765    | 1887   | 2815   | 568  | -1114 | 81    | C |
| ATOM   | 110 | C   | MET | A | 69 | -13.494 | 32.913 | 6.438  | 1.00 | 32.82 | C     |   |
| ANISOU | 110 | C   | MET | A | 69 | 5074    | 3127   | 4267   | 1406 | -1043 | -123  | C |
| ATOM   | 111 | O   | MET | A | 69 | -13.260 | 32.810 | 5.234  | 1.00 | 33.94 | O     |   |
| ANISOU | 111 | O   | MET | A | 69 | 5215    | 3302   | 4380   | 1329 | -1087 | -31   | O |
| ATOM   | 112 | N   | VAL | A | 70 | -14.038 | 31.931 | 7.148  | 1.00 | 33.71 | N     |   |
| ANISOU | 112 | N   | VAL | A | 70 | 4987    | 3387   | 4435   | 1489 | -940  | -213  | N |
| ATOM   | 113 | CA  | VAL | A | 70 | -14.475 | 30.694 | 6.511  | 1.00 | 31.77 | C     |   |
| ANISOU | 113 | CA  | VAL | A | 70 | 4544    | 3326   | 4201   | 1503 | -880  | -206  | C |
| ATOM   | 114 | CB  | VAL | A | 70 | -15.130 | 29.731 | 7.530  | 1.00 | 27.92 | C     |   |
| ANISOU | 114 | CB  | VAL | A | 70 | 3891    | 2980   | 3737   | 1566 | -788  | -318  | C |
| ATOM   | 115 | CG1 | VAL | A | 70 | -15.818 | 28.581 | 6.817  | 1.00 | 29.48 | C     |   |
| ANISOU | 115 | CG1 | VAL | A | 70 | 3944    | 3348   | 3909   | 1577 | -749  | -310  | C |
| ATOM   | 116 | CG2 | VAL | A | 70 | -14.084 | 29.212 | 8.509  | 1.00 | 26.25 | C     |   |
| ANISOU | 116 | CG2 | VAL | A | 70 | 3659    | 2803   | 3514   | 1432 | -707  | -333  | C |
| ATOM   | 117 | C   | VAL | A | 70 | -15.431 | 30.985 | 5.344  | 1.00 | 32.28 | C     |   |
| ANISOU | 117 | C   | VAL | A | 70 | 4611    | 3381   | 4274   | 1620 | -956  | -171  | C |
| ATOM   | 118 | O   | VAL | A | 70 | -15.280 | 30.436 | 4.252  | 1.00 | 30.81 | O     |   |
| ANISOU | 118 | O   | VAL | A | 70 | 4364    | 3272   | 4070   | 1545 | -952  | -91   | O |
| ATOM   | 119 | N   | GLN | A | 71 | -16.401 | 31.866 | 5.574  | 1.00 | 34.04 | N     |   |
| ANISOU | 119 | N   | GLN | A | 71 | 4906    | 3518   | 4511   | 1815 | -1026 | -232  | N |
| ATOM   | 120 | CA  | GLN | A | 71 | -17.359 | 32.234 | 4.524  | 1.00 | 38.24 | C     |   |
| ANISOU | 120 | CA  | GLN | A | 71 | 5442    | 4053   | 5036   | 1958 | -1103 | -202  | C |

|        |     |     |     |   |    |         |        |        |      |       |      |   |
|--------|-----|-----|-----|---|----|---------|--------|--------|------|-------|------|---|
| ATOM   | 121 | CB  | GLN | A | 71 | -18.548 | 33.001 | 5.113  | 1.00 | 42.52 | C    |   |
| ANISOU | 121 | CB  | GLN | A | 71 | 6014    | 4574   | 5566   | 2239 | -1161 | -313 | C |
| ATOM   | 122 | CG  | GLN | A | 71 | -19.461 | 32.150 | 5.981  | 1.00 | 50.86 | C    |   |
| ANISOU | 122 | CG  | GLN | A | 71 | 6834    | 5883   | 6606   | 2329 | -1070 | -435 | C |
| ATOM   | 123 | CD  | GLN | A | 71 | -19.976 | 30.917 | 5.256  | 1.00 | 52.73 | C    |   |
| ANISOU | 123 | CD  | GLN | A | 71 | 6859    | 6370   | 6807   | 2250 | -996  | -398 | C |
| ATOM   | 124 | OE1 | GLN | A | 71 | -20.422 | 30.996 | 4.110  | 1.00 | 55.24 | O    |   |
| ANISOU | 124 | OE1 | GLN | A | 71 | 7161    | 6725   | 7103   | 2289 | -1034 | -326 | O |
| ATOM   | 125 | NE2 | GLN | A | 71 | -19.923 | 29.769 | 5.927  | 1.00 | 47.67 | N    |   |
| ANISOU | 125 | NE2 | GLN | A | 71 | 6075    | 5893   | 6143   | 2124 | -895  | -446 | N |
| ATOM   | 126 | C   | GLN | A | 71 | -16.712 | 33.045 | 3.402  | 1.00 | 41.01 | C    |   |
| ANISOU | 126 | C   | GLN | A | 71 | 5983    | 4233   | 5367   | 1861 | -1213 | -78  | C |
| ATOM   | 127 | O   | GLN | A | 71 | -16.943 | 32.783 | 2.220  | 1.00 | 43.85 | O    |   |
| ANISOU | 127 | O   | GLN | A | 71 | 6282    | 4655   | 5724   | 1832 | -1235 | -1   | O |
| ATOM   | 128 | N   | ALA | A | 72 | -15.904 | 34.029 | 3.779  | 1.00 | 38.62 | N    |   |
| ANISOU | 128 | N   | ALA | A | 72 | 5918    | 3725   | 5031   | 1782 | -1287 | -57  | N |
| ATOM   | 129 | CA  | ALA | A | 72 | -15.241 | 34.885 | 2.807  | 1.00 | 40.58 | C    |   |
| ANISOU | 129 | CA  | ALA | A | 72 | 6386    | 3810   | 5220   | 1641 | -1414 | 60   | C |
| ATOM   | 130 | CB  | ALA | A | 72 | -14.401 | 35.941 | 3.512  | 1.00 | 41.84 | C    |   |
| ANISOU | 130 | CB  | ALA | A | 72 | 6836    | 3758   | 5302   | 1529 | -1486 | 67   | C |
| ATOM   | 131 | C   | ALA | A | 72 | -14.385 | 34.060 | 1.852  | 1.00 | 39.74 | C    |   |
| ANISOU | 131 | C   | ALA | A | 72 | 6143    | 3864   | 5094   | 1401 | -1370 | 162  | C |
| ATOM   | 132 | O   | ALA | A | 72 | -14.458 | 34.227 | 0.635  | 1.00 | 35.86 | O    |   |
| ANISOU | 132 | O   | ALA | A | 72 | 5672    | 3364   | 4587   | 1347 | -1446 | 247  | O |
| ATOM   | 133 | N   | GLN | A | 73 | -13.583 | 33.159 | 2.407  | 1.00 | 35.76 | N    |   |
| ANISOU | 133 | N   | GLN | A | 73 | 5495    | 3513   | 4579   | 1271 | -1253 | 148  | N |
| ATOM   | 134 | CA  | GLN | A | 73 | -12.705 | 32.324 | 1.594  | 1.00 | 37.56 | C    |   |
| ANISOU | 134 | CA  | GLN | A | 73 | 5590    | 3919   | 4762   | 1082 | -1210 | 226  | C |
| ATOM   | 135 | CB  | GLN | A | 73 | -11.722 | 31.556 | 2.481  | 1.00 | 34.15 | C    |   |
| ANISOU | 135 | CB  | GLN | A | 73 | 5060    | 3629   | 4287   | 983  | -1098 | 195  | C |
| ATOM   | 136 | CG  | GLN | A | 73 | -10.738 | 32.456 | 3.208  | 1.00 | 41.40 | C    |   |
| ANISOU | 136 | CG  | GLN | A | 73 | 6151    | 4467   | 5112   | 834  | -1137 | 213  | C |
| ATOM   | 137 | CD  | GLN | A | 73 | -9.890  | 33.275 | 2.253  | 1.00 | 50.02 | C    |   |
| ANISOU | 137 | CD  | GLN | A | 73 | 7393    | 5542   | 6070   | 607  | -1260 | 327  | C |
| ATOM   | 138 | OE1 | GLN | A | 73 | -9.866  | 34.505 | 2.320  | 1.00 | 50.79 | O    |   |
| ANISOU | 138 | OE1 | GLN | A | 73 | 7752    | 5438   | 6109   | 543  | -1378 | 356  | O |
| ATOM   | 139 | NE2 | GLN | A | 73 | -9.193  | 32.594 | 1.350  | 1.00 | 54.16 | N    |   |
| ANISOU | 139 | NE2 | GLN | A | 73 | 7771    | 6283   | 6526   | 478  | -1245 | 388  | N |
| ATOM   | 140 | C   | GLN | A | 73 | -13.492 | 31.367 | 0.706  | 1.00 | 37.51 | C    |   |
| ANISOU | 140 | C   | GLN | A | 73 | 5395    | 4048   | 4810   | 1163 | -1161 | 236  | C |
| ATOM   | 141 | O   | GLN | A | 73 | -13.093 | 31.081 | -0.421 | 1.00 | 39.12 | O    |   |
| ANISOU | 141 | O   | GLN | A | 73 | 5546    | 4336   | 4982   | 1042 | -1184 | 318  | O |
| ATOM   | 142 | N   | ALA | A | 74 | -14.615 | 30.876 | 1.216  | 1.00 | 34.58 | N    |   |
| ANISOU | 142 | N   | ALA | A | 74 | 4919    | 3720   | 4499   | 1346 | -1096 | 152  | N |
| ATOM   | 143 | CA  | ALA | A | 74 | -15.449 | 29.958 | 0.456  | 1.00 | 34.83 | C    |   |
| ANISOU | 143 | CA  | ALA | A | 74 | 4788    | 3899   | 4548   | 1397 | -1044 | 163  | C |
| ATOM   | 144 | CB  | ALA | A | 74 | -16.565 | 29.406 | 1.331  | 1.00 | 35.95 | C    |   |
| ANISOU | 144 | CB  | ALA | A | 74 | 4820    | 4135   | 4703   | 1551 | -969  | 56   | C |
| ATOM   | 145 | C   | ALA | A | 74 | -16.021 | 30.666 | -0.772 | 1.00 | 38.19 | C    |   |
| ANISOU | 145 | C   | ALA | A | 74 | 5262    | 4264   | 4985   | 1429 | -1145 | 240  | C |
| ATOM   | 146 | O   | ALA | A | 74 | -16.201 | 30.059 | -1.826 | 1.00 | 33.50 | O    |   |
| ANISOU | 146 | O   | ALA | A | 74 | 4563    | 3780   | 4387   | 1368 | -1123 | 303  | O |
| ATOM   | 147 | N   | ALA | A | 75 | -16.285 | 31.961 | -0.629 | 1.00 | 38.17 | N    |   |
| ANISOU | 147 | N   | ALA | A | 75 | 5442    | 4075   | 4987   | 1527 | -1261 | 235  | N |
| ATOM   | 148 | CA  | ALA | A | 75 | -16.893 | 32.743 | -1.700 | 1.00 | 41.81 | C    |   |
| ANISOU | 148 | CA  | ALA | A | 75 | 5986    | 4450   | 5449   | 1592 | -1377 | 301  | C |
| ATOM   | 149 | CB  | ALA | A | 75 | -17.109 | 34.177 | -1.249 | 1.00 | 38.36 | C    |   |
| ANISOU | 149 | CB  | ALA | A | 75 | 5818    | 3766   | 4991   | 1734 | -1515 | 271  | C |
| ATOM   | 150 | C   | ALA | A | 75 | -16.069 | 32.703 | -2.986 | 1.00 | 45.27 | C    |   |
| ANISOU | 150 | C   | ALA | A | 75 | 6435    | 4901   | 5865   | 1356 | -1430 | 426  | C |
| ATOM   | 151 | O   | ALA | A | 75 | -16.605 | 32.876 | -4.079 | 1.00 | 44.44 | O    |   |
| ANISOU | 151 | O   | ALA | A | 75 | 6309    | 4805   | 5772   | 1367 | -1485 | 494  | O |
| ATOM   | 152 | N   | SER | A | 76 | -14.767 | 32.468 | -2.849 | 1.00 | 49.32 | N    |   |
| ANISOU | 152 | N   | SER | A | 76 | 6963    | 5447   | 6329   | 1141 | -1412 | 454  | N |
| ATOM   | 153 | CA  | SER | A | 76 | -13.872 | 32.415 | -4.002 | 1.00 | 51.21 | C    |   |
| ANISOU | 153 | CA  | SER | A | 76 | 7188    | 5755   | 6514   | 901  | -1466 | 559  | C |
| ATOM   | 154 | CB  | SER | A | 76 | -12.407 | 32.449 | -3.551 | 1.00 | 50.13 | C    |   |
| ANISOU | 154 | CB  | SER | A | 76 | 7100    | 5675   | 6274   | 692  | -1467 | 570  | C |
| ATOM   | 155 | OG  | SER | A | 76 | -12.024 | 31.228 | -2.937 | 1.00 | 45.84 | O    |   |
| ANISOU | 155 | OG  | SER | A | 76 | 6373    | 5313   | 5729   | 716  | -1316 | 512  | O |

|        |     |     |     |   |    |         |        |        |      |       |     |   |
|--------|-----|-----|-----|---|----|---------|--------|--------|------|-------|-----|---|
| ATOM   | 156 | C   | SER | A | 76 | -14.124 | 31.178 | -4.861 | 1.00 | 49.57 | C   |   |
| ANISOU | 156 | C   | SER | A | 76 | 6743    | 5756   | 6336   | 877  | -1366 | 586 | C |
| ATOM   | 157 | O   | SER | A | 76 | -13.829 | 31.173 | -6.055 | 1.00 | 50.74 | O   |   |
| ANISOU | 157 | O   | SER | A | 76 | 6852    | 5964   | 6463   | 730  | -1419 | 672 | O |
| ATOM   | 158 | N   | GLY | A | 77 | -14.669 | 30.133 | -4.247 | 1.00 | 45.42 | N   |   |
| ANISOU | 158 | N   | GLY | A | 77 | 6076    | 5339   | 5842   | 1001 | -1229 | 512 | N |
| ATOM   | 159 | CA  | GLY | A | 77 | -14.938 | 28.888 | -4.944 | 1.00 | 38.87 | C   |   |
| ANISOU | 159 | CA  | GLY | A | 77 | 5071    | 4687   | 5010   | 972  | -1130 | 532 | C |
| ATOM   | 160 | C   | GLY | A | 77 | -13.777 | 27.908 | -4.900 | 1.00 | 36.83 | C   |   |
| ANISOU | 160 | C   | GLY | A | 77 | 4745    | 4566   | 4684   | 856  | -1060 | 526 | C |
| ATOM   | 161 | O   | GLY | A | 77 | -13.878 | 26.796 | -5.414 | 1.00 | 39.26 | O   |   |
| ANISOU | 161 | O   | GLY | A | 77 | 4949    | 5003   | 4966   | 839  | -981  | 533 | O |
| ATOM   | 162 | N   | GLU | A | 78 | -12.668 | 28.328 | -4.295 | 1.00 | 38.46 | N   |   |
| ANISOU | 162 | N   | GLU | A | 78 | 5023    | 4754   | 4836   | 782  | -1094 | 512 | N |
| ATOM   | 163 | CA  | GLU | A | 78 | -11.509 | 27.458 | -4.126 | 1.00 | 36.63 | C   |   |
| ANISOU | 163 | CA  | GLU | A | 78 | 4721    | 4686   | 4510   | 714  | -1032 | 494 | C |
| ATOM   | 164 | CB  | GLU | A | 78 | -10.431 | 28.159 | -3.290 | 1.00 | 36.15 | C   |   |
| ANISOU | 164 | CB  | GLU | A | 78 | 4745    | 4618   | 4373   | 633  | -1072 | 481 | C |
| ATOM   | 165 | CG  | GLU | A | 78 | -9.044  | 27.536 | -3.385 | 1.00 | 30.40 | C   |   |
| ANISOU | 165 | CG  | GLU | A | 78 | 3931    | 4123   | 3498   | 539  | -1044 | 485 | C |
| ATOM   | 166 | CD  | GLU | A | 78 | -8.638  | 26.782 | -2.127 | 1.00 | 39.25 | C   |   |
| ANISOU | 166 | CD  | GLU | A | 78 | 5029    | 5301   | 4584   | 645  | -940  | 402 | C |
| ATOM   | 167 | OE1 | GLU | A | 78 | -9.398  | 26.799 | -1.136 | 1.00 | 34.58 | O   |   |
| ANISOU | 167 | OE1 | GLU | A | 78 | 4489    | 4561   | 4087   | 758  | -894  | 342 | O |
| ATOM   | 168 | OE2 | GLU | A | 78 | -7.546  | 26.179 | -2.129 | 1.00 | 45.23 | O   |   |
| ANISOU | 168 | OE2 | GLU | A | 78 | 5710    | 6271   | 5204   | 621  | -910  | 393 | O |
| ATOM   | 169 | C   | GLU | A | 78 | -11.973 | 26.172 | -3.456 | 1.00 | 35.40 | C   |   |
| ANISOU | 169 | C   | GLU | A | 78 | 4505    | 4582   | 4361   | 845  | -904  | 417 | C |
| ATOM   | 170 | O   | GLU | A | 78 | -12.694 | 26.213 | -2.461 | 1.00 | 34.38 | O   |   |
| ANISOU | 170 | O   | GLU | A | 78 | 4411    | 4369   | 4285   | 953  | -867  | 352 | O |
| ATOM   | 171 | N   | GLU | A | 79 | -11.577 | 25.034 | -4.016 | 1.00 | 30.51 | N   |   |
| ANISOU | 171 | N   | GLU | A | 79 | 3816    | 4105   | 3672   | 831  | -848  | 422 | N |
| ATOM   | 172 | CA  | GLU | A | 79 | -12.114 | 23.747 | -3.585 | 1.00 | 29.61 | C   |   |
| ANISOU | 172 | CA  | GLU | A | 79 | 3699    | 4017   | 3533   | 927  | -747  | 363 | C |
| ATOM   | 173 | CB  | GLU | A | 79 | -11.428 | 22.594 | -4.325 | 1.00 | 30.39 | C   |   |
| ANISOU | 173 | CB  | GLU | A | 79 | 3771    | 4256   | 3521   | 915  | -710  | 373 | C |
| ATOM   | 174 | CG  | GLU | A | 79 | -12.009 | 21.241 | -3.976 | 1.00 | 33.21 | C   |   |
| ANISOU | 174 | CG  | GLU | A | 79 | 4194    | 4606   | 3818   | 991  | -625  | 320 | C |
| ATOM   | 175 | CD  | GLU | A | 79 | -11.332 | 20.091 | -4.705 | 1.00 | 39.32 | C   |   |
| ANISOU | 175 | CD  | GLU | A | 79 | 4992    | 5487   | 4460   | 1013 | -599  | 322 | C |
| ATOM   | 176 | OE1 | GLU | A | 79 | -10.485 | 20.351 | -5.588 | 1.00 | 36.90 | O   |   |
| ANISOU | 176 | OE1 | GLU | A | 79 | 4606    | 5297   | 4117   | 970  | -644  | 363 | O |
| ATOM   | 177 | OE2 | GLU | A | 79 | -11.654 | 18.925 | -4.384 | 1.00 | 34.92 | O   |   |
| ANISOU | 177 | OE2 | GLU | A | 79 | 4550    | 4903   | 3815   | 1070 | -544  | 277 | O |
| ATOM   | 178 | C   | GLU | A | 79 | -12.032 | 23.514 | -2.077 | 1.00 | 28.43 | C   |   |
| ANISOU | 178 | C   | GLU | A | 79 | 3600    | 3822   | 3377   | 1010 | -698  | 274 | C |
| ATOM   | 179 | O   | GLU | A | 79 | -13.025 | 23.167 | -1.443 | 1.00 | 27.30 | O   |   |
| ANISOU | 179 | O   | GLU | A | 79 | 3478    | 3632   | 3263   | 1069 | -655  | 223 | O |
| ATOM   | 180 | N   | LEU | A | 80 | -10.851 | 23.693 | -1.502 | 1.00 | 24.06 | N   |   |
| ANISOU | 180 | N   | LEU | A | 80 | 3056    | 3317   | 2768   | 997  | -705  | 256 | N |
| ATOM   | 181 | CA  | LEU | A | 80 | -10.686 | 23.408 | -0.078 | 1.00 | 23.51 | C   |   |
| ANISOU | 181 | CA  | LEU | A | 80 | 3025    | 3218   | 2690   | 1064 | -653  | 176 | C |
| ATOM   | 182 | CB  | LEU | A | 80 | -9.209  | 23.430 | 0.322  | 1.00 | 25.50 | C   |   |
| ANISOU | 182 | CB  | LEU | A | 80 | 3261    | 3593   | 2836   | 1042 | -652  | 172 | C |
| ATOM   | 183 | CG  | LEU | A | 80 | -8.896  | 23.050 | 1.774  | 1.00 | 26.57 | C   |   |
| ANISOU | 183 | CG  | LEU | A | 80 | 3427    | 3719   | 2950   | 1106 | -592  | 96  | C |
| ATOM   | 184 | CD1 | LEU | A | 80 | -9.710  | 21.832 | 2.213  | 1.00 | 27.20 | C   |   |
| ANISOU | 184 | CD1 | LEU | A | 80 | 3559    | 3744   | 3031   | 1198 | -535  | 32  | C |
| ATOM   | 185 | CD2 | LEU | A | 80 | -7.399  | 22.811 | 1.978  | 1.00 | 25.60 | C   |   |
| ANISOU | 185 | CD2 | LEU | A | 80 | 3263    | 3789   | 2675   | 1108 | -580  | 98  | C |
| ATOM   | 186 | C   | LEU | A | 80 | -11.506 | 24.376 | 0.776  | 1.00 | 26.38 | C   |   |
| ANISOU | 186 | C   | LEU | A | 80 | 3420    | 3439   | 3163   | 1084 | -672  | 143 | C |
| ATOM   | 187 | O   | LEU | A | 80 | -12.194 | 23.960 | 1.706  | 1.00 | 25.48 | O   |   |
| ANISOU | 187 | O   | LEU | A | 80 | 3318    | 3288   | 3075   | 1147 | -625  | 71  | O |
| ATOM   | 188 | N   | ALA | A | 81 | -11.443 | 25.664 | 0.441  | 1.00 | 28.54 | N   |   |
| ANISOU | 188 | N   | ALA | A | 81 | 3724    | 3639   | 3481   | 1028 | -753  | 193 | N |
| ATOM   | 189 | CA  | ALA | A | 81 | -12.185 | 26.688 | 1.173  | 1.00 | 27.36 | C   |   |
| ANISOU | 189 | CA  | ALA | A | 81 | 3637    | 3340   | 3417   | 1080 | -789  | 158 | C |
| ATOM   | 190 | CB  | ALA | A | 81 | -11.926 | 28.064 | 0.574  | 1.00 | 26.10 | C   |   |
| ANISOU | 190 | CB  | ALA | A | 81 | 3573    | 3080   | 3264   | 1003 | -903  | 229 | C |



|        |     |     |     |   |    |         |        |        |      |       |       |   |
|--------|-----|-----|-----|---|----|---------|--------|--------|------|-------|-------|---|
| ATOM   | 191 | C   | ALA | A | 81 | -13.680 | 26.390 | 1.194  | 1.00 | 31.59 |       | C |
| ANISOU | 191 | C   | ALA | A | 81 | 4133    | 3858   | 4010   | 1191 | -766  | 115   | C |
| ATOM   | 192 | O   | ALA | A | 81 | -14.352 | 26.580 | 2.213  | 1.00 | 25.18 |       | O |
| ANISOU | 192 | O   | ALA | A | 81 | 3326    | 3006   | 3234   | 1276 | -749  | 35    | O |
| ATOM   | 193 | N   | VAL | A | 82 | -14.197 | 25.924 | 0.061  | 1.00 | 31.06 |       | N |
| ANISOU | 193 | N   | VAL | A | 82 | 4015    | 3856   | 3933   | 1178 | -766  | 166   | N |
| ATOM   | 194 | CA  | VAL | A | 82 | -15.606 | 25.578 | -0.050 | 1.00 | 27.70 |       | C |
| ANISOU | 194 | CA  | VAL | A | 82 | 3532    | 3478   | 3514   | 1251 | -739  | 140   | C |
| ATOM   | 195 | CB  | VAL | A | 82 | -16.004 | 25.260 | -1.514 | 1.00 | 27.35 |       | C |
| ANISOU | 195 | CB  | VAL | A | 82 | 3438    | 3504   | 3451   | 1198 | -746  | 227   | C |
| ATOM   | 196 | CG1 | VAL | A | 82 | -17.402 | 24.662 | -1.569 | 1.00 | 27.80 |       | C |
| ANISOU | 196 | CG1 | VAL | A | 82 | 3424    | 3676   | 3461   | 1237 | -696  | 203   | C |
| ATOM   | 197 | CG2 | VAL | A | 82 | -15.914 | 26.517 | -2.377 | 1.00 | 24.57 |       | C |
| ANISOU | 197 | CG2 | VAL | A | 82 | 3119    | 3060   | 3157   | 1188 | -850  | 303   | C |
| ATOM   | 198 | C   | VAL | A | 82 | -15.926 | 24.385 | 0.840  | 1.00 | 24.87 |       | C |
| ANISOU | 198 | C   | VAL | A | 82 | 3151    | 3206   | 3092   | 1257 | -653  | 60    | C |
| ATOM   | 199 | O   | VAL | A | 82 | -16.954 | 24.364 | 1.511  | 1.00 | 29.51 |       | O |
| ANISOU | 199 | O   | VAL | A | 82 | 3702    | 3841   | 3670   | 1316 | -638  | -7    | O |
| ATOM   | 200 | N   | ALA | A | 83 | -15.036 | 23.394 | 0.850  | 1.00 | 23.02 |       | N |
| ANISOU | 200 | N   | ALA | A | 83 | 2948    | 3007   | 2793   | 1198 | -608  | 64    | N |
| ATOM   | 201 | CA  | ALA | A | 83 | -15.231 | 22.204 | 1.679  | 1.00 | 25.13 |       | C |
| ANISOU | 201 | CA  | ALA | A | 83 | 3249    | 3324   | 2975   | 1189 | -545  | -6    | C |
| ATOM   | 202 | CB  | ALA | A | 83 | -14.197 | 21.121 | 1.336  | 1.00 | 22.47 |       | C |
| ANISOU | 202 | CB  | ALA | A | 83 | 2981    | 3013   | 2542   | 1162 | -515  | 14    | C |
| ATOM   | 203 | C   | ALA | A | 83 | -15.185 | 22.527 | 3.167  | 1.00 | 26.73 |       | C |
| ANISOU | 203 | C   | ALA | A | 83 | 3455    | 3487   | 3213   | 1226 | -537  | -95   | C |
| ATOM   | 204 | O   | ALA | A | 83 | -15.936 | 21.949 | 3.953  | 1.00 | 25.53 |       | O |
| ANISOU | 204 | O   | ALA | A | 83 | 3301    | 3387   | 3011   | 1215 | -510  | -166  | O |
| ATOM   | 205 | N   | VAL | A | 84 | -14.302 | 23.440 | 3.558  | 1.00 | 25.28 |       | N |
| ANISOU | 205 | N   | VAL | A | 84 | 3281    | 3227   | 3096   | 1243 | -563  | -89   | N |
| ATOM   | 206 | CA  | VAL | A | 84 | -14.217 | 23.826 | 4.960  | 1.00 | 23.99 |       | C |
| ANISOU | 206 | CA  | VAL | A | 84 | 3121    | 3021   | 2973   | 1267 | -551  | -169  | C |
| ATOM   | 207 | CB  | VAL | A | 84 | -13.116 | 24.882 | 5.227  | 1.00 | 24.57 |       | C |
| ANISOU | 207 | CB  | VAL | A | 84 | 3232    | 3016   | 3087   | 1246 | -579  | -138  | C |
| ATOM   | 208 | CG1 | VAL | A | 84 | -13.289 | 25.490 | 6.624  | 1.00 | 22.78 |       | C |
| ANISOU | 208 | CG1 | VAL | A | 84 | 3013    | 2727   | 2915   | 1272 | -570  | -219  | C |
| ATOM   | 209 | CG2 | VAL | A | 84 | -11.724 | 24.272 | 5.062  | 1.00 | 23.84 |       | C |
| ANISOU | 209 | CG2 | VAL | A | 84 | 3150    | 2997   | 2909   | 1191 | -550  | -98   | C |
| ATOM   | 210 | C   | VAL | A | 84 | -15.568 | 24.364 | 5.426  | 1.00 | 26.67 |       | C |
| ANISOU | 210 | C   | VAL | A | 84 | 3411    | 3368   | 3353   | 1334 | -571  | -233  | C |
| ATOM   | 211 | O   | VAL | A | 84 | -16.099 | 23.932 | 6.446  | 1.00 | 28.18 |       | O |
| ANISOU | 211 | O   | VAL | A | 84 | 3571    | 3615   | 3519   | 1333 | -543  | -321  | O |
| ATOM   | 212 | N   | ALA | A | 85 | -16.125 | 25.300 | 4.664  | 1.00 | 30.62 |       | N |
| ANISOU | 212 | N   | ALA | A | 85 | 3903    | 3833   | 3897   | 1397 | -629  | -194  | N |
| ATOM   | 213 | CA  | ALA | A | 85 | -17.397 | 25.914 | 5.034  | 1.00 | 30.36 |       | C |
| ANISOU | 213 | CA  | ALA | A | 85 | 3817    | 3841   | 3880   | 1513 | -660  | -261  | C |
| ATOM   | 214 | CB  | ALA | A | 85 | -17.833 | 26.929 | 3.980  | 1.00 | 30.93 |       | C |
| ANISOU | 214 | CB  | ALA | A | 85 | 3911    | 3854   | 3985   | 1602 | -737  | -198  | C |
| ATOM   | 215 | C   | ALA | A | 85 | -18.476 | 24.856 | 5.237  | 1.00 | 29.68 |       | C |
| ANISOU | 215 | C   | ALA | A | 85 | 3635    | 3951   | 3690   | 1484 | -615  | -316  | C |
| ATOM   | 216 | O   | ALA | A | 85 | -19.214 | 24.885 | 6.219  | 1.00 | 32.76 |       | O |
| ANISOU | 216 | O   | ALA | A | 85 | 3959    | 4438   | 4048   | 1526 | -611  | -417  | O |
| ATOM   | 217 | N   | GLU | A | 86 | -18.548 | 23.907 | 4.310  | 1.00 | 38.49 |       | N |
| ANISOU | 217 | N   | GLU | A | 86 | 2979    | 7476   | 4169   | 1653 | -814  | -1739 | N |
| ATOM   | 218 | CA  | GLU | A | 86 | -19.559 | 22.860 | 4.372  | 1.00 | 41.16 |       | C |
| ANISOU | 218 | CA  | GLU | A | 86 | 3056    | 7789   | 4793   | 1593 | -961  | -1994 | C |
| ATOM   | 219 | CB  | GLU | A | 86 | -19.570 | 22.058 | 3.067  | 1.00 | 52.40 |       | C |
| ANISOU | 219 | CB  | GLU | A | 86 | 4215    | 9556   | 6139   | 1675 | -1172 | -2390 | C |
| ATOM   | 220 | CG  | GLU | A | 86 | -20.664 | 21.012 | 2.994  | 1.00 | 67.50 |       | C |
| ANISOU | 220 | CG  | GLU | A | 86 | 5814    | 11466  | 8367   | 1618 | -1337 | -2700 | C |
| ATOM   | 221 | CD  | GLU | A | 86 | -20.737 | 20.344 | 1.636  | 1.00 | 82.74 |       | C |
| ANISOU | 221 | CD  | GLU | A | 86 | 7469    | 13786  | 10182  | 1728 | -1560 | -3126 | C |
| ATOM   | 222 | OE1 | GLU | A | 86 | -20.069 | 20.827 | 0.697  | 1.00 | 86.57 |       | O |
| ANISOU | 222 | OE1 | GLU | A | 86 | 8013    | 14604  | 10277  | 1890 | -1575 | -3131 | O |
| ATOM   | 223 | OE2 | GLU | A | 86 | -21.465 | 19.337 | 1.507  | 1.00 | 90.33 |       | O |
| ANISOU | 223 | OE2 | GLU | A | 86 | 8145    | 14726  | 11450  | 1659 | -1715 | -3462 | O |
| ATOM   | 224 | C   | GLU | A | 86 | -19.327 | 21.933 | 5.566  | 1.00 | 37.70 |       | C |
| ANISOU | 224 | C   | GLU | A | 86 | 2641    | 6921   | 4760   | 1375 | -929  | -2033 | C |
| ATOM   | 225 | O   | GLU | A | 86 | -20.276 | 21.490 | 6.208  | 1.00 | 40.52 |       | O |
| ANISOU | 225 | O   | GLU | A | 86 | 2884    | 7109   | 5405   | 1305 | -933  | -2036 | O |

|        |     |     |     |   |    |         |        |        |      |       |       |   |
|--------|-----|-----|-----|---|----|---------|--------|--------|------|-------|-------|---|
| ATOM   | 226 | N   | ARG | A | 87 | -18.060 | 21.664 | 5.869  | 1.00 | 32.00 | N     |   |
| ANISOU | 226 | N   | ARG | A | 87 | 2065    | 6034   | 4061   | 1283 | -884  | -2041 | N |
| ATOM   | 227 | CA  | ARG | A | 87 | -17.700 | 20.684 | 6.891  | 1.00 | 30.56 | C     |   |
| ANISOU | 227 | CA  | ARG | A | 87 | 1891    | 5481   | 4240   | 1105 | -861  | -2089 | C |
| ATOM   | 228 | CB  | ARG | A | 87 | -16.314 | 20.081 | 6.605  | 1.00 | 33.33 | C     |   |
| ANISOU | 228 | CB  | ARG | A | 87 | 2281    | 5801   | 4582   | 1049 | -900  | -2256 | C |
| ATOM   | 229 | CG  | ARG | A | 87 | -16.201 | 19.315 | 5.289  | 1.00 | 44.21 | C     |   |
| ANISOU | 229 | CG  | ARG | A | 87 | 3427    | 7452   | 5920   | 1108 | -1083 | -2642 | C |
| ATOM   | 230 | CD  | ARG | A | 87 | -17.151 | 18.134 | 5.242  | 1.00 | 51.41 | C     |   |
| ANISOU | 230 | CD  | ARG | A | 87 | 4048    | 8280   | 7206   | 1040 | -1212 | -2928 | C |
| ATOM   | 231 | NE  | ARG | A | 87 | -16.980 | 17.335 | 4.030  | 1.00 | 55.35 | N     |   |
| ANISOU | 231 | NE  | ARG | A | 87 | 4315    | 9025   | 7690   | 1091 | -1398 | -3352 | N |
| ATOM   | 232 | CZ  | ARG | A | 87 | -16.319 | 16.183 | 3.983  | 1.00 | 51.90 | C     |   |
| ANISOU | 232 | CZ  | ARG | A | 87 | 3779    | 8429   | 7511   | 998  | -1464 | -3623 | C |
| ATOM   | 233 | NH1 | ARG | A | 87 | -15.764 | 15.690 | 5.083  | 1.00 | 44.98 | N     |   |
| ANISOU | 233 | NH1 | ARG | A | 87 | 3015    | 7154   | 6921   | 855  | -1356 | -3487 | N |
| ATOM   | 234 | NH2 | ARG | A | 87 | -16.219 | 15.520 | 2.839  | 1.00 | 54.00 | N     |   |
| ANISOU | 234 | NH2 | ARG | A | 87 | 3828    | 8946   | 7744   | 1063 | -1638 | -4035 | N |
| ATOM   | 235 | C   | ARG | A | 87 | -17.727 | 21.214 | 8.327  | 1.00 | 32.89 | C     |   |
| ANISOU | 235 | C   | ARG | A | 87 | 2403    | 5467   | 4624   | 1036 | -684  | -1756 | C |
| ATOM   | 236 | O   | ARG | A | 87 | -17.613 | 20.433 | 9.274  | 1.00 | 31.14 | O     |   |
| ANISOU | 236 | O   | ARG | A | 87 | 2178    | 4954   | 4699   | 917  | -648  | -1747 | O |
| ATOM   | 237 | N   | VAL | A | 88 | -17.855 | 22.526 | 8.506  | 1.00 | 31.55 | N     |   |
| ANISOU | 237 | N   | VAL | A | 88 | 2420    | 5362   | 4204   | 1123 | -566  | -1484 | N |
| ATOM   | 238 | CA  | VAL | A | 88 | -17.858 | 23.076 | 9.865  | 1.00 | 27.71 | C     |   |
| ANISOU | 238 | CA  | VAL | A | 88 | 2142    | 4607   | 3780   | 1073 | -404  | -1203 | C |
| ATOM   | 239 | CB  | VAL | A | 88 | -16.683 | 24.066 | 10.116 | 1.00 | 30.22 | C     |   |
| ANISOU | 239 | CB  | VAL | A | 88 | 2728    | 4887   | 3869   | 1080 | -291  | -1035 | C |
| ATOM   | 240 | CG1 | VAL | A | 88 | -15.336 | 23.368 | 9.941  | 1.00 | 25.50 | C     |   |
| ANISOU | 240 | CG1 | VAL | A | 88 | 2145    | 4245   | 3299   | 997  | -345  | -1199 | C |
| ATOM   | 241 | CG2 | VAL | A | 88 | -16.795 | 25.287 | 9.213  | 1.00 | 32.27 | C     |   |
| ANISOU | 241 | CG2 | VAL | A | 88 | 3047    | 5395   | 3820   | 1222 | -248  | -923  | C |
| ATOM   | 242 | C   | VAL | A | 88 | -19.171 | 23.760 | 10.236 | 1.00 | 29.98 | C     |   |
| ANISOU | 242 | C   | VAL | A | 88 | 2419    | 4906   | 4065   | 1148 | -332  | -1013 | C |
| ATOM   | 243 | O   | VAL | A | 88 | -19.262 | 24.398 | 11.279 | 1.00 | 29.50 | O     |   |
| ANISOU | 243 | O   | VAL | A | 88 | 2535    | 4669   | 4004   | 1142 | -192  | -779  | O |
| ATOM   | 244 | N   | GLN | A | 89 | -20.190 | 23.611 | 9.396  | 1.00 | 25.35 | N     |   |
| ANISOU | 244 | N   | GLN | A | 89 | 1615    | 4541   | 3477   | 1228 | -434  | -1132 | N |
| ATOM   | 245 | CA  | GLN | A | 89 | -21.437 | 24.341 | 9.613  | 1.00 | 29.24 | C     |   |
| ANISOU | 245 | CA  | GLN | A | 89 | 2085    | 5088   | 3938   | 1323 | -369  | -950  | C |
| ATOM   | 246 | CB  | GLN | A | 89 | -22.317 | 24.343 | 8.352  | 1.00 | 32.40 | C     |   |
| ANISOU | 246 | CB  | GLN | A | 89 | 2245    | 5839   | 4228   | 1452 | -509  | -1107 | C |
| ATOM   | 247 | CG  | GLN | A | 89 | -22.731 | 22.978 | 7.847  | 1.00 | 37.84 | C     |   |
| ANISOU | 247 | CG  | GLN | A | 89 | 2619    | 6581   | 5177   | 1380 | -691  | -1456 | C |
| ATOM   | 248 | CD  | GLN | A | 89 | -23.452 | 23.048 | 6.508  | 1.00 | 43.54 | C     |   |
| ANISOU | 248 | CD  | GLN | A | 89 | 3103    | 7715   | 5726   | 1532 | -853  | -1653 | C |
| ATOM   | 249 | OE1 | GLN | A | 89 | -24.246 | 23.958 | 6.261  | 1.00 | 43.59 | O     |   |
| ANISOU | 249 | OE1 | GLN | A | 89 | 3108    | 7912   | 5542   | 1682 | -818  | -1485 | O |
| ATOM   | 250 | NE2 | GLN | A | 89 | -23.180 | 22.082 | 5.639  | 1.00 | 47.24 | N     |   |
| ANISOU | 250 | NE2 | GLN | A | 89 | 3361    | 8333   | 6255   | 1509 | -1034 | -2018 | N |
| ATOM   | 251 | C   | GLN | A | 89 | -22.229 | 23.885 | 10.845 | 1.00 | 33.72 | C     |   |
| ANISOU | 251 | C   | GLN | A | 89 | 2614    | 5386   | 4812   | 1240 | -291  | -844  | C |
| ATOM   | 252 | O   | GLN | A | 89 | -23.075 | 24.623 | 11.345 | 1.00 | 34.37 | O     |   |
| ANISOU | 252 | O   | GLN | A | 89 | 2747    | 5450   | 4862   | 1311 | -188  | -633  | O |
| ATOM   | 253 | N   | GLU | A | 90 | -21.953 | 22.683 | 11.344 | 1.00 | 33.86 | N     |   |
| ANISOU | 253 | N   | GLU | A | 90 | 2539    | 5194   | 5131   | 1104 | -323  | -970  | N |
| ATOM   | 254 | CA  | GLU | A | 90 | -22.653 | 22.195 | 12.532 | 1.00 | 33.03 | C     |   |
| ANISOU | 254 | CA  | GLU | A | 90 | 2390    | 4833   | 5328   | 1039 | -223  | -836  | C |
| ATOM   | 255 | CB  | GLU | A | 90 | -22.954 | 20.699 | 12.421 | 1.00 | 36.94 | C     |   |
| ANISOU | 255 | CB  | GLU | A | 90 | 2603    | 5209   | 6224   | 925  | -317  | -1068 | C |
| ATOM   | 256 | CG  | GLU | A | 90 | -23.727 | 20.296 | 11.182 | 1.00 | 48.15 | C     |   |
| ANISOU | 256 | CG  | GLU | A | 90 | 3720    | 6867   | 7707   | 953  | -494  | -1357 | C |
| ATOM   | 257 | CD  | GLU | A | 90 | -24.120 | 18.830 | 11.199 | 1.00 | 57.22 | C     |   |
| ANISOU | 257 | CD  | GLU | A | 90 | 4571    | 7841   | 9328   | 825  | -567  | -1593 | C |
| ATOM   | 258 | OE1 | GLU | A | 90 | -23.930 | 18.177 | 12.247 | 1.00 | 60.46 | O     |   |
| ANISOU | 258 | OE1 | GLU | A | 90 | 5013    | 7933   | 10027  | 729  | -449  | -1466 | O |
| ATOM   | 259 | OE2 | GLU | A | 90 | -24.622 | 18.333 | 10.168 | 1.00 | 57.88 | O     |   |
| ANISOU | 259 | OE2 | GLU | A | 90 | 4380    | 8109   | 9504   | 830  | -738  | -1906 | O |
| ATOM   | 260 | C   | GLU | A | 90 | -21.879 | 22.456 | 13.825 | 1.00 | 34.22 | C     |   |
| ANISOU | 260 | C   | GLU | A | 90 | 2804    | 4743   | 5455   | 1001 | -68   | -612  | C |

|        |     |     |     |   |    |         |        |        |      |       |       |   |
|--------|-----|-----|-----|---|----|---------|--------|--------|------|-------|-------|---|
| ATOM   | 261 | O   | GLU | A | 90 | -22.396 | 22.235 | 14.921 | 1.00 | 35.45 | O     |   |
| ANISOU | 261 | O   | GLU | A | 90 | 2967    | 4710   | 5792   | 984  | 47    | -442  | O |
| ATOM   | 262 | N   | LYS | A | 91 | -20.642 | 22.925 | 13.700 | 1.00 | 30.40 | N     |   |
| ANISOU | 262 | N   | LYS | A | 91 | 2523    | 4283   | 4744   | 1000 | -66   | -614  | N |
| ATOM   | 263 | CA  | LYS | A | 91 | -19.754 | 23.037 | 14.857 | 1.00 | 28.75 | C     |   |
| ANISOU | 263 | CA  | LYS | A | 91 | 2533    | 3873   | 4517   | 959  | 44    | -468  | C |
| ATOM   | 264 | CB  | LYS | A | 91 | -18.304 | 23.195 | 14.397 | 1.00 | 22.64 | C     |   |
| ANISOU | 264 | CB  | LYS | A | 91 | 1887    | 3149   | 3565   | 927  | -7    | -574  | C |
| ATOM   | 265 | CG  | LYS | A | 91 | -17.822 | 22.069 | 13.498 | 1.00 | 22.47 | C     |   |
| ANISOU | 265 | CG  | LYS | A | 91 | 1683    | 3180   | 3675   | 862  | -154  | -846  | C |
| ATOM   | 266 | CD  | LYS | A | 91 | -17.734 | 20.756 | 14.266 | 1.00 | 30.88 | C     |   |
| ANISOU | 266 | CD  | LYS | A | 91 | 2645    | 4010   | 5077   | 771  | -149  | -883  | C |
| ATOM   | 267 | CE  | LYS | A | 91 | -17.294 | 19.617 | 13.354 | 1.00 | 34.03 | C     |   |
| ANISOU | 267 | CE  | LYS | A | 91 | 2850    | 4438   | 5643   | 708  | -293  | -1181 | C |
| ATOM   | 268 | NZ  | LYS | A | 91 | -17.042 | 18.367 | 14.115 | 1.00 | 34.19 | N     |   |
| ANISOU | 268 | NZ  | LYS | A | 91 | 2787    | 4195   | 6007   | 627  | -266  | -1193 | N |
| ATOM   | 269 | C   | LYS | A | 91 | -20.129 | 24.178 | 15.807 | 1.00 | 32.81 | C     |   |
| ANISOU | 269 | C   | LYS | A | 91 | 3248    | 4335   | 4885   | 1038 | 199   | -207  | C |
| ATOM   | 270 | O   | LYS | A | 91 | -20.556 | 25.248 | 15.372 | 1.00 | 28.89 | O     |   |
| ANISOU | 270 | O   | LYS | A | 91 | 2812    | 3971   | 4194   | 1127 | 229   | -133  | O |
| ATOM   | 271 | N   | ASP | A | 92 | -19.957 | 23.942 | 17.105 | 1.00 | 33.28 | N     |   |
| ANISOU | 271 | N   | ASP | A | 92 | 3405    | 4207   | 5034   | 1020 | 302   | -68   | N |
| ATOM   | 272 | CA  | ASP | A | 92 | -20.226 | 24.971 | 18.105 | 1.00 | 34.24 | C     |   |
| ANISOU | 272 | CA  | ASP | A | 92 | 3720    | 4280   | 5011   | 1102 | 446   | 146   | C |
| ATOM   | 273 | CB  | ASP | A | 92 | -20.616 | 24.348 | 19.452 | 1.00 | 34.06 | C     |   |
| ANISOU | 273 | CB  | ASP | A | 92 | 3685    | 4094   | 5160   | 1113 | 555   | 302   | C |
| ATOM   | 274 | CG  | ASP | A | 92 | -19.489 | 23.545 | 20.082 | 1.00 | 38.34 | C     |   |
| ANISOU | 274 | CG  | ASP | A | 92 | 4280    | 4522   | 5765   | 1054 | 543   | 273   | C |
| ATOM   | 275 | OD1 | ASP | A | 92 | -18.321 | 23.707 | 19.674 | 1.00 | 39.65 | O     |   |
| ANISOU | 275 | OD1 | ASP | A | 92 | 4541    | 4724   | 5800   | 1009 | 467   | 146   | O |
| ATOM   | 276 | OD2 | ASP | A | 92 | -19.773 | 22.750 | 21.001 | 1.00 | 46.09 | O     |   |
| ANISOU | 276 | OD2 | ASP | A | 92 | 5200    | 5380   | 6930   | 1066 | 621   | 396   | O |
| ATOM   | 277 | C   | ASP | A | 92 | -19.029 | 25.899 | 18.260 | 1.00 | 35.36 | C     |   |
| ANISOU | 277 | C   | ASP | A | 92 | 4101    | 4425   | 4907   | 1107 | 470   | 145   | C |
| ATOM   | 278 | O   | ASP | A | 92 | -17.991 | 25.693 | 17.634 | 1.00 | 31.89 | O     |   |
| ANISOU | 278 | O   | ASP | A | 92 | 3674    | 4024   | 4418   | 1044 | 383   | 1     | O |
| ATOM   | 279 | N   | SER | A | 93 | -19.177 | 26.920 | 19.096 | 1.00 | 30.13 | N     |   |
| ANISOU | 279 | N   | SER | A | 93 | 3618    | 3721   | 4110   | 1181 | 590   | 290   | N |
| ATOM   | 280 | CA  | SER | A | 93 | -18.111 | 27.893 | 19.308 | 1.00 | 30.40 | C     |   |
| ANISOU | 280 | CA  | SER | A | 93 | 3865    | 3736   | 3950   | 1180 | 622   | 272   | C |
| ATOM   | 281 | CB  | SER | A | 93 | -18.597 | 29.023 | 20.223 | 1.00 | 36.47 | C     |   |
| ANISOU | 281 | CB  | SER | A | 93 | 4794    | 4452   | 4609   | 1279 | 760   | 414   | C |
| ATOM   | 282 | OG  | SER | A | 93 | -19.538 | 29.843 | 19.550 | 1.00 | 42.72 | O     |   |
| ANISOU | 282 | OG  | SER | A | 93 | 5561    | 5316   | 5353   | 1357 | 804   | 489   | O |
| ATOM   | 283 | C   | SER | A | 93 | -16.872 | 27.246 | 19.909 | 1.00 | 29.42 | C     |   |
| ANISOU | 283 | C   | SER | A | 93 | 3797    | 3539   | 3844   | 1107 | 580   | 191   | C |
| ATOM   | 284 | O   | SER | A | 93 | -15.746 | 27.650 | 19.619 | 1.00 | 31.89 | O     |   |
| ANISOU | 284 | O   | SER | A | 93 | 4202    | 3863   | 4052   | 1058 | 545   | 93    | O |
| ATOM   | 285 | N   | GLY | A | 94 | -17.088 | 26.252 | 20.760 | 1.00 | 23.92 | N     |   |
| ANISOU | 285 | N   | GLY | A | 94 | 3033    | 2767   | 3289   | 1109 | 595   | 248   | N |
| ATOM   | 286 | CA  | GLY | A | 94 | -15.994 | 25.557 | 21.408 | 1.00 | 27.96 | C     |   |
| ANISOU | 286 | CA  | GLY | A | 94 | 3582    | 3222   | 3820   | 1067 | 562   | 202   | C |
| ATOM   | 287 | C   | GLY | A | 94 | -15.049 | 24.953 | 20.390 | 1.00 | 27.99 | C     |   |
| ANISOU | 287 | C   | GLY | A | 94 | 3506    | 3257   | 3872   | 968  | 436   | 21    | C |
| ATOM   | 288 | O   | GLY | A | 94 | -13.832 | 24.996 | 20.556 | 1.00 | 24.50 | O     |   |
| ANISOU | 288 | O   | GLY | A | 94 | 3150    | 2813   | 3346   | 927  | 397   | -60   | O |
| ATOM   | 289 | N   | PHE | A | 95 | -15.616 | 24.390 | 19.330 | 1.00 | 26.11 | N     |   |
| ANISOU | 289 | N   | PHE | A | 95 | 3092    | 3064   | 3763   | 932  | 368   | -58   | N |
| ATOM   | 290 | CA  | PHE | A | 95 | -14.819 | 23.796 | 18.263 | 1.00 | 24.26 | C     |   |
| ANISOU | 290 | CA  | PHE | A | 95 | 2764    | 2887   | 3566   | 854  | 246   | -251  | C |
| ATOM   | 291 | CB  | PHE | A | 95 | -15.744 | 23.208 | 17.195 | 1.00 | 26.57 | C     |   |
| ANISOU | 291 | CB  | PHE | A | 95 | 2840    | 3253   | 4002   | 843  | 171   | -349  | C |
| ATOM   | 292 | CG  | PHE | A | 95 | -15.035 | 22.721 | 15.963 | 1.00 | 24.11 | C     |   |
| ANISOU | 292 | CG  | PHE | A | 95 | 2426    | 3047   | 3688   | 790  | 43    | -572  | C |
| ATOM   | 293 | CD1 | PHE | A | 95 | -14.542 | 21.426 | 15.894 | 1.00 | 24.40 | C     |   |
| ANISOU | 293 | CD1 | PHE | A | 95 | 2336    | 3002   | 3934   | 724  | -30   | -709  | C |
| ATOM   | 294 | CE1 | PHE | A | 95 | -13.902 | 20.970 | 14.754 | 1.00 | 26.42 | C     |   |
| ANISOU | 294 | CE1 | PHE | A | 95 | 2492    | 3366   | 4180   | 690  | -147  | -935  | C |
| ATOM   | 295 | CZ  | PHE | A | 95 | -13.751 | 21.811 | 13.670 | 1.00 | 30.78 | C     |   |
| ANISOU | 295 | CZ  | PHE | A | 95 | 3070    | 4131   | 4492   | 730  | -186  | -1003 | C |

|        |     |     |     |   |    |         |        |        |      |       |      |   |
|--------|-----|-----|-----|---|----|---------|--------|--------|------|-------|------|---|
| ATOM   | 296 | CE2 | PHE | A | 95 | -14.243 | 23.103 | 13.723 | 1.00 | 27.11 | C    |   |
| ANISOU | 296 | CE2 | PHE | A | 95 | 2730    | 3741   | 3828   | 799  | -102  | -838 | C |
| ATOM   | 297 | CD2 | PHE | A | 95 | -14.882 | 23.551 | 14.866 | 1.00 | 25.25 | C    |   |
| ANISOU | 297 | CD2 | PHE | A | 95 | 2595    | 3376   | 3624   | 823  | 8     | -635 | C |
| ATOM   | 298 | C   | PHE | A | 95 | -13.866 | 24.820 | 17.649 | 1.00 | 24.52 | C    |   |
| ANISOU | 298 | C   | PHE | A | 95 | 2929    | 3014   | 3374   | 841  | 229   | -321 | C |
| ATOM   | 299 | O   | PHE | A | 95 | -12.676 | 24.551 | 17.491 | 1.00 | 26.01 | O    |   |
| ANISOU | 299 | O   | PHE | A | 95 | 3143    | 3205   | 3536   | 786  | 176   | -428 | O |
| ATOM   | 300 | N   | PHE | A | 96 | -14.389 | 26.000 | 17.315 | 1.00 | 21.40 | N    |   |
| ANISOU | 300 | N   | PHE | A | 96 | 2609    | 2687   | 2836   | 898  | 290   | -245 | N |
| ATOM   | 301 | CA  | PHE | A | 96 | -13.576 | 27.031 | 16.678 | 1.00 | 24.97 | C    |   |
| ANISOU | 301 | CA  | PHE | A | 96 | 3169    | 3207   | 3111   | 892  | 306   | -277 | C |
| ATOM   | 302 | CB  | PHE | A | 96 | -14.448 | 28.167 | 16.124 | 1.00 | 27.38 | C    |   |
| ANISOU | 302 | CB  | PHE | A | 96 | 3506    | 3590   | 3307   | 980  | 380   | -166 | C |
| ATOM   | 303 | CG  | PHE | A | 96 | -15.321 | 27.752 | 14.971 | 1.00 | 29.49 | C    |   |
| ANISOU | 303 | CG  | PHE | A | 96 | 3591    | 4021   | 3593   | 1026 | 308   | -207 | C |
| ATOM   | 304 | CD1 | PHE | A | 96 | -14.794 | 27.630 | 13.696 | 1.00 | 28.31 | C    |   |
| ANISOU | 304 | CD1 | PHE | A | 96 | 3361    | 4037   | 3360   | 1025 | 232   | -322 | C |
| ATOM   | 305 | CE1 | PHE | A | 96 | -15.590 | 27.244 | 12.633 | 1.00 | 28.48 | C    |   |
| ANISOU | 305 | CE1 | PHE | A | 96 | 3200    | 4250   | 3373   | 1087 | 148   | -393 | C |
| ATOM   | 306 | CZ  | PHE | A | 96 | -16.931 | 26.973 | 12.836 | 1.00 | 28.25 | C    |   |
| ANISOU | 306 | CZ  | PHE | A | 96 | 3057    | 4229   | 3448   | 1132 | 137   | -351 | C |
| ATOM   | 307 | CE2 | PHE | A | 96 | -17.473 | 27.093 | 14.103 | 1.00 | 27.40 | C    |   |
| ANISOU | 307 | CE2 | PHE | A | 96 | 3028    | 3938   | 3445   | 1124 | 227   | -214 | C |
| ATOM   | 308 | CD2 | PHE | A | 96 | -16.667 | 27.478 | 15.164 | 1.00 | 27.33 | C    |   |
| ANISOU | 308 | CD2 | PHE | A | 96 | 3212    | 3757   | 3415   | 1079 | 313   | -142 | C |
| ATOM   | 309 | C   | PHE | A | 96 | -12.503 | 27.573 | 17.627 | 1.00 | 27.67 | C    |   |
| ANISOU | 309 | C   | PHE | A | 96 | 3681    | 3447   | 3384   | 859  | 355   | -272 | C |
| ATOM   | 310 | O   | PHE | A | 96 | -11.410 | 27.927 | 17.198 | 1.00 | 24.12 | O    |   |
| ANISOU | 310 | O   | PHE | A | 96 | 3278    | 3023   | 2865   | 804  | 336   | -348 | O |
| ATOM   | 311 | N   | LEU | A | 97 | -12.812 | 27.619 | 18.918 | 1.00 | 27.46 | N    |   |
| ANISOU | 311 | N   | LEU | A | 97 | 3734    | 3325   | 3375   | 889  | 411   | -182 | N |
| ATOM   | 312 | CA  | LEU | A | 97 | -11.860 | 28.124 | 19.905 | 1.00 | 24.92 | C    |   |
| ANISOU | 312 | CA  | LEU | A | 97 | 3556    | 2943   | 2968   | 859  | 431   | -193 | C |
| ATOM   | 313 | CB  | LEU | A | 97 | -12.524 | 28.279 | 21.277 | 1.00 | 30.65 | C    |   |
| ANISOU | 313 | CB  | LEU | A | 97 | 4360    | 3611   | 3675   | 945  | 510   | -82  | C |
| ATOM   | 314 | CG  | LEU | A | 97 | -13.309 | 29.580 | 21.440 | 1.00 | 41.20 | C    |   |
| ANISOU | 314 | CG  | LEU | A | 97 | 5801    | 4922   | 4930   | 1017 | 619   | 5    | C |
| ATOM   | 315 | CD1 | LEU | A | 97 | -14.180 | 29.557 | 22.690 | 1.00 | 46.19 | C    |   |
| ANISOU | 315 | CD1 | LEU | A | 97 | 6477    | 5524   | 5548   | 1128 | 703   | 121  | C |
| ATOM   | 316 | CD2 | LEU | A | 97 | -12.356 | 30.768 | 21.457 | 1.00 | 39.67 | C    |   |
| ANISOU | 316 | CD2 | LEU | A | 97 | 5736    | 4689   | 4648   | 970  | 640   | -72  | C |
| ATOM   | 317 | C   | LEU | A | 97 | -10.583 | 27.283 | 20.006 | 1.00 | 22.85 | C    |   |
| ANISOU | 317 | C   | LEU | A | 97 | 3255    | 2688   | 2738   | 779  | 333   | -308 | C |
| ATOM   | 318 | O   | LEU | A | 97 | -9.506  | 27.822 | 20.243 | 1.00 | 24.44 | O    |   |
| ANISOU | 318 | O   | LEU | A | 97 | 3532    | 2884   | 2868   | 728  | 316   | -370 | O |
| ATOM   | 319 | N   | ARG | A | 98 | -10.698 | 25.968 | 19.828 | 1.00 | 25.04 | N    |   |
| ANISOU | 319 | N   | ARG | A | 98 | 3400    | 2967   | 3148   | 771  | 272   | -339 | N |
| ATOM   | 320 | CA  | ARG | A | 98 | -9.509  | 25.109 | 19.796 | 1.00 | 21.91 | C    |   |
| ANISOU | 320 | CA  | ARG | A | 98 | 2951    | 2576   | 2798   | 708  | 183   | -449 | C |
| ATOM   | 321 | CB  | ARG | A | 98 | -9.851  | 23.694 | 19.318 | 1.00 | 23.26 | C    |   |
| ANISOU | 321 | CB  | ARG | A | 98 | 2949    | 2724   | 3165   | 701  | 126   | -496 | C |
| ATOM   | 322 | CG  | ARG | A | 98 | -10.854 | 22.949 | 20.160 | 1.00 | 31.70 | C    |   |
| ANISOU | 322 | CG  | ARG | A | 98 | 3958    | 3701   | 4386   | 766  | 181   | -362 | C |
| ATOM   | 323 | CD  | ARG | A | 98 | -11.361 | 21.742 | 19.387 | 1.00 | 37.28 | C    |   |
| ANISOU | 323 | CD  | ARG | A | 98 | 4461    | 4370   | 5336   | 739  | 127   | -437 | C |
| ATOM   | 324 | NE  | ARG | A | 98 | -11.948 | 20.733 | 20.259 | 1.00 | 46.84 | N    |   |
| ANISOU | 324 | NE  | ARG | A | 98 | 5585    | 5452   | 6761   | 776  | 181   | -307 | N |
| ATOM   | 325 | CZ  | ARG | A | 98 | -13.252 | 20.572 | 20.448 | 1.00 | 51.95 | C    |   |
| ANISOU | 325 | CZ  | ARG | A | 98 | 6148    | 6048   | 7543   | 808  | 248   | -192 | C |
| ATOM   | 326 | NH1 | ARG | A | 98 | -14.119 | 21.356 | 19.826 | 1.00 | 57.85 | N    |   |
| ANISOU | 326 | NH1 | ARG | A | 98 | 6889    | 6877   | 8214   | 814  | 252   | -201 | N |
| ATOM   | 327 | NH2 | ARG | A | 98 | -13.689 | 19.619 | 21.258 | 1.00 | 50.90 | N    |   |
| ANISOU | 327 | NH2 | ARG | A | 98 | 5927    | 5784   | 7631   | 843  | 320   | -52  | N |
| ATOM   | 328 | C   | ARG | A | 98 | -8.461  | 25.681 | 18.852 | 1.00 | 23.73 | C    |   |
| ANISOU | 328 | C   | ARG | A | 98 | 3193    | 2878   | 2947   | 629  | 136   | -557 | C |
| ATOM   | 329 | O   | ARG | A | 98 | -7.296  | 25.805 | 19.200 | 1.00 | 22.37 | O    |   |
| ANISOU | 329 | O   | ARG | A | 98 | 3057    | 2710   | 2734   | 581  | 102   | -612 | O |
| ATOM   | 330 | N   | PHE | A | 99 | -8.887  | 26.017 | 17.640 | 1.00 | 20.69 | N    |   |
| ANISOU | 330 | N   | PHE | A | 99 | 2708    | 2725   | 2427   | 415  | 245   | 1    | N |

|        |     |     |     |   |     |         |        |        |      |       |      |   |
|--------|-----|-----|-----|---|-----|---------|--------|--------|------|-------|------|---|
| ATOM   | 331 | CA  | PHE | A | 99  | -7.968  | 26.493 | 16.617 | 1.00 | 17.84 |      | C |
| ANISOU | 331 | CA  | PHE | A | 99  | 2438    | 2298   | 2043   | 383  | 203   | 23   | C |
| ATOM   | 332 | CB  | PHE | A | 99  | -8.636  | 26.421 | 15.241 | 1.00 | 17.74 |      | C |
| ANISOU | 332 | CB  | PHE | A | 99  | 2403    | 2301   | 2036   | 415  | 165   | -3   | C |
| ATOM   | 333 | CG  | PHE | A | 99  | -9.043  | 25.025 | 14.855 | 1.00 | 18.65 |      | C |
| ANISOU | 333 | CG  | PHE | A | 99  | 2399    | 2474   | 2212   | 373  | 195   | -9   | C |
| ATOM   | 334 | CD1 | PHE | A | 99  | -8.181  | 24.218 | 14.133 | 1.00 | 16.98 |      | C |
| ANISOU | 334 | CD1 | PHE | A | 99  | 2184    | 2245   | 2022   | 297  | 203   | 20   | C |
| ATOM   | 335 | CE1 | PHE | A | 99  | -8.534  | 22.927 | 13.798 | 1.00 | 18.28 |      | C |
| ANISOU | 335 | CE1 | PHE | A | 99  | 2256    | 2455   | 2234   | 261  | 221   | 17   | C |
| ATOM   | 336 | CZ  | PHE | A | 99  | -9.759  | 22.428 | 14.187 | 1.00 | 19.24 |      | C |
| ANISOU | 336 | CZ  | PHE | A | 99  | 2279    | 2643   | 2386   | 287  | 237   | -15  | C |
| ATOM   | 337 | CE2 | PHE | A | 99  | -10.627 | 23.218 | 14.918 | 1.00 | 21.45 |      | C |
| ANISOU | 337 | CE2 | PHE | A | 99  | 2548    | 2953   | 2648   | 359  | 237   | -45  | C |
| ATOM   | 338 | CD2 | PHE | A | 99  | -10.265 | 24.510 | 15.253 | 1.00 | 22.48 |      | C |
| ANISOU | 338 | CD2 | PHE | A | 99  | 2779    | 3037   | 2727   | 408  | 215   | -43  | C |
| ATOM   | 339 | C   | PHE | A | 99  | -7.487  | 27.905 | 16.913 | 1.00 | 18.89 |      | C |
| ANISOU | 339 | C   | PHE | A | 99  | 2704    | 2362   | 2112   | 419  | 162   | 34   | C |
| ATOM   | 340 | O   | PHE | A | 99  | -6.307  | 28.216 | 16.761 | 1.00 | 20.86 |      | O |
| ANISOU | 340 | O   | PHE | A | 99  | 3032    | 2553   | 2343   | 357  | 152   | 70   | O |
| ATOM   | 341 | N   | ILE | A | 100 | -8.415  | 28.754 | 17.328 | 1.00 | 19.63 |      | N |
| ANISOU | 341 | N   | ILE | A | 100 | 2824    | 2467   | 2168   | 518  | 133   | 1    | N |
| ATOM   | 342 | CA  | ILE | A | 100 | -8.096  | 30.126 | 17.695 | 1.00 | 22.64 |      | C |
| ANISOU | 342 | CA  | ILE | A | 100 | 3343    | 2779   | 2479   | 564  | 84    | 7    | C |
| ATOM   | 343 | CB  | ILE | A | 100 | -9.375  | 30.892 | 18.085 | 1.00 | 23.80 |      | C |
| ANISOU | 343 | CB  | ILE | A | 100 | 3499    | 2960   | 2583   | 697  | 51    | -41  | C |
| ATOM   | 344 | CG1 | ILE | A | 100 | -10.218 | 31.161 | 16.834 | 1.00 | 24.34 |      | C |
| ANISOU | 344 | CG1 | ILE | A | 100 | 3566    | 3047   | 2636   | 760  | 2     | -84  | C |
| ATOM   | 345 | CD1 | ILE | A | 100 | -11.631 | 31.597 | 17.128 | 1.00 | 28.36 |      | C |
| ANISOU | 345 | CD1 | ILE | A | 100 | 4039    | 3623   | 3115   | 893  | -22   | -142 | C |
| ATOM   | 346 | CG2 | ILE | A | 100 | -9.035  | 32.193 | 18.793 | 1.00 | 26.87 |      | C |
| ANISOU | 346 | CG2 | ILE | A | 100 | 4034    | 3280   | 2897   | 748  | 3     | -31  | C |
| ATOM   | 347 | C   | ILE | A | 100 | -7.070  | 30.185 | 18.833 | 1.00 | 18.72 |      | C |
| ANISOU | 347 | C   | ILE | A | 100 | 2890    | 2242   | 1980   | 509  | 111   | 48   | C |
| ATOM   | 348 | O   | ILE | A | 100 | -6.069  | 30.893 | 18.735 | 1.00 | 21.51 |      | O |
| ANISOU | 348 | O   | ILE | A | 100 | 3355    | 2521   | 2298   | 467  | 79    | 79   | O |
| ATOM   | 349 | N   | ARG | A | 101 | -7.304  | 29.429 | 19.900 | 1.00 | 19.27 |      | N |
| ANISOU | 349 | N   | ARG | A | 101 | 2875    | 2359   | 2088   | 505  | 169   | 46   | N |
| ATOM   | 350 | CA  | ARG | A | 101 | -6.400  | 29.471 | 21.047 | 1.00 | 18.93 |      | C |
| ANISOU | 350 | CA  | ARG | A | 101 | 2875    | 2275   | 2042   | 465  | 192   | 78   | C |
| ATOM   | 351 | CB  | ARG | A | 101 | -7.029  | 28.820 | 22.283 | 1.00 | 20.30 |      | C |
| ANISOU | 351 | CB  | ARG | A | 101 | 2965    | 2504   | 2243   | 495  | 251   | 64   | C |
| ATOM   | 352 | CG  | ARG | A | 101 | -8.277  | 29.548 | 22.772 | 1.00 | 21.39 |      | C |
| ANISOU | 352 | CG  | ARG | A | 101 | 3106    | 2680   | 2342   | 621  | 232   | 28   | C |
| ATOM   | 353 | CD  | ARG | A | 101 | -8.841  | 28.923 | 24.026 | 1.00 | 21.22 |      | C |
| ANISOU | 353 | CD  | ARG | A | 101 | 3004    | 2716   | 2341   | 645  | 296   | 19   | C |
| ATOM   | 354 | NE  | ARG | A | 101 | -7.974  | 29.143 | 25.178 | 1.00 | 19.45 |      | N |
| ANISOU | 354 | NE  | ARG | A | 101 | 2855    | 2430   | 2105   | 629  | 308   | 49   | N |
| ATOM   | 355 | CZ  | ARG | A | 101 | -7.220  | 28.204 | 25.741 | 1.00 | 25.27 |      | C |
| ANISOU | 355 | CZ  | ARG | A | 101 | 3560    | 3156   | 2885   | 545  | 361   | 71   | C |
| ATOM   | 356 | NH1 | ARG | A | 101 | -7.220  | 26.963 | 25.261 | 1.00 | 21.91 |      | N |
| ANISOU | 356 | NH1 | ARG | A | 101 | 3035    | 2777   | 2514   | 467  | 406   | 69   | N |
| ATOM   | 357 | NH2 | ARG | A | 101 | -6.466  | 28.508 | 26.787 | 1.00 | 25.15 |      | N |
| ANISOU | 357 | NH2 | ARG | A | 101 | 3622    | 3080   | 2855   | 542  | 364   | 92   | N |
| ATOM   | 358 | C   | ARG | A | 101 | -5.053  | 28.845 | 20.708 | 1.00 | 23.12 |      | C |
| ANISOU | 358 | C   | ARG | A | 101 | 3407    | 2775   | 2602   | 347  | 213   | 115  | C |
| ATOM   | 359 | O   | ARG | A | 101 | -4.006  | 29.346 | 21.127 | 1.00 | 19.24 |      | O |
| ANISOU | 359 | O   | ARG | A | 101 | 2998    | 2222   | 2088   | 306  | 198   | 146  | O |
| ATOM   | 360 | N   | ALA | A | 102 | -5.072  | 27.763 | 19.933 | 1.00 | 17.88 |      | N |
| ANISOU | 360 | N   | ALA | A | 102 | 2653    | 2156   | 1985   | 296  | 242   | 113  | N |
| ATOM   | 361 | CA  | ALA | A | 102 | -3.825  | 27.128 | 19.519 | 1.00 | 19.13 |      | C |
| ANISOU | 361 | CA  | ALA | A | 102 | 2808    | 2299   | 2164   | 196  | 258   | 144  | C |
| ATOM   | 362 | CB  | ALA | A | 102 | -4.103  | 25.863 | 18.717 | 1.00 | 20.63 |      | C |
| ANISOU | 362 | CB  | ALA | A | 102 | 2896    | 2544   | 2398   | 162  | 286   | 135  | C |
| ATOM   | 363 | C   | ALA | A | 102 | -2.932  | 28.073 | 18.720 | 1.00 | 17.80 |      | C |
| ANISOU | 363 | C   | ALA | A | 102 | 2742    | 2069   | 1952   | 162  | 209   | 170  | C |
| ATOM   | 364 | O   | ALA | A | 102 | -1.732  | 27.835 | 18.586 | 1.00 | 21.15 |      | O |
| ANISOU | 364 | O   | ALA | A | 102 | 3180    | 2476   | 2378   | 82   | 219   | 201  | O |
| ATOM   | 365 | N   | ARG | A | 103 | -3.514  | 29.139 | 18.180 | 1.00 | 18.24 |      | N |
| ANISOU | 365 | N   | ARG | A | 103 | 2871    | 2097   | 1963   | 223  | 156   | 157  | N |

|        |     |     |     |   |     |        |        |        |      |       |     |   |
|--------|-----|-----|-----|---|-----|--------|--------|--------|------|-------|-----|---|
| ATOM   | 366 | CA  | ARG | A | 103 | -2.742 | 30.093 | 17.387 | 1.00 | 18.08 |     | C |
| ANISOU | 366 | CA  | ARG | A | 103 | 2962   | 2014   | 1894   | 188  | 106   | 183 | C |
| ATOM   | 367 | CB  | ARG | A | 103 | -3.214 | 30.097 | 15.926 | 1.00 | 20.09 |     | C |
| ANISOU | 367 | CB  | ARG | A | 103 | 3214   | 2278   | 2141   | 205  | 81    | 168 | C |
| ATOM   | 368 | CG  | ARG | A | 103 | -2.760 | 28.867 | 15.140 | 1.00 | 20.54 |     | C |
| ANISOU | 368 | CG  | ARG | A | 103 | 3179   | 2379   | 2246   | 139  | 120   | 179 | C |
| ATOM   | 369 | CD  | ARG | A | 103 | -1.247 | 28.774 | 15.164 | 1.00 | 26.85 |     | C |
| ANISOU | 369 | CD  | ARG | A | 103 | 4005   | 3159   | 3038   | 38   | 136   | 224 | C |
| ATOM   | 370 | NE  | ARG | A | 103 | -0.718 | 27.627 | 14.432 | 1.00 | 26.56 |     | N |
| ANISOU | 370 | NE  | ARG | A | 103 | 3889   | 3167   | 3036   | -17  | 169   | 236 | N |
| ATOM   | 371 | CZ  | ARG | A | 103 | -0.127 | 26.586 | 15.010 | 1.00 | 26.93 |     | C |
| ANISOU | 371 | CZ  | ARG | A | 103 | 3863   | 3252   | 3118   | -63  | 214   | 244 | C |
| ATOM   | 372 | NH1 | ARG | A | 103 | 0.001  | 26.535 | 16.333 | 1.00 | 21.60 |     | N |
| ANISOU | 372 | NH1 | ARG | A | 103 | 3181   | 2573   | 2454   | -63  | 235   | 242 | N |
| ATOM   | 373 | NH2 | ARG | A | 103 | 0.335  | 25.594 | 14.264 | 1.00 | 25.65 |     | N |
| ANISOU | 373 | NH2 | ARG | A | 103 | 3642   | 3129   | 2974   | -101 | 234   | 253 | N |
| ATOM   | 374 | C   | ARG | A | 103 | -2.767 | 31.499 | 17.995 | 1.00 | 21.70 |     | C |
| ANISOU | 374 | C   | ARG | A | 103 | 3553   | 2406   | 2288   | 234  | 52    | 186 | C |
| ATOM   | 375 | O   | ARG | A | 103 | -2.591 | 32.493 | 17.294 | 1.00 | 24.61 |     | O |
| ANISOU | 375 | O   | ARG | A | 103 | 4031   | 2719   | 2600   | 235  | -4    | 195 | O |
| ATOM   | 376 | N   | LYS | A | 104 | -2.974 | 31.562 | 19.308 | 1.00 | 23.23 |     | N |
| ANISOU | 376 | N   | LYS | A | 104 | 3743   | 2600   | 2485   | 273  | 67    | 181 | N |
| ATOM   | 377 | CA  | LYS | A | 104 | -2.906 | 32.818 | 20.059 | 1.00 | 25.62 |     | C |
| ANISOU | 377 | CA  | LYS | A | 104 | 4175   | 2835   | 2725   | 319  | 13    | 188 | C |
| ATOM   | 378 | CB  | LYS | A | 104 | -1.458 | 33.296 | 20.159 | 1.00 | 26.54 |     | C |
| ANISOU | 378 | CB  | LYS | A | 104 | 4380   | 2885   | 2820   | 219  | -7    | 236 | C |
| ATOM   | 379 | CG  | LYS | A | 104 | -0.578 | 32.353 | 20.956 | 1.00 | 29.52 |     | C |
| ANISOU | 379 | CG  | LYS | A | 104 | 4680   | 3285   | 3253   | 146  | 52    | 255 | C |
| ATOM   | 380 | CD  | LYS | A | 104 | 0.893  | 32.662 | 20.770 | 1.00 | 40.65 |     | C |
| ANISOU | 380 | CD  | LYS | A | 104 | 6146   | 4651   | 4647   | 34   | 36    | 299 | C |
| ATOM   | 381 | CE  | LYS | A | 104 | 1.754  | 31.515 | 21.283 | 1.00 | 46.71 |     | C |
| ANISOU | 381 | CE  | LYS | A | 104 | 6817   | 5460   | 5472   | -35  | 97    | 308 | C |
| ATOM   | 382 | NZ  | LYS | A | 104 | 1.485  | 30.231 | 20.563 | 1.00 | 49.16 |     | N |
| ANISOU | 382 | NZ  | LYS | A | 104 | 7001   | 5847   | 5832   | -49  | 150   | 291 | N |
| ATOM   | 383 | C   | LYS | A | 104 | -3.804 | 33.920 | 19.495 | 1.00 | 27.12 |     | C |
| ANISOU | 383 | C   | LYS | A | 104 | 4461   | 2998   | 2848   | 414  | -56   | 161 | C |
| ATOM   | 384 | O   | LYS | A | 104 | -3.400 | 35.084 | 19.394 | 1.00 | 23.52 |     | O |
| ANISOU | 384 | O   | LYS | A | 104 | 4152   | 2464   | 2323   | 414  | -122  | 178 | O |
| ATOM   | 385 | N   | PHE | A | 105 | -5.026 | 33.536 | 19.137 | 1.00 | 23.39 |     | N |
| ANISOU | 385 | N   | PHE | A | 105 | 3907   | 2589   | 2392   | 495  | -45   | 116 | N |
| ATOM   | 386 | CA  | PHE | A | 105 | -6.055 | 34.468 | 18.673 | 1.00 | 26.40 |     | C |
| ANISOU | 386 | CA  | PHE | A | 105 | 4360   | 2961   | 2710   | 608  | -110  | 76  | C |
| ATOM   | 387 | CB  | PHE | A | 105 | -6.395 | 35.502 | 19.761 | 1.00 | 23.52 |     | C |
| ANISOU | 387 | CB  | PHE | A | 105 | 4099   | 2560   | 2279   | 703  | -156  | 67  | C |
| ATOM   | 388 | CG  | PHE | A | 105 | -7.124 | 34.910 | 20.940 | 1.00 | 25.15 |     | C |
| ANISOU | 388 | CG  | PHE | A | 105 | 4198   | 2839   | 2520   | 767  | -102  | 46  | C |
| ATOM   | 389 | CD1 | PHE | A | 105 | -8.509 | 34.859 | 20.963 | 1.00 | 30.47 |     | C |
| ANISOU | 389 | CD1 | PHE | A | 105 | 4802   | 3591   | 3185   | 885  | -102  | -7  | C |
| ATOM   | 390 | CE1 | PHE | A | 105 | -9.181 | 34.302 | 22.037 | 1.00 | 30.52 |     | C |
| ANISOU | 390 | CE1 | PHE | A | 105 | 4705   | 3672   | 3221   | 936  | -46   | -23 | C |
| ATOM   | 391 | CZ  | PHE | A | 105 | -8.472 | 33.780 | 23.102 | 1.00 | 32.10 |     | C |
| ANISOU | 391 | CZ  | PHE | A | 105 | 4879   | 3858   | 3457   | 874  | 8     | 13  | C |
| ATOM   | 392 | CE2 | PHE | A | 105 | -7.093 | 33.819 | 23.092 | 1.00 | 29.31 |     | C |
| ANISOU | 392 | CE2 | PHE | A | 105 | 4597   | 3424   | 3114   | 764  | 3     | 61  | C |
| ATOM   | 393 | CD2 | PHE | A | 105 | -6.423 | 34.378 | 22.011 | 1.00 | 25.53 |     | C |
| ANISOU | 393 | CD2 | PHE | A | 105 | 4211   | 2882   | 2608   | 709  | -51   | 79  | C |
| ATOM   | 394 | C   | PHE | A | 105 | -5.739 | 35.123 | 17.327 | 1.00 | 28.64 |     | C |
| ANISOU | 394 | C   | PHE | A | 105 | 4746   | 3187   | 2947   | 581  | -167  | 81  | C |
| ATOM   | 395 | O   | PHE | A | 105 | -6.375 | 36.103 | 16.935 | 1.00 | 27.60 |     | O |
| ANISOU | 395 | O   | PHE | A | 105 | 4720   | 3022   | 2745   | 669  | -236  | 51  | O |
| ATOM   | 396 | N   | ASN | A | 106 | -4.769 | 34.560 | 16.611 | 1.00 | 26.48 |     | N |
| ANISOU | 396 | N   | ASN | A | 106 | 4446   | 2906   | 2710   | 464  | -138  | 117 | N |
| ATOM   | 397 | CA  | ASN | A | 106 | -4.494 | 34.979 | 15.240 | 1.00 | 25.86 |     | C |
| ANISOU | 397 | CA  | ASN | A | 106 | 4443   | 2785   | 2596   | 432  | -177  | 123 | C |
| ATOM   | 398 | CB  | ASN | A | 106 | -3.039 | 34.684 | 14.871 | 1.00 | 26.58 |     | C |
| ANISOU | 398 | CB  | ASN | A | 106 | 4542   | 2852   | 2704   | 289  | -149  | 180 | C |
| ATOM   | 399 | CG  | ASN | A | 106 | -2.660 | 35.210 | 13.494 | 1.00 | 32.48 |     | C |
| ANISOU | 399 | CG  | ASN | A | 106 | 5382   | 3552   | 3405   | 248  | -187  | 194 | C |
| ATOM   | 400 | OD1 | ASN | A | 106 | -3.361 | 34.979 | 12.507 | 1.00 | 29.28 |     | O |
| ANISOU | 400 | OD1 | ASN | A | 106 | 4953   | 3166   | 3005   | 297  | -196  | 162 | O |

|        |     |     |     |   |     |         |        |        |      |       |      |   |
|--------|-----|-----|-----|---|-----|---------|--------|--------|------|-------|------|---|
| ATOM   | 401 | ND2 | ASN | A | 106 | -1.529  | 35.906 | 13.420 | 1.00 | 32.48 |      | N |
| ANISOU | 401 | ND2 | ASN | A | 106 | 5490    | 3489   | 3359   | 155  | -209  | 241  | N |
| ATOM   | 402 | C   | ASN | A | 106 | -5.452  | 34.257 | 14.302 | 1.00 | 29.05 |      | C |
| ANISOU | 402 | C   | ASN | A | 106 | 4747    | 3251   | 3039   | 483  | -163  | 81   | C |
| ATOM   | 403 | O   | ASN | A | 106 | -5.304  | 33.061 | 14.044 | 1.00 | 25.36 |      | O |
| ANISOU | 403 | O   | ASN | A | 106 | 4151    | 2842   | 2644   | 430  | -104  | 89   | O |
| ATOM   | 404 | N   | VAL | A | 107 | -6.451  | 34.980 | 13.810 | 1.00 | 26.38 |      | N |
| ANISOU | 404 | N   | VAL | A | 107 | 4474    | 2901   | 2650   | 590  | -222  | 34   | N |
| ATOM   | 405 | CA  | VAL | A | 107 | -7.545  | 34.345 | 13.089 | 1.00 | 25.99 |      | C |
| ANISOU | 405 | CA  | VAL | A | 107 | 4322    | 2916   | 2637   | 658  | -215  | -16  | C |
| ATOM   | 406 | CB  | VAL | A | 107 | -8.696  | 35.340 | 12.818 | 1.00 | 26.44 |      | C |
| ANISOU | 406 | CB  | VAL | A | 107 | 4464    | 2960   | 2622   | 799  | -291  | -77  | C |
| ATOM   | 407 | CG1 | VAL | A | 107 | -9.757  | 34.714 | 11.925 | 1.00 | 27.30 |      | C |
| ANISOU | 407 | CG1 | VAL | A | 107 | 4472    | 3133   | 2770   | 863  | -292  | -130 | C |
| ATOM   | 408 | CG2 | VAL | A | 107 | -9.315  | 35.780 | 14.139 | 1.00 | 26.64 |      | C |
| ANISOU | 408 | CG2 | VAL | A | 107 | 4489    | 3014   | 2620   | 889  | -299  | -99  | C |
| ATOM   | 409 | C   | VAL | A | 107 | -7.074  | 33.655 | 11.808 | 1.00 | 26.27 |      | C |
| ANISOU | 409 | C   | VAL | A | 107 | 4322    | 2951   | 2709   | 584  | -197  | 2    | C |
| ATOM   | 410 | O   | VAL | A | 107 | -7.432  | 32.505 | 11.556 | 1.00 | 25.98 |      | O |
| ANISOU | 410 | O   | VAL | A | 107 | 4146    | 2982   | 2744   | 572  | -152  | -9   | O |
| ATOM   | 411 | N   | GLY | A | 108 | -6.259  | 34.346 | 11.014 | 1.00 | 25.64 |      | N |
| ANISOU | 411 | N   | GLY | A | 108 | 4373    | 2794   | 2577   | 531  | -232  | 31   | N |
| ATOM   | 412 | CA  | GLY | A | 108 | -5.762  | 33.786 | 9.767  | 1.00 | 25.80 |      | C |
| ANISOU | 412 | CA  | GLY | A | 108 | 4374    | 2810   | 2620   | 467  | -216  | 51   | C |
| ATOM   | 413 | C   | GLY | A | 108 | -5.019  | 32.479 | 9.984  | 1.00 | 25.17 |      | C |
| ANISOU | 413 | C   | GLY | A | 108 | 4157    | 2787   | 2619   | 371  | -140  | 89   | C |
| ATOM   | 414 | O   | GLY | A | 108 | -5.200  | 31.514 | 9.237  | 1.00 | 22.78 |      | O |
| ANISOU | 414 | O   | GLY | A | 108 | 3763    | 2526   | 2366   | 363  | -115  | 82   | O |
| ATOM   | 415 | N   | ARG | A | 109 | -4.176  | 32.442 | 11.010 | 1.00 | 25.02 |      | N |
| ANISOU | 415 | N   | ARG | A | 109 | 4131    | 2769   | 2608   | 303  | -107  | 127  | N |
| ATOM   | 416 | CA  | ARG | A | 109 | -3.452  | 31.218 | 11.338 | 1.00 | 25.35 |      | C |
| ANISOU | 416 | CA  | ARG | A | 109 | 4052    | 2864   | 2715   | 220  | -39   | 157  | C |
| ATOM   | 417 | CB  | ARG | A | 109 | -2.339  | 31.490 | 12.354 | 1.00 | 23.15 |      | C |
| ANISOU | 417 | CB  | ARG | A | 109 | 3807    | 2564   | 2426   | 143  | -20   | 199  | C |
| ATOM   | 418 | CG  | ARG | A | 109 | -1.210  | 32.347 | 11.793 | 1.00 | 29.25 |      | C |
| ANISOU | 418 | CG  | ARG | A | 109 | 4700    | 3275   | 3140   | 63   | -47   | 242  | C |
| ATOM   | 419 | CD  | ARG | A | 109 | -0.180  | 32.707 | 12.854 | 1.00 | 37.71 |      | C |
| ANISOU | 419 | CD  | ARG | A | 109 | 5806    | 4324   | 4198   | -9   | -37   | 280  | C |
| ATOM   | 420 | NE  | ARG | A | 109 | 0.938   | 33.455 | 12.282 | 1.00 | 46.37 |      | N |
| ANISOU | 420 | NE  | ARG | A | 109 | 7005    | 5373   | 5242   | -103 | -59   | 325  | N |
| ATOM   | 421 | CZ  | ARG | A | 109 | 1.834   | 34.135 | 12.992 | 1.00 | 55.40 |      | C |
| ANISOU | 421 | CZ  | ARG | A | 109 | 8219    | 6476   | 6353   | -171 | -74   | 360  | C |
| ATOM   | 422 | NH1 | ARG | A | 109 | 1.751   | 34.176 | 14.316 | 1.00 | 58.83 |      | N |
| ANISOU | 422 | NH1 | ARG | A | 109 | 8642    | 6905   | 6804   | -146 | -71   | 354  | N |
| ATOM   | 423 | NH2 | ARG | A | 109 | 2.814   | 34.783 | 12.375 | 1.00 | 58.21 |      | N |
| ANISOU | 423 | NH2 | ARG | A | 109 | 8661    | 6796   | 6659   | -266 | -93   | 402  | N |
| ATOM   | 424 | C   | ARG | A | 109 | -4.382  | 30.111 | 11.834 | 1.00 | 20.43 |      | C |
| ANISOU | 424 | C   | ARG | A | 109 | 3284    | 2317   | 2160   | 266  | -1    | 123  | C |
| ATOM   | 425 | O   | ARG | A | 109 | -4.175  | 28.941 | 11.513 | 1.00 | 21.15 |      | O |
| ANISOU | 425 | O   | ARG | A | 109 | 3277    | 2455   | 2304   | 224  | 39    | 132  | O |
| ATOM   | 426 | N   | ALA | A | 110 | -5.401  | 30.468 | 12.613 | 1.00 | 21.53 |      | N |
| ANISOU | 426 | N   | ALA | A | 110 | 3414    | 2473   | 2295   | 352  | -15   | 86   | N |
| ATOM   | 427 | CA  | ALA | A | 110 | -6.381  | 29.473 | 13.050 | 1.00 | 21.75 |      | C |
| ANISOU | 427 | CA  | ALA | A | 110 | 3303    | 2579   | 2381   | 391  | 22    | 54   | C |
| ATOM   | 428 | CB  | ALA | A | 110 | -7.408  | 30.099 | 13.983 | 1.00 | 21.37 |      | C |
| ANISOU | 428 | CB  | ALA | A | 110 | 3259    | 2550   | 2311   | 489  | 5     | 16   | C |
| ATOM   | 429 | C   | ALA | A | 110 | -7.064  | 28.861 | 11.826 | 1.00 | 23.73 |      | C |
| ANISOU | 429 | C   | ALA | A | 110 | 3495    | 2860   | 2661   | 417  | 9     | 27   | C |
| ATOM   | 430 | O   | ALA | A | 110 | -7.327  | 27.652 | 11.767 | 1.00 | 18.40 |      | O |
| ANISOU | 430 | O   | ALA | A | 110 | 2703    | 2242   | 2045   | 392  | 46    | 23   | O |
| ATOM   | 431 | N   | TYR | A | 111 | -7.340  | 29.707 | 10.841 | 1.00 | 19.11 |      | N |
| ANISOU | 431 | N   | TYR | A | 111 | 3002    | 2230   | 2028   | 468  | -49   | 8    | N |
| ATOM   | 432 | CA  | TYR | A | 111 | -7.995  | 29.254 | 9.620  | 1.00 | 18.58 |      | C |
| ANISOU | 432 | CA  | TYR | A | 111 | 2897    | 2179   | 1983   | 503  | -71   | -21  | C |
| ATOM   | 433 | CB  | TYR | A | 111 | -8.413  | 30.437 | 8.741  | 1.00 | 17.50 |      | C |
| ANISOU | 433 | CB  | TYR | A | 111 | 2888    | 1982   | 1779   | 580  | -143  | -53  | C |
| ATOM   | 434 | CG  | TYR | A | 111 | -9.028  | 30.004 | 7.425  | 1.00 | 25.17 |      | C |
| ANISOU | 434 | CG  | TYR | A | 111 | 3832    | 2960   | 2770   | 621  | -171  | -84  | C |
| ATOM   | 435 | CD1 | TYR | A | 111 | -10.291 | 29.428 | 7.385  | 1.00 | 26.61 |      | C |
| ANISOU | 435 | CD1 | TYR | A | 111 | 3904    | 3211   | 2997   | 691  | -177  | -136 | C |

|        |     |     |     |   |     |         |        |        |      |       |      |   |
|--------|-----|-----|-----|---|-----|---------|--------|--------|------|-------|------|---|
| ATOM   | 436 | CE1 | TYR | A | 111 | -10.857 | 29.025 | 6.184  | 1.00 | 19.39 |      | C |
| ANISOU | 436 | CE1 | TYR | A | 111 | 2966    | 2298   | 2104   | 729  | -209  | -166 | C |
| ATOM   | 437 | CZ  | TYR | A | 111 | -10.156 | 29.182 | 5.006  | 1.00 | 23.83 |      | C |
| ANISOU | 437 | CZ  | TYR | A | 111 | 3621    | 2792   | 2640   | 703  | -231  | -142 | C |
| ATOM   | 438 | OH  | TYR | A | 111 | -10.721 | 28.772 | 3.809  | 1.00 | 23.98 |      | O |
| ANISOU | 438 | OH  | TYR | A | 111 | 3623    | 2807   | 2679   | 748  | -266  | -172 | O |
| ATOM   | 439 | CE2 | TYR | A | 111 | -8.898  | 29.747 | 5.017  | 1.00 | 23.78 |      | C |
| ANISOU | 439 | CE2 | TYR | A | 111 | 3722    | 2725   | 2587   | 630  | -219  | -89  | C |
| ATOM   | 440 | CD2 | TYR | A | 111 | -8.341  | 30.159 | 6.226  | 1.00 | 26.63 |      | C |
| ANISOU | 440 | CD2 | TYR | A | 111 | 4102    | 3087   | 2930   | 587  | -191  | -60  | C |
| ATOM   | 441 | C   | TYR | A | 111 | -7.106  | 28.301 | 8.836  | 1.00 | 22.34 |      | C |
| ANISOU | 441 | C   | TYR | A | 111 | 3339    | 2656   | 2494   | 416  | -42   | 18   | C |
| ATOM   | 442 | O   | TYR | A | 111 | -7.589  | 27.343 | 8.232  | 1.00 | 21.19 |      | O |
| ANISOU | 442 | O   | TYR | A | 111 | 3108    | 2549   | 2395   | 424  | -36   | 3    | O |
| ATOM   | 443 | N   | GLU | A | 112 | -5.803  | 28.563 | 8.842  | 1.00 | 21.88 |      | N |
| ANISOU | 443 | N   | GLU | A | 112 | 3348    | 2557   | 2408   | 336  | -27   | 68   | N |
| ATOM   | 444 | CA  | GLU | A | 112 | -4.871  | 27.674 | 8.162  | 1.00 | 22.14 |      | C |
| ANISOU | 444 | CA  | GLU | A | 112 | 3347    | 2601   | 2464   | 259  | 2     | 106  | C |
| ATOM   | 445 | CB  | GLU | A | 112 | -3.460  | 28.273 | 8.134  | 1.00 | 26.84 |      | C |
| ANISOU | 445 | CB  | GLU | A | 112 | 4032    | 3154   | 3014   | 177  | 11    | 158  | C |
| ATOM   | 446 | CG  | GLU | A | 112 | -2.423  | 27.377 | 7.470  | 1.00 | 35.19 |      | C |
| ANISOU | 446 | CG  | GLU | A | 112 | 5050    | 4235   | 4086   | 103  | 43    | 196  | C |
| ATOM   | 447 | CD  | GLU | A | 112 | -2.829  | 26.953 | 6.068  | 1.00 | 48.19 |      | C |
| ANISOU | 447 | CD  | GLU | A | 112 | 6691    | 5880   | 5738   | 140  | 21    | 184  | C |
| ATOM   | 448 | OE1 | GLU | A | 112 | -3.356  | 27.802 | 5.317  | 1.00 | 51.31 |      | O |
| ANISOU | 448 | OE1 | GLU | A | 112 | 7173    | 6226   | 6096   | 193  | -25   | 163  | O |
| ATOM   | 449 | OE2 | GLU | A | 112 | -2.621  | 25.768 | 5.720  | 1.00 | 54.24 |      | O |
| ANISOU | 449 | OE2 | GLU | A | 112 | 7377    | 6690   | 6542   | 121  | 45    | 194  | O |
| ATOM   | 450 | C   | GLU | A | 112 | -4.870  | 26.287 | 8.806  | 1.00 | 22.83 |      | C |
| ANISOU | 450 | C   | GLU | A | 112 | 3303    | 2755   | 2616   | 223  | 54    | 112  | C |
| ATOM   | 451 | O   | GLU | A | 112 | -4.829  | 25.275 | 8.099  | 1.00 | 16.82 |      | O |
| ANISOU | 451 | O   | GLU | A | 112 | 2484    | 2021   | 1887   | 207  | 62    | 116  | O |
| ATOM   | 452 | N   | LEU | A | 113 | -4.920  | 26.236 | 10.139 | 1.00 | 19.56 |      | N |
| ANISOU | 452 | N   | LEU | A | 113 | 2854    | 2363   | 2216   | 214  | 83    | 111  | N |
| ATOM   | 453 | CA  | LEU | A | 113 | -5.023  | 24.957 | 10.841 | 1.00 | 21.88 |      | C |
| ANISOU | 453 | CA  | LEU | A | 113 | 3035    | 2714   | 2564   | 183  | 130   | 111  | C |
| ATOM   | 454 | CB  | LEU | A | 113 | -5.015  | 25.141 | 12.365 | 1.00 | 19.70 |      | C |
| ANISOU | 454 | CB  | LEU | A | 113 | 2746    | 2448   | 2291   | 177  | 161   | 111  | C |
| ATOM   | 455 | CG  | LEU | A | 113 | -3.687  | 25.430 | 13.064 | 1.00 | 25.16 |      | C |
| ANISOU | 455 | CG  | LEU | A | 113 | 3490    | 3110   | 2960   | 112  | 182   | 150  | C |
| ATOM   | 456 | CD1 | LEU | A | 113 | -3.880  | 25.390 | 14.581 | 1.00 | 24.26 |      | C |
| ANISOU | 456 | CD1 | LEU | A | 113 | 3351    | 3010   | 2859   | 119  | 214   | 143  | C |
| ATOM   | 457 | CD2 | LEU | A | 113 | -2.603  | 24.454 | 12.616 | 1.00 | 22.29 |      | C |
| ANISOU | 457 | CD2 | LEU | A | 113 | 3095    | 2763   | 2609   | 37   | 208   | 180  | C |
| ATOM   | 458 | C   | LEU | A | 113 | -6.301  | 24.233 | 10.460 | 1.00 | 22.53 |      | C |
| ANISOU | 458 | C   | LEU | A | 113 | 3031    | 2842   | 2688   | 232  | 121   | 73   | C |
| ATOM   | 459 | O   | LEU | A | 113 | -6.304  | 23.025 | 10.250 | 1.00 | 20.63 |      | O |
| ANISOU | 459 | O   | LEU | A | 113 | 2717    | 2636   | 2486   | 199  | 139   | 78   | O |
| ATOM   | 460 | N   | LEU | A | 114 | -7.395  | 24.984 | 10.402 | 1.00 | 21.08 |      | N |
| ANISOU | 460 | N   | LEU | A | 114 | 2858    | 2659   | 2492   | 313  | 87    | 32   | N |
| ATOM   | 461 | CA  | LEU | A | 114 | -8.697  | 24.428 | 10.070 | 1.00 | 17.75 |      | C |
| ANISOU | 461 | CA  | LEU | A | 114 | 2348    | 2287   | 2107   | 364  | 73    | -10  | C |
| ATOM   | 462 | CB  | LEU | A | 114 | -9.762  | 25.527 | 10.180 | 1.00 | 21.43 |      | C |
| ANISOU | 462 | CB  | LEU | A | 114 | 2843    | 2757   | 2544   | 464  | 34    | -58  | C |
| ATOM   | 463 | CG  | LEU | A | 114 | -11.226 | 25.100 | 10.146 | 1.00 | 27.27 |      | C |
| ANISOU | 463 | CG  | LEU | A | 114 | 3475    | 3567   | 3318   | 525  | 24    | -109 | C |
| ATOM   | 464 | CD1 | LEU | A | 114 | -11.512 | 24.110 | 11.270 | 1.00 | 27.19 |      | C |
| ANISOU | 464 | CD1 | LEU | A | 114 | 3350    | 3626   | 3354   | 477  | 83    | -102 | C |
| ATOM   | 465 | CD2 | LEU | A | 114 | -12.148 | 26.320 | 10.250 | 1.00 | 22.59 |      | C |
| ANISOU | 465 | CD2 | LEU | A | 114 | 2926    | 2979   | 2680   | 637  | -21   | -160 | C |
| ATOM   | 466 | C   | LEU | A | 114 | -8.705  | 23.790 | 8.674  | 1.00 | 18.67 |      | C |
| ANISOU | 466 | C   | LEU | A | 114 | 2456    | 2396   | 2243   | 360  | 45    | -9   | C |
| ATOM   | 467 | O   | LEU | A | 114 | -9.319  | 22.744 | 8.463  | 1.00 | 18.47 |      | O |
| ANISOU | 467 | O   | LEU | A | 114 | 2339    | 2414   | 2263   | 353  | 49    | -22  | O |
| ATOM   | 468 | N   | ARG | A | 115 | -8.016  | 24.417 | 7.724  | 1.00 | 16.78 |      | N |
| ANISOU | 468 | N   | ARG | A | 115 | 2316    | 2097   | 1964   | 361  | 16    | 8    | N |
| ATOM   | 469 | CA  | ARG | A | 115 | -7.910  | 23.873 | 6.371  | 1.00 | 18.93 |      | C |
| ANISOU | 469 | CA  | ARG | A | 115 | 2594    | 2354   | 2245   | 362  | -10   | 13   | C |
| ATOM   | 470 | CB  | ARG | A | 115 | -7.137  | 24.839 | 5.464  | 1.00 | 20.28 |      | C |
| ANISOU | 470 | CB  | ARG | A | 115 | 2892    | 2455   | 2358   | 366  | -38   | 32   | C |



|        |     |     |     |   |     |         |        |        |      |       |      |   |
|--------|-----|-----|-----|---|-----|---------|--------|--------|------|-------|------|---|
| ATOM   | 471 | CG  | ARG | A | 115 | -7.956  | 26.039 | 5.017  | 1.00 | 18.71 |      | C |
| ANISOU | 471 | CG  | ARG | A | 115 | 2774    | 2217   | 2119   | 454  | -93   | -12  | C |
| ATOM   | 472 | CD  | ARG | A | 115 | -7.091  | 27.064 | 4.285  | 1.00 | 21.04 |      | C |
| ANISOU | 472 | CD  | ARG | A | 115 | 3213    | 2436   | 2346   | 441  | -116  | 14   | C |
| ATOM   | 473 | NE  | ARG | A | 115 | -6.523  | 26.547 | 3.042  | 1.00 | 29.20 |      | N |
| ANISOU | 473 | NE  | ARG | A | 115 | 4266    | 3449   | 3379   | 417  | -120  | 39   | N |
| ATOM   | 474 | CZ  | ARG | A | 115 | -7.159  | 26.545 | 1.875  | 1.00 | 33.13 |      | C |
| ANISOU | 474 | CZ  | ARG | A | 115 | 4793    | 3920   | 3874   | 483  | -166  | 9    | C |
| ATOM   | 475 | NH1 | ARG | A | 115 | -8.396  | 27.019 | 1.792  | 1.00 | 35.24 |      | N |
| ANISOU | 475 | NH1 | ARG | A | 115 | 5064    | 4183   | 4142   | 575  | -213  | -52  | N |
| ATOM   | 476 | NH2 | ARG | A | 115 | -6.563  | 26.061 | 0.792  | 1.00 | 29.88 |      | N |
| ANISOU | 476 | NH2 | ARG | A | 115 | 4405    | 3490   | 3459   | 462  | -167  | 37   | N |
| ATOM   | 477 | C   | ARG | A | 115 | -7.262  | 22.483 | 6.353  | 1.00 | 21.86 |      | C |
| ANISOU | 477 | C   | ARG | A | 115 | 2900    | 2754   | 2651   | 291  | 24    | 47   | C |
| ATOM   | 478 | O   | ARG | A | 115 | -7.748  | 21.574 | 5.681  | 1.00 | 20.63 |      | O |
| ANISOU | 478 | O   | ARG | A | 115 | 2691    | 2617   | 2528   | 301  | 6     | 36   | O |
| ATOM   | 479 | N   | GLY | A | 116 | -6.180  | 22.316 | 7.109  | 1.00 | 17.48 |      | N |
| ANISOU | 479 | N   | GLY | A | 116 | 2353    | 2203   | 2085   | 223  | 67    | 84   | N |
| ATOM   | 480 | CA  | GLY | A | 116 | -5.504  | 21.029 | 7.183  | 1.00 | 17.40 |      | C |
| ANISOU | 480 | CA  | GLY | A | 116 | 2292    | 2222   | 2097   | 163  | 95    | 112  | C |
| ATOM   | 481 | C   | GLY | A | 116 | -6.368  | 19.969 | 7.847  | 1.00 | 14.97 |      | C |
| ANISOU | 481 | C   | GLY | A | 116 | 1886    | 1964   | 1838   | 156  | 110   | 92   | C |
| ATOM   | 482 | O   | GLY | A | 116 | -6.361  | 18.797 | 7.456  | 1.00 | 17.20 |      | O |
| ANISOU | 482 | O   | GLY | A | 116 | 2127    | 2265   | 2142   | 134  | 105   | 99   | O |
| ATOM   | 483 | N   | TYR | A | 117 | -7.106  | 20.390 | 8.867  | 1.00 | 17.51 |      | N |
| ANISOU | 483 | N   | TYR | A | 117 | 2175    | 2306   | 2172   | 174  | 127   | 68   | N |
| ATOM   | 484 | CA  | TYR | A | 117 | -8.024  | 19.516 | 9.591  | 1.00 | 20.23 |      | C |
| ANISOU | 484 | CA  | TYR | A | 117 | 2424    | 2703   | 2558   | 163  | 146   | 48   | C |
| ATOM   | 485 | CB  | TYR | A | 117 | -8.646  | 20.309 | 10.739 | 1.00 | 19.44 |      | C |
| ANISOU | 485 | CB  | TYR | A | 117 | 2308    | 2624   | 2454   | 193  | 169   | 25   | C |
| ATOM   | 486 | CG  | TYR | A | 117 | -9.666  | 19.569 | 11.562 | 1.00 | 17.00 |      | C |
| ANISOU | 486 | CG  | TYR | A | 117 | 1898    | 2378   | 2183   | 183  | 196   | 4    | C |
| ATOM   | 487 | CD1 | TYR | A | 117 | -9.291  | 18.838 | 12.684 | 1.00 | 18.24 |      | C |
| ANISOU | 487 | CD1 | TYR | A | 117 | 2027    | 2553   | 2349   | 121  | 247   | 22   | C |
| ATOM   | 488 | CE1 | TYR | A | 117 | -10.240 | 18.175 | 13.453 | 1.00 | 22.43 |      | C |
| ANISOU | 488 | CE1 | TYR | A | 117 | 2470    | 3143   | 2909   | 104  | 276   | 5    | C |
| ATOM   | 489 | CZ  | TYR | A | 117 | -11.572 | 18.245 | 13.091 | 1.00 | 24.76 |      | C |
| ANISOU | 489 | CZ  | TYR | A | 117 | 2692    | 3487   | 3226   | 147  | 254   | -31  | C |
| ATOM   | 490 | OH  | TYR | A | 117 | -12.540 | 17.599 | 13.827 | 1.00 | 26.86 |      | O |
| ANISOU | 490 | OH  | TYR | A | 117 | 2864    | 3823   | 3520   | 122  | 285   | -47  | O |
| ATOM   | 491 | CE2 | TYR | A | 117 | -11.960 | 18.972 | 11.989 | 1.00 | 23.88 |      | C |
| ANISOU | 491 | CE2 | TYR | A | 117 | 2605    | 3361   | 3109   | 215  | 200   | -54  | C |
| ATOM   | 492 | CD2 | TYR | A | 117 | -11.015 | 19.626 | 11.234 | 1.00 | 19.19 |      | C |
| ANISOU | 492 | CD2 | TYR | A | 117 | 2110    | 2700   | 2483   | 233  | 171   | -37  | C |
| ATOM   | 493 | C   | TYR | A | 117 | -9.109  | 18.972 | 8.659  | 1.00 | 21.32 |      | C |
| ANISOU | 493 | C   | TYR | A | 117 | 2508    | 2863   | 2728   | 196  | 105   | 20   | C |
| ATOM   | 494 | O   | TYR | A | 117 | -9.410  | 17.778 | 8.653  | 1.00 | 15.93 |      | O |
| ANISOU | 494 | O   | TYR | A | 117 | 1766    | 2211   | 2078   | 159  | 108   | 22   | O |
| ATOM   | 495 | N   | VAL | A | 118 | -9.683  | 19.852 | 7.850  | 1.00 | 16.32 |      | N |
| ANISOU | 495 | N   | VAL | A | 118 | 1907    | 2210   | 2084   | 267  | 62    | -8   | N |
| ATOM   | 496 | CA  | VAL | A | 118 | -10.705 | 19.440 | 6.886  | 1.00 | 17.17 |      | C |
| ANISOU | 496 | CA  | VAL | A | 118 | 1969    | 2332   | 2220   | 308  | 14    | -39  | C |
| ATOM   | 497 | CB  | VAL | A | 118 | -11.473 | 20.662 | 6.332  | 1.00 | 19.17 |      | C |
| ANISOU | 497 | CB  | VAL | A | 118 | 2260    | 2569   | 2453   | 402  | -31   | -83  | C |
| ATOM   | 498 | CG1 | VAL | A | 118 | -12.417 | 20.247 | 5.203  | 1.00 | 18.59 |      | C |
| ANISOU | 498 | CG1 | VAL | A | 118 | 2151    | 2503   | 2410   | 450  | -87   | -118 | C |
| ATOM   | 499 | CG2 | VAL | A | 118 | -12.237 | 21.347 | 7.460  | 1.00 | 21.97 |      | C |
| ANISOU | 499 | CG2 | VAL | A | 118 | 2575    | 2969   | 2803   | 437  | -10   | -115 | C |
| ATOM   | 500 | C   | VAL | A | 118 | -10.111 | 18.619 | 5.738  | 1.00 | 16.76 |      | C |
| ANISOU | 500 | C   | VAL | A | 118 | 1947    | 2249   | 2172   | 287  | -13   | -13  | C |
| ATOM   | 501 | O   | VAL | A | 118 | -10.720 | 17.651 | 5.276  | 1.00 | 19.90 |      | O |
| ANISOU | 501 | O   | VAL | A | 118 | 2289    | 2667   | 2605   | 281  | -39   | -22  | O |
| ATOM   | 502 | N   | ASN | A | 119 | -8.924  | 19.003 | 5.281  | 1.00 | 18.38 |      | N |
| ANISOU | 502 | N   | ASN | A | 119 | 2239    | 2406   | 2337   | 277  | -10   | 20   | N |
| ATOM   | 503 | CA  | ASN | A | 119 | -8.268  | 18.289 | 4.186  | 1.00 | 16.36 |      | C |
| ANISOU | 503 | CA  | ASN | A | 119 | 2017    | 2126   | 2074   | 266  | -34   | 47   | C |
| ATOM   | 504 | CB  | ASN | A | 119 | -6.921  | 18.929 | 3.835  | 1.00 | 18.59 |      | C |
| ANISOU | 504 | CB  | ASN | A | 119 | 2390    | 2368   | 2303   | 251  | -19   | 84   | C |
| ATOM   | 505 | CG  | ASN | A | 119 | -6.356  | 18.409 | 2.513  | 1.00 | 23.32 |      | C |
| ANISOU | 505 | CG  | ASN | A | 119 | 3033    | 2943   | 2886   | 263  | -48   | 107  | C |

|        |     |     |     |   |     |         |        |        |      |       |      |   |
|--------|-----|-----|-----|---|-----|---------|--------|--------|------|-------|------|---|
| ATOM   | 506 | OD1 | ASN | A | 119 | -6.992  | 18.534 | 1.475  | 1.00 | 24.73 |      | O |
| ANISOU | 506 | OD1 | ASN | A | 119 | 3233    | 3094   | 3069   | 321  | -96   | 87   | O |
| ATOM   | 507 | ND2 | ASN | A | 119 | -5.160  | 17.829 | 2.557  | 1.00 | 25.52 |      | N |
| ANISOU | 507 | ND2 | ASN | A | 119 | 3324    | 3232   | 3138   | 216  | -22   | 148  | N |
| ATOM   | 508 | C   | ASN | A | 119 | -8.070  | 16.818 | 4.517  | 1.00 | 17.64 |      | C |
| ANISOU | 508 | C   | ASN | A | 119 | 2124    | 2320   | 2259   | 208  | -20   | 67   | C |
| ATOM   | 509 | O   | ASN | A | 119 | -8.267  | 15.943 | 3.666  | 1.00 | 16.37 |      | O |
| ANISOU | 509 | O   | ASN | A | 119 | 1954    | 2153   | 2112   | 217  | -58   | 70   | O |
| ATOM   | 510 | N   | PHE | A | 120 | -7.674  | 16.548 | 5.759  | 1.00 | 15.60 |      | N |
| ANISOU | 510 | N   | PHE | A | 120 | 1838    | 2090   | 2002   | 153  | 30    | 80   | N |
| ATOM   | 511 | CA  | PHE | A | 120 | -7.495  | 15.178 | 6.220  | 1.00 | 16.07 |      | C |
| ANISOU | 511 | CA  | PHE | A | 120 | 1858    | 2175   | 2075   | 96   | 43    | 96   | C |
| ATOM   | 512 | CB  | PHE | A | 120 | -7.010  | 15.145 | 7.672  | 1.00 | 15.59 |      | C |
| ANISOU | 512 | CB  | PHE | A | 120 | 1783    | 2135   | 2007   | 44   | 102   | 105  | C |
| ATOM   | 513 | CG  | PHE | A | 120 | -6.728  | 13.757 | 8.181  | 1.00 | 14.29 |      | C |
| ANISOU | 513 | CG  | PHE | A | 120 | 1597    | 1990   | 1844   | -13  | 114   | 119  | C |
| ATOM   | 514 | CD1 | PHE | A | 120 | -5.600  | 13.071 | 7.749  | 1.00 | 11.99 |      | C |
| ANISOU | 514 | CD1 | PHE | A | 120 | 1352    | 1685   | 1517   | -29  | 105   | 146  | C |
| ATOM   | 515 | CE1 | PHE | A | 120 | -5.335  | 11.784 | 8.206  | 1.00 | 14.82 |      | C |
| ANISOU | 515 | CE1 | PHE | A | 120 | 1708    | 2057   | 1867   | -74  | 107   | 154  | C |
| ATOM   | 516 | CZ  | PHE | A | 120 | -6.202  | 11.168 | 9.101  | 1.00 | 17.89 |      | C |
| ANISOU | 516 | CZ  | PHE | A | 120 | 2047    | 2467   | 2284   | -116 | 122   | 139  | C |
| ATOM   | 517 | CE2 | PHE | A | 120 | -7.330  | 11.851 | 9.550  | 1.00 | 18.97 |      | C |
| ANISOU | 517 | CE2 | PHE | A | 120 | 2125    | 2623   | 2459   | -107 | 140   | 115  | C |
| ATOM   | 518 | CD2 | PHE | A | 120 | -7.589  | 13.137 | 9.080  | 1.00 | 17.72 |      | C |
| ANISOU | 518 | CD2 | PHE | A | 120 | 1969    | 2456   | 2308   | -50  | 133   | 103  | C |
| ATOM   | 519 | C   | PHE | A | 120 | -8.790  | 14.390 | 6.095  | 1.00 | 16.65 |      | C |
| ANISOU | 519 | C   | PHE | A | 120 | 1859    | 2276   | 2193   | 96   | 14    | 70   | C |
| ATOM   | 520 | O   | PHE | A | 120 | -8.788  | 13.222 | 5.700  | 1.00 | 16.22 |      | O |
| ANISOU | 520 | O   | PHE | A | 120 | 1797    | 2222   | 2145   | 71   | -13   | 82   | O |
| ATOM   | 521 | N   | ARG | A | 121 | -9.901  | 15.028 | 6.445  | 1.00 | 15.66 |      | N |
| ANISOU | 521 | N   | ARG | A | 121 | 1681    | 2175   | 2093   | 124  | 15    | 35   | N |
| ATOM   | 522 | CA  | ARG | A | 121 | -11.193 | 14.365 | 6.375  | 1.00 | 17.26 |      | C |
| ANISOU | 522 | CA  | ARG | A | 121 | 1802    | 2417   | 2340   | 119  | -10   | 8    | C |
| ATOM   | 523 | CB  | ARG | A | 121 | -12.234 | 15.128 | 7.211  | 1.00 | 18.18 |      | C |
| ANISOU | 523 | CB  | ARG | A | 121 | 1849    | 2583   | 2474   | 143  | 15    | -30  | C |
| ATOM   | 524 | CG  | ARG | A | 121 | -12.150 | 14.757 | 8.689  | 1.00 | 20.21 |      | C |
| ANISOU | 524 | CG  | ARG | A | 121 | 2066    | 2879   | 2733   | 78   | 79    | -18  | C |
| ATOM   | 525 | CD  | ARG | A | 121 | -12.274 | 15.944 | 9.634  | 1.00 | 23.43 |      | C |
| ANISOU | 525 | CD  | ARG | A | 121 | 2472    | 3304   | 3125   | 114  | 120   | -34  | C |
| ATOM   | 526 | NE  | ARG | A | 121 | -11.976 | 15.521 | 11.002 | 1.00 | 23.01 |      | N |
| ANISOU | 526 | NE  | ARG | A | 121 | 2400    | 3275   | 3069   | 53   | 181   | -17  | N |
| ATOM   | 527 | CZ  | ARG | A | 121 | -10.751 | 15.462 | 11.517 | 1.00 | 20.67 |      | C |
| ANISOU | 527 | CZ  | ARG | A | 121 | 2169    | 2941   | 2745   | 19   | 212   | 15   | C |
| ATOM   | 528 | NH1 | ARG | A | 121 | -9.702  | 15.831 | 10.788 | 1.00 | 14.71 |      | N |
| ANISOU | 528 | NH1 | ARG | A | 121 | 1494    | 2132   | 1962   | 35   | 191   | 35   | N |
| ATOM   | 529 | NH2 | ARG | A | 121 | -10.575 | 15.043 | 12.764 | 1.00 | 24.25 |      | N |
| ANISOU | 529 | NH2 | ARG | A | 121 | 2606    | 3413   | 3196   | -31  | 265   | 25   | N |
| ATOM   | 530 | C   | ARG | A | 121 | -11.657 | 14.156 | 4.935  | 1.00 | 19.09 |      | C |
| ANISOU | 530 | C   | ARG | A | 121 | 2046    | 2623   | 2586   | 168  | -81   | -5   | C |
| ATOM   | 531 | O   | ARG | A | 121 | -12.374 | 13.198 | 4.646  | 1.00 | 22.25 |      | O |
| ANISOU | 531 | O   | ARG | A | 121 | 2395    | 3041   | 3016   | 145  | -115  | -12  | O |
| ATOM   | 532 | N   | LEU | A | 122 | -11.236 | 15.034 | 4.029  | 1.00 | 17.75 |      | N |
| ANISOU | 532 | N   | LEU | A | 122 | 1948    | 2406   | 2389   | 231  | -106  | -7   | N |
| ATOM   | 533 | CA  | LEU | A | 122 | -11.556 | 14.852 | 2.611  | 1.00 | 15.50 |      | C |
| ANISOU | 533 | CA  | LEU | A | 122 | 1692    | 2086   | 2112   | 284  | -174  | -17  | C |
| ATOM   | 534 | CB  | LEU | A | 122 | -11.282 | 16.134 | 1.821  | 1.00 | 16.46 |      | C |
| ANISOU | 534 | CB  | LEU | A | 122 | 1895    | 2159   | 2200   | 359  | -192  | -29  | C |
| ATOM   | 535 | CG  | LEU | A | 122 | -12.169 | 17.343 | 2.098  | 1.00 | 25.62 |      | C |
| ANISOU | 535 | CG  | LEU | A | 122 | 3040    | 3333   | 3363   | 418  | -196  | -77  | C |
| ATOM   | 536 | CD1 | LEU | A | 122 | -11.640 | 18.559 | 1.349  | 1.00 | 28.10 |      | C |
| ANISOU | 536 | CD1 | LEU | A | 122 | 3464    | 3584   | 3627   | 478  | -213  | -79  | C |
| ATOM   | 537 | CD2 | LEU | A | 122 | -13.597 | 17.029 | 1.680  | 1.00 | 30.28 |      | C |
| ANISOU | 537 | CD2 | LEU | A | 122 | 3552    | 3954   | 3997   | 459  | -247  | -127 | C |
| ATOM   | 538 | C   | LEU | A | 122 | -10.758 | 13.708 | 1.990  | 1.00 | 18.22 |      | C |
| ANISOU | 538 | C   | LEU | A | 122 | 2077    | 2403   | 2443   | 254  | -195  | 23   | C |
| ATOM   | 539 | O   | LEU | A | 122 | -11.257 | 12.988 | 1.134  | 1.00 | 19.51 |      | O |
| ANISOU | 539 | O   | LEU | A | 122 | 2234    | 2553   | 2626   | 272  | -253  | 18   | O |
| ATOM   | 540 | N   | GLN | A | 123 | -9.512  | 13.554 | 2.418  | 1.00 | 14.28 |      | N |
| ANISOU | 540 | N   | GLN | A | 123 | 1622    | 1899   | 1906   | 215  | -154  | 61   | N |

|        |     |     |     |   |     |         |        |        |      |       |     |   |
|--------|-----|-----|-----|---|-----|---------|--------|--------|------|-------|-----|---|
| ATOM   | 541 | CA  | GLN | A | 123 | -8.614  | 12.589 | 1.791  | 1.00 | 18.17 |     | C |
| ANISOU | 541 | CA  | GLN | A | 123 | 2164    | 2370   | 2369   | 204  | -175  | 97  | C |
| ATOM   | 542 | CB  | GLN | A | 123 | -7.158  | 13.028 | 1.946  | 1.00 | 19.99 |     | C |
| ANISOU | 542 | CB  | GLN | A | 123 | 2456    | 2592   | 2547   | 193  | -132  | 131 | C |
| ATOM   | 543 | CG  | GLN | A | 123 | -6.829  | 14.333 | 1.208  | 1.00 | 22.83 |     | C |
| ANISOU | 543 | CG  | GLN | A | 123 | 2876    | 2919   | 2882   | 245  | -133  | 129 | C |
| ATOM   | 544 | CD  | GLN | A | 123 | -5.337  | 14.581 | 1.117  | 1.00 | 23.93 |     | C |
| ANISOU | 544 | CD  | GLN | A | 123 | 3073    | 3054   | 2965   | 228  | -99   | 168 | C |
| ATOM   | 545 | OE1 | GLN | A | 123 | -4.595  | 14.325 | 2.066  | 1.00 | 23.23 |     | O |
| ANISOU | 545 | OE1 | GLN | A | 123 | 2970    | 2995   | 2861   | 175  | -55   | 185 | O |
| ATOM   | 546 | NE2 | GLN | A | 123 | -4.886  | 15.060 | -0.037 | 1.00 | 27.22 |     | N |
| ANISOU | 546 | NE2 | GLN | A | 123 | 3555    | 3438   | 3349   | 272  | -120  | 181 | N |
| ATOM   | 547 | C   | GLN | A | 123 | -8.798  | 11.174 | 2.323  | 1.00 | 18.77 |     | C |
| ANISOU | 547 | C   | GLN | A | 123 | 2204    | 2471   | 2459   | 143  | -183  | 108 | C |
| ATOM   | 548 | O   | GLN | A | 123 | -8.498  | 10.191 | 1.633  | 1.00 | 18.64 |     | O |
| ANISOU | 548 | O   | GLN | A | 123 | 2222    | 2434   | 2425   | 147  | -228  | 127 | O |
| ATOM   | 549 | N   | TYR | A | 124 | -9.296  | 11.074 | 3.550  | 1.00 | 14.98 |     | N |
| ANISOU | 549 | N   | TYR | A | 124 | 1660    | 2029   | 2002   | 88   | -142  | 95  | N |
| ATOM   | 550 | CA  | TYR | A | 124 | -9.490  | 9.783  | 4.191  | 1.00 | 13.27 |     | C |
| ANISOU | 550 | CA  | TYR | A | 124 | 1416    | 1833   | 1791   | 19   | -144  | 104 | C |
| ATOM   | 551 | CB  | TYR | A | 124 | -8.493  | 9.642  | 5.337  | 1.00 | 15.70 |     | C |
| ANISOU | 551 | CB  | TYR | A | 124 | 1746    | 2155   | 2066   | -31  | -83   | 123 | C |
| ATOM   | 552 | CG  | TYR | A | 124 | -7.060  | 9.783  | 4.873  | 1.00 | 16.16 |     | C |
| ANISOU | 552 | CG  | TYR | A | 124 | 1880    | 2189   | 2071   | -3   | -79   | 150 | C |
| ATOM   | 553 | CD1 | TYR | A | 124 | -6.431  | 8.741  | 4.196  | 1.00 | 15.08 |     | C |
| ANISOU | 553 | CD1 | TYR | A | 124 | 1797    | 2036   | 1897   | 5    | -122  | 172 | C |
| ATOM   | 554 | CE1 | TYR | A | 124 | -5.117  | 8.857  | 3.754  | 1.00 | 13.65 |     | C |
| ANISOU | 554 | CE1 | TYR | A | 124 | 1676    | 1849   | 1662   | 34   | -116  | 195 | C |
| ATOM   | 555 | CZ  | TYR | A | 124 | -4.415  | 10.025 | 3.993  | 1.00 | 17.31 |     | C |
| ANISOU | 555 | CZ  | TYR | A | 124 | 2147    | 2318   | 2112   | 44   | -67   | 199 | C |
| ATOM   | 556 | OH  | TYR | A | 124 | -3.106  | 10.132 | 3.564  | 1.00 | 16.12 |     | O |
| ANISOU | 556 | OH  | TYR | A | 124 | 2046    | 2173   | 1907   | 65   | -58   | 223 | O |
| ATOM   | 557 | CE2 | TYR | A | 124 | -5.023  | 11.083 | 4.655  | 1.00 | 14.97 |     | C |
| ANISOU | 557 | CE2 | TYR | A | 124 | 1810    | 2026   | 1851   | 34   | -29   | 180 | C |
| ATOM   | 558 | CD2 | TYR | A | 124 | -6.345  | 10.954 | 5.094  | 1.00 | 15.89 |     | C |
| ANISOU | 558 | CD2 | TYR | A | 124 | 1866    | 2153   | 2019   | 17   | -35   | 154 | C |
| ATOM   | 559 | C   | TYR | A | 124 | -10.915 | 9.608  | 4.707  | 1.00 | 19.14 |     | C |
| ANISOU | 559 | C   | TYR | A | 124 | 2068    | 2616   | 2587   | -15  | -146  | 75  | C |
| ATOM   | 560 | O   | TYR | A | 124 | -11.121 | 9.368  | 5.894  | 1.00 | 20.94 |     | O |
| ANISOU | 560 | O   | TYR | A | 124 | 2253    | 2880   | 2822   | -76  | -98   | 73  | O |
| ATOM   | 561 | N   | PRO | A | 125 | -11.906 | 9.704  | 3.807  | 1.00 | 23.00 |     | N |
| ANISOU | 561 | N   | PRO | A | 125 | 2526    | 3104   | 3111   | 25   | -202  | 51  | N |
| ATOM   | 562 | CA  | PRO | A | 125 | -13.317 | 9.660  | 4.206  | 1.00 | 25.22 |     | C |
| ANISOU | 562 | CA  | PRO | A | 125 | 2705    | 3436   | 3442   | 1    | -205  | 18  | C |
| ATOM   | 563 | CB  | PRO | A | 125 | -14.054 | 9.829  | 2.871  | 1.00 | 26.87 |     | C |
| ANISOU | 563 | CB  | PRO | A | 125 | 2910    | 3622   | 3677   | 69   | -282  | -7  | C |
| ATOM   | 564 | CG  | PRO | A | 125 | -13.063 | 9.306  | 1.847  | 1.00 | 27.46 |     | C |
| ANISOU | 564 | CG  | PRO | A | 125 | 3087    | 3631   | 3715   | 98   | -327  | 26  | C |
| ATOM   | 565 | CD  | PRO | A | 125 | -11.765 | 9.860  | 2.348  | 1.00 | 21.05 |     | C |
| ANISOU | 565 | CD  | PRO | A | 125 | 2335    | 2807   | 2857   | 100  | -266  | 52  | C |
| ATOM   | 566 | C   | PRO | A | 125 | -13.684 | 8.323  | 4.851  | 1.00 | 27.58 |     | C |
| ANISOU | 566 | C   | PRO | A | 125 | 2969    | 3760   | 3750   | -97  | -207  | 33  | C |
| ATOM   | 567 | O   | PRO | A | 125 | -14.633 | 8.255  | 5.635  | 1.00 | 28.01 |     | O |
| ANISOU | 567 | O   | PRO | A | 125 | 2935    | 3873   | 3835   | -145 | -180  | 14  | O |
| ATOM   | 568 | N   | GLU | A | 126 | -12.936 | 7.272  | 4.522  | 1.00 | 22.78 |     | N |
| ANISOU | 568 | N   | GLU | A | 126 | 2436    | 3111   | 3110   | -125 | -240  | 66  | N |
| ATOM   | 569 | CA  | GLU | A | 126 | -13.197 | 5.952  | 5.083  | 1.00 | 25.10 |     | C |
| ANISOU | 569 | CA  | GLU | A | 126 | 2723    | 3415   | 3399   | -219 | -251  | 82  | C |
| ATOM   | 570 | CB  | GLU | A | 126 | -12.300 | 4.884  | 4.437  | 1.00 | 24.24 |     | C |
| ANISOU | 570 | CB  | GLU | A | 126 | 2720    | 3249   | 3241   | -219 | -308  | 115 | C |
| ATOM   | 571 | CG  | GLU | A | 126 | -10.822 | 4.958  | 4.820  | 1.00 | 21.25 |     | C |
| ANISOU | 571 | CG  | GLU | A | 126 | 2422    | 2850   | 2803   | -203 | -267  | 137 | C |
| ATOM   | 572 | CD  | GLU | A | 126 | -10.060 | 6.024  | 4.055  | 1.00 | 20.80 |     | C |
| ANISOU | 572 | CD  | GLU | A | 126 | 2399    | 2772   | 2731   | -111 | -260  | 138 | C |
| ATOM   | 573 | OE1 | GLU | A | 126 | -10.647 | 6.658  | 3.154  | 1.00 | 20.02 |     | O |
| ANISOU | 573 | OE1 | GLU | A | 126 | 2278    | 2664   | 2664   | -53  | -293  | 121 | O |
| ATOM   | 574 | OE2 | GLU | A | 126 | -8.868  | 6.227  | 4.356  | 1.00 | 19.92 |     | O |
| ANISOU | 574 | OE2 | GLU | A | 126 | 2339    | 2654   | 2574   | -98  | -223  | 154 | O |
| ATOM   | 575 | C   | GLU | A | 126 | -13.043 | 5.953  | 6.608  | 1.00 | 22.08 |     | C |
| ANISOU | 575 | C   | GLU | A | 126 | 2313    | 3071   | 3006   | -288 | -168  | 85  | C |

|        |     |     |     |   |     |         |        |        |      |       |      |   |
|--------|-----|-----|-----|---|-----|---------|--------|--------|------|-------|------|---|
| ATOM   | 576 | O   | GLU | A | 126 | -13.641 | 5.130  | 7.292  | 1.00 | 23.67 |      | O |
| ANISOU | 576 | O   | GLU | A | 126 | 2479    | 3299   | 3215   | -375 | -160  | 88   | O |
| ATOM   | 577 | N   | LEU | A | 127 | -12.248 | 6.880  | 7.140  | 1.00 | 23.15 |      | N |
| ANISOU | 577 | N   | LEU | A | 127 | 2468    | 3205   | 3121   | -252 | -107  | 85   | N |
| ATOM   | 578 | CA  | LEU | A | 127 | -12.100 | 6.995  | 8.588  | 1.00 | 21.52 |      | C |
| ANISOU | 578 | CA  | LEU | A | 127 | 2240    | 3031   | 2906   | -305 | -30   | 86   | C |
| ATOM   | 579 | CB  | LEU | A | 127 | -10.830 | 7.773  | 8.944  | 1.00 | 23.42 |      | C |
| ANISOU | 579 | CB  | LEU | A | 127 | 2541    | 3247   | 3110   | -263 | 15    | 96   | C |
| ATOM   | 580 | CG  | LEU | A | 127 | -9.497  | 7.208  | 8.457  | 1.00 | 19.92 |      | C |
| ANISOU | 580 | CG  | LEU | A | 127 | 2197    | 2758   | 2615   | -250 | -11   | 122  | C |
| ATOM   | 581 | CD1 | LEU | A | 127 | -8.354  | 8.089  | 8.927  | 1.00 | 15.48 |      | C |
| ANISOU | 581 | CD1 | LEU | A | 127 | 1672    | 2186   | 2023   | -219 | 40    | 129  | C |
| ATOM   | 582 | CD2 | LEU | A | 127 | -9.305  | 5.775  | 8.942  | 1.00 | 18.39 |      | C |
| ANISOU | 582 | CD2 | LEU | A | 127 | 2044    | 2554   | 2391   | -322 | -25   | 137  | C |
| ATOM   | 583 | C   | LEU | A | 127 | -13.302 | 7.663  | 9.271  | 1.00 | 23.39 |      | C |
| ANISOU | 583 | C   | LEU | A | 127 | 2367    | 3332   | 3186   | -314 | 12    | 56   | C |
| ATOM   | 584 | O   | LEU | A | 127 | -13.451 | 7.584  | 10.489 | 1.00 | 26.29 |      | O |
| ANISOU | 584 | O   | LEU | A | 127 | 2705    | 3734   | 3551   | -367 | 73    | 56   | O |
| ATOM   | 585 | N   | PHE | A | 128 | -14.147 | 8.332  | 8.495  | 1.00 | 25.98 |      | N |
| ANISOU | 585 | N   | PHE | A | 128 | 2640    | 3681   | 3550   | -257 | -21   | 29   | N |
| ATOM   | 586 | CA  | PHE | A | 128 | -15.164 | 9.205  | 9.087  | 1.00 | 27.34 |      | C |
| ANISOU | 586 | CA  | PHE | A | 128 | 2714    | 3922   | 3752   | -237 | 18    | -5   | C |
| ATOM   | 587 | CB  | PHE | A | 128 | -14.819 | 10.676 | 8.805  | 1.00 | 25.20 |      | C |
| ANISOU | 587 | CB  | PHE | A | 128 | 2470    | 3635   | 3471   | -134 | 27    | -23  | C |
| ATOM   | 588 | CG  | PHE | A | 128 | -13.491 | 11.093 | 9.356  | 1.00 | 22.47 |      | C |
| ANISOU | 588 | CG  | PHE | A | 128 | 2209    | 3247   | 3084   | -128 | 71    | 2    | C |
| ATOM   | 589 | CD1 | PHE | A | 128 | -13.355 | 11.416 | 10.696 | 1.00 | 23.16 |      | C |
| ANISOU | 589 | CD1 | PHE | A | 128 | 2280    | 3360   | 3159   | -153 | 141   | 4    | C |
| ATOM   | 590 | CE1 | PHE | A | 128 | -12.127 | 11.791 | 11.214 | 1.00 | 22.69 |      | C |
| ANISOU | 590 | CE1 | PHE | A | 128 | 2297    | 3261   | 3064   | -149 | 176   | 26   | C |
| ATOM   | 591 | CZ  | PHE | A | 128 | -11.019 | 11.841 | 10.391 | 1.00 | 21.59 |      | C |
| ANISOU | 591 | CZ  | PHE | A | 128 | 2243    | 3064   | 2898   | -124 | 146   | 46   | C |
| ATOM   | 592 | CE2 | PHE | A | 128 | -11.142 | 11.522 | 9.054  | 1.00 | 19.11 |      | C |
| ANISOU | 592 | CE2 | PHE | A | 128 | 1944    | 2727   | 2590   | -97  | 82    | 47   | C |
| ATOM   | 593 | CD2 | PHE | A | 128 | -12.373 | 11.145 | 8.541  | 1.00 | 19.28 |      | C |
| ANISOU | 593 | CD2 | PHE | A | 128 | 1898    | 2778   | 2650   | -97  | 42    | 25   | C |
| ATOM   | 594 | C   | PHE | A | 128 | -16.588 | 8.912  | 8.628  | 1.00 | 32.47 |      | C |
| ANISOU | 594 | C   | PHE | A | 128 | 3264    | 4627   | 4448   | -249 | -23   | -33  | C |
| ATOM   | 595 | O   | PHE | A | 128 | -17.542 | 9.161  | 9.365  | 1.00 | 35.53 |      | O |
| ANISOU | 595 | O   | PHE | A | 128 | 3552    | 5092   | 4857   | -268 | 15    | -57  | O |
| ATOM   | 596 | N   | ASP | A | 129 | -16.724 | 8.386  | 7.415  | 1.00 | 33.29 |      | N |
| ANISOU | 596 | N   | ASP | A | 129 | 3392    | 4694   | 4564   | -235 | -102  | -31  | N |
| ATOM   | 597 | CA  | ASP | A | 129 | -18.030 | 8.219  | 6.782  | 1.00 | 38.50 |      | C |
| ANISOU | 597 | CA  | ASP | A | 129 | 3961    | 5397   | 5269   | -232 | -155  | -63  | C |
| ATOM   | 598 | CB  | ASP | A | 129 | -17.893 | 7.517  | 5.425  | 1.00 | 43.02 |      | C |
| ANISOU | 598 | CB  | ASP | A | 129 | 4595    | 5905   | 5847   | -216 | -249  | -51  | C |
| ATOM   | 599 | CG  | ASP | A | 129 | -17.517 | 8.472  | 4.302  | 1.00 | 50.13 |      | C |
| ANISOU | 599 | CG  | ASP | A | 129 | 5553    | 6752   | 6741   | -94  | -288  | -68  | C |
| ATOM   | 600 | OD1 | ASP | A | 129 | -17.488 | 9.702  | 4.537  | 1.00 | 49.04 |      | O |
| ANISOU | 600 | OD1 | ASP | A | 129 | 5405    | 6632   | 6597   | -26  | -250  | -94  | O |
| ATOM   | 601 | OD2 | ASP | A | 129 | -17.254 | 7.989  | 3.178  | 1.00 | 53.35 |      | O |
| ANISOU | 601 | OD2 | ASP | A | 129 | 6026    | 7098   | 7145   | -67  | -360  | -56  | O |
| ATOM   | 602 | C   | ASP | A | 129 | -19.026 | 7.461  | 7.655  | 1.00 | 40.91 |      | C |
| ANISOU | 602 | C   | ASP | A | 129 | 4163    | 5783   | 5599   | -338 | -128  | -66  | C |
| ATOM   | 603 | O   | ASP | A | 129 | -20.115 | 7.960  | 7.938  | 1.00 | 45.91 |      | O |
| ANISOU | 603 | O   | ASP | A | 129 | 4680    | 6500   | 6261   | -326 | -111  | -103 | O |
| ATOM   | 604 | N   | SER | A | 130 | -18.659 | 6.255  | 8.075  | 1.00 | 37.24 |      | N |
| ANISOU | 604 | N   | SER | A | 130 | 3741    | 5294   | 5114   | -441 | -126  | -27  | N |
| ATOM   | 605 | CA  | SER | A | 130 | -19.581 | 5.424  | 8.843  | 1.00 | 45.91 |      | C |
| ANISOU | 605 | CA  | SER | A | 130 | 4754    | 6460   | 6229   | -559 | -104  | -24  | C |
| ATOM   | 606 | CB  | SER | A | 130 | -19.838 | 4.095  | 8.126  | 1.00 | 52.77 |      | C |
| ANISOU | 606 | CB  | SER | A | 130 | 5654    | 7292   | 7103   | -636 | -187  | -2   | C |
| ATOM   | 607 | OG  | SER | A | 130 | -18.639 | 3.360  | 7.962  | 1.00 | 57.10 |      | O |
| ANISOU | 607 | OG  | SER | A | 130 | 6344    | 7748   | 7602   | -651 | -212  | 38   | O |
| ATOM   | 608 | C   | SER | A | 130 | -19.074 | 5.179  | 10.260 | 1.00 | 46.25 |      | C |
| ANISOU | 608 | C   | SER | A | 130 | 4820    | 6514   | 6237   | -629 | -17   | 0    | C |
| ATOM   | 609 | O   | SER | A | 130 | -19.244 | 4.094  | 10.818 | 1.00 | 47.56 |      | O |
| ANISOU | 609 | O   | SER | A | 130 | 4994    | 6687   | 6391   | -745 | -10   | 24   | O |
| ATOM   | 610 | N   | LEU | A | 131 | -18.451 | 6.201  | 10.836 | 1.00 | 40.99 |      | N |
| ANISOU | 610 | N   | LEU | A | 131 | 4175    | 5846   | 5553   | -560 | 44    | -7   | N |

|        |     |     |     |   |     |         |        |        |       |       |     |   |
|--------|-----|-----|-----|---|-----|---------|--------|--------|-------|-------|-----|---|
| ATOM   | 611 | CA  | LEU | A | 131 | -17.910 | 6.109  | 12.182 | 1.00  | 40.75 |     | C |
| ANISOU | 611 | CA  | LEU | A | 131 | 4174    | 5819   | 5489   | -608  | 125   | 11  | C |
| ATOM   | 612 | CB  | LEU | A | 131 | -17.284 | 7.443  | 12.592 | 1.00  | 33.55 |     | C |
| ANISOU | 612 | CB  | LEU | A | 131 | 3284    | 4899   | 4563   | -510  | 175   | -2  | C |
| ATOM   | 613 | CG  | LEU | A | 131 | -16.398 | 7.423  | 13.838 | 1.00  | 44.50 |     | C |
| ANISOU | 613 | CG  | LEU | A | 131 | 4734    | 6263   | 5912   | -538  | 247   | 19  | C |
| ATOM   | 614 | CD1 | LEU | A | 131 | -15.276 | 6.411  | 13.675 | 1.00  | 45.08 |     | C |
| ANISOU | 614 | CD1 | LEU | A | 131 | 4928    | 6254   | 5947   | -584  | 219   | 52  | C |
| ATOM   | 615 | CD2 | LEU | A | 131 | -15.834 | 8.811  | 14.112 | 1.00  | 46.06 |     | C |
| ANISOU | 615 | CD2 | LEU | A | 131 | 4954    | 6450   | 6097   | -438  | 282   | 6   | C |
| ATOM   | 616 | C   | LEU | A | 131 | -19.003 | 5.723  | 13.171 | 1.00  | 45.30 |     | C |
| ANISOU | 616 | C   | LEU | A | 131 | 4644    | 6487   | 6081   | -700  | 178   | 5   | C |
| ATOM   | 617 | O   | LEU | A | 131 | -20.037 | 6.384  | 13.252 | 1.00  | 45.44 |     | O |
| ANISOU | 617 | O   | LEU | A | 131 | 4542    | 6593   | 6130   | -670  | 196   | -27 | O |
| ATOM   | 618 | N   | SER | A | 132 | -18.766 | 4.643  | 13.909 | 1.00  | 45.70 |     | N |
| ANISOU | 618 | N   | SER | A | 132 | 4741    | 6519   | 6103   | -811  | 201   | 35  | N |
| ATOM   | 619 | CA  | SER | A | 132 | -19.675 | 4.182  | 14.954 | 1.00  | 44.41 |     | C |
| ANISOU | 619 | CA  | SER | A | 132 | 4493    | 6437   | 5944   | -915  | 260   | 37  | C |
| ATOM   | 620 | CB  | SER | A | 132 | -20.087 | 2.731  | 14.693 | 1.00  | 44.17 |     | C |
| ANISOU | 620 | CB  | SER | A | 132 | 4481    | 6393   | 5909   | -1047 | 210   | 62  | C |
| ATOM   | 621 | OG  | SER | A | 132 | -20.690 | 2.149  | 15.835 | 1.00  | 44.58 |     | O |
| ANISOU | 621 | OG  | SER | A | 132 | 4487    | 6504   | 5948   | -1166 | 275   | 74  | O |
| ATOM   | 622 | C   | SER | A | 132 | -18.996 | 4.288  | 16.317 | 1.00  | 43.05 |     | C |
| ANISOU | 622 | C   | SER | A | 132 | 4376    | 6249   | 5731   | -932  | 347   | 51  | C |
| ATOM   | 623 | O   | SER | A | 132 | -18.035 | 3.567  | 16.589 | 1.00  | 35.37 |     | O |
| ANISOU | 623 | O   | SER | A | 132 | 3526    | 5196   | 4716   | -972  | 342   | 76  | O |
| ATOM   | 624 | N   | PRO | A | 133 | -19.489 | 5.194  | 17.175 | 1.00  | 43.66 |     | N |
| ANISOU | 624 | N   | PRO | A | 133 | 4368    | 6404   | 5818   | -894  | 423   | 31  | N |
| ATOM   | 625 | CA  | PRO | A | 133 | -18.922 | 5.396  | 18.513 | 1.00  | 44.35 |     | C |
| ANISOU | 625 | CA  | PRO | A | 133 | 4503    | 6479   | 5868   | -899  | 506   | 42  | C |
| ATOM   | 626 | CB  | PRO | A | 133 | -19.916 | 6.361  | 19.167 | 1.00  | 47.59 |     | C |
| ANISOU | 626 | CB  | PRO | A | 133 | 4782    | 7003   | 6298   | -853  | 570   | 15  | C |
| ATOM   | 627 | CG  | PRO | A | 133 | -20.506 | 7.113  | 18.018 | 1.00  | 44.89 |     | C |
| ANISOU | 627 | CG  | PRO | A | 133 | 4362    | 6700   | 5995   | -764  | 511   | -17 | C |
| ATOM   | 628 | CD  | PRO | A | 133 | -20.615 | 6.106  | 16.909 | 1.00  | 42.95 |     | C |
| ANISOU | 628 | CD  | PRO | A | 133 | 4135    | 6417   | 5767   | -830  | 428   | -6  | C |
| ATOM   | 629 | C   | PRO | A | 133 | -18.836 | 4.095  | 19.310 | 1.00  | 44.32 |     | C |
| ANISOU | 629 | C   | PRO | A | 133 | 4556    | 6453   | 5830   | -1036 | 533   | 71  | C |
| ATOM   | 630 | O   | PRO | A | 133 | -17.938 | 3.937  | 20.136 | 1.00  | 41.38 |     | O |
| ANISOU | 630 | O   | PRO | A | 133 | 4284    | 6020   | 5417   | -1043 | 572   | 84  | O |
| ATOM   | 631 | N   | GLU | A | 134 | -19.762 | 3.176  | 19.056 | 1.00  | 45.37 |     | N |
| ANISOU | 631 | N   | GLU | A | 134 | 4630    | 6631   | 5977   | -1145 | 508   | 79  | N |
| ATOM   | 632 | CA  | GLU | A | 134 | -19.765 | 1.879  | 19.721 | 1.00  | 46.27 |     | C |
| ANISOU | 632 | CA  | GLU | A | 134 | 4808    | 6720   | 6052   | -1287 | 523   | 108 | C |
| ATOM   | 633 | CB  | GLU | A | 134 | -21.065 | 1.132  | 19.418 | 1.00  | 60.79 |     | C |
| ANISOU | 633 | CB  | GLU | A | 134 | 6542    | 8637   | 7916   | -1406 | 500   | 112 | C |
| ATOM   | 634 | CG  | GLU | A | 134 | -21.076 | -0.313 | 19.886 | 1.00  | 74.48 |     | C |
| ANISOU | 634 | CG  | GLU | A | 134 | 8363    | 10332  | 9605   | -1566 | 493   | 146 | C |
| ATOM   | 635 | CD  | GLU | A | 134 | -22.272 | -1.085 | 19.360 | 1.00  | 87.31 |     | C |
| ANISOU | 635 | CD  | GLU | A | 134 | 9896    | 12021  | 11256  | -1687 | 447   | 154 | C |
| ATOM   | 636 | OE1 | GLU | A | 134 | -23.191 | -0.450 | 18.799 | 1.00  | 90.07 |     | O |
| ANISOU | 636 | OE1 | GLU | A | 134 | 10095   | 12466  | 11662  | -1647 | 437   | 129 | O |
| ATOM   | 637 | OE2 | GLU | A | 134 | -22.291 | -2.326 | 19.506 | 1.00  | 91.50 |     | O |
| ANISOU | 637 | OE2 | GLU | A | 134 | 10511   | 12506  | 11747  | -1823 | 417   | 183 | O |
| ATOM   | 638 | C   | GLU | A | 134 | -18.568 | 1.033  | 19.297 | 1.00  | 39.27 |     | C |
| ANISOU | 638 | C   | GLU | A | 134 | 4093    | 5706   | 5121   | -1301 | 458   | 128 | C |
| ATOM   | 639 | O   | GLU | A | 134 | -17.899 | 0.423  | 20.132 | 1.00  | 34.71 |     | O |
| ANISOU | 639 | O   | GLU | A | 134 | 3626    | 5071   | 4492   | -1351 | 487   | 143 | O |
| ATOM   | 640 | N   | ALA | A | 135 | -18.302 | 0.997  | 17.996 | 1.00  | 40.36 |     | N |
| ANISOU | 640 | N   | ALA | A | 135 | 4257    | 5802   | 5277   | -1249 | 368   | 126 | N |
| ATOM   | 641 | CA  | ALA | A | 135 | -17.178 | 0.233  | 17.466 | 1.00  | 39.38 |     | C |
| ANISOU | 641 | CA  | ALA | A | 135 | 4288    | 5567   | 5106   | -1244 | 299   | 143 | C |
| ATOM   | 642 | CB  | ALA | A | 135 | -17.233 | 0.194  | 15.947 | 1.00  | 42.41 |     | C |
| ANISOU | 642 | CB  | ALA | A | 135 | 4669    | 5928   | 5517   | -1193 | 200   | 141 | C |
| ATOM   | 643 | C   | ALA | A | 135 | -15.852 | 0.819  | 17.936 | 1.00  | 34.01 |     | C |
| ANISOU | 643 | C   | ALA | A | 135 | 3700    | 4828   | 4393   | -1153 | 334   | 139 | C |
| ATOM   | 644 | O   | ALA | A | 135 | -14.919 | 0.086  | 18.265 | 1.00  | 28.63 |     | O |
| ANISOU | 644 | O   | ALA | A | 135 | 3151    | 4073   | 3654   | -1177 | 321   | 151 | O |
| ATOM   | 645 | N   | VAL | A | 136 | -15.773 | 2.146  | 17.961 | 1.00  | 30.67 |     | N |
| ANISOU | 645 | N   | VAL | A | 136 | 3212    | 4439   | 4003   | -1049 | 373   | 119 | N |

|        |     |     |     |   |     |         |        |        |       |       |     |   |
|--------|-----|-----|-----|---|-----|---------|--------|--------|-------|-------|-----|---|
| ATOM   | 646 | CA  | VAL | A | 136 | -14.567 | 2.824  | 18.411 | 1.00  | 27.97 |     | C |
| ANISOU | 646 | CA  | VAL | A | 136 | 2945    | 4047   | 3634   | -966  | 406   | 115 | C |
| ATOM   | 647 | CB  | VAL | A | 136 | -14.664 | 4.352  | 18.225 | 1.00  | 28.24 |     | C |
| ANISOU | 647 | CB  | VAL | A | 136 | 2902    | 4121   | 3708   | -852  | 432   | 95  | C |
| ATOM   | 648 | CG1 | VAL | A | 136 | -13.392 | 5.026  | 18.712 | 1.00  | 29.77 |     | C |
| ANISOU | 648 | CG1 | VAL | A | 136 | 3178    | 4260   | 3872   | -780  | 461   | 94  | C |
| ATOM   | 649 | CG2 | VAL | A | 136 | -14.926 | 4.694  | 16.765 | 1.00  | 30.76 |     | C |
| ANISOU | 649 | CG2 | VAL | A | 136 | 3183    | 4444   | 4061   | -794  | 358   | 87  | C |
| ATOM   | 650 | C   | VAL | A | 136 | -14.311 | 2.492  | 19.877 | 1.00  | 30.59 |     | C |
| ANISOU | 650 | C   | VAL | A | 136 | 3325    | 4369   | 3927   | -1021 | 480   | 120 | C |
| ATOM   | 651 | O   | VAL | A | 136 | -13.169 | 2.283  | 20.283 | 1.00  | 28.86 |     | O |
| ANISOU | 651 | O   | VAL | A | 136 | 3221    | 4082   | 3664   | -1001 | 484   | 123 | O |
| ATOM   | 652 | N   | ARG | A | 137 | -15.380 | 2.428  | 20.669 | 1.00  | 30.48 |     | N |
| ANISOU | 652 | N   | ARG | A | 137 | 3225    | 4426   | 3928   | -1089 | 540   | 120 | N |
| ATOM   | 653 | CA  | ARG | A | 137 | -15.243 | 2.053  | 22.072 | 1.00  | 31.01 |     | C |
| ANISOU | 653 | CA  | ARG | A | 137 | 3352    | 4481   | 3950   | -1137 | 604   | 121 | C |
| ATOM   | 654 | CB  | ARG | A | 137 | -16.589 | 2.058  | 22.799 | 1.00  | 35.85 |     | C |
| ANISOU | 654 | CB  | ARG | A | 137 | 3846    | 5192   | 4582   | -1208 | 669   | 120 | C |
| ATOM   | 655 | CG  | ARG | A | 137 | -16.506 | 1.389  | 24.165 | 1.00  | 43.27 |     | C |
| ANISOU | 655 | CG  | ARG | A | 137 | 4864    | 6111   | 5468   | -1281 | 727   | 125 | C |
| ATOM   | 656 | CD  | ARG | A | 137 | -17.615 | 1.815  | 25.112 | 1.00  | 50.55 |     | C |
| ANISOU | 656 | CD  | ARG | A | 137 | 5668    | 7135   | 6405   | -1309 | 814   | 121 | C |
| ATOM   | 657 | NE  | ARG | A | 137 | -17.242 | 1.533  | 26.496 | 1.00  | 53.22 |     | N |
| ANISOU | 657 | NE  | ARG | A | 137 | 6097    | 7434   | 6690   | -1333 | 876   | 120 | N |
| ATOM   | 658 | CZ  | ARG | A | 137 | -17.854 | 2.040  | 27.560 | 1.00  | 55.95 |     | C |
| ANISOU | 658 | CZ  | ARG | A | 137 | 6378    | 7846   | 7036   | -1326 | 961   | 115 | C |
| ATOM   | 659 | NH1 | ARG | A | 137 | -18.885 | 2.859  | 27.409 | 1.00  | 61.32 |     | N |
| ANISOU | 659 | NH1 | ARG | A | 137 | 6895    | 8643   | 7760   | -1293 | 994   | 109 | N |
| ATOM   | 660 | NH2 | ARG | A | 137 | -17.434 | 1.726  | 28.778 | 1.00  | 49.77 |     | N |
| ANISOU | 660 | NH2 | ARG | A | 137 | 5693    | 7013   | 6203   | -1346 | 1011  | 115 | N |
| ATOM   | 661 | C   | ARG | A | 137 | -14.576 | 0.691  | 22.226 | 1.00  | 30.88 |     | C |
| ANISOU | 661 | C   | ARG | A | 137 | 3480    | 4382   | 3871   | -1217 | 567   | 135 | C |
| ATOM   | 662 | O   | ARG | A | 137 | -13.700 | 0.510  | 23.069 | 1.00  | 29.95 |     | O |
| ANISOU | 662 | O   | ARG | A | 137 | 3472    | 4204   | 3702   | -1198 | 588   | 127 | O |
| ATOM   | 663 | N   | CYS | A | 138 | -14.991 | -0.267 | 21.407 | 1.00  | 34.25 |     | N |
| ANISOU | 663 | N   | CYS | A | 138 | 3910    | 4803   | 4300   | -1303 | 504   | 153 | N |
| ATOM   | 664 | CA  | CYS | A | 138 | -14.429 | -1.609 | 21.470 | 1.00  | 37.51 |     | C |
| ANISOU | 664 | CA  | CYS | A | 138 | 4472    | 5135   | 4646   | -1379 | 455   | 167 | C |
| ATOM   | 665 | CB  | CYS | A | 138 | -15.194 | -2.551 | 20.537 | 1.00  | 43.36 |     | C |
| ANISOU | 665 | CB  | CYS | A | 138 | 5201    | 5883   | 5392   | -1467 | 374   | 184 | C |
| ATOM   | 666 | SG  | CYS | A | 138 | -16.934 | -2.773 | 20.998 | 1.00  | 55.20 |     | S |
| ANISOU | 666 | SG  | CYS | A | 138 | 6553    | 7490   | 6931   | -1604 | 425   | 195 | S |
| ATOM   | 667 | C   | CYS | A | 138 | -12.935 | -1.605 | 21.145 | 1.00  | 33.09 |     | C |
| ANISOU | 667 | C   | CYS | A | 138 | 4040    | 4489   | 4044   | -1286 | 411   | 159 | C |
| ATOM   | 668 | O   | CYS | A | 138 | -12.146 | -2.314 | 21.769 | 1.00  | 29.30 |     | O |
| ANISOU | 668 | O   | CYS | A | 138 | 3695    | 3943   | 3495   | -1307 | 408   | 157 | O |
| ATOM   | 669 | N   | THR | A | 139 | -12.546 | -0.794 | 20.170 | 1.00  | 26.27 |     | N |
| ANISOU | 669 | N   | THR | A | 139 | 3136    | 3630   | 3215   | -1181 | 376   | 152 | N |
| ATOM   | 670 | CA  | THR | A | 139 | -11.139 | -0.662 | 19.826 | 1.00  | 23.89 |     | C |
| ANISOU | 670 | CA  | THR | A | 139 | 2935    | 3265   | 2876   | -1090 | 340   | 145 | C |
| ATOM   | 671 | CB  | THR | A | 139 | -10.954 | 0.266  | 18.613 | 1.00  | 24.60 |     | C |
| ANISOU | 671 | CB  | THR | A | 139 | 2962    | 3373   | 3012   | -988  | 303   | 142 | C |
| ATOM   | 672 | OG1 | THR | A | 139 | -11.734 | -0.229 | 17.518 | 1.00  | 26.99 |     | O |
| ANISOU | 672 | OG1 | THR | A | 139 | 3227    | 3689   | 3337   | -1020 | 233   | 152 | O |
| ATOM   | 673 | CG2 | THR | A | 139 | -9.486  | 0.338  | 18.209 | 1.00  | 19.26 |     | C |
| ANISOU | 673 | CG2 | THR | A | 139 | 2383    | 2641   | 2292   | -903  | 267   | 137 | C |
| ATOM   | 674 | C   | THR | A | 139 | -10.367 | -0.102 | 21.014 | 1.00  | 25.03 |     | C |
| ANISOU | 674 | C   | THR | A | 139 | 3120    | 3392   | 2997   | -1043 | 410   | 127 | C |
| ATOM   | 675 | O   | THR | A | 139 | -9.305  | -0.605 | 21.382 | 1.00  | 26.08 |     | O |
| ANISOU | 675 | O   | THR | A | 139 | 3375    | 3465   | 3068   | -1025 | 394   | 117 | O |
| ATOM   | 676 | N   | ILE | A | 140 | -10.918 | 0.936  | 21.623 | 1.00  | 22.01 |     | N |
| ANISOU | 676 | N   | ILE | A | 140 | 2643    | 3063   | 2657   | -1009 | 475   | 115 | N |
| ATOM   | 677 | CA  | ILE | A | 140 | -10.266 | 1.561  | 22.758 | 1.00  | 23.74 |     | C |
| ANISOU | 677 | CA  | ILE | A | 140 | 2902    | 3261   | 2858   | -951  | 528   | 92  | C |
| ATOM   | 678 | CB  | ILE | A | 140 | -10.969 | 2.872  | 23.139 | 1.00  | 25.05 |     | C |
| ANISOU | 678 | CB  | ILE | A | 140 | 2951    | 3488   | 3078   | -900  | 585   | 85  | C |
| ATOM   | 679 | CG1 | ILE | A | 140 | -10.844 | 3.878  | 21.988 | 1.00  | 25.41 |     | C |
| ANISOU | 679 | CG1 | ILE | A | 140 | 2932    | 3553   | 3168   | -817  | 552   | 87  | C |
| ATOM   | 680 | CD1 | ILE | A | 140 | -11.768 | 5.058  | 22.111 | 1.00  | 29.64 |     | C |
| ANISOU | 680 | CD1 | ILE | A | 140 | 3348    | 4158   | 3755   | -776  | 595   | 82  | C |

|        |     |     |     |   |     |         |        |        |       |       |     |   |
|--------|-----|-----|-----|---|-----|---------|--------|--------|-------|-------|-----|---|
| ATOM   | 681 | CG2 | ILE | A | 140 | -10.382 | 3.446  | 24.419 | 1.00  | 24.43 |     | C |
| ANISOU | 681 | CG2 | ILE | A | 140 | 2922    | 3380   | 2982   | -849  | 636   | 64  | C |
| ATOM   | 682 | C   | ILE | A | 140 | -10.197 | 0.591  | 23.943 | 1.00  | 28.69 |     | C |
| ANISOU | 682 | C   | ILE | A | 140 | 3622    | 3852   | 3427   | -1025 | 556   | 85  | C |
| ATOM   | 683 | O   | ILE | A | 140 | -9.167  | 0.484  | 24.615 | 1.00  | 25.26 |     | O |
| ANISOU | 683 | O   | ILE | A | 140 | 3289    | 3361   | 2949   | -987  | 560   | 65  | O |
| ATOM   | 684 | N   | GLU | A | 141 | -11.285 | -0.132 | 24.181 | 1.00  | 27.08 |     | N |
| ANISOU | 684 | N   | GLU | A | 141 | 3386    | 3682   | 3223   | -1134 | 574   | 101 | N |
| ATOM   | 685 | CA  | GLU | A | 141 | -11.305 | -1.121 | 25.259 | 1.00  | 33.48 |     | C |
| ANISOU | 685 | CA  | GLU | A | 141 | 4294    | 4455   | 3972   | -1220 | 601   | 98  | C |
| ATOM   | 686 | CB  | GLU | A | 141 | -12.686 | -1.768 | 25.390 | 1.00  | 36.14 |     | C |
| ANISOU | 686 | CB  | GLU | A | 141 | 4565    | 4847   | 4319   | -1351 | 624   | 121 | C |
| ATOM   | 687 | CG  | GLU | A | 141 | -13.729 | -0.842 | 25.997 | 1.00  | 40.45 |     | C |
| ANISOU | 687 | CG  | GLU | A | 141 | 4966    | 5485   | 4918   | -1346 | 706   | 119 | C |
| ATOM   | 688 | CD  | GLU | A | 141 | -15.064 | -1.521 | 26.230 | 1.00  | 52.37 |     | C |
| ANISOU | 688 | CD  | GLU | A | 141 | 6405    | 7061   | 6432   | -1485 | 736   | 141 | C |
| ATOM   | 689 | OE1 | GLU | A | 141 | -15.176 | -2.738 | 25.965 | 1.00  | 57.78 |     | O |
| ANISOU | 689 | OE1 | GLU | A | 141 | 7166    | 7711   | 7077   | -1595 | 690   | 159 | O |
| ATOM   | 690 | OE2 | GLU | A | 141 | -16.004 | -0.832 | 26.678 | 1.00  | 54.33 |     | O |
| ANISOU | 690 | OE2 | GLU | A | 141 | 6522    | 7401   | 6719   | -1485 | 803   | 140 | O |
| ATOM   | 691 | C   | GLU | A | 141 | -10.227 | -2.179 | 25.057 | 1.00  | 36.25 |     | C |
| ANISOU | 691 | C   | GLU | A | 141 | 4806    | 4718   | 4248   | -1231 | 537   | 94  | C |
| ATOM   | 692 | O   | GLU | A | 141 | -9.650  | -2.682 | 26.021 | 1.00  | 40.65 |     | O |
| ANISOU | 692 | O   | GLU | A | 141 | 5479    | 5220   | 4745   | -1243 | 555   | 76  | O |
| ATOM   | 693 | N   | ALA | A | 142 | -9.943  | -2.499 | 23.798 | 1.00  | 35.44 |     | N |
| ANISOU | 693 | N   | ALA | A | 142 | 4716    | 4602   | 4146   | -1219 | 460   | 109 | N |
| ATOM   | 694 | CA  | ALA | A | 142 | -8.898  | -3.462 | 23.477 | 1.00  | 31.93 |     | C |
| ANISOU | 694 | CA  | ALA | A | 142 | 4424    | 4080   | 3627   | -1215 | 390   | 107 | C |
| ATOM   | 695 | CB  | ALA | A | 142 | -9.097  | -4.016 | 22.074 | 1.00  | 34.21 |     | C |
| ANISOU | 695 | CB  | ALA | A | 142 | 4713    | 4364   | 3922   | -1234 | 301   | 131 | C |
| ATOM   | 696 | C   | ALA | A | 142 | -7.493  | -2.874 | 23.636 | 1.00  | 33.27 |     | C |
| ANISOU | 696 | C   | ALA | A | 142 | 4648    | 4218   | 3776   | -1094 | 389   | 78  | C |
| ATOM   | 697 | O   | ALA | A | 142 | -6.500  | -3.571 | 23.432 | 1.00  | 35.13 |     | O |
| ANISOU | 697 | O   | ALA | A | 142 | 5007    | 4397   | 3944   | -1071 | 336   | 70  | O |
| ATOM   | 698 | N   | GLY | A | 143 | -7.416  | -1.593 | 23.991 | 1.00  | 27.19 |     | N |
| ANISOU | 698 | N   | GLY | A | 143 | 3787    | 3484   | 3060   | -1017 | 443   | 61  | N |
| ATOM   | 699 | CA  | GLY | A | 143 | -6.145  | -0.953 | 24.276 | 1.00  | 29.75 |     | C |
| ANISOU | 699 | CA  | GLY | A | 143 | 4152    | 3781   | 3373   | -914  | 445   | 32  | C |
| ATOM   | 700 | C   | GLY | A | 143 | -5.489  | -0.169 | 23.148 | 1.00  | 28.88 |     | C |
| ANISOU | 700 | C   | GLY | A | 143 | 3992    | 3689   | 3293   | -826  | 407   | 37  | C |
| ATOM   | 701 | O   | GLY | A | 143 | -4.327  | 0.223  | 23.274 | 1.00  | 25.25 |     | O |
| ANISOU | 701 | O   | GLY | A | 143 | 3571    | 3205   | 2816   | -751  | 398   | 14  | O |
| ATOM   | 702 | N   | TYR | A | 144 | -6.223  | 0.078  | 22.061 | 1.00  | 24.88 |     | N |
| ANISOU | 702 | N   | TYR | A | 144 | 3648    | 2477   | 3326   | -607  | -15   | 388 | N |
| ATOM   | 703 | CA  | TYR | A | 144 | -5.659  | 0.722  | 20.869 | 1.00  | 24.95 |     | C |
| ANISOU | 703 | CA  | TYR | A | 144 | 3601    | 2522   | 3357   | -530  | -3    | 281 | C |
| ATOM   | 704 | C   | TYR | A | 144 | -6.365  | 2.019  | 20.474 | 1.00  | 27.21 |     | C |
| ANISOU | 704 | C   | TYR | A | 144 | 3792    | 2925   | 3620   | -534  | 98    | 279 | C |
| ATOM   | 705 | CB  | TYR | A | 144 | -5.717  | -0.229 | 19.665 | 1.00  | 22.60 |     | C |
| ANISOU | 705 | CB  | TYR | A | 144 | 3317    | 2153   | 3118   | -533  | -85   | 226 | C |
| ATOM   | 706 | CG  | TYR | A | 144 | -5.025  | -1.554 | 19.884 | 1.00  | 27.70 |     | C |
| ANISOU | 706 | CG  | TYR | A | 144 | 4064    | 2662   | 3799   | -510  | -205  | 210 | C |
| ATOM   | 707 | CD1 | TYR | A | 144 | -3.671  | -1.612 | 20.176 | 1.00  | 30.75 |     | C |
| ANISOU | 707 | CD1 | TYR | A | 144 | 4481    | 3022   | 4181   | -409  | -241  | 154 | C |
| ATOM   | 708 | CD2 | TYR | A | 144 | -5.729  | -2.746 | 19.810 | 1.00  | 34.05 |     | C |
| ANISOU | 708 | CD2 | TYR | A | 144 | 4933    | 3360   | 4644   | -590  | -293  | 257 | C |
| ATOM   | 709 | CE1 | TYR | A | 144 | -3.034  | -2.824 | 20.382 | 1.00  | 32.86 |     | C |
| ANISOU | 709 | CE1 | TYR | A | 144 | 4841    | 3157   | 4488   | -372  | -359  | 136 | C |
| ATOM   | 710 | CE2 | TYR | A | 144 | -5.101  | -3.965 | 20.018 | 1.00  | 38.42 |     | C |
| ANISOU | 710 | CE2 | TYR | A | 144 | 5594    | 3767   | 5236   | -563  | -420  | 241 | C |
| ATOM   | 711 | CZ  | TYR | A | 144 | -3.752  | -3.995 | 20.301 | 1.00  | 34.98 |     | C |
| ANISOU | 711 | CZ  | TYR | A | 144 | 5186    | 3305   | 4799   | -445  | -451  | 176 | C |
| ATOM   | 712 | OH  | TYR | A | 144 | -3.119  | -5.202 | 20.507 | 1.00  | 33.87 |     | O |
| ANISOU | 712 | OH  | TYR | A | 144 | 5152    | 3014   | 4704   | -402  | -585  | 157 | O |
| ATOM   | 713 | O   | TYR | A | 144 | -7.521  | 1.991  | 20.061 | 1.00  | 32.77 |     | O |
| ANISOU | 713 | O   | TYR | A | 144 | 4448    | 3661   | 4341   | -598  | 126   | 320 | O |
| ATOM   | 714 | N   | PRO | A | 145 | -5.682  | 3.167  | 20.621 | 1.00  | 21.12 |     | N |
| ANISOU | 714 | N   | PRO | A | 145 | 2997    | 2213   | 2814   | -469  | 144   | 239 | N |
| ATOM   | 715 | CA  | PRO | A | 145 | -4.440  | 3.311  | 21.379 | 1.00  | 17.75 |     | C |
| ANISOU | 715 | CA  | PRO | A | 145 | 2622    | 1763   | 2359   | -412  | 115   | 219 | C |

|        |     |     |     |   |     |        |        |        |      |       |     |   |
|--------|-----|-----|-----|---|-----|--------|--------|--------|------|-------|-----|---|
| ATOM   | 716 | C   | PRO | A | 145 | -4.810 | 3.521  | 22.837 | 1.00 | 18.89 | C   |   |
| ANISOU | 716 | C   | PRO | A | 145 | 2815   | 1919   | 2444   | -440 | 155   | 293 | C |
| ATOM   | 717 | CB  | PRO | A | 145 | -3.853 | 4.606  | 20.827 | 1.00 | 20.59 | C   |   |
| ANISOU | 717 | CB  | PRO | A | 145 | 2923   | 2194   | 2704   | -359 | 147   | 163 | C |
| ATOM   | 718 | CG  | PRO | A | 145 | -5.050 | 5.419  | 20.434 | 1.00 | 18.51 | C   |   |
| ANISOU | 718 | CG  | PRO | A | 145 | 2598   | 1996   | 2438   | -391 | 220   | 184 | C |
| ATOM   | 719 | CD  | PRO | A | 145 | -6.124 | 4.444  | 20.029 | 1.00 | 17.53 | C   |   |
| ANISOU | 719 | CD  | PRO | A | 145 | 2461   | 1848   | 2350   | -455 | 213   | 220 | C |
| ATOM   | 720 | O   | PRO | A | 145 | -6.000 | 3.555  | 23.151 | 1.00 | 22.05 | O   |   |
| ANISOU | 720 | O   | PRO | A | 145 | 3194   | 2358   | 2826   | -496 | 212   | 354 | O |
| ATOM   | 721 | N   | GLY | A | 146 | -3.813 | 3.678  | 23.698 | 1.00 | 16.68 | N   |   |
| ANISOU | 721 | N   | GLY | A | 146 | 2592   | 1618   | 2128   | -403 | 126   | 289 | N |
| ATOM   | 722 | CA  | GLY | A | 146 | -4.047 | 3.962  | 25.100 | 1.00 | 13.21 | C   |   |
| ANISOU | 722 | CA  | GLY | A | 146 | 2209   | 1197   | 1611   | -423 | 161   | 349 | C |
| ATOM   | 723 | C   | GLY | A | 146 | -3.868 | 5.434  | 25.438 | 1.00 | 17.21 | C   |   |
| ANISOU | 723 | C   | GLY | A | 146 | 2709   | 1769   | 2062   | -379 | 217   | 317 | C |
| ATOM   | 724 | O   | GLY | A | 146 | -3.356 | 6.217  | 24.637 | 1.00 | 18.76 | O   |   |
| ANISOU | 724 | O   | GLY | A | 146 | 2859   | 1984   | 2284   | -339 | 210   | 257 | O |
| ATOM   | 725 | N   | VAL | A | 147 | -4.299 | 5.809  | 26.634 | 1.00 | 16.03 | N   |   |
| ANISOU | 725 | N   | VAL | A | 147 | 2610   | 1653   | 1829   | -388 | 266   | 357 | N |
| ATOM   | 726 | CA  | VAL | A | 147 | -4.164 | 7.183  | 27.107 | 1.00 | 14.76 | C   |   |
| ANISOU | 726 | CA  | VAL | A | 147 | 2470   | 1535   | 1603   | -340 | 305   | 321 | C |
| ATOM   | 727 | CB  | VAL | A | 147 | -5.487 | 7.964  | 26.947 | 1.00 | 22.47 | C   |   |
| ANISOU | 727 | CB  | VAL | A | 147 | 3390   | 2590   | 2559   | -327 | 408   | 320 | C |
| ATOM   | 728 | CG1 | VAL | A | 147 | -5.308 | 9.421  | 27.383 | 1.00 | 26.75 | C   |   |
| ANISOU | 728 | CG1 | VAL | A | 147 | 3972   | 3152   | 3041   | -261 | 430   | 266 | C |
| ATOM   | 729 | CG2 | VAL | A | 147 | -5.996 | 7.881  | 25.516 | 1.00 | 28.12 | C   |   |
| ANISOU | 729 | CG2 | VAL | A | 147 | 4003   | 3315   | 3367   | -340 | 415   | 304 | C |
| ATOM   | 730 | C   | VAL | A | 147 | -3.807 | 7.161  | 28.586 | 1.00 | 19.24 | C   |   |
| ANISOU | 730 | C   | VAL | A | 147 | 3141   | 2095   | 2072   | -342 | 295   | 353 | C |
| ATOM   | 731 | O   | VAL | A | 147 | -4.454 | 6.455  | 29.359 | 1.00 | 23.54 | O   |   |
| ANISOU | 731 | O   | VAL | A | 147 | 3715   | 2661   | 2569   | -386 | 326   | 421 | O |
| ATOM   | 732 | N   | LEU | A | 148 | -2.785 | 7.915  | 28.984 | 1.00 | 18.54 | N   |   |
| ANISOU | 732 | N   | LEU | A | 148 | 3111   | 1984   | 1951   | -306 | 244   | 314 | N |
| ATOM   | 733 | CA  | LEU | A | 148 | -2.414 | 8.002  | 30.401 | 1.00 | 18.62 | C   |   |
| ANISOU | 733 | CA  | LEU | A | 148 | 3231   | 1988   | 1855   | -308 | 225   | 339 | C |
| ATOM   | 734 | CB  | LEU | A | 148 | -0.968 | 8.480  | 30.575 | 1.00 | 20.12 | C   |   |
| ANISOU | 734 | CB  | LEU | A | 148 | 3471   | 2127   | 2045   | -288 | 122   | 307 | C |
| ATOM   | 735 | CG  | LEU | A | 148 | 0.189  | 7.593  | 30.107 | 1.00 | 25.54 | C   |   |
| ANISOU | 735 | CG  | LEU | A | 148 | 4129   | 2758   | 2815   | -298 | 21    | 321 | C |
| ATOM   | 736 | CD1 | LEU | A | 148 | 1.523  | 8.214  | 30.531 | 1.00 | 24.27 | C   |   |
| ANISOU | 736 | CD1 | LEU | A | 148 | 4016   | 2574   | 2633   | -285 | -74   | 306 | C |
| ATOM   | 737 | CD2 | LEU | A | 148 | 0.044  | 6.170  | 30.645 | 1.00 | 25.39 | C   |   |
| ANISOU | 737 | CD2 | LEU | A | 148 | 4146   | 2703   | 2799   | -337 | -5    | 388 | C |
| ATOM   | 738 | C   | LEU | A | 148 | -3.340 | 8.947  | 31.160 | 1.00 | 22.45 | C   |   |
| ANISOU | 738 | C   | LEU | A | 148 | 3754   | 2542   | 2234   | -276 | 319   | 323 | C |
| ATOM   | 739 | O   | LEU | A | 148 | -3.789 | 9.959  | 30.622 | 1.00 | 20.38 | O   |   |
| ANISOU | 739 | O   | LEU | A | 148 | 3453   | 2306   | 1985   | -229 | 364   | 269 | O |
| ATOM   | 740 | N   | SER | A | 149 | -3.615 | 8.624  | 32.420 | 1.00 | 22.66 | N   |   |
| ANISOU | 740 | N   | SER | A | 149 | 3860   | 2601   | 2150   | -295 | 347   | 369 | N |
| ATOM   | 741 | CA  | SER | A | 149 | -4.456 | 9.492  | 33.237 | 1.00 | 25.98 | C   |   |
| ANISOU | 741 | CA  | SER | A | 149 | 4321   | 3102   | 2447   | -247 | 442   | 344 | C |
| ATOM   | 742 | CB  | SER | A | 149 | -4.946 | 8.747  | 34.479 | 1.00 | 31.63 | C   |   |
| ANISOU | 742 | CB  | SER | A | 149 | 5092   | 3884   | 3042   | -292 | 489   | 423 | C |
| ATOM   | 743 | OG  | SER | A | 149 | -3.873 | 8.533  | 35.375 | 1.00 | 41.58 | O   |   |
| ANISOU | 743 | OG  | SER | A | 149 | 6471   | 5088   | 4240   | -316 | 395   | 439 | O |
| ATOM   | 744 | C   | SER | A | 149 | -3.719 | 10.769 | 33.644 | 1.00 | 26.47 | C   |   |
| ANISOU | 744 | C   | SER | A | 149 | 4481   | 3125   | 2451   | -184 | 393   | 261 | C |
| ATOM   | 745 | O   | SER | A | 149 | -4.344 | 11.807 | 33.858 | 1.00 | 29.92 | O   |   |
| ANISOU | 745 | O   | SER | A | 149 | 4941   | 3603   | 2826   | -112 | 457   | 201 | O |
| ATOM   | 746 | N   | SER | A | 150 | -2.394 | 10.695 | 33.750 | 1.00 | 24.47 | N   |   |
| ANISOU | 746 | N   | SER | A | 150 | 4286   | 2792   | 2221   | -209 | 272   | 260 | N |
| ATOM   | 747 | CA  | SER | A | 150 | -1.592 | 11.866 | 34.114 | 1.00 | 25.01 | C   |   |
| ANISOU | 747 | CA  | SER | A | 150 | 4450   | 2811   | 2242   | -172 | 197   | 196 | C |
| ATOM   | 748 | CB  | SER | A | 150 | -0.526 | 11.497 | 35.144 | 1.00 | 28.37 | C   |   |
| ANISOU | 748 | CB  | SER | A | 150 | 4986   | 3195   | 2598   | -212 | 96    | 230 | C |
| ATOM   | 749 | OG  | SER | A | 150 | -1.124 | 11.088 | 36.359 | 1.00 | 39.02 | O   |   |
| ANISOU | 749 | OG  | SER | A | 150 | 6414   | 4602   | 3810   | -220 | 157   | 265 | O |
| ATOM   | 750 | C   | SER | A | 150 | -0.918 | 12.506 | 32.909 | 1.00 | 22.94 | C   |   |
| ANISOU | 750 | C   | SER | A | 150 | 4122   | 2495   | 2098   | -167 | 127   | 158 | C |



|        |     |     |     |   |     |        |        |        |      |       |      |   |
|--------|-----|-----|-----|---|-----|--------|--------|--------|------|-------|------|---|
| ATOM   | 751 | O   | SER | A | 150 | -0.595 | 11.823 | 31.937 | 1.00 | 21.32 |      | O |
| ANISOU | 751 | O   | SER | A | 150 | 3814   | 2281   | 2005   | -199 | 103   | 186  | O |
| ATOM   | 752 | N   | ARG | A | 151 | -0.710 | 13.822 | 32.978 | 1.00 | 16.72 |      | N |
| ANISOU | 752 | N   | ARG | A | 151 | 3400   | 1675   | 1280   | -127 | 87    | 94   | N |
| ATOM   | 753 | CA  | ARG | A | 151 | 0.027  | 14.538 | 31.945 | 1.00 | 17.44 |      | C |
| ANISOU | 753 | CA  | ARG | A | 151 | 3440   | 1718   | 1467   | -140 | 2     | 74   | C |
| ATOM   | 754 | CB  | ARG | A | 151 | -0.303 | 16.042 | 31.993 | 1.00 | 20.22 |      | C |
| ANISOU | 754 | CB  | ARG | A | 151 | 3867   | 2034   | 1782   | -85  | -13   | 2    | C |
| ATOM   | 755 | CG  | ARG | A | 151 | -1.754 | 16.402 | 31.637 | 1.00 | 20.78 |      | C |
| ANISOU | 755 | CG  | ARG | A | 151 | 3890   | 2151   | 1855   | -12  | 111   | -37  | C |
| ATOM   | 756 | CD  | ARG | A | 151 | -2.072 | 17.902 | 31.865 | 1.00 | 19.77 |      | C |
| ANISOU | 756 | CD  | ARG | A | 151 | 3862   | 1969   | 1679   | 65   | 82    | -119 | C |
| ATOM   | 757 | NE  | ARG | A | 151 | -3.493 | 18.178 | 31.638 | 1.00 | 23.33 |      | N |
| ANISOU | 757 | NE  | ARG | A | 151 | 4259   | 2477   | 2127   | 153  | 206   | -155 | N |
| ATOM   | 758 | CZ  | ARG | A | 151 | -4.030 | 18.448 | 30.448 | 1.00 | 27.80 |      | C |
| ANISOU | 758 | CZ  | ARG | A | 151 | 4711   | 3052   | 2800   | 162  | 229   | -151 | C |
| ATOM   | 759 | NH1 | ARG | A | 151 | -3.268 | 18.505 | 29.359 | 1.00 | 21.66 |      | N |
| ANISOU | 759 | NH1 | ARG | A | 151 | 3865   | 2235   | 2130   | 88   | 143   | -116 | N |
| ATOM   | 760 | NH2 | ARG | A | 151 | -5.334 | 18.671 | 30.344 | 1.00 | 22.47 |      | N |
| ANISOU | 760 | NH2 | ARG | A | 151 | 3983   | 2436   | 2119   | 246  | 339   | -178 | N |
| ATOM   | 761 | C   | ARG | A | 151 | 1.521  | 14.330 | 32.190 | 1.00 | 20.91 |      | C |
| ANISOU | 761 | C   | ARG | A | 151 | 3912   | 2113   | 1920   | -197 | -131  | 109  | C |
| ATOM   | 762 | O   | ARG | A | 151 | 1.920  | 14.014 | 33.311 | 1.00 | 17.28 |      | O |
| ANISOU | 762 | O   | ARG | A | 151 | 3550   | 1639   | 1375   | -211 | -170  | 129  | O |
| ATOM   | 763 | N   | ASP | A | 152 | 2.343  | 14.506 | 31.152 | 1.00 | 20.75 |      | N |
| ANISOU | 763 | N   | ASP | A | 152 | 3800   | 2083   | 2000   | -230 | -202  | 123  | N |
| ATOM   | 764 | CA  | ASP | A | 152 | 3.798  | 14.474 | 31.320 | 1.00 | 20.00 |      | C |
| ANISOU | 764 | CA  | ASP | A | 152 | 3714   | 1963   | 1921   | -281 | -334  | 161  | C |
| ATOM   | 765 | CB  | ASP | A | 152 | 4.519  | 14.061 | 30.027 | 1.00 | 19.91 |      | C |
| ANISOU | 765 | CB  | ASP | A | 152 | 3545   | 1991   | 2028   | -307 | -363  | 192  | C |
| ATOM   | 766 | CG  | ASP | A | 152 | 4.282  | 15.022 | 28.868 | 1.00 | 19.51 |      | C |
| ANISOU | 766 | CG  | ASP | A | 152 | 3424   | 1956   | 2034   | -313 | -356  | 171  | C |
| ATOM   | 767 | OD1 | ASP | A | 152 | 3.979  | 16.216 | 29.104 | 1.00 | 18.09 |      | O |
| ANISOU | 767 | OD1 | ASP | A | 152 | 3328   | 1732   | 1814   | -310 | -383  | 140  | O |
| ATOM   | 768 | OD2 | ASP | A | 152 | 4.417  | 14.571 | 27.704 | 1.00 | 20.59 |      | O |
| ANISOU | 768 | OD2 | ASP | A | 152 | 3425   | 2147   | 2252   | -320 | -331  | 184  | O |
| ATOM   | 769 | C   | ASP | A | 152 | 4.313  | 15.816 | 31.833 | 1.00 | 19.93 |      | C |
| ANISOU | 769 | C   | ASP | A | 152 | 3820   | 1897   | 1856   | -298 | -438  | 137  | C |
| ATOM   | 770 | O   | ASP | A | 152 | 3.523  | 16.706 | 32.144 | 1.00 | 18.66 |      | O |
| ANISOU | 770 | O   | ASP | A | 152 | 3749   | 1706   | 1636   | -255 | -406  | 80   | O |
| ATOM   | 771 | N   | LYS | A | 153 | 5.633  | 15.965 | 31.923 | 1.00 | 18.21 |      | N |
| ANISOU | 771 | N   | LYS | A | 153 | 3600   | 1662   | 1656   | -357 | -571  | 181  | N |
| ATOM   | 772 | CA  | LYS | A | 153 | 6.207  | 17.157 | 32.547 | 1.00 | 24.56 |      | C |
| ANISOU | 772 | CA  | LYS | A | 153 | 4534   | 2399   | 2401   | -391 | -697  | 169  | C |
| ATOM   | 773 | CB  | LYS | A | 153 | 7.694  | 16.952 | 32.853 | 1.00 | 22.77 |      | C |
| ANISOU | 773 | CB  | LYS | A | 153 | 4291   | 2172   | 2188   | -465 | -841  | 240  | C |
| ATOM   | 774 | CG  | LYS | A | 153 | 8.583  | 16.853 | 31.624 | 1.00 | 23.55 |      | C |
| ANISOU | 774 | CG  | LYS | A | 153 | 4209   | 2335   | 2404   | -514 | -886  | 300  | C |
| ATOM   | 775 | CD  | LYS | A | 153 | 10.037 | 16.659 | 32.014 | 1.00 | 30.63 |      | C |
| ANISOU | 775 | CD  | LYS | A | 153 | 5078   | 3248   | 3311   | -580 | -1027 | 375  | C |
| ATOM   | 776 | CE  | LYS | A | 153 | 10.957 | 16.812 | 30.816 | 1.00 | 33.61 |      | C |
| ANISOU | 776 | CE  | LYS | A | 153 | 5273   | 3711   | 3788   | -631 | -1077 | 437  | C |
| ATOM   | 777 | NZ  | LYS | A | 153 | 12.385 | 16.723 | 31.223 | 1.00 | 31.00 |      | N |
| ANISOU | 777 | NZ  | LYS | A | 153 | 4902   | 3410   | 3467   | -697 | -1221 | 520  | N |
| ATOM   | 778 | C   | LYS | A | 153 | 5.985  | 18.403 | 31.689 | 1.00 | 23.93 |      | C |
| ANISOU | 778 | C   | LYS | A | 153 | 4440   | 2287   | 2363   | -400 | -728  | 143  | C |
| ATOM   | 779 | O   | LYS | A | 153 | 6.164  | 19.530 | 32.154 | 1.00 | 23.60 |      | O |
| ANISOU | 779 | O   | LYS | A | 153 | 4529   | 2166   | 2271   | -417 | -828  | 117  | O |
| ATOM   | 780 | N   | TYR | A | 154 | 5.585  | 18.194 | 30.440 | 1.00 | 21.89 |      | N |
| ANISOU | 780 | N   | TYR | A | 154 | 4035   | 2085   | 2197   | -392 | -652  | 151  | N |
| ATOM   | 781 | CA  | TYR | A | 154 | 5.280  | 19.304 | 29.544 | 1.00 | 21.04 |      | C |
| ANISOU | 781 | CA  | TYR | A | 154 | 3907   | 1954   | 2135   | -403 | -677  | 136  | C |
| ATOM   | 782 | CB  | TYR | A | 154 | 5.670  | 18.949 | 28.106 | 1.00 | 21.62 |      | C |
| ANISOU | 782 | CB  | TYR | A | 154 | 3789   | 2114   | 2314   | -447 | -661  | 190  | C |
| ATOM   | 783 | CG  | TYR | A | 154 | 7.140  | 18.638 | 27.907 | 1.00 | 22.88 |      | C |
| ANISOU | 783 | CG  | TYR | A | 154 | 3860   | 2327   | 2507   | -525 | -762  | 267  | C |
| ATOM   | 784 | CD1 | TYR | A | 154 | 8.066  | 19.656 | 27.696 | 1.00 | 27.84 |      | C |
| ANISOU | 784 | CD1 | TYR | A | 154 | 4491   | 2939   | 3147   | -616 | -906  | 321  | C |
| ATOM   | 785 | CE1 | TYR | A | 154 | 9.410  | 19.378 | 27.505 | 1.00 | 30.85 |      | C |
| ANISOU | 785 | CE1 | TYR | A | 154 | 4768   | 3394   | 3558   | -688 | -994  | 403  | C |

|        |     |     |     |   |     |        |        |        |      |       |     |   |
|--------|-----|-----|-----|---|-----|--------|--------|--------|------|-------|-----|---|
| ATOM   | 786 | CZ  | TYR | A | 154 | 9.846  | 18.067 | 27.522 | 1.00 | 33.61 |     | C |
| ANISOU | 786 | CZ  | TYR | A | 154 | 5017   | 3825   | 3930   | -651 | -938  | 418 | C |
| ATOM   | 787 | OH  | TYR | A | 154 | 11.183 | 17.787 | 27.328 | 1.00 | 31.88 |     | O |
| ANISOU | 787 | OH  | TYR | A | 154 | 4679   | 3692   | 3742   | -704 | -1022 | 496 | O |
| ATOM   | 788 | CE2 | TYR | A | 154 | 8.948  | 17.035 | 27.734 | 1.00 | 24.80 |     | C |
| ANISOU | 788 | CE2 | TYR | A | 154 | 3915   | 2703   | 2805   | -559 | -807  | 359 | C |
| ATOM   | 789 | CD2 | TYR | A | 154 | 7.604  | 17.323 | 27.920 | 1.00 | 23.09 |     | C |
| ANISOU | 789 | CD2 | TYR | A | 154 | 3794   | 2423   | 2556   | -507 | -719  | 291 | C |
| ATOM   | 790 | C   | TYR | A | 154 | 3.792  | 19.650 | 29.602 | 1.00 | 20.38 |     | C |
| ANISOU | 790 | C   | TYR | A | 154 | 3877   | 1844   | 2021   | -311 | -564  | 60  | C |
| ATOM   | 791 | O   | TYR | A | 154 | 3.319  | 20.534 | 28.885 | 1.00 | 22.73 |     | O |
| ANISOU | 791 | O   | TYR | A | 154 | 4164   | 2115   | 2360   | -302 | -574  | 41  | O |
| ATOM   | 792 | N   | GLY | A | 155 | 3.057  | 18.941 | 30.454 | 1.00 | 20.03 |     | N |
| ANISOU | 792 | N   | GLY | A | 155 | 3883   | 1819   | 1908   | -247 | -461  | 26  | N |
| ATOM   | 793 | CA  | GLY | A | 155 | 1.616  | 19.111 | 30.562 | 1.00 | 20.03 |     | C |
| ANISOU | 793 | CA  | GLY | A | 155 | 3907   | 1829   | 1875   | -154 | -336  | -36 | C |
| ATOM   | 794 | C   | GLY | A | 155 | 0.861  | 18.510 | 29.380 | 1.00 | 21.09 |     | C |
| ANISOU | 794 | C   | GLY | A | 155 | 3876   | 2035   | 2102   | -145 | -227  | -17 | C |
| ATOM   | 795 | O   | GLY | A | 155 | -0.301 | 18.842 | 29.141 | 1.00 | 17.48 |     | O |
| ANISOU | 795 | O   | GLY | A | 155 | 3404   | 1590   | 1647   | -79  | -141  | -56 | O |
| ATOM   | 796 | N   | ARG | A | 156 | 1.521  | 17.621 | 28.641 | 1.00 | 18.71 |     | N |
| ANISOU | 796 | N   | ARG | A | 156 | 3452   | 1784   | 1874   | -204 | -235  | 40  | N |
| ATOM   | 797 | CA  | ARG | A | 156 | 0.912  | 16.982 | 27.475 | 1.00 | 19.60 |     | C |
| ANISOU | 797 | CA  | ARG | A | 156 | 3418   | 1961   | 2069   | -203 | -149  | 55  | C |
| ATOM   | 798 | CB  | ARG | A | 156 | 1.982  | 16.587 | 26.447 | 1.00 | 17.85 |     | C |
| ANISOU | 798 | CB  | ARG | A | 156 | 3078   | 1779   | 1925   | -268 | -209  | 103 | C |
| ATOM   | 799 | CG  | ARG | A | 156 | 2.832  | 17.769 | 25.976 | 1.00 | 18.11 |     | C |
| ANISOU | 799 | CG  | ARG | A | 156 | 3114   | 1787   | 1979   | -323 | -328  | 124 | C |
| ATOM   | 800 | CD  | ARG | A | 156 | 3.940  | 17.342 | 25.015 | 1.00 | 16.97 |     | C |
| ANISOU | 800 | CD  | ARG | A | 156 | 2835   | 1717   | 1895   | -385 | -376  | 178 | C |
| ATOM   | 801 | NE  | ARG | A | 156 | 4.728  | 16.209 | 25.513 | 1.00 | 18.14 |     | N |
| ANISOU | 801 | NE  | ARG | A | 156 | 2961   | 1894   | 2036   | -383 | -384  | 199 | N |
| ATOM   | 802 | CZ  | ARG | A | 156 | 5.976  | 15.944 | 25.124 | 1.00 | 21.54 |     | C |
| ANISOU | 802 | CZ  | ARG | A | 156 | 3303   | 2384   | 2498   | -424 | -453  | 246 | C |
| ATOM   | 803 | NH1 | ARG | A | 156 | 6.583  | 16.746 | 24.251 | 1.00 | 18.12 |     | N |
| ANISOU | 803 | NH1 | ARG | A | 156 | 2793   | 1998   | 2094   | -485 | -517  | 285 | N |
| ATOM   | 804 | NH2 | ARG | A | 156 | 6.622  | 14.886 | 25.609 | 1.00 | 21.10 |     | N |
| ANISOU | 804 | NH2 | ARG | A | 156 | 3229   | 2345   | 2441   | -405 | -463  | 260 | N |
| ATOM   | 805 | C   | ARG | A | 156 | 0.105  | 15.750 | 27.845 | 1.00 | 20.33 |     | C |
| ANISOU | 805 | C   | ARG | A | 156 | 3484   | 2099   | 2143   | -175 | -35   | 61  | C |
| ATOM   | 806 | O   | ARG | A | 156 | 0.418  | 15.046 | 28.811 | 1.00 | 17.58 |     | O |
| ANISOU | 806 | O   | ARG | A | 156 | 3194   | 1746   | 1738   | -180 | -39   | 78  | O |
| ATOM   | 807 | N   | VAL | A | 157 | -0.934 | 15.483 | 27.062 | 1.00 | 18.38 |     | N |
| ANISOU | 807 | N   | VAL | A | 157 | 3146   | 1894   | 1943   | -155 | 55    | 57  | N |
| ATOM   | 808 | CA  | VAL | A | 157 | -1.586 | 14.187 | 27.129 | 1.00 | 19.66 |     | C |
| ANISOU | 808 | CA  | VAL | A | 157 | 3257   | 2101   | 2111   | -157 | 141   | 83  | C |
| ATOM   | 809 | CB  | VAL | A | 157 | -2.930 | 14.184 | 26.402 | 1.00 | 21.74 |     | C |
| ANISOU | 809 | CB  | VAL | A | 157 | 3437   | 2409   | 2415   | -134 | 235   | 78  | C |
| ATOM   | 810 | CG1 | VAL | A | 157 | -3.543 | 12.793 | 26.455 | 1.00 | 22.32 |     | C |
| ANISOU | 810 | CG1 | VAL | A | 157 | 3459   | 2521   | 2499   | -159 | 302   | 119 | C |
| ATOM   | 811 | CG2 | VAL | A | 157 | -3.868 | 15.187 | 27.045 | 1.00 | 21.43 |     | C |
| ANISOU | 811 | CG2 | VAL | A | 157 | 3457   | 2372   | 2313   | -64  | 288   | 39  | C |
| ATOM   | 812 | C   | VAL | A | 157 | -0.642 | 13.162 | 26.502 | 1.00 | 19.86 |     | C |
| ANISOU | 812 | C   | VAL | A | 157 | 3212   | 2133   | 2200   | -204 | 92    | 115 | C |
| ATOM   | 813 | O   | VAL | A | 157 | -0.002 | 13.438 | 25.486 | 1.00 | 15.63 |     | O |
| ANISOU | 813 | O   | VAL | A | 157 | 2605   | 1610   | 1725   | -225 | 43    | 114 | O |
| ATOM   | 814 | N   | VAL | A | 158 | -0.549 | 11.990 | 27.119 | 1.00 | 18.40 |     | N |
| ANISOU | 814 | N   | VAL | A | 158 | 3048   | 1946   | 1998   | -216 | 102   | 145 | N |
| ATOM   | 815 | CA  | VAL | A | 158 | 0.321  | 10.930 | 26.623 | 1.00 | 16.14 |     | C |
| ANISOU | 815 | CA  | VAL | A | 158 | 2707   | 1655   | 1771   | -237 | 51    | 165 | C |
| ATOM   | 816 | CB  | VAL | A | 158 | 1.240  | 10.398 | 27.739 | 1.00 | 18.95 |     | C |
| ANISOU | 816 | CB  | VAL | A | 158 | 3143   | 1975   | 2083   | -245 | -18   | 194 | C |
| ATOM   | 817 | CG1 | VAL | A | 158 | 2.171  | 9.321  | 27.189 | 1.00 | 16.19 |     | C |
| ANISOU | 817 | CG1 | VAL | A | 158 | 2730   | 1617   | 1803   | -245 | -77   | 208 | C |
| ATOM   | 818 | CG2 | VAL | A | 158 | 2.040  | 11.540 | 28.353 | 1.00 | 19.75 |     | C |
| ANISOU | 818 | CG2 | VAL | A | 158 | 3315   | 2057   | 2132   | -249 | -89   | 185 | C |
| ATOM   | 819 | C   | VAL | A | 158 | -0.506 | 9.772  | 26.078 | 1.00 | 17.58 |     | C |
| ANISOU | 819 | C   | VAL | A | 158 | 2830   | 1849   | 1999   | -246 | 107   | 179 | C |
| ATOM   | 820 | O   | VAL | A | 158 | -1.249 | 9.130  | 26.822 | 1.00 | 18.33 |     | O |
| ANISOU | 820 | O   | VAL | A | 158 | 2969   | 1939   | 2059   | -257 | 151   | 211 | O |

|        |     |     |     |   |     |        |        |        |      |       |      |   |
|--------|-----|-----|-----|---|-----|--------|--------|--------|------|-------|------|---|
| ATOM   | 821 | N   | MET | A | 159 | -0.384 | 9.523  | 24.773 | 1.00 | 14.67 |      | N |
| ANISOU | 821 | N   | MET | A | 159 | 2367   | 1502   | 1704   | -247 | 102   | 160  | N |
| ATOM   | 822 | CA  | MET | A | 159 | -1.065 | 8.415  | 24.117 | 1.00 | 16.18 |      | C |
| ANISOU | 822 | CA  | MET | A | 159 | 2511   | 1692   | 1945   | -259 | 132   | 165  | C |
| ATOM   | 823 | CB  | MET | A | 159 | -1.640 | 8.863  | 22.766 | 1.00 | 16.11 |      | C |
| ANISOU | 823 | CB  | MET | A | 159 | 2412   | 1728   | 1983   | -263 | 167   | 138  | C |
| ATOM   | 824 | CG  | MET | A | 159 | -2.547 | 10.091 | 22.919 | 1.00 | 21.82 |      | C |
| ANISOU | 824 | CG  | MET | A | 159 | 3136   | 2478   | 2676   | -259 | 223   | 139  | C |
| ATOM   | 825 | SD  | MET | A | 159 | -3.534 | 10.498 | 21.473 | 1.00 | 27.54 |      | S |
| ANISOU | 825 | SD  | MET | A | 159 | 3759   | 3249   | 3455   | -272 | 264   | 127  | S |
| ATOM   | 826 | CE  | MET | A | 159 | -4.768 | 9.200  | 21.567 | 1.00 | 21.28 |      | C |
| ANISOU | 826 | CE  | MET | A | 159 | 2951   | 2455   | 2682   | -304 | 316   | 163  | C |
| ATOM   | 827 | C   | MET | A | 159 | -0.104 | 7.242  | 23.957 | 1.00 | 16.42 |      | C |
| ANISOU | 827 | C   | MET | A | 159 | 2538   | 1686   | 2014   | -247 | 62    | 163  | C |
| ATOM   | 828 | O   | MET | A | 159 | 1.117  | 7.432  | 23.918 | 1.00 | 14.02 |      | O |
| ANISOU | 828 | O   | MET | A | 159 | 2223   | 1389   | 1716   | -223 | 1     | 149  | O |
| ATOM   | 829 | N   | LEU | A | 160 | -0.657 | 6.031  | 23.885 | 1.00 | 13.16 |      | N |
| ANISOU | 829 | N   | LEU | A | 160 | 2137   | 1234   | 1631   | -262 | 63    | 179  | N |
| ATOM   | 830 | CA  | LEU | A | 160 | 0.154  | 4.819  | 23.914 | 1.00 | 15.24 |      | C |
| ANISOU | 830 | CA  | LEU | A | 160 | 2422   | 1437   | 1930   | -239 | -15   | 176  | C |
| ATOM   | 831 | CB  | LEU | A | 160 | -0.042 | 4.081  | 25.242 | 1.00 | 15.28 |      | C |
| ANISOU | 831 | CB  | LEU | A | 160 | 2524   | 1380   | 1902   | -270 | -41   | 241  | C |
| ATOM   | 832 | CG  | LEU | A | 160 | 0.166  | 4.841  | 26.553 | 1.00 | 17.37 |      | C |
| ANISOU | 832 | CG  | LEU | A | 160 | 2856   | 1660   | 2083   | -282 | -31   | 278  | C |
| ATOM   | 833 | CD1 | LEU | A | 160 | -0.320 | 3.974  | 27.706 | 1.00 | 23.12 |      | C |
| ANISOU | 833 | CD1 | LEU | A | 160 | 3671   | 2343   | 2769   | -330 | -43   | 353  | C |
| ATOM   | 834 | CD2 | LEU | A | 160 | 1.628  | 5.249  | 26.741 | 1.00 | 18.14 |      | C |
| ANISOU | 834 | CD2 | LEU | A | 160 | 2956   | 1758   | 2179   | -241 | -105  | 257  | C |
| ATOM   | 835 | C   | LEU | A | 160 | -0.206 | 3.846  | 22.813 | 1.00 | 15.98 |      | C |
| ANISOU | 835 | C   | LEU | A | 160 | 2478   | 1505   | 2087   | -233 | -29   | 144  | C |
| ATOM   | 836 | O   | LEU | A | 160 | -1.369 | 3.720  | 22.434 | 1.00 | 17.49 |      | O |
| ANISOU | 836 | O   | LEU | A | 160 | 2656   | 1702   | 2288   | -278 | 17    | 158  | O |
| ATOM   | 837 | N   | PHE | A | 161 | 0.798  | 3.126  | 22.326 | 1.00 | 14.57 |      | N |
| ANISOU | 837 | N   | PHE | A | 161 | 2287   | 1301   | 1949   | -173 | -98   | 100  | N |
| ATOM   | 838 | CA  | PHE | A | 161 | 0.548  | 2.001  | 21.446 | 1.00 | 16.23 |      | C |
| ANISOU | 838 | CA  | PHE | A | 161 | 2496   | 1459   | 2212   | -155 | -133  | 59   | C |
| ATOM   | 839 | CB  | PHE | A | 161 | 0.503  | 2.417  | 19.970 | 1.00 | 14.45 |      | C |
| ANISOU | 839 | CB  | PHE | A | 161 | 2180   | 1311   | 1999   | -130 | -99   | -10  | C |
| ATOM   | 840 | CG  | PHE | A | 161 | 0.134  | 1.276  | 19.054 | 1.00 | 18.84 |      | C |
| ANISOU | 840 | CG  | PHE | A | 161 | 2753   | 1809   | 2598   | -114 | -140  | -61  | C |
| ATOM   | 841 | CD1 | PHE | A | 161 | -1.190 | 0.909  | 18.884 | 1.00 | 23.94 |      | C |
| ANISOU | 841 | CD1 | PHE | A | 161 | 3426   | 2412   | 3258   | -193 | -126  | -29  | C |
| ATOM   | 842 | CE1 | PHE | A | 161 | -1.537 | -0.165 | 18.062 | 1.00 | 24.05 |      | C |
| ANISOU | 842 | CE1 | PHE | A | 161 | 3473   | 2355   | 3310   | -188 | -184  | -74  | C |
| ATOM   | 843 | CZ  | PHE | A | 161 | -0.550 | -0.886 | 17.420 | 1.00 | 23.49 |      | C |
| ANISOU | 843 | CZ  | PHE | A | 161 | 3413   | 2255   | 3258   | -84  | -250  | -167 | C |
| ATOM   | 844 | CE2 | PHE | A | 161 | 0.773  | -0.540 | 17.593 | 1.00 | 25.53 |      | C |
| ANISOU | 844 | CE2 | PHE | A | 161 | 3629   | 2570   | 3502   | 8    | -251  | -202 | C |
| ATOM   | 845 | CD2 | PHE | A | 161 | 1.114  | 0.536  | 18.417 | 1.00 | 20.20 |      | C |
| ANISOU | 845 | CD2 | PHE | A | 161 | 2916   | 1966   | 2794   | -16  | -200  | -141 | C |
| ATOM   | 846 | C   | PHE | A | 161 | 1.597  | 0.919  | 21.664 | 1.00 | 17.59 |      | C |
| ANISOU | 846 | C   | PHE | A | 161 | 2709   | 1555   | 2420   | -82  | -231  | 35   | C |
| ATOM   | 847 | O   | PHE | A | 161 | 2.795  | 1.175  | 21.578 | 1.00 | 17.52 |      | O |
| ANISOU | 847 | O   | PHE | A | 161 | 2656   | 1591   | 2411   | -11  | -257  | 2    | O |
| ATOM   | 848 | N   | ASN | A | 162 | 1.135  | -0.287 | 21.979 | 1.00 | 18.44 |      | N |
| ANISOU | 848 | N   | ASN | A | 162 | 2900   | 1547   | 2560   | -104 | -293  | 61   | N |
| ATOM   | 849 | CA  | ASN | A | 162 | 2.021  | -1.424 | 22.161 | 1.00 | 20.29 |      | C |
| ANISOU | 849 | CA  | ASN | A | 162 | 3187   | 1682   | 2840   | -28  | -402  | 36   | C |
| ATOM   | 850 | CB  | ASN | A | 162 | 1.841  | -2.045 | 23.554 | 1.00 | 20.76 |      | C |
| ANISOU | 850 | CB  | ASN | A | 162 | 3353   | 1641   | 2893   | -87  | -463  | 135  | C |
| ATOM   | 851 | CG  | ASN | A | 162 | 2.902  | -3.097 | 23.873 | 1.00 | 27.48 |      | C |
| ANISOU | 851 | CG  | ASN | A | 162 | 4260   | 2386   | 3794   | 1    | -590  | 119  | C |
| ATOM   | 852 | OD1 | ASN | A | 162 | 3.369  | -3.810 | 22.989 | 1.00 | 26.72 |      | O |
| ANISOU | 852 | OD1 | ASN | A | 162 | 4155   | 2246   | 3753   | 98   | -648  | 32   | O |
| ATOM   | 853 | ND2 | ASN | A | 162 | 3.271  | -3.203 | 25.143 | 1.00 | 31.52 |      | N |
| ANISOU | 853 | ND2 | ASN | A | 162 | 4833   | 2859   | 4284   | -26  | -638  | 201  | N |
| ATOM   | 854 | C   | ASN | A | 162 | 1.697  | -2.419 | 21.064 | 1.00 | 24.44 |      | C |
| ANISOU | 854 | C   | ASN | A | 162 | 3732   | 2139   | 3417   | 7    | -451  | -36  | C |
| ATOM   | 855 | O   | ASN | A | 162 | 0.593  | -2.959 | 21.011 | 1.00 | 24.14 |      | O |
| ANISOU | 855 | O   | ASN | A | 162 | 3748   | 2030   | 3393   | -77  | -464  | 1    | O |

|        |     |     |     |   |     |        |         |        |      |       |      |   |
|--------|-----|-----|-----|---|-----|--------|---------|--------|------|-------|------|---|
| ATOM   | 856 | N   | ILE | A | 163 | 2.645  | -2.636  | 20.161 | 1.00 | 23.64 | N    |   |
| ANISOU | 856 | N   | ILE | A | 163 | 3580   | 2067    | 3337   | 130  | -477  | -139 | N |
| ATOM   | 857 | CA  | ILE | A | 163 | 2.360  | -3.421  | 18.973 | 1.00 | 25.49 | C    |   |
| ANISOU | 857 | CA  | ILE | A | 163 | 3830   | 2254    | 3601   | 177  | -513  | -232 | C |
| ATOM   | 858 | CB  | ILE | A | 163 | 3.358  | -3.112  | 17.841 | 1.00 | 27.64 | C    |   |
| ANISOU | 858 | CB  | ILE | A | 163 | 3998   | 2647    | 3856   | 306  | -483  | -348 | C |
| ATOM   | 859 | CG1 | ILE | A | 163 | 2.763  | -3.500  | 16.486 | 1.00 | 31.10 | C    |   |
| ANISOU | 859 | CG1 | ILE | A | 163 | 4440   | 3085    | 4291   | 321  | -480  | -439 | C |
| ATOM   | 860 | CD1 | ILE | A | 163 | 3.382  | -2.763  | 15.326 | 1.00 | 34.23 | C    |   |
| ANISOU | 860 | CD1 | ILE | A | 163 | 4710   | 3658    | 4636   | 394  | -404  | -522 | C |
| ATOM   | 861 | CG2 | ILE | A | 163 | 4.690  | -3.810  | 18.096 | 1.00 | 29.92 | C    |   |
| ANISOU | 861 | CG2 | ILE | A | 163 | 4291   | 2900    | 4176   | 453  | -564  | -398 | C |
| ATOM   | 862 | C   | ILE | A | 163 | 2.354  | -4.921  | 19.261 | 1.00 | 24.75 | C    |   |
| ANISOU | 862 | C   | ILE | A | 163 | 3864   | 1972    | 3567   | 208  | -649  | -240 | C |
| ATOM   | 863 | O   | ILE | A | 163 | 1.967  | -5.718  | 18.407 | 1.00 | 28.89 | O    |   |
| ANISOU | 863 | O   | ILE | A | 163 | 4439   | 2418    | 4120   | 232  | -705  | -311 | O |
| ATOM   | 864 | N   | GLU | A | 164 | 2.758  | -5.305  | 20.466 | 1.00 | 28.98 | N    |   |
| ANISOU | 864 | N   | GLU | A | 164 | 4462   | 2426    | 4121   | 202  | -716  | -165 | N |
| ATOM   | 865 | CA  | GLU | A | 164 | 2.895  | -6.729  | 20.779 | 1.00 | 34.08 | C    |   |
| ANISOU | 865 | CA  | GLU | A | 164 | 5236   | 2881    | 4833   | 240  | -867  | -167 | C |
| ATOM   | 866 | CB  | GLU | A | 164 | 3.463  | -6.944  | 22.178 | 1.00 | 33.40 | C    |   |
| ANISOU | 866 | CB  | GLU | A | 164 | 5202   | 2733    | 4755   | 229  | -932  | -70  | C |
| ATOM   | 867 | CG  | GLU | A | 164 | 3.791  | -8.406  | 22.451 | 1.00 | 46.32 | C    |   |
| ANISOU | 867 | CG  | GLU | A | 164 | 6968   | 4165    | 6468   | 290  | -1107 | -77  | C |
| ATOM   | 868 | CD  | GLU | A | 164 | 4.760  | -8.586  | 23.593 | 1.00 | 58.65 | C    |   |
| ANISOU | 868 | CD  | GLU | A | 164 | 8556   | 5687    | 8043   | 335  | -1181 | -14  | C |
| ATOM   | 869 | OE1 | GLU | A | 164 | 4.730  | -7.761  | 24.529 | 1.00 | 62.85 | O    |   |
| ANISOU | 869 | OE1 | GLU | A | 164 | 9055   | 6307    | 8516   | 247  | -1114 | 84   | O |
| ATOM   | 870 | OE2 | GLU | A | 164 | 5.549  | -9.555  | 23.558 | 1.00 | 65.57 | O    |   |
| ANISOU | 870 | OE2 | GLU | A | 164 | 9488   | 6439    | 8987   | 464  | -1314 | -66  | O |
| ATOM   | 871 | C   | GLU | A | 164 | 1.589  | -7.509  | 20.609 | 1.00 | 34.32 | C    |   |
| ANISOU | 871 | C   | GLU | A | 164 | 5368   | 2783    | 4888   | 121  | -924  | -125 | C |
| ATOM   | 872 | O   | GLU | A | 164 | 0.568  | -7.175  | 21.198 | 1.00 | 32.42 | O    |   |
| ANISOU | 872 | O   | GLU | A | 164 | 5136   | 2561    | 4620   | -34  | -876  | -10  | O |
| ATOM   | 873 | N   | ASN | A | 165 | 1.629  | -8.553  | 19.795 | 1.00 | 40.48 | N    |   |
| ANISOU | 873 | N   | ASN | A | 165 | 6223   | 3438    | 5720   | 195  | -1031 | -220 | N |
| ATOM   | 874 | CA  | ASN | A | 165 | 0.424  | -9.329  | 19.526 | 1.00 | 53.24 | C    |   |
| ANISOU | 874 | CA  | ASN | A | 165 | 7940   | 4924    | 7365   | 74   | -1107 | -182 | C |
| ATOM   | 875 | CB  | ASN | A | 165 | -0.073 | -10.001 | 20.809 | 1.00 | 64.46 | C    |   |
| ANISOU | 875 | CB  | ASN | A | 165 | 9469   | 6210    | 8812   | -58  | -1202 | -23  | C |
| ATOM   | 876 | CG  | ASN | A | 165 | 0.929  | -10.986 | 21.374 | 1.00 | 72.92 | C    |   |
| ANISOU | 876 | CG  | ASN | A | 165 | 10643  | 7122    | 9943   | 51   | -1356 | -39  | C |
| ATOM   | 877 | OD1 | ASN | A | 165 | 1.554  | -11.747 | 20.632 | 1.00 | 74.67 | O    |   |
| ANISOU | 877 | OD1 | ASN | A | 165 | 10917  | 7239    | 10214  | 201  | -1456 | -171 | O |
| ATOM   | 878 | ND2 | ASN | A | 165 | 1.089  | -10.978 | 22.693 | 1.00 | 75.71 | N    |   |
| ANISOU | 878 | ND2 | ASN | A | 165 | 11024  | 7455    | 10286  | -16  | -1378 | 93   | N |
| ATOM   | 879 | C   | ASN | A | 165 | -0.713 | -8.528  | 18.876 | 1.00 | 47.58 | C    |   |
| ANISOU | 879 | C   | ASN | A | 165 | 7146   | 4329    | 6604   | -45  | -989  | -160 | C |
| ATOM   | 880 | O   | ASN | A | 165 | -1.853 | -8.990  | 18.851 | 1.00 | 45.37 | O    |   |
| ANISOU | 880 | O   | ASN | A | 165 | 6924   | 3972    | 6341   | -183 | -1036 | -87  | O |
| ATOM   | 881 | N   | TRP | A | 166 | -0.419 | -7.333  | 18.364 | 1.00 | 34.27 | N    |   |
| ANISOU | 881 | N   | TRP | A | 166 | 5325   | 2831    | 4864   | 1    | -848  | -211 | N |
| ATOM   | 882 | CA  | TRP | A | 166 | -1.406 | -6.643  | 17.539 | 1.00 | 29.06 | C    |   |
| ANISOU | 882 | CA  | TRP | A | 166 | 4595   | 2275    | 4172   | -85  | -756  | -212 | C |
| ATOM   | 883 | CB  | TRP | A | 166 | -0.930 | -5.248  | 17.104 | 1.00 | 25.92 | C    |   |
| ANISOU | 883 | CB  | TRP | A | 166 | 4052   | 2080    | 3715   | -33  | -612  | -254 | C |
| ATOM   | 884 | CG  | TRP | A | 166 | -1.785 | -4.665  | 16.025 | 1.00 | 27.72 | C    |   |
| ANISOU | 884 | CG  | TRP | A | 166 | 4216   | 2400    | 3916   | -92  | -543  | -280 | C |
| ATOM   | 885 | CD1 | TRP | A | 166 | -3.136 | -4.481  | 16.061 | 1.00 | 28.68 | C    |   |
| ANISOU | 885 | CD1 | TRP | A | 166 | 4333   | 2524    | 4040   | -237 | -517  | -191 | C |
| ATOM   | 886 | NE1 | TRP | A | 166 | -3.572 | -3.925  | 14.878 | 1.00 | 26.07 | N    |   |
| ANISOU | 886 | NE1 | TRP | A | 166 | 3934   | 2289    | 3684   | -248 | -465  | -244 | N |
| ATOM   | 887 | CE2 | TRP | A | 166 | -2.492 | -3.730  | 14.059 | 1.00 | 33.07 | C    |   |
| ANISOU | 887 | CE2 | TRP | A | 166 | 4780   | 3244    | 4541   | -114 | -450  | -367 | C |
| ATOM   | 888 | CD2 | TRP | A | 166 | -1.349 | -4.189  | 14.747 | 1.00 | 31.67 | C    |   |
| ANISOU | 888 | CD2 | TRP | A | 166 | 4639   | 3013    | 4380   | -8   | -495  | -393 | C |
| ATOM   | 889 | CE3 | TRP | A | 166 | -0.104 | -4.103  | 14.117 | 1.00 | 37.92 | C    |   |
| ANISOU | 889 | CE3 | TRP | A | 166 | 5382   | 3881    | 5146   | 143  | -484  | -508 | C |
| ATOM   | 890 | CZ3 | TRP | A | 166 | -0.040 | -3.575  | 12.842 | 1.00 | 43.57 | C    |   |
| ANISOU | 890 | CZ3 | TRP | A | 166 | 6019   | 4726    | 5810   | 176  | -427  | -589 | C |

|        |     |     |     |   |     |        |         |        |      |       |      |   |
|--------|-----|-----|-----|---|-----|--------|---------|--------|------|-------|------|---|
| ATOM   | 891 | CH2 | TRP | A | 166 | -1.193 | -3.128  | 12.184 | 1.00 | 45.32 | C    |   |
| ANISOU | 891 | CH2 | TRP | A | 166 | 6218   | 4987    | 6014   | 63   | -389  | -559 | C |
| ATOM   | 892 | CZ2 | TRP | A | 166 | -2.425 | -3.196  | 12.774 | 1.00 | 42.25 | C    |   |
| ANISOU | 892 | CZ2 | TRP | A | 166 | 5871   | 4522    | 5661   | -79  | -402  | -450 | C |
| ATOM   | 893 | C   | TRP | A | 166 | -1.675 | -7.521  | 16.325 | 1.00 | 31.07 | C    |   |
| ANISOU | 893 | C   | TRP | A | 166 | 4917   | 2437    | 4452   | -49  | -847  | -319 | C |
| ATOM   | 894 | O   | TRP | A | 166 | -0.745 | -7.964  | 15.646 | 1.00 | 32.41 | O    |   |
| ANISOU | 894 | O   | TRP | A | 166 | 5105   | 2582    | 4627   | 108  | -894  | -456 | O |
| ATOM   | 895 | N   | GLN | A | 167 | -2.948 | -7.802  | 16.075 | 1.00 | 28.65 | N    |   |
| ANISOU | 895 | N   | GLN | A | 167 | 4647   | 2079    | 4158   | -192 | -877  | -258 | N |
| ATOM   | 896 | CA  | GLN | A | 167 | -3.338 | -8.587  | 14.911 | 1.00 | 36.23 | C    |   |
| ANISOU | 896 | CA  | GLN | A | 167 | 5683   | 2947    | 5137   | -182 | -972  | -353 | C |
| ATOM   | 897 | CB  | GLN | A | 167 | -4.057 | -9.861  | 15.345 | 1.00 | 42.28 | C    |   |
| ANISOU | 897 | CB  | GLN | A | 167 | 6600   | 3498    | 5967   | -291 | -1139 | -275 | C |
| ATOM   | 898 | CG  | GLN | A | 167 | -3.165 | -10.805 | 16.133 | 1.00 | 54.60 | C    |   |
| ANISOU | 898 | CG  | GLN | A | 167 | 8273   | 4895    | 7575   | -203 | -1264 | -284 | C |
| ATOM   | 899 | CD  | GLN | A | 167 | -3.852 | -12.110 | 16.474 | 1.00 | 66.94 | C    |   |
| ANISOU | 899 | CD  | GLN | A | 167 | 10002  | 6229    | 9205   | -318 | -1454 | -206 | C |
| ATOM   | 900 | OE1 | GLN | A | 167 | -5.071 | -12.158 | 16.636 | 1.00 | 71.55 | O    |   |
| ANISOU | 900 | OE1 | GLN | A | 167 | 10587  | 6805    | 9795   | -511 | -1466 | -76  | O |
| ATOM   | 901 | NE2 | GLN | A | 167 | -3.072 | -13.179 | 16.590 | 1.00 | 71.76 | N    |   |
| ANISOU | 901 | NE2 | GLN | A | 167 | 10747  | 6649    | 9868   | -202 | -1613 | -277 | N |
| ATOM   | 902 | C   | GLN | A | 167 | -4.197 | -7.751  | 13.965 | 1.00 | 32.47 | C    |   |
| ANISOU | 902 | C   | GLN | A | 167 | 5111   | 2608    | 4619   | -258 | -877  | -357 | C |
| ATOM   | 903 | O   | GLN | A | 167 | -5.370 | -7.482  | 14.235 | 1.00 | 28.01 | O    |   |
| ANISOU | 903 | O   | GLN | A | 167 | 4516   | 2066    | 4060   | -419 | -850  | -234 | O |
| ATOM   | 904 | N   | SER | A | 168 | -3.591 | -7.332  | 12.861 | 1.00 | 36.81 | N    |   |
| ANISOU | 904 | N   | SER | A | 168 | 5604   | 3260    | 5122   | -140 | -826  | -493 | N |
| ATOM   | 905 | CA  | SER | A | 168 | -4.219 | -6.387  | 11.943 | 1.00 | 37.26 | C    |   |
| ANISOU | 905 | CA  | SER | A | 168 | 5557   | 3468    | 5130   | -197 | -729  | -499 | C |
| ATOM   | 906 | CB  | SER | A | 168 | -3.271 | -6.057  | 10.792 | 1.00 | 38.58 | C    |   |
| ANISOU | 906 | CB  | SER | A | 168 | 5673   | 3750    | 5236   | -47  | -684  | -654 | C |
| ATOM   | 907 | OG  | SER | A | 168 | -2.951 | -7.228  | 10.061 | 1.00 | 44.08 | O    |   |
| ANISOU | 907 | OG  | SER | A | 168 | 6489   | 4322    | 5935   | 51   | -807  | -789 | O |
| ATOM   | 908 | C   | SER | A | 168 | -5.542 | -6.894  | 11.388 | 1.00 | 39.56 | C    |   |
| ANISOU | 908 | C   | SER | A | 168 | 5906   | 3682    | 5444   | -338 | -806  | -459 | C |
| ATOM   | 909 | O   | SER | A | 168 | -6.388 | -6.103  | 10.976 | 1.00 | 42.58 | O    |   |
| ANISOU | 909 | O   | SER | A | 168 | 6200   | 4175    | 5805   | -434 | -732  | -404 | O |
| ATOM   | 910 | N   | GLN | A | 169 | -5.720 | -8.212  | 11.380 | 1.00 | 38.99 | N    |   |
| ANISOU | 910 | N   | GLN | A | 169 | 5984   | 3412    | 5418   | -352 | -966  | -483 | N |
| ATOM   | 911 | CA  | GLN | A | 169 | -6.928 | -8.808  | 10.822 | 1.00 | 48.86 | C    |   |
| ANISOU | 911 | CA  | GLN | A | 169 | 7302   | 4570    | 6692   | -494 | -1068 | -445 | C |
| ATOM   | 912 | CB  | GLN | A | 169 | -6.658 | -10.238 | 10.339 | 1.00 | 51.69 | C    |   |
| ANISOU | 912 | CB  | GLN | A | 169 | 7848   | 4712    | 7080   | -432 | -1260 | -559 | C |
| ATOM   | 913 | CG  | GLN | A | 169 | -6.559 | -11.279 | 11.448 | 1.00 | 61.21 | C    |   |
| ANISOU | 913 | CG  | GLN | A | 169 | 9180   | 5717    | 8360   | -464 | -1394 | -481 | C |
| ATOM   | 914 | CD  | GLN | A | 169 | -5.265 | -11.195 | 12.249 | 1.00 | 65.76 | C    |   |
| ANISOU | 914 | CD  | GLN | A | 169 | 9742   | 6304    | 8940   | -306 | -1350 | -518 | C |
| ATOM   | 915 | OE1 | GLN | A | 169 | -4.394 | -10.368 | 11.974 | 1.00 | 59.54 | O    |   |
| ANISOU | 915 | OE1 | GLN | A | 169 | 8845   | 5676    | 8099   | -170 | -1221 | -603 | O |
| ATOM   | 916 | NE2 | GLN | A | 169 | -5.136 | -12.065 | 13.246 | 1.00 | 71.43 | N    |   |
| ANISOU | 916 | NE2 | GLN | A | 169 | 10570  | 6851    | 9721   | -333 | -1470 | -443 | N |
| ATOM   | 917 | C   | GLN | A | 169 | -8.094 | -8.788  | 11.812 | 1.00 | 52.51 | C    |   |
| ANISOU | 917 | C   | GLN | A | 169 | 7740   | 5012    | 7200   | -692 | -1071 | -242 | C |
| ATOM   | 918 | O   | GLN | A | 169 | -9.245 | -9.004  | 11.431 | 1.00 | 56.47 | O    |   |
| ANISOU | 918 | O   | GLN | A | 169 | 8247   | 5489    | 7719   | -841 | -1126 | -170 | O |
| ATOM   | 919 | N   | GLU | A | 170 | -7.791 | -8.532  | 13.080 | 1.00 | 43.42 | N    |   |
| ANISOU | 919 | N   | GLU | A | 170 | 6556   | 3882    | 6060   | -696 | -1013 | -147 | N |
| ATOM   | 920 | CA  | GLU | A | 170 | -8.826 | -8.437  | 14.105 | 1.00 | 40.70 | C    |   |
| ANISOU | 920 | CA  | GLU | A | 170 | 6172   | 3555    | 5738   | -870 | -991  | 47   | C |
| ATOM   | 921 | CB  | GLU | A | 170 | -8.388 | -9.167  | 15.373 | 1.00 | 45.96 | C    |   |
| ANISOU | 921 | CB  | GLU | A | 170 | 6929   | 4101    | 6435   | -877 | -1063 | 122  | C |
| ATOM   | 922 | CG  | GLU | A | 170 | -8.139 | -10.656 | 15.165 | 1.00 | 56.03 | C    |   |
| ANISOU | 922 | CG  | GLU | A | 170 | 8389   | 5135    | 7767   | -866 | -1275 | 73   | C |
| ATOM   | 923 | CD  | GLU | A | 170 | -7.894 | -11.398 | 16.466 | 1.00 | 61.60 | C    |   |
| ANISOU | 923 | CD  | GLU | A | 170 | 9183   | 5713    | 8507   | -909 | -1363 | 183  | C |
| ATOM   | 924 | OE1 | GLU | A | 170 | -7.659 | -10.731 | 17.497 | 1.00 | 59.44 | O    |   |
| ANISOU | 924 | OE1 | GLU | A | 170 | 8832   | 5549    | 8202   | -910 | -1249 | 266  | O |
| ATOM   | 925 | OE2 | GLU | A | 170 | -7.935 | -12.648 | 16.456 | 1.00 | 69.20 | O    |   |
| ANISOU | 925 | OE2 | GLU | A | 170 | 10305  | 6461    | 9527   | -944 | -1557 | 188  | O |

|        |     |     |     |   |     |         |        |        |       |       |      |   |
|--------|-----|-----|-----|---|-----|---------|--------|--------|-------|-------|------|---|
| ATOM   | 926 | C   | GLU | A | 170 | -9.153  | -6.978 | 14.420 | 1.00  | 36.81 | C    |   |
| ANISOU | 926 | C   | GLU | A | 170 | 5508    | 3277   | 5200   | -888  | -801  | 113  | C |
| ATOM   | 927 | O   | GLU | A | 170 | -10.309 | -6.618 | 14.637 | 1.00  | 34.05 | O    |   |
| ANISOU | 927 | O   | GLU | A | 170 | 5080    | 3003   | 4853   | -1025 | -755  | 238  | O |
| ATOM   | 928 | N   | ILE | A | 171 | -8.123  | -6.142 | 14.451 | 1.00  | 27.93 | N    |   |
| ANISOU | 928 | N   | ILE | A | 171 | 4326    | 2251   | 4036   | -748  | -698  | 29   | N |
| ATOM   | 929 | CA  | ILE | A | 171 | -8.306  | -4.706 | 14.629 | 1.00  | 25.16 | C    |   |
| ANISOU | 929 | CA  | ILE | A | 171 | 3832    | 2086   | 3643   | -746  | -536  | 68   | C |
| ATOM   | 930 | CB  | ILE | A | 171 | -7.897  | -4.250 | 16.032 | 1.00  | 25.03 | C    |   |
| ANISOU | 930 | CB  | ILE | A | 171 | 3795    | 2108   | 3607   | -729  | -463  | 143  | C |
| ATOM   | 931 | CG1 | ILE | A | 171 | -8.773  | -4.933 | 17.090 | 1.00  | 32.32 | C    |   |
| ANISOU | 931 | CG1 | ILE | A | 171 | 4761    | 2968   | 4552   | -867  | -508  | 296  | C |
| ATOM   | 932 | CD1 | ILE | A | 171 | -8.290  | -4.723 | 18.500 | 1.00  | 31.75 | C    |   |
| ANISOU | 932 | CD1 | ILE | A | 171 | 4701    | 2912   | 4450   | -850  | -463  | 364  | C |
| ATOM   | 933 | CG2 | ILE | A | 171 | -7.967  | -2.720 | 16.145 | 1.00  | 25.72 | C    |   |
| ANISOU | 933 | CG2 | ILE | A | 171 | 3753    | 2370   | 3649   | -704  | -310  | 157  | C |
| ATOM   | 934 | C   | ILE | A | 171 | -7.437  | -4.017 | 13.597 | 1.00  | 29.77 | C    |   |
| ANISOU | 934 | C   | ILE | A | 171 | 4366    | 2759   | 4189   | -617  | -483  | -72  | C |
| ATOM   | 935 | O   | ILE | A | 171 | -6.210  | -4.102 | 13.657 | 1.00  | 31.15 | O    |   |
| ANISOU | 935 | O   | ILE | A | 171 | 4566    | 2921   | 4349   | -489  | -489  | -160 | O |
| ATOM   | 936 | N   | THR | A | 172 | -8.074  | -3.354 | 12.635 | 1.00  | 27.50 | N    |   |
| ANISOU | 936 | N   | THR | A | 172 | 3999    | 2568   | 3883   | -655  | -437  | -84  | N |
| ATOM   | 937 | CA  | THR | A | 172 | -7.350  | -2.840 | 11.481 | 1.00  | 22.49 | C    |   |
| ANISOU | 937 | CA  | THR | A | 172 | 3325    | 2018   | 3203   | -554  | -405  | -209 | C |
| ATOM   | 938 | CB  | THR | A | 172 | -8.291  | -2.582 | 10.279 | 1.00  | 24.11 | C    |   |
| ANISOU | 938 | CB  | THR | A | 172 | 3486    | 2277   | 3396   | -629  | -412  | -215 | C |
| ATOM   | 939 | OG1 | THR | A | 172 | -9.162  | -1.483 | 10.577 | 1.00  | 24.92 | O    |   |
| ANISOU | 939 | OG1 | THR | A | 172 | 3475    | 2491   | 3503   | -709  | -317  | -105 | O |
| ATOM   | 940 | CG2 | THR | A | 172 | -9.119  | -3.825 | 9.957  | 1.00  | 26.18 | C    |   |
| ANISOU | 940 | CG2 | THR | A | 172 | 3852    | 2399   | 3698   | -721  | -548  | -202 | C |
| ATOM   | 941 | C   | THR | A | 172 | -6.608  | -1.554 | 11.788 | 1.00  | 22.22 | C    |   |
| ANISOU | 941 | C   | THR | A | 172 | 3191    | 2122   | 3130   | -484  | -285  | -211 | C |
| ATOM   | 942 | O   | THR | A | 172 | -6.923  | -0.851 | 12.756 | 1.00  | 22.07 | O    |   |
| ANISOU | 942 | O   | THR | A | 172 | 3124    | 2147   | 3116   | -525  | -214  | -115 | O |
| ATOM   | 943 | N   | PHE | A | 173 | -5.620  | -1.248 | 10.951 | 1.00  | 22.02 | N    |   |
| ANISOU | 943 | N   | PHE | A | 173 | 3136    | 2169   | 3060   | -380  | -266  | -319 | N |
| ATOM   | 944 | CA  | PHE | A | 173 | -4.907  | 0.023  | 11.035 | 1.00  | 21.35 | C    |   |
| ANISOU | 944 | CA  | PHE | A | 173 | 2952    | 2223   | 2935   | -331  | -169  | -316 | C |
| ATOM   | 945 | CB  | PHE | A | 173 | -3.911  | 0.154  | 9.873  | 1.00  | 25.27 | C    |   |
| ANISOU | 945 | CB  | PHE | A | 173 | 3413    | 2813   | 3375   | -233  | -163  | -432 | C |
| ATOM   | 946 | CG  | PHE | A | 173 | -2.822  | 1.165  | 10.115 | 1.00  | 31.22 | C    |   |
| ANISOU | 946 | CG  | PHE | A | 173 | 4082    | 3687   | 4093   | -171  | -93   | -430 | C |
| ATOM   | 947 | CD1 | PHE | A | 173 | -1.551  | 0.759  | 10.490 | 1.00  | 34.62 | C    |   |
| ANISOU | 947 | CD1 | PHE | A | 173 | 4524    | 4114   | 4517   | -61   | -110  | -484 | C |
| ATOM   | 948 | CE1 | PHE | A | 173 | -0.546  | 1.691  | 10.719 | 1.00  | 34.71 | C    |   |
| ANISOU | 948 | CE1 | PHE | A | 173 | 4449    | 4240   | 4497   | -20   | -57   | -468 | C |
| ATOM   | 949 | CZ  | PHE | A | 173 | -0.810  | 3.042  | 10.577 | 1.00  | 32.84 | C    |   |
| ANISOU | 949 | CZ  | PHE | A | 173 | 4131    | 4108   | 4237   | -90   | 6     | -401 | C |
| ATOM   | 950 | CE2 | PHE | A | 173 | -2.073  | 3.458  | 10.198 | 1.00  | 32.48 | C    |   |
| ANISOU | 950 | CE2 | PHE | A | 173 | 4081    | 4058   | 4201   | -187  | 22    | -355 | C |
| ATOM   | 951 | CD2 | PHE | A | 173 | -3.072  | 2.522  | 9.972  | 1.00  | 33.48 | C    |   |
| ANISOU | 951 | CD2 | PHE | A | 173 | 4278    | 4085   | 4358   | -226  | -23   | -367 | C |
| ATOM   | 952 | C   | PHE | A | 173 | -5.894  | 1.194  | 11.027 | 1.00  | 23.04 | C    |   |
| ANISOU | 952 | C   | PHE | A | 173 | 3081    | 2525   | 3150   | -423  | -95   | -225 | C |
| ATOM   | 953 | O   | PHE | A | 173 | -5.768  | 2.132  | 11.822 | 1.00  | 20.38 | O    |   |
| ANISOU | 953 | O   | PHE | A | 173 | 2697    | 2238   | 2809   | -423  | -29   | -166 | O |
| ATOM   | 954 | N   | ASP | A | 174 | -6.873  | 1.139  | 10.125 | 1.00  | 19.66 | N    |   |
| ANISOU | 954 | N   | ASP | A | 174 | 2637    | 2108   | 2725   | -494  | -116  | -218 | N |
| ATOM   | 955 | CA  | ASP | A | 174 | -7.887  | 2.190  | 10.032 | 1.00  | 21.25 | C    |   |
| ANISOU | 955 | CA  | ASP | A | 174 | 2751    | 2387   | 2934   | -572  | -58   | -133 | C |
| ATOM   | 956 | CB  | ASP | A | 174 | -8.852  | 1.923  | 8.876  | 1.00  | 19.83 | C    |   |
| ANISOU | 956 | CB  | ASP | A | 174 | 2562    | 2215   | 2758   | -647  | -106  | -136 | C |
| ATOM   | 957 | CG  | ASP | A | 174 | -8.302  | 2.350  | 7.529  | 1.00  | 23.25 | C    |   |
| ANISOU | 957 | CG  | ASP | A | 174 | 2962    | 2740   | 3131   | -608  | -106  | -219 | C |
| ATOM   | 958 | OD1 | ASP | A | 174 | -7.200  | 2.944  | 7.466  | 1.00  | 20.19 | O    |   |
| ANISOU | 958 | OD1 | ASP | A | 174 | 2543    | 2428   | 2701   | -530  | -62   | -263 | O |
| ATOM   | 959 | OD2 | ASP | A | 174 | -8.997  | 2.096  | 6.526  | 1.00  | 28.20 | O    |   |
| ANISOU | 959 | OD2 | ASP | A | 174 | 3593    | 3374   | 3749   | -666  | -155  | -232 | O |
| ATOM   | 960 | C   | ASP | A | 174 | -8.694  | 2.322  | 11.319 | 1.00  | 20.73 | C    |   |
| ANISOU | 960 | C   | ASP | A | 174 | 2679    | 2291   | 2909   | -629  | -23   | -22  | C |

|        |     |     |     |   |     |         |        |        |       |       |      |   |
|--------|-----|-----|-----|---|-----|---------|--------|--------|-------|-------|------|---|
| ATOM   | 961 | O   | ASP | A | 174 | -9.000  | 3.431  | 11.752 | 1.00  | 16.99 |      | O |
| ANISOU | 961 | O   | ASP | A | 174 | 2137    | 1888   | 2432   | -634  | 50    | 34   | O |
| ATOM   | 962 | N   | GLU | A | 175 | -9.068  | 1.191  | 11.914 | 1.00  | 18.30 |      | N |
| ANISOU | 962 | N   | GLU | A | 175 | 2443    | 1877   | 2633   | -673  | -81   | 11   | N |
| ATOM   | 963 | CA  | GLU | A | 175 | -9.871  | 1.222  | 13.126 | 1.00  | 21.03 |      | C |
| ANISOU | 963 | CA  | GLU | A | 175 | 2776    | 2213   | 3001   | -736  | -45   | 126  | C |
| ATOM   | 964 | CB  | GLU | A | 175 | -10.313 | -0.193 | 13.533 | 1.00  | 24.58 |      | C |
| ANISOU | 964 | CB  | GLU | A | 175 | 3312    | 2541   | 3485   | -810  | -137  | 170  | C |
| ATOM   | 965 | CG  | GLU | A | 175 | -11.426 | -0.739 | 12.661 | 1.00  | 25.45 |      | C |
| ANISOU | 965 | CG  | GLU | A | 175 | 3413    | 2630   | 3628   | -916  | -205  | 203  | C |
| ATOM   | 966 | CD  | GLU | A | 175 | -11.772 | -2.187 | 12.975 | 1.00  | 28.44 |      | C |
| ANISOU | 966 | CD  | GLU | A | 175 | 3894    | 2867   | 4043   | -1000 | -325  | 246  | C |
| ATOM   | 967 | OE1 | GLU | A | 175 | -10.855 | -2.970 | 13.287 | 1.00  | 23.41 |      | O |
| ANISOU | 967 | OE1 | GLU | A | 175 | 3365    | 2123   | 3409   | -940  | -390  | 188  | O |
| ATOM   | 968 | OE2 | GLU | A | 175 | -12.968 | -2.533 | 12.909 | 1.00  | 39.54 |      | O |
| ANISOU | 968 | OE2 | GLU | A | 175 | 5271    | 4271   | 5481   | -1128 | -362  | 346  | O |
| ATOM   | 969 | C   | GLU | A | 175 | -9.106  | 1.897  | 14.255 | 1.00  | 22.00 |      | C |
| ANISOU | 969 | C   | GLU | A | 175 | 2898    | 2364   | 3096   | -667  | 24    | 135  | C |
| ATOM   | 970 | O   | GLU | A | 175 | -9.692  | 2.578  | 15.093 | 1.00  | 17.69 |      | O |
| ANISOU | 970 | O   | GLU | A | 175 | 2307    | 1871   | 2542   | -689  | 96    | 211  | O |
| ATOM   | 971 | N   | ILE | A | 176 | -7.790  | 1.726  | 14.258 | 1.00  | 18.97 |      | N |
| ANISOU | 971 | N   | ILE | A | 176 | 2561    | 1952   | 2693   | -580  | 0     | 55   | N |
| ATOM   | 972 | CA  | ILE | A | 176 | -6.966  | 2.332  | 15.297 | 1.00  | 18.37 |      | C |
| ANISOU | 972 | CA  | ILE | A | 176 | 2492    | 1897   | 2591   | -521  | 46    | 64   | C |
| ATOM   | 973 | CB  | ILE | A | 176 | -5.615  | 1.602  | 15.443 | 1.00  | 20.34 |      | C |
| ANISOU | 973 | CB  | ILE | A | 176 | 2810    | 2083   | 2837   | -439  | -15   | -6   | C |
| ATOM   | 974 | CG1 | ILE | A | 176 | -5.857  | 0.200  | 16.016 | 1.00  | 22.80 |      | C |
| ANISOU | 974 | CG1 | ILE | A | 176 | 3217    | 2265   | 3181   | -475  | -96   | 25   | C |
| ATOM   | 975 | CD1 | ILE | A | 176 | -4.665  | -0.714 | 15.906 | 1.00  | 29.50 |      | C |
| ANISOU | 975 | CD1 | ILE | A | 176 | 4137    | 3031   | 4042   | -384  | -180  | -57  | C |
| ATOM   | 976 | CG2 | ILE | A | 176 | -4.667  | 2.375  | 16.354 | 1.00  | 24.73 |      | C |
| ANISOU | 976 | CG2 | ILE | A | 176 | 3359    | 2675   | 3361   | -382  | 25    | 1    | C |
| ATOM   | 977 | C   | ILE | A | 176 | -6.792  | 3.840  | 15.072 | 1.00  | 20.71 |      | C |
| ANISOU | 977 | C   | ILE | A | 176 | 2709    | 2301   | 2859   | -490  | 120   | 57   | C |
| ATOM   | 978 | O   | ILE | A | 176 | -6.774  | 4.609  | 16.029 | 1.00  | 15.76 |      | O |
| ANISOU | 978 | O   | ILE | A | 176 | 2076    | 1700   | 2211   | -478  | 171   | 98   | O |
| ATOM   | 979 | N   | LEU | A | 177 | -6.705  | 4.267  | 13.815 | 1.00  | 15.15 |      | N |
| ANISOU | 979 | N   | LEU | A | 177 | 1952    | 1654   | 2148   | -482  | 116   | 9    | N |
| ATOM   | 980 | CA  | LEU | A | 177 | -6.638  | 5.702  | 13.525 | 1.00  | 14.84 |      | C |
| ANISOU | 980 | CA  | LEU | A | 177 | 1842    | 1706   | 2089   | -470  | 167   | 18   | C |
| ATOM   | 981 | CB  | LEU | A | 177 | -6.216  | 5.967  | 12.076 | 1.00  | 15.91 |      | C |
| ANISOU | 981 | CB  | LEU | A | 177 | 1932    | 1909   | 2205   | -460  | 146   | -40  | C |
| ATOM   | 982 | CG  | LEU | A | 177 | -4.789  | 5.618  | 11.650 | 1.00  | 16.54 |      | C |
| ANISOU | 982 | CG  | LEU | A | 177 | 2022    | 2012   | 2251   | -391  | 118   | -118 | C |
| ATOM   | 983 | CD1 | LEU | A | 177 | -4.533  | 6.171  | 10.250 | 1.00  | 19.59 |      | C |
| ANISOU | 983 | CD1 | LEU | A | 177 | 2342    | 2504   | 2599   | -395  | 117   | -153 | C |
| ATOM   | 984 | CD2 | LEU | A | 177 | -3.765  | 6.172  | 12.629 | 1.00  | 15.40 |      | C |
| ANISOU | 984 | CD2 | LEU | A | 177 | 1883    | 1876   | 2091   | -345  | 134   | -105 | C |
| ATOM   | 985 | C   | LEU | A | 177 | -7.976  | 6.385  | 13.813 | 1.00  | 17.43 |      | C |
| ANISOU | 985 | C   | LEU | A | 177 | 2124    | 2062   | 2436   | -519  | 216   | 93   | C |
| ATOM   | 986 | O   | LEU | A | 177 | -8.016  | 7.547  | 14.214 | 1.00  | 17.78 |      | O |
| ANISOU | 986 | O   | LEU | A | 177 | 2145    | 2149   | 2462   | -484  | 254   | 110  | O |
| ATOM   | 987 | N   | GLN | A | 178 | -9.074  | 5.669  | 13.593 | 1.00  | 17.71 |      | N |
| ANISOU | 987 | N   | GLN | A | 178 | 2152    | 2076   | 2503   | -583  | 201   | 131  | N |
| ATOM   | 988 | CA  | GLN | A | 178 | -10.387 | 6.182  | 13.992 | 1.00  | 20.95 |      | C |
| ANISOU | 988 | CA  | GLN | A | 178 | 2512    | 2533   | 2917   | -595  | 240   | 200  | C |
| ATOM   | 989 | CB  | GLN | A | 178 | -11.497 | 5.212  | 13.606 | 1.00  | 20.21 |      | C |
| ANISOU | 989 | CB  | GLN | A | 178 | 2401    | 2420   | 2856   | -680  | 203   | 249  | C |
| ATOM   | 990 | CG  | GLN | A | 178 | -11.789 | 5.153  | 12.122 | 1.00  | 23.01 |      | C |
| ANISOU | 990 | CG  | GLN | A | 178 | 2724    | 2794   | 3223   | -713  | 152   | 220  | C |
| ATOM   | 991 | CD  | GLN | A | 178 | -12.862 | 4.137  | 11.799 | 1.00  | 24.40 |      | C |
| ANISOU | 991 | CD  | GLN | A | 178 | 2896    | 2939   | 3436   | -813  | 98    | 274  | C |
| ATOM   | 992 | OE1 | GLN | A | 178 | -12.700 | 2.951  | 12.066 | 1.00  | 24.79 |      | O |
| ANISOU | 992 | OE1 | GLN | A | 178 | 3016    | 2897   | 3508   | -869  | 45    | 277  | O |
| ATOM   | 993 | NE2 | GLN | A | 178 | -13.968 | 4.601  | 11.224 | 1.00  | 29.11 |      | N |
| ANISOU | 993 | NE2 | GLN | A | 178 | 3415    | 3601   | 4045   | -842  | 96    | 324  | N |
| ATOM   | 994 | C   | GLN | A | 178 | -10.434 | 6.417  | 15.495 | 1.00  | 21.85 |      | C |
| ANISOU | 994 | C   | GLN | A | 178 | 2649    | 2642   | 3011   | -570  | 295   | 242  | C |
| ATOM   | 995 | O   | GLN | A | 178 | -11.001 | 7.405  | 15.962 | 1.00  | 23.65 |      | O |
| ANISOU | 995 | O   | GLN | A | 178 | 2837    | 2922   | 3227   | -535  | 348   | 268  | O |

|        |      |     |     |   |     |         |        |        |      |       |     |   |
|--------|------|-----|-----|---|-----|---------|--------|--------|------|-------|-----|---|
| ATOM   | 996  | N   | ALA | A | 179 | -9.853  | 5.492  | 16.251 | 1.00 | 19.45 |     | N |
| ANISOU | 996  | N   | ALA | A | 179 | 2417    | 2269   | 2704   | -591 | 279   | 250 | N |
| ATOM   | 997  | CA  | ALA | A | 179 | -9.789  | 5.632  | 17.701 | 1.00 | 21.66 |     | C |
| ANISOU | 997  | CA  | ALA | A | 179 | 2734    | 2545   | 2949   | -576 | 328   | 293 | C |
| ATOM   | 998  | CB  | ALA | A | 179 | -9.317  | 4.334  | 18.357 | 1.00 | 21.32 |     | C |
| ANISOU | 998  | CB  | ALA | A | 179 | 2777    | 2418   | 2904   | -603 | 273   | 309 | C |
| ATOM   | 999  | C   | ALA | A | 179 | -8.907  | 6.813  | 18.114 | 1.00 | 19.56 |     | C |
| ANISOU | 999  | C   | ALA | A | 179 | 2484    | 2301   | 2646   | -497 | 358   | 250 | C |
| ATOM   | 1000 | O   | ALA | A | 179 | -9.279  | 7.581  | 18.998 | 1.00 | 21.13 |     | O |
| ANISOU | 1000 | O   | ALA | A | 179 | 2680    | 2536   | 2810   | -469 | 418   | 277 | O |
| ATOM   | 1001 | N   | TYR | A | 180 | -7.743  | 6.966  | 17.482 | 1.00 | 16.50 |     | N |
| ANISOU | 1001 | N   | TYR | A | 180 | 2113    | 1897   | 2259   | -461 | 312   | 184 | N |
| ATOM   | 1002 | CA  | TYR | A | 180 | -6.935  | 8.164  | 17.711 | 1.00 | 15.92 |     | C |
| ANISOU | 1002 | CA  | TYR | A | 180 | 2045    | 1848   | 2155   | -407 | 322   | 155 | C |
| ATOM   | 1003 | CB  | TYR | A | 180 | -5.740  | 8.224  | 16.758 | 1.00 | 15.67 |     | C |
| ANISOU | 1003 | CB  | TYR | A | 180 | 2000    | 1826   | 2127   | -386 | 269   | 98  | C |
| ATOM   | 1004 | CG  | TYR | A | 180 | -4.453  | 7.608  | 17.246 | 1.00 | 16.30 |     | C |
| ANISOU | 1004 | CG  | TYR | A | 180 | 2133    | 1869   | 2191   | -351 | 226   | 70  | C |
| ATOM   | 1005 | CD1 | TYR | A | 180 | -3.631  | 8.284  | 18.142 | 1.00 | 16.67 |     | C |
| ANISOU | 1005 | CD1 | TYR | A | 180 | 2216    | 1913   | 2205   | -321 | 221   | 75  | C |
| ATOM   | 1006 | CE1 | TYR | A | 180 | -2.441  | 7.737  | 18.567 | 1.00 | 17.35 |     | C |
| ANISOU | 1006 | CE1 | TYR | A | 180 | 2338    | 1972   | 2281   | -289 | 174   | 56  | C |
| ATOM   | 1007 | CZ  | TYR | A | 180 | -2.046  | 6.501  | 18.090 | 1.00 | 17.90 |     | C |
| ANISOU | 1007 | CZ  | TYR | A | 180 | 2411    | 2014   | 2376   | -272 | 134   | 23  | C |
| ATOM   | 1008 | OH  | TYR | A | 180 | -0.857  | 5.957  | 18.515 | 1.00 | 20.26 |     | O |
| ANISOU | 1008 | OH  | TYR | A | 180 | 2738    | 2288   | 2672   | -225 | 83    | 5   | O |
| ATOM   | 1009 | CE2 | TYR | A | 180 | -2.836  | 5.809  | 17.192 | 1.00 | 17.31 |     | C |
| ANISOU | 1009 | CE2 | TYR | A | 180 | 2316    | 1931   | 2330   | -296 | 135   | 6   | C |
| ATOM   | 1010 | CD2 | TYR | A | 180 | -4.030  | 6.372  | 16.767 | 1.00 | 16.93 |     | C |
| ANISOU | 1010 | CD2 | TYR | A | 180 | 2228    | 1915   | 2290   | -343 | 180   | 34  | C |
| ATOM   | 1011 | C   | TYR | A | 180 | -7.753  | 9.432  | 17.498 | 1.00 | 17.59 |     | C |
| ANISOU | 1011 | C   | TYR | A | 180 | 2203    | 2111   | 2370   | -395 | 365   | 171 | C |
| ATOM   | 1012 | O   | TYR | A | 180 | -7.712  | 10.354 | 18.314 | 1.00 | 15.98 |     | O |
| ANISOU | 1012 | O   | TYR | A | 180 | 2026    | 1911   | 2136   | -356 | 394   | 176 | O |
| ATOM   | 1013 | N   | CYS | A | 181 | -8.471  | 9.502  | 16.381 | 1.00 | 14.46 |     | N |
| ANISOU | 1013 | N   | CYS | A | 181 | 1743    | 1749   | 2003   | -409 | 349   | 167 | N |
| ATOM   | 1014 | CA  | CYS | A | 181 | -9.199  | 10.730 | 16.057 | 1.00 | 20.62 |     | C |
| ANISOU | 1014 | CA  | CYS | A | 181 | 2473    | 2568   | 2794   | -384 | 367   | 179 | C |
| ATOM   | 1015 | CB  | CYS | A | 181 | -9.717  | 10.706 | 14.613 | 1.00 | 21.66 |     | C |
| ANISOU | 1015 | CB  | CYS | A | 181 | 2545    | 2732   | 2951   | -408 | 326   | 174 | C |
| ATOM   | 1016 | SG  | CYS | A | 181 | -8.400  | 10.835 | 13.394 | 1.00 | 20.96 |     | S |
| ANISOU | 1016 | SG  | CYS | A | 181 | 2462    | 2661   | 2841   | -412 | 262   | 122 | S |
| ATOM   | 1017 | C   | CYS | A | 181 | -10.342 | 10.971 | 17.024 | 1.00 | 21.57 |     | C |
| ANISOU | 1017 | C   | CYS | A | 181 | 2574    | 2708   | 2912   | -372 | 441   | 228 | C |
| ATOM   | 1018 | O   | CYS | A | 181 | -10.584 | 12.105 | 17.442 | 1.00 | 21.22 |     | O |
| ANISOU | 1018 | O   | CYS | A | 181 | 2523    | 2679   | 2860   | -331 | 483   | 234 | O |
| ATOM   | 1019 | N   | PHE | A | 182 | -11.037 | 9.898  | 17.386 | 1.00 | 18.83 |     | N |
| ANISOU | 1019 | N   | PHE | A | 182 | 2216    | 2368   | 2570   | -413 | 461   | 269 | N |
| ATOM   | 1020 | CA  | PHE | A | 182 | -12.152 | 9.995  | 18.322 | 1.00 | 21.46 |     | C |
| ANISOU | 1020 | CA  | PHE | A | 182 | 2513    | 2752   | 2889   | -409 | 542   | 329 | C |
| ATOM   | 1021 | CB  | PHE | A | 182 | -12.837 | 8.634  | 18.469 | 1.00 | 22.27 |     | C |
| ANISOU | 1021 | CB  | PHE | A | 182 | 2597    | 2862   | 3003   | -486 | 535   | 390 | C |
| ATOM   | 1022 | CG  | PHE | A | 182 | -14.058 | 8.664  | 19.346 | 1.00 | 29.33 |     | C |
| ANISOU | 1022 | CG  | PHE | A | 182 | 3427    | 3840   | 3876   | -494 | 621   | 470 | C |
| ATOM   | 1023 | CD1 | PHE | A | 182 | -15.318 | 8.843  | 18.794 | 1.00 | 35.45 |     | C |
| ANISOU | 1023 | CD1 | PHE | A | 182 | 4089    | 4687   | 4691   | -511 | 639   | 519 | C |
| ATOM   | 1024 | CE1 | PHE | A | 182 | -16.444 | 8.876  | 19.597 | 1.00 | 38.49 |     | C |
| ANISOU | 1024 | CE1 | PHE | A | 182 | 4394    | 5178   | 5054   | -513 | 729   | 600 | C |
| ATOM   | 1025 | CZ  | PHE | A | 182 | -16.317 | 8.733  | 20.967 | 1.00 | 41.09 |     | C |
| ANISOU | 1025 | CZ  | PHE | A | 182 | 4764    | 5544   | 5306   | -499 | 806   | 626 | C |
| ATOM   | 1026 | CE2 | PHE | A | 182 | -15.065 | 8.557  | 21.529 | 1.00 | 36.89 |     | C |
| ANISOU | 1026 | CE2 | PHE | A | 182 | 4360    | 4927   | 4728   | -487 | 781   | 576 | C |
| ATOM   | 1027 | CD2 | PHE | A | 182 | -13.944 | 8.526  | 20.717 | 1.00 | 31.41 |     | C |
| ANISOU | 1027 | CD2 | PHE | A | 182 | 3737    | 4126   | 4071   | -484 | 688   | 500 | C |
| ATOM   | 1028 | C   | PHE | A | 182 | -11.672 | 10.497 | 19.682 | 1.00 | 23.81 |     | C |
| ANISOU | 1028 | C   | PHE | A | 182 | 2881    | 3046   | 3121   | -355 | 598   | 321 | C |
| ATOM   | 1029 | O   | PHE | A | 182 | -12.254 | 11.413 | 20.266 | 1.00 | 22.99 |     | O |
| ANISOU | 1029 | O   | PHE | A | 182 | 2761    | 2986   | 2989   | -287 | 657   | 320 | O |
| ATOM   | 1030 | N   | ILE | A | 183 | -10.609 | 9.887  | 20.188 | 1.00 | 16.96 |     | N |
| ANISOU | 1030 | N   | ILE | A | 183 | 2101    | 2122   | 2223   | -367 | 560   | 301 | N |



|        |      |     |     |   |     |         |        |        |      |       |     |   |
|--------|------|-----|-----|---|-----|---------|--------|--------|------|-------|-----|---|
| ATOM   | 1031 | CA  | ILE | A | 183 | -10.021 | 10.316 | 21.453 | 1.00 | 18.27 | C   |   |
| ANISOU | 1031 | CA  | ILE | A | 183 | 2352    | 2273   | 2317   | -313 | 581   | 282 | C |
| ATOM   | 1032 | CB  | ILE | A | 183 | -8.848  | 9.412  | 21.842 | 1.00 | 20.73 | C   |   |
| ANISOU | 1032 | CB  | ILE | A | 183 | 2746    | 2518   | 2611   | -341 | 521   | 274 | C |
| ATOM   | 1033 | CG1 | ILE | A | 183 | -9.361  | 8.007  | 22.163 | 1.00 | 20.45 | C   |   |
| ANISOU | 1033 | CG1 | ILE | A | 183 | 2710    | 2478   | 2581   | -414 | 523   | 339 | C |
| ATOM   | 1034 | CD1 | ILE | A | 183 | -8.264  | 6.986  | 22.254 | 1.00 | 23.32 | C   |   |
| ANISOU | 1034 | CD1 | ILE | A | 183 | 3145    | 2761   | 2953   | -438 | 443   | 328 | C |
| ATOM   | 1035 | CG2 | ILE | A | 183 | -8.112  | 9.979  | 23.027 | 1.00 | 19.96 | C   |   |
| ANISOU | 1035 | CG2 | ILE | A | 183 | 2741    | 2401   | 2440   | -291 | 523   | 251 | C |
| ATOM   | 1036 | C   | ILE | A | 183 | -9.548  | 11.770 | 21.409 | 1.00 | 20.83 | C   |   |
| ANISOU | 1036 | C   | ILE | A | 183 | 2705    | 2583   | 2628   | -239 | 568   | 225 | C |
| ATOM   | 1037 | O   | ILE | A | 183 | -9.899  | 12.572 | 22.276 | 1.00 | 22.60 | O   |   |
| ANISOU | 1037 | O   | ILE | A | 183 | 2961    | 2826   | 2800   | -172 | 614   | 212 | O |
| ATOM   | 1038 | N   | LEU | A | 184 | -8.763  | 12.114 | 20.391 | 1.00 | 20.68 | N   |   |
| ANISOU | 1038 | N   | LEU | A | 184 | 2676    | 2531   | 2649   | -251 | 499   | 192 | N |
| ATOM   | 1039 | CA  | LEU | A | 184 | -8.228  | 13.473 | 20.283 | 1.00 | 21.14 | C   |   |
| ANISOU | 1039 | CA  | LEU | A | 184 | 2766    | 2565   | 2700   | -204 | 462   | 154 | C |
| ATOM   | 1040 | CB  | LEU | A | 184 | -7.294  | 13.604 | 19.072 | 1.00 | 18.25 | C   |   |
| ANISOU | 1040 | CB  | LEU | A | 184 | 2374    | 2187   | 2374   | -245 | 386   | 139 | C |
| ATOM   | 1041 | CG  | LEU | A | 184 | -5.942  | 12.926 | 19.314 | 1.00 | 19.85 | C   |   |
| ANISOU | 1041 | CG  | LEU | A | 184 | 2623    | 2363   | 2555   | -266 | 338   | 125 | C |
| ATOM   | 1042 | CD1 | LEU | A | 184 | -5.164  | 12.751 | 18.015 | 1.00 | 19.07 | C   |   |
| ANISOU | 1042 | CD1 | LEU | A | 184 | 2469    | 2290   | 2489   | -304 | 284   | 114 | C |
| ATOM   | 1043 | CD2 | LEU | A | 184 | -5.120  | 13.684 | 20.356 | 1.00 | 23.14 | C   |   |
| ANISOU | 1043 | CD2 | LEU | A | 184 | 3131    | 2740   | 2921   | -233 | 305   | 110 | C |
| ATOM   | 1044 | C   | LEU | A | 184 | -9.314  | 14.544 | 20.244 | 1.00 | 23.79 | C   |   |
| ANISOU | 1044 | C   | LEU | A | 184 | 3066    | 2925   | 3047   | -145 | 502   | 152 | C |
| ATOM   | 1045 | O   | LEU | A | 184 | -9.160  | 15.604 | 20.848 | 1.00 | 23.07 | O   |   |
| ANISOU | 1045 | O   | LEU | A | 184 | 3040    | 2803   | 2922   | -78  | 492   | 119 | O |
| ATOM   | 1046 | N   | GLU | A | 185 | -10.411 | 14.268 | 19.545 | 1.00 | 23.67 | N   |   |
| ANISOU | 1046 | N   | GLU | A | 185 | 2953    | 2962   | 3080   | -164 | 538   | 186 | N |
| ATOM   | 1047 | CA  | GLU | A | 185 | -11.534 | 15.202 | 19.511 | 1.00 | 29.70 | C   |   |
| ANISOU | 1047 | CA  | GLU | A | 185 | 3664    | 3759   | 3861   | -96  | 578   | 190 | C |
| ATOM   | 1048 | CB  | GLU | A | 185 | -12.670 | 14.659 | 18.646 | 1.00 | 35.19 | C   |   |
| ANISOU | 1048 | CB  | GLU | A | 185 | 4236    | 4520   | 4617   | -143 | 605   | 244 | C |
| ATOM   | 1049 | CG  | GLU | A | 185 | -12.405 | 14.745 | 17.164 | 1.00 | 44.54 | C   |   |
| ANISOU | 1049 | CG  | GLU | A | 185 | 5375    | 5688   | 5861   | -204 | 530   | 248 | C |
| ATOM   | 1050 | CD  | GLU | A | 185 | -12.353 | 16.176 | 16.668 | 1.00 | 46.00 | C   |   |
| ANISOU | 1050 | CD  | GLU | A | 185 | 5563    | 5842   | 6072   | -153 | 480   | 228 | C |
| ATOM   | 1051 | OE1 | GLU | A | 185 | -13.187 | 16.997 | 17.112 | 1.00 | 47.15 | O   |   |
| ANISOU | 1051 | OE1 | GLU | A | 185 | 5692    | 6000   | 6224   | -65  | 515   | 225 | O |
| ATOM   | 1052 | OE2 | GLU | A | 185 | -11.481 | 16.473 | 15.827 | 1.00 | 40.23 | O   |   |
| ANISOU | 1052 | OE2 | GLU | A | 185 | 4852    | 5080   | 5354   | -198 | 403   | 219 | O |
| ATOM   | 1053 | C   | GLU | A | 185 | -12.059 | 15.486 | 20.912 | 1.00 | 29.44 | C   |   |
| ANISOU | 1053 | C   | GLU | A | 185 | 3672    | 3754   | 3758   | -10  | 656   | 176 | C |
| ATOM   | 1054 | O   | GLU | A | 185 | -12.366 | 16.629 | 21.245 | 1.00 | 30.09 | O   |   |
| ANISOU | 1054 | O   | GLU | A | 185 | 3782    | 3825   | 3826   | 87   | 664   | 138 | O |
| ATOM   | 1055 | N   | LYS | A | 186 | -12.170 | 14.440 | 21.723 | 1.00 | 27.83 | N   |   |
| ANISOU | 1055 | N   | LYS | A | 186 | 3513    | 3412   | 3650   | 142  | 407   | -94 | N |
| ATOM   | 1056 | CA  | LYS | A | 186 | -12.619 | 14.586 | 23.104 | 1.00 | 26.63 | C   |   |
| ANISOU | 1056 | CA  | LYS | A | 186 | 3394    | 3256   | 3468   | 172  | 446   | -89 | C |
| ATOM   | 1057 | CB  | LYS | A | 186 | -12.926 | 13.219 | 23.729 | 1.00 | 32.97 | C   |   |
| ANISOU | 1057 | CB  | LYS | A | 186 | 4183    | 4061   | 4282   | 151  | 498   | -71 | C |
| ATOM   | 1058 | CG  | LYS | A | 186 | -14.172 | 12.540 | 23.185 | 1.00 | 45.42 | C   |   |
| ANISOU | 1058 | CG  | LYS | A | 186 | 5688    | 5664   | 5905   | 133  | 533   | -72 | C |
| ATOM   | 1059 | CD  | LYS | A | 186 | -15.442 | 13.201 | 23.701 | 1.00 | 57.15 | C   |   |
| ANISOU | 1059 | CD  | LYS | A | 186 | 7153    | 7177   | 7384   | 170  | 573   | -76 | C |
| ATOM   | 1060 | CE  | LYS | A | 186 | -16.685 | 12.403 | 23.314 | 1.00 | 60.38 | C   |   |
| ANISOU | 1060 | CE  | LYS | A | 186 | 7484    | 7611   | 7846   | 147  | 613   | -71 | C |
| ATOM   | 1061 | NZ  | LYS | A | 186 | -16.980 | 12.474 | 21.854 | 1.00 | 56.93 | N   |   |
| ANISOU | 1061 | NZ  | LYS | A | 186 | 6996    | 7181   | 7455   | 130  | 573   | -94 | N |
| ATOM   | 1062 | C   | LYS | A | 186 | -11.583 | 15.313 | 23.951 | 1.00 | 24.94 | C   |   |
| ANISOU | 1062 | C   | LYS | A | 186 | 3254    | 3013   | 3210   | 194  | 414   | -85 | C |
| ATOM   | 1063 | O   | LYS | A | 186 | -11.920 | 16.232 | 24.694 | 1.00 | 21.56 | O   |   |
| ANISOU | 1063 | O   | LYS | A | 186 | 2861    | 2581   | 2751   | 237  | 414   | -93 | O |
| ATOM   | 1064 | N   | LEU | A | 187 | -10.324 | 14.897 | 23.848 | 1.00 | 21.15 | N   |   |
| ANISOU | 1064 | N   | LEU | A | 187 | 2795    | 2513   | 2727   | 168  | 384   | -75 | N |
| ATOM   | 1065 | CA  | LEU | A | 187 | -9.258  | 15.497 | 24.650 | 1.00 | 21.37 | C   |   |
| ANISOU | 1065 | CA  | LEU | A | 187 | 2890    | 2509   | 2720   | 183  | 346   | -70 | C |

|        |      |     |     |   |     |         |        |        |      |       |      |   |
|--------|------|-----|-----|---|-----|---------|--------|--------|------|-------|------|---|
| ATOM   | 1066 | CB  | LEU | A | 187 | -7.913  | 14.814 | 24.376 | 1.00 | 28.30 | C    |   |
| ANISOU | 1066 | CB  | LEU | A | 187 | 3774    | 3373   | 3607   | 149  | 318   | -58  | C |
| ATOM   | 1067 | CG  | LEU | A | 187 | -7.727  | 13.333 | 24.716 | 1.00 | 32.72 | C    |   |
| ANISOU | 1067 | CG  | LEU | A | 187 | 4328    | 3932   | 4172   | 127  | 351   | -47  | C |
| ATOM   | 1068 | CD1 | LEU | A | 187 | -6.392  | 12.852 | 24.166 | 1.00 | 31.21 | C    |   |
| ANISOU | 1068 | CD1 | LEU | A | 187 | 4134    | 3733   | 3991   | 100  | 313   | -41  | C |
| ATOM   | 1069 | CD2 | LEU | A | 187 | -7.805  | 13.089 | 26.212 | 1.00 | 29.98 | C    |   |
| ANISOU | 1069 | CD2 | LEU | A | 187 | 4036    | 3567   | 3787   | 152  | 379   | -40  | C |
| ATOM   | 1070 | C   | LEU | A | 187 | -9.121  | 16.986 | 24.356 | 1.00 | 24.24 | C    |   |
| ANISOU | 1070 | C   | LEU | A | 187 | 3273    | 2861   | 3075   | 205  | 295   | -80  | C |
| ATOM   | 1071 | O   | LEU | A | 187 | -8.787  | 17.773 | 25.241 | 1.00 | 20.14 | O    |   |
| ANISOU | 1071 | O   | LEU | A | 187 | 2813    | 2315   | 2524   | 236  | 269   | -84  | O |
| ATOM   | 1072 | N   | LEU | A | 188 | -9.376  | 17.369 | 23.110 | 1.00 | 17.28 | N    |   |
| ANISOU | 1072 | N   | LEU | A | 188 | 2348    | 1996   | 2222   | 190  | 276   | -84  | N |
| ATOM   | 1073 | CA  | LEU | A | 188 | -9.158  | 18.757 | 22.694 | 1.00 | 18.73 | C    |   |
| ANISOU | 1073 | CA  | LEU | A | 188 | 2551    | 2164   | 2402   | 203  | 221   | -88  | C |
| ATOM   | 1074 | CB  | LEU | A | 188 | -8.930  | 18.841 | 21.188 | 1.00 | 21.14 | C    |   |
| ANISOU | 1074 | CB  | LEU | A | 188 | 2809    | 2486   | 2738   | 171  | 197   | -80  | C |
| ATOM   | 1075 | CG  | LEU | A | 188 | -7.546  | 18.352 | 20.750 | 1.00 | 21.20 | C    |   |
| ANISOU | 1075 | CG  | LEU | A | 188 | 2812    | 2490   | 2753   | 133  | 172   | -58  | C |
| ATOM   | 1076 | CD1 | LEU | A | 188 | -7.493  | 18.145 | 19.237 | 1.00 | 21.99 | C    |   |
| ANISOU | 1076 | CD1 | LEU | A | 188 | 2858    | 2620   | 2876   | 108  | 166   | -52  | C |
| ATOM   | 1077 | CD2 | LEU | A | 188 | -6.487  | 19.349 | 21.197 | 1.00 | 20.22 | C    |   |
| ANISOU | 1077 | CD2 | LEU | A | 188 | 2737    | 2331   | 2616   | 132  | 115   | -43  | C |
| ATOM   | 1078 | C   | LEU | A | 188 | -10.273 | 19.696 | 23.141 | 1.00 | 22.26 | C    |   |
| ANISOU | 1078 | C   | LEU | A | 188 | 3015    | 2611   | 2832   | 252  | 227   | -108 | C |
| ATOM   | 1079 | O   | LEU | A | 188 | -10.251 | 20.890 | 22.836 | 1.00 | 23.56 | O    |   |
| ANISOU | 1079 | O   | LEU | A | 188 | 3199    | 2759   | 2994   | 269  | 179   | -114 | O |
| ATOM   | 1080 | N   | GLU | A | 189 | -11.242 | 19.153 | 23.872 | 1.00 | 22.63 | N    |   |
| ANISOU | 1080 | N   | GLU | A | 189 | 3052    | 2678   | 2868   | 277  | 286   | -117 | N |
| ATOM   | 1081 | CA  | GLU | A | 189 | -12.234 | 19.980 | 24.547 | 1.00 | 20.60 | C    |   |
| ANISOU | 1081 | CA  | GLU | A | 189 | 2816    | 2427   | 2585   | 335  | 298   | -137 | C |
| ATOM   | 1082 | CB  | GLU | A | 189 | -13.391 | 19.120 | 25.072 | 1.00 | 26.97 | C    |   |
| ANISOU | 1082 | CB  | GLU | A | 189 | 3584    | 3271   | 3391   | 349  | 378   | -138 | C |
| ATOM   | 1083 | CG  | GLU | A | 189 | -14.343 | 18.621 | 24.006 | 1.00 | 35.24 | C    |   |
| ANISOU | 1083 | CG  | GLU | A | 189 | 4551    | 4354   | 4486   | 325  | 406   | -141 | C |
| ATOM   | 1084 | CD  | GLU | A | 189 | -15.349 | 17.620 | 24.549 | 1.00 | 43.75 | C    |   |
| ANISOU | 1084 | CD  | GLU | A | 189 | 5585    | 5465   | 5572   | 326  | 482   | -133 | C |
| ATOM   | 1085 | OE1 | GLU | A | 189 | -15.571 | 17.605 | 25.780 | 1.00 | 39.59 | O    |   |
| ANISOU | 1085 | OE1 | GLU | A | 189 | 5092    | 4943   | 5007   | 361  | 520   | -127 | O |
| ATOM   | 1086 | OE2 | GLU | A | 189 | -15.912 | 16.845 | 23.745 | 1.00 | 47.85 | O    |   |
| ANISOU | 1086 | OE2 | GLU | A | 189 | 6038    | 6006   | 6138   | 291  | 504   | -129 | O |
| ATOM   | 1087 | C   | GLU | A | 189 | -11.576 | 20.706 | 25.722 | 1.00 | 22.18 | C    |   |
| ANISOU | 1087 | C   | GLU | A | 189 | 3099    | 2589   | 2740   | 373  | 263   | -141 | C |
| ATOM   | 1088 | O   | GLU | A | 189 | -12.055 | 21.746 | 26.171 | 1.00 | 24.57 | O    |   |
| ANISOU | 1088 | O   | GLU | A | 189 | 3437    | 2882   | 3016   | 426  | 242   | -162 | O |
| ATOM   | 1089 | N   | ASN | A | 190 | -10.480 | 20.143 | 26.216 | 1.00 | 18.82 | N    |   |
| ANISOU | 1089 | N   | ASN | A | 190 | 2706    | 2141   | 2305   | 349  | 252   | -125 | N |
| ATOM   | 1090 | CA  | ASN | A | 190 | -9.779  | 20.687 | 27.372 | 1.00 | 19.72 | C    |   |
| ANISOU | 1090 | CA  | ASN | A | 190 | 2900    | 2216   | 2377   | 383  | 215   | -130 | C |
| ATOM   | 1091 | CB  | ASN | A | 190 | -9.018  | 19.570 | 28.094 | 1.00 | 19.41 | C    |   |
| ANISOU | 1091 | CB  | ASN | A | 190 | 2880    | 2169   | 2325   | 363  | 238   | -113 | C |
| ATOM   | 1092 | CG  | ASN | A | 190 | -8.184  | 20.079 | 29.253 | 1.00 | 24.48 | C    |   |
| ANISOU | 1092 | CG  | ASN | A | 190 | 3608    | 2768   | 2926   | 397  | 192   | -119 | C |
| ATOM   | 1093 | OD1 | ASN | A | 190 | -7.077  | 20.577 | 29.064 | 1.00 | 21.23 | O    |   |
| ANISOU | 1093 | OD1 | ASN | A | 190 | 3221    | 2319   | 2527   | 376  | 121   | -114 | O |
| ATOM   | 1094 | ND2 | ASN | A | 190 | -8.701  | 19.926 | 30.469 | 1.00 | 27.03 | N    |   |
| ANISOU | 1094 | ND2 | ASN | A | 190 | 3975    | 3095   | 3199   | 450  | 230   | -127 | N |
| ATOM   | 1095 | C   | ASN | A | 190 | -8.845  | 21.830 | 26.971 | 1.00 | 23.96 | C    |   |
| ANISOU | 1095 | C   | ASN | A | 190 | 3471    | 2709   | 2924   | 374  | 125   | -130 | C |
| ATOM   | 1096 | O   | ASN | A | 190 | -8.045  | 21.695 | 26.047 | 1.00 | 20.92 | O    |   |
| ANISOU | 1096 | O   | ASN | A | 190 | 3056    | 2320   | 2574   | 321  | 95    | -111 | O |
| ATOM   | 1097 | N   | GLU | A | 191 | -8.946  | 22.950 | 27.677 | 1.00 | 22.28 | N    |   |
| ANISOU | 1097 | N   | GLU | A | 191 | 3321    | 2464   | 2679   | 427  | 80    | -150 | N |
| ATOM   | 1098 | CA  | GLU | A | 191 | -8.235  | 24.161 | 27.282 | 1.00 | 22.52 | C    |   |
| ANISOU | 1098 | CA  | GLU | A | 191 | 3384    | 2449   | 2725   | 420  | -11   | -149 | C |
| ATOM   | 1099 | CB  | GLU | A | 191 | -8.852  | 25.393 | 27.965 | 1.00 | 23.77 | C    |   |
| ANISOU | 1099 | CB  | GLU | A | 191 | 3605    | 2580   | 2848   | 493  | -51   | -181 | C |
| ATOM   | 1100 | CG  | GLU | A | 191 | -10.211 | 25.750 | 27.361 | 1.00 | 27.27 | C    |   |
| ANISOU | 1100 | CG  | GLU | A | 191 | 4007    | 3060   | 3296   | 522  | -17   | -199 | C |

|        |      |     |     |   |     |         |        |        |      |       |      |   |
|--------|------|-----|-----|---|-----|---------|--------|--------|------|-------|------|---|
| ATOM   | 1101 | CD  | GLU | A | 191 | -10.798 | 27.053 | 27.873 | 1.00 | 30.84 | C    |   |
| ANISOU | 1101 | CD  | GLU | A | 191 | 4518    | 3485   | 3716   | 598  | -66   | -233 | C |
| ATOM   | 1102 | OE1 | GLU | A | 191 | -10.160 | 27.717 | 28.712 | 1.00 | 26.00 | O    |   |
| ANISOU | 1102 | OE1 | GLU | A | 191 | 3983    | 2820   | 3076   | 630  | -130  | -244 | O |
| ATOM   | 1103 | OE2 | GLU | A | 191 | -11.906 | 27.408 | 27.422 | 1.00 | 30.23 | O    |   |
| ANISOU | 1103 | OE2 | GLU | A | 191 | 4409    | 3436   | 3641   | 629  | -44   | -251 | O |
| ATOM   | 1104 | C   | GLU | A | 191 | -6.720  | 24.092 | 27.469 | 1.00 | 19.78 | C    |   |
| ANISOU | 1104 | C   | GLU | A | 191 | 3066    | 2061   | 2390   | 380  | -68   | -128 | C |
| ATOM   | 1105 | O   | GLU | A | 191 | -5.969  | 24.694 | 26.699 | 1.00 | 25.43 | O    |   |
| ANISOU | 1105 | O   | GLU | A | 191 | 3771    | 2752   | 3139   | 340  | -129  | -109 | O |
| ATOM   | 1106 | N   | GLU | A | 192 | -6.258  | 23.358 | 28.478 | 1.00 | 16.29 | N    |   |
| ANISOU | 1106 | N   | GLU | A | 192 | 2657    | 1613   | 1922   | 390  | -49   | -128 | N |
| ATOM   | 1107 | CA  | GLU | A | 192 | -4.821  | 23.209 | 28.643 | 1.00 | 15.00 | C    |   |
| ANISOU | 1107 | CA  | GLU | A | 192 | 2513    | 1415   | 1773   | 353  | -102  | -109 | C |
| ATOM   | 1108 | CB  | GLU | A | 192 | -4.465  | 22.611 | 30.007 | 1.00 | 19.41 | C    |   |
| ANISOU | 1108 | CB  | GLU | A | 192 | 3129    | 1956   | 2289   | 385  | -91   | -118 | C |
| ATOM   | 1109 | CG  | GLU | A | 192 | -4.228  | 23.619 | 31.094 | 1.00 | 32.90 | C    |   |
| ANISOU | 1109 | CG  | GLU | A | 192 | 4928    | 3611   | 3961   | 442  | -160  | -141 | C |
| ATOM   | 1110 | CD  | GLU | A | 192 | -3.729  | 22.960 | 32.365 | 1.00 | 36.44 | C    |   |
| ANISOU | 1110 | CD  | GLU | A | 192 | 5435    | 4044   | 4368   | 471  | -153  | -147 | C |
| ATOM   | 1111 | OE1 | GLU | A | 192 | -4.485  | 22.159 | 32.949 | 1.00 | 34.02 | O    |   |
| ANISOU | 1111 | OE1 | GLU | A | 192 | 5130    | 3773   | 4022   | 502  | -74   | -152 | O |
| ATOM   | 1112 | OE2 | GLU | A | 192 | -2.580  | 23.235 | 32.769 | 1.00 | 34.70 | O    |   |
| ANISOU | 1112 | OE2 | GLU | A | 192 | 5255    | 3775   | 4155   | 461  | -228  | -145 | O |
| ATOM   | 1113 | C   | GLU | A | 192 | -4.248  | 22.344 | 27.527 | 1.00 | 17.79 | C    |   |
| ANISOU | 1113 | C   | GLU | A | 192 | 2791    | 1798   | 2170   | 283  | -79   | -79  | C |
| ATOM   | 1114 | O   | GLU | A | 192 | -3.185  | 22.638 | 26.995 | 1.00 | 16.58 | O    |   |
| ANISOU | 1114 | O   | GLU | A | 192 | 2625    | 1626   | 2047   | 241  | -133  | -57  | O |
| ATOM   | 1115 | N   | THR | A | 193 | -4.955  | 21.271 | 27.182 | 1.00 | 20.59 | N    |   |
| ANISOU | 1115 | N   | THR | A | 193 | 3096    | 2202   | 2527   | 274  | 0     | -79  | N |
| ATOM   | 1116 | CA  | THR | A | 193 | -4.510  | 20.383 | 26.107 | 1.00 | 22.19 | C    |   |
| ANISOU | 1116 | CA  | THR | A | 193 | 3231    | 2436   | 2766   | 218  | 23    | -57  | C |
| ATOM   | 1117 | CB  | THR | A | 193 | -5.366  | 19.108 | 26.051 | 1.00 | 19.64 | C    |   |
| ANISOU | 1117 | CB  | THR | A | 193 | 2867    | 2154   | 2440   | 217  | 105   | -62  | C |
| ATOM   | 1118 | OG1 | THR | A | 193 | -5.269  | 18.436 | 27.312 | 1.00 | 22.06 | O    |   |
| ANISOU | 1118 | OG1 | THR | A | 193 | 3219    | 2449   | 2713   | 240  | 131   | -66  | O |
| ATOM   | 1119 | CG2 | THR | A | 193 | -4.882  | 18.179 | 24.951 | 1.00 | 15.60 | C    |   |
| ANISOU | 1119 | CG2 | THR | A | 193 | 2293    | 1671   | 1962   | 167  | 120   | -45  | C |
| ATOM   | 1120 | C   | THR | A | 193 | -4.493  | 21.103 | 24.752 | 1.00 | 20.46 | C    |   |
| ANISOU | 1120 | C   | THR | A | 193 | 2966    | 2227   | 2580   | 189  | -7    | -44  | C |
| ATOM   | 1121 | O   | THR | A | 193 | -3.613  | 20.858 | 23.918 | 1.00 | 15.83 | O    |   |
| ANISOU | 1121 | O   | THR | A | 193 | 2343    | 1652   | 2021   | 144  | -24   | -20  | O |
| ATOM   | 1122 | N   | GLN | A | 194 | -5.440  | 22.015 | 24.548 | 1.00 | 17.30 | N    |   |
| ANISOU | 1122 | N   | GLN | A | 194 | 2572    | 1825   | 2175   | 217  | -14   | -59  | N |
| ATOM   | 1123 | CA  | GLN | A | 194 | -5.453  | 22.852 | 23.343 | 1.00 | 19.45 | C    |   |
| ANISOU | 1123 | CA  | GLN | A | 194 | 2815    | 2100   | 2474   | 195  | -50   | -46  | C |
| ATOM   | 1124 | CB  | GLN | A | 194 | -6.603  | 23.866 | 23.386 | 1.00 | 18.55 | C    |   |
| ANISOU | 1124 | CB  | GLN | A | 194 | 2722    | 1978   | 2349   | 240  | -61   | -70  | C |
| ATOM   | 1125 | CG  | GLN | A | 194 | -7.968  | 23.280 | 23.130 | 1.00 | 21.16 | C    |   |
| ANISOU | 1125 | CG  | GLN | A | 194 | 3011    | 2354   | 2676   | 262  | 10    | -91  | C |
| ATOM   | 1126 | CD  | GLN | A | 194 | -9.075  | 24.276 | 23.402 | 1.00 | 24.15 | C    |   |
| ANISOU | 1126 | CD  | GLN | A | 194 | 3415    | 2725   | 3037   | 318  | -1    | -119 | C |
| ATOM   | 1127 | OE1 | GLN | A | 194 | -8.820  | 25.466 | 23.576 | 1.00 | 23.83 | O    |   |
| ANISOU | 1127 | OE1 | GLN | A | 194 | 3423    | 2642   | 2990   | 338  | -68   | -122 | O |
| ATOM   | 1128 | NE2 | GLN | A | 194 | -10.313 | 23.792 | 23.450 | 1.00 | 22.08 | N    |   |
| ANISOU | 1128 | NE2 | GLN | A | 194 | 3118    | 2502   | 2769   | 346  | 62    | -139 | N |
| ATOM   | 1129 | C   | GLN | A | 194 | -4.137  | 23.600 | 23.141 | 1.00 | 18.82 | C    |   |
| ANISOU | 1129 | C   | GLN | A | 194 | 2754    | 1984   | 2414   | 161  | -126  | -17  | C |
| ATOM   | 1130 | O   | GLN | A | 194 | -3.792  | 23.977 | 22.016 | 1.00 | 18.90 | O    |   |
| ANISOU | 1130 | O   | GLN | A | 194 | 2727    | 2005   | 2450   | 125  | -149  | 10   | O |
| ATOM   | 1131 | N   | ILE | A | 195 | -3.406  | 23.832 | 24.227 | 1.00 | 15.76 | N    |   |
| ANISOU | 1131 | N   | ILE | A | 195 | 2421    | 1553   | 2013   | 173  | -167  | -19  | N |
| ATOM   | 1132 | CA  | ILE | A | 195 | -2.116  | 24.506 | 24.134 | 1.00 | 14.24 | C    |   |
| ANISOU | 1132 | CA  | ILE | A | 195 | 2242    | 1323   | 1846   | 137  | -244  | 11   | C |
| ATOM   | 1133 | CB  | ILE | A | 195 | -1.952  | 25.583 | 25.232 | 1.00 | 14.86 | C    |   |
| ANISOU | 1133 | CB  | ILE | A | 195 | 2403    | 1334   | 1909   | 173  | -318  | -6   | C |
| ATOM   | 1134 | CG1 | ILE | A | 195 | -3.214  | 26.455 | 25.333 | 1.00 | 15.95 | C    |   |
| ANISOU | 1134 | CG1 | ILE | A | 195 | 2574    | 1461   | 2026   | 226  | -322  | -36  | C |
| ATOM   | 1135 | CD1 | ILE | A | 195 | -3.573  | 27.208 | 24.045 | 1.00 | 15.21 | C    |   |
| ANISOU | 1135 | CD1 | ILE | A | 195 | 2444    | 1377   | 1960   | 202  | -340  | -17  | C |

|        |      |     |     |   |     |        |        |        |      |       |     |   |
|--------|------|-----|-----|---|-----|--------|--------|--------|------|-------|-----|---|
| ATOM   | 1136 | CG2 | ILE | A | 195 | -0.693 | 26.408 | 24.980 | 1.00 | 16.91 |     | C |
| ANISOU | 1136 | CG2 | ILE | A | 195 | 2668   | 1551   | 2207   | 128  | -406  | 30  | C |
| ATOM   | 1137 | C   | ILE | A | 195 | -0.941 | 23.525 | 24.212 | 1.00 | 14.81 |     | C |
| ANISOU | 1137 | C   | ILE | A | 195 | 2289   | 1409   | 1931   | 101  | -235  | 31  | C |
| ATOM   | 1138 | O   | ILE | A | 195 | -0.033 | 23.555 | 23.372 | 1.00 | 18.05 |     | O |
| ANISOU | 1138 | O   | ILE | A | 195 | 2655   | 1832   | 2373   | 53   | -256  | 67  | O |
| ATOM   | 1139 | N   | ASN | A | 196 | -0.956 | 22.656 | 25.218 | 1.00 | 14.72 |     | N |
| ANISOU | 1139 | N   | ASN | A | 196 | 2304   | 1396   | 1892   | 126  | -203  | 10  | N |
| ATOM   | 1140 | CA  | ASN | A | 196 | 0.156  | 21.738 | 25.452 | 1.00 | 15.65 |     | C |
| ANISOU | 1140 | CA  | ASN | A | 196 | 2408   | 1520   | 2018   | 100  | -202  | 24  | C |
| ATOM   | 1141 | CB  | ASN | A | 196 | 0.081  | 21.146 | 26.865 | 1.00 | 15.18 |     | C |
| ANISOU | 1141 | CB  | ASN | A | 196 | 2408   | 1439   | 1921   | 141  | -187  | -2  | C |
| ATOM   | 1142 | CG  | ASN | A | 196 | -0.004 | 22.212 | 27.941 | 1.00 | 17.94 |     | C |
| ANISOU | 1142 | CG  | ASN | A | 196 | 2838   | 1732   | 2247   | 184  | -246  | -21 | C |
| ATOM   | 1143 | OD1 | ASN | A | 196 | 0.406  | 23.356 | 27.738 | 1.00 | 18.28 |     | O |
| ANISOU | 1143 | OD1 | ASN | A | 196 | 2896   | 1739   | 2312   | 173  | -319  | -11 | O |
| ATOM   | 1144 | ND2 | ASN | A | 196 | -0.552 | 21.842 | 29.092 | 1.00 | 15.82 |     | N |
| ANISOU | 1144 | ND2 | ASN | A | 196 | 2624   | 1455   | 1932   | 236  | -217  | -49 | N |
| ATOM   | 1145 | C   | ASN | A | 196 | 0.231  | 20.605 | 24.418 | 1.00 | 17.16 |     | C |
| ANISOU | 1145 | C   | ASN | A | 196 | 2526   | 1770   | 2225   | 68   | -144  | 38  | C |
| ATOM   | 1146 | O   | ASN | A | 196 | 1.314  | 20.129 | 24.092 | 1.00 | 15.55 |     | O |
| ANISOU | 1146 | O   | ASN | A | 196 | 2289   | 1579   | 2040   | 37   | -156  | 59  | O |
| ATOM   | 1147 | N   | GLY | A | 197 | -0.919 | 20.176 | 23.910 | 1.00 | 17.58 |     | N |
| ANISOU | 1147 | N   | GLY | A | 197 | 2551   | 1859   | 2270   | 80   | -84   | 23  | N |
| ATOM   | 1148 | CA  | GLY | A | 197 | -0.950 | 19.127 | 22.904 | 1.00 | 15.20 |     | C |
| ANISOU | 1148 | CA  | GLY | A | 197 | 2186   | 1608   | 1983   | 57   | -36   | 31  | C |
| ATOM   | 1149 | C   | GLY | A | 197 | -0.744 | 17.740 | 23.490 | 1.00 | 16.07 |     | C |
| ANISOU | 1149 | C   | GLY | A | 197 | 2298   | 1727   | 2081   | 61   | 3     | 20  | C |
| ATOM   | 1150 | O   | GLY | A | 197 | -1.049 | 17.491 | 24.662 | 1.00 | 15.55 |     | O |
| ANISOU | 1150 | O   | GLY | A | 197 | 2281   | 1637   | 1989   | 89   | 16    | 4   | O |
| ATOM   | 1151 | N   | PHE | A | 198 | -0.228 | 16.826 | 22.673 | 1.00 | 16.13 |     | N |
| ANISOU | 1151 | N   | PHE | A | 198 | 2255   | 1770   | 2103   | 37   | 21    | 30  | N |
| ATOM   | 1152 | CA  | PHE | A | 198 | -0.037 | 15.436 | 23.103 | 1.00 | 12.33 |     | C |
| ANISOU | 1152 | CA  | PHE | A | 198 | 1775   | 1297   | 1614   | 40   | 54    | 20  | C |
| ATOM   | 1153 | CB  | PHE | A | 198 | -1.211 | 14.566 | 22.658 | 1.00 | 13.04 |     | C |
| ANISOU | 1153 | CB  | PHE | A | 198 | 1836   | 1412   | 1704   | 46   | 112   | 4   | C |
| ATOM   | 1154 | CG  | PHE | A | 198 | -1.289 | 14.374 | 21.166 | 1.00 | 13.03 |     | C |
| ANISOU | 1154 | CG  | PHE | A | 198 | 1773   | 1454   | 1723   | 29   | 120   | 8   | C |
| ATOM   | 1155 | CD1 | PHE | A | 198 | -0.845 | 13.191 | 20.577 | 1.00 | 16.08 |     | C |
| ANISOU | 1155 | CD1 | PHE | A | 198 | 2127   | 1867   | 2117   | 20   | 134   | 6   | C |
| ATOM   | 1156 | CE1 | PHE | A | 198 | -0.917 | 13.008 | 19.199 | 1.00 | 16.90 |     | C |
| ANISOU | 1156 | CE1 | PHE | A | 198 | 2178   | 2011   | 2233   | 13   | 139   | 7   | C |
| ATOM   | 1157 | CZ  | PHE | A | 198 | -1.435 | 14.015 | 18.391 | 1.00 | 13.18 |     | C |
| ANISOU | 1157 | CZ  | PHE | A | 198 | 1687   | 1555   | 1767   | 10   | 132   | 14  | C |
| ATOM   | 1158 | CE2 | PHE | A | 198 | -1.885 | 15.197 | 18.968 | 1.00 | 13.21 |     | C |
| ANISOU | 1158 | CE2 | PHE | A | 198 | 1723   | 1530   | 1766   | 16   | 117   | 18  | C |
| ATOM   | 1159 | CD2 | PHE | A | 198 | -1.806 | 15.370 | 20.354 | 1.00 | 13.14 |     | C |
| ANISOU | 1159 | CD2 | PHE | A | 198 | 1767   | 1481   | 1746   | 26   | 110   | 13  | C |
| ATOM   | 1160 | C   | PHE | A | 198 | 1.245  | 14.839 | 22.548 | 1.00 | 15.08 |     | C |
| ANISOU | 1160 | C   | PHE | A | 198 | 2088   | 1666   | 1977   | 18   | 36    | 35  | C |
| ATOM   | 1161 | O   | PHE | A | 198 | 1.877  | 15.398 | 21.652 | 1.00 | 15.94 |     | O |
| ANISOU | 1161 | O   | PHE | A | 198 | 2159   | 1796   | 2102   | -2   | 10    | 57  | O |
| ATOM   | 1162 | N   | CYS | A | 199 | 1.621  | 13.689 | 23.095 | 1.00 | 12.50 |     | N |
| ANISOU | 1162 | N   | CYS | A | 199 | 1773   | 1335   | 1641   | 25   | 50    | 26  | N |
| ATOM   | 1163 | CA  | CYS | A | 199 | 2.697  | 12.900 | 22.543 | 1.00 | 12.27 |     | C |
| ANISOU | 1163 | CA  | CYS | A | 199 | 1708   | 1333   | 1623   | 13   | 41    | 34  | C |
| ATOM   | 1164 | CB  | CYS | A | 199 | 3.971  | 13.024 | 23.371 | 1.00 | 12.50 |     | C |
| ANISOU | 1164 | CB  | CYS | A | 199 | 1763   | 1336   | 1652   | 12   | -5    | 43  | C |
| ATOM   | 1165 | SG  | CYS | A | 199 | 3.852  | 12.320 | 25.044 | 1.00 | 16.17 |     | S |
| ANISOU | 1165 | SG  | CYS | A | 199 | 2305   | 1750   | 2088   | 39   | -1    | 23  | S |
| ATOM   | 1166 | C   | CYS | A | 199 | 2.239  | 11.447 | 22.433 | 1.00 | 13.37 |     | C |
| ANISOU | 1166 | C   | CYS | A | 199 | 1839   | 1484   | 1757   | 21   | 82    | 14  | C |
| ATOM   | 1167 | O   | CYS | A | 199 | 1.170  | 11.082 | 22.934 | 1.00 | 14.38 |     | O |
| ANISOU | 1167 | O   | CYS | A | 199 | 1991   | 1595   | 1875   | 31   | 116   | 1   | O |
| ATOM   | 1168 | N   | ILE | A | 200 | 3.040  | 10.641 | 21.748 | 1.00 | 13.44 |     | N |
| ANISOU | 1168 | N   | ILE | A | 200 | 1811   | 1523   | 1773   | 18   | 77    | 15  | N |
| ATOM   | 1169 | CA  | ILE | A | 200 | 2.734  | 9.232  | 21.541 | 1.00 | 12.21 |     | C |
| ANISOU | 1169 | CA  | ILE | A | 200 | 1648   | 1375   | 1616   | 27   | 104   | -5  | C |
| ATOM   | 1170 | CB  | ILE | A | 200 | 2.422  | 8.941  | 20.044 | 1.00 | 11.98 |     | C |
| ANISOU | 1170 | CB  | ILE | A | 200 | 1561   | 1393   | 1597   | 27   | 118   | -11 | C |

|        |      |     |     |   |     |       |        |        |      |       |      |   |
|--------|------|-----|-----|---|-----|-------|--------|--------|------|-------|------|---|
| ATOM   | 1171 | CG1 | ILE | A | 200 | 1.224 | 9.770  | 19.556 | 1.00 | 15.30 |      | C |
| ANISOU | 1171 | CG1 | ILE | A | 200 | 1970  | 1820   | 2024   | 20   | 137   | -10  | C |
| ATOM   | 1172 | CD1 | ILE | A | 200 | 0.850 | 9.523  | 18.064 | 1.00 | 15.41 |      | C |
| ANISOU | 1172 | CD1 | ILE | A | 200 | 1932  | 1879   | 2045   | 24   | 147   | -18  | C |
| ATOM   | 1173 | CG2 | ILE | A | 200 | 2.196 | 7.444  | 19.832 | 1.00 | 11.42 |      | C |
| ANISOU | 1173 | CG2 | ILE | A | 200 | 1487  | 1324   | 1528   | 38   | 133   | -34  | C |
| ATOM   | 1174 | C   | ILE | A | 200 | 3.945 | 8.400  | 21.925 | 1.00 | 15.16 |      | C |
| ANISOU | 1174 | C   | ILE | A | 200 | 2030  | 1745   | 1986   | 36   | 80    | -7   | C |
| ATOM   | 1175 | O   | ILE | A | 200 | 5.081 | 8.742  | 21.568 | 1.00 | 14.07 |      | O |
| ANISOU | 1175 | O   | ILE | A | 200 | 1863  | 1629   | 1852   | 33   | 51    | 6    | O |
| ATOM   | 1176 | N   | ILE | A | 201 | 3.697 | 7.318  | 22.656 | 1.00 | 15.60 |      | N |
| ANISOU | 1176 | N   | ILE | A | 201 | 2123  | 1771   | 2033   | 46   | 93    | -22  | N |
| ATOM   | 1177 | CA  | ILE | A | 201 | 4.730 | 6.360  | 23.024 | 1.00 | 17.29 |      | C |
| ANISOU | 1177 | CA  | ILE | A | 201 | 2350  | 1977   | 2241   | 59   | 71    | -30  | C |
| ATOM   | 1178 | CB  | ILE | A | 201 | 4.740 | 6.063  | 24.535 | 1.00 | 19.95 |      | C |
| ANISOU | 1178 | CB  | ILE | A | 201 | 2758  | 2261   | 2561   | 68   | 66    | -30  | C |
| ATOM   | 1179 | CG1 | ILE | A | 201 | 4.646 | 7.348  | 25.364 | 1.00 | 24.86 |      | C |
| ANISOU | 1179 | CG1 | ILE | A | 201 | 3414  | 2859   | 3172   | 65   | 54    | -17  | C |
| ATOM   | 1180 | CD1 | ILE | A | 201 | 5.746 | 8.353  | 25.089 | 1.00 | 32.14 |      | C |
| ANISOU | 1180 | CD1 | ILE | A | 201 | 4310  | 3796   | 4106   | 58   | 9     | -4   | C |
| ATOM   | 1181 | CG2 | ILE | A | 201 | 5.973 | 5.244  | 24.899 | 1.00 | 19.45 |      | C |
| ANISOU | 1181 | CG2 | ILE | A | 201 | 2707  | 2189   | 2492   | 83   | 32    | -38  | C |
| ATOM   | 1182 | C   | ILE | A | 201 | 4.458 | 5.045  | 22.311 | 1.00 | 12.48 |      | C |
| ANISOU | 1182 | C   | ILE | A | 201 | 1721  | 1382   | 1637   | 68   | 85    | -49  | C |
| ATOM   | 1183 | O   | ILE | A | 201 | 3.406 | 4.431  | 22.501 | 1.00 | 17.07 |      | O |
| ANISOU | 1183 | O   | ILE | A | 201 | 2322  | 1941   | 2222   | 64   | 112   | -58  | O |
| ATOM   | 1184 | N   | GLU | A | 202 | 5.406 | 4.621  | 21.486 | 1.00 | 13.69 |      | N |
| ANISOU | 1184 | N   | GLU | A | 202 | 1835  | 1573   | 1794   | 82   | 64    | -56  | N |
| ATOM   | 1185 | CA  | GLU | A | 202 | 5.267 | 3.401  | 20.708 | 1.00 | 16.78 |      | C |
| ANISOU | 1185 | CA  | GLU | A | 202 | 2208  | 1979   | 2188   | 99   | 67    | -80  | C |
| ATOM   | 1186 | CB  | GLU | A | 202 | 5.584 | 3.675  | 19.234 | 1.00 | 16.48 |      | C |
| ANISOU | 1186 | CB  | GLU | A | 202 | 2106  | 2006   | 2151   | 110  | 65    | -81  | C |
| ATOM   | 1187 | CG  | GLU | A | 202 | 4.700 | 4.729  | 18.574 | 1.00 | 19.14 |      | C |
| ANISOU | 1187 | CG  | GLU | A | 202 | 2416  | 2362   | 2493   | 91   | 88    | -68  | C |
| ATOM   | 1188 | CD  | GLU | A | 202 | 3.449 | 4.140  | 17.949 | 1.00 | 19.64 |      | C |
| ANISOU | 1188 | CD  | GLU | A | 202 | 2475  | 2422   | 2567   | 93   | 108   | -89  | C |
| ATOM   | 1189 | OE1 | GLU | A | 202 | 3.287 | 2.899  | 17.970 | 1.00 | 20.25 |      | O |
| ANISOU | 1189 | OE1 | GLU | A | 202 | 2567  | 2479   | 2647   | 106  | 102   | -113 | O |
| ATOM   | 1190 | OE2 | GLU | A | 202 | 2.630 | 4.920  | 17.421 | 1.00 | 20.88 |      | O |
| ANISOU | 1190 | OE2 | GLU | A | 202 | 2613  | 2592   | 2729   | 80   | 124   | -82  | O |
| ATOM   | 1191 | C   | GLU | A | 202 | 6.230 | 2.351  | 21.240 | 1.00 | 18.37 |      | C |
| ANISOU | 1191 | C   | GLU | A | 202 | 2436  | 2164   | 2382   | 122  | 39    | -93  | C |
| ATOM   | 1192 | O   | GLU | A | 202 | 7.444 | 2.500  | 21.115 | 1.00 | 18.30 |      | O |
| ANISOU | 1192 | O   | GLU | A | 202 | 2404  | 2182   | 2368   | 136  | 13    | -90  | O |
| ATOM   | 1193 | N   | ASN | A | 203 | 5.694 | 1.289  | 21.833 | 1.00 | 19.55 |      | N |
| ANISOU | 1193 | N   | ASN | A | 203 | 2631  | 2267   | 2532   | 124  | 43    | -106 | N |
| ATOM   | 1194 | CA  | ASN | A | 203 | 6.545 | 0.206  | 22.289 | 1.00 | 17.05 |      | C |
| ANISOU | 1194 | CA  | ASN | A | 203 | 2343  | 1929   | 2207   | 148  | 12    | -121 | C |
| ATOM   | 1195 | CB  | ASN | A | 203 | 6.031 | -0.399 | 23.594 | 1.00 | 21.02 |      | C |
| ANISOU | 1195 | CB  | ASN | A | 203 | 2917  | 2364   | 2704   | 138  | 19    | -115 | C |
| ATOM   | 1196 | CG  | ASN | A | 203 | 6.998 | -1.405 | 24.179 | 1.00 | 24.39 |      | C |
| ANISOU | 1196 | CG  | ASN | A | 203 | 3381  | 2764   | 3120   | 164  | -19   | -128 | C |
| ATOM   | 1197 | OD1 | ASN | A | 203 | 7.952 | -1.820 | 23.517 | 1.00 | 23.23 |      | O |
| ANISOU | 1197 | OD1 | ASN | A | 203 | 3204  | 2650   | 2973   | 193  | -49   | -148 | O |
| ATOM   | 1198 | ND2 | ASN | A | 203 | 6.770 | -1.795 | 25.425 | 1.00 | 23.74 |      | N |
| ANISOU | 1198 | ND2 | ASN | A | 203 | 3367  | 2627   | 3027   | 158  | -17   | -117 | N |
| ATOM   | 1199 | C   | ASN | A | 203 | 6.601 | -0.850 | 21.201 | 1.00 | 15.68 |      | C |
| ANISOU | 1199 | C   | ASN | A | 203 | 2142  | 1778   | 2038   | 173  | -1    | -150 | C |
| ATOM   | 1200 | O   | ASN | A | 203 | 5.610 | -1.539 | 20.943 | 1.00 | 16.49 |      | O |
| ANISOU | 1200 | O   | ASN | A | 203 | 2256  | 1857   | 2153   | 165  | 10    | -161 | O |
| ATOM   | 1201 | N   | PHE | A | 204 | 7.761 | -0.955 | 20.557 | 1.00 | 18.16 |      | N |
| ANISOU | 1201 | N   | PHE | A | 204 | 2419  | 2139   | 2343   | 205  | -26   | -161 | N |
| ATOM   | 1202 | CA  | PHE | A | 204 | 7.949 | -1.860 | 19.426 | 1.00 | 19.89 |      | C |
| ANISOU | 1202 | CA  | PHE | A | 204 | 2609  | 2390   | 2559   | 242  | -42   | -192 | C |
| ATOM   | 1203 | CB  | PHE | A | 204 | 8.581 | -1.109 | 18.249 | 1.00 | 20.15 |      | C |
| ANISOU | 1203 | CB  | PHE | A | 204 | 2570  | 2505   | 2581   | 260  | -36   | -186 | C |
| ATOM   | 1204 | CG  | PHE | A | 204 | 7.573 | -0.496 | 17.315 | 1.00 | 20.30 |      | C |
| ANISOU | 1204 | CG  | PHE | A | 204 | 2558  | 2549   | 2605   | 243  | -8    | -181 | C |
| ATOM   | 1205 | CD1 | PHE | A | 204 | 6.451 | 0.149  | 17.813 | 1.00 | 21.90 |      | C |
| ANISOU | 1205 | CD1 | PHE | A | 204 | 2783  | 2716   | 2824   | 200  | 19    | -163 | C |

|        |      |     |     |   |     |        |         |        |      |       |      |   |
|--------|------|-----|-----|---|-----|--------|---------|--------|------|-------|------|---|
| ATOM   | 1206 | CE1 | PHE | A | 204 | 5.519  | 0.713   | 16.955 | 1.00 | 20.18 | C    |   |
| ANISOU | 1206 | CE1 | PHE | A | 204 | 2536   | 2520    | 2612   | 188  | 41    | -160 | C |
| ATOM   | 1207 | CZ  | PHE | A | 204 | 5.701  | 0.633   | 15.592 | 1.00 | 19.88 | C    |   |
| ANISOU | 1207 | CZ  | PHE | A | 204 | 2453   | 2540    | 2561   | 218  | 37    | -174 | C |
| ATOM   | 1208 | CE2 | PHE | A | 204 | 6.816  | -0.007  | 15.083 | 1.00 | 23.27 | C    |   |
| ANISOU | 1208 | CE2 | PHE | A | 204 | 2862   | 3010    | 2970   | 264  | 15    | -190 | C |
| ATOM   | 1209 | CD2 | PHE | A | 204 | 7.745  | -0.566  | 15.944 | 1.00 | 25.29 | C    |   |
| ANISOU | 1209 | CD2 | PHE | A | 204 | 3142   | 3244    | 3223   | 276  | -7    | -194 | C |
| ATOM   | 1210 | C   | PHE | A | 204 | 8.772  | -3.090  | 19.799 | 1.00 | 19.83 | C    |   |
| ANISOU | 1210 | C   | PHE | A | 204 | 2633   | 2360    | 2543   | 279  | -82   | -218 | C |
| ATOM   | 1211 | O   | PHE | A | 204 | 9.298  | -3.792  | 18.934 | 1.00 | 19.56 | O    |   |
| ANISOU | 1211 | O   | PHE | A | 204 | 2574   | 2359    | 2498   | 323  | -104  | -246 | O |
| ATOM   | 1212 | N   | LYS | A | 205 | 8.879  | -3.352  | 21.095 | 1.00 | 21.94 | N    |   |
| ANISOU | 1212 | N   | LYS | A | 205 | 2958   | 2569    | 2810   | 266  | -92   | -208 | N |
| ATOM   | 1213 | CA  | LYS | A | 205 | 9.542  | -4.562  | 21.572 | 1.00 | 26.88 | C    |   |
| ANISOU | 1213 | CA  | LYS | A | 205 | 3626   | 3160    | 3429   | 300  | -132  | -232 | C |
| ATOM   | 1214 | CB  | LYS | A | 205 | 9.291  | -4.728  | 23.073 | 1.00 | 34.22 | C    |   |
| ANISOU | 1214 | CB  | LYS | A | 205 | 4628   | 4016    | 4356   | 275  | -133  | -213 | C |
| ATOM   | 1215 | CG  | LYS | A | 205 | 9.865  | -5.998  | 23.676 | 1.00 | 49.78 | C    |   |
| ANISOU | 1215 | CG  | LYS | A | 205 | 6655   | 5940    | 6320   | 306  | -176  | -233 | C |
| ATOM   | 1216 | CD  | LYS | A | 205 | 11.382 | -5.947  | 23.731 | 1.00 | 62.68 | C    |   |
| ANISOU | 1216 | CD  | LYS | A | 205 | 8268   | 7609    | 7940   | 348  | -214  | -247 | C |
| ATOM   | 1217 | CE  | LYS | A | 205 | 11.961 | -7.255  | 24.250 | 1.00 | 70.63 | C    |   |
| ANISOU | 1217 | CE  | LYS | A | 205 | 9330   | 8568    | 8938   | 385  | -263  | -272 | C |
| ATOM   | 1218 | NZ  | LYS | A | 205 | 13.450 | -7.283  | 24.163 | 1.00 | 73.79 | N    |   |
| ANISOU | 1218 | NZ  | LYS | A | 205 | 9699   | 9011    | 9328   | 433  | -302  | -290 | N |
| ATOM   | 1219 | C   | LYS | A | 205 | 9.058  | -5.795  | 20.802 | 1.00 | 29.41 | C    |   |
| ANISOU | 1219 | C   | LYS | A | 205 | 3954   | 3465    | 3754   | 323  | -151  | -265 | C |
| ATOM   | 1220 | O   | LYS | A | 205 | 9.855  | -6.662  | 20.425 | 1.00 | 26.81 | O    |   |
| ANISOU | 1220 | O   | LYS | A | 205 | 3624   | 3147    | 3415   | 373  | -190  | -297 | O |
| ATOM   | 1221 | N   | GLY | A | 206 | 7.754  | -5.866  | 20.553 | 1.00 | 27.81 | N    |   |
| ANISOU | 1221 | N   | GLY | A | 206 | 3759   | 3237    | 3571   | 291  | -128  | -260 | N |
| ATOM   | 1222 | CA  | GLY | A | 206 | 7.169  | -7.022  | 19.890 | 1.00 | 30.88 | C    |   |
| ANISOU | 1222 | CA  | GLY | A | 206 | 4160   | 3599    | 3973   | 307  | -153  | -291 | C |
| ATOM   | 1223 | C   | GLY | A | 206 | 6.919  | -6.883  | 18.398 | 1.00 | 28.87 | C    |   |
| ANISOU | 1223 | C   | GLY | A | 206 | 3850   | 3402    | 3718   | 330  | -152  | -314 | C |
| ATOM   | 1224 | O   | GLY | A | 206 | 6.116  | -7.623  | 17.825 | 1.00 | 33.41 | O    |   |
| ANISOU | 1224 | O   | GLY | A | 206 | 4434   | 3950    | 4311   | 332  | -169  | -336 | O |
| ATOM   | 1225 | N   | PHE | A | 207 | 7.612  | -5.945  | 17.761 | 1.00 | 23.97 | N    |   |
| ANISOU | 1225 | N   | PHE | A | 207 | 3172   | 2858    | 3076   | 349  | -136  | -309 | N |
| ATOM   | 1226 | CA  | PHE | A | 207 | 7.466  | -5.716  | 16.326 | 1.00 | 24.30 | C    |   |
| ANISOU | 1226 | CA  | PHE | A | 207 | 3162   | 2963    | 3109   | 377  | -131  | -327 | C |
| ATOM   | 1227 | CB  | PHE | A | 207 | 8.099  | -4.370  | 15.952 | 1.00 | 23.67 | C    |   |
| ANISOU | 1227 | CB  | PHE | A | 207 | 3023   | 2959    | 3011   | 374  | -99   | -298 | C |
| ATOM   | 1228 | CG  | PHE | A | 207 | 7.804  | -3.907  | 14.549 | 1.00 | 27.08 | C    |   |
| ANISOU | 1228 | CG  | PHE | A | 207 | 3403   | 3457    | 3431   | 393  | -84   | -305 | C |
| ATOM   | 1229 | CD1 | PHE | A | 207 | 6.537  | -4.042  | 14.000 | 1.00 | 26.21 | C    |   |
| ANISOU | 1229 | CD1 | PHE | A | 207 | 3299   | 3324    | 3336   | 378  | -80   | -317 | C |
| ATOM   | 1230 | CE1 | PHE | A | 207 | 6.269  | -3.597  | 12.709 | 1.00 | 22.47 | C    |   |
| ANISOU | 1230 | CE1 | PHE | A | 207 | 2782   | 2909    | 2846   | 400  | -69   | -324 | C |
| ATOM   | 1231 | CZ  | PHE | A | 207 | 7.270  | -2.992  | 11.960 | 1.00 | 25.67 | C    |   |
| ANISOU | 1231 | CZ  | PHE | A | 207 | 3135   | 3400    | 3217   | 435  | -57   | -312 | C |
| ATOM   | 1232 | CE2 | PHE | A | 207 | 8.534  | -2.843  | 12.503 | 1.00 | 31.42 | C    |   |
| ANISOU | 1232 | CE2 | PHE | A | 207 | 3851   | 4155    | 3934   | 446  | -58   | -295 | C |
| ATOM   | 1233 | CD2 | PHE | A | 207 | 8.794  | -3.292  | 13.793 | 1.00 | 26.93 | C    |   |
| ANISOU | 1233 | CD2 | PHE | A | 207 | 3326   | 3523    | 3383   | 425  | -74   | -294 | C |
| ATOM   | 1234 | C   | PHE | A | 207 | 8.143  | -6.843  | 15.559 | 1.00 | 28.46 | C    |   |
| ANISOU | 1234 | C   | PHE | A | 207 | 3689   | 3509    | 3616   | 447  | -178  | -374 | C |
| ATOM   | 1235 | O   | PHE | A | 207 | 9.370  | -6.899  | 15.489 | 1.00 | 34.24 | O    |   |
| ANISOU | 1235 | O   | PHE | A | 207 | 4401   | 4286    | 4324   | 490  | -191  | -381 | O |
| ATOM   | 1236 | N   | THR | A | 208 | 7.341  | -7.737  | 14.984 | 1.00 | 28.12 | N    |   |
| ANISOU | 1236 | N   | THR | A | 208 | 3667   | 3431    | 3586   | 459  | -205  | -406 | N |
| ATOM   | 1237 | CA  | THR | A | 208 | 7.869  | -8.898  | 14.266 | 1.00 | 30.05 | C    |   |
| ANISOU | 1237 | CA  | THR | A | 208 | 3922   | 3682    | 3812   | 531  | -259  | -458 | C |
| ATOM   | 1238 | CB  | THR | A | 208 | 6.885  | -10.076 | 14.311 | 1.00 | 26.72 | C    |   |
| ANISOU | 1238 | CB  | THR | A | 208 | 3556   | 3175    | 3424   | 522  | -303  | -485 | C |
| ATOM   | 1239 | OG1 | THR | A | 208 | 5.679  | -9.710  | 13.628 | 1.00 | 24.88 | O    |   |
| ANISOU | 1239 | OG1 | THR | A | 208 | 3302   | 2940    | 3211   | 492  | -286  | -483 | O |
| ATOM   | 1240 | CG2 | THR | A | 208 | 6.559  | -10.445 | 15.740 | 1.00 | 29.20 | C    |   |
| ANISOU | 1240 | CG2 | THR | A | 208 | 3925   | 3401    | 3767   | 466  | -303  | -457 | C |

|        |      |     |     |   |     |        |         |        |      |       |      |   |
|--------|------|-----|-----|---|-----|--------|---------|--------|------|-------|------|---|
| ATOM   | 1241 | C   | THR | A | 208 | 8.116  | -8.586  | 12.800 | 1.00 | 29.51 | C    |   |
| ANISOU | 1241 | C   | THR | A | 208 | 3800   | 3702    | 3711   | 586  | -255  | -480 | C |
| ATOM   | 1242 | O   | THR | A | 208 | 7.536  | -7.653  | 12.248 | 1.00 | 25.06 | O    |   |
| ANISOU | 1242 | O   | THR | A | 208 | 3199   | 3174    | 3148   | 561  | -217  | -459 | O |
| ATOM   | 1243 | N   | MET | A | 209 | 8.961  | -9.385  | 12.161 | 1.00 | 31.44 | N    |   |
| ANISOU | 1243 | N   | MET | A | 209 | 4043   | 3981    | 3924   | 667  | -294  | -523 | N |
| ATOM   | 1244 | CA  | MET | A | 209 | 9.211  | -9.219  | 10.736 | 1.00 | 35.22 | C    |   |
| ANISOU | 1244 | CA  | MET | A | 209 | 4475   | 4545    | 4362   | 731  | -292  | -547 | C |
| ATOM   | 1245 | CB  | MET | A | 209 | 10.284 | -10.199 | 10.252 | 1.00 | 36.83 | C    |   |
| ANISOU | 1245 | CB  | MET | A | 209 | 4683   | 4785    | 4527   | 828  | -338  | -596 | C |
| ATOM   | 1246 | CG  | MET | A | 209 | 11.549 | -10.171 | 11.093 | 1.00 | 42.34 | C    |   |
| ANISOU | 1246 | CG  | MET | A | 209 | 5371   | 5502    | 5214   | 840  | -335  | -580 | C |
| ATOM   | 1247 | SD  | MET | A | 209 | 12.984 | -10.891 | 10.273 | 1.00 | 64.93 | S    |   |
| ANISOU | 1247 | SD  | MET | A | 209 | 8202   | 8451    | 8017   | 964  | -367  | -628 | S |
| ATOM   | 1248 | CE  | MET | A | 209 | 13.271 | -9.685  | 8.981  | 1.00 | 68.84 | C    |   |
| ANISOU | 1248 | CE  | MET | A | 209 | 8606   | 9081    | 8469   | 988  | -304  | -599 | C |
| ATOM   | 1249 | C   | MET | A | 209 | 7.918  | -9.408  | 9.953  | 1.00 | 33.75 | C    |   |
| ANISOU | 1249 | C   | MET | A | 209 | 4302   | 4330    | 4192   | 722  | -307  | -569 | C |
| ATOM   | 1250 | O   | MET | A | 209 | 7.712  | -8.778  | 8.916  | 1.00 | 31.41 | O    |   |
| ANISOU | 1250 | O   | MET | A | 209 | 3964   | 4099    | 3872   | 742  | -284  | -568 | O |
| ATOM   | 1251 | N   | GLN | A | 210 | 7.039  | -10.267 | 10.463 | 1.00 | 31.70 | N    |   |
| ANISOU | 1251 | N   | GLN | A | 210 | 4098   | 3971    | 3975   | 690  | -346  | -585 | N |
| ATOM   | 1252 | CA  | GLN | A | 210 | 5.753  | -10.498 | 9.815  | 1.00 | 36.67 | C    |   |
| ANISOU | 1252 | CA  | GLN | A | 210 | 4739   | 4563    | 4632   | 674  | -366  | -605 | C |
| ATOM   | 1253 | CB  | GLN | A | 210 | 4.991  | -11.628 | 10.506 | 1.00 | 44.28 | C    |   |
| ANISOU | 1253 | CB  | GLN | A | 210 | 5764   | 5412    | 5648   | 640  | -417  | -619 | C |
| ATOM   | 1254 | CG  | GLN | A | 210 | 3.660  | -11.965 | 9.852  | 1.00 | 59.68 | C    |   |
| ANISOU | 1254 | CG  | GLN | A | 210 | 7724   | 7317    | 7637   | 621  | -449  | -641 | C |
| ATOM   | 1255 | CD  | GLN | A | 210 | 3.167  | -13.357 | 10.211 | 1.00 | 72.47 | C    |   |
| ANISOU | 1255 | CD  | GLN | A | 210 | 9404   | 8830    | 9301   | 613  | -521  | -668 | C |
| ATOM   | 1256 | OE1 | GLN | A | 210 | 3.943  | -14.212 | 10.645 | 1.00 | 77.78 | O    |   |
| ANISOU | 1256 | OE1 | GLN | A | 210 | 10118  | 9473    | 9963   | 647  | -561  | -687 | O |
| ATOM   | 1257 | NE2 | GLN | A | 210 | 1.873  | -13.593 | 10.026 | 1.00 | 73.87 | N    |   |
| ANISOU | 1257 | NE2 | GLN | A | 210 | 9587   | 8948    | 9531   | 567  | -543  | -669 | N |
| ATOM   | 1258 | C   | GLN | A | 210 | 4.918  | -9.221  | 9.808  | 1.00 | 35.91 | C    |   |
| ANISOU | 1258 | C   | GLN | A | 210 | 4605   | 4487    | 4554   | 608  | -306  | -560 | C |
| ATOM   | 1259 | O   | GLN | A | 210 | 4.353  | -8.840  | 8.784  | 1.00 | 37.37 | O    |   |
| ANISOU | 1259 | O   | GLN | A | 210 | 4763   | 4706    | 4729   | 623  | -302  | -571 | O |
| ATOM   | 1260 | N   | GLN | A | 211 | 4.843  | -8.560  | 10.956 | 1.00 | 31.87 | N    |   |
| ANISOU | 1260 | N   | GLN | A | 211 | 4094   | 3951    | 4065   | 539  | -263  | -510 | N |
| ATOM   | 1261 | CA  | GLN | A | 211 | 4.152  | -7.282  | 11.040 | 1.00 | 28.08 | C    |   |
| ANISOU | 1261 | CA  | GLN | A | 211 | 3580   | 3491    | 3597   | 482  | -207  | -467 | C |
| ATOM   | 1262 | CB  | GLN | A | 211 | 4.140  | -6.775  | 12.482 | 1.00 | 29.62 | C    |   |
| ANISOU | 1262 | CB  | GLN | A | 211 | 3792   | 3647    | 3815   | 416  | -171  | -420 | C |
| ATOM   | 1263 | CG  | GLN | A | 211 | 3.265  | -7.602  | 13.419 | 1.00 | 32.30 | C    |   |
| ANISOU | 1263 | CG  | GLN | A | 211 | 4182   | 3890    | 4201   | 369  | -188  | -417 | C |
| ATOM   | 1264 | CD  | GLN | A | 211 | 3.366  | -7.143  | 14.854 | 1.00 | 34.40 | C    |   |
| ANISOU | 1264 | CD  | GLN | A | 211 | 4470   | 4124    | 4478   | 318  | -152  | -372 | C |
| ATOM   | 1265 | OE1 | GLN | A | 211 | 4.412  | -6.663  | 15.289 | 1.00 | 36.79 | O    |   |
| ANISOU | 1265 | OE1 | GLN | A | 211 | 4766   | 4460    | 4752   | 330  | -139  | -357 | O |
| ATOM   | 1266 | NE2 | GLN | A | 211 | 2.278  | -7.292  | 15.606 | 1.00 | 38.75 | N    |   |
| ANISOU | 1266 | NE2 | GLN | A | 211 | 5045   | 4611    | 5067   | 261  | -138  | -350 | N |
| ATOM   | 1267 | C   | GLN | A | 211 | 4.826  | -6.273  | 10.112 | 1.00 | 29.70 | C    |   |
| ANISOU | 1267 | C   | GLN | A | 211 | 3730   | 3798    | 3757   | 517  | -175  | -456 | C |
| ATOM   | 1268 | O   | GLN | A | 211 | 4.166  | -5.610  | 9.307  | 1.00 | 33.44 | O    |   |
| ANISOU | 1268 | O   | GLN | A | 211 | 4176   | 4303    | 4227   | 512  | -158  | -452 | O |
| ATOM   | 1269 | N   | ALA | A | 212 | 6.148  | -6.179  | 10.210 | 1.00 | 29.15 | N    |   |
| ANISOU | 1269 | N   | ALA | A | 212 | 3643   | 3780    | 3652   | 554  | -169  | -450 | N |
| ATOM   | 1270 | CA  | ALA | A | 212 | 6.913  | -5.251  | 9.380  | 1.00 | 30.92 | C    |   |
| ANISOU | 1270 | CA  | ALA | A | 212 | 3809   | 4104    | 3834   | 585  | -137  | -430 | C |
| ATOM   | 1271 | CB  | ALA | A | 212 | 8.407  | -5.445  | 9.602  | 1.00 | 29.26 | C    |   |
| ANISOU | 1271 | CB  | ALA | A | 212 | 3581   | 3943    | 3594   | 628  | -140  | -428 | C |
| ATOM   | 1272 | C   | ALA | A | 212 | 6.574  | -5.419  | 7.905  | 1.00 | 31.95 | C    |   |
| ANISOU | 1272 | C   | ALA | A | 212 | 3921   | 4284    | 3933   | 643  | -151  | -463 | C |
| ATOM   | 1273 | O   | ALA | A | 212 | 6.330  | -4.445  | 7.195  | 1.00 | 34.29 | O    |   |
| ANISOU | 1273 | O   | ALA | A | 212 | 4181   | 4634    | 4214   | 636  | -118  | -439 | O |
| ATOM   | 1274 | N   | ALA | A | 213 | 6.558  | -6.665  | 7.451  | 1.00 | 33.31 | N    |   |
| ANISOU | 1274 | N   | ALA | A | 213 | 4126   | 4434    | 4096   | 702  | -204  | -519 | N |
| ATOM   | 1275 | CA  | ALA | A | 213 | 6.353  | -6.957  | 6.041  | 1.00 | 34.00 | C    |   |
| ANISOU | 1275 | CA  | ALA | A | 213 | 4204   | 4569    | 4147   | 773  | -228  | -560 | C |

|        |      |     |     |   |     |        |        |        |      |       |      |   |
|--------|------|-----|-----|---|-----|--------|--------|--------|------|-------|------|---|
| ATOM   | 1276 | CB  | ALA | A | 213 | 6.718  | -8.410 | 5.742  | 1.00 | 37.96 | C    |   |
| ANISOU | 1276 | CB  | ALA | A | 213 | 4745   | 5047   | 4632   | 850  | -295  | -624 | C |
| ATOM   | 1277 | C   | ALA | A | 213 | 4.926  | -6.666 | 5.598  | 1.00 | 34.63 | C    |   |
| ANISOU | 1277 | C   | ALA | A | 213 | 4291   | 4611   | 4256   | 736  | -232  | -564 | C |
| ATOM   | 1278 | O   | ALA | A | 213 | 4.675  | -6.438 | 4.417  | 1.00 | 43.39 | O    |   |
| ANISOU | 1278 | O   | ALA | A | 213 | 5383   | 5771   | 5331   | 781  | -235  | -581 | O |
| ATOM   | 1279 | N   | SER | A | 214 | 3.992  | -6.677 | 6.544  | 1.00 | 35.04 | N    |   |
| ANISOU | 1279 | N   | SER | A | 214 | 4367   | 4577   | 4368   | 658  | -231  | -548 | N |
| ATOM   | 1280 | CA  | SER | A | 214 | 2.584  | -6.487 | 6.213  | 1.00 | 37.17 | C    |   |
| ANISOU | 1280 | CA  | SER | A | 214 | 4642   | 4807   | 4675   | 620  | -239  | -554 | C |
| ATOM   | 1281 | CB  | SER | A | 214 | 1.699  | -7.363 | 7.104  | 1.00 | 42.72 | C    |   |
| ANISOU | 1281 | CB  | SER | A | 214 | 5387   | 5402   | 5443   | 568  | -273  | -564 | C |
| ATOM   | 1282 | OG  | SER | A | 214 | 1.278  | -6.657 | 8.256  | 1.00 | 50.97 | O    |   |
| ANISOU | 1282 | OG  | SER | A | 214 | 6427   | 6414   | 6524   | 486  | -225  | -513 | O |
| ATOM   | 1283 | C   | SER | A | 214 | 2.124  | -5.023 | 6.284  | 1.00 | 38.55 | C    |   |
| ANISOU | 1283 | C   | SER | A | 214 | 4779   | 5013   | 4856   | 565  | -179  | -503 | C |
| ATOM   | 1284 | O   | SER | A | 214 | 1.048  | -4.685 | 5.788  | 1.00 | 38.11 | O    |   |
| ANISOU | 1284 | O   | SER | A | 214 | 4716   | 4945   | 4819   | 547  | -182  | -508 | O |
| ATOM   | 1285 | N   | LEU | A | 215 | 2.929  | -4.160 | 6.901  | 1.00 | 32.68 | N    |   |
| ANISOU | 1285 | N   | LEU | A | 215 | 4013   | 4307   | 4097   | 540  | -132  | -456 | N |
| ATOM   | 1286 | CA  | LEU | A | 215 | 2.595  | -2.735 | 6.980  | 1.00 | 27.10 | C    |   |
| ANISOU | 1286 | CA  | LEU | A | 215 | 3276   | 3627   | 3395   | 492  | -82   | -407 | C |
| ATOM   | 1287 | CB  | LEU | A | 215 | 3.639  | -1.972 | 7.793  | 1.00 | 29.43 | C    |   |
| ANISOU | 1287 | CB  | LEU | A | 215 | 3553   | 3950   | 3678   | 466  | -44   | -359 | C |
| ATOM   | 1288 | CG  | LEU | A | 215 | 3.508  | -2.081 | 9.308  | 1.00 | 31.99 | C    |   |
| ANISOU | 1288 | CG  | LEU | A | 215 | 3908   | 4202   | 4043   | 408  | -37   | -341 | C |
| ATOM   | 1289 | CD1 | LEU | A | 215 | 4.561  | -1.229 | 10.011 | 1.00 | 30.48 | C    |   |
| ANISOU | 1289 | CD1 | LEU | A | 215 | 3699   | 4041   | 3840   | 388  | -8    | -296 | C |
| ATOM   | 1290 | CD2 | LEU | A | 215 | 2.106  | -1.670 | 9.728  | 1.00 | 38.00 | C    |   |
| ANISOU | 1290 | CD2 | LEU | A | 215 | 4682   | 4910   | 4848   | 350  | -24   | -330 | C |
| ATOM   | 1291 | C   | LEU | A | 215 | 2.484  | -2.118 | 5.593  | 1.00 | 28.23 | C    |   |
| ANISOU | 1291 | C   | LEU | A | 215 | 3386   | 3841   | 3497   | 532  | -74   | -410 | C |
| ATOM   | 1292 | O   | LEU | A | 215 | 3.438  | -2.145 | 4.816  | 1.00 | 30.91 | O    |   |
| ANISOU | 1292 | O   | LEU | A | 215 | 3705   | 4254   | 3784   | 593  | -72   | -414 | O |
| ATOM   | 1293 | N   | ARG | A | 216 | 1.321  | -1.560 | 5.284  | 1.00 | 25.13 | N    |   |
| ANISOU | 1293 | N   | ARG | A | 216 | 2989   | 3430   | 3127   | 502  | -69   | -407 | N |
| ATOM   | 1294 | CA  | ARG | A | 216 | 1.122  | -0.909 | 3.996  | 1.00 | 25.20 | C    |   |
| ANISOU | 1294 | CA  | ARG | A | 216 | 2975   | 3503   | 3099   | 539  | -63   | -407 | C |
| ATOM   | 1295 | CB  | ARG | A | 216 | -0.351 | -0.960 | 3.587  | 1.00 | 31.04 | C    |   |
| ANISOU | 1295 | CB  | ARG | A | 216 | 3724   | 4197   | 3873   | 523  | -88   | -433 | C |
| ATOM   | 1296 | CG  | ARG | A | 216 | -0.865 | -2.351 | 3.260  | 1.00 | 41.90 | C    |   |
| ANISOU | 1296 | CG  | ARG | A | 216 | 5130   | 5523   | 5268   | 557  | -150  | -495 | C |
| ATOM   | 1297 | CD  | ARG | A | 216 | -2.369 | -2.344 | 3.031  | 1.00 | 53.58 | C    |   |
| ANISOU | 1297 | CD  | ARG | A | 216 | 6610   | 6964   | 6784   | 543  | -177  | -518 | C |
| ATOM   | 1298 | NE  | ARG | A | 216 | -3.114 | -1.968 | 4.233  | 1.00 | 65.70 | N    |   |
| ANISOU | 1298 | NE  | ARG | A | 216 | 8123   | 8563   | 8277   | 574  | -165  | -512 | N |
| ATOM   | 1299 | CZ  | ARG | A | 216 | -4.441 | -1.885 | 4.301  | 1.00 | 71.47 | C    |   |
| ANISOU | 1299 | CZ  | ARG | A | 216 | 8859   | 9342   | 8956   | 653  | -196  | -547 | C |
| ATOM   | 1300 | NH1 | ARG | A | 216 | -5.180 | -2.145 | 3.230  | 1.00 | 76.90 | N    |   |
| ANISOU | 1300 | NH1 | ARG | A | 216 | 9572   | 10021  | 9627   | 712  | -245  | -596 | N |
| ATOM   | 1301 | NH2 | ARG | A | 216 | -5.030 | -1.539 | 5.440  | 1.00 | 64.94 | N    |   |
| ANISOU | 1301 | NH2 | ARG | A | 216 | 8015   | 8571   | 8089   | 678  | -182  | -534 | N |
| ATOM   | 1302 | C   | ARG | A | 216 | 1.601  | 0.538  | 4.049  | 1.00 | 27.56 | C    |   |
| ANISOU | 1302 | C   | ARG | A | 216 | 3239   | 3854   | 3378   | 509  | -12   | -346 | C |
| ATOM   | 1303 | O   | ARG | A | 216 | 1.272  | 1.281  | 4.975  | 1.00 | 22.11 | O    |   |
| ANISOU | 1303 | O   | ARG | A | 216 | 2549   | 3129   | 2722   | 445  | 13    | -311 | O |
| ATOM   | 1304 | N   | THR | A | 217 | 2.380  | 0.937  | 3.054  | 1.00 | 22.92 | N    |   |
| ANISOU | 1304 | N   | THR | A | 217 | 2624   | 3352   | 2733   | 559  | 2     | -331 | N |
| ATOM   | 1305 | CA  | THR | A | 217 | 2.851  | 2.313  | 2.966  | 1.00 | 21.37 | C    |   |
| ANISOU | 1305 | CA  | THR | A | 217 | 2394   | 3207   | 2519   | 531  | 46    | -269 | C |
| ATOM   | 1306 | CB  | THR | A | 217 | 3.715  | 2.508  | 1.719  | 1.00 | 25.84 | C    |   |
| ANISOU | 1306 | CB  | THR | A | 217 | 2929   | 3874   | 3016   | 596  | 60    | -255 | C |
| ATOM   | 1307 | OG1 | THR | A | 217 | 4.889  | 1.703  | 1.851  | 1.00 | 29.63 | O    |   |
| ANISOU | 1307 | OG1 | THR | A | 217 | 3399   | 4387   | 3471   | 640  | 56    | -267 | O |
| ATOM   | 1308 | CG2 | THR | A | 217 | 4.114  | 3.975  | 1.546  | 1.00 | 23.05 | C    |   |
| ANISOU | 1308 | CG2 | THR | A | 217 | 2540   | 3570   | 2648   | 561  | 102   | -183 | C |
| ATOM   | 1309 | C   | THR | A | 217 | 1.697  | 3.312  | 2.981  | 1.00 | 19.55 | C    |   |
| ANISOU | 1309 | C   | THR | A | 217 | 2167   | 2946   | 2317   | 481  | 56    | -250 | C |
| ATOM   | 1310 | O   | THR | A | 217 | 1.804  | 4.386  | 3.575  | 1.00 | 21.75 | O    |   |
| ANISOU | 1310 | O   | THR | A | 217 | 2434   | 3220   | 2612   | 429  | 83    | -201 | O |



|        |      |     |     |   |     |        |        |        |      |       |      |   |
|--------|------|-----|-----|---|-----|--------|--------|--------|------|-------|------|---|
| ATOM   | 1311 | N   | SER | A | 218 | 0.584  | 2.957  | 2.346  | 1.00 | 20.19 |      | N |
| ANISOU | 1311 | N   | SER | A | 218 | 2263   | 3002   | 2406   | 500  | 28    | -291 | N |
| ATOM   | 1312 | CA  | SER | A | 218 | -0.575 | 3.844  | 2.335  | 1.00 | 19.35 |      | C |
| ANISOU | 1312 | CA  | SER | A | 218 | 2158   | 2866   | 2328   | 459  | 33    | -279 | C |
| ATOM   | 1313 | CB  | SER | A | 218 | -1.656 | 3.330  | 1.374  | 1.00 | 26.63 |      | C |
| ANISOU | 1313 | CB  | SER | A | 218 | 3091   | 3775   | 3251   | 497  | -6    | -330 | C |
| ATOM   | 1314 | OG  | SER | A | 218 | -2.111 | 2.042  | 1.748  | 1.00 | 26.25 |      | O |
| ANISOU | 1314 | OG  | SER | A | 218 | 3066   | 3668   | 3240   | 501  | -43   | -380 | O |
| ATOM   | 1315 | C   | SER | A | 218 | -1.150 | 4.086  | 3.735  | 1.00 | 19.13 |      | C |
| ANISOU | 1315 | C   | SER | A | 218 | 2142   | 2766   | 2361   | 388  | 44    | -265 | C |
| ATOM   | 1316 | O   | SER | A | 218 | -1.703 | 5.155  | 4.008  | 1.00 | 17.99 |      | O |
| ANISOU | 1316 | O   | SER | A | 218 | 1992   | 2608   | 2233   | 348  | 63    | -236 | O |
| ATOM   | 1317 | N   | ASP | A | 219 | -1.017 | 3.096  | 4.616  | 1.00 | 22.64 |      | N |
| ANISOU | 1317 | N   | ASP | A | 219 | 2605   | 3163   | 2832   | 377  | 33    | -287 | N |
| ATOM   | 1318 | CA  | ASP | A | 219 | -1.478 | 3.223  | 5.998  | 1.00 | 22.41 |      | C |
| ANISOU | 1318 | CA  | ASP | A | 219 | 2592   | 3070   | 2853   | 316  | 47    | -272 | C |
| ATOM   | 1319 | CB  | ASP | A | 219 | -1.609 | 1.839  | 6.650  | 1.00 | 23.83 |      | C |
| ANISOU | 1319 | CB  | ASP | A | 219 | 2798   | 3195   | 3063   | 315  | 23    | -306 | C |
| ATOM   | 1320 | CG  | ASP | A | 219 | -2.843 | 1.082  | 6.189  | 1.00 | 27.90 |      | C |
| ANISOU | 1320 | CG  | ASP | A | 219 | 3320   | 3670   | 3612   | 321  | -12   | -349 | C |
| ATOM   | 1321 | OD1 | ASP | A | 219 | -3.768 | 1.709  | 5.626  | 1.00 | 30.20 |      | O |
| ANISOU | 1321 | OD1 | ASP | A | 219 | 3596   | 3966   | 3912   | 316  | -12   | -351 | O |
| ATOM   | 1322 | OD2 | ASP | A | 219 | -2.889 | -0.145 | 6.400  | 1.00 | 31.44 |      | O |
| ANISOU | 1322 | OD2 | ASP | A | 219 | 3789   | 4077   | 4079   | 331  | -43   | -381 | O |
| ATOM   | 1323 | C   | ASP | A | 219 | -0.519 | 4.096  | 6.810  | 1.00 | 17.12 |      | C |
| ANISOU | 1323 | C   | ASP | A | 219 | 1916   | 2416   | 2173   | 286  | 78    | -222 | C |
| ATOM   | 1324 | O   | ASP | A | 219 | -0.943 | 4.942  | 7.603  | 1.00 | 17.60 |      | O |
| ANISOU | 1324 | O   | ASP | A | 219 | 1982   | 2447   | 2257   | 241  | 97    | -195 | O |
| ATOM   | 1325 | N   | LEU | A | 220 | 0.777  | 3.886  | 6.618  | 1.00 | 14.80 |      | N |
| ANISOU | 1325 | N   | LEU | A | 220 | 1611   | 2167   | 1845   | 315  | 80    | -211 | N |
| ATOM   | 1326 | CA  | LEU | A | 220 | 1.767  | 4.736  | 7.260  | 1.00 | 14.48 |      | C |
| ANISOU | 1326 | CA  | LEU | A | 220 | 1559   | 2145   | 1798   | 288  | 102   | -162 | C |
| ATOM   | 1327 | CB  | LEU | A | 220 | 3.182  | 4.268  | 6.932  | 1.00 | 18.30 |      | C |
| ANISOU | 1327 | CB  | LEU | A | 220 | 2023   | 2686   | 2247   | 328  | 100   | -157 | C |
| ATOM   | 1328 | CG  | LEU | A | 220 | 3.537  | 2.862  | 7.436  | 1.00 | 22.88 |      | C |
| ANISOU | 1328 | CG  | LEU | A | 220 | 2626   | 3236   | 2833   | 352  | 77    | -197 | C |
| ATOM   | 1329 | CD1 | LEU | A | 220 | 4.927  | 2.440  | 6.957  | 1.00 | 21.66 |      | C |
| ANISOU | 1329 | CD1 | LEU | A | 220 | 2444   | 3147   | 2637   | 403  | 75    | -196 | C |
| ATOM   | 1330 | CD2 | LEU | A | 220 | 3.428  | 2.802  | 8.953  | 1.00 | 25.71 |      | C |
| ANISOU | 1330 | CD2 | LEU | A | 220 | 3015   | 3525   | 3230   | 303  | 79    | -189 | C |
| ATOM   | 1331 | C   | LEU | A | 220 | 1.581  | 6.186  | 6.826  | 1.00 | 20.09 |      | C |
| ANISOU | 1331 | C   | LEU | A | 220 | 2249   | 2884   | 2499   | 266  | 120   | -120 | C |
| ATOM   | 1332 | O   | LEU | A | 220 | 1.695  | 7.100  | 7.640  | 1.00 | 18.22 |      | O |
| ANISOU | 1332 | O   | LEU | A | 220 | 2017   | 2625   | 2281   | 223  | 132   | -85  | O |
| ATOM   | 1333 | N   | ARG | A | 221 | 1.292  | 6.399  | 5.545  | 1.00 | 19.59 |      | N |
| ANISOU | 1333 | N   | ARG | A | 221 | 2169   | 2866   | 2408   | 299  | 118   | -125 | N |
| ATOM   | 1334 | CA  | ARG | A | 221 | 1.089  | 7.761  | 5.049  | 1.00 | 12.94 |      | C |
| ANISOU | 1334 | CA  | ARG | A | 221 | 1312   | 2050   | 1555   | 281  | 132   | -83  | C |
| ATOM   | 1335 | CB  | ARG | A | 221 | 0.954  | 7.788  | 3.521  | 1.00 | 16.13 |      | C |
| ANISOU | 1335 | CB  | ARG | A | 221 | 1699   | 2513   | 1915   | 331  | 128   | -90  | C |
| ATOM   | 1336 | CG  | ARG | A | 221 | 2.262  | 7.579  | 2.777  | 1.00 | 15.65 |      | C |
| ANISOU | 1336 | CG  | ARG | A | 221 | 1610   | 2534   | 1805   | 374  | 140   | -69  | C |
| ATOM   | 1337 | CD  | ARG | A | 221 | 2.075  | 7.819  | 1.283  | 1.00 | 20.57 |      | C |
| ANISOU | 1337 | CD  | ARG | A | 221 | 2221   | 3220   | 2377   | 423  | 141   | -67  | C |
| ATOM   | 1338 | NE  | ARG | A | 221 | 1.795  | 9.226  | 1.000  | 1.00 | 15.85 |      | N |
| ANISOU | 1338 | NE  | ARG | A | 221 | 1615   | 2631   | 1778   | 389  | 154   | -15  | N |
| ATOM   | 1339 | CZ  | ARG | A | 221 | 1.787  | 9.749  | -0.224 | 1.00 | 23.17 |      | C |
| ANISOU | 1339 | CZ  | ARG | A | 221 | 2530   | 3616   | 2657   | 422  | 162   | 7    | C |
| ATOM   | 1340 | NH1 | ARG | A | 221 | 2.032  | 8.977  | -1.277 | 1.00 | 22.03 |      | N |
| ANISOU | 1340 | NH1 | ARG | A | 221 | 2380   | 3530   | 2460   | 493  | 159   | -20  | N |
| ATOM   | 1341 | NH2 | ARG | A | 221 | 1.530  | 11.040 | -0.392 | 1.00 | 26.29 |      | N |
| ANISOU | 1341 | NH2 | ARG | A | 221 | 2923   | 4009   | 3055   | 386  | 169   | 57   | N |
| ATOM   | 1342 | C   | ARG | A | 221 | -0.153 | 8.370  | 5.676  | 1.00 | 13.56 |      | C |
| ANISOU | 1342 | C   | ARG | A | 221 | 1412   | 2067   | 1674   | 240  | 130   | -87  | C |
| ATOM   | 1343 | O   | ARG | A | 221 | -0.204 | 9.573  | 5.940  | 1.00 | 13.53 |      | O |
| ANISOU | 1343 | O   | ARG | A | 221 | 1408   | 2057   | 1677   | 207  | 139   | -49  | O |
| ATOM   | 1344 | N   | LYS | A | 222 | -1.165 | 7.540  | 5.912  | 1.00 | 13.92 |      | N |
| ANISOU | 1344 | N   | LYS | A | 222 | 1476   | 2067   | 1747   | 243  | 117   | -134 | N |
| ATOM   | 1345 | CA  | LYS | A | 222 | -2.383 | 8.024  | 6.548  | 1.00 | 13.97 |      | C |
| ANISOU | 1345 | CA  | LYS | A | 222 | 1496   | 2020   | 1792   | 208  | 120   | -139 | C |

|        |      |     |     |   |     |        |        |        |      |       |      |   |
|--------|------|-----|-----|---|-----|--------|--------|--------|------|-------|------|---|
| ATOM   | 1346 | CB  | LYS | A | 222 | -3.437 | 6.910  | 6.559  | 1.00 | 16.83 |      | C |
| ANISOU | 1346 | CB  | LYS | A | 222 | 1867   | 2344   | 2185   | 217  | 103   | -189 | C |
| ATOM   | 1347 | CG  | LYS | A | 222 | -4.866 | 7.359  | 6.827  | 1.00 | 18.15 |      | C |
| ANISOU | 1347 | CG  | LYS | A | 222 | 2034   | 2472   | 2390   | 192  | 105   | -199 | C |
| ATOM   | 1348 | CD  | LYS | A | 222 | -5.840 | 6.177  | 6.718  | 1.00 | 20.65 |      | C |
| ANISOU | 1348 | CD  | LYS | A | 222 | 2350   | 2754   | 2742   | 199  | 84    | -245 | C |
| ATOM   | 1349 | CE  | LYS | A | 222 | -5.686 | 5.395  | 5.402  | 1.00 | 19.17 |      | C |
| ANISOU | 1349 | CE  | LYS | A | 222 | 2156   | 2596   | 2530   | 249  | 50    | -280 | C |
| ATOM   | 1350 | NZ  | LYS | A | 222 | -6.815 | 4.433  | 5.175  | 1.00 | 20.94 |      | N |
| ANISOU | 1350 | NZ  | LYS | A | 222 | 2378   | 2781   | 2797   | 252  | 18    | -324 | N |
| ATOM   | 1351 | C   | LYS | A | 222 | -2.068 | 8.530  | 7.965  | 1.00 | 15.61 |      | C |
| ANISOU | 1351 | C   | LYS | A | 222 | 1720   | 2190   | 2021   | 165  | 135   | -111 | C |
| ATOM   | 1352 | O   | LYS | A | 222 | -2.565 | 9.582  | 8.395  | 1.00 | 13.91 |      | O |
| ANISOU | 1352 | O   | LYS | A | 222 | 1513   | 1955   | 1819   | 139  | 143   | -90  | O |
| ATOM   | 1353 | N   | MET | A | 223 | -1.230 | 7.793  | 8.690  | 1.00 | 16.16 |      | N |
| ANISOU | 1353 | N   | MET | A | 223 | 1800   | 2249   | 2091   | 163  | 136   | -112 | N |
| ATOM   | 1354 | CA  | MET | A | 223 | -0.827 | 8.245  | 10.017 | 1.00 | 15.52 |      | C |
| ANISOU | 1354 | CA  | MET | A | 223 | 1739   | 2134   | 2024   | 128  | 146   | -87  | C |
| ATOM   | 1355 | CB  | MET | A | 223 | -0.070 | 7.152  | 10.784 | 1.00 | 15.51 |      | C |
| ANISOU | 1355 | CB  | MET | A | 223 | 1753   | 2115   | 2025   | 133  | 142   | -99  | C |
| ATOM   | 1356 | CG  | MET | A | 223 | 0.214  | 7.536  | 12.233 | 1.00 | 18.68 |      | C |
| ANISOU | 1356 | CG  | MET | A | 223 | 2184   | 2474   | 2441   | 101  | 148   | -78  | C |
| ATOM   | 1357 | SD  | MET | A | 223 | 0.753  | 6.114  | 13.191 | 1.00 | 21.85 |      | S |
| ANISOU | 1357 | SD  | MET | A | 223 | 2614   | 2841   | 2848   | 108  | 141   | -99  | S |
| ATOM   | 1358 | CE  | MET | A | 223 | 0.823  | 6.835  | 14.839 | 1.00 | 21.61 |      | C |
| ANISOU | 1358 | CE  | MET | A | 223 | 2623   | 2760   | 2828   | 74   | 149   | -74  | C |
| ATOM   | 1359 | C   | MET | A | 223 | -0.005 | 9.531  | 9.961  | 1.00 | 14.42 |      | C |
| ANISOU | 1359 | C   | MET | A | 223 | 1589   | 2021   | 1871   | 113  | 147   | -39  | C |
| ATOM   | 1360 | O   | MET | A | 223 | -0.216 | 10.440 | 10.764 | 1.00 | 15.05 |      | O |
| ANISOU | 1360 | O   | MET | A | 223 | 1687   | 2068   | 1964   | 84   | 149   | -19  | O |
| ATOM   | 1361 | N   | VAL | A | 224 | 0.925  | 9.609  | 9.012  | 1.00 | 15.57 |      | N |
| ANISOU | 1361 | N   | VAL | A | 224 | 1704   | 2225   | 1987   | 133  | 145   | -20  | N |
| ATOM   | 1362 | CA  | VAL | A | 224 | 1.687  | 10.841 | 8.799  | 1.00 | 15.58 |      | C |
| ANISOU | 1362 | CA  | VAL | A | 224 | 1687   | 2254   | 1977   | 115  | 145   | 33   | C |
| ATOM   | 1363 | CB  | VAL | A | 224 | 2.607  | 10.726 | 7.560  | 1.00 | 14.72 |      | C |
| ANISOU | 1363 | CB  | VAL | A | 224 | 1538   | 2222   | 1832   | 145  | 151   | 54   | C |
| ATOM   | 1364 | CG1 | VAL | A | 224 | 3.107  | 12.105 | 7.110  | 1.00 | 13.82 |      | C |
| ANISOU | 1364 | CG1 | VAL | A | 224 | 1403   | 2139   | 1710   | 121  | 152   | 115  | C |
| ATOM   | 1365 | CG2 | VAL | A | 224 | 3.772  | 9.797  | 7.858  | 1.00 | 17.35 |      | C |
| ANISOU | 1365 | CG2 | VAL | A | 224 | 1858   | 2578   | 2157   | 163  | 151   | 48   | C |
| ATOM   | 1366 | C   | VAL | A | 224 | 0.749  | 12.035 | 8.627  | 1.00 | 15.05 |      | C |
| ANISOU | 1366 | C   | VAL | A | 224 | 1631   | 2168   | 1920   | 95   | 143   | 48   | C |
| ATOM   | 1367 | O   | VAL | A | 224 | 0.903  | 13.070 | 9.292  | 1.00 | 15.85 |      | O |
| ANISOU | 1367 | O   | VAL | A | 224 | 1745   | 2241   | 2035   | 63   | 134   | 79   | O |
| ATOM   | 1368 | N   | ASP | A | 225 | -0.229 | 11.894 | 7.736  | 1.00 | 15.63 |      | N |
| ANISOU | 1368 | N   | ASP | A | 225 | 1700   | 2253   | 1986   | 118  | 143   | 23   | N |
| ATOM   | 1369 | CA  | ASP | A | 225 | -1.147 | 12.992 | 7.449  | 1.00 | 17.75 |      | C |
| ANISOU | 1369 | CA  | ASP | A | 225 | 1976   | 2507   | 2260   | 107  | 138   | 33   | C |
| ATOM   | 1370 | CB  | ASP | A | 225 | -1.977 | 12.705 | 6.183  | 1.00 | 15.30 |      | C |
| ANISOU | 1370 | CB  | ASP | A | 225 | 1655   | 2226   | 1935   | 142  | 134   | 6    | C |
| ATOM   | 1371 | CG  | ASP | A | 225 | -1.127 | 12.673 | 4.920  | 1.00 | 18.70 |      | C |
| ANISOU | 1371 | CG  | ASP | A | 225 | 2058   | 2725   | 2321   | 171  | 137   | 29   | C |
| ATOM   | 1372 | OD1 | ASP | A | 225 | -0.019 | 13.241 | 4.932  | 1.00 | 20.81 |      | O |
| ANISOU | 1372 | OD1 | ASP | A | 225 | 2311   | 3021   | 2575   | 155  | 143   | 79   | O |
| ATOM   | 1373 | OD2 | ASP | A | 225 | -1.574 | 12.087 | 3.916  | 1.00 | 17.91 |      | O |
| ANISOU | 1373 | OD2 | ASP | A | 225 | 1951   | 2654   | 2201   | 211  | 132   | -1   | O |
| ATOM   | 1374 | C   | ASP | A | 225 | -2.046 | 13.317 | 8.645  | 1.00 | 16.98 |      | C |
| ANISOU | 1374 | C   | ASP | A | 225 | 1910   | 2346   | 2196   | 83   | 137   | 17   | C |
| ATOM   | 1375 | O   | ASP | A | 225 | -2.437 | 14.471 | 8.842  | 1.00 | 14.60 |      | O |
| ANISOU | 1375 | O   | ASP | A | 225 | 1622   | 2024   | 1902   | 67   | 128   | 37   | O |
| ATOM   | 1376 | N   | MET | A | 226 | -2.366 | 12.311 | 9.459  | 1.00 | 15.38 |      | N |
| ANISOU | 1376 | N   | MET | A | 226 | 1720   | 2112   | 2011   | 84   | 146   | -16  | N |
| ATOM   | 1377 | CA  | MET | A | 226 | -3.116 | 12.570 | 10.682 | 1.00 | 16.02 |      | C |
| ANISOU | 1377 | CA  | MET | A | 226 | 1829   | 2140   | 2117   | 65   | 152   | -26  | C |
| ATOM   | 1378 | CB  | MET | A | 226 | -3.424 | 11.276 | 11.451 | 1.00 | 14.61 |      | C |
| ANISOU | 1378 | CB  | MET | A | 226 | 1661   | 1934   | 1955   | 66   | 165   | -57  | C |
| ATOM   | 1379 | CG  | MET | A | 226 | -4.361 | 11.487 | 12.640 | 1.00 | 16.82 |      | C |
| ANISOU | 1379 | CG  | MET | A | 226 | 1967   | 2168   | 2257   | 53   | 179   | -66  | C |
| ATOM   | 1380 | SD  | MET | A | 226 | -4.657 | 9.999  | 13.617 | 1.00 | 17.12 |      | S |
| ANISOU | 1380 | SD  | MET | A | 226 | 2019   | 2172   | 2313   | 48   | 197   | -90  | S |

|        |      |     |     |   |     |        |        |        |      |       |     |   |
|--------|------|-----|-----|---|-----|--------|--------|--------|------|-------|-----|---|
| ATOM   | 1381 | CE  | MET | A | 226 | -3.068 | 9.820  | 14.424 | 1.00 | 15.31 |     | C |
| ANISOU | 1381 | CE  | MET | A | 226 | 1815   | 1937   | 2065   | 42   | 189   | -68 | C |
| ATOM   | 1382 | C   | MET | A | 226 | -2.344 | 13.540 | 11.575 | 1.00 | 16.59 |     | C |
| ANISOU | 1382 | C   | MET | A | 226 | 1923   | 2191   | 2188   | 42   | 142   | 10  | C |
| ATOM   | 1383 | O   | MET | A | 226 | -2.923 | 14.467 | 12.135 | 1.00 | 16.20 |     | O |
| ANISOU | 1383 | O   | MET | A | 226 | 1896   | 2111   | 2148   | 33   | 137   | 15  | O |
| ATOM   | 1384 | N   | LEU | A | 227 | -1.037 | 13.328 | 11.706 | 1.00 | 15.21 |     | N |
| ANISOU | 1384 | N   | LEU | A | 227 | 1742   | 2033   | 2004   | 36   | 136   | 32  | N |
| ATOM   | 1385 | CA  | LEU | A | 227 | -0.230 | 14.171 | 12.591 | 1.00 | 13.06 |     | C |
| ANISOU | 1385 | CA  | LEU | A | 227 | 1489   | 1735   | 1736   | 12   | 119   | 65  | C |
| ATOM   | 1386 | CB  | LEU | A | 227 | 1.034  | 13.435 | 13.041 | 1.00 | 11.17 |     | C |
| ANISOU | 1386 | CB  | LEU | A | 227 | 1245   | 1505   | 1494   | 10   | 116   | 72  | C |
| ATOM   | 1387 | CG  | LEU | A | 227 | 0.785  | 12.086 | 13.721 | 1.00 | 14.83 |     | C |
| ANISOU | 1387 | CG  | LEU | A | 227 | 1726   | 1949   | 1961   | 23   | 131   | 34  | C |
| ATOM   | 1388 | CD1 | LEU | A | 227 | 2.108  | 11.388 | 14.016 | 1.00 | 15.49 |     | C |
| ANISOU | 1388 | CD1 | LEU | A | 227 | 1802   | 2046   | 2039   | 26   | 122   | 41  | C |
| ATOM   | 1389 | CD2 | LEU | A | 227 | -0.053 | 12.251 | 14.989 | 1.00 | 15.76 |     | C |
| ANISOU | 1389 | CD2 | LEU | A | 227 | 1887   | 2009   | 2090   | 15   | 137   | 19  | C |
| ATOM   | 1390 | C   | LEU | A | 227 | 0.156  | 15.495 | 11.938 | 1.00 | 18.33 |     | C |
| ANISOU | 1390 | C   | LEU | A | 227 | 2144   | 2419   | 2400   | -3   | 99    | 108 | C |
| ATOM   | 1391 | O   | LEU | A | 227 | 0.230  | 16.528 | 12.604 | 1.00 | 19.40 |     | O |
| ANISOU | 1391 | O   | LEU | A | 227 | 2306   | 2518   | 2546   | -22  | 76    | 128 | O |
| ATOM   | 1392 | N   | GLN | A | 228 | 0.384  | 15.452 | 10.632 | 1.00 | 17.25 |     | N |
| ANISOU | 1392 | N   | GLN | A | 228 | 1971   | 2335   | 2246   | 7    | 104   | 123 | N |
| ATOM   | 1393 | CA  | GLN | A | 228 | 0.915  | 16.582 | 9.880  | 1.00 | 21.89 |     | C |
| ANISOU | 1393 | CA  | GLN | A | 228 | 2542   | 2948   | 2827   | -9   | 88    | 174 | C |
| ATOM   | 1394 | CB  | GLN | A | 228 | 1.809  | 16.051 | 8.750  | 1.00 | 24.33 |     | C |
| ANISOU | 1394 | CB  | GLN | A | 228 | 2805   | 3329   | 3110   | 6    | 103   | 195 | C |
| ATOM   | 1395 | CG  | GLN | A | 228 | 2.829  | 17.022 | 8.209  | 1.00 | 26.41 |     | C |
| ANISOU | 1395 | CG  | GLN | A | 228 | 3040   | 3624   | 3368   | -18  | 92    | 263 | C |
| ATOM   | 1396 | CD  | GLN | A | 228 | 3.969  | 16.311 | 7.498  | 1.00 | 23.32 |     | C |
| ANISOU | 1396 | CD  | GLN | A | 228 | 2601   | 3306   | 2954   | -2   | 112   | 284 | C |
| ATOM   | 1397 | OE1 | GLN | A | 228 | 5.103  | 16.303 | 7.975  | 1.00 | 23.74 |     | O |
| ANISOU | 1397 | OE1 | GLN | A | 228 | 2634   | 3368   | 3019   | -21  | 106   | 313 | O |
| ATOM   | 1398 | NE2 | GLN | A | 228 | 3.668  | 15.695 | 6.366  | 1.00 | 15.48 |     | N |
| ANISOU | 1398 | NE2 | GLN | A | 228 | 1590   | 2367   | 1927   | 39   | 134   | 266 | N |
| ATOM   | 1399 | C   | GLN | A | 228 | -0.182 | 17.486 | 9.311  | 1.00 | 21.89 |     | C |
| ANISOU | 1399 | C   | GLN | A | 228 | 2554   | 2936   | 2825   | -5   | 80    | 173 | C |
| ATOM   | 1400 | O   | GLN | A | 228 | 0.022  | 18.698 | 9.138  | 1.00 | 19.17 |     | O |
| ANISOU | 1400 | O   | GLN | A | 228 | 2217   | 2582   | 2485   | -26  | 57    | 215 | O |
| ATOM   | 1401 | N   | ASP | A | 229 | -1.347 | 16.908 | 9.028  | 1.00 | 15.89 |     | N |
| ANISOU | 1401 | N   | ASP | A | 229 | 1799   | 2176   | 2064   | 21   | 94    | 127 | N |
| ATOM   | 1402 | CA  | ASP | A | 229 | -2.472 | 17.684 | 8.504  | 1.00 | 14.95 |     | C |
| ANISOU | 1402 | CA  | ASP | A | 229 | 1689   | 2045   | 1944   | 31   | 85    | 119 | C |
| ATOM   | 1403 | CB  | ASP | A | 229 | -3.094 | 16.992 | 7.289  | 1.00 | 15.26 |     | C |
| ANISOU | 1403 | CB  | ASP | A | 229 | 1706   | 2126   | 1967   | 64   | 97    | 92  | C |
| ATOM   | 1404 | CG  | ASP | A | 229 | -2.517 | 17.474 | 5.984  | 1.00 | 33.51 |     | C |
| ANISOU | 1404 | CG  | ASP | A | 229 | 3996   | 4488   | 4247   | 71   | 92    | 133 | C |
| ATOM   | 1405 | OD1 | ASP | A | 229 | -1.426 | 18.083 | 5.998  | 1.00 | 39.88 |     | O |
| ANISOU | 1405 | OD1 | ASP | A | 229 | 4795   | 5309   | 5048   | 46   | 86    | 186 | O |
| ATOM   | 1406 | OD2 | ASP | A | 229 | -3.169 | 17.238 | 4.944  | 1.00 | 34.29 |     | O |
| ANISOU | 1406 | OD2 | ASP | A | 229 | 4085   | 4614   | 4328   | 101  | 93    | 113 | O |
| ATOM   | 1407 | C   | ASP | A | 229 | -3.569 | 17.924 | 9.527  | 1.00 | 17.19 |     | C |
| ANISOU | 1407 | C   | ASP | A | 229 | 2006   | 2275   | 2251   | 32   | 82    | 86  | C |
| ATOM   | 1408 | O   | ASP | A | 229 | -3.999 | 19.055 | 9.733  | 1.00 | 18.00 |     | O |
| ANISOU | 1408 | O   | ASP | A | 229 | 2131   | 2348   | 2360   | 26   | 61    | 97  | O |
| ATOM   | 1409 | N   | SER | A | 230 | -4.041 | 16.856 | 10.156 | 1.00 | 12.59 |     | N |
| ANISOU | 1409 | N   | SER | A | 230 | 1424   | 1680   | 1679   | 42   | 104   | 46  | N |
| ATOM   | 1410 | CA  | SER | A | 230 | -5.173 | 16.983 | 11.066 | 1.00 | 15.25 |     | C |
| ANISOU | 1410 | CA  | SER | A | 230 | 1784   | 1977   | 2035   | 48   | 111   | 16  | C |
| ATOM   | 1411 | CB  | SER | A | 230 | -5.810 | 15.615 | 11.325 | 1.00 | 18.44 |     | C |
| ANISOU | 1411 | CB  | SER | A | 230 | 2175   | 2380   | 2451   | 58   | 138   | -24 | C |
| ATOM   | 1412 | OG  | SER | A | 230 | -6.982 | 15.762 | 12.097 | 1.00 | 17.23 |     | O |
| ANISOU | 1412 | OG  | SER | A | 230 | 2034   | 2197   | 2315   | 64   | 151   | -48 | O |
| ATOM   | 1413 | C   | SER | A | 230 | -4.814 | 17.656 | 12.396 | 1.00 | 19.66 |     | C |
| ANISOU | 1413 | C   | SER | A | 230 | 2380   | 2492   | 2598   | 34   | 100   | 29  | C |
| ATOM   | 1414 | O   | SER | A | 230 | -5.520 | 18.564 | 12.852 | 1.00 | 16.85 |     | O |
| ANISOU | 1414 | O   | SER | A | 230 | 2050   | 2107   | 2247   | 41   | 88    | 24  | O |
| ATOM   | 1415 | N   | PHE | A | 231 | -3.715 | 17.220 | 13.010 | 1.00 | 14.77 |     | N |
| ANISOU | 1415 | N   | PHE | A | 231 | 1768   | 1868   | 1976   | 19   | 99    | 44  | N |

|        |      |     |     |   |     |        |        |        |      |       |     |   |
|--------|------|-----|-----|---|-----|--------|--------|--------|------|-------|-----|---|
| ATOM   | 1416 | CA  | PHE | A | 231 | -3.372 | 17.663 | 14.366 | 1.00 | 16.34 |     | C |
| ANISOU | 1416 | CA  | PHE | A | 231 | 2008   | 2023   | 2177   | 11   | 87    | 50  | C |
| ATOM   | 1417 | CB  | PHE | A | 231 | -3.533 | 16.483 | 15.345 | 1.00 | 11.70 |     | C |
| ANISOU | 1417 | CB  | PHE | A | 231 | 1432   | 1422   | 1591   | 18   | 116   | 23  | C |
| ATOM   | 1418 | CG  | PHE | A | 231 | -4.899 | 15.863 | 15.335 | 1.00 | 14.43 |     | C |
| ANISOU | 1418 | CG  | PHE | A | 231 | 1768   | 1770   | 1946   | 34   | 148   | -11 | C |
| ATOM   | 1419 | CD1 | PHE | A | 231 | -5.996 | 16.557 | 15.816 | 1.00 | 18.00 |     | C |
| ANISOU | 1419 | CD1 | PHE | A | 231 | 2237   | 2201   | 2400   | 49   | 153   | -25 | C |
| ATOM   | 1420 | CE1 | PHE | A | 231 | -7.256 | 15.983 | 15.812 | 1.00 | 22.11 |     | C |
| ANISOU | 1420 | CE1 | PHE | A | 231 | 2739   | 2727   | 2934   | 62   | 184   | -53 | C |
| ATOM   | 1421 | CZ  | PHE | A | 231 | -7.428 | 14.694 | 15.336 | 1.00 | 23.05 |     | C |
| ANISOU | 1421 | CZ  | PHE | A | 231 | 2826   | 2865   | 3067   | 57   | 205   | -67 | C |
| ATOM   | 1422 | CE2 | PHE | A | 231 | -6.339 | 13.989 | 14.852 | 1.00 | 19.84 |     | C |
| ANISOU | 1422 | CE2 | PHE | A | 231 | 2410   | 2475   | 2654   | 46   | 196   | -57 | C |
| ATOM   | 1423 | CD2 | PHE | A | 231 | -5.083 | 14.572 | 14.860 | 1.00 | 19.57 |     | C |
| ANISOU | 1423 | CD2 | PHE | A | 231 | 2390   | 2442   | 2603   | 36   | 171   | -30 | C |
| ATOM   | 1424 | C   | PHE | A | 231 | -1.977 | 18.283 | 14.582 | 1.00 | 13.70 |     | C |
| ANISOU | 1424 | C   | PHE | A | 231 | 1683   | 1681   | 1843   | -13  | 53    | 91  | C |
| ATOM   | 1425 | O   | PHE | A | 231 | -1.432 | 18.168 | 15.687 | 1.00 | 15.16 |     | O |
| ANISOU | 1425 | O   | PHE | A | 231 | 1896   | 1836   | 2030   | -18  | 43    | 91  | O |
| ATOM   | 1426 | N   | PRO | A | 232 | -1.399 | 18.951 | 13.559 | 1.00 | 13.12 |     | N |
| ANISOU | 1426 | N   | PRO | A | 232 | 1584   | 1632   | 1768   | -28  | 32    | 128 | N |
| ATOM   | 1427 | CA  | PRO | A | 232 | -0.020 | 19.450 | 13.691 | 1.00 | 16.79 |     | C |
| ANISOU | 1427 | CA  | PRO | A | 232 | 2044   | 2095   | 2239   | -57  | 2     | 173 | C |
| ATOM   | 1428 | CB  | PRO | A | 232 | 0.239  | 20.126 | 12.332 | 1.00 | 21.00 |     | C |
| ANISOU | 1428 | CB  | PRO | A | 232 | 2545   | 2666   | 2768   | -69  | -8    | 215 | C |
| ATOM   | 1429 | CG  | PRO | A | 232 | -1.133 | 20.449 | 11.815 | 1.00 | 17.35 |     | C |
| ANISOU | 1429 | CG  | PRO | A | 232 | 2093   | 2201   | 2299   | -47  | 0     | 189 | C |
| ATOM   | 1430 | CD  | PRO | A | 232 | -1.933 | 19.241 | 12.217 | 1.00 | 15.69 |     | C |
| ANISOU | 1430 | CD  | PRO | A | 232 | 1882   | 1993   | 2085   | -20  | 37    | 135 | C |
| ATOM   | 1431 | C   | PRO | A | 232 | 0.201  | 20.451 | 14.837 | 1.00 | 18.28 |     | C |
| ANISOU | 1431 | C   | PRO | A | 232 | 2282   | 2223   | 2441   | -69  | -41   | 183 | C |
| ATOM   | 1432 | O   | PRO | A | 232 | 1.297  | 20.480 | 15.391 | 1.00 | 18.70 |     | O |
| ANISOU | 1432 | O   | PRO | A | 232 | 2337   | 2263   | 2504   | -88  | -65   | 204 | O |
| ATOM   | 1433 | N   | ALA | A | 233 | -0.803 | 21.250 | 15.189 | 1.00 | 16.18 |     | N |
| ANISOU | 1433 | N   | ALA | A | 233 | 2053   | 1919   | 2175   | -53  | -56   | 165 | N |
| ATOM   | 1434 | CA  | ALA | A | 233 | -0.644 | 22.211 | 16.284 | 1.00 | 14.99 |     | C |
| ANISOU | 1434 | CA  | ALA | A | 233 | 1955   | 1708   | 2032   | -55  | -103  | 167 | C |
| ATOM   | 1435 | CB  | ALA | A | 233 | -1.807 | 23.186 | 16.321 | 1.00 | 18.26 |     | C |
| ANISOU | 1435 | CB  | ALA | A | 233 | 2403   | 2093   | 2442   | -31  | -120  | 149 | C |
| ATOM   | 1436 | C   | ALA | A | 233 | -0.502 | 21.524 | 17.634 | 1.00 | 18.09 |     | C |
| ANISOU | 1436 | C   | ALA | A | 233 | 2381   | 2075   | 2418   | -39  | -93   | 138 | C |
| ATOM   | 1437 | O   | ALA | A | 233 | -0.014 | 22.121 | 18.604 | 1.00 | 17.77 |     | O |
| ANISOU | 1437 | O   | ALA | A | 233 | 2383   | 1986   | 2381   | -41  | -137  | 143 | O |
| ATOM   | 1438 | N   | TRP | A | 234 | -0.932 | 20.267 | 17.694 | 1.00 | 13.90 |     | N |
| ANISOU | 1438 | N   | TRP | A | 234 | 1833   | 1572   | 1876   | -24  | -41   | 109 | N |
| ATOM   | 1439 | CA  | TRP | A | 234 | -1.027 | 19.546 | 18.963 | 1.00 | 16.40 |     | C |
| ANISOU | 1439 | CA  | TRP | A | 234 | 2184   | 1865   | 2181   | -5   | -23   | 81  | C |
| ATOM   | 1440 | CB  | TRP | A | 234 | -2.483 | 19.142 | 19.232 | 1.00 | 15.75 |     | C |
| ANISOU | 1440 | CB  | TRP | A | 234 | 2111   | 1786   | 2087   | 26   | 22    | 44  | C |
| ATOM   | 1441 | CG  | TRP | A | 234 | -3.372 | 20.341 | 19.255 | 1.00 | 17.12 |     | C |
| ANISOU | 1441 | CG  | TRP | A | 234 | 2309   | 1938   | 2258   | 45   | 2     | 36  | C |
| ATOM   | 1442 | CD1 | TRP | A | 234 | -3.363 | 21.346 | 20.181 | 1.00 | 18.28 |     | C |
| ANISOU | 1442 | CD1 | TRP | A | 234 | 2511   | 2038   | 2396   | 63   | -39   | 33  | C |
| ATOM   | 1443 | NE1 | TRP | A | 234 | -4.304 | 22.292 | 19.858 | 1.00 | 15.07 |     | N |
| ANISOU | 1443 | NE1 | TRP | A | 234 | 2114   | 1624   | 1989   | 83   | -52   | 23  | N |
| ATOM   | 1444 | CE2 | TRP | A | 234 | -4.943 | 21.909 | 18.707 | 1.00 | 18.60 |     | C |
| ANISOU | 1444 | CE2 | TRP | A | 234 | 2509   | 2113   | 2445   | 77   | -19   | 20  | C |
| ATOM   | 1445 | CD2 | TRP | A | 234 | -4.377 | 20.684 | 18.294 | 1.00 | 18.24 |     | C |
| ANISOU | 1445 | CD2 | TRP | A | 234 | 2424   | 2103   | 2405   | 54   | 14    | 28  | C |
| ATOM   | 1446 | CE3 | TRP | A | 234 | -4.861 | 20.074 | 17.127 | 1.00 | 16.69 |     | C |
| ANISOU | 1446 | CE3 | TRP | A | 234 | 2175   | 1949   | 2216   | 49   | 44    | 24  | C |
| ATOM   | 1447 | CZ3 | TRP | A | 234 | -5.878 | 20.701 | 16.417 | 1.00 | 18.45 |     | C |
| ANISOU | 1447 | CZ3 | TRP | A | 234 | 2387   | 2181   | 2442   | 65   | 42    | 14  | C |
| ATOM   | 1448 | CH2 | TRP | A | 234 | -6.410 | 21.925 | 16.850 | 1.00 | 19.32 |     | C |
| ANISOU | 1448 | CH2 | TRP | A | 234 | 2536   | 2258   | 2548   | 86   | 11    | 7   | C |
| ATOM   | 1449 | CZ2 | TRP | A | 234 | -5.965 | 22.535 | 17.994 | 1.00 | 21.23 |     | C |
| ANISOU | 1449 | CZ2 | TRP | A | 234 | 2830   | 2455   | 2781   | 94   | -20   | 10  | C |
| ATOM   | 1450 | C   | TRP | A | 234 | -0.097 | 18.335 | 19.081 | 1.00 | 17.90 |     | C |
| ANISOU | 1450 | C   | TRP | A | 234 | 2354   | 2076   | 2372   | -16  | -6    | 85  | C |

|        |      |     |     |   |     |       |        |        |      |       |     |   |
|--------|------|-----|-----|---|-----|-------|--------|--------|------|-------|-----|---|
| ATOM   | 1451 | O   | TRP | A | 234 | 0.260 | 17.942 | 20.192 | 1.00 | 15.17 |     | O |
| ANISOU | 1451 | O   | TRP | A | 234 | 2043  | 1703   | 2018   | -8   | -10   | 74  | O |
| ATOM   | 1452 | N   | PHE | A | 235 | 0.300 | 17.747 | 17.956 | 1.00 | 15.76 |     | N |
| ANISOU | 1452 | N   | PHE | A | 235 | 2029  | 1853   | 2106   | -29  | 11    | 98  | N |
| ATOM   | 1453 | CA  | PHE | A | 235 | 1.253 | 16.638 | 18.007 | 1.00 | 14.66 |     | C |
| ANISOU | 1453 | CA  | PHE | A | 235 | 1868  | 1735   | 1966   | -35  | 21    | 99  | C |
| ATOM   | 1454 | CB  | PHE | A | 235 | 1.277 | 15.836 | 16.705 | 1.00 | 14.37 |     | C |
| ANISOU | 1454 | CB  | PHE | A | 235 | 1778  | 1756   | 1927   | -33  | 50    | 99  | C |
| ATOM   | 1455 | CG  | PHE | A | 235 | 2.424 | 14.868 | 16.647 | 1.00 | 10.98 |     | C |
| ANISOU | 1455 | CG  | PHE | A | 235 | 1324  | 1352   | 1495   | -34  | 52    | 105 | C |
| ATOM   | 1456 | CD1 | PHE | A | 235 | 2.448 | 13.768 | 17.487 | 1.00 | 12.23 |     | C |
| ANISOU | 1456 | CD1 | PHE | A | 235 | 1506  | 1492   | 1649   | -21  | 65    | 77  | C |
| ATOM   | 1457 | CE1 | PHE | A | 235 | 3.510 | 12.884 | 17.467 | 1.00 | 15.64 |     | C |
| ANISOU | 1457 | CE1 | PHE | A | 235 | 1919  | 1945   | 2079   | -17  | 62    | 79  | C |
| ATOM   | 1458 | CZ  | PHE | A | 235 | 4.574 | 13.114 | 16.630 | 1.00 | 19.77 |     | C |
| ANISOU | 1458 | CZ  | PHE | A | 235 | 2395  | 2513   | 2605   | -26  | 48    | 109 | C |
| ATOM   | 1459 | CE2 | PHE | A | 235 | 4.574 | 14.227 | 15.800 | 1.00 | 20.50 |     | C |
| ANISOU | 1459 | CE2 | PHE | A | 235 | 2461  | 2627   | 2702   | -43  | 38    | 142 | C |
| ATOM   | 1460 | CD2 | PHE | A | 235 | 3.507 | 15.101 | 15.820 | 1.00 | 18.32 |     | C |
| ANISOU | 1460 | CD2 | PHE | A | 235 | 2210  | 2324   | 2429   | -48  | 38    | 139 | C |
| ATOM   | 1461 | C   | PHE | A | 235 | 2.654 | 17.152 | 18.318 | 1.00 | 15.11 |     | C |
| ANISOU | 1461 | C   | PHE | A | 235 | 1925  | 1781   | 2035   | -57  | -24   | 133 | C |
| ATOM   | 1462 | O   | PHE | A | 235 | 3.242 | 17.896 | 17.521 | 1.00 | 15.21 |     | O |
| ANISOU | 1462 | O   | PHE | A | 235 | 1906  | 1814   | 2060   | -79  | -46   | 170 | O |
| ATOM   | 1463 | N   | LYS | A | 236 | 3.191 | 16.762 | 19.473 | 1.00 | 13.15 |     | N |
| ANISOU | 1463 | N   | LYS | A | 236 | 1711  | 1500   | 1784   | -51  | -38   | 122 | N |
| ATOM   | 1464 | CA  | LYS | A | 236 | 4.441 | 17.342 | 19.960 | 1.00 | 12.55 |     | C |
| ANISOU | 1464 | CA  | LYS | A | 236 | 1641  | 1402   | 1724   | -71  | -90   | 150 | C |
| ATOM   | 1465 | CB  | LYS | A | 236 | 4.280 | 17.816 | 21.416 | 1.00 | 14.67 |     | C |
| ANISOU | 1465 | CB  | LYS | A | 236 | 1982  | 1605   | 1986   | -56  | -123  | 132 | C |
| ATOM   | 1466 | CG  | LYS | A | 236 | 3.210 | 18.901 | 21.602 | 1.00 | 12.46 |     | C |
| ANISOU | 1466 | CG  | LYS | A | 236 | 1741  | 1293   | 1700   | -44  | -134  | 123 | C |
| ATOM   | 1467 | CD  | LYS | A | 236 | 3.510 | 20.145 | 20.770 | 1.00 | 14.52 |     | C |
| ANISOU | 1467 | CD  | LYS | A | 236 | 1979  | 1554   | 1985   | -73  | -175  | 160 | C |
| ATOM   | 1468 | CE  | LYS | A | 236 | 2.441 | 21.229 | 20.964 | 1.00 | 17.40 |     | C |
| ANISOU | 1468 | CE  | LYS | A | 236 | 2386  | 1882   | 2342   | -56  | -192  | 147 | C |
| ATOM   | 1469 | NZ  | LYS | A | 236 | 2.679 | 22.482 | 20.166 | 1.00 | 14.57 |     | N |
| ANISOU | 1469 | NZ  | LYS | A | 236 | 2013  | 1516   | 2008   | -85  | -238  | 186 | N |
| ATOM   | 1470 | C   | LYS | A | 236 | 5.663 | 16.430 | 19.850 | 1.00 | 14.47 |     | C |
| ANISOU | 1470 | C   | LYS | A | 236 | 1849  | 1677   | 1974   | -77  | -91   | 159 | C |
| ATOM   | 1471 | O   | LYS | A | 236 | 6.777 | 16.909 | 19.647 | 1.00 | 17.12 |     | O |
| ANISOU | 1471 | O   | LYS | A | 236 | 2154  | 2021   | 2330   | -102 | -127  | 194 | O |
| ATOM   | 1472 | N   | ALA | A | 237 | 5.461 | 15.123 | 19.992 | 1.00 | 13.59 |     | N |
| ANISOU | 1472 | N   | ALA | A | 237 | 1738  | 1580   | 1846   | -55  | -54   | 130 | N |
| ATOM   | 1473 | CA  | ALA | A | 237 | 6.581 | 14.196 | 20.030 | 1.00 | 12.58 |     | C |
| ANISOU | 1473 | CA  | ALA | A | 237 | 1584  | 1475   | 1720   | -53  | -58   | 131 | C |
| ATOM   | 1474 | CB  | ALA | A | 237 | 7.346 | 14.354 | 21.360 | 1.00 | 13.45 |     | C |
| ANISOU | 1474 | CB  | ALA | A | 237 | 1739  | 1535   | 1836   | -53  | -103  | 130 | C |
| ATOM   | 1475 | C   | ALA | A | 237 | 6.084 | 12.767 | 19.901 | 1.00 | 15.37 |     | C |
| ANISOU | 1475 | C   | ALA | A | 237 | 1939  | 1847   | 2056   | -27  | -15   | 97  | C |
| ATOM   | 1476 | O   | ALA | A | 237 | 4.977 | 12.449 | 20.317 | 1.00 | 13.98 |     | O |
| ANISOU | 1476 | O   | ALA | A | 237 | 1798  | 1645   | 1867   | -14  | 11    | 72  | O |
| ATOM   | 1477 | N   | ILE | A | 238 | 6.907 | 11.907 | 19.320 | 1.00 | 13.08 |     | N |
| ANISOU | 1477 | N   | ILE | A | 238 | 1606  | 1598   | 1764   | -19  | -10   | 98  | N |
| ATOM   | 1478 | CA  | ILE | A | 238 | 6.621 | 10.474 | 19.336 | 1.00 | 13.06 |     | C |
| ANISOU | 1478 | CA  | ILE | A | 238 | 1612  | 1603   | 1748   | 6    | 17    | 64  | C |
| ATOM   | 1479 | CB  | ILE | A | 238 | 6.055 | 9.966  | 17.976 | 1.00 | 14.60 |     | C |
| ANISOU | 1479 | CB  | ILE | A | 238 | 1764  | 1847   | 1936   | 18   | 49    | 54  | C |
| ATOM   | 1480 | CG1 | ILE | A | 238 | 5.643 | 8.490  | 18.074 | 1.00 | 13.83 |     | C |
| ANISOU | 1480 | CG1 | ILE | A | 238 | 1683  | 1741   | 1829   | 43   | 67    | 16  | C |
| ATOM   | 1481 | CD1 | ILE | A | 238 | 4.745 | 8.014  | 16.898 | 1.00 | 12.08 |     | C |
| ANISOU | 1481 | CD1 | ILE | A | 238 | 1435  | 1551   | 1603   | 56   | 93    | -2  | C |
| ATOM   | 1482 | CG2 | ILE | A | 238 | 7.050 | 10.218 | 16.830 | 1.00 | 15.34 |     | C |
| ANISOU | 1482 | CG2 | ILE | A | 238 | 1793  | 2007   | 2029   | 19   | 43    | 81  | C |
| ATOM   | 1483 | C   | ILE | A | 238 | 7.897 | 9.743  | 19.735 | 1.00 | 13.91 |     | C |
| ANISOU | 1483 | C   | ILE | A | 238 | 1713  | 1716   | 1856   | 18   | -7    | 62  | C |
| ATOM   | 1484 | O   | ILE | A | 238 | 8.983 | 10.027 | 19.214 | 1.00 | 16.16 |     | O |
| ANISOU | 1484 | O   | ILE | A | 238 | 1948  | 2041   | 2150   | 12   | -25   | 87  | O |
| ATOM   | 1485 | N   | HIS | A | 239 | 7.765 | 8.842  | 20.702 | 1.00 | 15.39 |     | N |
| ANISOU | 1485 | N   | HIS | A | 239 | 1950  | 1864   | 2035   | 34   | -7    | 36  | N |

|        |      |     |     |   |     |        |        |        |      |       |      |   |
|--------|------|-----|-----|---|-----|--------|--------|--------|------|-------|------|---|
| ATOM   | 1486 | CA  | HIS | A | 239 | 8.900  | 8.118  | 21.254 | 1.00 | 17.47 |      | C |
| ANISOU | 1486 | CA  | HIS | A | 239 | 2219   | 2123   | 2298   | 49   | -34   | 29   | C |
| ATOM   | 1487 | CB  | HIS | A | 239 | 8.974  | 8.326  | 22.776 | 1.00 | 15.19 |      | C |
| ANISOU | 1487 | CB  | HIS | A | 239 | 1998   | 1769   | 2004   | 48   | -60   | 25   | C |
| ATOM   | 1488 | CG  | HIS | A | 239 | 9.301  | 9.732  | 23.183 | 1.00 | 16.75 |      | C |
| ANISOU | 1488 | CG  | HIS | A | 239 | 2202   | 1947   | 2216   | 26   | -94   | 51   | C |
| ATOM   | 1489 | ND1 | HIS | A | 239 | 10.586 | 10.225 | 23.185 | 1.00 | 20.55 |      | N |
| ANISOU | 1489 | ND1 | HIS | A | 239 | 2650   | 2441   | 2718   | 15   | -138  | 73   | N |
| ATOM   | 1490 | CE1 | HIS | A | 239 | 10.575 | 11.488 | 23.567 | 1.00 | 19.66 |      | C |
| ANISOU | 1490 | CE1 | HIS | A | 239 | 2553   | 2297   | 2619   | -7   | -170  | 93   | C |
| ATOM   | 1491 | NE2 | HIS | A | 239 | 9.325  | 11.835 | 23.818 | 1.00 | 18.91 |      | N |
| ANISOU | 1491 | NE2 | HIS | A | 239 | 2503   | 2175   | 2509   | -4   | -145  | 82   | N |
| ATOM   | 1492 | CD2 | HIS | A | 239 | 8.507  | 10.755 | 23.586 | 1.00 | 19.10 |      | C |
| ANISOU | 1492 | CD2 | HIS | A | 239 | 2534   | 2212   | 2512   | 14   | -95   | 57   | C |
| ATOM   | 1493 | C   | HIS | A | 239 | 8.774  | 6.622  | 20.947 | 1.00 | 20.05 |      | C |
| ANISOU | 1493 | C   | HIS | A | 239 | 2546   | 2461   | 2611   | 77   | -16   | -2   | C |
| ATOM   | 1494 | O   | HIS | A | 239 | 7.862  | 5.961  | 21.440 | 1.00 | 18.37 |      | O |
| ANISOU | 1494 | O   | HIS | A | 239 | 2379   | 2212   | 2391   | 82   | 3     | -22  | O |
| ATOM   | 1495 | N   | PHE | A | 240 | 9.688  | 6.102  | 20.132 | 1.00 | 15.65 |      | N |
| ANISOU | 1495 | N   | PHE | A | 240 | 1937   | 1956   | 2053   | 96   | -23   | -3   | N |
| ATOM   | 1496 | CA  | PHE | A | 240 | 9.749  | 4.673  | 19.857 | 1.00 | 15.16 |      | C |
| ANISOU | 1496 | CA  | PHE | A | 240 | 1878   | 1902   | 1979   | 129  | -19   | -36  | C |
| ATOM   | 1497 | CB  | PHE | A | 240 | 10.203 | 4.422  | 18.420 | 1.00 | 15.95 |      | C |
| ANISOU | 1497 | CB  | PHE | A | 240 | 1910   | 2078   | 2071   | 153  | -10   | -37  | C |
| ATOM   | 1498 | CG  | PHE | A | 240 | 9.168  | 4.781  | 17.383 | 1.00 | 16.99 |      | C |
| ANISOU | 1498 | CG  | PHE | A | 240 | 2021   | 2235   | 2200   | 146  | 20    | -35  | C |
| ATOM   | 1499 | CD1 | PHE | A | 240 | 8.266  | 3.833  | 16.936 | 1.00 | 19.48 |      | C |
| ANISOU | 1499 | CD1 | PHE | A | 240 | 2353   | 2541   | 2509   | 164  | 34    | -68  | C |
| ATOM   | 1500 | CE1 | PHE | A | 240 | 7.311  | 4.152  | 15.984 | 1.00 | 17.17 |      | C |
| ANISOU | 1500 | CE1 | PHE | A | 240 | 2040   | 2269   | 2213   | 160  | 56    | -70  | C |
| ATOM   | 1501 | CZ  | PHE | A | 240 | 7.250  | 5.436  | 15.477 | 1.00 | 15.48 |      | C |
| ANISOU | 1501 | CZ  | PHE | A | 240 | 1794   | 2086   | 2002   | 138  | 68    | -37  | C |
| ATOM   | 1502 | CE2 | PHE | A | 240 | 8.143  | 6.395  | 15.907 | 1.00 | 16.18 |      | C |
| ANISOU | 1502 | CE2 | PHE | A | 240 | 1868   | 2182   | 2099   | 117  | 54    | 0    | C |
| ATOM   | 1503 | CD2 | PHE | A | 240 | 9.102  | 6.063  | 16.862 | 1.00 | 17.66 |      | C |
| ANISOU | 1503 | CD2 | PHE | A | 240 | 2071   | 2347   | 2290   | 120  | 30    | 0    | C |
| ATOM   | 1504 | C   | PHE | A | 240 | 10.725 | 4.013  | 20.823 | 1.00 | 18.12 |      | C |
| ANISOU | 1504 | C   | PHE | A | 240 | 2282   | 2250   | 2351   | 147  | -53   | -47  | C |
| ATOM   | 1505 | O   | PHE | A | 240 | 11.864 | 4.463  | 20.957 | 1.00 | 17.49 |      | O |
| ANISOU | 1505 | O   | PHE | A | 240 | 2173   | 2191   | 2281   | 147  | -81   | -29  | O |
| ATOM   | 1506 | N   | ILE | A | 241 | 10.279 | 2.959  | 21.506 | 1.00 | 17.15 |      | N |
| ANISOU | 1506 | N   | ILE | A | 241 | 2217   | 2079   | 2220   | 161  | -54   | -73  | N |
| ATOM   | 1507 | CA  | ILE | A | 241 | 11.161 | 2.214  | 22.401 | 1.00 | 18.37 |      | C |
| ANISOU | 1507 | CA  | ILE | A | 241 | 2406   | 2204   | 2369   | 183  | -88   | -86  | C |
| ATOM   | 1508 | CB  | ILE | A | 241 | 10.716 | 2.309  | 23.881 | 1.00 | 21.50 |      | C |
| ANISOU | 1508 | CB  | ILE | A | 241 | 2882   | 2527   | 2759   | 170  | -94   | -82  | C |
| ATOM   | 1509 | CG1 | ILE | A | 241 | 9.312  | 1.731  | 24.064 | 1.00 | 21.66 |      | C |
| ANISOU | 1509 | CG1 | ILE | A | 241 | 2947   | 2510   | 2772   | 161  | -58   | -91  | C |
| ATOM   | 1510 | CD1 | ILE | A | 241 | 8.789  | 1.823  | 25.495 | 1.00 | 22.79 |      | C |
| ANISOU | 1510 | CD1 | ILE | A | 241 | 3168   | 2590   | 2903   | 151  | -53   | -83  | C |
| ATOM   | 1511 | CG2 | ILE | A | 241 | 10.763 | 3.757  | 24.375 | 1.00 | 17.64 |      | C |
| ANISOU | 1511 | CG2 | ILE | A | 241 | 2397   | 2029   | 2278   | 143  | -101  | -55  | C |
| ATOM   | 1512 | C   | ILE | A | 241 | 11.264 | 0.748  | 21.983 | 1.00 | 19.33 |      | C |
| ANISOU | 1512 | C   | ILE | A | 241 | 2533   | 2331   | 2482   | 220  | -94   | -119 | C |
| ATOM   | 1513 | O   | ILE | A | 241 | 10.315 | 0.175  | 21.443 | 1.00 | 16.67 |      | O |
| ANISOU | 1513 | O   | ILE | A | 241 | 2202   | 1989   | 2143   | 221  | -72   | -134 | O |
| ATOM   | 1514 | N   | HIS | A | 242 | 12.438 | 0.169  | 22.207 | 1.00 | 22.83 |      | N |
| ANISOU | 1514 | N   | HIS | A | 242 | 2971   | 2783   | 2921   | 251  | -130  | -131 | N |
| ATOM   | 1515 | CA  | HIS | A | 242 | 12.674 | -1.262 | 22.002 | 1.00 | 24.31 |      | C |
| ANISOU | 1515 | CA  | HIS | A | 242 | 3175   | 2964   | 3097   | 293  | -149  | -166 | C |
| ATOM   | 1516 | CB  | HIS | A | 242 | 11.777 | -2.104 | 22.923 | 1.00 | 22.48 |      | C |
| ANISOU | 1516 | CB  | HIS | A | 242 | 3027   | 2653   | 2861   | 285  | -148  | -178 | C |
| ATOM   | 1517 | CG  | HIS | A | 242 | 11.917 | -1.789 | 24.383 | 1.00 | 26.13 |      | C |
| ANISOU | 1517 | CG  | HIS | A | 242 | 3551   | 3058   | 3319   | 269  | -161  | -162 | C |
| ATOM   | 1518 | ND1 | HIS | A | 242 | 13.133 | -1.777 | 25.031 | 1.00 | 29.41 |      | N |
| ANISOU | 1518 | ND1 | HIS | A | 242 | 3973   | 3470   | 3731   | 290  | -203  | -164 | N |
| ATOM   | 1519 | CE1 | HIS | A | 242 | 12.950 | -1.473 | 26.305 | 1.00 | 26.58 |      | C |
| ANISOU | 1519 | CE1 | HIS | A | 242 | 3679   | 3055   | 3364   | 274  | -210  | -151 | C |
| ATOM   | 1520 | NE2 | HIS | A | 242 | 11.656 | -1.304 | 26.510 | 1.00 | 23.50 |      | N |
| ANISOU | 1520 | NE2 | HIS | A | 242 | 3322   | 2635   | 2971   | 246  | -169  | -139 | N |

|        |      |     |     |   |     |        |        |        |      |       |      |   |
|--------|------|-----|-----|---|-----|--------|--------|--------|------|-------|------|---|
| ATOM   | 1521 | CD2 | HIS | A | 242 | 10.987 | -1.496 | 25.326 | 1.00 | 24.84 | C    |   |
| ANISOU | 1521 | CD2 | HIS | A | 242 | 3446   | 2841   | 3151   | 239  | -139  | -145 | C |
| ATOM   | 1522 | C   | HIS | A | 242 | 12.468 | -1.726 | 20.561 | 1.00 | 23.69 | C    |   |
| ANISOU | 1522 | C   | HIS | A | 242 | 3046   | 2942   | 3013   | 320  | -134  | -185 | C |
| ATOM   | 1523 | O   | HIS | A | 242 | 12.144 | -2.892 | 20.331 | 1.00 | 20.51 | O    |   |
| ANISOU | 1523 | O   | HIS | A | 242 | 2671   | 2518   | 2604   | 347  | -145  | -217 | O |
| ATOM   | 1524 | N   | GLN | A | 243 | 12.650 | -0.836 | 19.588 | 1.00 | 21.52 | N    |   |
| ANISOU | 1524 | N   | GLN | A | 243 | 2702   | 2735   | 2739   | 314  | -114  | -166 | N |
| ATOM   | 1525 | CA  | GLN | A | 243 | 12.409 | -1.218 | 18.199 | 1.00 | 18.86 | C    |   |
| ANISOU | 1525 | CA  | GLN | A | 243 | 2322   | 2453   | 2389   | 344  | -99   | -184 | C |
| ATOM   | 1526 | CB  | GLN | A | 243 | 12.266 | 0.013  | 17.296 | 1.00 | 21.75 | C    |   |
| ANISOU | 1526 | CB  | GLN | A | 243 | 2627   | 2881   | 2757   | 321  | -67   | -151 | C |
| ATOM   | 1527 | CG  | GLN | A | 243 | 13.581 | 0.674  | 16.880 | 1.00 | 20.94 | C    |   |
| ANISOU | 1527 | CG  | GLN | A | 243 | 2453   | 2853   | 2652   | 332  | -71   | -123 | C |
| ATOM   | 1528 | CD  | GLN | A | 243 | 14.313 | 1.340  | 18.032 | 1.00 | 24.33 | C    |   |
| ANISOU | 1528 | CD  | GLN | A | 243 | 2890   | 3252   | 3102   | 302  | -93   | -97  | C |
| ATOM   | 1529 | OE1 | GLN | A | 243 | 13.716 | 1.678  | 19.061 | 1.00 | 21.17 | O    |   |
| ANISOU | 1529 | OE1 | GLN | A | 243 | 2547   | 2781   | 2714   | 266  | -98   | -91  | O |
| ATOM   | 1530 | NE2 | GLN | A | 243 | 15.616 | 1.537  | 17.862 | 1.00 | 23.78 | N    |   |
| ANISOU | 1530 | NE2 | GLN | A | 243 | 2762   | 3237   | 3036   | 319  | -109  | -80  | N |
| ATOM   | 1531 | C   | GLN | A | 243 | 13.528 | -2.134 | 17.706 | 1.00 | 20.46 | C    |   |
| ANISOU | 1531 | C   | GLN | A | 243 | 2497   | 2702   | 2575   | 406  | -127  | -212 | C |
| ATOM   | 1532 | O   | GLN | A | 243 | 14.687 | -1.949 | 18.072 | 1.00 | 22.25 | O    |   |
| ANISOU | 1532 | O   | GLN | A | 243 | 2697   | 2953   | 2803   | 419  | -146  | -202 | O |
| ATOM   | 1533 | N   | PRO | A | 244 | 13.180 | -3.133 | 16.884 | 1.00 | 22.99 | N    |   |
| ANISOU | 1533 | N   | PRO | A | 244 | 2822   | 3033   | 2880   | 449  | -133  | -250 | N |
| ATOM   | 1534 | CA  | PRO | A | 244 | 14.170 | -4.077 | 16.345 | 1.00 | 23.85 | C    |   |
| ANISOU | 1534 | CA  | PRO | A | 244 | 2908   | 3187   | 2966   | 521  | -162  | -284 | C |
| ATOM   | 1535 | CB  | PRO | A | 244 | 13.307 | -5.239 | 15.845 | 1.00 | 24.38 | C    |   |
| ANISOU | 1535 | CB  | PRO | A | 244 | 3020   | 3219   | 3026   | 550  | -179  | -329 | C |
| ATOM   | 1536 | CG  | PRO | A | 244 | 12.005 | -4.617 | 15.487 | 1.00 | 24.67 | C    |   |
| ANISOU | 1536 | CG  | PRO | A | 244 | 3059   | 3239   | 3075   | 503  | -145  | -313 | C |
| ATOM   | 1537 | CD  | PRO | A | 244 | 11.813 | -3.429 | 16.420 | 1.00 | 22.34 | C    |   |
| ANISOU | 1537 | CD  | PRO | A | 244 | 2768   | 2919   | 2801   | 435  | -119  | -265 | C |
| ATOM   | 1538 | C   | PRO | A | 244 | 14.978 | -3.481 | 15.191 | 1.00 | 26.19 | C    |   |
| ANISOU | 1538 | C   | PRO | A | 244 | 3116   | 3592   | 3242   | 552  | -140  | -268 | C |
| ATOM   | 1539 | O   | PRO | A | 244 | 14.647 | -2.399 | 14.704 | 1.00 | 21.11 | O    |   |
| ANISOU | 1539 | O   | PRO | A | 244 | 2433   | 2984   | 2602   | 516  | -105  | -232 | O |
| ATOM   | 1540 | N   | TRP | A | 245 | 16.020 | -4.185 | 14.750 | 1.00 | 24.42 | N    |   |
| ANISOU | 1540 | N   | TRP | A | 245 | 2861   | 3423   | 2996   | 621  | -162  | -294 | N |
| ATOM   | 1541 | CA  | TRP | A | 245 | 16.901 | -3.670 | 13.699 | 1.00 | 25.61 | C    |   |
| ANISOU | 1541 | CA  | TRP | A | 245 | 2921   | 3687   | 3123   | 656  | -137  | -274 | C |
| ATOM   | 1542 | CB  | TRP | A | 245 | 18.057 | -4.644 | 13.416 | 1.00 | 24.22 | C    |   |
| ANISOU | 1542 | CB  | TRP | A | 245 | 2719   | 3563   | 2921   | 742  | -166  | -310 | C |
| ATOM   | 1543 | CG  | TRP | A | 245 | 17.649 | -5.926 | 12.737 | 1.00 | 25.38 | C    |   |
| ANISOU | 1543 | CG  | TRP | A | 245 | 2905   | 3702   | 3037   | 813  | -192  | -373 | C |
| ATOM   | 1544 | CD1 | TRP | A | 245 | 17.326 | -7.110 | 13.339 | 1.00 | 28.90 | C    |   |
| ANISOU | 1544 | CD1 | TRP | A | 245 | 3430   | 4062   | 3488   | 834  | -240  | -421 | C |
| ATOM   | 1545 | NE1 | TRP | A | 245 | 17.014 | -8.056 | 12.388 | 1.00 | 30.85 | N    |   |
| ANISOU | 1545 | NE1 | TRP | A | 245 | 3695   | 4324   | 3704   | 903  | -260  | -472 | N |
| ATOM   | 1546 | CE2 | TRP | A | 245 | 17.138 | -7.494 | 11.146 | 1.00 | 31.30 | C    |   |
| ANISOU | 1546 | CE2 | TRP | A | 245 | 3683   | 4480   | 3728   | 934  | -222  | -459 | C |
| ATOM   | 1547 | CD2 | TRP | A | 245 | 17.539 | -6.153 | 11.324 | 1.00 | 27.61 | C    |   |
| ANISOU | 1547 | CD2 | TRP | A | 245 | 3153   | 4061   | 3277   | 876  | -176  | -393 | C |
| ATOM   | 1548 | CE3 | TRP | A | 245 | 17.736 | -5.351 | 10.195 | 1.00 | 29.69 | C    |   |
| ANISOU | 1548 | CE3 | TRP | A | 245 | 3341   | 4427   | 3512   | 889  | -129  | -361 | C |
| ATOM   | 1549 | CZ3 | TRP | A | 245 | 17.528 | -5.907 | 8.937  | 1.00 | 32.13 | C    |   |
| ANISOU | 1549 | CZ3 | TRP | A | 245 | 3643   | 4791   | 3774   | 966  | -128  | -398 | C |
| ATOM   | 1550 | CH2 | TRP | A | 245 | 17.131 | -7.244 | 8.793  | 1.00 | 31.82 | C    |   |
| ANISOU | 1550 | CH2 | TRP | A | 245 | 3670   | 4702   | 3719   | 1027 | -179  | -469 | C |
| ATOM   | 1551 | CZ2 | TRP | A | 245 | 16.930 | -8.051 | 9.881  | 1.00 | 33.09 | C    |   |
| ANISOU | 1551 | CZ2 | TRP | A | 245 | 3903   | 4758   | 3913   | 1009 | -227  | -499 | C |
| ATOM   | 1552 | C   | TRP | A | 245 | 16.172 | -3.312 | 12.402 | 1.00 | 21.94 | C    |   |
| ANISOU | 1552 | C   | TRP | A | 245 | 2428   | 3274   | 2635   | 665  | -102  | -269 | C |
| ATOM   | 1553 | O   | TRP | A | 245 | 16.517 | -2.332 | 11.744 | 1.00 | 24.35 | O    |   |
| ANISOU | 1553 | O   | TRP | A | 245 | 2665   | 3655   | 2933   | 652  | -66   | -225 | O |
| ATOM   | 1554 | N   | TYR | A | 246 | 15.159 | -4.089 | 12.036 | 1.00 | 24.28 | N    |   |
| ANISOU | 1554 | N   | TYR | A | 246 | 2777   | 3527   | 2923   | 683  | -115  | -311 | N |
| ATOM   | 1555 | CA  | TYR | A | 246 | 14.469 | -3.846 | 10.766 | 1.00 | 27.99 | C    |   |
| ANISOU | 1555 | CA  | TYR | A | 246 | 3225   | 4044   | 3368   | 701  | -89   | -314 | C |

|        |      |     |     |   |     |        |        |        |      |       |      |   |
|--------|------|-----|-----|---|-----|--------|--------|--------|------|-------|------|---|
| ATOM   | 1556 | CB  | TYR | A | 246 | 13.790 | -5.121 | 10.245 | 1.00 | 28.49 | C    |   |
| ANISOU | 1556 | CB  | TYR | A | 246 | 3340   | 4072   | 3414   | 756  | -125  | -379 | C |
| ATOM   | 1557 | CG  | TYR | A | 246 | 13.104 | -5.932 | 11.314 | 1.00 | 26.26 | C    |   |
| ANISOU | 1557 | CG  | TYR | A | 246 | 3137   | 3673   | 3166   | 725  | -162  | -405 | C |
| ATOM   | 1558 | CD1 | TYR | A | 246 | 11.777 | -5.692 | 11.653 | 1.00 | 23.98 | C    |   |
| ANISOU | 1558 | CD1 | TYR | A | 246 | 2890   | 3312   | 2909   | 661  | -154  | -396 | C |
| ATOM   | 1559 | CE1 | TYR | A | 246 | 11.146 | -6.432 | 12.635 | 1.00 | 24.96 | C    |   |
| ANISOU | 1559 | CE1 | TYR | A | 246 | 3084   | 3334   | 3064   | 630  | -182  | -412 | C |
| ATOM   | 1560 | CZ  | TYR | A | 246 | 11.849 | -7.426 | 13.297 | 1.00 | 30.82 | C    |   |
| ANISOU | 1560 | CZ  | TYR | A | 246 | 3862   | 4041   | 3805   | 663  | -224  | -439 | C |
| ATOM   | 1561 | OH  | TYR | A | 246 | 11.235 | -8.169 | 14.277 | 1.00 | 29.95 | O    |   |
| ANISOU | 1561 | OH  | TYR | A | 246 | 3825   | 3830   | 3725   | 631  | -252  | -448 | O |
| ATOM   | 1562 | CE2 | TYR | A | 246 | 13.171 | -7.682 | 12.975 | 1.00 | 30.72 | C    |   |
| ANISOU | 1562 | CE2 | TYR | A | 246 | 3813   | 4096   | 3762   | 730  | -238  | -453 | C |
| ATOM   | 1563 | CD2 | TYR | A | 246 | 13.788 | -6.937 | 11.992 | 1.00 | 30.06 | C    |   |
| ANISOU | 1563 | CD2 | TYR | A | 246 | 3653   | 4119   | 3648   | 760  | -205  | -436 | C |
| ATOM   | 1564 | C   | TYR | A | 246 | 13.481 | -2.679 | 10.819 | 1.00 | 27.71 | C    |   |
| ANISOU | 1564 | C   | TYR | A | 246 | 3190   | 3984   | 3356   | 624  | -55   | -272 | C |
| ATOM   | 1565 | O   | TYR | A | 246 | 12.771 | -2.419 | 9.852  | 1.00 | 24.10 | O    |   |
| ANISOU | 1565 | O   | TYR | A | 246 | 2721   | 3553   | 2881   | 631  | -37   | -273 | O |
| ATOM   | 1566 | N   | PHE | A | 247 | 13.436 | -1.978 | 11.947 | 1.00 | 22.69 | N    |   |
| ANISOU | 1566 | N   | PHE | A | 247 | 2569   | 3296   | 2755   | 555  | -50   | -237 | N |
| ATOM   | 1567 | CA  | PHE | A | 247 | 12.617 | -0.776 | 12.043 | 1.00 | 24.06 | C    |   |
| ANISOU | 1567 | CA  | PHE | A | 247 | 2741   | 3452   | 2950   | 488  | -21   | -196 | C |
| ATOM   | 1568 | CB  | PHE | A | 247 | 12.634 | -0.226 | 13.467 | 1.00 | 19.01 | C    |   |
| ANISOU | 1568 | CB  | PHE | A | 247 | 2133   | 2744   | 2346   | 426  | -27   | -169 | C |
| ATOM   | 1569 | CG  | PHE | A | 247 | 11.865 | 1.060  | 13.635 | 1.00 | 21.89 | C    |   |
| ANISOU | 1569 | CG  | PHE | A | 247 | 2498   | 3089   | 2731   | 362  | -2    | -129 | C |
| ATOM   | 1570 | CD1 | PHE | A | 247 | 10.488 | 1.044  | 13.802 | 1.00 | 21.87 | C    |   |
| ANISOU | 1570 | CD1 | PHE | A | 247 | 2542   | 3028   | 2741   | 334  | 7     | -142 | C |
| ATOM   | 1571 | CE1 | PHE | A | 247 | 9.777  | 2.226  | 13.964 | 1.00 | 22.63 | C    |   |
| ANISOU | 1571 | CE1 | PHE | A | 247 | 2638   | 3106   | 2853   | 282  | 28    | -109 | C |
| ATOM   | 1572 | CZ  | PHE | A | 247 | 10.440 | 3.433  | 13.966 | 1.00 | 19.69 | C    |   |
| ANISOU | 1572 | CZ  | PHE | A | 247 | 2226   | 2769   | 2487   | 255  | 36    | -61  | C |
| ATOM   | 1573 | CE2 | PHE | A | 247 | 11.818 | 3.463  | 13.807 | 1.00 | 24.43 | C    |   |
| ANISOU | 1573 | CE2 | PHE | A | 247 | 2778   | 3425   | 3080   | 275  | 27    | -44  | C |
| ATOM   | 1574 | CD2 | PHE | A | 247 | 12.523 | 2.280  | 13.645 | 1.00 | 22.41 | C    |   |
| ANISOU | 1574 | CD2 | PHE | A | 247 | 2516   | 3192   | 2806   | 330  | 10    | -78  | C |
| ATOM   | 1575 | C   | PHE | A | 247 | 13.166 | 0.271  | 11.088 | 1.00 | 25.41 | C    |   |
| ANISOU | 1575 | C   | PHE | A | 247 | 2836   | 3715   | 3102   | 489  | 12    | -151 | C |
| ATOM   | 1576 | O   | PHE | A | 247 | 12.444 | 1.156  | 10.627 | 1.00 | 26.25 | O    |   |
| ANISOU | 1576 | O   | PHE | A | 247 | 2932   | 3829   | 3212   | 455  | 37    | -124 | O |
| ATOM   | 1577 | N   | THR | A | 248 | 14.455 | 0.154  | 10.790 | 1.00 | 24.45 | N    |   |
| ANISOU | 1577 | N   | THR | A | 248 | 2659   | 3667   | 2963   | 529  | 12    | -140 | N |
| ATOM   | 1578 | CA  | THR | A | 248 | 15.140 | 1.120  | 9.943  | 1.00 | 24.86 | C    |   |
| ANISOU | 1578 | CA  | THR | A | 248 | 2632   | 3814   | 3000   | 528  | 45    | -87  | C |
| ATOM   | 1579 | CB  | THR | A | 248 | 16.639 | 0.774  | 9.816  | 1.00 | 32.59 | C    |   |
| ANISOU | 1579 | CB  | THR | A | 248 | 3549   | 4870   | 3964   | 577  | 41    | -80  | C |
| ATOM   | 1580 | OG1 | THR | A | 248 | 17.290 | 1.064  | 11.060 | 1.00 | 34.22 | O    |   |
| ANISOU | 1580 | OG1 | THR | A | 248 | 3759   | 5032   | 4212   | 534  | 18    | -60  | O |
| ATOM   | 1581 | CG2 | THR | A | 248 | 17.295 | 1.581  | 8.706  | 1.00 | 35.56 | C    |   |
| ANISOU | 1581 | CG2 | THR | A | 248 | 3837   | 5359   | 4314   | 589  | 82    | -26  | C |
| ATOM   | 1582 | C   | THR | A | 248 | 14.492 | 1.225  | 8.565  | 1.00 | 24.66 | C    |   |
| ANISOU | 1582 | C   | THR | A | 248 | 2591   | 3843   | 2936   | 560  | 72    | -91  | C |
| ATOM   | 1583 | O   | THR | A | 248 | 14.312 | 2.322  | 8.040  | 1.00 | 26.31 | O    |   |
| ANISOU | 1583 | O   | THR | A | 248 | 2766   | 4088   | 3144   | 525  | 102   | -42  | O |
| ATOM   | 1584 | N   | THR | A | 249 | 14.127 | 0.083  | 7.992  | 1.00 | 28.34 | N    |   |
| ANISOU | 1584 | N   | THR | A | 249 | 3086   | 4311   | 3371   | 626  | 56    | -151 | N |
| ATOM   | 1585 | CA  | THR | A | 249 | 13.461 | 0.061  | 6.691  | 1.00 | 31.29 | C    |   |
| ANISOU | 1585 | CA  | THR | A | 249 | 3455   | 4729   | 3705   | 665  | 72    | -165 | C |
| ATOM   | 1586 | CB  | THR | A | 249 | 13.263 | -1.377 | 6.186  | 1.00 | 34.84 | C    |   |
| ANISOU | 1586 | CB  | THR | A | 249 | 3941   | 5173   | 4122   | 749  | 38    | -239 | C |
| ATOM   | 1587 | OG1 | THR | A | 249 | 14.540 | -1.981 | 5.946  | 1.00 | 42.01 | O    |   |
| ANISOU | 1587 | OG1 | THR | A | 249 | 4810   | 6154   | 4998   | 820  | 34    | -251 | O |
| ATOM   | 1588 | CG2 | THR | A | 249 | 12.457 | -1.381 | 4.898  | 1.00 | 39.95 | C    |   |
| ANISOU | 1588 | CG2 | THR | A | 249 | 4593   | 5855   | 4731   | 788  | 46    | -258 | C |
| ATOM   | 1589 | C   | THR | A | 249 | 12.103 | 0.757  | 6.745  | 1.00 | 29.31 | C    |   |
| ANISOU | 1589 | C   | THR | A | 249 | 3240   | 4417   | 3480   | 604  | 79    | -154 | C |
| ATOM   | 1590 | O   | THR | A | 249 | 11.763 | 1.547  | 5.864  | 1.00 | 27.92 | O    |   |
| ANISOU | 1590 | O   | THR | A | 249 | 3038   | 4287   | 3284   | 599  | 107   | -124 | O |



|        |      |     |     |   |     |        |        |        |      |       |      |   |
|--------|------|-----|-----|---|-----|--------|--------|--------|------|-------|------|---|
| ATOM   | 1591 | N   | THR | A | 250 | 11.330 | 0.446  | 7.781  | 1.00 | 23.36 |      | N |
| ANISOU | 1591 | N   | THR | A | 250 | 2546   | 3562   | 2766   | 561  | 56    | -177 | N |
| ATOM   | 1592 | CA  | THR | A | 250 | 10.026 | 1.062  | 7.998  | 1.00 | 21.52 |      | C |
| ANISOU | 1592 | CA  | THR | A | 250 | 2347   | 3268   | 2563   | 503  | 63    | -169 | C |
| ATOM   | 1593 | CB  | THR | A | 250 | 9.367  | 0.507  | 9.282  | 1.00 | 27.12 |      | C |
| ANISOU | 1593 | CB  | THR | A | 250 | 3119   | 3872   | 3314   | 464  | 39    | -194 | C |
| ATOM   | 1594 | OG1 | THR | A | 250 | 9.291  | -0.922 | 9.202  | 1.00 | 32.51 |      | O |
| ANISOU | 1594 | OG1 | THR | A | 250 | 3836   | 4529   | 3988   | 515  | 5     | -252 | O |
| ATOM   | 1595 | CG2 | THR | A | 250 | 7.971  | 1.074  | 9.452  | 1.00 | 26.43 |      | C |
| ANISOU | 1595 | CG2 | THR | A | 250 | 3060   | 3729   | 3254   | 413  | 49    | -188 | C |
| ATOM   | 1596 | C   | THR | A | 250 | 10.150 | 2.583  | 8.122  | 1.00 | 26.80 |      | C |
| ANISOU | 1596 | C   | THR | A | 250 | 2982   | 3956   | 3246   | 443  | 92    | -102 | C |
| ATOM   | 1597 | O   | THR | A | 250 | 9.380  | 3.337  | 7.523  | 1.00 | 24.88 |      | O |
| ANISOU | 1597 | O   | THR | A | 250 | 2733   | 3720   | 2999   | 424  | 109   | -85  | O |
| ATOM   | 1598 | N   | TYR | A | 251 | 11.127 | 3.029  | 8.902  | 1.00 | 22.49 |      | N |
| ANISOU | 1598 | N   | TYR | A | 251 | 2413   | 3414   | 2717   | 415  | 93    | -67  | N |
| ATOM   | 1599 | CA  | TYR | A | 251 | 11.385 | 4.453  | 9.066  | 1.00 | 23.17 |      | C |
| ANISOU | 1599 | CA  | TYR | A | 251 | 2467   | 3514   | 2822   | 358  | 110   | -2   | C |
| ATOM   | 1600 | CB  | TYR | A | 251 | 12.496 | 4.665  | 10.090 | 1.00 | 24.09 |      | C |
| ANISOU | 1600 | CB  | TYR | A | 251 | 2568   | 3620   | 2965   | 333  | 96    | 24   | C |
| ATOM   | 1601 | CG  | TYR | A | 251 | 12.927 | 6.106  | 10.255 | 1.00 | 32.24 |      | C |
| ANISOU | 1601 | CG  | TYR | A | 251 | 3564   | 4665   | 4021   | 275  | 104   | 92   | C |
| ATOM   | 1602 | CD1 | TYR | A | 251 | 12.450 | 6.877  | 11.307 | 1.00 | 33.74 |      | C |
| ANISOU | 1602 | CD1 | TYR | A | 251 | 3794   | 4777   | 4249   | 215  | 88    | 107  | C |
| ATOM   | 1603 | CE1 | TYR | A | 251 | 12.845 | 8.195  | 11.469 | 1.00 | 40.82 |      | C |
| ANISOU | 1603 | CE1 | TYR | A | 251 | 4663   | 5677   | 5171   | 163  | 85    | 167  | C |
| ATOM   | 1604 | CZ  | TYR | A | 251 | 13.732 | 8.758  | 10.569 | 1.00 | 49.24 |      | C |
| ANISOU | 1604 | CZ  | TYR | A | 251 | 5655   | 6827   | 6228   | 164  | 101   | 220  | C |
| ATOM   | 1605 | OH  | TYR | A | 251 | 14.128 | 10.068 | 10.726 | 1.00 | 52.39 |      | O |
| ANISOU | 1605 | OH  | TYR | A | 251 | 6025   | 7222   | 6657   | 107  | 92    | 284  | O |
| ATOM   | 1606 | CE2 | TYR | A | 251 | 14.224 | 8.011  | 9.514  | 1.00 | 43.54 |      | C |
| ANISOU | 1606 | CE2 | TYR | A | 251 | 4887   | 6192   | 5465   | 224  | 126   | 210  | C |
| ATOM   | 1607 | CD2 | TYR | A | 251 | 13.823 | 6.692  | 9.366  | 1.00 | 39.99 |      | C |
| ANISOU | 1607 | CD2 | TYR | A | 251 | 4470   | 5736   | 4986   | 282  | 125   | 143  | C |
| ATOM   | 1608 | C   | TYR | A | 251 | 11.773 | 5.100  | 7.739  | 1.00 | 23.97 |      | C |
| ANISOU | 1608 | C   | TYR | A | 251 | 2507   | 3710   | 2889   | 379  | 140   | 38   | C |
| ATOM   | 1609 | O   | TYR | A | 251 | 11.325 | 6.206  | 7.414  | 1.00 | 21.68 |      | O |
| ANISOU | 1609 | O   | TYR | A | 251 | 2208   | 3424   | 2605   | 339  | 156   | 79   | O |
| ATOM   | 1610 | N   | ASN | A | 252 | 12.613 | 4.410  | 6.977  | 1.00 | 22.33 |      | N |
| ANISOU | 1610 | N   | ASN | A | 252 | 2259   | 3582   | 2642   | 444  | 147   | 27   | N |
| ATOM   | 1611 | CA  | ASN | A | 252 | 13.055 | 4.926  | 5.690  | 1.00 | 27.40 |      | C |
| ANISOU | 1611 | CA  | ASN | A | 252 | 2842   | 4326   | 3243   | 473  | 181   | 67   | C |
| ATOM   | 1612 | CB  | ASN | A | 252 | 14.127 | 4.019  | 5.076  | 1.00 | 27.91 |      | C |
| ANISOU | 1612 | CB  | ASN | A | 252 | 2863   | 4478   | 3263   | 555  | 187   | 49   | C |
| ATOM   | 1613 | CG  | ASN | A | 252 | 15.487 | 4.200  | 5.724  | 1.00 | 30.08 |      | C |
| ANISOU | 1613 | CG  | ASN | A | 252 | 3085   | 4784   | 3561   | 539  | 187   | 87   | C |
| ATOM   | 1614 | OD1 | ASN | A | 252 | 15.726 | 5.176  | 6.438  | 1.00 | 30.68 |      | O |
| ANISOU | 1614 | OD1 | ASN | A | 252 | 3146   | 4829   | 3681   | 465  | 185   | 139  | O |
| ATOM   | 1615 | ND2 | ASN | A | 252 | 16.389 | 3.259  | 5.470  | 1.00 | 33.10 |      | N |
| ANISOU | 1615 | ND2 | ASN | A | 252 | 3438   | 5227   | 3913   | 611  | 184   | 60   | N |
| ATOM   | 1616 | C   | ASN | A | 252 | 11.898 | 5.115  | 4.713  | 1.00 | 27.38 |      | C |
| ANISOU | 1616 | C   | ASN | A | 252 | 2864   | 4327   | 3213   | 488  | 191   | 53   | C |
| ATOM   | 1617 | O   | ASN | A | 252 | 11.918 | 6.032  | 3.896  | 1.00 | 22.96 |      | O |
| ANISOU | 1617 | O   | ASN | A | 252 | 2269   | 3821   | 2633   | 478  | 219   | 104  | O |
| ATOM   | 1618 | N   | VAL | A | 253 | 10.892 | 4.248  | 4.802  | 1.00 | 24.27 |      | N |
| ANISOU | 1618 | N   | VAL | A | 253 | 2528   | 3873   | 2821   | 510  | 167   | -13  | N |
| ATOM   | 1619 | CA  | VAL | A | 253 | 9.724  | 4.337  | 3.925  | 1.00 | 23.48 |      | C |
| ANISOU | 1619 | CA  | VAL | A | 253 | 2454   | 3767   | 2702   | 525  | 169   | -34  | C |
| ATOM   | 1620 | CB  | VAL | A | 253 | 8.823  | 3.081  | 4.050  | 1.00 | 26.63 |      | C |
| ANISOU | 1620 | CB  | VAL | A | 253 | 2910   | 4102   | 3106   | 558  | 133   | -113 | C |
| ATOM   | 1621 | CG1 | VAL | A | 253 | 7.421  | 3.355  | 3.501  | 1.00 | 26.20 |      | C |
| ANISOU | 1621 | CG1 | VAL | A | 253 | 2886   | 4015   | 3056   | 549  | 127   | -131 | C |
| ATOM   | 1622 | CG2 | VAL | A | 253 | 9.464  | 1.892  | 3.348  | 1.00 | 30.23 |      | C |
| ANISOU | 1622 | CG2 | VAL | A | 253 | 3359   | 4613   | 3515   | 649  | 119   | -158 | C |
| ATOM   | 1623 | C   | VAL | A | 253 | 8.899  | 5.602  | 4.194  | 1.00 | 22.31 |      | C |
| ANISOU | 1623 | C   | VAL | A | 253 | 2317   | 3574   | 2586   | 452  | 178   | 6    | C |
| ATOM   | 1624 | O   | VAL | A | 253 | 8.357  | 6.207  | 3.272  | 1.00 | 24.56 |      | O |
| ANISOU | 1624 | O   | VAL | A | 253 | 2595   | 3888   | 2847   | 458  | 191   | 23   | O |
| ATOM   | 1625 | N   | VAL | A | 254 | 8.825  | 6.005  | 5.458  | 1.00 | 18.85 |      | N |
| ANISOU | 1625 | N   | VAL | A | 254 | 1898   | 3065   | 2197   | 388  | 168   | 21   | N |

|        |      |     |     |   |     |        |        |       |      |       |     |   |
|--------|------|-----|-----|---|-----|--------|--------|-------|------|-------|-----|---|
| ATOM   | 1626 | CA  | VAL | A | 254 | 7.999  | 7.134  | 5.865 | 1.00 | 18.42 |     | C |
| ANISOU | 1626 | CA  | VAL | A | 254 | 1864   | 2959   | 2176  | 325  | 170   | 50  | C |
| ATOM   | 1627 | CB  | VAL | A | 254 | 7.558  | 6.965  | 7.337 | 1.00 | 25.63 |     | C |
| ANISOU | 1627 | CB  | VAL | A | 254 | 2824   | 3778   | 3137  | 281  | 150   | 28  | C |
| ATOM   | 1628 | CG1 | VAL | A | 254 | 6.663  | 8.101  | 7.758 | 1.00 | 32.78 |     | C |
| ANISOU | 1628 | CG1 | VAL | A | 254 | 3752   | 4632   | 4072  | 225  | 151   | 52  | C |
| ATOM   | 1629 | CG2 | VAL | A | 254 | 6.848  | 5.634  | 7.520 | 1.00 | 31.80 |     | C |
| ANISOU | 1629 | CG2 | VAL | A | 254 | 3645   | 4515   | 3921  | 313  | 133   | -39 | C |
| ATOM   | 1630 | C   | VAL | A | 254 | 8.744  | 8.462  | 5.720 | 1.00 | 18.42 |     | C |
| ANISOU | 1630 | C   | VAL | A | 254 | 1819   | 2999   | 2179  | 285  | 187   | 126 | C |
| ATOM   | 1631 | O   | VAL | A | 254 | 8.142  | 9.516  | 5.519 | 1.00 | 22.20 |     | O |
| ANISOU | 1631 | O   | VAL | A | 254 | 2305   | 3463   | 2667  | 249  | 191   | 158 | O |
| ATOM   | 1632 | N   | LYS | A | 255 | 10.065 | 8.399  | 5.825 | 1.00 | 22.88 |     | N |
| ANISOU | 1632 | N   | LYS | A | 255 | 2340   | 3614   | 2740  | 291  | 193   | 157 | N |
| ATOM   | 1633 | CA  | LYS | A | 255 | 10.900 | 9.599  | 5.872 | 1.00 | 21.55 |     | C |
| ANISOU | 1633 | CA  | LYS | A | 255 | 2126   | 3476   | 2587  | 244  | 202   | 235 | C |
| ATOM   | 1634 | CB  | LYS | A | 255 | 12.378 | 9.201  | 5.826 | 1.00 | 35.02 |     | C |
| ANISOU | 1634 | CB  | LYS | A | 255 | 3771   | 5251   | 4283  | 268  | 210   | 258 | C |
| ATOM   | 1635 | CG  | LYS | A | 255 | 13.347 | 10.326 | 6.130 | 1.00 | 50.56 |     | C |
| ANISOU | 1635 | CG  | LYS | A | 255 | 5689   | 7238   | 6283  | 210  | 210   | 337 | C |
| ATOM   | 1636 | CD  | LYS | A | 255 | 14.776 | 9.890  | 5.840 | 1.00 | 61.14 |     | C |
| ANISOU | 1636 | CD  | LYS | A | 255 | 6957   | 8666   | 7609  | 243  | 225   | 362 | C |
| ATOM   | 1637 | CE  | LYS | A | 255 | 15.697 | 11.086 | 5.652 | 1.00 | 67.44 |     | C |
| ANISOU | 1637 | CE  | LYS | A | 255 | 7685   | 9509   | 8430  | 189  | 235   | 457 | C |
| ATOM   | 1638 | NZ  | LYS | A | 255 | 16.978 | 10.698 | 4.993 | 1.00 | 70.38 |     | N |
| ANISOU | 1638 | NZ  | LYS | A | 255 | 7971   | 9994   | 8774  | 232  | 264   | 489 | N |
| ATOM   | 1639 | C   | LYS | A | 255 | 10.593 | 10.652 | 4.793 | 1.00 | 22.22 |     | C |
| ANISOU | 1639 | C   | LYS | A | 255 | 2188   | 3604   | 2650  | 232  | 223   | 287 | C |
| ATOM   | 1640 | O   | LYS | A | 255 | 10.479 | 11.832 | 5.104 | 1.00 | 22.96 |     | O |
| ANISOU | 1640 | O   | LYS | A | 255 | 2284   | 3666   | 2774  | 172  | 215   | 335 | O |
| ATOM   | 1641 | N   | PRO | A | 256 | 10.455 | 10.235 | 3.521 | 1.00 | 20.39 |     | N |
| ANISOU | 1641 | N   | PRO | A | 256 | 2037   | 2969   | 2741  | -235 | 549   | 296 | N |
| ATOM   | 1642 | CA  | PRO | A | 256 | 10.274 | 11.250 | 2.468 | 1.00 | 22.40 |     | C |
| ANISOU | 1642 | CA  | PRO | A | 256 | 2380   | 3193   | 2937  | -281 | 579   | 320 | C |
| ATOM   | 1643 | CB  | PRO | A | 256 | 10.235 | 10.417 | 1.180 | 1.00 | 24.11 |     | C |
| ANISOU | 1643 | CB  | PRO | A | 256 | 2590   | 3445   | 3123  | -197 | 638   | 307 | C |
| ATOM   | 1644 | CG  | PRO | A | 256 | 10.954 | 9.159  | 1.520 | 1.00 | 19.68 |     | C |
| ANISOU | 1644 | CG  | PRO | A | 256 | 1899   | 2971   | 2609  | -144 | 652   | 291 | C |
| ATOM   | 1645 | CD  | PRO | A | 256 | 10.583 | 8.880  | 2.956 | 1.00 | 16.89 |     | C |
| ANISOU | 1645 | CD  | PRO | A | 256 | 1528   | 2582   | 2307  | -137 | 582   | 270 | C |
| ATOM   | 1646 | C   | PRO | A | 256 | 8.980  | 12.047 | 2.614 | 1.00 | 18.98 |     | C |
| ANISOU | 1646 | C   | PRO | A | 256 | 2079   | 2647   | 2484  | -283 | 522   | 298 | C |
| ATOM   | 1647 | O   | PRO | A | 256 | 8.854  | 13.134 | 2.052 | 1.00 | 24.00 |     | O |
| ANISOU | 1647 | O   | PRO | A | 256 | 2801   | 3242   | 3076  | -343 | 520   | 320 | O |
| ATOM   | 1648 | N   | PHE | A | 257 | 8.029  | 11.505 | 3.365 | 1.00 | 18.80 |     | N |
| ANISOU | 1648 | N   | PHE | A | 257 | 2073   | 2575   | 2494  | -219 | 475   | 253 | N |
| ATOM   | 1649 | CA  | PHE | A | 257 | 6.729  | 12.143 | 3.531 | 1.00 | 20.24 |     | C |
| ANISOU | 1649 | CA  | PHE | A | 257 | 2369   | 2653   | 2669  | -210 | 421   | 215 | C |
| ATOM   | 1650 | CB  | PHE | A | 257 | 5.628  | 11.081 | 3.609 | 1.00 | 22.91 |     | C |
| ANISOU | 1650 | CB  | PHE | A | 257 | 2717   | 2950   | 3039  | -99  | 409   | 156 | C |
| ATOM   | 1651 | CG  | PHE | A | 257 | 5.554  | 10.214 | 2.388 | 1.00 | 19.53 |     | C |
| ANISOU | 1651 | CG  | PHE | A | 257 | 2282   | 2541   | 2598  | -11  | 452   | 144 | C |
| ATOM   | 1652 | CD1 | PHE | A | 257 | 5.123  | 10.742 | 1.183 | 1.00 | 22.77 |     | C |
| ANISOU | 1652 | CD1 | PHE | A | 257 | 2788   | 2902   | 2963  | 5    | 459   | 136 | C |
| ATOM   | 1653 | CE1 | PHE | A | 257 | 5.069  | 9.954  | 0.046 | 1.00 | 25.97 |     | C |
| ANISOU | 1653 | CE1 | PHE | A | 257 | 3193   | 3322   | 3351  | 93   | 496   | 125 | C |
| ATOM   | 1654 | CZ  | PHE | A | 257 | 5.458  | 8.633  | 0.105 | 1.00 | 27.30 |     | C |
| ANISOU | 1654 | CZ  | PHE | A | 257 | 3259   | 3561   | 3553  | 165  | 521   | 121 | C |
| ATOM   | 1655 | CE2 | PHE | A | 257 | 5.900  | 8.097  | 1.300 | 1.00 | 26.51 |     | C |
| ANISOU | 1655 | CE2 | PHE | A | 257 | 3063   | 3511   | 3499  | 146  | 510   | 127 | C |
| ATOM   | 1656 | CD2 | PHE | A | 257 | 5.951  | 8.891  | 2.433 | 1.00 | 27.11 |     | C |
| ANISOU | 1656 | CD2 | PHE | A | 257 | 3146   | 3567   | 3587  | 59   | 477   | 140 | C |
| ATOM   | 1657 | C   | PHE | A | 257 | 6.666  | 13.069 | 4.742 | 1.00 | 25.30 |     | C |
| ANISOU | 1657 | C   | PHE | A | 257 | 3030   | 3259   | 3324  | -287 | 362   | 221 | C |
| ATOM   | 1658 | O   | PHE | A | 257 | 5.655  | 13.728 | 4.966 | 1.00 | 26.26 |     | O |
| ANISOU | 1658 | O   | PHE | A | 257 | 3240   | 3297   | 3440  | -289 | 311   | 186 | O |
| ATOM   | 1659 | N   | LEU | A | 258 | 7.753  | 13.123 | 5.508 | 1.00 | 24.39 |     | N |
| ANISOU | 1659 | N   | LEU | A | 258 | 2831   | 3205   | 3230  | -345 | 363   | 260 | N |
| ATOM   | 1660 | CA  | LEU | A | 258 | 7.799  | 13.926 | 6.730 | 1.00 | 24.09 |     | C |
| ANISOU | 1660 | CA  | LEU | A | 258 | 2806   | 3139   | 3210  | -409 | 301   | 267 | C |

|        |      |     |     |   |     |        |        |        |       |       |     |   |
|--------|------|-----|-----|---|-----|--------|--------|--------|-------|-------|-----|---|
| ATOM   | 1661 | CB  | LEU | A | 258 | 8.596  | 13.187 | 7.809  | 1.00  | 23.12 |     | C |
| ANISOU | 1661 | CB  | LEU | A | 258 | 2583   | 3070   | 3130   | -405  | 296   | 276 | C |
| ATOM   | 1662 | CG  | LEU | A | 258 | 8.122  | 11.774 | 8.141  | 1.00  | 31.87 |     | C |
| ANISOU | 1662 | CG  | LEU | A | 258 | 3658   | 4188   | 4263   | -311  | 308   | 237 | C |
| ATOM   | 1663 | CD1 | LEU | A | 258 | 9.032  | 11.121 | 9.178  | 1.00  | 34.32 |     | C |
| ANISOU | 1663 | CD1 | LEU | A | 258 | 3882   | 4547   | 4610   | -315  | 291   | 248 | C |
| ATOM   | 1664 | CD2 | LEU | A | 258 | 6.690  | 11.810 | 8.625  | 1.00  | 25.31 |     | C |
| ANISOU | 1664 | CD2 | LEU | A | 258 | 2910   | 3276   | 3432   | -271  | 274   | 188 | C |
| ATOM   | 1665 | C   | LEU | A | 258 | 8.427  | 15.297 | 6.504  | 1.00  | 24.03 |     | C |
| ANISOU | 1665 | C   | LEU | A | 258 | 2828   | 3126   | 3178   | -514  | 284   | 314 | C |
| ATOM   | 1666 | O   | LEU | A | 258 | 9.567  | 15.397 | 6.064  | 1.00  | 23.13 |     | O |
| ANISOU | 1666 | O   | LEU | A | 258 | 2650   | 3074   | 3063   | -564  | 326   | 360 | O |
| ATOM   | 1667 | N   | LYS | A | 259 | 7.686  | 16.354 | 6.813  | 1.00  | 18.79 |     | N |
| ANISOU | 1667 | N   | LYS | A | 259 | 2257   | 2386   | 2498   | -549  | 219   | 299 | N |
| ATOM   | 1668 | CA  | LYS | A | 259 | 8.271  | 17.689 | 6.838  | 1.00  | 25.66 |     | C |
| ANISOU | 1668 | CA  | LYS | A | 259 | 3154   | 3243   | 3353   | -653  | 181   | 344 | C |
| ATOM   | 1669 | CB  | LYS | A | 259 | 7.188  | 18.745 | 7.068  | 1.00  | 30.37 |     | C |
| ANISOU | 1669 | CB  | LYS | A | 259 | 3867   | 3745   | 3927   | -670  | 98    | 309 | C |
| ATOM   | 1670 | CG  | LYS | A | 259 | 6.118  | 18.725 | 5.985  | 1.00  | 39.04 |     | C |
| ANISOU | 1670 | CG  | LYS | A | 259 | 5063   | 4782   | 4988   | -619  | 104   | 265 | C |
| ATOM   | 1671 | CD  | LYS | A | 259 | 5.297  | 19.997 | 5.952  | 1.00  | 48.85 |     | C |
| ANISOU | 1671 | CD  | LYS | A | 259 | 6425   | 5932   | 6205   | -656  | 15    | 236 | C |
| ATOM   | 1672 | CE  | LYS | A | 259 | 4.132  | 19.939 | 6.918  | 1.00  | 52.41 |     | C |
| ANISOU | 1672 | CE  | LYS | A | 259 | 6904   | 6325   | 6683   | -605  | -46   | 159 | C |
| ATOM   | 1673 | NZ  | LYS | A | 259 | 3.036  | 20.881 | 6.529  | 1.00  | 51.65 |     | N |
| ANISOU | 1673 | NZ  | LYS | A | 259 | 6932   | 6129   | 6564   | -606  | -125  | 101 | N |
| ATOM   | 1674 | C   | LYS | A | 259 | 9.326  | 17.746 | 7.935  | 1.00  | 25.55 |     | C |
| ANISOU | 1674 | C   | LYS | A | 259 | 3050   | 3276   | 3384   | -700  | 161   | 378 | C |
| ATOM   | 1675 | O   | LYS | A | 259 | 9.261  | 16.989 | 8.904  | 1.00  | 20.70 |     | O |
| ANISOU | 1675 | O   | LYS | A | 259 | 2389   | 2674   | 2803   | -653  | 148   | 353 | O |
| ATOM   | 1676 | N   | SER | A | 260 | 10.300 | 18.640 | 7.781  | 1.00  | 26.70 |     | N |
| ANISOU | 1676 | N   | SER | A | 260 | 3173   | 3440   | 3531   | -793  | 155   | 433 | N |
| ATOM   | 1677 | CA  | SER | A | 260 | 11.421 | 18.718 | 8.715  | 1.00  | 30.81 |     | C |
| ANISOU | 1677 | CA  | SER | A | 260 | 3600   | 4001   | 4106   | -838  | 133   | 463 | C |
| ATOM   | 1678 | CB  | SER | A | 260 | 12.427 | 19.776 | 8.252  | 1.00  | 37.17 |     | C |
| ANISOU | 1678 | CB  | SER | A | 260 | 4388   | 4822   | 4915   | -947  | 137   | 525 | C |
| ATOM   | 1679 | OG  | SER | A | 260 | 11.891 | 21.077 | 8.407  | 1.00  | 41.12 |     | O |
| ANISOU | 1679 | OG  | SER | A | 260 | 4987   | 5247   | 5389   | -1002 | 56    | 534 | O |
| ATOM   | 1680 | C   | SER | A | 260 | 10.974 | 18.999 | 10.154 | 1.00  | 28.06 |     | C |
| ANISOU | 1680 | C   | SER | A | 260 | 3277   | 3603   | 3779   | -826  | 41    | 437 | C |
| ATOM   | 1681 | O   | SER | A | 260 | 11.564 | 18.485 | 11.105 | 1.00  | 25.28 |     | O |
| ANISOU | 1681 | O   | SER | A | 260 | 2856   | 3278   | 3472   | -810  | 25    | 436 | O |
| ATOM   | 1682 | N   | LYS | A | 261 | 9.933  | 19.812 | 10.308 | 1.00  | 29.26 |     | N |
| ANISOU | 1682 | N   | LYS | A | 261 | 3534   | 3682   | 3900   | -830  | -21   | 412 | N |
| ATOM   | 1683 | CA  | LYS | A | 261 | 9.397  | 20.138 | 11.628 | 1.00  | 31.81 |     | C |
| ANISOU | 1683 | CA  | LYS | A | 261 | 3892   | 3959   | 4236   | -815  | -105  | 381 | C |
| ATOM   | 1684 | CB  | LYS | A | 261 | 8.242  | 21.133 | 11.507 | 1.00  | 41.50 |     | C |
| ANISOU | 1684 | CB  | LYS | A | 261 | 5234   | 5108   | 5424   | -824  | -171  | 346 | C |
| ATOM   | 1685 | CG  | LYS | A | 261 | 8.603  | 22.452 | 10.858 | 1.00  | 55.24 |     | C |
| ANISOU | 1685 | CG  | LYS | A | 261 | 7021   | 6823   | 7145   | -914  | -214  | 389 | C |
| ATOM   | 1686 | CD  | LYS | A | 261 | 7.351  | 23.283 | 10.606 | 1.00  | 63.51 |     | C |
| ANISOU | 1686 | CD  | LYS | A | 261 | 8189   | 7788   | 8153   | -909  | -282  | 339 | C |
| ATOM   | 1687 | CE  | LYS | A | 261 | 6.281  | 22.461 | 9.897  | 1.00  | 64.98 |     | C |
| ANISOU | 1687 | CE  | LYS | A | 261 | 8416   | 7955   | 8317   | -828  | -229  | 280 | C |
| ATOM   | 1688 | NZ  | LYS | A | 261 | 5.006  | 23.213 | 9.749  | 1.00  | 65.69 |     | N |
| ANISOU | 1688 | NZ  | LYS | A | 261 | 8619   | 7958   | 8381   | -814  | -304  | 213 | N |
| ATOM   | 1689 | C   | LYS | A | 261 | 8.905  | 18.886 | 12.348 | 1.00  | 29.21 |     | C |
| ANISOU | 1689 | C   | LYS | A | 261 | 3539   | 3641   | 3920   | -727  | -81   | 336 | C |
| ATOM   | 1690 | O   | LYS | A | 261 | 9.042  | 18.759 | 13.567 | 1.00  | 28.82 |     | O |
| ANISOU | 1690 | O   | LYS | A | 261 | 3474   | 3584   | 3891   | -715  | -125  | 327 | O |
| ATOM   | 1691 | N   | LEU | A | 262 | 8.326  | 17.966 | 11.582 | 1.00  | 24.36 |     | N |
| ANISOU | 1691 | N   | LEU | A | 262 | 2927   | 3039   | 3291   | -665  | -14   | 308 | N |
| ATOM   | 1692 | CA  | LEU | A | 262 | 7.801  | 16.717 | 12.124 | 1.00  | 21.48 |     | C |
| ANISOU | 1692 | CA  | LEU | A | 262 | 2543   | 2682   | 2939   | -583  | 14    | 267 | C |
| ATOM   | 1693 | CB  | LEU | A | 262 | 6.801  | 16.103 | 11.136 | 1.00  | 26.32 |     | C |
| ANISOU | 1693 | CB  | LEU | A | 262 | 3191   | 3277   | 3533   | -519  | 65    | 227 | C |
| ATOM   | 1694 | CG  | LEU | A | 262 | 6.392  | 14.641 | 11.332 | 1.00  | 40.31 |     | C |
| ANISOU | 1694 | CG  | LEU | A | 262 | 4927   | 5066   | 5323   | -434  | 109   | 194 | C |
| ATOM   | 1695 | CD1 | LEU | A | 262 | 5.850  | 14.396 | 12.728 | 1.00  | 39.09 |     | C |
| ANISOU | 1695 | CD1 | LEU | A | 262 | 4792   | 4881   | 5178   | -413  | 75    | 162 | C |

|        |      |     |     |   |     |        |        |        |       |       |     |   |
|--------|------|-----|-----|---|-----|--------|--------|--------|-------|-------|-----|---|
| ATOM   | 1696 | CD2 | LEU | A | 262 | 5.365  | 14.243 | 10.284 | 1.00  | 48.26 |     | C |
| ANISOU | 1696 | CD2 | LEU | A | 262 | 5976   | 6042   | 6318   | -373  | 145   | 153 | C |
| ATOM   | 1697 | C   | LEU | A | 262 | 8.914  | 15.721 | 12.438 | 1.00  | 23.33 |     | C |
| ANISOU | 1697 | C   | LEU | A | 262 | 2675   | 2983   | 3207   | -569  | 46    | 292 | C |
| ATOM   | 1698 | O   | LEU | A | 262 | 8.877  | 15.035 | 13.462 | 1.00  | 21.18 |     | O |
| ANISOU | 1698 | O   | LEU | A | 262 | 2388   | 2710   | 2951   | -532  | 30    | 273 | O |
| ATOM   | 1699 | N   | LEU | A | 263 | 9.905  | 15.641 | 11.556 | 1.00  | 21.42 |     | N |
| ANISOU | 1699 | N   | LEU | A | 263 | 2367   | 2798   | 2974   | -598  | 91    | 330 | N |
| ATOM   | 1700 | CA  | LEU | A | 263 | 11.049 | 14.770 | 11.787 | 1.00  | 24.95 |     | C |
| ANISOU | 1700 | CA  | LEU | A | 263 | 2708   | 3310   | 3461   | -587  | 115   | 344 | C |
| ATOM   | 1701 | CB  | LEU | A | 263 | 12.057 | 14.865 | 10.638 | 1.00  | 29.22 |     | C |
| ANISOU | 1701 | CB  | LEU | A | 263 | 3179   | 3914   | 4008   | -628  | 175   | 381 | C |
| ATOM   | 1702 | CG  | LEU | A | 263 | 11.880 | 13.818 | 9.536  | 1.00  | 42.14 |     | C |
| ANISOU | 1702 | CG  | LEU | A | 263 | 4788   | 5596   | 5628   | -564  | 252   | 365 | C |
| ATOM   | 1703 | CD1 | LEU | A | 263 | 12.699 | 14.174 | 8.299  | 1.00  | 45.15 |     | C |
| ANISOU | 1703 | CD1 | LEU | A | 263 | 5127   | 6031   | 5997   | -614  | 317   | 401 | C |
| ATOM   | 1704 | CD2 | LEU | A | 263 | 12.244 | 12.430 | 10.053 | 1.00  | 44.16 |     | C |
| ANISOU | 1704 | CD2 | LEU | A | 263 | 4965   | 5894   | 5918   | -496  | 257   | 338 | C |
| ATOM   | 1705 | C   | LEU | A | 263 | 11.733 | 15.101 | 13.102 | 1.00  | 22.51 |     | C |
| ANISOU | 1705 | C   | LEU | A | 263 | 2376   | 2990   | 3188   | -619  | 45    | 355 | C |
| ATOM   | 1706 | O   | LEU | A | 263 | 12.184 | 14.207 | 13.818 | 1.00  | 21.11 |     | O |
| ANISOU | 1706 | O   | LEU | A | 263 | 2149   | 2832   | 3039   | -582  | 33    | 341 | O |
| ATOM   | 1707 | N   | GLU | A | 264 | 11.813 | 16.391 | 13.412 | 1.00  | 20.15 |     | N |
| ANISOU | 1707 | N   | GLU | A | 264 | 2117   | 2652   | 2886   | -685  | -11   | 378 | N |
| ATOM   | 1708 | CA  | GLU | A | 264 | 12.422 | 16.846 | 14.658 | 1.00  | 20.54 |     | C |
| ANISOU | 1708 | CA  | GLU | A | 264 | 2154   | 2679   | 2970   | -713  | -90   | 388 | C |
| ATOM   | 1709 | CB  | GLU | A | 264 | 12.488 | 18.377 | 14.688 | 1.00  | 23.72 |     | C |
| ANISOU | 1709 | CB  | GLU | A | 264 | 2601   | 3042   | 3369   | -790  | -150  | 418 | C |
| ATOM   | 1710 | CG  | GLU | A | 264 | 13.441 | 18.974 | 13.673 | 1.00  | 35.55 |     | C |
| ANISOU | 1710 | CG  | GLU | A | 264 | 4043   | 4577   | 4887   | -866  | -115  | 466 | C |
| ATOM   | 1711 | CD  | GLU | A | 264 | 13.285 | 20.475 | 13.542 | 1.00  | 44.25 |     | C |
| ANISOU | 1711 | CD  | GLU | A | 264 | 5208   | 5630   | 5973   | -942  | -175  | 496 | C |
| ATOM   | 1712 | OE1 | GLU | A | 264 | 12.528 | 21.073 | 14.340 | 1.00  | 42.41 |     | O |
| ANISOU | 1712 | OE1 | GLU | A | 264 | 5054   | 5339   | 5723   | -931  | -254  | 475 | O |
| ATOM   | 1713 | OE2 | GLU | A | 264 | 13.917 | 21.055 | 12.635 | 1.00  | 51.81 |     | O |
| ANISOU | 1713 | OE2 | GLU | A | 264 | 6139   | 6609   | 6935   | -1013 | -142  | 538 | O |
| ATOM   | 1714 | C   | GLU | A | 264 | 11.690 | 16.352 | 15.904 | 1.00  | 22.53 |     | C |
| ANISOU | 1714 | C   | GLU | A | 264 | 2461   | 2889   | 3209   | -654  | -133  | 349 | C |
| ATOM   | 1715 | O   | GLU | A | 264 | 12.213 | 16.443 | 17.017 | 1.00  | 21.27 |     | O |
| ANISOU | 1715 | O   | GLU | A | 264 | 2295   | 2711   | 3075   | -657  | -197  | 351 | O |
| ATOM   | 1716 | N   | ARG | A | 265 | 10.476 | 15.846 | 15.719 | 1.00  | 19.28 |     | N |
| ANISOU | 1716 | N   | ARG | A | 265 | 2107   | 2458   | 2759   | -601  | -99   | 312 | N |
| ATOM   | 1717 | CA  | ARG | A | 265 | 9.655  | 15.415 | 16.846 | 1.00  | 20.60 |     | C |
| ANISOU | 1717 | CA  | ARG | A | 265 | 2334   | 2585   | 2909   | -553  | -125  | 275 | C |
| ATOM   | 1718 | CB  | ARG | A | 265 | 8.224  | 15.936 | 16.687 | 1.00  | 20.40 |     | C |
| ANISOU | 1718 | CB  | ARG | A | 265 | 2396   | 2509   | 2845   | -541  | -124  | 238 | C |
| ATOM   | 1719 | CG  | ARG | A | 265 | 8.136  | 17.469 | 16.618 | 1.00  | 23.23 |     | C |
| ANISOU | 1719 | CG  | ARG | A | 265 | 2802   | 2832   | 3192   | -603  | -186  | 250 | C |
| ATOM   | 1720 | CD  | ARG | A | 265 | 6.686  | 17.928 | 16.560 | 1.00  | 24.87 |     | C |
| ANISOU | 1720 | CD  | ARG | A | 265 | 3096   | 2987   | 3367   | -584  | -197  | 197 | C |
| ATOM   | 1721 | NE  | ARG | A | 265 | 6.514  | 19.385 | 16.614 | 1.00  | 34.51 |     | N |
| ANISOU | 1721 | NE  | ARG | A | 265 | 4371   | 4167   | 4576   | -637  | -274  | 198 | N |
| ATOM   | 1722 | CZ  | ARG | A | 265 | 6.644  | 20.145 | 17.705 | 1.00  | 34.36 |     | C |
| ANISOU | 1722 | CZ  | ARG | A | 265 | 4381   | 4120   | 4556   | -658  | -356  | 199 | C |
| ATOM   | 1723 | NH1 | ARG | A | 265 | 6.992  | 19.619 | 18.882 | 1.00  | 20.37 |     | N |
| ANISOU | 1723 | NH1 | ARG | A | 265 | 2595   | 2353   | 2791   | -632  | -369  | 200 | N |
| ATOM   | 1724 | NH2 | ARG | A | 265 | 6.431  | 21.454 | 17.610 | 1.00  | 30.34 |     | N |
| ANISOU | 1724 | NH2 | ARG | A | 265 | 3920   | 3573   | 4034   | -703  | -431  | 197 | N |
| ATOM   | 1725 | C   | ARG | A | 265 | 9.650  | 13.897 | 16.998 | 1.00  | 21.35 |     | C |
| ANISOU | 1725 | C   | ARG | A | 265 | 2394   | 2706   | 3011   | -487  | -82   | 255 | C |
| ATOM   | 1726 | O   | ARG | A | 265 | 8.924  | 13.359 | 17.835 | 1.00  | 20.05 |     | O |
| ANISOU | 1726 | O   | ARG | A | 265 | 2281   | 2511   | 2828   | -446  | -87   | 225 | O |
| ATOM   | 1727 | N   | VAL | A | 266 | 10.461 | 13.213 | 16.191 | 1.00  | 19.92 |     | N |
| ANISOU | 1727 | N   | VAL | A | 266 | 2129   | 2584   | 2856   | -480  | -39   | 271 | N |
| ATOM   | 1728 | CA  | VAL | A | 266 | 10.552 | 11.754 | 16.242 | 1.00  | 18.76 |     | C |
| ANISOU | 1728 | CA  | VAL | A | 266 | 1942   | 2466   | 2719   | -416  | -9    | 252 | C |
| ATOM   | 1729 | CB  | VAL | A | 266 | 10.617 | 11.151 | 14.829 | 1.00  | 20.78 |     | C |
| ANISOU | 1729 | CB  | VAL | A | 266 | 2141   | 2775   | 2978   | -391  | 62    | 253 | C |
| ATOM   | 1730 | CG1 | VAL | A | 266 | 10.677 | 9.621  | 14.913 | 1.00  | 17.04 |     | C |
| ANISOU | 1730 | CG1 | VAL | A | 266 | 1629   | 2329   | 2518   | -320  | 79    | 230 | C |

|        |      |     |     |   |     |        |        |        |      |       |     |   |
|--------|------|-----|-----|---|-----|--------|--------|--------|------|-------|-----|---|
| ATOM   | 1731 | CG2 | VAL | A | 266 | 9.426  | 11.608 | 14.000 | 1.00 | 15.60 |     | C |
| ANISOU | 1731 | CG2 | VAL | A | 266 | 1549   | 2088   | 2288   | -383 | 98    | 239 | C |
| ATOM   | 1732 | C   | VAL | A | 266 | 11.793 | 11.302 | 17.005 | 1.00 | 21.39 |     | C |
| ANISOU | 1732 | C   | VAL | A | 266 | 2216   | 2819   | 3091   | -419 | -55   | 259 | C |
| ATOM   | 1733 | O   | VAL | A | 266 | 12.910 | 11.695 | 16.666 | 1.00 | 22.33 |     | O |
| ANISOU | 1733 | O   | VAL | A | 266 | 2262   | 2974   | 3248   | -460 | -64   | 282 | O |
| ATOM   | 1734 | N   | PHE | A | 267 | 11.593 | 10.482 | 18.033 | 1.00 | 19.33 |     | N |
| ANISOU | 1734 | N   | PHE | A | 267 | 1991   | 2532   | 2823   | -376 | -85   | 238 | N |
| ATOM   | 1735 | CA  | PHE | A | 267 | 12.690 | 9.977  | 18.853 | 1.00 | 22.17 |     | C |
| ANISOU | 1735 | CA  | PHE | A | 267 | 2312   | 2895   | 3218   | -369 | -145  | 235 | C |
| ATOM   | 1736 | CB  | PHE | A | 267 | 12.633 | 10.585 | 20.257 | 1.00 | 23.95 |     | C |
| ANISOU | 1736 | CB  | PHE | A | 267 | 2617   | 3054   | 3429   | -384 | -220  | 235 | C |
| ATOM   | 1737 | CG  | PHE | A | 267 | 12.578 | 12.081 | 20.245 | 1.00 | 29.31 |     | C |
| ANISOU | 1737 | CG  | PHE | A | 267 | 3319   | 3711   | 4105   | -442 | -244  | 257 | C |
| ATOM   | 1738 | CD1 | PHE | A | 267 | 13.728 | 12.825 | 20.030 | 1.00 | 33.32 |     | C |
| ANISOU | 1738 | CD1 | PHE | A | 267 | 3757   | 4237   | 4665   | -492 | -280  | 282 | C |
| ATOM   | 1739 | CE1 | PHE | A | 267 | 13.682 | 14.212 | 19.994 | 1.00 | 34.97 |     | C |
| ANISOU | 1739 | CE1 | PHE | A | 267 | 3990   | 4423   | 4875   | -548 | -310  | 306 | C |
| ATOM   | 1740 | CZ  | PHE | A | 267 | 12.475 | 14.862 | 20.160 | 1.00 | 30.73 |     | C |
| ANISOU | 1740 | CZ  | PHE | A | 267 | 3546   | 3846   | 4284   | -550 | -309  | 299 | C |
| ATOM   | 1741 | CE2 | PHE | A | 267 | 11.316 | 14.128 | 20.365 | 1.00 | 28.36 |     | C |
| ANISOU | 1741 | CE2 | PHE | A | 267 | 3309   | 3531   | 3936   | -499 | -269  | 267 | C |
| ATOM   | 1742 | CD2 | PHE | A | 267 | 11.372 | 12.744 | 20.400 | 1.00 | 25.87 |     | C |
| ANISOU | 1742 | CD2 | PHE | A | 267 | 2970   | 3236   | 3622   | -448 | -234  | 250 | C |
| ATOM   | 1743 | C   | PHE | A | 267 | 12.686 | 8.454  | 18.918 | 1.00 | 20.83 |     | C |
| ANISOU | 1743 | C   | PHE | A | 267 | 2123   | 2743   | 3049   | -305 | -134  | 209 | C |
| ATOM   | 1744 | O   | PHE | A | 267 | 11.642 | 7.834  | 19.111 | 1.00 | 16.94 |     | O |
| ANISOU | 1744 | O   | PHE | A | 267 | 1692   | 2225   | 2520   | -266 | -108  | 194 | O |
| ATOM   | 1745 | N   | VAL | A | 268 | 13.862 | 7.861  | 18.748 | 1.00 | 19.34 |     | N |
| ANISOU | 1745 | N   | VAL | A | 268 | 1845   | 2596   | 2908   | -296 | -158  | 201 | N |
| ATOM   | 1746 | CA  | VAL | A | 268 | 13.996 | 6.412  | 18.677 | 1.00 | 21.17 |     | C |
| ANISOU | 1746 | CA  | VAL | A | 268 | 2046   | 2851   | 3147   | -235 | -159  | 174 | C |
| ATOM   | 1747 | CB  | VAL | A | 268 | 14.472 | 5.981  | 17.276 | 1.00 | 25.66 |     | C |
| ANISOU | 1747 | CB  | VAL | A | 268 | 2504   | 3502   | 3745   | -221 | -103  | 170 | C |
| ATOM   | 1748 | CG1 | VAL | A | 268 | 14.576 | 4.477  | 17.184 | 1.00 | 23.18 |     | C |
| ANISOU | 1748 | CG1 | VAL | A | 268 | 2157   | 3211   | 3438   | -152 | -116  | 138 | C |
| ATOM   | 1749 | CG2 | VAL | A | 268 | 13.522 | 6.510  | 16.203 | 1.00 | 24.73 |     | C |
| ANISOU | 1749 | CG2 | VAL | A | 268 | 2406   | 3397   | 3593   | -229 | -21   | 189 | C |
| ATOM   | 1750 | C   | VAL | A | 268 | 15.010 | 5.996  | 19.737 | 1.00 | 25.93 |     | C |
| ANISOU | 1750 | C   | VAL | A | 268 | 2641   | 3429   | 3783   | -226 | -252  | 154 | C |
| ATOM   | 1751 | O   | VAL | A | 268 | 16.161 | 6.421  | 19.690 | 1.00 | 25.76 |     | O |
| ANISOU | 1751 | O   | VAL | A | 268 | 2544   | 3429   | 3816   | -256 | -287  | 152 | O |
| ATOM   | 1752 | N   | HIS | A | 269 | 14.582 | 5.182  | 20.699 | 1.00 | 26.19 |     | N |
| ANISOU | 1752 | N   | HIS | A | 269 | 2756   | 3411   | 3784   | -187 | -293  | 138 | N |
| ATOM   | 1753 | CA  | HIS | A | 269 | 15.375 | 4.962  | 21.911 | 1.00 | 27.39 |     | C |
| ANISOU | 1753 | CA  | HIS | A | 269 | 2942   | 3513   | 3953   | -180 | -394  | 119 | C |
| ATOM   | 1754 | CB  | HIS | A | 269 | 14.509 | 5.182  | 23.156 | 1.00 | 24.31 |     | C |
| ANISOU | 1754 | CB  | HIS | A | 269 | 2697   | 3040   | 3498   | -180 | -418  | 128 | C |
| ATOM   | 1755 | CG  | HIS | A | 269 | 13.976 | 6.573  | 23.283 | 1.00 | 24.72 |     | C |
| ANISOU | 1755 | CG  | HIS | A | 269 | 2793   | 3071   | 3529   | -227 | -395  | 155 | C |
| ATOM   | 1756 | ND1 | HIS | A | 269 | 14.689 | 7.591  | 23.876 | 1.00 | 23.32 |     | N |
| ANISOU | 1756 | ND1 | HIS | A | 269 | 2619   | 2863   | 3377   | -260 | -461  | 163 | N |
| ATOM   | 1757 | CE1 | HIS | A | 269 | 13.980 | 8.704  | 23.843 | 1.00 | 25.89 |     | C |
| ANISOU | 1757 | CE1 | HIS | A | 269 | 2986   | 3175   | 3674   | -295 | -432  | 185 | C |
| ATOM   | 1758 | NE2 | HIS | A | 269 | 12.827 | 8.444  | 23.248 | 1.00 | 26.64 |     | N |
| ANISOU | 1758 | NE2 | HIS | A | 269 | 3104   | 3289   | 3729   | -285 | -348  | 186 | N |
| ATOM   | 1759 | CD2 | HIS | A | 269 | 12.802 | 7.120  | 22.886 | 1.00 | 25.67 |     | C |
| ANISOU | 1759 | CD2 | HIS | A | 269 | 2952   | 3192   | 3608   | -242 | -322  | 169 | C |
| ATOM   | 1760 | C   | HIS | A | 269 | 16.039 | 3.592  | 22.017 | 1.00 | 30.18 |     | C |
| ANISOU | 1760 | C   | HIS | A | 269 | 3258   | 3878   | 4332   | -129 | -447  | 81  | C |
| ATOM   | 1761 | O   | HIS | A | 269 | 16.958 | 3.403  | 22.818 | 1.00 | 29.30 |     | O |
| ANISOU | 1761 | O   | HIS | A | 269 | 3151   | 3731   | 4252   | -122 | -542  | 55  | O |
| ATOM   | 1762 | N   | GLY | A | 270 | 15.565 | 2.630  | 21.241 | 1.00 | 25.99 |     | N |
| ANISOU | 1762 | N   | GLY | A | 270 | 2695   | 3389   | 3789   | -90  | -399  | 73  | N |
| ATOM   | 1763 | CA  | GLY | A | 270 | 16.062 | 1.273  | 21.381 | 1.00 | 24.69 |     | C |
| ANISOU | 1763 | CA  | GLY | A | 270 | 2508   | 3230   | 3643   | -37  | -460  | 35  | C |
| ATOM   | 1764 | C   | GLY | A | 270 | 15.882 | 0.783  | 22.808 | 1.00 | 27.73 |     | C |
| ANISOU | 1764 | C   | GLY | A | 270 | 3023   | 3526   | 3988   | -21  | -541  | 25  | C |
| ATOM   | 1765 | O   | GLY | A | 270 | 14.832 | 0.997  | 23.414 | 1.00 | 24.36 |     | O |
| ANISOU | 1765 | O   | GLY | A | 270 | 2709   | 3046   | 3498   | -32  | -509  | 50  | O |

|        |      |     |     |   |     |        |        |        |      |       |      |   |
|--------|------|-----|-----|---|-----|--------|--------|--------|------|-------|------|---|
| ATOM   | 1766 | N   | ASP | A | 271 | 16.906 | 0.132  | 23.358 | 1.00 | 31.37 |      | N |
| ANISOU | 1766 | N   | ASP | A | 271 | 3471   | 3965   | 4484   | 4    | -646  | -16  | N |
| ATOM   | 1767 | CA  | ASP | A | 271 | 16.785 | -0.474 | 24.684 | 1.00 | 31.60 |      | C |
| ANISOU | 1767 | CA  | ASP | A | 271 | 3637   | 3902   | 4469   | 24   | -733  | -28  | C |
| ATOM   | 1768 | CB  | ASP | A | 271 | 17.470 | -1.847 | 24.729 | 1.00 | 30.44 |      | C |
| ANISOU | 1768 | CB  | ASP | A | 271 | 3463   | 3754   | 4348   | 77   | -825  | -78  | C |
| ATOM   | 1769 | CG  | ASP | A | 271 | 16.695 | -2.917 | 23.979 | 1.00 | 34.22 |      | C |
| ANISOU | 1769 | CG  | ASP | A | 271 | 3924   | 4274   | 4804   | 113  | -773  | -74  | C |
| ATOM   | 1770 | OD1 | ASP | A | 271 | 15.452 | -2.817 | 23.874 | 1.00 | 29.05 |      | O |
| ANISOU | 1770 | OD1 | ASP | A | 271 | 3332   | 3612   | 4095   | 103  | -684  | -33  | O |
| ATOM   | 1771 | OD2 | ASP | A | 271 | 17.333 | -3.873 | 23.494 | 1.00 | 40.54 |      | O |
| ANISOU | 1771 | OD2 | ASP | A | 271 | 4644   | 5112   | 5645   | 156  | -828  | -116 | O |
| ATOM   | 1772 | C   | ASP | A | 271 | 17.331 | 0.419  | 25.800 | 1.00 | 36.12 |      | C |
| ANISOU | 1772 | C   | ASP | A | 271 | 4278   | 4402   | 5044   | -2   | -807  | -28  | C |
| ATOM   | 1773 | O   | ASP | A | 271 | 17.244 | 0.070  | 26.977 | 1.00 | 40.38 |      | O |
| ANISOU | 1773 | O   | ASP | A | 271 | 4948   | 4855   | 5538   | 12   | -880  | -36  | O |
| ATOM   | 1774 | N   | ASP | A | 272 | 17.887 | 1.569  | 25.433 | 1.00 | 33.57 |      | N |
| ANISOU | 1774 | N   | ASP | A | 272 | 3873   | 4109   | 4772   | -40  | -791  | -19  | N |
| ATOM   | 1775 | CA  | ASP | A | 272 | 18.420 | 2.503  | 26.421 | 1.00 | 37.42 |      | C |
| ANISOU | 1775 | CA  | ASP | A | 272 | 4416   | 4529   | 5275   | -62  | -865  | -19  | C |
| ATOM   | 1776 | CB  | ASP | A | 272 | 19.710 | 3.140  | 25.901 | 1.00 | 45.19 |      | C |
| ANISOU | 1776 | CB  | ASP | A | 272 | 5255   | 5552   | 6362   | -85  | -898  | -42  | C |
| ATOM   | 1777 | CG  | ASP | A | 272 | 20.295 | 4.152  | 26.869 | 1.00 | 56.44 |      | C |
| ANISOU | 1777 | CG  | ASP | A | 272 | 6726   | 6902   | 7815   | -105 | -983  | -42  | C |
| ATOM   | 1778 | OD1 | ASP | A | 272 | 19.854 | 4.191  | 28.038 | 1.00 | 59.37 |      | O |
| ANISOU | 1778 | OD1 | ASP | A | 272 | 7248   | 7187   | 8124   | -89  | -1036 | -35  | O |
| ATOM   | 1779 | OD2 | ASP | A | 272 | 21.200 | 4.907  | 26.459 | 1.00 | 59.33 |      | O |
| ANISOU | 1779 | OD2 | ASP | A | 272 | 6980   | 7297   | 8268   | -135 | -996  | -50  | O |
| ATOM   | 1780 | C   | ASP | A | 272 | 17.394 | 3.585  | 26.765 | 1.00 | 33.20 |      | C |
| ANISOU | 1780 | C   | ASP | A | 272 | 3970   | 3967   | 4676   | -99  | -802  | 30   | C |
| ATOM   | 1781 | O   | ASP | A | 272 | 17.298 | 4.599  | 26.077 | 1.00 | 34.95 |      | O |
| ANISOU | 1781 | O   | ASP | A | 272 | 4125   | 4235   | 4922   | -139 | -741  | 56   | O |
| ATOM   | 1782 | N   | LEU | A | 273 | 16.634 | 3.372  | 27.835 | 1.00 | 32.36 |      | N |
| ANISOU | 1782 | N   | LEU | A | 273 | 4018   | 3786   | 4490   | -86  | -819  | 40   | N |
| ATOM   | 1783 | CA  | LEU | A | 273 | 15.535 | 4.277  | 28.171 | 1.00 | 34.20 |      | C |
| ANISOU | 1783 | CA  | LEU | A | 273 | 4338   | 3999   | 4658   | -115 | -754  | 76   | C |
| ATOM   | 1784 | CB  | LEU | A | 273 | 14.394 | 3.516  | 28.848 | 1.00 | 34.95 |      | C |
| ANISOU | 1784 | CB  | LEU | A | 273 | 4571   | 4049   | 4661   | -97  | -718  | 83   | C |
| ATOM   | 1785 | CG  | LEU | A | 273 | 13.848 | 2.262  | 28.163 | 1.00 | 38.06 |      | C |
| ANISOU | 1785 | CG  | LEU | A | 273 | 4936   | 4482   | 5042   | -73  | -660  | 78   | C |
| ATOM   | 1786 | CD1 | LEU | A | 273 | 12.656 | 1.711  | 28.935 | 1.00 | 42.85 |      | C |
| ANISOU | 1786 | CD1 | LEU | A | 273 | 5686   | 5035   | 5559   | -68  | -617  | 90   | C |
| ATOM   | 1787 | CD2 | LEU | A | 273 | 13.468 | 2.556  | 26.727 | 1.00 | 29.30 |      | C |
| ANISOU | 1787 | CD2 | LEU | A | 273 | 3701   | 3460   | 3970   | -87  | -562  | 91   | C |
| ATOM   | 1788 | C   | LEU | A | 273 | 15.953 | 5.448  | 29.057 | 1.00 | 38.13 |      | C |
| ANISOU | 1788 | C   | LEU | A | 273 | 4888   | 4438   | 5161   | -133 | -825  | 83   | C |
| ATOM   | 1789 | O   | LEU | A | 273 | 15.099 | 6.182  | 29.564 | 1.00 | 34.02 |      | O |
| ANISOU | 1789 | O   | LEU | A | 273 | 4457   | 3888   | 4581   | -149 | -793  | 105  | O |
| ATOM   | 1790 | N   | SER | A | 274 | 17.256 | 5.628  | 29.245 | 1.00 | 41.51 |      | N |
| ANISOU | 1790 | N   | SER | A | 274 | 5259   | 4848   | 5665   | -127 | -925  | 58   | N |
| ATOM   | 1791 | CA  | SER | A | 274 | 17.744 | 6.683  | 30.129 | 1.00 | 39.97 |      | C |
| ANISOU | 1791 | CA  | SER | A | 274 | 5113   | 4587   | 5486   | -135 | -1010 | 61   | C |
| ATOM   | 1792 | CB  | SER | A | 274 | 19.275 | 6.671  | 30.218 | 1.00 | 43.48 |      | C |
| ANISOU | 1792 | CB  | SER | A | 274 | 5473   | 5011   | 6037   | -123 | -1123 | 22   | C |
| ATOM   | 1793 | OG  | SER | A | 274 | 19.868 | 6.953  | 28.963 | 1.00 | 47.69 |      | O |
| ANISOU | 1793 | OG  | SER | A | 274 | 5831   | 5632   | 6657   | -156 | -1074 | 22   | O |
| ATOM   | 1794 | C   | SER | A | 274 | 17.228 | 8.054  | 29.691 | 1.00 | 38.32 |      | C |
| ANISOU | 1794 | C   | SER | A | 274 | 4873   | 4410   | 5276   | -183 | -948  | 99   | C |
| ATOM   | 1795 | O   | SER | A | 274 | 16.670 | 8.799  | 30.497 | 1.00 | 34.59 |      | O |
| ANISOU | 1795 | O   | SER | A | 274 | 4506   | 3887   | 4751   | -186 | -966  | 114  | O |
| ATOM   | 1796 | N   | GLY | A | 275 | 17.400 | 8.374  | 28.411 | 1.00 | 38.04 |      | N |
| ANISOU | 1796 | N   | GLY | A | 275 | 4700   | 4458   | 5295   | -218 | -879  | 112  | N |
| ATOM   | 1797 | CA  | GLY | A | 275 | 16.896 | 9.624  | 27.870 | 1.00 | 34.78 |      | C |
| ANISOU | 1797 | CA  | GLY | A | 275 | 4260   | 4076   | 4879   | -267 | -823  | 147  | C |
| ATOM   | 1798 | C   | GLY | A | 275 | 15.378 | 9.654  | 27.804 | 1.00 | 31.81 |      | C |
| ANISOU | 1798 | C   | GLY | A | 275 | 3968   | 3708   | 4412   | -269 | -732  | 164  | C |
| ATOM   | 1799 | O   | GLY | A | 275 | 14.752 | 10.689 | 28.029 | 1.00 | 33.31 |      | O |
| ANISOU | 1799 | O   | GLY | A | 275 | 4207   | 3879   | 4569   | -292 | -724  | 181  | O |
| ATOM   | 1800 | N   | PHE | A | 276 | 14.783 | 8.506  | 27.497 | 1.00 | 27.01 |      | N |
| ANISOU | 1800 | N   | PHE | A | 276 | 3372   | 3123   | 3767   | -242 | -669  | 154  | N |

|        |      |     |     |   |     |        |        |        |      |       |     |   |
|--------|------|-----|-----|---|-----|--------|--------|--------|------|-------|-----|---|
| ATOM   | 1801 | CA  | PHE | A | 276 | 13.333 | 8.383  | 27.427 | 1.00 | 22.33 |     | C |
| ANISOU | 1801 | CA  | PHE | A | 276 | 2851   | 2533   | 3099   | -241 | -580  | 161 | C |
| ATOM   | 1802 | CB  | PHE | A | 276 | 12.949 | 6.972  | 26.960 | 1.00 | 21.66 |     | C |
| ANISOU | 1802 | CB  | PHE | A | 276 | 2753   | 2477   | 3001   | -209 | -524  | 148 | C |
| ATOM   | 1803 | CG  | PHE | A | 276 | 11.493 | 6.643  | 27.135 | 1.00 | 21.27 |     | C |
| ANISOU | 1803 | CG  | PHE | A | 276 | 2789   | 2413   | 2880   | -201 | -444  | 148 | C |
| ATOM   | 1804 | CD1 | PHE | A | 276 | 10.539 | 7.172  | 26.273 | 1.00 | 22.74 |     | C |
| ANISOU | 1804 | CD1 | PHE | A | 276 | 2945   | 2635   | 3061   | -220 | -357  | 153 | C |
| ATOM   | 1805 | CE1 | PHE | A | 276 | 9.200  | 6.865  | 26.432 | 1.00 | 23.02 |     | C |
| ANISOU | 1805 | CE1 | PHE | A | 276 | 3049   | 2652   | 3044   | -212 | -284  | 143 | C |
| ATOM   | 1806 | CZ  | PHE | A | 276 | 8.799  | 6.018  | 27.447 | 1.00 | 26.54 |     | C |
| ANISOU | 1806 | CZ  | PHE | A | 276 | 3597   | 3049   | 3438   | -191 | -287  | 135 | C |
| ATOM   | 1807 | CE2 | PHE | A | 276 | 9.740  | 5.480  | 28.306 | 1.00 | 27.29 |     | C |
| ANISOU | 1807 | CE2 | PHE | A | 276 | 3736   | 3108   | 3527   | -174 | -374  | 136 | C |
| ATOM   | 1808 | CD2 | PHE | A | 276 | 11.078 | 5.791  | 28.145 | 1.00 | 25.00 |     | C |
| ANISOU | 1808 | CD2 | PHE | A | 276 | 3374   | 2831   | 3295   | -175 | -456  | 138 | C |
| ATOM   | 1809 | C   | PHE | A | 276 | 12.665 | 8.735  | 28.761 | 1.00 | 25.43 |     | C |
| ANISOU | 1809 | C   | PHE | A | 276 | 3391   | 2852   | 3418   | -232 | -610  | 159 | C |
| ATOM   | 1810 | O   | PHE | A | 276 | 11.661 | 9.451  | 28.789 | 1.00 | 21.51 |     | O |
| ANISOU | 1810 | O   | PHE | A | 276 | 2939   | 2354   | 2880   | -250 | -560  | 164 | O |
| ATOM   | 1811 | N   | TYR | A | 277 | 13.228 | 8.241  | 29.864 | 1.00 | 26.04 |     | N |
| ANISOU | 1811 | N   | TYR | A | 277 | 3547   | 2866   | 3479   | -202 | -694  | 146 | N |
| ATOM   | 1812 | CA  | TYR | A | 277 | 12.688 | 8.511  | 31.199 | 1.00 | 28.84 |     | C |
| ANISOU | 1812 | CA  | TYR | A | 277 | 4054   | 3147   | 3757   | -189 | -726  | 143 | C |
| ATOM   | 1813 | CB  | TYR | A | 277 | 13.315 | 7.591  | 32.244 | 1.00 | 33.67 |     | C |
| ANISOU | 1813 | CB  | TYR | A | 277 | 4759   | 3690   | 4345   | -149 | -812  | 126 | C |
| ATOM   | 1814 | CG  | TYR | A | 277 | 12.839 | 6.155  | 32.221 | 1.00 | 33.34 |     | C |
| ANISOU | 1814 | CG  | TYR | A | 277 | 4758   | 3648   | 4261   | -129 | -763  | 119 | C |
| ATOM   | 1815 | CD1 | TYR | A | 277 | 11.519 | 5.829  | 31.915 | 1.00 | 26.59 |     | C |
| ANISOU | 1815 | CD1 | TYR | A | 277 | 3929   | 2820   | 3352   | -141 | -646  | 127 | C |
| ATOM   | 1816 | CE1 | TYR | A | 277 | 11.095 | 4.500  | 31.915 | 1.00 | 33.37 |     | C |
| ANISOU | 1816 | CE1 | TYR | A | 277 | 4826   | 3675   | 4178   | -125 | -607  | 122 | C |
| ATOM   | 1817 | CZ  | TYR | A | 277 | 11.999 | 3.498  | 32.241 | 1.00 | 35.98 |     | C |
| ANISOU | 1817 | CZ  | TYR | A | 277 | 5176   | 3972   | 4522   | -95  | -695  | 108 | C |
| ATOM   | 1818 | OH  | TYR | A | 277 | 11.628 | 2.171  | 32.263 | 1.00 | 31.26 |     | O |
| ANISOU | 1818 | OH  | TYR | A | 277 | 4620   | 3364   | 3892   | -79  | -672  | 105 | O |
| ATOM   | 1819 | CE2 | TYR | A | 277 | 13.300 | 3.813  | 32.556 | 1.00 | 39.47 |     | C |
| ANISOU | 1819 | CE2 | TYR | A | 277 | 5594   | 4386   | 5016   | -80  | -815  | 93  | C |
| ATOM   | 1820 | CD2 | TYR | A | 277 | 13.708 | 5.127  | 32.551 | 1.00 | 37.67 |     | C |
| ANISOU | 1820 | CD2 | TYR | A | 277 | 5323   | 4163   | 4827   | -97  | -846  | 99  | C |
| ATOM   | 1821 | C   | TYR | A | 277 | 12.887 | 9.958  | 31.650 | 1.00 | 28.33 |     | C |
| ANISOU | 1821 | C   | TYR | A | 277 | 4008   | 3055   | 3701   | -206 | -785  | 152 | C |
| ATOM   | 1822 | O   | TYR | A | 277 | 12.177 | 10.443 | 32.533 | 1.00 | 27.57 |     | O |
| ANISOU | 1822 | O   | TYR | A | 277 | 4024   | 2915   | 3535   | -200 | -788  | 150 | O |
| ATOM   | 1823 | N   | GLN | A | 278 | 13.868 | 10.641 | 31.074 | 1.00 | 23.86 |     | N |
| ANISOU | 1823 | N   | GLN | A | 278 | 3331   | 2512   | 3221   | -226 | -836  | 160 | N |
| ATOM   | 1824 | CA  | GLN | A | 278 | 14.014 | 12.070 | 31.327 | 1.00 | 32.64 |     | C |
| ANISOU | 1824 | CA  | GLN | A | 278 | 4447   | 3605   | 4352   | -248 | -891  | 173 | C |
| ATOM   | 1825 | CB  | GLN | A | 278 | 15.346 | 12.592 | 30.781 | 1.00 | 44.10 |     | C |
| ANISOU | 1825 | CB  | GLN | A | 278 | 5772   | 5072   | 5911   | -271 | -958  | 181 | C |
| ATOM   | 1826 | CG  | GLN | A | 278 | 16.539 | 12.302 | 31.675 | 1.00 | 57.09 |     | C |
| ANISOU | 1826 | CG  | GLN | A | 278 | 7440   | 6650   | 7604   | -235 | -1083 | 160 | C |
| ATOM   | 1827 | CD  | GLN | A | 278 | 17.864 | 12.563 | 30.981 | 1.00 | 65.81 |     | C |
| ANISOU | 1827 | CD  | GLN | A | 278 | 8394   | 7780   | 8829   | -260 | -1128 | 157 | C |
| ATOM   | 1828 | OE1 | GLN | A | 278 | 17.902 | 13.067 | 29.856 | 1.00 | 66.79 |     | O |
| ANISOU | 1828 | OE1 | GLN | A | 278 | 8407   | 7974   | 8997   | -309 | -1064 | 179 | O |
| ATOM   | 1829 | NE2 | GLN | A | 278 | 18.959 | 12.216 | 31.648 | 1.00 | 68.51 |     | N |
| ANISOU | 1829 | NE2 | GLN | A | 278 | 8738   | 8064   | 9230   | -226 | -1239 | 127 | N |
| ATOM   | 1830 | C   | GLN | A | 278 | 12.855 | 12.847 | 30.708 | 1.00 | 32.87 |     | C |
| ANISOU | 1830 | C   | GLN | A | 278 | 4469   | 3675   | 4347   | -282 | -806  | 184 | C |
| ATOM   | 1831 | O   | GLN | A | 278 | 12.508 | 13.935 | 31.171 | 1.00 | 30.09 |     | O |
| ANISOU | 1831 | O   | GLN | A | 278 | 4165   | 3296   | 3972   | -291 | -842  | 187 | O |
| ATOM   | 1832 | N   | GLU | A | 279 | 12.258 | 12.285 | 29.660 | 1.00 | 24.02 |     | N |
| ANISOU | 1832 | N   | GLU | A | 279 | 3289   | 2615   | 3224   | -295 | -701  | 184 | N |
| ATOM   | 1833 | CA  | GLU | A | 279 | 11.147 | 12.944 | 28.977 | 1.00 | 23.97 |     | C |
| ANISOU | 1833 | CA  | GLU | A | 279 | 3275   | 2642   | 3192   | -323 | -624  | 185 | C |
| ATOM   | 1834 | CB  | GLU | A | 279 | 11.152 | 12.585 | 27.485 | 1.00 | 21.20 |     | C |
| ANISOU | 1834 | CB  | GLU | A | 279 | 2810   | 2361   | 2885   | -343 | -545  | 193 | C |
| ATOM   | 1835 | CG  | GLU | A | 279 | 12.361 | 13.099 | 26.728 | 1.00 | 22.17 |     | C |
| ANISOU | 1835 | CG  | GLU | A | 279 | 2819   | 2516   | 3088   | -375 | -584  | 216 | C |

|        |      |     |     |   |     |        |        |        |      |       |     |   |
|--------|------|-----|-----|---|-----|--------|--------|--------|------|-------|-----|---|
| ATOM   | 1836 | CD  | GLU | A | 279 | 12.439 | 14.610 | 26.749 | 1.00 | 27.19 |     | C |
| ANISOU | 1836 | CD  | GLU | A | 279 | 3455   | 3136   | 3738   | -416 | -637  | 233 | C |
| ATOM   | 1837 | OE1 | GLU | A | 279 | 11.379 | 15.255 | 26.632 | 1.00 | 29.99 |     | O |
| ANISOU | 1837 | OE1 | GLU | A | 279 | 3858   | 3487   | 4050   | -428 | -606  | 225 | O |
| ATOM   | 1838 | OE2 | GLU | A | 279 | 13.554 | 15.149 | 26.893 | 1.00 | 28.99 |     | O |
| ANISOU | 1838 | OE2 | GLU | A | 279 | 3635   | 3353   | 4027   | -435 | -713  | 249 | O |
| ATOM   | 1839 | C   | GLU | A | 279 | 9.792  | 12.580 | 29.590 | 1.00 | 23.61 |     | C |
| ANISOU | 1839 | C   | GLU | A | 279 | 3337   | 2573   | 3063   | -302 | -561  | 161 | C |
| ATOM   | 1840 | O   | GLU | A | 279 | 8.965  | 13.455 | 29.852 | 1.00 | 22.60 |     | O |
| ANISOU | 1840 | O   | GLU | A | 279 | 3258   | 2431   | 2898   | -313 | -554  | 148 | O |
| ATOM   | 1841 | N   | ILE | A | 280 | 9.569  | 11.282 | 29.791 | 1.00 | 22.23 |     | N |
| ANISOU | 1841 | N   | ILE | A | 280 | 3193   | 2394   | 2860   | -275 | -516  | 152 | N |
| ATOM   | 1842 | CA  | ILE | A | 280 | 8.302  | 10.776 | 30.308 | 1.00 | 20.21 |     | C |
| ANISOU | 1842 | CA  | ILE | A | 280 | 3029   | 2118   | 2531   | -262 | -442  | 131 | C |
| ATOM   | 1843 | CB  | ILE | A | 280 | 7.642  | 9.768  | 29.338 | 1.00 | 26.23 |     | C |
| ANISOU | 1843 | CB  | ILE | A | 280 | 3738   | 2923   | 3305   | -257 | -341  | 124 | C |
| ATOM   | 1844 | CG1 | ILE | A | 280 | 7.607  | 10.309 | 27.907 | 1.00 | 25.08 |     | C |
| ANISOU | 1844 | CG1 | ILE | A | 280 | 3478   | 2834   | 3218   | -280 | -307  | 128 | C |
| ATOM   | 1845 | CD1 | ILE | A | 280 | 6.881  | 11.629 | 27.758 | 1.00 | 27.15 |     | C |
| ANISOU | 1845 | CD1 | ILE | A | 280 | 3752   | 3093   | 3470   | -306 | -301  | 114 | C |
| ATOM   | 1846 | CG2 | ILE | A | 280 | 6.233  | 9.401  | 29.812 | 1.00 | 24.37 |     | C |
| ANISOU | 1846 | CG2 | ILE | A | 280 | 3586   | 2666   | 3007   | -252 | -256  | 97  | C |
| ATOM   | 1847 | C   | ILE | A | 280 | 8.552  | 10.072 | 31.638 | 1.00 | 24.83 |     | C |
| ANISOU | 1847 | C   | ILE | A | 280 | 3731   | 2643   | 3061   | -232 | -486  | 128 | C |
| ATOM   | 1848 | O   | ILE | A | 280 | 9.249  | 9.060  | 31.688 | 1.00 | 26.21 |     | O |
| ANISOU | 1848 | O   | ILE | A | 280 | 3898   | 2810   | 3251   | -213 | -512  | 135 | O |
| ATOM   | 1849 | N   | ASP | A | 281 | 7.982  | 10.620 | 32.707 | 1.00 | 21.10 |     | N |
| ANISOU | 1849 | N   | ASP | A | 281 | 3371   | 2125   | 2521   | -227 | -497  | 116 | N |
| ATOM   | 1850 | CA  | ASP | A | 281 | 8.192  | 10.121 | 34.064 | 1.00 | 22.79 |     | C |
| ANISOU | 1850 | CA  | ASP | A | 281 | 3720   | 2272   | 2669   | -199 | -544  | 114 | C |
| ATOM   | 1851 | CB  | ASP | A | 281 | 7.311  | 10.915 | 35.033 | 1.00 | 27.83 |     | C |
| ANISOU | 1851 | CB  | ASP | A | 281 | 4468   | 2876   | 3229   | -197 | -531  | 96  | C |
| ATOM   | 1852 | CG  | ASP | A | 281 | 7.531  | 10.540 | 36.497 | 1.00 | 36.69 |     | C |
| ANISOU | 1852 | CG  | ASP | A | 281 | 5748   | 3922   | 4270   | -166 | -583  | 95  | C |
| ATOM   | 1853 | OD1 | ASP | A | 281 | 8.282  | 9.584  | 36.799 | 1.00 | 38.67 |     | O |
| ANISOU | 1853 | OD1 | ASP | A | 281 | 6034   | 4138   | 4520   | -147 | -629  | 107 | O |
| ATOM   | 1854 | OD2 | ASP | A | 281 | 6.933  | 11.221 | 37.351 | 1.00 | 37.16 |     | O |
| ANISOU | 1854 | OD2 | ASP | A | 281 | 5902   | 3954   | 4263   | -160 | -582  | 79  | O |
| ATOM   | 1855 | C   | ASP | A | 281 | 7.871  | 8.630  | 34.159 | 1.00 | 19.83 |     | C |
| ANISOU | 1855 | C   | ASP | A | 281 | 3387   | 1888   | 2259   | -188 | -483  | 114 | C |
| ATOM   | 1856 | O   | ASP | A | 281 | 6.772  | 8.202  | 33.817 | 1.00 | 21.60 |     | O |
| ANISOU | 1856 | O   | ASP | A | 281 | 3610   | 2136   | 2460   | -201 | -375  | 103 | O |
| ATOM   | 1857 | N   | GLU | A | 282 | 8.841  | 7.846  | 34.617 | 1.00 | 22.10 |     | N |
| ANISOU | 1857 | N   | GLU | A | 282 | 3711   | 2137   | 2551   | -164 | -561  | 122 | N |
| ATOM   | 1858 | CA  | GLU | A | 282 | 8.650  | 6.411  | 34.786 | 1.00 | 25.32 |     | C |
| ANISOU | 1858 | CA  | GLU | A | 282 | 4170   | 2526   | 2923   | -152 | -526  | 123 | C |
| ATOM   | 1859 | CB  | GLU | A | 282 | 9.912  | 5.783  | 35.382 | 1.00 | 29.51 |     | C |
| ANISOU | 1859 | CB  | GLU | A | 282 | 4747   | 3001   | 3463   | -121 | -650  | 124 | C |
| ATOM   | 1860 | CG  | GLU | A | 282 | 9.804  | 4.296  | 35.632 | 1.00 | 32.88 |     | C |
| ANISOU | 1860 | CG  | GLU | A | 282 | 5243   | 3400   | 3851   | -109 | -637  | 123 | C |
| ATOM   | 1861 | CD  | GLU | A | 282 | 11.015 | 3.728  | 36.362 | 1.00 | 32.35 |     | C |
| ANISOU | 1861 | CD  | GLU | A | 282 | 5246   | 3261   | 3786   | -74  | -777  | 113 | C |
| ATOM   | 1862 | OE1 | GLU | A | 282 | 11.920 | 4.509  | 36.740 | 1.00 | 30.68 |     | O |
| ANISOU | 1862 | OE1 | GLU | A | 282 | 5032   | 3018   | 3608   | -57  | -881  | 105 | O |
| ATOM   | 1863 | OE2 | GLU | A | 282 | 11.056 | 2.494  | 36.556 | 1.00 | 34.15 |     | O |
| ANISOU | 1863 | OE2 | GLU | A | 282 | 5531   | 3459   | 3985   | -62  | -789  | 111 | O |
| ATOM   | 1864 | C   | GLU | A | 282 | 7.447  | 6.122  | 35.681 | 1.00 | 25.94 |     | C |
| ANISOU | 1864 | C   | GLU | A | 282 | 4388   | 2568   | 2900   | -160 | -444  | 117 | C |
| ATOM   | 1865 | O   | GLU | A | 282 | 6.764  | 5.107  | 35.529 | 1.00 | 22.61 |     | O |
| ANISOU | 1865 | O   | GLU | A | 282 | 3986   | 2152   | 2454   | -167 | -364  | 118 | O |
| ATOM   | 1866 | N   | ASN | A | 283 | 7.183  | 7.031  | 36.609 | 1.00 | 22.89 |     | N |
| ANISOU | 1866 | N   | ASN | A | 283 | 4096   | 2145   | 2456   | -158 | -463  | 109 | N |
| ATOM   | 1867 | CA  | ASN | A | 283 | 6.175  | 6.798  | 37.632 | 1.00 | 25.31 |     | C |
| ANISOU | 1867 | CA  | ASN | A | 283 | 4550   | 2411   | 2657   | -163 | -392  | 101 | C |
| ATOM   | 1868 | CB  | ASN | A | 283 | 6.515  | 7.613  | 38.876 | 1.00 | 23.51 |     | C |
| ANISOU | 1868 | CB  | ASN | A | 283 | 4448   | 2121   | 2365   | -140 | -476  | 97  | C |
| ATOM   | 1869 | CG  | ASN | A | 283 | 6.218  | 6.875  | 40.162 | 1.00 | 31.75 |     | C |
| ANISOU | 1869 | CG  | ASN | A | 283 | 5682   | 3090   | 3292   | -130 | -462  | 99  | C |
| ATOM   | 1870 | OD1 | ASN | A | 283 | 6.403  | 5.659  | 40.258 | 1.00 | 29.30 |     | O |
| ANISOU | 1870 | OD1 | ASN | A | 283 | 5419   | 2751   | 2961   | -130 | -458  | 112 | O |



|        |      |     |     |   |     |       |        |        |      |       |     |   |
|--------|------|-----|-----|---|-----|-------|--------|--------|------|-------|-----|---|
| ATOM   | 1871 | ND2 | ASN | A | 283 | 5.779 | 7.615  | 41.176 | 1.00 | 34.55 |     | N |
| ANISOU | 1871 | ND2 | ASN | A | 283 | 6153  | 3409   | 3564   | -121 | -460  | 86  | N |
| ATOM   | 1872 | C   | ASN | A | 283 | 4.762 | 7.113  | 37.152 | 1.00 | 25.49 |     | C |
| ANISOU | 1872 | C   | ASN | A | 283 | 4529  | 2483   | 2672   | -194 | -256  | 79  | C |
| ATOM   | 1873 | O   | ASN | A | 283 | 3.806 | 6.984  | 37.908 | 1.00 | 27.34 |     | O |
| ANISOU | 1873 | O   | ASN | A | 283 | 4867  | 2694   | 2828   | -205 | -176  | 65  | O |
| ATOM   | 1874 | N   | ILE | A | 284 | 4.631 | 7.531  | 35.894 | 1.00 | 23.54 |     | N |
| ANISOU | 1874 | N   | ILE | A | 284 | 4132  | 2301   | 2512   | -206 | -229  | 72  | N |
| ATOM   | 1875 | CA  | ILE | A | 284 | 3.313 | 7.742  | 35.302 | 1.00 | 19.25 |     | C |
| ANISOU | 1875 | CA  | ILE | A | 284 | 3538  | 1798   | 1978   | -230 | -109  | 43  | C |
| ATOM   | 1876 | CB  | ILE | A | 284 | 3.123 | 9.187  | 34.763 | 1.00 | 27.58 |     | C |
| ANISOU | 1876 | CB  | ILE | A | 284 | 4516  | 2889   | 3076   | -239 | -129  | 21  | C |
| ATOM   | 1877 | CG1 | ILE | A | 284 | 3.916 | 9.390  | 33.464 | 1.00 | 23.62 |     | C |
| ANISOU | 1877 | CG1 | ILE | A | 284 | 3872  | 2433   | 2670   | -241 | -176  | 40  | C |
| ATOM   | 1878 | CD1 | ILE | A | 284 | 3.616 | 10.707 | 32.749 | 1.00 | 24.14 |     | C |
| ANISOU | 1878 | CD1 | ILE | A | 284 | 3862  | 2533   | 2779   | -257 | -186  | 20  | C |
| ATOM   | 1879 | CG2 | ILE | A | 284 | 3.495 | 10.217 | 35.827 | 1.00 | 30.05 |     | C |
| ANISOU | 1879 | CG2 | ILE | A | 284 | 4915  | 3164   | 3339   | -226 | -215  | 18  | C |
| ATOM   | 1880 | C   | ILE | A | 284 | 3.017 | 6.744  | 34.179 | 1.00 | 17.65 |     | C |
| ANISOU | 1880 | C   | ILE | A | 284 | 3238  | 1633   | 1834   | -235 | -41   | 47  | C |
| ATOM   | 1881 | O   | ILE | A | 284 | 1.930 | 6.757  | 33.609 | 1.00 | 22.17 |     | O |
| ANISOU | 1881 | O   | ILE | A | 284 | 3764  | 2231   | 2427   | -249 | 56    | 19  | O |
| ATOM   | 1882 | N   | LEU | A | 285 | 3.979 | 5.878  | 33.868 | 1.00 | 19.71 |     | N |
| ANISOU | 1882 | N   | LEU | A | 285 | 3468  | 1894   | 2126   | -219 | -97   | 76  | N |
| ATOM   | 1883 | CA  | LEU | A | 285 | 3.798 | 4.894  | 32.803 | 1.00 | 21.89 |     | C |
| ANISOU | 1883 | CA  | LEU | A | 285 | 3653  | 2206   | 2460   | -215 | -47   | 80  | C |
| ATOM   | 1884 | CB  | LEU | A | 285 | 5.094 | 4.738  | 32.003 | 1.00 | 21.00 |     | C |
| ANISOU | 1884 | CB  | LEU | A | 285 | 3437  | 2124   | 2417   | -197 | -135  | 100 | C |
| ATOM   | 1885 | CG  | LEU | A | 285 | 5.481 | 5.894  | 31.084 | 1.00 | 22.01 |     | C |
| ANISOU | 1885 | CG  | LEU | A | 285 | 3451  | 2301   | 2609   | -205 | -161  | 97  | C |
| ATOM   | 1886 | CD1 | LEU | A | 285 | 6.966 | 5.809  | 30.736 | 1.00 | 20.84 |     | C |
| ANISOU | 1886 | CD1 | LEU | A | 285 | 3234  | 2170   | 2516   | -192 | -261  | 116 | C |
| ATOM   | 1887 | CD2 | LEU | A | 285 | 4.618 | 5.870  | 29.838 | 1.00 | 21.71 |     | C |
| ANISOU | 1887 | CD2 | LEU | A | 285 | 3317  | 2312   | 2620   | -210 | -73   | 82  | C |
| ATOM   | 1888 | C   | LEU | A | 285 | 3.360 | 3.523  | 33.326 | 1.00 | 20.05 |     | C |
| ANISOU | 1888 | C   | LEU | A | 285 | 3503  | 1936   | 2179   | -215 | 0     | 88  | C |
| ATOM   | 1889 | O   | LEU | A | 285 | 3.768 | 3.106  | 34.413 | 1.00 | 19.10 |     | O |
| ANISOU | 1889 | O   | LEU | A | 285 | 3505  | 1760   | 1991   | -211 | -47   | 102 | O |
| ATOM   | 1890 | N   | PRO | A | 286 | 2.531 | 2.817  | 32.543 | 1.00 | 19.15 |     | N |
| ANISOU | 1890 | N   | PRO | A | 286 | 3328  | 1847   | 2102   | -218 | 87    | 78  | N |
| ATOM   | 1891 | CA  | PRO | A | 286 | 2.164 | 1.426  | 32.840 | 1.00 | 20.80 |     | C |
| ANISOU | 1891 | CA  | PRO | A | 286 | 3595  | 2023   | 2283   | -218 | 126   | 90  | C |
| ATOM   | 1892 | CB  | PRO | A | 286 | 1.170 | 1.073  | 31.726 | 1.00 | 19.24 |     | C |
| ANISOU | 1892 | CB  | PRO | A | 286 | 3294  | 1863   | 2154   | -217 | 221   | 71  | C |
| ATOM   | 1893 | CG  | PRO | A | 286 | 0.760 | 2.373  | 31.126 | 1.00 | 22.49 |     | C |
| ANISOU | 1893 | CG  | PRO | A | 286 | 3630  | 2311   | 2604   | -223 | 247   | 40  | C |
| ATOM   | 1894 | CD  | PRO | A | 286 | 1.945 | 3.272  | 31.272 | 1.00 | 18.62 |     | C |
| ANISOU | 1894 | CD  | PRO | A | 286 | 3132  | 1833   | 2111   | -217 | 143   | 56  | C |
| ATOM   | 1895 | C   | PRO | A | 286 | 3.379 | 0.518  | 32.721 | 1.00 | 18.03 |     | C |
| ANISOU | 1895 | C   | PRO | A | 286 | 3235  | 1666   | 1948   | -192 | 23    | 116 | C |
| ATOM   | 1896 | O   | PRO | A | 286 | 4.338 | 0.852  | 32.022 | 1.00 | 16.43 |     | O |
| ANISOU | 1896 | O   | PRO | A | 286 | 2936  | 1502   | 1805   | -171 | -51   | 119 | O |
| ATOM   | 1897 | N   | SER | A | 287 | 3.322 | -0.631 | 33.380 | 1.00 | 15.81 |     | N |
| ANISOU | 1897 | N   | SER | A | 287 | 3053  | 1336   | 1617   | -194 | 18    | 132 | N |
| ATOM   | 1898 | CA  | SER | A | 287 | 4.439 | -1.566 | 33.399 | 1.00 | 20.91 |     | C |
| ANISOU | 1898 | CA  | SER | A | 287 | 3708  | 1964   | 2272   | -166 | -93   | 147 | C |
| ATOM   | 1899 | CB  | SER | A | 287 | 4.105 | -2.764 | 34.292 | 1.00 | 20.48 |     | C |
| ANISOU | 1899 | CB  | SER | A | 287 | 3796  | 1841   | 2144   | -179 | -86   | 164 | C |
| ATOM   | 1900 | OG  | SER | A | 287 | 3.046 | -3.518 | 33.730 | 1.00 | 19.20 |     | O |
| ANISOU | 1900 | OG  | SER | A | 287 | 3594  | 1694   | 2007   | -191 | 14    | 165 | O |
| ATOM   | 1901 | C   | SER | A | 287 | 4.835 | -2.053 | 32.007 | 1.00 | 23.82 |     | C |
| ANISOU | 1901 | C   | SER | A | 287 | 3918  | 2396   | 2738   | -136 | -114  | 143 | C |
| ATOM   | 1902 | O   | SER | A | 287 | 5.993 | -2.393 | 31.778 | 1.00 | 21.18 |     | O |
| ANISOU | 1902 | O   | SER | A | 287 | 3542  | 2071   | 2435   | -108 | -220  | 144 | O |
| ATOM   | 1903 | N   | ASP | A | 288 | 3.880 | -2.102 | 31.080 | 1.00 | 21.22 |     | N |
| ANISOU | 1903 | N   | ASP | A | 288 | 3499  | 2108   | 2457   | -138 | -18   | 134 | N |
| ATOM   | 1904 | CA  | ASP | A | 288 | 4.186 | -2.577 | 29.740 | 1.00 | 17.71 |     | C |
| ANISOU | 1904 | CA  | ASP | A | 288 | 2912  | 1721   | 2097   | -104 | -33   | 130 | C |
| ATOM   | 1905 | CB  | ASP | A | 288 | 2.995 | -3.300 | 29.066 | 1.00 | 20.18 |     | C |
| ANISOU | 1905 | CB  | ASP | A | 288 | 3183  | 2041   | 2444   | -98  | 61    | 124 | C |

|        |      |     |     |   |     |       |        |        |      |       |     |   |
|--------|------|-----|-----|---|-----|-------|--------|--------|------|-------|-----|---|
| ATOM   | 1906 | CG  | ASP | A | 288 | 1.694 | -2.513 | 29.122 | 1.00 | 25.75 |     | C |
| ANISOU | 1906 | CG  | ASP | A | 288 | 3899  | 2740   | 3144   | -128 | 178   | 104 | C |
| ATOM   | 1907 | OD1 | ASP | A | 288 | 1.454 | -1.798 | 30.116 | 1.00 | 22.15 |     | O |
| ANISOU | 1907 | OD1 | ASP | A | 288 | 3538  | 2254   | 2626   | -161 | 200   | 100 | O |
| ATOM   | 1908 | OD2 | ASP | A | 288 | 0.889 | -2.637 | 28.169 | 1.00 | 26.13 |     | O |
| ANISOU | 1908 | OD2 | ASP | A | 288 | 3864  | 2812   | 3254   | -113 | 244   | 85  | O |
| ATOM   | 1909 | C   | ASP | A | 288 | 4.763 | -1.468 | 28.857 | 1.00 | 23.01 |     | C |
| ANISOU | 1909 | C   | ASP | A | 288 | 3463  | 2453   | 2825   | -95  | -53   | 120 | C |
| ATOM   | 1910 | O   | ASP | A | 288 | 5.008 | -1.672 | 27.672 | 1.00 | 25.32 |     | O |
| ANISOU | 1910 | O   | ASP | A | 288 | 3636  | 2801   | 3185   | -68  | -55   | 115 | O |
| ATOM   | 1911 | N   | PHE | A | 289 | 4.978 | -0.297 | 29.450 | 1.00 | 17.71 |     | N |
| ANISOU | 1911 | N   | PHE | A | 289 | 2833  | 1771   | 2124   | -119 | -67   | 119 | N |
| ATOM   | 1912 | CA  | PHE | A | 289 | 5.717 | 0.776  | 28.795 | 1.00 | 21.02 |     | C |
| ANISOU | 1912 | CA  | PHE | A | 289 | 3157  | 2237   | 2591   | -118 | -105  | 116 | C |
| ATOM   | 1913 | CB  | PHE | A | 289 | 4.802 | 1.960  | 28.488 | 1.00 | 18.63 |     | C |
| ANISOU | 1913 | CB  | PHE | A | 289 | 2835  | 1951   | 2294   | -143 | -29   | 102 | C |
| ATOM   | 1914 | CG  | PHE | A | 289 | 3.801 | 1.678  | 27.405 | 1.00 | 21.27 |     | C |
| ANISOU | 1914 | CG  | PHE | A | 289 | 3095  | 2315   | 2672   | -132 | 59    | 86  | C |
| ATOM   | 1915 | CD1 | PHE | A | 289 | 4.058 | 2.040  | 26.093 | 1.00 | 24.64 |     | C |
| ANISOU | 1915 | CD1 | PHE | A | 289 | 3403  | 2796   | 3162   | -118 | 61    | 83  | C |
| ATOM   | 1916 | CE1 | PHE | A | 289 | 3.134 | 1.775  | 25.092 | 1.00 | 22.30 |     | C |
| ANISOU | 1916 | CE1 | PHE | A | 289 | 3048  | 2518   | 2908   | -100 | 132   | 64  | C |
| ATOM   | 1917 | CZ  | PHE | A | 289 | 1.947 | 1.142  | 25.401 | 1.00 | 21.68 |     | C |
| ANISOU | 1917 | CZ  | PHE | A | 289 | 3018  | 2401   | 2818   | -98  | 202   | 47  | C |
| ATOM   | 1918 | CE2 | PHE | A | 289 | 1.684 | 0.774  | 26.704 | 1.00 | 26.13 |     | C |
| ANISOU | 1918 | CE2 | PHE | A | 289 | 3693  | 2916   | 3320   | -120 | 210   | 52  | C |
| ATOM   | 1919 | CD2 | PHE | A | 289 | 2.609 | 1.042  | 27.697 | 1.00 | 22.39 |     | C |
| ANISOU | 1919 | CD2 | PHE | A | 289 | 3289  | 2424   | 2794   | -136 | 138   | 73  | C |
| ATOM   | 1920 | C   | PHE | A | 289 | 6.888 | 1.214  | 29.668 | 1.00 | 28.20 |     | C |
| ANISOU | 1920 | C   | PHE | A | 289 | 4119  | 3118   | 3479   | -121 | -211  | 123 | C |
| ATOM   | 1921 | O   | PHE | A | 289 | 7.342 | 2.353  | 29.584 | 1.00 | 27.95 |     | O |
| ANISOU | 1921 | O   | PHE | A | 289 | 4051  | 3101   | 3466   | -134 | -240  | 123 | O |
| ATOM   | 1922 | N   | GLY | A | 290 | 7.365 | 0.299  | 30.508 | 1.00 | 25.47 |     | N |
| ANISOU | 1922 | N   | GLY | A | 290 | 3862  | 2722   | 3095   | -108 | -276  | 127 | N |
| ATOM   | 1923 | CA  | GLY | A | 290 | 8.545 | 0.532  | 31.327 | 1.00 | 26.80 |     | C |
| ANISOU | 1923 | CA  | GLY | A | 290 | 4083  | 2849   | 3251   | -99  | -394  | 126 | C |
| ATOM   | 1924 | C   | GLY | A | 290 | 8.301 | 1.278  | 32.628 | 1.00 | 28.76 |     | C |
| ANISOU | 1924 | C   | GLY | A | 290 | 4472  | 3033   | 3422   | -117 | -405  | 130 | C |
| ATOM   | 1925 | O   | GLY | A | 290 | 9.245 | 1.724  | 33.283 | 1.00 | 27.33 |     | O |
| ANISOU | 1925 | O   | GLY | A | 290 | 4331  | 2814   | 3238   | -107 | -506  | 126 | O |
| ATOM   | 1926 | N   | GLY | A | 291 | 7.036 | 1.406  | 33.015 | 1.00 | 21.35 |     | N |
| ANISOU | 1926 | N   | GLY | A | 291 | 3608  | 2080   | 2426   | -140 | -305  | 132 | N |
| ATOM   | 1927 | CA  | GLY | A | 291 | 6.678 | 2.209  | 34.173 | 1.00 | 20.67 |     | C |
| ANISOU | 1927 | CA  | GLY | A | 291 | 3647  | 1943   | 2264   | -155 | -300  | 131 | C |
| ATOM   | 1928 | C   | GLY | A | 291 | 6.374 | 1.406  | 35.425 | 1.00 | 22.66 |     | C |
| ANISOU | 1928 | C   | GLY | A | 291 | 4075  | 2117   | 2418   | -157 | -301  | 138 | C |
| ATOM   | 1929 | O   | GLY | A | 291 | 6.528 | 0.183  | 35.451 | 1.00 | 21.84 |     | O |
| ANISOU | 1929 | O   | GLY | A | 291 | 4003  | 1991   | 2305   | -149 | -319  | 146 | O |
| ATOM   | 1930 | N   | THR | A | 292 | 5.928 | 2.106  | 36.464 | 1.00 | 21.85 |     | N |
| ANISOU | 1930 | N   | THR | A | 292 | 4091  | 1972   | 2237   | -169 | -281  | 136 | N |
| ATOM   | 1931 | CA  | THR | A | 292 | 5.640 | 1.494  | 37.755 | 1.00 | 24.37 |     | C |
| ANISOU | 1931 | CA  | THR | A | 292 | 4599  | 2213   | 2448   | -175 | -277  | 144 | C |
| ATOM   | 1932 | CB  | THR | A | 292 | 6.206 | 2.343  | 38.915 | 1.00 | 24.23 |     | C |
| ANISOU | 1932 | CB  | THR | A | 292 | 4703  | 2134   | 2368   | -157 | -365  | 141 | C |
| ATOM   | 1933 | OG1 | THR | A | 292 | 5.622 | 3.651  | 38.874 | 1.00 | 23.32 |     | O |
| ANISOU | 1933 | OG1 | THR | A | 292 | 4550  | 2055   | 2256   | -168 | -314  | 126 | O |
| ATOM   | 1934 | CG2 | THR | A | 292 | 7.734 | 2.462  | 38.824 | 1.00 | 21.89 |     | C |
| ANISOU | 1934 | CG2 | THR | A | 292 | 4367  | 1817   | 2133   | -119 | -526  | 138 | C |
| ATOM   | 1935 | C   | THR | A | 292 | 4.139 | 1.317  | 37.991 | 1.00 | 22.56 |     | C |
| ANISOU | 1935 | C   | THR | A | 292 | 4423  | 1988   | 2162   | -212 | -124  | 140 | C |
| ATOM   | 1936 | O   | THR | A | 292 | 3.732 | 0.782  | 39.023 | 1.00 | 23.02 |     | O |
| ANISOU | 1936 | O   | THR | A | 292 | 4640  | 1985   | 2123   | -227 | -92   | 149 | O |
| ATOM   | 1937 | N   | LEU | A | 293 | 3.319 | 1.781  | 37.049 | 1.00 | 20.11 |     | N |
| ANISOU | 1937 | N   | LEU | A | 293 | 3985  | 1745   | 1913   | -228 | -29   | 123 | N |
| ATOM   | 1938 | CA  | LEU | A | 293 | 1.865 | 1.645  | 37.176 | 1.00 | 22.11 |     | C |
| ANISOU | 1938 | CA  | LEU | A | 293 | 4264  | 2003   | 2133   | -262 | 118   | 107 | C |
| ATOM   | 1939 | CB  | LEU | A | 293 | 1.141 | 2.807  | 36.482 | 1.00 | 22.53 |     | C |
| ANISOU | 1939 | CB  | LEU | A | 293 | 4205  | 2115   | 2241   | -270 | 182   | 71  | C |
| ATOM   | 1940 | CG  | LEU | A | 293 | 1.386 | 4.231  | 37.012 | 1.00 | 24.35 |     | C |
| ANISOU | 1940 | CG  | LEU | A | 293 | 4464  | 2345   | 2444   | -263 | 131   | 55  | C |

|        |      |     |     |   |     |        |        |        |       |       |     |   |
|--------|------|-----|-----|---|-----|--------|--------|--------|-------|-------|-----|---|
| ATOM   | 1941 | CD1 | LEU | A | 293 | 0.416  | 5.212  | 36.354 | 1.00  | 23.25 |     | C |
| ANISOU | 1941 | CD1 | LEU | A | 293 | 4227   | 2255   | 2350   | -276  | 206   | 12  | C |
| ATOM   | 1942 | CD2 | LEU | A | 293 | 1.275  | 4.308  | 38.522 | 1.00  | 31.72 |     | C |
| ANISOU | 1942 | CD2 | LEU | A | 293 | 5578   | 3215   | 3259   | -267  | 129   | 57  | C |
| ATOM   | 1943 | C   | LEU | A | 293 | 1.389  | 0.298  | 36.627 | 1.00  | 21.90 |     | C |
| ANISOU | 1943 | C   | LEU | A | 293 | 4206   | 1980   | 2135   | -272  | 180   | 118 | C |
| ATOM   | 1944 | O   | LEU | A | 293 | 2.137  | -0.392 | 35.931 | 1.00  | 20.30 |     | O |
| ANISOU | 1944 | O   | LEU | A | 293 | 3932   | 1791   | 1989   | -249  | 110   | 134 | O |
| ATOM   | 1945 | N   | PRO | A | 294 | 0.150  | -0.101 | 36.961 | 1.00  | 20.36 |     | N |
| ANISOU | 1945 | N   | PRO | A | 294 | 4063   | 1770   | 1903   | -307  | 308   | 108 | N |
| ATOM   | 1946 | CA  | PRO | A | 294 | -0.335 | -1.395 | 36.476 | 1.00  | 23.84 |     | C |
| ANISOU | 1946 | CA  | PRO | A | 294 | 4476   | 2206   | 2375   | -318  | 362   | 120 | C |
| ATOM   | 1947 | CB  | PRO | A | 294 | -1.767 | -1.463 | 37.024 | 1.00  | 22.68 |     | C |
| ANISOU | 1947 | CB  | PRO | A | 294 | 4392   | 2041   | 2185   | -364  | 515   | 100 | C |
| ATOM   | 1948 | CG  | PRO | A | 294 | -1.733 | -0.605 | 38.246 | 1.00  | 24.07 |     | C |
| ANISOU | 1948 | CG  | PRO | A | 294 | 4700   | 2187   | 2259   | -376  | 515   | 92  | C |
| ATOM   | 1949 | CD  | PRO | A | 294 | -0.797 | 0.529  | 37.901 | 1.00  | 23.07 |     | C |
| ANISOU | 1949 | CD  | PRO | A | 294 | 4503   | 2093   | 2168   | -338  | 404   | 84  | C |
| ATOM   | 1950 | C   | PRO | A | 294 | -0.325 | -1.502 | 34.951 | 1.00  | 24.45 |     | C |
| ANISOU | 1950 | C   | PRO | A | 294 | 4369   | 2346   | 2575   | -292  | 359   | 109 | C |
| ATOM   | 1951 | O   | PRO | A | 294 | -0.433 | -0.497 | 34.248 | 1.00  | 21.39 |     | O |
| ANISOU | 1951 | O   | PRO | A | 294 | 3875   | 2006   | 2244   | -281  | 367   | 82  | O |
| ATOM   | 1952 | N   | LYS | A | 295 | -0.164 | -2.723 | 34.455 | 1.00  | 16.28 |     | N |
| ANISOU | 1952 | N   | LYS | A | 295 | 3305   | 1306   | 1576   | -280  | 338   | 129 | N |
| ATOM   | 1953 | CA  | LYS | A | 295 | -0.243 | -2.997 | 33.028 | 1.00  | 24.83 |     | C |
| ANISOU | 1953 | CA  | LYS | A | 295 | 4225   | 2442   | 2768   | -250  | 341   | 119 | C |
| ATOM   | 1954 | CB  | LYS | A | 295 | -0.371 | -4.501 | 32.786 | 1.00  | 26.25 |     | C |
| ANISOU | 1954 | CB  | LYS | A | 295 | 4409   | 2599   | 2966   | -243  | 337   | 140 | C |
| ATOM   | 1955 | CG  | LYS | A | 295 | -0.406 | -4.891 | 31.314 | 1.00  | 25.69 |     | C |
| ANISOU | 1955 | CG  | LYS | A | 295 | 4177   | 2579   | 3005   | -201  | 329   | 130 | C |
| ATOM   | 1956 | CD  | LYS | A | 295 | -0.764 | -6.367 | 31.145 | 1.00  | 33.33 |     | C |
| ANISOU | 1956 | CD  | LYS | A | 295 | 5155   | 3518   | 3992   | -196  | 336   | 148 | C |
| ATOM   | 1957 | CE  | LYS | A | 295 | -0.444 | -6.846 | 29.740 | 1.00  | 33.26 |     | C |
| ANISOU | 1957 | CE  | LYS | A | 295 | 4996   | 3559   | 4082   | -139  | 288   | 141 | C |
| ATOM   | 1958 | NZ  | LYS | A | 295 | 1.027  | -6.742 | 29.500 | 1.00  | 39.19 |     | N |
| ANISOU | 1958 | NZ  | LYS | A | 295 | 5713   | 4343   | 4835   | -103  | 157   | 150 | N |
| ATOM   | 1959 | C   | LYS | A | 295 | -1.441 | -2.271 | 32.429 | 1.00  | 20.49 |     | C |
| ANISOU | 1959 | C   | LYS | A | 295 | 3591   | 1923   | 2271   | -261  | 454   | 78  | C |
| ATOM   | 1960 | O   | LYS | A | 295 | -2.540 | -2.304 | 32.997 | 1.00  | 19.86 |     | O |
| ANISOU | 1960 | O   | LYS | A | 295 | 3570   | 1815   | 2161   | -297  | 561   | 59  | O |
| ATOM   | 1961 | N   | TYR | A | 296 | -1.226 | -1.608 | 31.296 | 1.00  | 25.94 |     | N |
| ANISOU | 1961 | N   | TYR | A | 296 | 3662   | 3956   | 2237   | -1513 | 595   | 384 | N |
| ATOM   | 1962 | CA  | TYR | A | 296 | -2.276 | -0.784 | 30.700 | 1.00  | 24.07 |     | C |
| ANISOU | 1962 | CA  | TYR | A | 296 | 3511   | 3525   | 2110   | -1399 | 745   | 301 | C |
| ATOM   | 1963 | CB  | TYR | A | 296 | -1.811 | -0.067 | 29.423 | 1.00  | 24.70 |     | C |
| ANISOU | 1963 | CB  | TYR | A | 296 | 3662   | 3413   | 2311   | -1251 | 862   | 171 | C |
| ATOM   | 1964 | CG  | TYR | A | 296 | -2.911 | 0.819  | 28.885 | 1.00  | 23.84 |     | C |
| ANISOU | 1964 | CG  | TYR | A | 296 | 3624   | 3120   | 2315   | -1134 | 1030  | 128 | C |
| ATOM   | 1965 | CD1 | TYR | A | 296 | -3.200 | 2.040  | 29.489 | 1.00  | 26.58 |     | C |
| ANISOU | 1965 | CD1 | TYR | A | 296 | 4035   | 3415   | 2648   | -1234 | 1259  | -2  | C |
| ATOM   | 1966 | CE1 | TYR | A | 296 | -4.228 | 2.840  | 29.028 | 1.00  | 25.90 |     | C |
| ANISOU | 1966 | CE1 | TYR | A | 296 | 4008   | 3153   | 2680   | -1114 | 1428  | -6  | C |
| ATOM   | 1967 | CZ  | TYR | A | 296 | -4.988 | 2.423  | 27.955 | 1.00  | 25.70 |     | C |
| ANISOU | 1967 | CZ  | TYR | A | 296 | 3958   | 3040   | 2765   | -898  | 1355  | 121 | C |
| ATOM   | 1968 | OH  | TYR | A | 296 | -6.012 | 3.211  | 27.492 | 1.00  | 24.67 |     | O |
| ANISOU | 1968 | OH  | TYR | A | 296 | 3863   | 2764   | 2746   | -770  | 1524  | 151 | O |
| ATOM   | 1969 | CE2 | TYR | A | 296 | -4.730 | 1.216  | 27.344 | 1.00  | 25.68 |     | C |
| ANISOU | 1969 | CE2 | TYR | A | 296 | 3888   | 3108   | 2762   | -820  | 1126  | 223 | C |
| ATOM   | 1970 | CD2 | TYR | A | 296 | -3.700 | 0.414  | 27.817 | 1.00  | 26.03 |     | C |
| ANISOU | 1970 | CD2 | TYR | A | 296 | 3892   | 3288   | 2710   | -934  | 971   | 227 | C |
| ATOM   | 1971 | C   | TYR | A | 296 | -3.548 | -1.574 | 30.405 | 1.00  | 26.07 |     | C |
| ANISOU | 1971 | C   | TYR | A | 296 | 3739   | 3718   | 2447   | -1288 | 626   | 475 | C |
| ATOM   | 1972 | O   | TYR | A | 296 | -3.511 | -2.617 | 29.758 | 1.00  | 23.75 |     | O |
| ANISOU | 1972 | O   | TYR | A | 296 | 3411   | 3385   | 2229   | -1193 | 455   | 598 | O |
| ATOM   | 1973 | N   | ASP | A | 297 | -4.673 | -1.045 | 30.869 | 1.00  | 23.05 |     | N |
| ANISOU | 1973 | N   | ASP | A | 297 | 3371   | 3329   | 2058   | -1310 | 731   | 476 | N |
| ATOM   | 1974 | CA  | ASP | A | 297 | -5.971 | -1.654 | 30.631 | 1.00  | 30.69 |     | C |
| ANISOU | 1974 | CA  | ASP | A | 297 | 4297   | 4263   | 3100   | -1225 | 642   | 635 | C |
| ATOM   | 1975 | CB  | ASP | A | 297 | -6.575 | -2.115 | 31.960 | 1.00  | 34.48 |     | C |
| ANISOU | 1975 | CB  | ASP | A | 297 | 4701   | 4933   | 3469   | -1387 | 572   | 777 | C |

|        |      |     |     |   |     |         |        |        |       |       |      |   |
|--------|------|-----|-----|---|-----|---------|--------|--------|-------|-------|------|---|
| ATOM   | 1976 | CG  | ASP | A | 297 | -7.921  | -2.781 | 31.791 | 1.00  | 44.79 | C    |   |
| ANISOU | 1976 | CG  | ASP | A | 297 | 5945    | 6223   | 4852   | -1329 | 471   | 961  | C |
| ATOM   | 1977 | OD1 | ASP | A | 297 | -8.344  | -2.995 | 30.637 | 1.00  | 43.82 | O    |   |
| ANISOU | 1977 | OD1 | ASP | A | 297 | 5830    | 5959   | 4860   | -1176 | 436   | 975  | O |
| ATOM   | 1978 | OD2 | ASP | A | 297 | -8.552  | -3.092 | 32.822 | 1.00  | 53.99 | O    |   |
| ANISOU | 1978 | OD2 | ASP | A | 297 | 7037    | 7542   | 5936   | -1451 | 429   | 1097 | O |
| ATOM   | 1979 | C   | ASP | A | 297 | -6.891  | -0.646 | 29.954 | 1.00  | 29.44 | C    |   |
| ANISOU | 1979 | C   | ASP | A | 297 | 4196    | 3950   | 3038   | -1088 | 833   | 561  | C |
| ATOM   | 1980 | O   | ASP | A | 297 | -7.234  | 0.374  | 30.543 | 1.00  | 31.66 | O    |   |
| ANISOU | 1980 | O   | ASP | A | 297 | 4524    | 4221   | 3286   | -1145 | 1030  | 472  | O |
| ATOM   | 1981 | N   | GLY | A | 298 | -7.287  | -0.937 | 28.718 | 1.00  | 29.14 | N    |   |
| ANISOU | 1981 | N   | GLY | A | 298 | 4148    | 3801   | 3122   | -913  | 785   | 608  | N |
| ATOM   | 1982 | CA  | GLY | A | 298 | -8.092  | -0.018 | 27.927 | 1.00  | 29.90 | C    |   |
| ANISOU | 1982 | CA  | GLY | A | 298 | 4277    | 3767   | 3319   | -759  | 959   | 577  | C |
| ATOM   | 1983 | C   | GLY | A | 298 | -9.474  | 0.278  | 28.485 | 1.00  | 32.50 | C    |   |
| ANISOU | 1983 | C   | GLY | A | 298 | 4572    | 4128   | 3647   | -767  | 1039  | 669  | C |
| ATOM   | 1984 | O   | GLY | A | 298 | -10.078 | 1.297  | 28.158 | 1.00  | 35.04 | O    |   |
| ANISOU | 1984 | O   | GLY | A | 298 | 4933    | 4343   | 4040   | -665  | 1241  | 642  | O |
| ATOM   | 1985 | N   | LYS | A | 299 | -9.978  | -0.607 | 29.339 | 1.00  | 37.87 | N    |   |
| ANISOU | 1985 | N   | LYS | A | 299 | 5176    | 4958   | 4256   | -887  | 887   | 802  | N |
| ATOM   | 1986 | CA  | LYS | A | 299 | -11.322 | -0.447 | 29.896 | 1.00  | 45.58 | C    |   |
| ANISOU | 1986 | CA  | LYS | A | 299 | 6097    | 6000   | 5220   | -902  | 944   | 918  | C |
| ATOM   | 1987 | CB  | LYS | A | 299 | -11.708 | -1.669 | 30.730 | 1.00  | 56.64 | C    |   |
| ANISOU | 1987 | CB  | LYS | A | 299 | 7393    | 7575   | 6552   | -1047 | 726   | 1102 | C |
| ATOM   | 1988 | CG  | LYS | A | 299 | -11.985 | -2.917 | 29.905 | 1.00  | 64.87 | C    |   |
| ANISOU | 1988 | CG  | LYS | A | 299 | 8361    | 8599   | 7688   | -1009 | 493   | 1243 | C |
| ATOM   | 1989 | CD  | LYS | A | 299 | -12.221 | -4.126 | 30.797 | 1.00  | 72.19 | C    |   |
| ANISOU | 1989 | CD  | LYS | A | 299 | 9195    | 9657   | 8578   | -1175 | 280   | 1445 | C |
| ATOM   | 1990 | CE  | LYS | A | 299 | -10.966 | -4.479 | 31.578 | 1.00  | 76.52 | C    |   |
| ANISOU | 1990 | CE  | LYS | A | 299 | 9766    | 10271  | 9038   | -1297 | 205   | 1422 | C |
| ATOM   | 1991 | NZ  | LYS | A | 299 | -11.230 | -5.460 | 32.665 | 1.00  | 80.22 | N    |   |
| ANISOU | 1991 | NZ  | LYS | A | 299 | 10131   | 10893  | 9458   | -1465 | 38    | 1653 | N |
| ATOM   | 1992 | C   | LYS | A | 299 | -11.508 | 0.835  | 30.708 | 1.00  | 49.31 | C    |   |
| ANISOU | 1992 | C   | LYS | A | 299 | 6639    | 6454   | 5641   | -951  | 1209  | 809  | C |
| ATOM   | 1993 | O   | LYS | A | 299 | -12.558 | 1.471  | 30.637 | 1.00  | 47.13 | O    |   |
| ANISOU | 1993 | O   | LYS | A | 299 | 6356    | 6136   | 5415   | -867  | 1362  | 857  | O |
| ATOM   | 1994 | N   | ALA | A | 300 | -10.491 | 1.212  | 31.476 | 1.00  | 53.79 | N    |   |
| ANISOU | 1994 | N   | ALA | A | 300 | 7268    | 7059   | 6110   | -1098 | 1273  | 663  | N |
| ATOM   | 1995 | CA  | ALA | A | 300 | -10.567 | 2.409  | 32.310 | 1.00  | 55.08 | C    |   |
| ANISOU | 1995 | CA  | ALA | A | 300 | 7501    | 7209   | 6217   | -1193 | 1539  | 523  | C |
| ATOM   | 1996 | CB  | ALA | A | 300 | -9.330  | 2.520  | 33.186 | 1.00  | 56.78 | C    |   |
| ANISOU | 1996 | CB  | ALA | A | 300 | 7743    | 7542   | 6290   | -1405 | 1547  | 370  | C |
| ATOM   | 1997 | C   | ALA | A | 300 | -10.758 | 3.685  | 31.486 | 1.00  | 57.38 | C    |   |
| ANISOU | 1997 | C   | ALA | A | 300 | 7894    | 7246   | 6663   | -1041 | 1805  | 420  | C |
| ATOM   | 1998 | O   | ALA | A | 300 | -11.624 | 4.510  | 31.789 | 1.00  | 56.77 | O    |   |
| ANISOU | 1998 | O   | ALA | A | 300 | 7840    | 7111   | 6618   | -1012 | 2025  | 421  | O |
| ATOM   | 1999 | N   | VAL | A | 301 | -9.940  | 3.846  | 30.450 | 1.00  | 50.07 | N    |   |
| ANISOU | 1999 | N   | VAL | A | 301 | 7019    | 6171   | 5833   | -941  | 1796  | 353  | N |
| ATOM   | 2000 | CA  | VAL | A | 301 | -10.058 | 4.993  | 29.561 | 1.00  | 55.28 | C    |   |
| ANISOU | 2000 | CA  | VAL | A | 301 | 7759    | 6588   | 6655   | -786  | 2035  | 303  | C |
| ATOM   | 2001 | CB  | VAL | A | 301 | -8.958  | 4.991  | 28.479 | 1.00  | 54.10 | C    |   |
| ANISOU | 2001 | CB  | VAL | A | 301 | 7642    | 6334   | 6579   | -705  | 1982  | 244  | C |
| ATOM   | 2002 | CG1 | VAL | A | 301 | -9.477  | 5.604  | 27.191 | 1.00  | 55.81 | C    |   |
| ANISOU | 2002 | CG1 | VAL | A | 301 | 7866    | 6373   | 6964   | -465  | 2107  | 335  | C |
| ATOM   | 2003 | CG2 | VAL | A | 301 | -7.725  | 5.729  | 28.974 | 1.00  | 56.53 | C    |   |
| ANISOU | 2003 | CG2 | VAL | A | 301 | 8039    | 6586   | 6854   | -879  | 2122  | 35   | C |
| ATOM   | 2004 | C   | VAL | A | 301 | -11.418 | 4.998  | 28.887 | 1.00  | 51.70 | C    |   |
| ANISOU | 2004 | C   | VAL | A | 301 | 7244    | 6097   | 6302   | -582  | 2061  | 490  | C |
| ATOM   | 2005 | O   | VAL | A | 301 | -12.097 | 6.022  | 28.840 | 1.00  | 50.81 | O    |   |
| ANISOU | 2005 | O   | VAL | A | 301 | 7173    | 5849   | 6282   | -499  | 2318  | 506  | O |
| ATOM   | 2006 | N   | ALA | A | 302 | -11.807 | 3.838  | 28.369 | 1.00  | 45.95 | N    |   |
| ANISOU | 2006 | N   | ALA | A | 302 | 6406    | 5494   | 5558   | -514  | 1804  | 635  | N |
| ATOM   | 2007 | CA  | ALA | A | 302 | -13.073 | 3.695  | 27.667 | 1.00  | 41.76 | C    |   |
| ANISOU | 2007 | CA  | ALA | A | 302 | 5782    | 4980   | 5103   | -346  | 1792  | 820  | C |
| ATOM   | 2008 | CB  | ALA | A | 302 | -13.295 | 2.241  | 27.280 | 1.00  | 31.07 | C    |   |
| ANISOU | 2008 | CB  | ALA | A | 302 | 4307    | 3788   | 3711   | -359  | 1485  | 939  | C |
| ATOM   | 2009 | C   | ALA | A | 302 | -14.239 | 4.210  | 28.507 | 1.00  | 47.64 | C    |   |
| ANISOU | 2009 | C   | ALA | A | 302 | 6507    | 5764   | 5832   | -362  | 1955  | 900  | C |
| ATOM   | 2010 | O   | ALA | A | 302 | -15.052 | 5.005  | 28.036 | 1.00  | 48.73 | O    |   |
| ANISOU | 2010 | O   | ALA | A | 302 | 6639    | 5806   | 6072   | -204  | 2148  | 987  | O |

|        |      |     |     |   |     |         |        |        |       |        |      |   |
|--------|------|-----|-----|---|-----|---------|--------|--------|-------|--------|------|---|
| ATOM   | 2011 | N   | GLU | A | 303 | -14.314 | 3.758  | 29.753 | 1.00  | 55.52  | N    |   |
| ANISOU | 2011 | N   | GLU | A | 303 | 7482    | 6918   | 6694   | -549  | 1884   | 889  | N |
| ATOM   | 2012 | CA  | GLU | A | 303 | -15.386 | 4.183  | 30.645 | 1.00  | 66.49  | C    |   |
| ANISOU | 2012 | CA  | GLU | A | 303 | 8840    | 8385   | 8040   | -583  | 2037   | 963  | C |
| ATOM   | 2013 | CB  | GLU | A | 303 | -15.351 | 3.390  | 31.955 | 1.00  | 71.95  | C    |   |
| ANISOU | 2013 | CB  | GLU | A | 303 | 9470    | 9315   | 8552   | -804  | 1889   | 984  | C |
| ATOM   | 2014 | CG  | GLU | A | 303 | -15.866 | 1.962  | 31.811 | 1.00  | 76.81  | C    |   |
| ANISOU | 2014 | CG  | GLU | A | 303 | 9939    | 10105  | 9139   | -826  | 1579   | 1193 | C |
| ATOM   | 2015 | CD  | GLU | A | 303 | -15.702 | 1.134  | 33.073 | 1.00  | 81.57  | C    |   |
| ANISOU | 2015 | CD  | GLU | A | 303 | 10474   | 10939  | 9578   | -1046 | 1424   | 1254 | C |
| ATOM   | 2016 | OE1 | GLU | A | 303 | -15.151 | 1.651  | 34.067 | 1.00  | 83.61  | O    |   |
| ANISOU | 2016 | OE1 | GLU | A | 303 | 10790   | 11264  | 9716   | -1185 | 1548   | 1120 | O |
| ATOM   | 2017 | OE2 | GLU | A | 303 | -16.125 | -0.042 | 33.067 | 1.00  | 81.57  | O    |   |
| ANISOU | 2017 | OE2 | GLU | A | 303 | 10356   | 11064  | 9572   | -1092 | 1182   | 1446 | O |
| ATOM   | 2018 | C   | GLU | A | 303 | -15.334 | 5.686  | 30.909 | 1.00  | 70.17  | C    |   |
| ANISOU | 2018 | C   | GLU | A | 303 | 9430    | 8663   | 8570   | -558  | 2403   | 826  | C |
| ATOM   | 2019 | O   | GLU | A | 303 | -16.367 | 6.320  | 31.114 | 1.00  | 71.21  | O    |   |
| ANISOU | 2019 | O   | GLU | A | 303 | 9543    | 8774   | 8741   | -477  | 2606   | 912  | O |
| ATOM   | 2020 | N   | GLN | A | 304 | -14.133 | 6.256  | 30.886 | 1.00  | 72.85  | N    |   |
| ANISOU | 2020 | N   | GLN | A | 304 | 9890    | 8861   | 8929   | -634  | 2501   | 621  | N |
| ATOM   | 2021 | CA  | GLN | A | 304 | -13.965 | 7.687  | 31.114 | 1.00  | 78.00  | C    |   |
| ANISOU | 2021 | CA  | GLN | A | 304 | 10665   | 9301   | 9668   | -649  | 2869   | 470  | C |
| ATOM   | 2022 | C   | GLN | A | 304 | -14.464 | 8.523  | 29.936 | 1.00  | 77.03  | C    |   |
| ANISOU | 2022 | C   | GLN | A | 304 | 10571   | 8939   | 9758   | -394  | 3067   | 581  | C |
| ATOM   | 2023 | CB  | GLN | A | 304 | -12.502 | 8.023  | 31.396 | 1.00  | 86.02  | C    |   |
| ANISOU | 2023 | CB  | GLN | A | 304 | 11781   | 10252  | 10650  | -832  | 2911   | 224  | C |
| ATOM   | 2024 | CG  | GLN | A | 304 | -12.243 | 9.512  | 31.541 | 1.00  | 95.95  | C    |   |
| ANISOU | 2024 | CG  | GLN | A | 304 | 13164   | 11263  | 12029  | -875  | 3310   | 48   | C |
| ATOM   | 2025 | CD  | GLN | A | 304 | -10.819 | 9.900  | 31.198 | 1.00  | 101.51 | C    |   |
| ANISOU | 2025 | CD  | GLN | A | 304 | 13951   | 11839  | 12779  | -976  | 3348   | -138 | C |
| ATOM   | 2026 | OE1 | GLN | A | 304 | -9.931  | 9.051  | 31.125 | 1.00  | 102.14 | O    |   |
| ANISOU | 2026 | OE1 | GLN | A | 304 | 13995   | 12059  | 12753  | -1054 | 3078   | -169 | O |
| ATOM   | 2027 | NE2 | GLN | A | 304 | -10.595 | 11.190 | 30.982 | 1.00  | 104.34 | N    |   |
| ANISOU | 2027 | NE2 | GLN | A | 304 | 14411   | 11928  | 13305  | -976  | 3699   | -252 | N |
| ATOM   | 2028 | O   | GLN | A | 304 | -15.031 | 9.599  | 30.123 | 1.00  | 78.69  | O    |   |
| ANISOU | 2028 | O   | GLN | A | 304 | 10834   | 8998   | 10067  | -337  | 3392   | 580  | O |
| ATOM   | 2029 | N   | LEU | A | 305 | -14.243 | 8.029  | 28.722 | 1.00  | 74.16  | N    |   |
| ANISOU | 2029 | N   | LEU | A | 305 | 10162   | 8554   | 9462   | -240  | 2885   | 684  | N |
| ATOM   | 2030 | CA  | LEU | A | 305 | -14.659 | 8.749  | 27.522 | 1.00  | 72.86  | C    |   |
| ANISOU | 2030 | CA  | LEU | A | 305 | 9993    | 8212   | 9477   | 9     | 3048   | 823  | C |
| ATOM   | 2031 | C   | LEU | A | 305 | -16.153 | 8.589  | 27.279 | 1.00  | 74.23  | C    |   |
| ANISOU | 2031 | C   | LEU | A | 305 | 10040   | 8491   | 9673   | 178   | 3051   | 1070 | C |
| ATOM   | 2032 | CB  | LEU | A | 305 | -13.879 | 8.262  | 26.298 | 1.00  | 67.95  | C    |   |
| ANISOU | 2032 | CB  | LEU | A | 305 | 9343    | 7585   | 8890   | 104   | 2855   | 843  | C |
| ATOM   | 2033 | CG  | LEU | A | 305 | -12.360 | 8.430  | 26.345 | 1.00  | 65.51  | C    |   |
| ANISOU | 2033 | CG  | LEU | A | 305 | 9139    | 7183   | 8569   | -35   | 2850   | 630  | C |
| ATOM   | 2034 | CD1 | LEU | A | 305 | -11.730 | 7.899  | 25.068 | 1.00  | 63.05  | C    |   |
| ANISOU | 2034 | CD1 | LEU | A | 305 | 8776    | 6898   | 8283   | 87    | 2662   | 683  | C |
| ATOM   | 2035 | CD2 | LEU | A | 305 | -11.983 | 9.889  | 26.569 | 1.00  | 66.55  | C    |   |
| ANISOU | 2035 | CD2 | LEU | A | 305 | 9403    | 7052   | 8833   | -71   | 3227   | 516  | C |
| ATOM   | 2036 | O   | LEU | A | 305 | -16.876 | 9.574  | 27.134 | 1.00  | 77.85  | O    |   |
| ANISOU | 2036 | O   | LEU | A | 305 | 10514   | 8815   | 10251  | 319   | 3339   | 1174 | O |
| ATOM   | 2037 | N   | PHE | A | 306 | -16.606 | 7.341  | 27.232 | 1.00  | 73.07  | N    |   |
| ANISOU | 2037 | N   | PHE | A | 306 | 9760    | 8588   | 9417   | 156   | 2741   | 1174 | N |
| ATOM   | 2038 | CA  | PHE | A | 306 | -18.018 | 7.042  | 27.029 | 1.00  | 74.49  | C    |   |
| ANISOU | 2038 | CA  | PHE | A | 306 | 9789    | 8917   | 9596   | 277   | 2706   | 1413 | C |
| ATOM   | 2039 | C   | PHE | A | 306 | -18.761 | 6.976  | 28.361 | 1.00  | 80.01  | C    |   |
| ANISOU | 2039 | C   | PHE | A | 306 | 10464   | 9745   | 10191  | 149   | 2761   | 1429 | C |
| ATOM   | 2040 | CB  | PHE | A | 306 | -18.182 | 5.722  | 26.275 | 1.00  | 67.40  | C    |   |
| ANISOU | 2040 | CB  | PHE | A | 306 | 8745    | 8218   | 8644   | 286   | 2361   | 1519 | C |
| ATOM   | 2041 | CG  | PHE | A | 306 | -17.499 | 5.698  | 24.937 | 1.00  | 61.12  | C    |   |
| ANISOU | 2041 | CG  | PHE | A | 306 | 7950    | 7351   | 7921   | 408   | 2299   | 1508 | C |
| ATOM   | 2042 | CD1 | PHE | A | 306 | -18.170 | 6.101  | 23.794 | 1.00  | 58.13  | C    |   |
| ANISOU | 2042 | CD1 | PHE | A | 306 | 7479    | 6978   | 7630   | 627   | 2381   | 1696 | C |
| ATOM   | 2043 | CD2 | PHE | A | 306 | -16.187 | 5.269  | 24.823 | 1.00  | 58.07  | C    |   |
| ANISOU | 2043 | CD2 | PHE | A | 306 | 7642    | 6922   | 7501   | 306   | 2161   | 1328 | C |
| ATOM   | 2044 | CE1 | PHE | A | 306 | -17.544 | 6.077  | 22.562 | 1.00  | 56.97  | C    |   |
| ANISOU | 2044 | CE1 | PHE | A | 306 | 7318    | 6803   | 7526   | 734   | 2326   | 1699 | C |
| ATOM   | 2045 | CE2 | PHE | A | 306 | -15.555 | 5.245  | 23.594 | 1.00  | 53.90  | C    |   |
| ANISOU | 2045 | CE2 | PHE | A | 306 | 7106    | 6351   | 7025   | 418   | 2112   | 1324 | C |

|        |      |     |     |   |     |         |        |        |      |       |      |   |
|--------|------|-----|-----|---|-----|---------|--------|--------|------|-------|------|---|
| ATOM   | 2046 | CZ  | PHE | A | 306 | -16.234 | 5.649  | 22.462 | 1.00 | 54.06 | C    |   |
| ANISOU | 2046 | CZ  | PHE | A | 306 | 7034    | 6385   | 7123   | 629  | 2194  | 1507 | C |
| ATOM   | 2047 | O   | PHE | A | 306 | -19.673 | 7.762  | 28.616 | 1.00 | 82.85 | O    |   |
| ANISOU | 2047 | O   | PHE | A | 306 | 10811   | 10068  | 10601  | 246  | 3011  | 1530 | O |
| TER    | 2048 |     | PHE | A | 306 |         |        |        |      |       |      |   |
| ATOM   | 2048 | C18 | RET | B | 400 | 8.566   | 6.307  | 11.943 | 1.00 | 24.03 | C    |   |
| ATOM   | 2049 | C5  | RET | B | 400 | 7.379   | 7.203  | 12.021 | 1.00 | 20.83 | C    |   |
| ATOM   | 2050 | C6  | RET | B | 400 | 6.109   | 6.750  | 11.941 | 1.00 | 19.19 | C    |   |
| ATOM   | 2051 | C1  | RET | B | 400 | 4.937   | 7.703  | 11.796 | 1.00 | 24.47 | C    |   |
| ATOM   | 2052 | C2  | RET | B | 400 | 5.388   | 9.090  | 11.313 | 1.00 | 28.40 | C    |   |
| ATOM   | 2053 | C3  | RET | B | 400 | 6.586   | 9.596  | 12.091 | 1.00 | 28.52 | C    |   |
| ATOM   | 2054 | C4  | RET | B | 400 | 7.743   | 8.644  | 11.872 | 1.00 | 24.32 | C    |   |
| ATOM   | 2055 | C16 | RET | B | 400 | 4.215   | 7.856  | 13.147 | 1.00 | 27.06 | C    |   |
| ATOM   | 2056 | C17 | RET | B | 400 | 3.904   | 7.219  | 10.773 | 1.00 | 21.24 | C    |   |
| ATOM   | 2057 | C7  | RET | B | 400 | 5.842   | 5.302  | 12.008 | 1.00 | 21.50 | C    |   |
| ATOM   | 2058 | C8  | RET | B | 400 | 4.795   | 4.570  | 12.433 | 1.00 | 26.28 | C    |   |
| ATOM   | 2059 | C9  | RET | B | 400 | 4.762   | 3.098  | 12.339 | 1.00 | 30.68 | C    |   |
| ATOM   | 2060 | C10 | RET | B | 400 | 3.771   | 2.341  | 12.851 | 1.00 | 37.20 | C    |   |
| ATOM   | 2061 | C11 | RET | B | 400 | 2.534   | 2.856  | 13.398 | 1.00 | 39.19 | C    |   |
| ATOM   | 2062 | C12 | RET | B | 400 | 1.742   | 2.158  | 14.216 | 1.00 | 42.22 | C    |   |
| ATOM   | 2063 | C13 | RET | B | 400 | 0.908   | 1.020  | 13.830 | 1.00 | 42.10 | C    |   |
| ATOM   | 2064 | C14 | RET | B | 400 | -0.348  | 0.984  | 14.271 | 1.00 | 42.95 | C    |   |
| ATOM   | 2065 | C15 | RET | B | 400 | -1.240  | -0.161 | 14.008 | 1.00 | 45.99 | C    |   |
| ATOM   | 2066 | O1  | RET | B | 400 | -2.427  | -0.130 | 14.262 | 1.00 | 48.88 | O    |   |
| ATOM   | 2067 | C20 | RET | B | 400 | 1.577   | -0.220 | 13.364 | 1.00 | 47.36 | C    |   |
| ATOM   | 2068 | C19 | RET | B | 400 | 6.010   | 2.370  | 11.977 | 1.00 | 29.34 | C    |   |
| TER    | 2070 |     | RET | B | 400 |         |        |        |      |       |      |   |
| HETATM | 2069 | O   | HOH | S | 1   | 0.000   | 0.651  | 0.000  | 1.00 | 13.96 | O    |   |
| HETATM | 2070 | O   | HOH | S | 2   | -2.133  | 13.731 | 1.777  | 1.00 | 22.07 | O    |   |
| HETATM | 2071 | O   | HOH | S | 3   | -2.096  | 11.821 | 29.637 | 1.00 | 17.64 | O    |   |
| HETATM | 2072 | O   | HOH | S | 4   | 3.919   | 21.110 | 24.583 | 1.00 | 18.33 | O    |   |
| HETATM | 2073 | O   | HOH | S | 5   | 9.437   | 16.660 | 23.224 | 1.00 | 23.00 | O    |   |
| HETATM | 2074 | O   | HOH | S | 6   | 6.358   | 19.658 | 23.907 | 1.00 | 24.06 | O    |   |
| HETATM | 2075 | O   | HOH | S | 7   | -4.490  | 14.678 | 4.789  | 1.00 | 20.15 | O    |   |
| HETATM | 2076 | O   | HOH | S | 8   | -7.142  | 2.228  | 25.372 | 1.00 | 21.65 | O    |   |
| HETATM | 2077 | O   | HOH | S | 9   | -8.336  | 7.433  | 1.385  | 1.00 | 17.96 | O    |   |
| HETATM | 2078 | O   | HOH | S | 10  | 7.334   | 13.553 | 32.082 | 1.00 | 20.90 | O    |   |
| HETATM | 2079 | O   | HOH | S | 11  | 9.558   | 16.829 | 20.553 | 1.00 | 22.68 | O    |   |
| HETATM | 2080 | O   | HOH | S | 12  | 2.599   | 24.372 | 26.568 | 1.00 | 20.08 | O    |   |
| HETATM | 2081 | O   | HOH | S | 13  | 2.897   | 21.722 | 17.302 | 1.00 | 21.79 | O    |   |
| HETATM | 2082 | O   | HOH | S | 14  | -1.637  | -3.738 | 28.240 | 1.00 | 27.29 | O    |   |
| HETATM | 2083 | O   | HOH | S | 15  | 9.398   | 14.460 | 24.772 | 1.00 | 19.86 | O    |   |
| HETATM | 2084 | O   | HOH | S | 16  | 3.635   | 19.004 | 15.126 | 1.00 | 17.92 | O    |   |
| HETATM | 2085 | O   | HOH | S | 17  | -13.363 | 28.258 | 3.997  | 1.00 | 25.66 | O    |   |
| HETATM | 2086 | O   | HOH | S | 18  | -6.952  | -0.649 | 7.818  | 1.00 | 26.87 | O    |   |
| HETATM | 2087 | O   | HOH | S | 19  | 11.314  | 18.185 | 18.960 | 1.00 | 27.16 | O    |   |
| HETATM | 2088 | O   | HOH | S | 20  | -1.607  | 15.342 | 35.280 | 1.00 | 26.47 | O    |   |
| HETATM | 2089 | O   | HOH | S | 21  | 6.425   | 1.734  | -0.205 | 1.00 | 38.61 | O    |   |
| HETATM | 2090 | O   | HOH | S | 22  | 2.313   | 20.486 | 9.133  | 1.00 | 23.10 | O    |   |
| HETATM | 2091 | O   | HOH | S | 23  | 9.023   | 5.797  | 0.673  | 1.00 | 24.20 | O    |   |
| HETATM | 2092 | O   | HOH | S | 24  | 4.335   | 22.275 | 27.010 | 1.00 | 20.43 | O    |   |
| HETATM | 2093 | O   | HOH | S | 25  | -0.548  | 7.973  | 34.292 | 1.00 | 21.05 | O    |   |
| HETATM | 2094 | O   | HOH | S | 26  | 7.175   | 15.440 | 2.371  | 1.00 | 30.09 | O    |   |
| HETATM | 2095 | O   | HOH | S | 27  | -0.435  | 23.547 | 31.454 | 1.00 | 23.49 | O    |   |
| HETATM | 2096 | O   | HOH | S | 28  | -3.491  | 21.347 | 14.159 | 1.00 | 19.10 | O    |   |
| HETATM | 2097 | O   | HOH | S | 29  | 1.440   | -0.890 | 39.778 | 1.00 | 28.97 | O    |   |
| HETATM | 2098 | O   | HOH | S | 30  | -7.184  | 16.618 | 27.444 | 1.00 | 20.47 | O    |   |
| HETATM | 2099 | O   | HOH | S | 31  | -1.473  | 27.956 | 11.524 | 1.00 | 25.04 | O    |   |
| HETATM | 2100 | O   | HOH | S | 32  | -11.282 | -1.210 | 8.978  | 1.00 | 28.24 | O    |   |
| HETATM | 2101 | O   | HOH | S | 33  | 1.005   | 30.504 | 17.501 | 1.00 | 28.06 | O    |   |
| HETATM | 2102 | O   | HOH | S | 34  | -1.277  | 28.729 | 21.622 | 1.00 | 20.52 | O    |   |
| HETATM | 2103 | O   | HOH | S | 35  | -3.267  | 6.266  | 1.897  | 1.00 | 25.74 | O    |   |
| HETATM | 2104 | O   | HOH | S | 36  | 2.622   | 24.010 | 15.948 | 1.00 | 27.68 | O    |   |
| HETATM | 2105 | O   | HOH | S | 37  | 1.438   | 24.488 | 21.287 | 1.00 | 30.11 | O    |   |
| HETATM | 2106 | O   | HOH | S | 38  | -0.826  | -1.538 | 7.113  | 1.00 | 30.49 | O    |   |
| HETATM | 2107 | O   | HOH | S | 39  | -6.048  | 5.704  | 1.875  | 1.00 | 28.70 | O    |   |
| HETATM | 2108 | O   | HOH | S | 40  | -10.909 | 23.138 | 29.911 | 1.00 | 28.45 | O    |   |
| HETATM | 2109 | O   | HOH | S | 41  | -12.178 | 1.959  | 15.891 | 1.00 | 21.80 | O    |   |
| HETATM | 2110 | O   | HOH | S | 42  | -4.871  | -3.160 | 8.785  | 1.00 | 27.47 | O    |   |
| HETATM | 2111 | O   | HOH | S | 43  | -6.420  | 37.906 | 13.884 | 1.00 | 29.95 | O    |   |

|        |      |   |     |   |     |         |         |        |      |       |   |
|--------|------|---|-----|---|-----|---------|---------|--------|------|-------|---|
| HETATM | 2112 | O | HOH | S | 44  | -14.312 | 1.809   | 14.003 | 1.00 | 29.06 | O |
| HETATM | 2113 | O | HOH | S | 45  | 2.651   | 25.453  | 23.922 | 1.00 | 24.99 | O |
| HETATM | 2114 | O | HOH | S | 46  | -8.858  | 1.808   | 3.996  | 1.00 | 29.91 | O |
| HETATM | 2115 | O | HOH | S | 47  | -4.620  | 1.086   | 32.770 | 1.00 | 34.97 | O |
| HETATM | 2116 | O | HOH | S | 48  | 11.496  | 8.916   | 35.230 | 1.00 | 30.42 | O |
| HETATM | 2117 | O | HOH | S | 49  | -2.524  | 6.251   | 33.694 | 1.00 | 21.97 | O |
| HETATM | 2118 | O | HOH | S | 50  | 16.867  | -6.095  | 16.604 | 1.00 | 29.61 | O |
| HETATM | 2119 | O | HOH | S | 51  | 5.857   | -4.306  | 22.058 | 1.00 | 28.81 | O |
| HETATM | 2120 | O | HOH | S | 52  | 7.222   | 21.074  | 21.346 | 1.00 | 37.21 | O |
| HETATM | 2121 | O | HOH | S | 53  | -1.907  | 1.595   | 34.119 | 1.00 | 27.91 | O |
| HETATM | 2122 | O | HOH | S | 54  | -16.351 | 3.085   | 10.414 | 1.00 | 30.18 | O |
| HETATM | 2123 | O | HOH | S | 55  | -0.510  | -5.115  | 22.034 | 1.00 | 36.39 | O |
| HETATM | 2124 | O | HOH | S | 56  | -15.729 | 16.587  | 7.911  | 1.00 | 30.94 | O |
| HETATM | 2125 | O | HOH | S | 57  | 15.865  | -2.025  | 20.432 | 1.00 | 34.07 | O |
| HETATM | 2126 | O | HOH | S | 58  | -4.268  | 2.277   | 3.234  | 1.00 | 40.73 | O |
| HETATM | 2127 | O | HOH | S | 59  | 8.092   | -1.743  | 34.109 | 1.00 | 26.29 | O |
| HETATM | 2128 | O | HOH | S | 60  | 16.247  | 9.718   | 18.653 | 1.00 | 36.77 | O |
| HETATM | 2129 | O | HOH | S | 61  | -0.683  | 8.582   | 37.016 | 1.00 | 31.29 | O |
| HETATM | 2130 | O | HOH | S | 62  | -12.591 | 13.836  | 14.186 | 1.00 | 39.62 | O |
| HETATM | 2131 | O | HOH | S | 63  | -13.579 | 37.901  | 29.986 | 1.00 | 35.98 | O |
| HETATM | 2132 | O | HOH | S | 64  | 5.403   | 20.392  | 14.042 | 1.00 | 42.41 | O |
| HETATM | 2133 | O | HOH | S | 65  | -4.986  | -7.028  | 18.075 | 1.00 | 41.39 | O |
| HETATM | 2134 | O | HOH | S | 66  | 16.577  | 7.170   | 25.744 | 1.00 | 35.43 | O |
| HETATM | 2135 | O | HOH | S | 67  | 9.640   | 20.976  | 15.306 | 1.00 | 34.95 | O |
| HETATM | 2136 | O | HOH | S | 68  | 0.856   | 15.785  | 5.422  | 1.00 | 28.77 | O |
| HETATM | 2137 | O | HOH | S | 69  | -8.421  | 23.333  | 30.937 | 1.00 | 33.07 | O |
| HETATM | 2138 | O | HOH | S | 70  | 18.203  | 2.867   | 18.730 | 1.00 | 37.79 | O |
| HETATM | 2139 | O | HOH | S | 71  | 15.682  | -1.561  | 28.279 | 1.00 | 37.18 | O |
| HETATM | 2140 | O | HOH | S | 72  | -1.524  | 16.588  | 2.784  | 1.00 | 31.98 | O |
| HETATM | 2141 | O | HOH | S | 73  | -15.154 | 21.624  | -2.325 | 1.00 | 32.35 | O |
| HETATM | 2142 | O | HOH | S | 74  | -1.429  | -0.507  | 23.121 | 1.00 | 33.19 | O |
| HETATM | 2143 | O | HOH | S | 75  | -4.657  | 21.385  | 11.409 | 1.00 | 40.45 | O |
| HETATM | 2144 | O | HOH | S | 76  | -13.800 | 11.662  | 14.935 | 1.00 | 35.55 | O |
| HETATM | 2145 | O | HOH | S | 77  | 5.413   | 23.549  | 19.547 | 1.00 | 37.78 | O |
| HETATM | 2146 | O | HOH | S | 78  | -17.268 | 18.648  | 0.677  | 1.00 | 50.14 | O |
| HETATM | 2147 | O | HOH | S | 79  | -20.316 | 20.606  | 10.935 | 1.00 | 32.73 | O |
| HETATM | 2148 | O | HOH | S | 80  | -6.883  | 2.958   | 2.763  | 1.00 | 29.52 | O |
| HETATM | 2149 | O | HOH | S | 81  | -7.090  | 21.341  | 32.642 | 1.00 | 36.87 | O |
| HETATM | 2150 | O | HOH | S | 82  | -8.178  | 23.606  | -3.008 | 1.00 | 36.66 | O |
| HETATM | 2151 | O | HOH | S | 83  | 8.410   | -3.710  | 27.304 | 1.00 | 34.84 | O |
| HETATM | 2152 | O | HOH | S | 84  | -12.203 | 18.870  | 18.670 | 1.00 | 48.65 | O |
| HETATM | 2153 | O | HOH | S | 85  | -12.803 | 25.001  | 23.276 | 1.00 | 35.79 | O |
| HETATM | 2154 | O | HOH | S | 86  | 6.899   | 23.291  | 27.001 | 1.00 | 33.64 | O |
| HETATM | 2155 | O | HOH | S | 87  | -19.382 | 25.567  | 1.014  | 1.00 | 37.21 | O |
| HETATM | 2156 | O | HOH | S | 88  | -12.793 | 8.899   | 14.828 | 1.00 | 39.31 | O |
| HETATM | 2157 | O | HOH | S | 89  | -12.434 | -3.213  | 17.267 | 1.00 | 42.95 | O |
| HETATM | 2158 | O | HOH | S | 90  | -2.557  | 7.150   | 38.231 | 1.00 | 48.69 | O |
| HETATM | 2159 | O | HOH | S | 91  | 11.288  | 12.940  | 34.177 | 1.00 | 47.67 | O |
| HETATM | 2160 | O | HOH | S | 92  | 13.372  | 6.909   | 36.188 | 1.00 | 40.42 | O |
| HETATM | 2161 | O | HOH | S | 93  | -3.758  | 5.401   | 36.088 | 1.00 | 38.01 | O |
| HETATM | 2162 | O | HOH | S | 94  | -2.294  | 3.966   | 32.582 | 1.00 | 31.12 | O |
| HETATM | 2163 | O | HOH | S | 95  | -19.778 | 27.040  | 7.748  | 1.00 | 37.31 | O |
| HETATM | 2164 | O | HOH | S | 96  | 8.837   | 13.675  | 34.131 | 1.00 | 29.78 | O |
| HETATM | 2165 | O | HOH | S | 97  | 7.635   | -2.031  | 7.663  | 1.00 | 35.46 | O |
| HETATM | 2166 | O | HOH | S | 98  | 2.995   | 22.775  | 13.352 | 1.00 | 35.12 | O |
| HETATM | 2167 | O | HOH | S | 99  | 15.122  | 13.745  | 16.763 | 1.00 | 47.79 | O |
| HETATM | 2168 | O | HOH | S | 100 | 1.813   | 22.836  | 10.703 | 1.00 | 41.28 | O |
| HETATM | 2169 | O | HOH | S | 101 | -10.038 | 25.064  | -6.452 | 1.00 | 44.75 | O |
| HETATM | 2170 | O | HOH | S | 102 | -14.930 | 12.137  | 19.929 | 1.00 | 34.74 | O |
| HETATM | 2171 | O | HOH | S | 103 | -4.649  | 14.492  | 32.539 | 1.00 | 52.16 | O |
| HETATM | 2172 | O | HOH | S | 104 | -6.057  | 13.569  | 30.618 | 1.00 | 62.62 | O |
| HETATM | 2173 | O | HOH | S | 105 | -7.352  | 3.144   | 30.422 | 1.00 | 44.77 | O |
| HETATM | 2174 | O | HOH | S | 106 | -5.630  | 37.168  | 11.045 | 1.00 | 40.05 | O |
| HETATM | 2175 | O | HOH | S | 107 | -1.060  | 20.812  | 7.032  | 1.00 | 34.64 | O |
| HETATM | 2176 | O | HOH | S | 108 | -15.474 | 14.040  | 8.542  | 1.00 | 38.18 | O |
| HETATM | 2177 | O | HOH | S | 109 | -15.858 | 5.388   | 8.776  | 1.00 | 35.14 | O |
| HETATM | 2178 | O | HOH | S | 110 | -10.706 | 19.483  | 16.806 | 1.00 | 38.61 | O |
| HETATM | 2179 | O | HOH | S | 111 | 7.588   | -12.614 | 12.036 | 1.00 | 38.59 | O |
| HETATM | 2180 | O | HOH | S | 112 | -15.526 | 30.490  | 26.155 | 1.00 | 45.64 | O |
| HETATM | 2181 | O | HOH | S | 113 | 11.413  | 18.303  | 23.928 | 1.00 | 43.56 | O |

|        |      |   |     |   |     |         |         |        |      |       |   |
|--------|------|---|-----|---|-----|---------|---------|--------|------|-------|---|
| HETATM | 2182 | O | HOH | S | 114 | -14.733 | -2.210  | 16.502 | 1.00 | 53.35 | O |
| HETATM | 2183 | O | HOH | S | 115 | -11.702 | 5.699   | 0.780  | 1.00 | 40.41 | O |
| HETATM | 2184 | O | HOH | S | 116 | -8.576  | 39.348  | 14.786 | 1.00 | 46.18 | O |
| HETATM | 2185 | O | HOH | S | 117 | -19.546 | 21.087  | 17.662 | 1.00 | 39.61 | O |
| HETATM | 2186 | O | HOH | S | 118 | -15.062 | 17.390  | 12.226 | 1.00 | 34.09 | O |
| HETATM | 2187 | O | HOH | S | 119 | -15.390 | 18.603  | 9.758  | 1.00 | 35.44 | O |
| HETATM | 2188 | O | HOH | S | 120 | 3.793   | -11.450 | 13.742 | 1.00 | 39.35 | O |
| HETATM | 2189 | O | HOH | S | 121 | -16.757 | 2.866   | 13.298 | 1.00 | 44.41 | O |
| HETATM | 2190 | O | HOH | S | 122 | 14.230  | 16.715  | 29.085 | 1.00 | 42.02 | O |
| HETATM | 2191 | O | HOH | S | 123 | 5.475   | -0.224  | 4.233  | 1.00 | 35.98 | O |
| HETATM | 2192 | O | HOH | S | 124 | -14.786 | 12.840  | 5.752  | 1.00 | 43.03 | O |
| HETATM | 2193 | O | HOH | S | 125 | -14.710 | 14.609  | 11.468 | 1.00 | 35.97 | O |
| HETATM | 2194 | O | HOH | S | 126 | -15.922 | 12.543  | 13.063 | 1.00 | 42.56 | O |
| HETATM | 2195 | O | HOH | S | 127 | -0.931  | -7.460  | 12.163 | 1.00 | 61.81 | O |
| HETATM | 2196 | O | HOH | S | 128 | 7.376   | 22.720  | 15.045 | 1.00 | 49.59 | O |
| HETATM | 2197 | O | HOH | S | 129 | -13.591 | 12.984  | -0.094 | 1.00 | 35.56 | O |
| HETATM | 2198 | O | HOH | S | 130 | 13.456  | 16.871  | 23.173 | 1.00 | 61.44 | O |
| HETATM | 2199 | O | HOH | S | 131 | 16.443  | -4.892  | 20.452 | 1.00 | 57.87 | O |
| HETATM | 2200 | O | HOH | S | 132 | -15.496 | 12.141  | 17.089 | 1.00 | 42.68 | O |
| HETATM | 2201 | O | HOH | S | 133 | -2.453  | 22.491  | 9.246  | 1.00 | 40.39 | O |
| HETATM | 2202 | O | HOH | S | 134 | 0.266   | 32.605  | 16.048 | 1.00 | 44.10 | O |
| HETATM | 2203 | O | HOH | S | 135 | 2.681   | -10.875 | 16.636 | 1.00 | 56.07 | O |
| HETATM | 2204 | O | HOH | S | 136 | -3.113  | 2.898   | 36.417 | 1.00 | 33.97 | O |
| HETATM | 2205 | O | HOH | S | 137 | -6.504  | -6.274  | 23.108 | 1.00 | 44.45 | O |
| HETATM | 2206 | O | HOH | S | 138 | 7.090   | 20.075  | 34.782 | 1.00 | 44.23 | O |
| HETATM | 2207 | O | HOH | S | 139 | -23.577 | 19.376  | 7.643  | 1.00 | 57.66 | O |
| HETATM | 2208 | O | HOH | S | 140 | -14.666 | 21.923  | 22.392 | 1.00 | 39.18 | O |
| HETATM | 2209 | O | HOH | S | 141 | 10.770  | 15.026  | 2.012  | 1.00 | 41.72 | O |
| HETATM | 2210 | O | HOH | S | 142 | 8.783   | 21.154  | 23.313 | 1.00 | 57.45 | O |
| HETATM | 2211 | O | HOH | S | 143 | -10.499 | 29.444  | 30.829 | 1.00 | 41.31 | O |
| HETATM | 2212 | O | HOH | S | 144 | 1.158   | 26.043  | 11.650 | 1.00 | 41.60 | O |
| HETATM | 2213 | O | HOH | S | 145 | 10.583  | -3.302  | 8.368  | 1.00 | 37.63 | O |
| HETATM | 2214 | O | HOH | S | 146 | -12.862 | 1.419   | 9.831  | 1.00 | 40.35 | O |
| HETATM | 2215 | O | HOH | S | 147 | 7.127   | 17.781  | 1.558  | 1.00 | 40.51 | O |
| HETATM | 2217 | O | HOH | S | 149 | -12.162 | 9.048   | 12.327 | 1.00 | 43.59 | O |
| HETATM | 2218 | O | HOH | S | 150 | -6.454  | -5.457  | 8.264  | 1.00 | 43.98 | O |
| HETATM | 2219 | O | HOH | S | 151 | -6.261  | -3.018  | 27.138 | 1.00 | 34.75 | O |
| HETATM | 2220 | O | HOH | S | 152 | -15.048 | 16.842  | -1.749 | 1.00 | 49.24 | O |
| HETATM | 2221 | O | HOH | S | 153 | -17.145 | 20.957  | -0.674 | 1.00 | 49.03 | O |
| HETATM | 2222 | O | HOH | S | 154 | -6.492  | 0.643   | 5.685  | 1.00 | 57.42 | O |
| HETATM | 2223 | O | HOH | S | 155 | 10.138  | 20.467  | 17.850 | 1.00 | 38.66 | O |
| HETATM | 2224 | O | HOH | S | 156 | -13.113 | -4.431  | 22.891 | 1.00 | 42.34 | O |
| HETATM | 2225 | O | HOH | S | 157 | -18.599 | 28.540  | 9.738  | 1.00 | 44.48 | O |
| HETATM | 2226 | O | HOH | S | 158 | 1.440   | 8.249   | 38.825 | 1.00 | 34.15 | O |
| HETATM | 2227 | O | HOH | S | 159 | -17.487 | 11.204  | 11.241 | 1.00 | 43.55 | O |
| HETATM | 2228 | O | HOH | S | 160 | -13.005 | 35.830  | 28.230 | 1.00 | 46.13 | O |
| HETATM | 2229 | O | HOH | S | 161 | 14.968  | 16.343  | 17.364 | 1.00 | 49.07 | O |
| HETATM | 2230 | O | HOH | S | 162 | 17.690  | 1.881   | 30.060 | 1.00 | 45.20 | O |
| HETATM | 2231 | O | HOH | S | 163 | 14.305  | 17.368  | 25.553 | 1.00 | 43.40 | O |
| HETATM | 2232 | O | HOH | S | 164 | -16.960 | 21.730  | 20.801 | 1.00 | 49.71 | O |
| HETATM | 2233 | O | HOH | S | 165 | -12.393 | 37.640  | 9.152  | 1.00 | 38.21 | O |
| HETATM | 2234 | O | HOH | S | 166 | -14.060 | 23.150  | 24.599 | 1.00 | 46.10 | O |
| HETATM | 2235 | O | HOH | S | 167 | -4.791  | 32.122  | 6.374  | 1.00 | 46.22 | O |
| HETATM | 2236 | O | HOH | S | 168 | -4.301  | 22.543  | 3.810  | 1.00 | 48.42 | O |
| HETATM | 2237 | O | HOH | S | 169 | 15.943  | 11.623  | 24.884 | 1.00 | 50.99 | O |
| HETATM | 2238 | O | HOH | S | 170 | -19.005 | 5.400   | 30.735 | 1.00 | 58.00 | O |
| HETATM | 2239 | O | HOH | S | 171 | -7.271  | -8.151  | 19.022 | 1.00 | 53.29 | O |
| HETATM | 2240 | O | HOH | S | 172 | -1.872  | -3.529  | 8.362  | 1.00 | 47.39 | O |
| HETATM | 2241 | O | HOH | S | 173 | 4.761   | 22.908  | 22.252 | 1.00 | 37.73 | O |
| HETATM | 2242 | O | HOH | S | 174 | -19.085 | -0.465  | 22.471 | 1.00 | 42.62 | O |
| HETATM | 2243 | O | HOH | S | 175 | -7.644  | 25.820  | 31.832 | 1.00 | 56.83 | O |
| HETATM | 2244 | O | HOH | S | 176 | -3.747  | 20.187  | 34.779 | 1.00 | 45.66 | O |
| HETATM | 2245 | O | HOH | S | 177 | 6.131   | -5.488  | 24.794 | 1.00 | 44.48 | O |
| HETATM | 2246 | O | HOH | S | 178 | -19.285 | 25.682  | 22.693 | 1.00 | 40.83 | O |
| HETATM | 2247 | O | HOH | S | 179 | -13.581 | 30.833  | 30.486 | 1.00 | 50.17 | O |
| HETATM | 2249 | O | HOH | S | 181 | -0.230  | 23.712  | 9.483  | 1.00 | 51.31 | O |
| HETATM | 2250 | O | HOH | S | 182 | -7.118  | 11.374  | 30.474 | 1.00 | 57.03 | O |
| HETATM | 2251 | O | HOH | S | 183 | -15.175 | 0.191   | 29.482 | 1.00 | 53.33 | O |
| HETATM | 2252 | O | HOH | S | 184 | -7.734  | 27.736  | 30.132 | 1.00 | 44.89 | O |
| HETATM | 2253 | O | HOH | S | 185 | 4.105   | -9.266  | 18.578 | 1.00 | 36.66 | O |



|        |      |   |     |   |     |         |         |        |      |       |   |
|--------|------|---|-----|---|-----|---------|---------|--------|------|-------|---|
| HETATM | 2254 | O | HOH | S | 186 | 7.440   | 25.255  | 28.502 | 1.00 | 37.93 | O |
| HETATM | 2255 | O | HOH | S | 187 | -13.626 | 26.429  | 25.545 | 1.00 | 42.59 | O |
| HETATM | 2256 | O | HOH | S | 188 | 1.217   | -5.344  | 26.961 | 1.00 | 44.72 | O |
| HETATM | 2257 | O | HOH | S | 189 | -24.254 | 26.752  | 10.190 | 1.00 | 42.07 | O |
| HETATM | 2258 | O | HOH | S | 190 | 13.310  | 15.135  | 1.824  | 1.00 | 46.20 | O |
| HETATM | 2259 | O | HOH | S | 191 | 15.841  | 0.794   | 4.191  | 1.00 | 48.56 | O |
| HETATM | 2260 | O | HOH | S | 192 | -15.274 | 5.530   | 2.295  | 1.00 | 56.08 | O |
| HETATM | 2261 | O | HOH | S | 193 | -19.871 | 27.883  | -0.195 | 1.00 | 54.43 | O |
| HETATM | 2262 | O | HOH | S | 194 | -20.988 | 23.641  | -0.237 | 1.00 | 54.18 | O |
| HETATM | 2263 | O | HOH | S | 195 | 17.175  | -1.717  | 16.772 | 1.00 | 50.97 | O |
| HETATM | 2264 | O | HOH | S | 196 | -0.358  | 26.254  | 9.474  | 1.00 | 48.57 | O |
| HETATM | 2265 | O | HOH | S | 197 | 3.224   | 17.391  | 12.883 | 1.00 | 42.27 | O |
| HETATM | 2266 | O | HOH | S | 198 | -14.218 | 19.117  | -2.709 | 1.00 | 48.23 | O |
| HETATM | 2267 | O | HOH | S | 199 | 6.021   | 10.896  | 40.004 | 1.00 | 54.09 | O |
| HETATM | 2268 | O | HOH | S | 200 | -4.608  | 16.859  | 34.281 | 1.00 | 62.14 | O |
| HETATM | 2269 | O | HOH | S | 201 | 18.808  | 3.959   | 16.353 | 1.00 | 56.19 | O |
| HETATM | 2270 | O | HOH | S | 202 | 7.850   | -0.522  | 5.441  | 1.00 | 50.15 | O |
| HETATM | 2271 | O | HOH | S | 203 | -16.608 | 3.683   | 5.955  | 1.00 | 55.92 | O |
| HETATM | 2272 | O | HOH | S | 204 | -2.814  | 20.472  | 3.667  | 1.00 | 45.71 | O |
| HETATM | 2273 | O | HOH | S | 205 | 15.936  | 13.635  | 26.811 | 1.00 | 54.30 | O |
| HETATM | 2274 | O | HOH | S | 206 | 0.000   | 13.999  | 0.000  | 1.00 | 46.38 | O |
| HETATM | 2275 | O | HOH | S | 207 | -0.645  | 36.948  | 15.890 | 1.00 | 50.18 | O |
| HETATM | 2276 | O | HOH | S | 208 | 14.153  | 7.512   | 3.311  | 1.00 | 44.68 | O |
| HETATM | 2277 | O | HOH | S | 209 | -18.187 | 12.964  | 9.175  | 1.00 | 54.27 | O |
| HETATM | 2278 | O | HOH | S | 210 | -16.083 | 12.586  | 1.543  | 1.00 | 61.75 | O |
| HETATM | 2279 | O | HOH | S | 211 | -8.252  | 38.565  | 17.174 | 1.00 | 54.59 | O |
| HETATM | 2280 | O | HOH | S | 212 | -2.175  | 15.710  | -2.188 | 1.00 | 58.00 | O |
| HETATM | 2281 | O | HOH | S | 213 | -13.268 | -4.614  | 19.307 | 1.00 | 48.40 | O |
| HETATM | 2282 | O | HOH | S | 214 | -10.949 | 2.273   | 2.002  | 1.00 | 44.31 | O |
| HETATM | 2283 | O | HOH | S | 215 | -13.731 | 33.153  | 29.130 | 1.00 | 48.38 | O |
| HETATM | 2284 | O | HOH | S | 216 | 13.381  | 22.168  | 10.358 | 1.00 | 54.34 | O |
| HETATM | 2285 | O | HOH | S | 217 | -4.219  | 24.995  | 3.136  | 1.00 | 54.49 | O |
| HETATM | 2286 | O | HOH | S | 218 | -20.139 | -5.309  | 22.839 | 1.00 | 60.99 | O |
| HETATM | 2287 | O | HOH | S | 219 | -8.657  | 15.936  | 29.633 | 1.00 | 48.40 | O |
| HETATM | 2288 | O | HOH | S | 220 | -2.634  | 3.435   | 39.169 | 1.00 | 54.30 | O |
| HETATM | 2289 | O | HOH | S | 221 | 15.585  | -8.679  | 16.967 | 1.00 | 55.63 | O |
| HETATM | 2290 | O | HOH | S | 222 | 15.005  | 13.114  | 13.869 | 1.00 | 51.43 | O |
| HETATM | 2291 | O | HOH | S | 223 | -12.186 | -4.898  | 14.875 | 1.00 | 56.00 | O |
| HETATM | 2292 | O | HOH | S | 224 | 16.375  | 16.826  | 15.109 | 1.00 | 64.33 | O |
| HETATM | 2293 | O | HOH | S | 225 | 0.299   | 3.907   | 16.781 | 1.00 | 21.95 | O |
| HETATM | 2294 | O | HOH | S | 226 | -9.094  | 20.402  | 34.453 | 1.00 | 61.15 | O |
| HETATM | 2295 | O | HOH | S | 227 | -20.077 | 18.089  | 12.589 | 1.00 | 58.07 | O |
| HETATM | 2296 | O | HOH | S | 228 | 18.911  | 0.123   | 18.799 | 1.00 | 47.44 | O |
| HETATM | 2297 | O | HOH | S | 229 | -16.101 | 22.555  | -4.717 | 1.00 | 52.80 | O |
| HETATM | 2299 | O | HOH | S | 231 | -12.408 | 37.461  | 6.289  | 1.00 | 44.62 | O |
| HETATM | 2300 | O | HOH | S | 232 | -14.404 | 39.376  | 5.611  | 1.00 | 55.08 | O |
| HETATM | 2301 | O | HOH | S | 233 | -18.622 | -6.773  | 21.367 | 1.00 | 66.84 | O |
| HETATM | 2302 | O | HOH | S | 234 | -8.245  | 7.819   | 32.567 | 1.00 | 57.83 | O |
| HETATM | 2303 | O | HOH | S | 235 | -1.787  | 22.086  | 35.014 | 1.00 | 63.53 | O |
| HETATM | 2304 | O | HOH | S | 236 | 5.615   | 25.465  | 23.164 | 1.00 | 56.74 | O |
| HETATM | 2305 | O | HOH | S | 237 | 19.415  | -2.845  | 16.765 | 1.00 | 50.94 | O |
| HETATM | 2306 | O | HOH | S | 238 | -25.519 | 26.276  | 7.709  | 1.00 | 46.07 | O |
| HETATM | 2307 | O | HOH | S | 239 | -11.870 | 16.377  | 27.752 | 1.00 | 45.26 | O |
| HETATM | 2308 | O | HOH | S | 240 | 9.021   | -10.829 | 18.908 | 1.00 | 58.67 | O |
| HETATM | 2309 | O | HOH | S | 241 | -21.666 | 26.018  | 3.058  | 1.00 | 50.38 | O |
| HETATM | 2310 | O | HOH | S | 242 | -13.709 | 11.319  | -2.340 | 1.00 | 39.02 | O |
| HETATM | 2311 | O | HOH | S | 243 | 10.391  | -8.588  | 18.259 | 1.00 | 61.78 | O |
| HETATM | 2312 | O | HOH | S | 244 | 15.626  | 16.644  | 12.660 | 1.00 | 54.88 | O |
| HETATM | 2313 | O | HOH | S | 245 | 4.202   | 25.619  | 12.365 | 1.00 | 62.28 | O |
| HETATM | 2314 | O | HOH | S | 246 | 10.783  | -5.037  | 27.674 | 1.00 | 52.02 | O |
| HETATM | 2315 | O | HOH | S | 247 | 2.141   | 18.396  | 34.178 | 1.00 | 38.44 | O |
| HETATM | 2316 | O | HOH | S | 248 | 20.065  | -5.349  | 16.855 | 1.00 | 39.55 | O |
| HETATM | 2317 | O | HOH | S | 249 | -1.203  | 4.169   | 14.481 | 1.00 | 32.54 | O |
| HETATM | 2318 | O | HOH | S | 250 | 9.748   | 22.909  | 29.823 | 1.00 | 48.65 | O |
| HETATM | 2319 | O | HOH | S | 251 | 18.255  | -1.190  | 20.912 | 1.00 | 52.48 | O |
| HETATM | 2320 | O | HOH | S | 252 | -3.650  | 14.054  | -3.286 | 1.00 | 46.05 | O |
| HETATM | 2321 | O | HOH | S | 253 | 18.659  | -0.840  | 12.243 | 1.00 | 43.68 | O |
| HETATM | 2322 | O | HOH | S | 254 | -13.401 | 36.550  | 25.786 | 1.00 | 48.25 | O |
| HETATM | 2323 | O | HOH | S | 255 | 11.479  | 20.551  | 30.970 | 1.00 | 47.64 | O |
| HETATM | 2324 | O | HOH | S | 256 | 1.625   | 27.116  | 19.655 | 1.00 | 57.34 | O |

|        |      |   |     |   |     |         |         |        |      |       |   |
|--------|------|---|-----|---|-----|---------|---------|--------|------|-------|---|
| HETATM | 2325 | O | HOH | S | 257 | 11.867  | 11.294  | 36.524 | 1.00 | 56.39 | O |
| HETATM | 2326 | O | HOH | S | 258 | -10.006 | 42.022  | 16.109 | 1.00 | 65.93 | O |
| HETATM | 2327 | O | HOH | S | 259 | -21.539 | 27.767  | 20.241 | 1.00 | 44.33 | O |
| HETATM | 2328 | O | HOH | S | 260 | -15.109 | 2.505   | 3.185  | 1.00 | 55.11 | O |
| HETATM | 2329 | O | HOH | S | 261 | -1.538  | 2.450   | 41.305 | 1.00 | 53.50 | O |
| HETATM | 2330 | O | HOH | S | 262 | -6.171  | 34.176  | 5.315  | 1.00 | 65.41 | O |
| HETATM | 2331 | O | HOH | S | 263 | -3.828  | 38.765  | 14.310 | 1.00 | 57.43 | O |
| HETATM | 2332 | O | HOH | S | 264 | -11.535 | 1.111   | 6.812  | 1.00 | 40.01 | O |
| HETATM | 2333 | O | HOH | S | 265 | 0.376   | -10.609 | 15.551 | 1.00 | 51.23 | O |
| HETATM | 2334 | O | HOH | S | 266 | 7.451   | 22.848  | 30.975 | 1.00 | 55.10 | O |
| HETATM | 2335 | O | HOH | S | 267 | 15.769  | 0.329   | 30.736 | 1.00 | 53.91 | O |
| HETATM | 2336 | O | HOH | S | 268 | 13.138  | -5.411  | 19.590 | 1.00 | 47.45 | O |
| HETATM | 2337 | O | HOH | S | 269 | 9.036   | 20.824  | 31.417 | 1.00 | 52.23 | O |
| HETATM | 2339 | O | HOH | S | 271 | 20.782  | -0.963  | 13.750 | 1.00 | 62.37 | O |
| HETATM | 2340 | O | HOH | S | 272 | -16.114 | 27.507  | 25.011 | 1.00 | 57.42 | O |
| HETATM | 2341 | O | HOH | S | 273 | -6.289  | -5.692  | 27.599 | 1.00 | 46.02 | O |
| HETATM | 2342 | O | HOH | S | 274 | -14.916 | 9.334   | -1.282 | 1.00 | 59.72 | O |
| HETATM | 2343 | O | HOH | S | 275 | 5.579   | -13.945 | 13.948 | 1.00 | 52.20 | O |
| HETATM | 2344 | O | HOH | S | 276 | 5.228   | 27.250  | 21.027 | 1.00 | 43.65 | O |
| HETATM | 2345 | O | HOH | S | 277 | 18.741  | 5.948   | 23.010 | 1.00 | 53.71 | O |
| HETATM | 2346 | O | HOH | S | 278 | -3.254  | 2.415   | 13.592 | 1.00 | 42.15 | O |
| HETATM | 2348 | O | HOH | S | 280 | 13.324  | 13.938  | 23.041 | 1.00 | 44.78 | O |
| HETATM | 2349 | O | HOH | S | 281 | -11.151 | 38.866  | 19.484 | 1.00 | 49.85 | O |
| HETATM | 2350 | O | HOH | S | 282 | -21.017 | 19.270  | 16.854 | 1.00 | 68.17 | O |
| HETATM | 2351 | O | HOH | S | 283 | 16.542  | 10.999  | 21.812 | 1.00 | 51.19 | O |
| HETATM | 2352 | O | HOH | S | 284 | 4.684   | 18.965  | 11.159 | 1.00 | 51.36 | O |
| HETATM | 2353 | O | HOH | S | 285 | -10.652 | 36.540  | 4.565  | 1.00 | 44.83 | O |
| HETATM | 2354 | O | HOH | S | 286 | 10.066  | -7.789  | 7.212  | 1.00 | 50.87 | O |
| HETATM | 2355 | O | HOH | S | 287 | -15.897 | 14.679  | 26.844 | 1.00 | 59.46 | O |
| HETATM | 2356 | O | HOH | S | 288 | 0.002   | 19.869  | 33.823 | 1.00 | 49.20 | O |
| HETATM | 2357 | O | HOH | S | 289 | 17.837  | 8.618   | 22.256 | 1.00 | 60.36 | O |
| HETATM | 2358 | O | HOH | S | 290 | 10.325  | -11.630 | 13.910 | 1.00 | 37.15 | O |
| HETATM | 2359 | O | HOH | S | 291 | 12.233  | 13.969  | 4.969  | 1.00 | 45.26 | O |
| HETATM | 2360 | O | HOH | S | 292 | 8.026   | 3.349   | -0.713 | 1.00 | 46.61 | O |
| HETATM | 2361 | O | HOH | S | 293 | -16.082 | -4.892  | 22.518 | 1.00 | 61.25 | O |
| HETATM | 2362 | O | HOH | S | 294 | -17.200 | -2.644  | 23.870 | 1.00 | 59.86 | O |
| HETATM | 2363 | O | HOH | S | 295 | 19.399  | -7.610  | 16.089 | 1.00 | 53.06 | O |
| HETATM | 2364 | O | HOH | S | 296 | -7.055  | 16.430  | 32.282 | 1.00 | 62.01 | O |
| HETATM | 2365 | O | HOH | S | 297 | 1.595   | -11.134 | 12.005 | 1.00 | 51.93 | O |
| HETATM | 2366 | O | HOH | S | 298 | -19.109 | 32.138  | 20.979 | 1.00 | 55.48 | O |
| HETATM | 2367 | O | HOH | S | 299 | 16.660  | 10.959  | 9.716  | 1.00 | 56.09 | O |
| HETATM | 2368 | O | HOH | S | 300 | 12.049  | 16.481  | 5.499  | 1.00 | 50.61 | O |
| HETATM | 2369 | O | HOH | S | 301 | -20.968 | 26.572  | 13.087 | 1.00 | 47.61 | O |
| HETATM | 2370 | O | HOH | S | 302 | -4.515  | 0.152   | 1.111  | 1.00 | 61.83 | O |
| HETATM | 2371 | O | HOH | S | 303 | 11.378  | -5.549  | 7.022  | 1.00 | 66.60 | O |
| HETATM | 2372 | O | HOH | S | 304 | 8.901   | 27.289  | 26.656 | 1.00 | 54.68 | O |
| HETATM | 2373 | O | HOH | S | 305 | -17.063 | -3.778  | 15.831 | 1.00 | 56.98 | O |
| HETATM | 2374 | O | HOH | S | 306 | 9.201   | 21.633  | 8.018  | 1.00 | 42.14 | O |
| HETATM | 2375 | O | HOH | S | 307 | -8.104  | 23.160  | -6.001 | 1.00 | 48.40 | O |
| HETATM | 2377 | O | HOH | S | 309 | -12.581 | 18.698  | 29.365 | 1.00 | 67.30 | O |
| HETATM | 2378 | O | HOH | S | 310 | -6.488  | 21.061  | -2.477 | 1.00 | 46.69 | O |
| HETATM | 2379 | O | HOH | S | 311 | -17.221 | -6.079  | 25.012 | 1.00 | 62.62 | O |
| HETATM | 2380 | O | HOH | S | 312 | -2.580  | 35.629  | 9.721  | 1.00 | 46.00 | O |
| HETATM | 2381 | O | HOH | S | 313 | 19.084  | -10.119 | 15.726 | 1.00 | 51.22 | O |
| HETATM | 2383 | O | HOH | S | 315 | -4.425  | 21.833  | -1.044 | 1.00 | 66.35 | O |
| TER    | 2379 |   | HOH | S | 315 |         |         |        |      |       |   |
| END    |      |   |     |   |     |         |         |        |      |       |   |
